# Supplementary material for: Prevalence and correlates of SARS-CoV-2 seropositivity among people who inject drugs in the San Diego-Tijuana border region
Source: PubMed Central journal article supplement (PMC8608290; doi:10.1371/journal.pone.0260286), 2021-11-22
Supplement: pone.0260286.s002.pdf [file pone.0260286.s002.pdf]

## TABLE OF CONTENTS

|                                                            |                    |
|------------------------------------------------------------|--------------------|
| <b><u>BASELINE QUESTIONNAIRE – ENGLISH VERSION</u></b>     | <b><u>2</u></b>    |
| <b><u>BASELINE QUESTIONNAIRE – SPANISH VERSION</u></b>     | <b><u>345</u></b>  |
| <b><u>SUPPLEMENTAL QUESTIONNAIRE – ENGLISH VERSION</u></b> | <b><u>717</u></b>  |
| <b><u>SUPPLEMENTAL QUESTIONNAIRE – SPANISH VERSION</u></b> | <b><u>1074</u></b> |

## **La Frontera Project**

# Baseline Survey – English version

Disclaimer: This survey has been formatted for programming into QDS and is not intended to be administered on pencil and paper

PI: Steffanie Strathdee  
10-18-2021



Q6. Specify other place of Interview

---

*If Q4 is equal to 2 then skip to Q7*

*If not, then skip to Q9.*

- Q7. Place of Interview (Choose one)
- |   |                                |
|---|--------------------------------|
| 1 | Tijuana 1 Zona Norte - El Mapa |
| 2 | Tijuana 2 Coahuila Office      |
| 3 | Tijuana 3                      |
| 4 | Rehabilitation Center          |
| 5 | Jail                           |
| 6 | Other                          |

*If Q7 is not equal to 6, then skip to Q9.*

Q8. Specify other place of Interview

---

Q9. Interviewer, how will this interview be conducted? (Choose one)

- |   |                                |
|---|--------------------------------|
| 1 | In Person, Inside              |
| 2 | In Person, Outside             |
| 3 | Video call (e.g., zoom, skype) |
| 4 | Audio Call (e.g., phone, zoom) |
| 5 | Other                          |
| 8 | Refuse to Answer               |

*If Q9 is not equal to 5, then skip to Q11.*

Q10. Please, specify Other.

-----  
Q11. Participant ID Number (e.g., LF001):

*ID1 = SubString(Q11, 0, 1)*

*ID2 = SubString(Q11, 1, 1)*

*ID3 = SubString(Q11, 2, 1)*

*ID4 = SubString(Q11, 3, 1)*

*ID5 = SubString(Q11, 4, 1)*

*IDSTUDY = Concatenated(ID1, ID2)*

*If IDSTUDY is not equal to LF then READ: "Check ID." and skip to Q11.*

*If ID3 is not equal to 0 and ID3 is not equal to 1 and ID3 is not equal to 2 and ID3 is not equal to 3 and ID3 is not equal to 4 and ID3 is not equal to 5 and ID3 is not equal to 6 and ID3 is not equal to 7 and ID3 is not equal to 8 and ID3 is not equal to 9 or ID4 is not equal to 0 and ID4 is not equal to 1 and ID4 is not equal to 2 and ID4 is not equal to 3 and ID4 is not equal to 4 and ID4 is not equal to 5 and ID4 is not equal to 6 and ID4 is not equal to 7 and ID4 is not equal to 8 and ID4 is not equal to 9 or ID5 is not equal to 0 and ID5 is not equal to 1 and ID5 is not equal to 2 and ID5 is not equal to 3 and ID5 is not equal to 4 and ID5 is not equal to 5 and ID5 is not equal to 6 and ID5 is not equal to 7 and ID5 is not equal to 8 and ID5 is not equal to 9 then READ: "Check ID." and skip to Q11.*

Q12. Please enter the SCREENER ID of the Subject (e.g., LF0001).

**NOTE TO THE INTERVIEWER: Please do not confuse the screener number with the Subject ID number!**

-----  
*SCRID1 = SubString(Q12, 0, 1)*

*SCRID2 = SubString(Q12, 1, 1)*

*SCRID3 = SubString(Q12, 2, 1)*

*SCRID4 = SubString(Q12, 3, 1)*

*SCRID5 = SubString(Q12, 4, 1)*

*SCRID6 = SubString(Q12, 5, 1)*

*IDSCREEN = Concatenated(SCRID1, SCRID2)*

*If IDSCREEN is not equal to LF then READ: "Check Screen ID." and skip to Q12.*

*If SCRID3 is not equal to 0 and SCRID3 is not equal to 1 and SCRID3 is not equal to 2 and SCRID3 is not equal to 3 and SCRID3 is not equal to 4 and SCRID3 is not equal to 5 and SCRID3 is not equal to 6 and SCRID3 is not equal to 7 and SCRID3 is not equal to 8 and SCRID3 is not equal to 9 or SCRID4 is not equal to 0 and SCRID4 is not equal to 1 and SCRID4 is not equal to 2 and SCRID4 is not equal to 3 and SCRID4 is not equal to 4 and SCRID4 is not equal to 5 and SCRID4 is not equal to 6 and SCRID4 is not equal to 7 and SCRID4 is not equal to 8 and SCRID4 is not equal to 9 or SCRID5 is not equal to 0 and SCRID5 is not equal to 1 and SCRID5 is not equal to 2 and SCRID5 is not equal to 3 and SCRID5 is not equal to 4 and SCRID5 is not equal to 5 and SCRID5 is not equal to 6 and SCRID5 is not equal to 7 and SCRID5 is not equal to 8 and SCRID5 is not equal to 9 or SCRID6 is not equal to 0 and SCRID6 is not equal to 1 and SCRID6 is not equal to 2 and SCRID6 is not equal to 3 and SCRID6 is not equal to 4 and SCRID6 is not equal to 5 and SCRID6 is not equal to 6 and SCRID6 is not equal to 7 and SCRID6 is not equal to 8 and SCRID6 is not equal to 9 then READ: "Check Screen ID." and skip to Q11.*

Q13. What languages do you speak, even if not very well?

**Interviewer: Read out the options and check all that apply** (Check all that apply)

- Spanish
- English
- Indigenous language
- Other
- Refuse to Answer

*If Q13D is not equal to 1, then skip to instruction before Q15.*

Q14. Please specify other language. \_\_\_\_\_

*If Q13B is not equal to 1, then skip to instruction before Q17.*

Q15. How well do you **speak** English? (Choose one)

|   |                         |
|---|-------------------------|
| 0 | Fluently/Native speaker |
| 1 | Very well               |
| 2 | OK                      |
| 3 | Not very well           |
| 8 | Refuse to Answer        |

Q16. How well do you **Read/Write** English? (Choose one)

|   |                  |
|---|------------------|
| 0 | Perfectly        |
| 1 | Very well        |
| 2 | OK               |
| 3 | Not very well    |
| 4 | Not at all       |
| 8 | Refuse to Answer |

*If Q13A is not equal to 1, then skip to instruction before A1.*

Q17. How well do you **speak** Spanish? (Choose one)

|   |                         |
|---|-------------------------|
| 0 | Fluently/Native speaker |
| 1 | Very well               |
| 2 | OK                      |
| 3 | Not very well           |
| 8 | Refuse to Answer        |

|      |                                                         |   |                  |
|------|---------------------------------------------------------|---|------------------|
| Q18. | How well do you <b>Read/Write</b> Spanish? (Choose one) | 0 | Perfectly        |
|      |                                                         | 1 | Very well        |
|      |                                                         | 2 | OK               |
|      |                                                         | 3 | Not very well    |
|      |                                                         | 4 | Not at all       |
|      |                                                         | 8 | Refuse to Answer |

**READ: INTERVIEW, BEFORE STARTING, PLEASE READ THE FOLLOWING TEXT ALOUD TO THE RESPONDENT:**

*This interview is part of a research study about HIV/HCV and overdose among people who inject drugs in San Diego and Tijuana. The questions we will be asking are related to some basic information about you, your drug use history, experiences in San Diego and Tijuana, sexual behaviors, utilization of drug treatment and other services, and your attitudes towards some of these issues. I know some of the questions we will ask may be a little uncomfortable for you to answer, but the interview is confidential, and we will not give any of your personal information to anyone outside of this project. Nothing that you tell us can be traced back to you as an individual. It is important that you know that your participation in this interview is entirely voluntary. You do not need to answer a question if you do not want to, and you may stop the interview at any point. Do you have any questions before we begin?*



SCREENING

**READ: INTERVIEWER READ TO THE RESPONDENT: First, I am going to ask you some basic information about yourself.**

- A1. What is your age, in years? \_\_\_\_\_ Years Old  
 998 Refuse to Answer
- A2. What is your date of birth? \_\_\_\_ / \_\_\_\_ / \_\_\_\_\_ mm / dd / yyyy  
 2098 Refuse to Answer (Year)

**If Age(A2, TODAY) is not equal to A1 and A1 is not equal to 998 and A2 is not equal to 2098 then READ: "The age and date of birth you have entered do not agree. Please check the responses." and skip to A1.**

**If A1 is less than 18 or A1 is equal to 998, then skip to end of questionnaire.**

- A3. When was the last time you injected drugs?  
**Interviewer: code "TODAY" as 0 days ago** \_\_\_\_\_ MONTHS  
 \_\_\_\_\_ DAYS  
 9998 Refuse to Answer (Days)

**If A3 is greater than 30 or A3 is equal to 9998, then skip to end of questionnaire.**

- A4. Have you previously been enrolled in any research study such as El Cuete, Mujer Segura, Mujer Mas Segura? 1 Yes  
 0 No  
 8 Refuse to Answer

**If A4 is not equal to 1, then skip to instruction before A6.**

- A5. Which study did you participate in? (Check all that apply) \_\_\_\_\_ El Cuete  
 \_\_\_\_\_ Mujer Saludable Siempre  
 \_\_\_\_\_ Proyecto EPICO  
 \_\_\_\_\_ Other  
 \_\_\_\_\_ Refuse to Answer

**If A5D is not equal to 1, then skip to A7.**

A6. Please specify Which other project you participated in

-----

- A7. In what country do you live in? (Choose one)
- 1 United States
  - 2 Mexico
  - 3 Other
  - 8 Refuse to Answer

***If A7 is equal to 3 or A7 is equal to 8, then skip to end of questionnaire.***

***If A7 is equal to 1 then skip to A8***

***If not, then skip to instruction before A12.***

A8. What region of San Diego County do you live in? (Choose one)

- 1 City of San Diego
- 2 East County
- 3 North County Coastal
- 4 North County Inland
- 5 South Bay
- 6 Other San Diego region
- 7 I do not live in San Diego County
- 8 Refuse to Answer

***If A8 is not equal to 6, then skip to instruction before A10.***

A9. Please specify what region you live in.

-----

***If A8 is equal to 7 or A8 is equal to 8, then skip to end of questionnaire.***

- A10. What City/Unincorporated areas do you live in? (Choose one)
- 01 Carlsbad
  - 02 Chula Vista
  - 03 Coronado
  - 04 Del Mar
  - 05 El Cajon
  - 06 Encinitas
  - 07 Escondido
  - 08 Imperial Beach
  - 09 La Mesa
  - 10 Lemon Grove
  - 11 National City
  - 12 Oceanside
  - 13 Poway
  - 14 San Diego
  - 15 San Marcos
  - 16 Santee
  - 17 Solana Beach
  - 18 Vista
  - 19 Other
  - 98 Refuse to Answer

***If A10 is not equal to 19, then skip to instruction before A12.***

A11. Please specify other City/Unincorporated areas you live in

-----

***If A7 is equal to 2 then skip to A12***

***If not, then skip to instruction before A14.***

- |                                             |   |                  |
|---------------------------------------------|---|------------------|
| A12. What city do you live in? (Choose one) | 1 | Tijuana          |
|                                             | 2 | Mexicali         |
|                                             | 3 | Ensenada         |
|                                             | 4 | Rosarito         |
|                                             | 5 | Other            |
|                                             | 8 | Refuse to Answer |

***If A12 is not equal to 5, then skip to instruction before A14.***

A13. Please specify other city you live in

-----

***If A12 is not equal to 1, then skip to end of questionnaire.***

***If A7 is equal to 1 then skip to instruction before A14***

***If not, then skip to instruction before A19.***

***If Q4 is equal to 1 then skip to A14***

***If not, then skip to A16.***

- |                                    |   |                  |
|------------------------------------|---|------------------|
| A14. Have you ever been to Mexico? | 1 | Yes              |
|                                    | 0 | No               |
|                                    | 8 | Refuse to Answer |

***If A14 is not equal to 1, then skip to instruction before A19.***

- |                                                                   |                              |
|-------------------------------------------------------------------|------------------------------|
| A15. When was the last time you were in Mexico? ___ / ___ / _____ | mm / dd / yyyy               |
|                                                                   | 2098 Refuse to Answer (Year) |

***If A15 is less than A2 and A15 is not equal to 2098 then READ: "You have indicated that the participant visited Mexico before their date of birth. Please check the response." and skip to A15.***

- A16. Have you ever used any drugs in Mexico?
- |   |                  |
|---|------------------|
| 1 | Yes              |
| 0 | No               |
| 8 | Refuse to Answer |

***If A16 is not equal to 1, then skip to instruction before A19.***

- A17. Have you ever injected drugs in Mexico?
- |   |                  |
|---|------------------|
| 1 | Yes              |
| 0 | No               |
| 8 | Refuse to Answer |

***If A17 is not equal to 1, then skip to instruction before A19.***

- A18. When was the last time you injected drugs in Mexico?

\_\_\_ / \_\_\_ / \_\_\_\_\_ mm / dd / yyyy

2098 Refuse to Answer (Year)

***If A18 is less than A2 and A18 is not equal to 2098 then READ: "You have indicated that the participant injected drugs before their date of birth. Please check the response." and skip to A18.***

***If Q4 is equal to 2 and A7 is equal to 2 then skip to A19***

***If not, then skip to instruction before A24.***

- A19. Have you ever been to the United States?
- |   |                  |
|---|------------------|
| 1 | Yes              |
| 0 | No               |
| 8 | Refuse to Answer |

***If A19 is not equal to 1, then skip to instruction before A24.***

- A20. When was the last time you were in the US? \_\_\_ / \_\_\_ / \_\_\_\_\_ mm / dd / yyyy

2098 Refuse to Answer (Year)

***If A20 is less than A2 and A20 is not equal to 2098 then READ: "You have indicated that the participant visited Mexico before their date of birth. Please check the response." and skip to A20.***

|      |                                         |   |                  |
|------|-----------------------------------------|---|------------------|
| A21. | Have you ever used any drugs in the US? | 1 | Yes              |
|      |                                         | 0 | No               |
|      |                                         | 8 | Refuse to Answer |

***If A21 is not equal to 1, then skip to instruction before A24.***

|      |                                         |   |                  |
|------|-----------------------------------------|---|------------------|
| A22. | Have you ever injected drugs in the US? | 1 | Yes              |
|      |                                         | 0 | No               |
|      |                                         | 8 | Refuse to Answer |

***If A22 is not equal to 1, then skip to instruction before A24.***

|      |                                                      |                   |                         |
|------|------------------------------------------------------|-------------------|-------------------------|
| A23. | When was the last time you injected drugs in the US? |                   |                         |
|      |                                                      | ___ / ___ / _____ | mm / dd / yyyy          |
|      |                                                      | 2098              | Refuse to Answer (Year) |

***If A23 is less than A2 and A23 is not equal to 2098 then READ: "You have indicated that the participant injected drugs in the US before they used drug in the US. Please check the responses." and skip to A23.***

***If A7 is equal to 1 or A12 is equal to 1 and A19 is equal to 1 then skip to A24***

***If not, then skip to instruction before B1.***

|      |                                            |   |                  |
|------|--------------------------------------------|---|------------------|
| A24. | Are you a US citizen or US legal resident? | 1 | Yes              |
|      |                                            | 0 | No               |
|      |                                            | 8 | Refuse to Answer |

***LCOUNTRY = If(A7 is equal to 1, the US, If(A7 is equal to 2, Mexico, )***

***LCITY = If(A8 is equal to 1 or A8 is equal to 2 or A8 is equal to 3 or A8 is equal to 4 or A8 is equal to 5 or A8 is equal to 6, San Diego County, If(A12 is equal to 1, Tijuana, )***

***DT\_SD = If((A8 is equal to 1 or A8 is equal to 2 or A8 is equal to 3 or A8 is equal to 4 or A8 is equal to 5 or A8 is equal to 6) and A16 is equal to 1 and A17 is equal to 1 and A18 is not equal to 2098 and TODAY - A18 is less than 366, 1, 0)***

***NDT\_SD = If(Q4 is equal to 1 and (A8 is equal to 1 or A8 is equal to 2 or A8 is equal to 3 or A8 is equal to 4 or A8 is equal to 5 or A8 is equal to 6) and (A14 is equal to 0 or A14 is equal to 1 and TODAY - A15 is greater than 730), 1, 0)***

***NDT\_TJ = If(Q4 is equal to 2 and A12 is equal to 1 and (A19 is equal to 0 or A19 is equal to 1 and TODAY - A20 is greater than 730), 1, 0)***

***GROUP = If(DT\_SD is equal to 1, 1, If(NDT\_SD is equal to 1, 2, If(NDT\_TJ is equal to 1, 3, 0)))***

***If GROUP is equal to 0, then skip to end of questionnaire.***

## DEMOGRAPHIC DATA

**READ: INTERVIEWER READ TO THE RESPONDENT: Now, I am going to ask you some questions about your life and where you are you from.**

***If A7 is equal to 1 then skip to B1***

***If not, then skip to instruction before B3.***

|     |                      |     |                  |
|-----|----------------------|-----|------------------|
| B1. | What is your height? | ___ | inch             |
|     |                      | 98  | Refuse to Answer |
| B2. | What is your weight? | ___ | lb               |
|     |                      | 998 | Refuse to Answer |

***If A7 is equal to 2 then skip to B3***

***If not, then skip to B5.***

|     |                                             |     |                  |
|-----|---------------------------------------------|-----|------------------|
| B3. | What is your height?                        | ___ | cm               |
|     |                                             | 998 | Refuse to Answer |
| B4. | What is your weight?                        | ___ | kg               |
|     |                                             | 998 | Refuse to Answer |
| B5. | In what country were you born? (Choose one) | 1   | United States    |
|     |                                             | 2   | Mexico           |
|     |                                             | 3   | Other            |
|     |                                             | 7   | Don't Know       |
|     |                                             | 8   | Refuse to Answer |

***If B5 is equal to 2, then skip to B8.***

***If B5 is equal to 1, then skip to B11.***

***If B5 is equal to 7 or B5 is equal to 8, then skip to B15.***



B6. Please specify the other country in which you were born.

-----

B7. Please tell me the state where you were born.

-----

*If 1 is equal to 1, then skip to B15.*

B8. In which state were you born?

**Interviewer: Please select the button that corresponds to the first letter of the state of birthplace.**  
(Choose one)

- 1      A - M
- 2      N - Z
- 8      Refuse to Answer

*If B8 is not equal to 1, then skip to instruction before B10.*

B9. **Interviewer: Please select the correct state of the participant's birthplace.** (Choose one)

- |    |                           |
|----|---------------------------|
| 01 | Aguascalientes (Ags)      |
| 02 | Baja California (BC)      |
| 03 | Baja California Sur (BCS) |
| 04 | Chihuahua (Chih)          |
| 05 | Colima (Col)              |
| 06 | Campeche (Camp)           |
| 07 | Coahuila (Coah)           |
| 08 | Chiapas (Chis)            |
| 09 | Distrito Federal (DF)     |
| 10 | Durango (Dgo)             |
| 11 | Guerrero (Gro)            |
| 12 | Guanajuato (Gto)          |
| 13 | Hidalgo (Hgo)             |
| 14 | Jalisco (Jal)             |
| 15 | Michoacán (Mich)          |
| 16 | Morelos (Mor)             |
| 17 | México (Mex or Edomex)    |
| 98 | Refuse to Answer          |

*If B8 is not equal to 2, then skip to instruction before B11.*

B10. **Interviewer: Please select the correct state of the participant's birthplace.** (Choose one)

- 01 Nayarit (Nay)
- 02 Nuevo León (NL)
- 03 Oaxaca (Oax)
- 04 Puebla (Pue)
- 05 Quintana Roo (Q Roo)
- 06 Querétaro (Qro.)
- 07 Sinaloa (Sin)
- 08 San Luis Potosí (SLP)
- 09 Sonora (Son)
- 10 Tabasco (Tab)
- 11 Tlaxcala (Tlax)
- 12 Tamaulipas (Tamps)
- 13 Veracruz (Ver)
- 14 Yucatán (Yuc)
- 15 Zacatecas (Zac)
- 98 Refuse to Answer

*If 1 is equal to 1, then skip to B15.*

B11. In which state were you born?

**Interviewer: Please select the button that corresponds to the first letter of the state of birthplace.**  
(Choose one)

- 1 A - I
- 2 K - R
- 3 S - Z
- 8 Refuse to Answer

***If B11 is not equal to 1, then skip to instruction before B13.***

**B12. Interviewer: Please select the correct state of the participant's birthplace. (Choose one)**

- 01 Alabama
- 02 Alaska
- 03 Arizona
- 04 Arkansas
- 05 California
- 06 Colorado
- 07 Connecticut
- 08 Delaware
- 09 Florida
- 10 Georgia
- 11 Hawaii
- 12 Idaho
- 13 Illinois
- 14 Indiana
- 15 Iowa
- 98 Refuse to Answer

***If B11 is not equal to 2, then skip to instruction before B14.***

B13. **Interviewer: Please select the correct state of the participant's birthplace.** (Choose one)

- 01 Kansas
- 02 Kentucky
- 03 Louisiana
- 04 Maine
- 05 Maryland
- 06 Massachusetts
- 07 Michigan
- 08 Minnesota
- 09 Mississippi
- 10 Missouri
- 11 Montana
- 12 Nebraska
- 13 Nevada
- 14 New Hampshire
- 15 New Jersey
- 16 New Mexico
- 17 New York
- 18 North Carolina
- 19 North Dakota
- 20 Ohio
- 21 Oklahoma
- 22 Oregon
- 23 Pennsylvania

- 24 Rhode Island
- 98 Refuse to Answer

**If B11 is not equal to 3, then skip to B15.**

**B14. Interviewer: Please select the correct state of the participant's birthplace.** (Choose one)

- 01 South Carolina
- 02 South Dakota
- 03 Tennessee
- 04 Texas
- 05 Utah
- 06 Vermont
- 07 Virginia
- 08 Washington
- 09 Washington, D.C.
- 10 West Virginia
- 11 Wisconsin
- 12 Wyoming
- 98 Refuse to Answer

**B15. Please tell me the city where you were born.**

-----

B16. What kinds of identification do you own? (Check all that apply)

- US birth certificate
- Mexico birth certificate
- Passport
- Senti pass
- Global Entri pass
- Ready Lane pass
- US Tourist visa
- US Work visa
- Credencial de elector (INE) Mexican ID
- US Drivers license
- Other border crossing document
- Other
- None of the above
- Refuse to Answer

***If B16M is equal to 1 and B16A + B16B + B16C + B16D + B16E + B16F + B16G + B16H + B16I + B16J + B16K + B16L is greater than 0 then READ: "You can only choose the response "None of the above" by itself. Please check responses." and skip to B16.***

***If B16L is not equal to 1, then skip to instruction before B18.***

B17. Please, specify other documents

-----

***If B16C is not equal to 1, then skip to instruction before B20.***

B18. What types of passports do you own?  
**Interviewer: any passport is OK, even if not legal.**  
 (Choose one)

- 1 Mexican
- 2 US
- 3 Both
- 4 I dont own a passport
- 5 Other
- 8 Refuse to Answer

*If B18 is not equal to 5, then skip to instruction before B20.*

B19. Please, specify other passport

-----

*If B5 is not equal to 1 and (B18 is equal to 2 or B18 is equal to 3) then skip to B20*

*If not, then skip to B21.*

B20. When did you become a US citizen?  
 Please enter the date of naturalization

\_\_\_ / \_\_\_ / \_\_\_\_\_

mm / dd / yyyy

2098

Refuse to Answer (Year)

*If B20 is less than A2 and B20 is not equal to "skipped" and B20 is not equal to 2098 then READ:  
 "Participant has responded with a length of time greater than his or her age. Please check the responses." and  
 skip to B20.*

B21. Do you consider yourself to be Hispanic/Latino/Mexican?

- 1 Yes
- 0 No
- 8 Refuse to Answer



B22. What racial group or groups do you consider yourself to be?  
**Interviewer: Read out the options and check all that apply** (Check all that apply)

- White
- Black
- Asian
- Native Hawaiian or other Pacific Islander
- Indigenous/ American Indian/ Alaskan Native
- Mixed race
- Other
- Refuse to Answer

*If B22G is not equal to 1, then skip to B24.*

B23. Please specify other racial group

-----

B24. **Interviewer, if necessary, ask: What do you consider your gender to be?**  
 (Choose one)

- 1 Man
- 2 Woman
- 3 Transgender woman or transfeminine
- 4 Transgender man or transmasculine
- 5 Nonbinary
- 6 Other
- 8 Refuse to Answer

*If B24 is not equal to 6, then skip to B26.*

B25. Please specify other gender you consider yours to be

-----

- B26. What sex was listed on your birth certificate? (Choose one)
- 1 Male
  - 2 Female
  - 3 Intersex
  - 8 Refuse to Answer
- B27. What is your marital status? (Choose one)
- 0 Single/ never married
  - 1 Married/common law
  - 2 Divorced
  - 3 Separated
  - 4 Widowed
  - 8 Refuse to Answer
- B28. What is the highest level of schooling you completed? (Choose one)
- 00 None, no formal education
  - 01 Incomplete Primary School
  - 02 Complete Primary School
  - 03 Incomplete Secondary School
  - 04 Complete Secondary School
  - 05 Incomplete Preparatory
  - 06 Complete Preparatory
  - 07 Technical/Trade
  - 08 University/College
  - 09 Other
  - 98 Refuse to Answer

***If B28 is not equal to 9, then skip to instruction before B30.***

B29. Please specify other level of schooling completed.

-----  
***If B28 is equal to 0 or B28 is equal to 98, then skip to instruction before B31.***

B30. Then in total, how many years of education have you completed?

**Interviewer: If participant says Do not know, ask them for their best guess or estimate**

\_\_\_ Years

98 Refuse to Answer

***If B30 is greater than A1 and B30 is not equal to 98 then READ: "The participant has responded that their years of education are greater than their age." and skip to B30.***

B31. In the past 6 months, tell me if you have lived in or slept in any of the following places. **Interviewer:**  
**Read out list and check all that apply** (Check all that apply)

- Parent's house or apartment
- In your own house or apartment
- Your spouse's/sexual partners house or apartment
- Family house or apartment
- Friend's house or apartment
- Migrant worker's camp
- Asylum seekers shelter
- Shelter, welfare residence
- Work place
- Rented room (hotel, motel or other rooming house)
- Car, bus, truck or other vehicle
- Abandoned Building
- Deportee shelter/camp
- Correctional Institution (jail, prison, detention center)
- Drug treatment center
- On the Streets, beach, canal
- Shooting gallery
- Medical care facility (i.e., hospital, hospice, or nursing home)
- Other
- Refuse to Answer

***If B31S is not equal to 1, then skip to instruction before B33.***

B32. Please specify the other place where you slept or lived in the past 6 months.

-----

**If B31A + B31B + B31C + B31D + B31E + B31F + B31G + B31H + B31I + B31J + B31K + B31L + B31M + B31N + B31O + B31P + B31Q + B31R + B31S is equal to 1 or B31 is equal to 98, then skip to B35.**

B33. In the past 6 months, which place did you sleep in most of the time? (Choose one)

- 01 Parent's house or apartment
- 02 In your own house or apartment
- 03 Your spouse's/sexual partners house or apartment
- 04 Family's house or apartment
- 05 Friend's house or apartment
- 06 Migrant worker camp
- 07 Asylum seekers shelter
- 08 Shelter, welfare residence
- 09 Work place
- 10 Rented room (hotel, motel or other rooming house)
- 11 Car, bus, truck or other vehicle
- 12 Abandoned Building
- 13 Deportee shelter/camp
- 14 Correctional Institution (jail, prison, detention center)
- 15 Drug treatment center
- 16 On the Streets, beach, canal
- 17 Shooting gallery
- 18 Medical care facility (i.e., hospital, hospice, or nursing home)
- 19 Other
- 98 Refuse to Answer

*If B33 is equal to 1 and B31A is not equal to 1 or B33 is equal to 2 and B31B is not equal to 1 or B33 is equal to 3 and B31C is not equal to 1 or B33 is equal to 4 and B31D is not equal to 1 or B33 is equal to 5 and B31E is not equal to 1 or B33 is equal to 6 and B31F is not equal to 1 or B33 is equal to 7 and B31G is not equal to 1 or B33 is equal to 8 and B31H is not equal to 1 or B33 is equal to 9 and B31I is not equal to 1 or B33 is equal to 10 and B31J is not equal to 1 or B33 is equal to 11 and B31K is not equal to 1 or B33 is equal to 12 and B31L is not equal to 1 or B33 is equal to 13 and B31M is not equal to 1 or B33 is equal to 14 and B31N is not equal to 1 or B33 is equal to 15 and B31O is not equal to 1 or B33 is equal to 16 and B31P is not equal to 1 or B33 is equal to 17 and B31Q is not equal to 1 or B33 is equal to 18 and B31R is not equal to 1 or B33 is equal to 19 and B31S is not equal to 1 then READ: "Participant could only choose the most often place out of places named before." and skip to B33.*

*If B33 is not equal to 19, then skip to B35.*

B34. Please specify the place where you slept most often in the past 6 months.

-----

B35. Has your housing situation been affected by the COVID/coronavirus pandemic that began in March 2020? (Choose one)

- 1 Yes
- 2 No
- 3 Unsure
- 8 Refuse to Answer

*If B35 is not equal to 1, then skip to B37.*

B36. Is your housing situation better or worse since COVID began? (Choose one)

- 1 Worse
- 2 Better
- 8 Refuse to Answer
- 9 Not Applicable

B37. Approximately, how many people (including yourself) currently live in your household or, if homeless, the place where you stay most often in the last 6 months?

**Interviewer: If the participant lives by itself, enter 1.**

- \_\_\_\_\_ people
- 998 Refuse to Answer

B38. In the past 6 months, on a typical day, how many hours did you spend on the streets? This includes looking for or dealing drugs, other forms of obtaining money, using drugs, and sleeping on the street.

\_\_\_ hours per day  
 98 Refuse to Answer

***If B16A is equal to 1 or B16J is equal to 1 or B18 is equal to 2 or B18 is equal to 3 or A24 is equal to 1 then skip to B39***

***If not, then skip to instruction before B41.***

B39. Have you ever been a member of the US military? 1 Yes  
 0 No  
 8 Refuse to Answer

***If B39 is not equal to 1, then skip to instruction before B41.***

B40. When did you leave the military? \_\_\_ YEARS  
 \_\_\_ MONTHS  
 98 Refuse to Answer (Years)

***If B40 is greater than A1 and B40 is not equal to 98 then READ: "Participant has responded with a length of time greater than his or her age. Please check the responses." and skip to B40.***

B41. In the past six months, what were all your sources of income?  
**Interviewer, please say: Remember your answers are confidential. Read out list and check all that apply.** (Check all that apply)

- \_\_\_ A legal job with pay
- \_\_\_ Informal work/odd jobs
- \_\_\_ Military (Army, Marine, Air force)
- \_\_\_ Running a shooting gallery
- \_\_\_ Selling drugs
- \_\_\_ Prostitution /Sex work
- \_\_\_ Sex work (pimp, manager)
- \_\_\_ Other illegal sources of income
- \_\_\_ Family/friends
- \_\_\_ Other
- \_\_\_ None
- \_\_\_ Refuse to Answer

*If B41K is equal to 1 and B41A + B41B + B41C + B41D + B41E + B41F + B41G + B41H + B41I + B41J is greater than 0 then READ: "You can only choose the response "none" by itself. Please check responses." and skip to B41.*

*If B41H is not equal to 1, then skip to instruction before B43.*

B42. Please specify other illegal sources of income

-----

*If B41J is not equal to 1, then skip to instruction before B44.*

B43. Please specify other source of income.

-----

*If B41A + B41B + B41C + B41D + B41E + B41F + B41G + B41H + B41I + B41J + B41K is equal to 1 or B41 is equal to 98, then skip to B47.*



B44. In the past year, what was your main source of income? (Choose one)

- 01 A legal job with pay
- 02 Informal work/odd jobs
- 03 Military (Army, Marine, Air force)
- 04 Selling drugs
- 05 Running a shooting gallery
- 06 Prostitution /Sex work
- 07 Sex work (pimp, manager)
- 08 Other illegal sources of income
- 09 Family/friends
- 10 Other
- 11 None
- 98 Refuse to Answer

***If B44 is equal to 1 and B41A is not equal to 1 or B44 is equal to 2 and B41B is not equal to 1 or B44 is equal to 3 and B41C is not equal to 1 or B44 is equal to 4 and B41E is not equal to 1 or B44 is equal to 5 and B41D is not equal to 1 or B44 is equal to 6 and B41F is not equal to 1 or B44 is equal to 7 and B41G is not equal to 1 or B44 is equal to 8 and B41H is not equal to 1 or B44 is equal to 9 and B41I is not equal to 1 or B44 is equal to 10 and B41J is not equal to 1 or B44 is equal to 11 and B41K is not equal to 1 then READ: "Participant could only choose the main source of income out of sources named before." and skip to B44.***

***If B44 is not equal to 8, then skip to instruction before B46.***

B45. Please specify other illegal source of income

-----

***If B44 is not equal to 10, then skip to B47.***

B46. Please specify other source of income

-----

- B47. Please, select the type of currency you get your income. (Choose one)
- |   |                  |
|---|------------------|
| 1 | Pesos            |
| 2 | Dollars          |
| 8 | Refuse to Answer |

*If B47 is not equal to 1, then skip to instruction before B49.*

- B48. What was your average monthly income over the **past year**, before taxes, including legal and illegal income in pesos? (Choose one)

- |   |                      |
|---|----------------------|
| 0 | No income            |
| 1 | Less than 1000 pesos |
| 2 | 1000-1499 pesos      |
| 3 | 1500-1999 pesos      |
| 4 | 2000-2499 pesos      |
| 5 | 2500-2999 pesos      |
| 6 | 3000-3499 pesos      |
| 7 | More than 3500 pesos |
| 8 | Refuse to Answer     |

*If B47 is not equal to 2, then skip to B50.*

B49. What was your average monthly income over the **past year**, before taxes, including legal and illegal income in US Dollars? (Choose one)

- 00 No income
- 01 Less than \$500 dollars
- 02 \$500-\$999 dollars
- 03 \$1000-\$1499 dollars
- 04 \$1500-\$1999 dollars
- 05 \$2000-\$2499 dollars
- 06 \$2500-\$2999 dollars
- 07 \$3000-\$3499 dollars
- 08 More than \$3500 dollars
- 98 Refuse to Answer

B50. Has your income level been affected by the COVID/coronavirus pandemic that began in March 2020? (Choose one)

- 1 Yes
- 2 No
- 3 Unsure
- 8 Refuse to Answer

***If B50 is not equal to 1, then skip to instruction before B52.***

B51. Is your income level better or worse since COVID began? (Choose one)

- 1 Worse
- 2 Better
- 8 Refuse to Answer
- 9 Not Applicable



**If B57 is greater than A1 and B57 is not equal to 98 then READ: "Participant has responded with a length of time greater than his or her age. Please check the responses." and skip to B57.**

B58. What was the main reason that you come to Tijuana? (Choose one)

- 0 Looking for work/better life in Tijuana
- 1 Family moved here
- 2 Job relocation/transfer
- 3 To be close to relative
- 4 I was deported to Tijuana
- 5 Other
- 8 Refuse to Answer

**If B58 is not equal to 5, then skip to instruction before B60.**

B59. Please specify the reason why you came to Tijuana.

-----

**If A7 is equal to 1 then skip to B60**

**If not, then skip to instruction before B64.**

B60. Have you lived in San Diego County your whole life?

- 1 Yes
- 0 No
- 8 Refuse to Answer

**If B60 is equal to 1, then skip to instruction before B64.**

B61. How long have you lived in San Diego County?

- \_\_\_ YEARS
- \_\_\_ MONTHS
- \_\_\_ WEEKS
- 98 Refuse to Answer (Years)

**If B61 is greater than A1 and B61 is not equal to 98 then READ: "Participant has responded with a length of time greater than his or her age. Please check the responses." and skip to B61.**

B62. What was the main reason that you moved to San Diego County? (Choose one)

- 0 Looking for work/better life in San Diego
- 1 Family moved here
- 2 Job relocation/transfer
- 3 To be close to relative
- 4 Other
- 8 Refuse to Answer

***If B62 is not equal to 4, then skip to instruction before B64.***

B63. Please specify the reason why you moved to San Diego County.

-----

DRUG USE

**READ: INTERVIEWER READ TO THE RESPONDENT: Now I will ask you some questions about your alcohol and drug use. Some of these questions will ask you for details that can be difficult to remember. Please do your best to give an answer even if it is your best guess. Recall that we will not share your answers with the police or anyone else outside of this study.**

- B64. How often do you have a drink containing alcohol? (Choose one)
- |   |                        |
|---|------------------------|
| 0 | Never                  |
| 1 | Monthly or less        |
| 2 | 2-4 times a month      |
| 3 | 2-3 times a week       |
| 4 | 4 or more times a week |
| 8 | Refuse to Answer       |

***If B64 is equal to 0 or B64 is equal to 8, then skip to B68.***

- B65. How many standard drinks do you have on a typical day when you are drinking? (Choose one)
- |   |                  |
|---|------------------|
| 1 | 1 to 2           |
| 2 | 3 to 4           |
| 3 | 5 to 6           |
| 4 | 7 to 9           |
| 5 | 10 or more       |
| 8 | Refuse to Answer |

***If B26 is equal to 2 or B26 is equal to 3 then skip to B66***

***If not, then skip to instruction before B67.***

B66. How often do you have six or more standard drinks on one occasion? (Choose one)

- 0 Never
- 1 Less than monthly
- 2 Monthly
- 3 Weekly
- 4 Daily or almost daily
- 8 Refuse to Answer

*If B26 is equal to 1 then skip to B67*

*If not, then skip to B68.*

B67. How often do you have eight or more standard drinks on one occasion? (Choose one)

- 0 Never
- 1 Less than monthly
- 2 Monthly
- 3 Weekly
- 4 Daily or almost daily
- 8 Refuse to Answer

B68. Have you ever smoked cigarettes?

- 1 Yes
- 0 No
- 8 Refuse to Answer

*If B68 is not equal to 1, then skip to B73.*

B69. Do you smoke cigarettes now, even a puff?

- 1 Yes
- 0 No
- 8 Refuse to Answer

*If B69 is equal to 0 then skip to B70*



***If not, then skip to B71.***

B70. About how long has it been since you have smoked cigarettes?

**Interviewer: Enter 0 if the response is Less than one year.**

\_\_ \_\_ YEARS

98 Refuse to Answer (Years)

***If B70 is greater than A1 and B70 is not equal to 98 then READ: "That response exceeds the participant's current age. Please check the response." and skip to B70.***

B71. How old were you when you first started smoking cigarettes?

\_\_ \_\_ Years Old

98 Refuse to Answer

***If B71 is greater than A1 and B71 is not equal to 98 then READ: "That response exceeds the participant's current age. Please check the response." and skip to B71.***

***If B69 is equal to 1 then skip to B72***

***If not, then skip to B73.***

B72. How many cigarettes per day do you smoke?

**Interviewer: There are 20 cigarettes in a pack**

\_\_ \_\_ \_\_ cigarettes per day

998 Refuse to Answer

B73. How old were you the first time you used an illegal drug?

\_\_ \_\_ years old

98 Refuse to Answer

***If B73 is greater than A1 then READ: "That response exceeds the participant's current age. Please check the response." and skip to B73.***

B74. What drug did you use the first time you used an illegal drug? (Check all that apply)

- Black tar/Heroin by itself
- Powder heroin by itself
- Cocaine (powder) by itself
- Heroin and cocaine together (speedball)
- Methamphetamine/crystal
- Crack by itself
- China White by itself
- OxyContin, without a prescription
- Other prescription opioids w/o prescription (Vicodin, Darvon, Percocet)
- Tranquilizers (Rivotril, Diazepam, Valium, Ativan or Restoril)
- Barbiturates without a prescription (Amytal, Nembutal, and Seconal)
- Fentanyl
- Another drug or combination that was not already mentioned
- Refuse to Answer

***If B74M is not equal to 1, then skip to B76.***

B75. Please specify another drug or combination:

-----

B76. How old were you when you first injected drugs? \_\_\_\_\_ years old

98 Refuse to Answer

***If B76 is less than B73 and B73 is not equal to 98 or B76 is greater than A1 and B76 is not equal to 98 then READ: "The response is either smaller than the age when the participant used drugs for the first time or exceeds the participant's age. Please check the response." and skip to B76.***

B77. What drug or drug combination did you inject the first time you injected? (Check all that apply)

- Black tar/Heroin by itself
- Powder heroin by itself
- Cocaine (powder) by itself
- Heroin and cocaine together (speedball)
- Methamphetamine/crystal
- Crack by itself
- China White by itself
- OxyContin, without a prescription
- Other prescription opioids w/o prescription (Vicodin, Darvon, Percocet)
- Tranquilizers (Rivotril, Diazepam, Valium, Ativan or Restoril)
- Barbiturates without a prescription (Amytal, Nembutal, and Seconal)
- Fentanyl
- Another drug or combination that was not already mentioned
- Refuse to Answer

***If B77M is not equal to 1, then skip to B79.***

B78. Please specify other drug or combination:

-----

B79. Who did you inject with the first time you injected? (Check all that apply)

- No one (Alone)
- Friend
- Spouse
- Partner
- Brother
- Sister
- Cousin
- Aunt
- Uncle
- Sexual partner other than spouse/partner
- Acquaintance
- Stranger
- Other
- Refuse to Answer

***If B79A is equal to 1 and B79B + B79C + B79D + B79E + B79F + B79G + B79H + B79I + B79J + B79K + B79L + B79M is greater than 0 then READ: "You can only choose the response "alone" by itself. Please check responses." and skip to B79.***

***If B79M is not equal to 1, then skip to instruction before B81.***

B80. Please specify other person:

-----

***READ: INTERVIEWER READ TO THE RESPONDENT: Now, I am going to ask you about different drugs you have used in [LCOUNTRY], your home country. Please tell me if you have ever used any of these drugs in the last 6 months. If you were in prison/jail in the past 6 months please think of the time when you've been outside prison/jail to answer these questions.***

B81. Have you ever smoked or vaped marijuana or hashish by itself in [LCOUNTRY]?

- |   |                  |
|---|------------------|
| 1 | Yes              |
| 0 | No               |
| 8 | Refuse to Answer |

***If B81 is not equal to 1, then skip to B86.***

B82. How old were you when you first smoked or vaped marijuana or hashish by itself?

- |       |                  |
|-------|------------------|
| __ __ | Years Old        |
| 98    | Refuse to Answer |

***If B82 is less than B73 or B82 is greater than A1 and B82 is not equal to 98 then READ: "The response is either smaller than the age when the participant used drugs for the first time or exceeds the participant's age. Please check the response." and skip to B82.***

B83. During the last 6 months, on average how often have you smoked marijuana or hashish by itself in [LCOUNTRY]? (Choose one)

- |    |                            |
|----|----------------------------|
| 00 | Never                      |
| 01 | One time per month or less |
| 02 | 2 to 3 days per month      |
| 03 | One time per week          |
| 04 | 2 to 3 days per week       |
| 05 | 4 to 6 days per week       |
| 06 | One time per day           |
| 07 | 2-3 times per day          |
| 08 | 4 times or more per day    |
| 98 | Refuse to Answer           |

B84. Have you ever vaped marijuana or hashish by itself?

- |   |                  |
|---|------------------|
| 1 | Yes              |
| 0 | No               |
| 8 | Refuse to Answer |

***If B84 is not equal to 1, then skip to B86.***

B85. During the last 6 months, on average how often have you vaped marijuana or hashish by itself in [LCOUNTRY]? (Choose one)

- 00 Never
- 01 One time per month or less
- 02 2 to 3 days per month
- 03 One time per week
- 04 2 to 3 days per week
- 05 4 to 6 days per week
- 06 One time per day
- 07 2-3 times per day
- 08 4 times or more per day
- 98 Refuse to Answer

B86. Have you ever used heroin?

- 1 Yes
- 0 No
- 8 Refuse to Answer

***If B86 is not equal to 1, then skip to B100.***

B87. Have you ever smoked, snorted, or inhaled heroin?

- 1 Yes
- 0 No
- 8 Refuse to Answer

***If B87 is not equal to 1, then skip to B90.***

B88. How old were you when you first smoked, snorted, or inhaled heroin? \_\_\_ Years old

- 98 Refuse to Answer

***If B88 is less than B73 or B88 is greater than A1 and B88 is not equal to 98 then READ: "The response is either smaller than the age when the participant used drugs for the first time or exceeds the participant's age. Please check the response." and skip to B88.***

B89. During the last 6 months, on average how often have you smoked, snorted, or inhaled heroin in [LCOUNTRY]? (Choose one)

- |    |                            |
|----|----------------------------|
| 00 | Never                      |
| 01 | One time per month or less |
| 02 | 2 to 3 days per month      |
| 03 | One time per week          |
| 04 | 2 to 3 days per week       |
| 05 | 4 to 6 days per week       |
| 06 | One time per day           |
| 07 | 2-3 times per day          |
| 08 | 4 times or more per day    |
| 98 | Refuse to Answer           |

B90. Have you ever injected heroin by itself?

- |   |                  |
|---|------------------|
| 1 | Yes              |
| 0 | No               |
| 8 | Refuse to Answer |

*If B90 is not equal to 1, then skip to instruction before B93.*

B91. How old were you when you first injected heroin by itself?

- |       |                  |
|-------|------------------|
| __ __ | Years Old        |
| 98    | Refuse to Answer |

*If B91 is less than B76 or B91 is greater than A1 and B91 is not equal to 98 then READ: "The response is either smaller than the age when the participant inject drugs for the first time or exceeds the participant's age. Please check the response." and skip to B91.*

B92. During the last 6 months, on average how often have you injected heroin by itself in [LCOUNTRY]?  
(Choose one)

- |    |                            |
|----|----------------------------|
| 00 | Never                      |
| 01 | One time per month or less |
| 02 | 2 to 3 days per month      |
| 03 | One time per week          |
| 04 | 2 to 3 days per week       |
| 05 | 4 to 6 days per week       |
| 06 | One time per day           |
| 07 | 2-3 times per day          |
| 08 | 4 times or more per day    |
| 98 | Refuse to Answer           |

*If (B89 is equal to 0 or B89 is equal to 98 or B89 is equal to "skipped") and (B92 is equal to 0 or B92 is equal to 98 or B92 is equal to "skipped"), then skip to B100.*

B93. In the last 6 months, when you used heroin in [LCOUNTRY] what colors did it come in? **Interviewer:**  
**Read out the options and check all that apply**  
(Check all that apply)

- |     |                  |
|-----|------------------|
| ___ | Black tar        |
| ___ | Brown powder     |
| ___ | White powder     |
| ___ | Yellow powder    |
| ___ | Orange powder    |
| ___ | Other            |
| ___ | Refuse to Answer |

*If B93F is not equal to 1, then skip to instruction before B95.*



B94. Please, specify the color of the heroin you used.

-----

***If B92 is equal to 0 or B92 is equal to 98 or B92 is equal to "skipped", then skip to B100.***

B95. In the last 6 months, when you injected heroin in [LCOUNTRY], what color was it **most often**?  
(Choose one)

- |   |                  |
|---|------------------|
| 1 | Black tar        |
| 2 | Brown powder     |
| 3 | White powder     |
| 4 | Yellow powder    |
| 5 | Orange powder    |
| 6 | Other            |
| 8 | Refuse to Answer |

***If B95 is not equal to 6, then skip to instruction before B97.***

B96. Please, specify the color of the heroin you used.

-----

***If B95 is not equal to 4, then skip to instruction before B98.***

B97. During the last 6 months when you injected heroin in [LCOUNTRY], on average how often was it **yellow**? (Choose one)

- |   |                         |
|---|-------------------------|
| 1 | Never                   |
| 2 | Less than half the time |
| 3 | About half of the time  |
| 4 | More than half the time |
| 5 | Always                  |
| 8 | Refuse to Answer        |

***If B95 is not equal to 5, then skip to instruction before B99.***

B98. During the last 6 months when you injected heroin in [LCOUNTRY], on average how often was it *orange*? (Choose one)

- |   |                         |
|---|-------------------------|
| 1 | Never                   |
| 2 | Less than half the time |
| 3 | About half of the time  |
| 4 | More than half the time |
| 5 | Always                  |
| 8 | Refuse to Answer        |

***If B95 is not equal to 6, then skip to B100.***

B99. During the last 6 months when you injected heroin in [LCOUNTRY], on average how often was it [Response to B96]? (Choose one)

- |   |                         |
|---|-------------------------|
| 1 | Never                   |
| 2 | Less than half the time |
| 3 | About half of the time  |
| 4 | More than half the time |
| 5 | Always                  |
| 8 | Refuse to Answer        |

B100. Have you ever used cocaine or crack?

- |   |                  |
|---|------------------|
| 1 | Yes              |
| 0 | No               |
| 8 | Refuse to Answer |

***If B100 is not equal to 1, then skip to B111.***

B101. Have you ever smoked, snorted, or inhaled crack or powder cocaine?

- |   |                  |
|---|------------------|
| 1 | Yes              |
| 0 | No               |
| 8 | Refuse to Answer |

***If B101 is not equal to 1, then skip to B104.***

B102. How old were you when you first smoked, snorted, or inhaled crack or powder cocaine?

\_\_\_ \_\_\_ Years Old  
98 Refuse to Answer

***If B102 is less than B73 or B102 is greater than A1 and B102 is not equal to 98 then READ: "The response is either smaller than the age when the participant used drugs for the first time or exceeds the participant's age. Please check the response." and skip to B102.***

B103. During the last 6 months, on average how often have you smoked, snorted, or inhaled crack or powder cocaine in [LCOUNTRY]? (Choose one)

00 Never  
01 One time per month or less  
02 2 to 3 days per month  
03 One time per week  
04 2 to 3 days per week  
05 4 to 6 days per week  
06 One time per day  
07 2-3 times per day  
08 4 times or more per day  
98 Refuse to Answer

B104. Have you ever injected cocaine by itself?

1 Yes  
0 No  
8 Refuse to Answer

***If B104 is not equal to 1, then skip to instruction before B107.***

B105. How old were you when you first injected cocaine by itself?

\_\_\_ \_\_\_ Years Old  
98 Refuse to Answer

***If B105 is less than B76 or B105 is greater than A1 and B105 is not equal to 98 then READ: "The response is either smaller than the age when the participant inject drugs for the first time or exceeds the participant's age. Please check the response." and skip to B105.***

B106. During the last 6 months, on average how often have you injected cocaine by itself in [LCOUNTRY]?  
(Choose one)

- 00 Never
- 01 One time per month or less
- 02 2 to 3 days per month
- 03 One time per week
- 04 2 to 3 days per week
- 05 4 to 6 days per week
- 06 One time per day
- 07 2-3 times per day
- 08 4 times or more per day
- 98 Refuse to Answer

***If B86 is not equal to 1, then skip to B111.***

B107. Have you ever injected heroin/black tar and cocaine together (speedball)?

- 1 Yes
- 0 No
- 8 Refuse to Answer

***If B107 is not equal to 1, then skip to B111.***

B108. How old were you when you first injected heroin and cocaine together (speedball)?

\_\_\_ \_\_\_ Years Old

98 Refuse to Answer

***If B108 is less than B76 or B108 is greater than A1 and B108 is not equal to 98 then READ: "The response is either smaller than the age when the participant inject drugs for the first time or exceeds the participant's age. Please check the response." and skip to B108.***

B109. During the last 6 months, on average how often have you injected heroin and cocaine together (speedball) in [LCOUNTRY]? (Choose one)

- |    |                            |
|----|----------------------------|
| 00 | Never                      |
| 01 | One time per month or less |
| 02 | 2 to 3 days per month      |
| 03 | One time per week          |
| 04 | 2 to 3 days per week       |
| 05 | 4 to 6 days per week       |
| 06 | One time per day           |
| 07 | 2-3 times per day          |
| 08 | 4 times or more per day    |
| 98 | Refuse to Answer           |

***If B109 is equal to 0 or B109 is equal to 98, then skip to B111.***

B110. Over the last 6 months, how many times a day on average did you inject heroin and cocaine together (speedball)?

**Interviewer: If the participant says Do not Know ask them for their best guess or estimate**

- |     |                  |
|-----|------------------|
| — — | times a day      |
| 97  | Don't Know       |
| 98  | Refuse to Answer |

B111. Have you ever used methamphetamine/crystal?

- |   |                  |
|---|------------------|
| 1 | Yes              |
| 0 | No               |
| 8 | Refuse to Answer |

***If B111 is not equal to 1, then skip to B128.***

B112. Have you ever smoked, snorted, inhaled, or vaped meth/crystal by itself?

- |   |                  |
|---|------------------|
| 1 | Yes              |
| 0 | No               |
| 8 | Refuse to Answer |

***If B112 is not equal to 1, then skip to B115.***

B113. How old were you when you first smoked, snorted, inhaled, or vaped meth/crystal?

\_\_\_ \_\_\_ Years Old

98 Refuse to Answer

***If B113 is less than B73 or B113 is greater than A1 and B113 is not equal to 98 then READ: "The response is either smaller than the age when the participant used drugs for the first time or exceeds the participant's age. Please check the response." and skip to B113.***

B114. During the last 6 months, on average how often have you smoked, snorted, inhaled, or vaped meth/crystal in [LCOUNTRY]? (Choose one)

00 Never

01 One time per month or less

02 2 to 3 days per month

03 One time per week

04 2 to 3 days per week

05 4 to 6 days per week

06 One time per day

07 2-3 times per day

08 4 times or more per day

98 Refuse to Answer

B115. Have you ever injected meth/crystal by itself?

1 Yes

0 No

8 Refuse to Answer

***If B115 is not equal to 1, then skip to instruction before B122.***

B116. How old were you when you first injected meth/crystal by itself?

\_\_\_ \_\_\_ Years Old

98 Refuse to Answer

***If B116 is less than B76 or B116 is greater than A1 and B116 is not equal to 98 then READ: "The response is either smaller than the age when the participant inject drugs for the first time or exceeds the participant's age. Please check the response." and skip to B116.***

B117. During the last 6 months, on average how often have you injected meth/crystal by itself in [LCOUNTRY]? (Choose one)

- 00 Never
- 01 One time per month or less
- 02 2 to 3 days per month
- 03 One time per week
- 04 2 to 3 days per week
- 05 4 to 6 days per week
- 06 One time per day
- 07 2-3 times per day
- 08 4 times or more per day
- 98 Refuse to Answer

***If B117 is equal to 0 or B117 is equal to 98, then skip to instruction before B122.***

B118. In the last 6 months when you injected methamphetamine (by itself or in combination with other drugs) in [LCOUNTRY], what colors was it? (Check all that apply)

- White
- Pink
- Green
- Black
- Yellow
- Clear (ice)
- Other
- Refuse to Answer

***If B118G is not equal to 1, then skip to instruction before B120.***

B119. Please, specify the color of methamphetamine

-----

***If B118A + B118B + B118C + B118D + B118E + B118F + B118G is equal to 1 or B118 is equal to 8, then skip to instruction before B122.***

B120. In the last 6 months when you injected methamphetamine in [LCOUNTRY], what colors was it most often? (Choose one)

- 1 White
- 2 Pink
- 3 Green
- 4 Black
- 5 Yellow
- 6 Clear (ice)
- 7 Other
- 8 Refuse to Answer

***If B120 is equal to 1 and B118A is not equal to 1 or B120 is equal to 2 and B118B is not equal to 1 or B120 is equal to 3 and B118C is not equal to 1 or B120 is equal to 4 and B118D is not equal to 1 or B120 is equal to 5 and B118E is not equal to 1 or B120 is equal to 6 and B118F is not equal to 1 or B120 is equal to 7 and B118G is not equal to 1 then READ: "Participant could only choose the most often color out of colors named before." and skip to B120.***

***If B120 is not equal to 7, then skip to instruction before B122.***

B121. Please, specify the color of methamphetamine

-----

***If B100 is not equal to 1, then skip to instruction before B125.***

B122. Have you ever injected meth/crystal and cocaine together?

- 1 Yes
- 0 No
- 8 Refuse to Answer



***If B122 is not equal to 1, then skip to instruction before B125.***

B123. How old were you when you first injected meth/crystal and cocaine together?

- \_\_\_ \_\_\_ Years Old
- 98 Refuse to Answer

***If B123 is less than B76 or B123 is greater than A1 and B123 is not equal to 98 then READ: "The response is either smaller than the age when the participant inject drugs for the first time or exceeds the participant's age. Please check the response." and skip to B123.***

B124. During the last 6 months, on average how often have you injected meth/crystal and cocaine together in [LCOUNTRY]? (Choose one)

- 00 Never
- 01 One time per month or less
- 02 2 to 3 days per month
- 03 One time per week
- 04 2 to 3 days per week
- 05 4 to 6 days per week
- 06 One time per day
- 07 2-3 times per day
- 08 4 times or more per day
- 98 Refuse to Answer

***If B86 is not equal to 1, then skip to B128.***

B125. Have you ever injected meth/crystal and heroin/black tar together?

- 1 Yes
- 0 No
- 8 Refuse to Answer

***If B125 is not equal to 1, then skip to B128.***

B126. How old were you when you first injected meth/crystal and heroin together?

\_\_\_ \_\_\_      Years Old  
 98      Refuse to Answer

***If B126 is less than B76 or B126 is greater than A1 and B126 is not equal to 98 then READ: "The response is either smaller than the age when the participant inject drugs for the first time or exceeds the participant's age. Please check the response." and skip to B126.***

B127. During the last 6 months, on average how often have you injected meth/crystal and heroin together in [LCOUNTRY]? (Choose one)

|    |                            |
|----|----------------------------|
| 00 | Never                      |
| 01 | One time per month or less |
| 02 | 2 to 3 days per month      |
| 03 | One time per week          |
| 04 | 2 to 3 days per week       |
| 05 | 4 to 6 days per week       |
| 06 | One time per day           |
| 07 | 2-3 times per day          |
| 08 | 4 times or more per day    |
| 98 | Refuse to Answer           |

B128. What type(s) of drugs do you think are in China White? (Check all that apply)

- Heroin
- Fentanyl
- Oxycontin
- Prescription opioids (Vicodin, Darvon, Percocet)
- Methamphetamine
- Cocaine
- Crocodile
- Barbiturates
- Cutting agents (e.g., baking soda, baby powder, powdered milk, caffeine, etc)
- Poison
- Other
- Don't Know
- Refuse to Answer

***If B128K is not equal to 1, then skip to instruction before B130.***

B129. Please, specify what type of drug or combination do you think China White is.

-----

***If B128B is equal to 1, then skip to B140.***

- |                                       |   |                  |
|---------------------------------------|---|------------------|
| B130. Have you ever used China White? | 1 | Yes              |
|                                       | 0 | No               |
|                                       | 8 | Refuse to Answer |

***If B130 is not equal to 1, then skip to B140.***

- B131. Have you ever smoked, snorted, inhaled or vaped China White?
- |   |                  |
|---|------------------|
| 1 | Yes              |
| 0 | No               |
| 8 | Refuse to Answer |

***If B131 is not equal to 1, then skip to B134.***

- B132. How old were you when you first smoked, snorted, inhaled or vaped China White?
- |     |                  |
|-----|------------------|
| — — | Years Old        |
| 98  | Refuse to Answer |

***If B132 is less than B73 or B132 is greater than A1 and B132 is not equal to 98 then READ: "The response is either smaller than the age when the participant used drugs for the first time or exceeds the participant's age. Please check the response." and skip to B132.***

- B133. During the last 6 months, on average how often have you smoked, snorted, inhaled Chine White in [LCOUNTRY]? (Choose one)
- |    |                            |
|----|----------------------------|
| 00 | Never                      |
| 01 | One time per month or less |
| 02 | 2 to 3 days per month      |
| 03 | One time per week          |
| 04 | 2 to 3 days per week       |
| 05 | 4 to 6 days per week       |
| 06 | One time per day           |
| 07 | 2-3 times per day          |
| 08 | 4 times or more per day    |
| 98 | Refuse to Answer           |

- B134. Have you ever injected China White by itself?
- |   |                  |
|---|------------------|
| 1 | Yes              |
| 0 | No               |
| 8 | Refuse to Answer |

***If B134 is not equal to 1, then skip to instruction before B137.***



***If B138 is less than B76 or B138 is greater than A1 and B138 is not equal to 98 then READ: "The response is either smaller than the age when the participant inject drugs for the first time or exceeds the participant's age. Please check the response." and skip to B138.***

B139. During the last 6 months, on average how often have you injected China White and Meth/Crystal together in [LCOUNTRY]? (Choose one)

- 00 Never
- 01 One time per month or less
- 02 2 to 3 days per month
- 03 One time per week
- 04 2 to 3 days per week
- 05 4 to 6 days per week
- 06 One time per day
- 07 2-3 times per day
- 08 4 times or more per day
- 98 Refuse to Answer

B140. Have you ever used Fentanyl?

- 1 Yes
- 0 No
- 7 Don't Know
- 8 Refuse to Answer

***If B140 is not equal to 1, then skip to B154.***

B141. Have you ever smoked, inhaled snorted or vaped Fentanyl ?

- 1 Yes
- 0 No
- 8 Refuse to Answer

***If B141 is not equal to 1, then skip to B144.***

B142. How old were you when you first smoked, inhaled snorted or vaped Fentanyl?

\_\_\_ \_\_\_      Years old  
 98            Refuse to Answer

***If B142 is less than B73 or B142 is greater than A1 and B142 is not equal to 98 then READ: "The response is either smaller than the age when the participant used drugs for the first time or exceeds the participant's age. Please check the response." and skip to B142.***

B143. During the last 6 months, on average how often have you smoked, inhaled snorted or vaped Fentanyl in [LCOUNTRY]? (Choose one)

00      Never  
 01      One time per month or less  
 02      2 to 3 days per month  
 03      One time per week  
 04      2 to 3 days per week  
 05      4 to 6 days per week  
 06      One time per day  
 07      2-3 times per day  
 08      4 times or more per day  
 98      Refuse to Answer

B144. Have you ever injected Fentanyl by itself?

1      Yes  
 0      No  
 8      Refuse to Answer

***If B144 is not equal to 1, then skip to instruction before B151.***

B145. How old were you when you first injected Fentanyl by itself?

\_\_\_ \_\_\_      Years Old  
 98            Refuse to Answer

***If B145 is less than B76 or B145 is greater than A1 and B145 is not equal to 98 then READ: "The response is either smaller than the age when the participant inject drugs for the first time or exceeds the participant's age. Please check the response." and skip to B145.***

B146. During the last 6 months, on average how often have you injected Fentanyl by itself in [LCOUNTRY]?  
(Choose one)

- 00 Never
- 01 One time per month or less
- 02 2 to 3 days per month
- 03 One time per week
- 04 2 to 3 days per week
- 05 4 to 6 days per week
- 06 One time per day
- 07 2-3 times per day
- 08 4 times or more per day
- 98 Refuse to Answer

***If B146 is equal to 0 or B146 is equal to 98 or B146 is equal to "skipped", then skip to instruction before B151.***

B147. In the last 6 months when you injected Fentanyl (by itself or in combination with other drugs) in [LCOUNTRY], what colors was it? (Check all that apply)

- White
- Yellow
- Orange
- Brown
- Blue
- Other
- Refuse to Answer

***If B147F is not equal to 1, then skip to instruction before B149.***

B148. Please, specify the color of Fentanyl

-----



**If B147A + B147B + B147C + B147D + B147E + B147F is equal to 1 or B147 is equal to 8, then skip to instruction before B151.**

B149. In the last 6 months when you injected Fentanyl in [LCOUNTRY], what colors was it most often?  
(Choose one)

- 1 White
- 2 Yellow
- 3 Orange
- 4 Brown
- 5 Blue
- 6 Other
- 8 Refuse to Answer

**If B149 is equal to 1 and B147A is not equal to 1 or B149 is equal to 2 and B147B is not equal to 1 or B149 is equal to 3 and B147C is not equal to 1 or B149 is equal to 4 and B147D is not equal to 1 or B149 is equal to 5 and B147E is not equal to 1 or B149 is equal to 6 and B147F is not equal to 1 then READ: "Participant could only choose the most often color out of colors named before." and skip to B149.**

**If B149 is not equal to 6, then skip to instruction before B151.**

B150. Please, specify the color of Fentanyl

-----

**If B111 is not equal to 1, then skip to B154.**

- B151. Have you ever injected fentanyl and meth/crystal together?
- 1 Yes
  - 0 No
  - 8 Refuse to Answer

**If B151 is not equal to 1, then skip to B154.**

B152. How old were you when you first injected fentanyl and meth/crystal together?

- \_\_\_ Years Old
- 98 Refuse to Answer

***If B152 is less than B76 or B152 is greater than A1 and B152 is not equal to 98 then READ: "The response is either smaller than the age when the participant inject drugs for the first time or exceeds the participant's age. Please check the response." and skip to B152.***

B153. During the last 6 months, on average how often have you injected fentanyl and meth/crystal together in [LCOUNTRY]? (Choose one)

- 00 Never
- 01 One time per month or less
- 02 2 to 3 days per month
- 03 One time per week
- 04 2 to 3 days per week
- 05 4 to 6 days per week
- 06 One time per day
- 07 2-3 times per day
- 08 4 times or more per day
- 98 Refuse to Answer

B154. Have you ever used PCP/Angel Dust?

- 1 Yes
- 0 No
- 8 Refuse to Answer

***If B154 is not equal to 1, then skip to B158.***

B155. Have you ever smoked or inhaled PCP/Angel Dust?

- 1 Yes
- 0 No
- 8 Refuse to Answer

***If B155 is not equal to 1, then skip to B158.***

B156. How old were you when you first smoked or inhaled PCP/Angel Dust?

- \_\_\_ Years Old
- 98 Refuse to Answer

**If B156 is less than B73 or B156 is greater than A1 and B156 is not equal to 98 then READ: "The response is either smaller than the age when the participant used drugs for the first time or exceeds the participant's age. Please check the response." and skip to B156.**

B157. During the last 6 months, on average how often have you smoked or inhaled PCP/Angel Dust in [LCOUNTRY]? (Choose one)

- |    |                            |
|----|----------------------------|
| 00 | Never                      |
| 01 | One time per month or less |
| 02 | 2 to 3 days per month      |
| 03 | One time per week          |
| 04 | 2 to 3 days per week       |
| 05 | 4 to 6 days per week       |
| 06 | One time per day           |
| 07 | 2-3 times per day          |
| 08 | 4 times or more per day    |
| 98 | Refuse to Answer           |

B158. Have you ever used Ecstasy?

- |   |                  |
|---|------------------|
| 1 | Yes              |
| 0 | No               |
| 8 | Refuse to Answer |

**If B158 is not equal to 1, then skip to B166.**

B159. How old were you when you first used Ecstasy?

- |     |                  |
|-----|------------------|
| ___ | Years Old        |
| 98  | Refuse to Answer |

**If B159 is less than B73 or B159 is greater than A1 and B159 is not equal to 98 then READ: "The response is either smaller than the age when the participant used drugs for the first time or exceeds the participant's age. Please check the response." and skip to B159.**

B160. Have you ever injected Ecstasy?

- |   |                  |
|---|------------------|
| 1 | Yes              |
| 0 | No               |
| 8 | Refuse to Answer |



B164. During the last 6 months when you used ecstasy in the US, on average how often did you inject it in [LCOUNTRY]? (Choose one)

- 00 Never
- 01 One time per month or less
- 02 2 to 3 days per month
- 03 One time per week
- 04 2 to 3 days per week
- 05 4 to 6 days per week
- 06 One time per day
- 07 2-3 times per day
- 08 4 times or more per day
- 98 Refuse to Answer

***If B162H is equal to 1 or B162 is equal to 9, then skip to B166.***

B165. During the last 6 months when you used ecstasy in the US, on average how often did you use it in other ways (not injecting) in [LCOUNTRY]? (Choose one)

- 00 Never
- 01 One time per month or less
- 02 2 to 3 days per month
- 03 One time per week
- 04 2 to 3 days per week
- 05 4 to 6 days per week
- 06 One time per day
- 07 2-3 times per day
- 08 4 times or more per day
- 98 Refuse to Answer

B166. Have you ever used Ketamine (Special K, K)?

|   |                  |
|---|------------------|
| 1 | Yes              |
| 0 | No               |
| 8 | Refuse to Answer |

*If B166 is not equal to 1, then skip to B174.*

B167. How old were you when you first used Ketamine?

|     |                  |
|-----|------------------|
| ___ | Years Old        |
| 98  | Refuse to Answer |

*If B167 is less than B73 or B167 is greater than A1 and B167 is not equal to 98 then READ: "The response is either smaller than the age when the participant used drugs for the first time or exceeds the participant's age. Please check the response." and skip to B167.*

B168. Have you ever injected Ketamine?

|   |                  |
|---|------------------|
| 1 | Yes              |
| 0 | No               |
| 8 | Refuse to Answer |

*If B168 is not equal to 1, then skip to B170.*

B169. How old were you when you first injected Ketamine?

|     |                  |
|-----|------------------|
| ___ | Years Old        |
| 98  | Refuse to Answer |

*If B169 is less than B76 or B169 is greater than A1 and B169 is not equal to 98 then READ: "The response is either smaller than the age when the participant inject drugs for the first time or exceeds the participant's age. Please check the response." and skip to B169.*

B170. If you used ketamine in the last 6 months in [LCOUNTRY], how did you use it?

**Interviewer: If the participant indicates that they did not use ketamine in [LCOUNTRY] in the past 6 months, then check Not Applicable (Check all that apply)**

- Injecting
- Smoking/chasing
- Snorting
- Inhaling
- Swallowing
- Rectally/bumping
- Other
- Not Applicable
- Refuse to Answer

***If B170 is greater than 1 and B170H is equal to 1 then READ: "You can only choose the response "Not Applicable" by itself. Please check responses." and skip to B170.***

***If B170G is not equal to 1, then skip to instruction before B172.***

B171. Please, specify what other way you used Ketamine in the last 6 months.

-----

***If B170A is not equal to 1, then skip to instruction before B173.***

B172. During the last 6 months, on average how often have you injected Ketamine in [LCOUNTRY]?  
(Choose one)

- 00 Never
- 01 One time per month or less
- 02 2 to 3 days per month
- 03 One time per week
- 04 2 to 3 days per week
- 05 4 to 6 days per week
- 06 One time per day
- 07 2-3 times per day
- 08 4 times or more per day
- 98 Refuse to Answer
- 09 Not Applicable

***If B170H is equal to 1 or B170 is equal to 98, then skip to B174.***



B173. During the last 6 months when you used Ketamine in the US, on average how often did you use it in other ways (not injecting) in [LCOUNTRY]? (Choose one)

- 00 Never
- 01 One time per month or less
- 02 2 to 3 days per month
- 03 One time per week
- 04 2 to 3 days per week
- 05 4 to 6 days per week
- 06 One time per day
- 07 2-3 times per day
- 08 4 times or more per day
- 98 Refuse to Answer
- 09 Not Applicable

B174. Have you ever used OxyContin?

- 1 Yes
- 0 No
- 8 Refuse to Answer

***If B174 is not equal to 1, then skip to B182.***

B175. How old were you when you first used OxyContin?

- \_\_\_ Years Old
- 98 Refuse to Answer

***If B175 is less than B73 or B175 is greater than A1 and B175 is not equal to 98 then READ: "The response is either smaller than the age when the participant used drugs for the first time or exceeds the participant's age. Please check the response." and skip to B175.***

B176. Have you ever injected OxyContin?

- 1 Yes
- 0 No
- 8 Refuse to Answer

***If B176 is not equal to 1, then skip to B178.***



B180. During the last 6 months, on average how often have you injected OxyContin in [LCOUNTRY]?  
(Choose one)

- 00 Never
- 01 One time per month or less
- 02 2 to 3 days per month
- 03 One time per week
- 04 2 to 3 days per week
- 05 4 to 6 days per week
- 06 One time per day
- 07 2-3 times per day
- 08 4 times or more per day
- 98 Refuse to Answer
- 09 Not Applicable

***If B178H is equal to 1 or B178 is equal to 98, then skip to B182.***

B181. During the last 6 months, on average how often have you used (not injecting) OxyContin in [LCOUNTRY]? (Choose one)

- |    |                            |
|----|----------------------------|
| 00 | Never                      |
| 01 | One time per month or less |
| 02 | 2 to 3 days per month      |
| 03 | One time per week          |
| 04 | 2 to 3 days per week       |
| 05 | 4 to 6 days per week       |
| 06 | One time per day           |
| 07 | 2-3 times per day          |
| 08 | 4 times or more per day    |
| 98 | Refuse to Answer           |
| 09 | Not Applicable             |

B182. Have you ever used other prescription opioids (Vicodin, Darvon, Percocet)?

- |   |                  |
|---|------------------|
| 1 | Yes              |
| 0 | No               |
| 8 | Refuse to Answer |

***If B182 is not equal to 1, then skip to B190.***

B183. How old were you when you first used other prescription opioids (Vicodin, Darvon, Percocet)?

- |       |                  |
|-------|------------------|
| __ __ | Years Old        |
| 98    | Refuse to Answer |

***If B183 is less than B73 or B183 is greater than A1 and B183 is not equal to 98 then READ: "The response is either smaller than the age when the participant used drugs for the first time or exceeds the participant's age. Please check the response." and skip to B183.***

B184. Have you ever injected other prescription opioids (Vicodin, Darvon, Percocet) ?

- 1 Yes
- 0 No
- 8 Refuse to Answer

***If B184 is not equal to 1, then skip to B186.***

B185. How old were you when you first injected other prescription opioids (Vicodin, Darvon, Percocet) ?

- \_\_\_ Years Old
- 98 Refuse to Answer

***If B185 is less than B76 or B185 is greater than A1 and B185 is not equal to 98 then READ: "The response is either smaller than the age when the participant inject drugs for the first time or exceeds the participant's age. Please check the response." and skip to B185.***

B186. If you used other prescription opioids (Vicodin, Darvon, Percocet) in the last 6 months in [LCOUNTRY], how did you use it?

**Interviewer: If the participant indicates that they did not use other prescription opioids in [LCOUNTRY] in the past 6 months, then check Not Applicable (Check all that apply)**

- \_\_\_ Injecting
- \_\_\_ Smoking/chasing
- \_\_\_ Snorting
- \_\_\_ Inhaling
- \_\_\_ Swallowing
- \_\_\_ Rectally/bumping
- \_\_\_ Other
- \_\_\_ Not Applicable
- \_\_\_ Refuse to Answer

***If B186 is greater than 1 and B186H is equal to 1 then READ: "You can only choose the response "Not Applicable" by itself. Please check responses." and skip to B186.***

***If B186G is not equal to 1, then skip to instruction before B188.***

B187. Please, specify what other way you used prescription opioids (Vicodin, Darvon, Percocet) in the last 6 months.

---

***If B186A is not equal to 1, then skip to instruction before B189.***

B188. During the last 6 months, on average how often have you injected other prescription opioids (Vicodin, Darvon, Percocet) in [LCOUNTRY]? (Choose one)

- |    |                            |
|----|----------------------------|
| 00 | Never                      |
| 01 | One time per month or less |
| 02 | 2 to 3 days per month      |
| 03 | One time per week          |
| 04 | 2 to 3 days per week       |
| 05 | 4 to 6 days per week       |
| 06 | One time per day           |
| 07 | 2-3 times per day          |
| 08 | 4 times or more per day    |
| 98 | Refuse to Answer           |
| 09 | Not Applicable             |

***If B186H is equal to 1 or B186 is equal to 98, then skip to B190.***

B189. During the last 6 months, on average how often have you used (not injecting) other prescription opioids (Vicodin, Darvon, Percocet) in [LCOUNTRY]? (Choose one)

- |    |                            |
|----|----------------------------|
| 00 | Never                      |
| 01 | One time per month or less |
| 02 | 2 to 3 days per month      |
| 03 | One time per week          |
| 04 | 2 to 3 days per week       |
| 05 | 4 to 6 days per week       |
| 06 | One time per day           |
| 07 | 2-3 times per day          |
| 08 | 4 times or more per day    |
| 98 | Refuse to Answer           |

B190. Have you ever used Hallucinogenic drugs like acid, LSD, peyote, mescaline, mushrooms?

- |   |                  |
|---|------------------|
| 1 | Yes              |
| 0 | No               |
| 8 | Refuse to Answer |

***If B190 is not equal to 1, then skip to B193.***

B191. How old were you when you first used Hallucinogenic drugs like acid, LSD, peyote, mescaline, mushrooms?

- |       |                  |
|-------|------------------|
| __ __ | Years Old        |
| 98    | Refuse to Answer |

***If B191 is less than B73 or B191 is greater than A1 and B191 is not equal to 98 then READ: "The response is either smaller than the age when the participant used drugs for the first time or exceeds the participant's age. Please check the response." and skip to B191.***

B192. During the last 6 months, on average how often have you used Hallucinogenic drugs like acid, LSD, peyote, mescaline, mushrooms in [LCOUNTRY]? (Choose one)

- 00 Never
- 01 One time per month or less
- 02 2 to 3 days per month
- 03 One time per week
- 04 2 to 3 days per week
- 05 4 to 6 days per week
- 06 One time per day
- 07 2-3 times per day
- 08 4 times or more per day
- 98 Refuse to Answer

B193. Have you ever used Inhalants (glue or gasoline)?

- 1 Yes
- 0 No
- 8 Refuse to Answer

***If B193 is not equal to 1, then skip to B196.***

B194. How old were you when you first used Inhalants (glue or gasoline)?

- \_\_\_ Years Old
- 98 Refuse to Answer

***If B194 is less than B73 or B194 is greater than A1 and B194 is not equal to 98 then READ: "The response is either smaller than the age when the participant used drugs for the first time or exceeds the participant's age. Please check the response." and skip to B194.***



B195. During the last 6 months, on average how often have you used Inhalants (glue or gasoline) in [LCOUNTRY]? (Choose one)

- |    |                            |
|----|----------------------------|
| 00 | Never                      |
| 01 | One time per month or less |
| 02 | 2 to 3 days per month      |
| 03 | One time per week          |
| 04 | 2 to 3 days per week       |
| 05 | 4 to 6 days per week       |
| 06 | One time per day           |
| 07 | 2-3 times per day          |
| 08 | 4 times or more per day    |
| 98 | Refuse to Answer           |

B196. Have you ever used tranquilizers (Diazepam, Valium, Ativan, Restori or Rivotril) ?

- |   |                  |
|---|------------------|
| 1 | Yes              |
| 0 | No               |
| 8 | Refuse to Answer |

***If B196 is not equal to 1, then skip to B204.***

B197. How old were you when you first used tranquilizers (Diazepam, Valium, Ativan, Restoril or Rivotril)?

- |     |                  |
|-----|------------------|
| ___ | Years Old        |
| 98  | Refuse to Answer |

***If B197 is less than B73 or B197 is greater than A1 and B197 is not equal to 98 then READ: "The response is either smaller than the age when the participant used drugs for the first time or exceeds the participant's age. Please check the response." and skip to B197.***

B198. Have you ever injected tranquilizers (Diazepam, Valium, Ativan, Restoril, or Rivotril)?

- 1 Yes
- 0 No
- 8 Refuse to Answer

***If B198 is not equal to 1, then skip to B200.***

B199. How old were you when you first injected tranquilizers (Diazepam, Valium, Ativan, Restoril, or Rivotril)?

- \_\_\_ Years Old
- 98 Refuse to Answer

***If B199 is less than B76 or B199 is greater than A1 and B199 is not equal to 98 then READ: "The response is either smaller than the age when the participant inject drugs for the first time or exceeds the participant's age. Please check the response." and skip to B199.***

B200. If you used tranquilizers (Diazepam, Valium, Ativan, Restoril or Rivotril) in the last 6 months in [LCOUNTRY], how did you use it?

**Interviewer: If the participant indicates that they did not use tranquilizers in [LCOUNTRY] in the past 6 months, then check Not Applicable (Check all that apply)**

- \_\_\_ Injecting
- \_\_\_ Smoking/chasing
- \_\_\_ Snorting
- \_\_\_ Inhaling
- \_\_\_ Swallowing
- \_\_\_ Rectally/bumping
- \_\_\_ Other
- \_\_\_ Not Applicable
- \_\_\_ Refuse to Answer

***If B200 is greater than 1 and B200H is equal to 1 then READ: "You can only choose the response "Not Applicable" by itself. Please check responses." and skip to B200.***

***If B200G is not equal to 1, then skip to instruction before B202.***

B201. Please, specify what other way you used tranquilizers (Diazepam, Valium, Ativan, Restoril or Rivotril) in the last 6 months.

---

*If B200A is not equal to 1, then skip to instruction before B203.*

B202. During the last 6 months, on average how often have you injected tranquilizers (Diazepam, Valium, Ativan, Restoril or Rivotril) in [LCOUNTRY]? (Choose one)

- |    |                            |
|----|----------------------------|
| 00 | Never                      |
| 01 | One time per month or less |
| 02 | 2 to 3 days per month      |
| 03 | One time per week          |
| 04 | 2 to 3 days per week       |
| 05 | 4 to 6 days per week       |
| 06 | One time per day           |
| 07 | 2-3 times per day          |
| 08 | 4 times or more per day    |
| 98 | Refuse to Answer           |

*If B200H is equal to 1 or B200 is equal to 98, then skip to B204.*

B203. During the last 6 months, on average how often have you used (not injecting) tranquilizers (Diazepam, Valium, Ativan, Restoril or Rivotril) in [LCOUNTRY]? (Choose one)

- |    |                            |
|----|----------------------------|
| 00 | Never                      |
| 01 | One time per month or less |
| 02 | 2 to 3 days per month      |
| 03 | One time per week          |
| 04 | 2 to 3 days per week       |
| 05 | 4 to 6 days per week       |
| 06 | One time per day           |
| 07 | 2-3 times per day          |
| 08 | 4 times or more per day    |
| 98 | Refuse to Answer           |

B204. Have you ever used barbiturates (Amytal, Nembutal, and Seconal)?

|   |                  |
|---|------------------|
| 1 | Yes              |
| 0 | No               |
| 8 | Refuse to Answer |

***If B204 is not equal to 1, then skip to B212.***

B205. How old were you when you first used barbiturates (Amytal, Nembutal, and Seconal)?

- |     |                  |
|-----|------------------|
| ___ | Years Old        |
| 98  | Refuse to Answer |

***If B205 is less than B73 or B205 is greater than A1 and B205 is not equal to 98 then READ: "The response is either smaller than the age when the participant used drugs for the first time or exceeds the participant's age. Please check the response." and skip to B205.***

B206. Have you ever injected barbiturates (Amytal, Nembutal, and Seconal)?

|   |                  |
|---|------------------|
| 1 | Yes              |
| 0 | No               |
| 8 | Refuse to Answer |

***If B206 is not equal to 1, then skip to B208.***

B207. How old were you when you first injected barbiturates (Amytal, Nembutal, and Seconal)?

\_\_\_ \_\_\_ Years Old

98 Refuse to Answer

*If B207 is less than B76 or B207 is greater than A1 and B207 is not equal to 98 then READ: "The response is either smaller than the age when the participant inject drugs for the first time or exceeds the participant's age. Please check the response." and skip to B207.*

B208. If you used barbiturates (Amytal, Nembutal, and Seconal) in the last 6 months in [LCOUNTRY], how did you use it?

**Interviewer: If the participant indicates that they did not use barbiturates in [LCOUNTRY] in the past 6 months, then check Not Applicable (Check all that apply)**

\_\_\_ Injecting

\_\_\_ Smoking/chasing

\_\_\_ Snorting

\_\_\_ Inhaling

\_\_\_ Swallowing

\_\_\_ Rectally/bumping

\_\_\_ Other

\_\_\_ Not Applicable

\_\_\_ Refuse to Answer

*If B208 is greater than 1 and B208H is equal to 1 then READ: "You can only choose the response "Not Applicable" by itself. Please check responses." and skip to B208.*

*If B208G is not equal to 1, then skip to instruction before B210.*

B209. Please, specify what other way you used barbiturates (Amytal, Nembutal, and Seconal) in the last 6 months.

-----

*If B208A is not equal to 1, then skip to instruction before B211.*

B210. During the last 6 months, on average how often have you injected barbiturates (Amytal, Nembutal, and Seconal) in [LCOUNTRY]? (Choose one)

- 00 Never
- 01 One time per month or less
- 02 2 to 3 days per month
- 03 One time per week
- 04 2 to 3 days per week
- 05 4 to 6 days per week
- 06 One time per day
- 07 2-3 times per day
- 08 4 times or more per day
- 98 Refuse to Answer

***If B208H is equal to 1 or B208 is equal to 98, then skip to B212.***

B211. During the last 6 months, on average how often have you used (not injecting) barbiturates (Amytal, Nembutal, and Seconal) in [LCOUNTRY]? (Choose one)

- 00 Never
- 01 One time per month or less
- 02 2 to 3 days per month
- 03 One time per week
- 04 2 to 3 days per week
- 05 4 to 6 days per week
- 06 One time per day
- 07 2-3 times per day
- 08 4 times or more per day
- 98 Refuse to Answer

B212. Have you ever used brain pills (Nootropic, modafinil, ritalin)?

|  |   |                  |
|--|---|------------------|
|  | 1 | Yes              |
|  | 0 | No               |
|  | 8 | Refuse to Answer |

***If B212 is not equal to 1, then skip to B220.***

B213. How old were you when you first used brain pills (Nootropic, modafinil, ritalin)?

|  |       |                  |
|--|-------|------------------|
|  | __ __ | Years Old        |
|  | 98    | Refuse to Answer |

***If B213 is less than B73 or B213 is greater than A1 and B213 is not equal to 98 then READ: "The response is either smaller than the age when the participant used drugs for the first time or exceeds the participant's age. Please check the response." and skip to B213.***

B214. Have you ever injected brain pills (Nootropic, modafinil, ritalin)?

|  |   |                  |
|--|---|------------------|
|  | 1 | Yes              |
|  | 0 | No               |
|  | 8 | Refuse to Answer |

***If B214 is not equal to 1, then skip to B216.***

B215. How old were you when you first injected brain pills (Nootropic, modafinil, ritalin)?

|  |       |                  |
|--|-------|------------------|
|  | __ __ | Years Old        |
|  | 98    | Refuse to Answer |

***If B215 is less than B76 or B215 is greater than A1 and B215 is not equal to 98 then READ: "The response is either smaller than the age when the participant inject drugs for the first time or exceeds the participant's age. Please check the response." and skip to B215.***

B216. If you used brain pills (Nootropic, modafinil, ritalin) in the last 6 months in [LCOUNTRY], how did you use it?

**Interviewer: If the participant indicates that they did not use brain pills in [LCOUNTRY] in the past 6 months, then check Not Applicable (Check all that apply)**

- Injecting
- Smoking/chasing
- Snorting
- Inhaling
- Swallowing
- Rectally/bumping
- Other
- Not Applicable
- Refuse to Answer

***If B216 is greater than 1 and B216H is equal to 1 then READ: "You can only choose the response "Not Applicable" by itself. Please check responses." and skip to B216.***

***If B216G is not equal to 1, then skip to instruction before B218.***

B217. Please, specify what other way you used brain pills (Nootropic, modafinil, ritalin) the last 6 months.

-----

***If B216A is not equal to 1, then skip to instruction before B219.***



B218. During the last 6 months, on average how often have you injected brain pills (Nootropic, modafinil, ritalin) in [LCOUNTRY]? (Choose one)

- 00 Never
- 01 One time per month or less
- 02 2 to 3 days per month
- 03 One time per week
- 04 2 to 3 days per week
- 05 4 to 6 days per week
- 06 One time per day
- 07 2-3 times per day
- 08 4 times or more per day
- 98 Refuse to Answer

***If B216H is equal to 1 or B216 is equal to 98, then skip to B220.***

B219. During the last 6 months, on average how often did you use (not injecting) brain pills (Nootropic, modafinil, ritalin) in [LCOUNTRY]? (Choose one)

- 00 Never
- 01 One time per month or less
- 02 2 to 3 days per month
- 03 One time per week
- 04 2 to 3 days per week
- 05 4 to 6 days per week
- 06 One time per day
- 07 2-3 times per day
- 08 4 times or more per day
- 98 Refuse to Answer

- B220. Have you ever used another drug by itself (Not Mentioned Earlier)?  
**Interviewer, please prompt for bath salts.**
- |  |   |                  |
|--|---|------------------|
|  | 1 | Yes              |
|  | 0 | No               |
|  | 8 | Refuse to Answer |

***If B220 is not equal to 1, then skip to B238.***

B221. Please specify the other drug that you used by itself?

-----  
-----

- B222. How old were you when you first used [Response to B221] by itself?    \_\_\_            Years Old
- |  |    |                  |
|--|----|------------------|
|  | 98 | Refuse to Answer |
|--|----|------------------|

***If B222 is less than B73 or B222 is greater than A1 and B222 is not equal to 98 then READ: "The response is either smaller than the age when the participant used drugs for the first time or exceeds the participant's age. Please check the response." and skip to B222.***

- B223. Have you ever injected [Response to B221]?
- |  |   |                  |
|--|---|------------------|
|  | 1 | Yes              |
|  | 0 | No               |
|  | 8 | Refuse to Answer |

***If B223 is not equal to 1, then skip to B225.***

- B224. How old were you when you first injected [Response to B221]?
- |  |     |                  |
|--|-----|------------------|
|  | ___ | Years Old        |
|  | 98  | Refuse to Answer |

***If B224 is less than B76 or B224 is greater than A1 and B224 is not equal to 98 then READ: "The response is either smaller than the age when the participant inject drugs for the first time or exceeds the participant's age. Please check the response." and skip to B224.***

B225. If you used [Response to B221] in the last 6 months in [LCOUNTRY], how did you use it?  
**Interviewer: If the participant indicates that they did not use [Response to B221] in [LCOUNTRY] in the past 6 months, then check Not Applicable (Check all that apply)**

- Injecting
- Smoking/chasing
- Snorting
- Inhaling
- Swallowing
- Rectally/bumping
- Other
- Not Applicable
- Refuse to Answer

***If B225 is greater than 1 and B225H is equal to 1 then READ: "You can only choose the response "Not Applicable" by itself. Please check responses." and skip to B225.***

***If B225G is not equal to 1, then skip to instruction before B227.***

B226. Please, specify what other way you used [Response to B221] in the last 6 months.

-----

***If B225A is not equal to 1, then skip to instruction before B228.***

B227. During the last 6 months, on average how often have you injected [Response to B221] in [LCOUNTRY]? (Choose one)

- 00 Never
- 01 One time per month or less
- 02 2 to 3 days per month
- 03 One time per week
- 04 2 to 3 days per week
- 05 4 to 6 days per week
- 06 One time per day
- 07 2-3 times per day
- 08 4 times or more per day
- 98 Refuse to Answer

***If B225H is equal to 1 or B225 is equal to 98, then skip to B229.***

B228. During the last 6 months, on average how often did you use (not injecting) [Response to B221] in [LCOUNTRY]? (Choose one)

- 00 Never
- 01 One time per month or less
- 02 2 to 3 days per month
- 03 One time per week
- 04 2 to 3 days per week
- 05 4 to 6 days per week
- 06 One time per day
- 07 2-3 times per day
- 08 4 times or more per day
- 98 Refuse to Answer

- B229. Have you ever used another drug by itself (Not Mentioned Earlier)?
- |  |   |                  |
|--|---|------------------|
|  | 1 | Yes              |
|  | 0 | No               |
|  | 8 | Refuse to Answer |

***If B229 is not equal to 1, then skip to B238.***

B230. Please specify the other drug that you used by itself?

-----

- B231. How old were you when you first used [Response to B230] by itself?    \_\_\_    Years Old
- |  |    |                  |
|--|----|------------------|
|  | 98 | Refuse to Answer |
|--|----|------------------|

***If B231 is less than B73 or B231 is greater than A1 and B231 is not equal to 98 then READ: "The response is either smaller than the age when the participant used drugs for the first time or exceeds the participant's age. Please check the response." and skip to B231.***

- B232. Have you ever injected [Response to B230]?
- |  |   |                  |
|--|---|------------------|
|  | 1 | Yes              |
|  | 0 | No               |
|  | 8 | Refuse to Answer |

***If B232 is not equal to 1, then skip to B234.***

- B233. How old were you when you first injected [Response to B230]?
- |  |     |                  |
|--|-----|------------------|
|  | ___ | Years Old        |
|  | 98  | Refuse to Answer |

***If B233 is less than B76 or B233 is greater than A1 and B233 is not equal to 98 then READ: "The response is either smaller than the age when the participant inject drugs for the first time or exceeds the participant's age. Please check the response." and skip to B233.***

B234. If you used [Response to B230] in the last 6 months in [LCOUNTRY], how did you use it?  
**Interviewer: If the participant indicates that they did not use [Response to B230] in [LCOUNTRY] in the past 6 months, then check Not Applicable (Check all that apply)**

- Injecting
- Smoking/chasing
- Snorting
- Inhaling
- Swallowing
- Rectally/bumping
- Other
- Not Applicable
- Refuse to Answer

***If B234 is greater than 1 and B234H is equal to 1 then READ: "You can only choose the response "Not Applicable" by itself. Please check responses." and skip to B234.***

***If B234G is not equal to 1, then skip to instruction before B236.***

B235. Please, specify what other way you used [Response to B230] in the last 6 months.

-----

***If B234A is not equal to 1, then skip to instruction before B237.***

B236. During the last 6 months, on average how often have you injected [Response to B230] in [LCOUNTRY]? (Choose one)

- 00 Never
- 01 One time per month or less
- 02 2 to 3 days per month
- 03 One time per week
- 04 2 to 3 days per week
- 05 4 to 6 days per week
- 06 One time per day
- 07 2-3 times per day
- 08 4 times or more per day
- 98 Refuse to Answer

***If B234H is equal to 1 or B234 is equal to 98, then skip to B238.***

B237. During the last 6 months, on average how often did you (not injecting) use [Response to B230] in [LCOUNTRY]? (Choose one)

- 00 Never
- 01 One time per month or less
- 02 2 to 3 days per month
- 03 One time per week
- 04 2 to 3 days per week
- 05 4 to 6 days per week
- 06 One time per day
- 07 2-3 times per day
- 08 4 times or more per day
- 98 Refuse to Answer

- B238. Have you ever used another drug combination (Not Mentioned Earlier)?
- |  |   |                  |
|--|---|------------------|
|  | 1 | Yes              |
|  | 0 | No               |
|  | 8 | Refuse to Answer |

***If B238 is not equal to 1, then skip to instruction before B256.***

B239. Please specify the other drug combination you used by itself?

-----

- B240. How old were you when you first used [Response to B239] ?
- |  |       |                  |
|--|-------|------------------|
|  | __ __ | Years Old        |
|  | 98    | Refuse to Answer |

***If B240 is less than B73 or B240 is greater than A1 and B240 is not equal to 98 then READ: "The response is either smaller than the age when the participant used drugs for the first time or exceeds the participant's age. Please check the response." and skip to B240.***

- B241. Have you ever injected [Response to B239]?
- |  |   |                  |
|--|---|------------------|
|  | 1 | Yes              |
|  | 0 | No               |
|  | 8 | Refuse to Answer |

***If B241 is not equal to 1, then skip to B243.***

- B242. How old were you when you first injected [Response to B239]?
- |  |       |                  |
|--|-------|------------------|
|  | __ __ | Years Old        |
|  | 98    | Refuse to Answer |

***If B242 is less than B76 or B242 is greater than A1 and B242 is not equal to 98 then READ: "The response is either smaller than the age when the participant inject drugs for the first time or exceeds the participant's age. Please check the response." and skip to B242.***



B243. If you used [Response to B239] in the last 6 months in [LCOUNTRY], how did you use it?  
**Interviewer: If the participant indicates that they did not use [Response to B239] in [LCOUNTRY] in the past 6 months, then check Not Applicable (Check all that apply)**

- Injecting
- Smoking/chasing
- Snorting
- Inhaling
- Swallowing
- Rectally/bumping
- Other
- Not Applicable
- Refuse to Answer

***If B243 is greater than 1 and B243H is equal to 1 then READ: "You can only choose the response "Not Applicable" by itself. Please check responses." and skip to B243.***

***If B243G is not equal to 1, then skip to instruction before B245.***

B244. Please, specify what other way you used [Response to B239] in the last 6 months.

-----

***If B243A is not equal to 1, then skip to instruction before B246.***

B245. During the last 6 months, on average how often have you injected [Response to B239] in [LCOUNTRY]? (Choose one)

- 00 Never
- 01 One time per month or less
- 02 2 to 3 days per month
- 03 One time per week
- 04 2 to 3 days per week
- 05 4 to 6 days per week
- 06 One time per day
- 07 2-3 times per day
- 08 4 times or more per day
- 98 Refuse to Answer

***If B243H is equal to 1 or B243 is equal to 98, then skip to B247.***

B246. During the last 6 months, on average how often did you use (not injecting) [Response to B239] in [LCOUNTRY]? (Choose one)

- 00 Never
- 01 One time per month or less
- 02 2 to 3 days per month
- 03 One time per week
- 04 2 to 3 days per week
- 05 4 to 6 days per week
- 06 One time per day
- 07 2-3 times per day
- 08 4 times or more per day
- 98 Refuse to Answer

- B247. Have you ever used another drug combination (Not Mentioned Earlier)?
- |   |                  |
|---|------------------|
| 1 | Yes              |
| 0 | No               |
| 8 | Refuse to Answer |

***If B247 is not equal to 1, then skip to instruction before B256.***

- B248. Please specify the other drug combination you used by itself?
- 

- B249. How old were you when you first used [Response to B248] ?
- |     |                  |
|-----|------------------|
| ___ | Years Old        |
| 98  | Refuse to Answer |

***If B249 is less than B73 or B249 is greater than A1 and B249 is not equal to 98 then READ: "The response is either smaller than the age when the participant used drugs for the first time or exceeds the participant's age. Please check the response." and skip to B249.***

- B250. Have you ever injected [Response to B248]?
- |   |                  |
|---|------------------|
| 1 | Yes              |
| 0 | No               |
| 8 | Refuse to Answer |

***If B250 is not equal to 1, then skip to B252.***

- B251. How old were you when you first injected [Response to B248]?
- |     |                  |
|-----|------------------|
| ___ | Years Old        |
| 98  | Refuse to Answer |

***If B251 is less than B76 or B251 is greater than A1 and B251 is not equal to 98 then READ: "The response is either smaller than the age when the participant inject drugs for the first time or exceeds the participant's age. Please check the response." and skip to B251.***

B252. If you used [Response to B248] in the last 6 months in [LCOUNTRY], how did you use it?  
**Interviewer: If the participant indicates that they did not use [Response to B248] in [LCOUNTRY] in the past 6 months, then check Not Applicable (Check all that apply)**

- Injecting
- Smoking/chasing
- Snorting
- Inhaling
- Swallowing
- Rectally/bumping
- Other
- Not Applicable
- Refuse to Answer

***If B252 is greater than 1 and B252H is equal to 1 then READ: "You can only choose the response "Not Applicable" by itself. Please check responses." and skip to B252.***

***If B252G is not equal to 1, then skip to instruction before B254.***

B253. Please, specify what other way you used [Response to B248] in the last 6 months.

-----

***If B252A is not equal to 1, then skip to instruction before B255.***

B254. During the last 6 months, on average how often have you injected [Response to B248] in [LCOUNTRY]? (Choose one)

- 00 Never
- 01 One time per month or less
- 02 2 to 3 days per month
- 03 One time per week
- 04 2 to 3 days per week
- 05 4 to 6 days per week
- 06 One time per day
- 07 2-3 times per day
- 08 4 times or more per day
- 98 Refuse to Answer

***If B252H is equal to 1 or B252 is equal to 98, then skip to instruction before B256.***

B255. During the last 6 months, on average how often did you use (not injecting) [Response to B248] in [LCOUNTRY]? (Choose one)

- 00 Never
- 01 One time per month or less
- 02 2 to 3 days per month
- 03 One time per week
- 04 2 to 3 days per week
- 05 4 to 6 days per week
- 06 One time per day
- 07 2-3 times per day
- 08 4 times or more per day
- 98 Refuse to Answer

**ANYINJ6M = If(B92 is not equal to 0 and B92 is not equal to 98 and B92 is not equal to "skipped" or B106 is not equal to 0 and B106 is not equal to 98 and B106 is not equal to "skipped" or B109 is not equal to 0 and B109 is not equal to 98 and B109 is not equal to "skipped" or B117 is not equal to 0 and B117 is not equal to 98 and B117 is not equal to "skipped" or B124 is not equal to 0 and B124 is not equal to 98 and B124 is not equal to "skipped" or B127 is not equal to 0 and B127 is not equal to 98 and B127 is not equal to "skipped" or B136 is not equal to 0 and B136 is not equal to 98 and B136 is not equal to "skipped" or B139 is not equal to 0 and B139 is not equal to 98 and B139 is not equal to "skipped" or B146 is not equal to 0 and B146 is not equal to 98 and B146 is not equal to "skipped" or B153 is not equal to 0 and B153 is not equal to 98 and B153 is not equal to "skipped" or B164 is not equal to 0 and B164 is not equal to 98 and B164 is not equal to "skipped" or B172 is not equal to 0 and B172 is not equal to 98 and B172 is not equal to "skipped" or B180 is not equal to 0 and B180 is not equal to 98 and B180 is not equal to "skipped" or B188 is not equal to 0 and B188 is not equal to 98 and B188 is not equal to "skipped" or B202 is not equal to 0 and B202 is not equal to 98 and B202 is not equal to "skipped" or B210 is not equal to 0 and B210 is not equal to 98 and B210 is not equal to "skipped" or B218 is not equal to 0 and B218 is not equal to 98 and B218 is not equal to "skipped" or B227 is not equal to 0 and B227 is not equal to 98 and B227 is not equal to "skipped" or B236 is not equal to 0 and B236 is not equal to 98 and B236 is not equal to "skipped" or B245 is not equal to 0 and B245 is not equal to 98 and B245 is not equal to "skipped" or B254 is not equal to 0 and B254 is not equal to 98 and B254 is not equal to "skipped", 1, 0)**

**If ANYINJ6M is equal to 0 then READ: "The summary of responses to drug questions disqualifies participant for enrollment into study. Please check the responses by reviewing each drug question again." and skip to B86.**

**READ: INTERVIEWER READ TO THE RESPONDENT: The Next Questions have to do with injection and sharing behaviors. I know I asked you before but can you remind me...**

B256. In the past 6 months, on average in [LCOUNTRY], how often did you inject (shoot) any drug or drug combinations? (Choose one)

- |    |                            |
|----|----------------------------|
| 01 | One time per month or less |
| 02 | 2 to 3 days per month      |
| 03 | One time per week          |
| 04 | 2 to 3 days per week       |
| 05 | 4 to 6 days per week       |
| 06 | One time per day           |
| 07 | 2-3 times per day          |
| 08 | 4 times or more per day    |
| 98 | Refuse to Answer           |

B257. Of the times you injected in the last 6 months in [LCOUNTRY], how often did you give, rent or lend a syringe that you already used to someone else? (Choose one)

- 1 Never
- 2 Sometimes
- 3 About half of the time
- 4 Often
- 5 Always
- 8 Refuse to Answer

B258. Of the times you injected in the last 6 months in [LCOUNTRY], how often did you use a syringe that you knew or suspected that it had been used before by someone else? (Choose one)

- 1 Never
- 2 Sometimes
- 3 About half of the time
- 4 Often
- 5 Always
- 8 Refuse to Answer

*If B258 is equal to 1 or B258 is equal to 8, then skip to B261.*

B259. The last time you injected drugs in [LCOUNTRY], did you use a syringe that you knew or suspected that it had been used before by someone else?

- 1 Yes
- 0 No
- 8 Refuse to Answer

B260. Of the times you injected with a syringe that had been used by somebody else in the last 6 months in [LCOUNTRY], how often did you clean it with bleach before you used it? (Choose one)

- 1 Never
- 2 Less than half the time
- 3 About half of the time
- 4 More than half the time
- 5 Always
- 8 Refuse to Answer

B261. Of the times you injected with other people in the last 6 months in [LCOUNTRY], how often did you divide up drugs with somebody else by using a syringe? This is also called back loading, piggybacking or splitting drugs wet. (Choose one)

- 1 Never
- 2 Less than half the time
- 3 About half of the time
- 4 More than half the time
- 5 Always
- 8 Refuse to Answer

B262. Of the times you injected in the last 6 months in [LCOUNTRY], how often did you use a cooker, cotton, or water with someone or after someone else used it? (Choose one)

- 1 Never
- 2 Less than half the time
- 3 About half of the time
- 4 More than half the time
- 5 Always
- 8 Refuse to Answer



B263. Of the times you injected in the last 6 months in [LCOUNTRY], how often did you buy drugs that came already prepared in a syringe? (Choose one)

- 1 Never
- 2 Less than half the time
- 3 About half of the time
- 4 More than half the time
- 5 Always
- 8 Refuse to Answer

B264. Of the times you injected in the last 6 months in [LCOUNTRY], how often did you inject with a new, sterile syringe? (Choose one)

- 1 Never
- 2 Less than half the time
- 3 About half of the time
- 4 More than half the time
- 5 Always
- 8 Refuse to Answer

B265. In the last 6 months in [LCOUNTRY], from where did you get the syringes you used to inject drugs?  
(Check all that apply)

- Pharmacy
- Spouse, family member, or sex partner
- Friend
- Acquaintance/Stranger
- Drug Dealer
- Hit Doctor
- Shooting gallery
- Syringe exchange program (you exchanged it yourself)
- Someone who gets them from a syringe exchange program
- Bought on the street
- Doctor/ clinic/ hospital
- Veterinary clinic/ pet store
- Market/Store
- Found on the ground or in the trash
- Some other place
- Refuse to Answer

***If B265O is equal to 1 then skip to B266***

***If not, then skip to instruction before B267.***

B266. Please specify the "other" place where you got syringes from in the past 6 months.

-----

***If B265A + B265B + B265C + B265D + B265E + B265F + B265G + B265H + B265I + B265J + B265K + B265L + B265M + B265N + B265O is not equal to 1 then skip to B267***

***If not, then skip to instruction before B269.***

B267. In the last 6 months in [LCOUNTRY], where did you get your syringes most often from? (Choose one)

- |    |                                                       |
|----|-------------------------------------------------------|
| 01 | Pharmacy                                              |
| 02 | Spouse, family member, or sex partner                 |
| 03 | Friend                                                |
| 04 | Acquaintance/Stranger                                 |
| 05 | Drug Dealer                                           |
| 06 | Hit Doctor                                            |
| 07 | Shooting gallery                                      |
| 08 | Syringe exchange program (you exchanged it yourself)  |
| 09 | Someone who gets them from a syringe exchange program |
| 10 | Bought on the street                                  |
| 11 | Doctor/ clinic/ hospital                              |
| 12 | Veterinary clinic/ pet store                          |
| 13 | Market/Store                                          |
| 14 | Found on the ground or in the trash                   |
| 15 | Some other place                                      |
| 98 | Refuse to Answer                                      |

***If B267 is equal to 1 and B265A is not equal to 1 or B267 is equal to 2 and B265B is not equal to 1 or B267 is equal to 3 and B265C is not equal to 1 or B267 is equal to 4 and B265D is not equal to 1 or B267 is equal to 5 and B265E is not equal to 1 or B267 is equal to 6 and B265F is not equal to 1 or B267 is equal to 7 and B265G is not equal to 1 or B267 is equal to 8 and B265H is not equal to 1 or B267 is equal to 9 and B265I is not equal to 1 or B267 is equal to 10 and B265J is not equal to 1 or B267 is equal to 11 and B265K is not equal to 1 or B267 is equal to 12 and B265L is not equal to 1 or B267 is equal to 13 and B265M is not equal to 1 or B267 is equal to 14 and B265N is not equal to 1 or B267 is equal to 15 and B265O is not equal to 1 then READ: "Participant could only choose the most often place out of places named before." and skip to B267.***

***If B267 is equal to 15 then skip to B268***

***If not, then skip to instruction before B269.***

B268. Please specify the place where you've got your syringes most often from , in the past 6 months.

-----

***If B267 is equal to 1 or B267 is equal to 8 then skip to B269***

***If not, then skip to instruction before B271.***

B269. In the last 6 months in [LCOUNTRY], how many sterile, clean syringes per visit did you get from a Needle Exchange Program on average?

-----

998 Refuse to Answer

***If B269 is equal to 0 or B269 is equal to 998, then skip to instruction before B271.***

B270. What was the name of the Needle Exchange Program you got syringes from most often?

-----

***If B265A is equal to 1 or B267 is equal to 1 then skip to B271***

***If not, then skip to B273.***

B271. In the last 6 months in [LCOUNTRY], how many sterile, clean syringes per visit did you get from a pharmacy on average?

-----

998 Refuse to Answer

***If B271 is equal to 0 or B271 is equal to 998, then skip to B273.***

B272. What was the name of the Pharmacy you bought syringes from most often?

-----

B273. In the last 6 months in [LCOUNTRY], how easy or hard was it for you to get new, unused syringes when you injected drugs? (Choose one)

- 1 Never tried to get new, unused syringes
- 2 Very easy
- 3 Easy
- 4 Hard
- 5 Very hard
- 8 Refuse to Answer

***If B273 is equal to 4 or B273 is equal to 5 then skip to B274***

***If not, then skip to instruction before B275.***

B274. What was the main reason it was hard to get new, unused syringes in [LCOUNTRY]? (Choose one)

- 1 They cost too much/ No money to buy them
- 2 No place to legally buy them / store won't sell to me
- 3 No syringe exchange program nearby
- 4 I'm worried about getting caught / arrested by police with syringes
- 5 Pharmacy/store was closed
- 6 Other
- 7 Don't Know
- 8 Refuse to Answer

***If B274 is equal to 6 then skip to B275***

***If not, then skip to B276.***

B275. Please specify the main reason why it was hard to get new/unused syringes.

-----

B276. Have you ever sought the help of someone to help you inject drugs, like a hit doctor in [LCOUNTRY]?

- 1 Yes
- 0 No
- 7 Don't Know
- 8 Refuse to Answer

*If B276 is not equal to 1, then skip to instruction before B281.*

B277. When was the last time someone helped you inject drugs in [LCOUNTRY]?

- \_\_\_ MONTHS
- \_\_\_ WEEKS
- \_\_\_ DAYS
- 998 Refuse to Answer (Months)

*If B277 is greater than A1 and B277 is not equal to 998 then READ: "The response exceeds the participant's age. Please check the response." and skip to B277.*

*If B277 is greater than 6 and B277 is not equal to 98, then skip to instruction before B281.*

B278. In the last 6 months in [LCOUNTRY] how often has someone else helped you inject? (Choose one)

- 1 Always
- 2 Often
- 3 Sometimes
- 4 Rarely
- 8 Refuse to Answer

B279. In the last 6 months when someone helped you inject drugs, what countries did this happen in? (Check all that apply)

- the US
- Mexico
- Other
- Refuse to Answer

***If B279C is not equal to 1, then skip to instruction before B281.***

B280. Please specify other country

-----

**DRUG Market Characteristics**

**READ: INTERVIEWER READ TO THE RESPONDENT:** *In the next section we will be talking about the price, purity and availability of drugs on the streets and whether there have been changes in [LCITY]. We will ask you about specific drugs and we will take about prices first and then about purity and finally about their availability. I will ask you about specific drugs and I would like your opinion even if you have not used a specific drug.*

- B281. Please, select the type of currency you know a drug cost. (Choose one)
- 1 Pesos
  - 2 US Dollars
  - 8 Refuse to Answer

*If B281 is equal to 2 then skip to B282*

*If not, then skip to instruction before B297.*

- B282. In US dollars: How much does it cost a dose of black tar/heroin by itself in [LCITY]?
- \_\_\_\_\_ dollars
  - 997 Don't Know
  - 998 Refuse to Answer

- B283. In US dollars: How much does it cost a dose of powder heroinr by itself in [LCITY]?
- \_\_\_\_\_ dollars
  - 997 Don't Know
  - 998 Refuse to Answer

- B284. In US dollars: How much does it cost a dose of Crack cocaine by itself in [LCITY]?
- \_\_\_\_\_ dollars
  - 997 Don't Know
  - 998 Refuse to Answer



B285. In US dollars: How much does it cost a dose of Cocaine (powder) by itself in [LCITY]?

\_ \_ \_ \_ dollars

997 Don't Know

998 Refuse to Answer

B286. In US dollars: How much does it cost a dose of heroin and cocaine together (speedball) in [LCITY]?

\_ \_ \_ \_ dollars

997 Don't Know

998 Refuse to Answer

B287. In US dollars: How much does it cost a dose of Methamphetamine/crystal in [LCITY]?

\_ \_ \_ \_ dollars

997 Don't Know

998 Refuse to Answer

B288. In US dollars: How much does it cost a dose of China White in [LCITY]?

\_ \_ \_ \_ dollars

997 Don't Know

998 Refuse to Answer

B289. In US dollars: How much does it cost a dose of OxyContin, without a prescription in [LCITY]?

\_ \_ \_ \_ dollars

997 Don't Know

998 Refuse to Answer

B290. In US dollars: How much does it cost a dose of Other prescription opioids w/o prescription (Vicodin, Darvon, Percocet) in [LCITY]?

|       |                  |
|-------|------------------|
| — — — | dollars          |
| 997   | Don't Know       |
| 998   | Refuse to Answer |

B291. In US dollars: How much does it cost a dose of Tranquilizers (Rivotril, Diazepam, Valium, Ativan or Restoril) in [LCITY]?

|       |                  |
|-------|------------------|
| — — — | dollars          |
| 997   | Don't Know       |
| 998   | Refuse to Answer |

B292. In US dollars: How much does it cost a dose of Barbiturates without a prescription (Amytal, Nembutal, and Seconal) in [LCITY]?

|       |                  |
|-------|------------------|
| — — — | dollars          |
| 997   | Don't Know       |
| 998   | Refuse to Answer |

B293. In US dollars: How much does it cost a dose of Fentanyl in [LCITY]?

|       |                  |
|-------|------------------|
| — — — | dollars          |
| 997   | Don't Know       |
| 998   | Refuse to Answer |

B294. Do you know the cost of Another drug or combination that was not already mentioned in [LCITY]?

|   |                  |
|---|------------------|
| 1 | Yes              |
| 0 | No               |
| 8 | Refuse to Answer |

***If B294 is not equal to 1, then skip to instruction before B297.***

B295. In US dollars: How much does it cost a dose of Another drug or combination that was not already mentioned in [LCITY]?

- \_\_\_ \_\_\_ dollars
- 997 Don't Know
- 998 Refuse to Answer

*If B295 is greater than 0 and B295 is not equal to 998 then skip to B296*

*If not, then skip to instruction before B297.*

B296. Another drug or combination you named a cost for earlier.

-----

*If B281 is equal to 1 then skip to B297*

*If not, then skip to B312.*

B297. In pesos: How much does it cost a dose of black tar/heroin by itself in [LCITY]?

- \_\_\_ \_\_\_ pesos
- 997 Don't Know
- 998 Refuse to Answer

B298. In pesos: How much does it cost a dose of powder heroin by itself in [LCITY]?

- \_\_\_ \_\_\_ pesos
- 997 Don't Know
- 998 Refuse to Answer

B299. In pesos: How much does it cost a dose of Crack cocaine by itself in [LCITY]?

- \_\_\_ \_\_\_ pesos
- 997 Don't Know
- 998 Refuse to Answer

B300. In pesos: How much does it cost a dose of Cocaine (powder) by itself in [LCITY]?

— — — — pesos  
 9997 Don't Know  
 9998 Refuse to Answer

B301. In pesos: How much does it cost a dose of heroin and cocaine together (speedball) in [LCITY]?

— — — — pesos  
 9997 Don't Know  
 9998 Refuse to Answer

B302. In pesos: How much does it cost a dose of Methamphetamine/crystal by itself in [LCITY]?

— — — — pesos  
 9997 Don't Know  
 9998 Refuse to Answer

B303. In pesos: How much does it cost a dose of China White in [LCITY]?

— — — — pesos  
 9997 Don't Know  
 9998 Refuse to Answer

B304. In pesos: How much does it cost a dose of OxyContin, without a prescription in [LCITY]?

— — — — pesos  
 9997 Don't Know  
 9998 Refuse to Answer

B305. In pesos: How much does it cost a dose of Other prescription opioids w/o prescription (Vicodin, Darvon, Percocet) in [LCITY]?

|         |                  |
|---------|------------------|
| — — — — | pesos            |
| 9997    | Don't Know       |
| 9998    | Refuse to Answer |

B306. In pesos: How much does it cost a dose of Tranquilizers (Rivotril, Diazepam, Valium, Ativan or Restoril) in [LCITY]?

|         |                  |
|---------|------------------|
| — — — — | pesos            |
| 9997    | Don't Know       |
| 9998    | Refuse to Answer |

B307. In pesos: How much does it cost a dose of Barbiturates without a prescription (Amytal, Nembutal, and Seconal) in [LCITY]?

|         |                  |
|---------|------------------|
| — — — — | pesos            |
| 9997    | Don't Know       |
| 9998    | Refuse to Answer |

B308. In pesos: How much does it cost a dose of Fentanyl in [LCITY]?

|         |                  |
|---------|------------------|
| — — — — | pesos            |
| 9997    | Don't Know       |
| 9998    | Refuse to Answer |

B309. Do you know the cost in pesos of Another drug or combination that was not already mentioned in [LCITY]?

|   |                  |
|---|------------------|
| 1 | Yes              |
| 0 | No               |
| 8 | Refuse to Answer |

***If B309 is not equal to 1, then skip to B312.***

B310. In pesos: How much does it cost a dose of Another drug or combination that was not already mentioned in [LCITY]?

- \_\_\_\_\_ pesos
- 9997 Don't Know
- 9998 Refuse to Answer

***If B310 is greater than 0 and B310 is not equal to 998 then skip to B311***

***If not, then skip to B312.***

B311. Another drug or combination you named a cost for earlier.

-----

B312. Do you think that the price of most street drugs is generally higher or lower in Tijuana compared to San Diego? (Choose one)

- 1 Higher
- 2 Lower
- 3 The same
- 7 Don't Know
- 8 Refuse to Answer

B313. Do you think the closure of the Mexico-US border during the COVID pandemic has affected the price of drugs in San Diego?

- 1 Yes
- 0 No
- 7 Don't Know
- 8 Refuse to Answer

B314. Do you think the closure of the Mexico-US border during the COVID pandemic has affected the price of drugs in Tijuana?

- 1 Yes
- 0 No
- 7 Don't Know
- 8 Refuse to Answer

B315. In your opinion, in the last 6 months, has the price of heroin increased, decreased or stayed the same in [LCITY]? (Choose one)

- 1 Increased
- 2 Decreased
- 3 Stayed the same
- 7 Don't Know
- 8 Refuse to Answer

B316. In your opinion, in the last 6 months, has the price of methamphetamine increased, decreased or stayed the same in [LCITY]? (Choose one)

- 1 Increased
- 2 Decreased
- 3 Stayed the same
- 7 Don't Know
- 8 Refuse to Answer

B317. In your opinion, in the last 6 months, has the price of powder cocaine increased, decreased or stayed the same in [LCITY]? (Choose one)

- 1 Increased
- 2 Decreased
- 3 Stayed the same
- 7 Don't Know
- 8 Refuse to Answer

B318. In your opinion, in the last 6 months, has the price of crack cocaine increased, decreased or stayed the same in [LCITY]? (Choose one)

- 1 Increased
- 2 Decreased
- 3 Stayed the same
- 7 Don't Know
- 8 Refuse to Answer

B319. In your opinion, in the last 6 months, has the price of OxyContin increased, decreased or stayed the same in [LCITY]? (Choose one)

- 1 Increased
- 2 Decreased
- 3 Stayed the same
- 7 Don't Know
- 8 Refuse to Answer



B320. In your opinion, in the last 6 months, has the price of Fentanyl increased, decreased or stayed the same in [LCITY]? (Choose one)

- 1 Increased
- 2 Decreased
- 3 Stayed the same
- 7 Don't Know
- 8 Refuse to Answer

B321. In your opinion, in the last 6 months, has the price of China White increased, decreased or stayed the same in [LCITY]? (Choose one)

- 1 Increased
- 2 Decreased
- 3 Stayed the same
- 7 Don't Know
- 8 Refuse to Answer

B322. In your opinion, in the last 6 months, has the price of other prescription opioids increased, decreased or stayed the same in [LCITY]? (Choose one)

- 1 Increased
- 2 Decreased
- 3 Stayed the same
- 7 Don't Know
- 8 Refuse to Answer

**READ: INTERVIEWER READ TO THE RESPONDENT: Sometimes the purity of drugs on the street changes. So, I am going to ask you some questions about the changes you may have observed in the purity of drugs in the past 6 months.**

B323. In your opinion, in the last 6 months, has the purity of heroin increased, decreased or stayed the same in [LCITY]? (Choose one)

- 1 Increased
- 2 Decreased
- 3 Stayed the same
- 7 Don't Know
- 8 Refuse to Answer

B324. In your opinion, in the last 6 months, has the purity of methamphetamine increased, decreased or stayed the same in [LCITY]? (Choose one)

- 1 Increased
- 2 Decreased
- 3 Stayed the same
- 7 Don't Know
- 8 Refuse to Answer

B325. In your opinion, in the last 6 months, has the purity of powder cocaine increased, decreased or stayed the same in [LCITY]? (Choose one)

- 1 Increased
- 2 Decreased
- 3 Stayed the same
- 7 Don't Know
- 8 Refuse to Answer

B326. In your opinion, in the last 6 months, has the purity of crack cocaine increased, decreased or stayed the same in [LCITY]? (Choose one)

- 1 Increased
- 2 Decreased
- 3 Stayed the same
- 7 Don't Know
- 8 Refuse to Answer

B327. In your opinion, in the last 6 months, has the purity of OxyContin increased, decreased or stayed the same in [LCITY]? (Choose one)

- 1 Increased
- 2 Decreased
- 3 Stayed the same
- 7 Don't Know
- 8 Refuse to Answer

B328. In your opinion, in the last 6 months, has the purity of Fentanyl increased, decreased or stayed the same in [LCITY]? (Choose one)

- 1 Increased
- 2 Decreased
- 3 Stayed the same
- 7 Don't Know
- 8 Refuse to Answer

B329. In your opinion, in the last 6 months, has the purity of China White increased, decreased or stayed the same in [LCITY]? (Choose one)

- 1 Increased
- 2 Decreased
- 3 Stayed the same
- 7 Don't Know
- 8 Refuse to Answer

B330. In your opinion, in the last 6 months, has the purity of other prescription opioids increased, decreased or stayed the same in [LCITY]? (Choose one)

- 1 Increased
- 2 Decreased
- 3 Stayed the same
- 7 Don't Know
- 8 Refuse to Answer

B331. Do you think the purity of drugs is generally better or worse in Tijuana compared to San Diego? (Choose one)

- 1 Better
- 2 Worse
- 3 The same
- 7 Don't Know
- 8 Refuse to Answer

B332. Do you think the closure of the Mexico-US border affects the purity of drugs in San Diego?

- 1 Yes
- 0 No
- 7 Don't Know
- 8 Refuse to Answer

***If B332 is not equal to 1, then skip to B334.***

B333. Do you think the closure of the Mexico-US border makes the purity of drugs in San Diego better or worse? (Choose one)

- 1 Better
- 2 Worse
- 3 The same
- 7 Don't Know
- 8 Refuse to Answer

B334. Do you think the closure of the Mexico-US border affects the purity of drugs in Tijuana?

- 1 Yes
- 0 No
- 7 Don't Know
- 8 Refuse to Answer

***If B334 is not equal to 1, then skip to instruction before B336.***

B335. Do you think the closure of the Mexico-US border makes the purity of drugs in Tijuana better or worse? (Choose one)

- 1 Better
- 2 Worse
- 3 The same
- 7 Don't Know
- 8 Refuse to Answer

***READ: INTERVIEWER READ TO THE RESPONDENT: Now, Sometimes the availability of drugs on the street changes. So, I am going to ask you some questions about the changes you may have observed in the availability of drugs in the past 6 months. I will ask you about specific drugs and I would like your opinion even if you have not used a specific drug.***

B336. In your opinion, in the last 6 months, has the availability of heroin increased, decreased or stayed the same in [LCITY]? (Choose one)

- 1 Increased
- 2 Decreased
- 3 Stayed the same
- 7 Don't Know
- 8 Refuse to Answer

B337. In your opinion, in the last 6 months, has the availability of methamphetamine increased, decreased or stayed the same in [LCITY]? (Choose one)

- 1 Increased
- 2 Decreased
- 3 Stayed the same
- 7 Don't Know
- 8 Refuse to Answer

B338. In your opinion, in the last 6 months, has the availability of powder cocaine increased, decreased or stayed the same in [LCITY]? (Choose one)

- 1 Increased
- 2 Decreased
- 3 Stayed the same
- 7 Don't Know
- 8 Refuse to Answer

B339. In your opinion, in the last 6 months, has the availability of crack cocaine increased, decreased or stayed the same in [LCITY]? (Choose one)

- 1 Increased
- 2 Decreased
- 3 Stayed the same
- 7 Don't Know
- 8 Refuse to Answer

B340. In your opinion, in the last 6 months, has the availability of OxyContin increased, decreased or stayed the same in [LCITY]? (Choose one)

- 1 Increased
- 2 Decreased
- 3 Stayed the same
- 7 Don't Know
- 8 Refuse to Answer

B341. In your opinion, in the last 6 months, has the availability of Fentanyl increased, decreased or stayed the same in [LCITY]? (Choose one)

- 1 Increased
- 2 Decreased
- 3 Stayed the same
- 7 Don't Know
- 8 Refuse to Answer

B342. In your opinion, in the last 6 months, has the availability of China White increased, decreased or stayed the same in [LCITY]? (Choose one)

- 1 Increased
- 2 Decreased
- 3 Stayed the same
- 7 Don't Know
- 8 Refuse to Answer

B343. In your opinion, in the last 6 months, has the availability of other prescription opioids increased, decreased or stayed the same in [LCITY]? (Choose one)

- 1 Increased
- 2 Decreased
- 3 Stayed the same
- 7 Don't Know
- 8 Refuse to Answer

B344. Do you think the availability of drugs is generally better or worse in Tijuana compared to San Diego? (Choose one)

- 1 Better
- 2 Worse
- 3 The same
- 7 Don't Know
- 8 Refuse to Answer

B345. Do you think the closure of the Mexico-US border affects the availability of drugs in San Diego?

- 1 Yes
- 0 No
- 7 Don't Know
- 8 Refuse to Answer



***If B345 is not equal to 1, then skip to B347.***

B346. Do you think the closure of the Mexico-US border makes the availability of drugs in San Diego better or worse? (Choose one)

- 1 Better
- 2 Worse
- 3 The same
- 7 Don't Know
- 8 Refuse to Answer

B347. Do you think the closure of the Mexico-US border affects the availability of drugs in Tijuana?

- 1 Yes
- 0 No
- 7 Don't Know
- 8 Refuse to Answer

***If B347 is not equal to 1, then skip to B349.***

B348. Do you think the closure of the Mexico-US border makes the availability of drugs in Tijuana better or worse? (Choose one)

- 1 Better
- 2 Worse
- 3 The same
- 7 Don't Know
- 8 Refuse to Answer

B349. Are there drugs that were available before the COVID pandemic that are no longer sold in [LCITY]?

- 1 Yes
- 0 No
- 7 Don't Know
- 8 Refuse to Answer

*If B349 is not equal to 1, then skip to B364.*

B350. Is there black tar/heroin by itself that is no longer sold in [LCITY]?

- 1 Yes
- 0 No
- 7 Don't Know
- 8 Refuse to Answer

B351. Is there Powder heroin by itself that is no longer sold in [LCITY]?

- 1 Yes
- 0 No
- 7 Don't Know
- 8 Refuse to Answer

B352. Is there Powder Cocaine by itself that is no longer sold in [LCITY]?

- 1 Yes
- 0 No
- 7 Don't Know
- 8 Refuse to Answer

B353. Are there Heroin and cocaine together (speedball) that are no longer sold in [LCITY]?

- 1 Yes
- 0 No
- 7 Don't Know
- 8 Refuse to Answer

B354. Is there Methamphetamine/crystal by itself that is no longer sold in [LCITY]?

- 1 Yes
- 0 No
- 7 Don't Know
- 8 Refuse to Answer

B355. Is there Crack by itself that is no longer sold in [LCITY]?

- 1 Yes
- 0 No
- 7 Don't Know
- 8 Refuse to Answer

B356. Is there China White that is no longer sold in [LCITY]?

- 1 Yes
- 0 No
- 7 Don't Know
- 8 Refuse to Answer

B357. Is there OxyContin, without a prescription that is no longer sold in [LCITY]?

- 1 Yes
- 0 No
- 7 Don't Know
- 8 Refuse to Answer

B358. Are there Other prescription opioids w/o prescription (Vicodin, Darvon, Percocet) that is no longer sold in [LCITY]?

- 1 Yes
- 0 No
- 7 Don't Know
- 8 Refuse to Answer

B359. Are there Tranquilizers (Rivotril, Diazepam, Valium, Ativan or Restoril) that are no longer sold in [LCITY]?

- 1 Yes
- 0 No
- 7 Don't Know
- 8 Refuse to Answer

B360. Are there Barbiturates without a prescription (Amytal, Nembutal, and Seconal) that is no longer sold in [LCITY]?

- 1 Yes
- 0 No
- 7 Don't Know
- 8 Refuse to Answer

B361. Is there Fentanyl that is no longer sold in [LCITY]?

- 1 Yes
- 0 No
- 7 Don't Know
- 8 Refuse to Answer

B362. Are there Another drug or combination that was not already mentioned that is no longer sold in [LCITY]?

- 1 Yes
- 0 No
- 7 Don't Know
- 8 Refuse to Answer

***If B362 is equal to 1 then skip to B363***

***If not, then skip to B364.***

B363. Please specify the name of Another drug or combination that was not already mentioned.

-----

B364. Are there drugs or drug combinations that are available now in [LCITY], that weren't available before the COVID pandemic?

- 1 Yes
- 0 No
- 7 Don't Know
- 8 Refuse to Answer

*If B364 is not equal to 1, then skip to B379.*

B365. Is there black tar/heroin by itself available now in [LCITY]?

- 1 Yes
- 0 No
- 7 Don't Know
- 8 Refuse to Answer

B366. Is there Powder heroin by itself available now in [LCITY]?

- 1 Yes
- 0 No
- 7 Don't Know
- 8 Refuse to Answer

B367. Is there Powder Cocaine by itself available now in [LCITY]?

- 1 Yes
- 0 No
- 7 Don't Know
- 8 Refuse to Answer

B368. Are there heroin and cocaine together (speedball) available now in [LCITY]?

- 1 Yes
- 0 No
- 7 Don't Know
- 8 Refuse to Answer

B369. Is there Methamphetamine/crystal available now in [LCITY]?

- 1 Yes
- 0 No
- 7 Don't Know
- 8 Refuse to Answer

B370. Is there Crack by itself available now in [LCITY]?

- 1 Yes
- 0 No
- 7 Don't Know
- 8 Refuse to Answer

B371. Is there China White by itself available now in [LCITY]?

- 1 Yes
- 0 No
- 7 Don't Know
- 8 Refuse to Answer

B372. Is there OxyContin, without a prescription available now in [LCITY]?

- 1 Yes
- 0 No
- 7 Don't Know
- 8 Refuse to Answer

B373. Are there other prescription opioids w/o prescription (Vicodin, Darvon, Percocet) available now in [LCITY]?

- 1 Yes
- 0 No
- 7 Don't Know
- 8 Refuse to Answer

B374. Are there Tranquilizers (Rivotril, Diazepam, Valium, Ativan or Restoril) available now in [LCITY]?

- 1 Yes
- 0 No
- 7 Don't Know
- 8 Refuse to Answer

B375. Are there Barbiturates without a prescription (Amytal, Nembutal, and Seconal) available now in [LCITY]?

- 1 Yes
- 0 No
- 7 Don't Know
- 8 Refuse to Answer

B376. Is there Fentanyl available now in [LCITY]?

- 1 Yes
- 0 No
- 7 Don't Know
- 8 Refuse to Answer

B377. Another drug or combination that was not already mentioned available now in [LCITY]?

- 1 Yes
- 0 No
- 7 Don't Know
- 8 Refuse to Answer

*If B377 is equal to 1 then skip to B378*

*If not, then skip to B379.*

B378. Please specify the name of Another drug or combination that was not already mentioned.

-----

B379. Compared to before the COVID pandemic, in the past 6 months, have you been more or less likely to inject alone? (Choose one)

- 1 More
- 2 Less
- 3 Same
- 4 Not Applicable
- 8 Refuse to Answer



**MOBILITY**

*If DT\_SD is equal to 1 or NDT\_TJ is equal to 1 then skip to B380*

*If not, then skip to instruction before B382.*

B380. What country were you in, the first time you injected drugs? (Choose one)

- 1 US
- 2 Mexico
- 3 Other
- 8 Refuse to Answer

*If B380 is not equal to 3, then skip to instruction before B382.*

B381. Please specify other country

-----

*If DT\_SD is equal to 1 then skip to instruction before B382*

*If not, then skip to instruction before B433.*

**READ: INTERVIEWER READ TO THE RESPONDENT: The next set of questions will ask you about your experiences in Mexico. Remember, all of your responses are confidential.**

*If Q4 is equal to 1 then skip to B382*

*If not, then skip to instruction before B384.*

B382. Can you remind me when was the last time you went to Mexico?

**Interviewer: Ask for specific number of Days, months, years.**

- \_\_\_\_\_ YEARS
- \_\_\_\_\_ MONTHS
- \_\_\_\_\_ DAYS
- 998 Refuse to Answer (Months)

B383. When was the previous time (before last time) that you travelled to Mexico? **Interviewer: Ask for specific number of Days, months, years.**

\_\_\_ \_\_\_ YEARS  
 \_\_\_ \_\_\_ MONTHS  
 \_\_\_ \_\_\_ DAYS  
 998 Refuse to Answer (Months)

*If Q4 is equal to 2 then skip to B384*

*If not, then skip to instruction before B385.*

B384. When was the previous time (before today) that you travelled to Mexico? **Interviewer: Ask for specific number of Days, months, years.**

\_\_\_ \_\_\_ YEARS  
 \_\_\_ \_\_\_ MONTHS  
 \_\_\_ \_\_\_ DAYS  
 998 Refuse to Answer (Months)

*LSTMX = If(Q4 is equal to 2, 0, If(Q4 is equal to 1, B382, 999))*

*If LSTMX is greater than 6 and LSTMX is not equal to 998 then skip to B385*

*If not, then skip to instruction before B387.*

B385. The last time you were **in Mexico** which of the following things did you do with people who live there?  
**Interviewer: Read out the options and check all that apply** (Check all that apply)

- Visited friends
- Visited family
- Went to a pharmacy
- Used drugs (not injected)
- Injected drugs
- Bought drugs
- Sold drugs
- Bought needles
- Sold sex
- Bought sex
- Had sex with a female (not sex trade)
- Had sex with a male (not sex trade)
- Other
- I did not interact with anyone from Mexico
- Refuse to Answer

***If B385N is equal to 1 and B385A + B385B + B385C + B385D + B385E + B385F + B385G + B385H + B385I + B385J + B385K + B385L + B385M is greater than 0 then READ: "You can only choose the response "I did not interact with anyone" by itself. Please check responses." and skip to B385.***

***If B385M is not equal to 1, then skip to instruction before B387.***

B386. Please, specify

-----

***If LSTMX is less than 6 or LSTMX is equal to 6 then skip to B387***

***If not, then skip to B407.***



***If B390 is equal to 1 and B388A is not equal to 1 or B390 is equal to 2 and B388B is not equal to 1 or B390 is equal to 3 and B388C is not equal to 1 or B390 is equal to 4 and B388D is not equal to 1 or B390 is equal to 5 and B388E is not equal to 1 or B390 is equal to 6 and B388F is not equal to 1 or B390 is equal to 7 and B388G is not equal to 1 then READ: "Participant could only choose the most frequent city out of cities named before." and skip to B390.***

***If B390 is not equal to 7, then skip to B392.***

B391. Please specify what other city in Mexico

-----

B392. Which of the following activities did you do when you went to Mexico in the last 6 months?

**Interviewer: Read out the options and check all that apply (Check all that apply)**

- Visited friends
- Visited family
- Partied
- Bought drugs
- Used drugs
- Went to a shooting gallery
- Bought sex
- Sold sex
- Went to drug treatment
- Went to a pharmacy
- Other
- Refuse to Answer

***If B392K is not equal to 1, then skip to instruction before B394.***

B393. Please, specify an activity

-----

***If B392E is equal to 1 then skip to B394***

***If not, then skip to B396.***

B394. Why do you go to Mexico to use drugs? (Check all that apply)

- Cheaper drugs
- Better quality/better high
- Less likely to be hassled by police
- More widely available
- I know the scene and feel more comfortable there
- I can party/sex workers
- Other
- Refuse to Answer

***If B394G is not equal to 1, then skip to B396.***

B395. Please, specify other reasons

-----

B396. In the last 6 months, did you buy any of these things at a Pharmacy in Mexico?

**Interviewer: Read out the options and check all that apply**

(Check all that apply)

- Diazepam
- Viagra or Cialis
- Rivotril
- Fentanyl
- Syringes
- Antibiotics
- Valium
- Ativan
- Restoril
- Vicodin
- Amytal
- Seconal
- Darvon
- Percocet
- Other
- Refuse to Answer
- Not Applicable

***If B396O is not equal to 1, then skip to B398.***

B397. Please specify other drugs

-----

B398. In the last six months, did you pay someone like a jalador or a service to get drugs or buy sex in Mexico?

- 1 Yes
- 0 No
- 8 Refuse to Answer

B399. In the last six months, did you buy preloaded syringes with drugs in Mexico?

- 1 Yes
- 0 No
- 8 Refuse to Answer

***If B388A is equal to 1 or B390 is equal to 1 then skip to B400***

***If not, then skip to B404.***

B400. In the last six months, which part of town (i.e., Colonias) did you hang out when you went to TJ?  
**Interviewer: Look for locations in map as indicated by participant, check all that apply** (Check all that apply)

- \_\_\_ Zona Norte
- \_\_\_ La Mesa
- \_\_\_ El Florido
- \_\_\_ Playas de Tijuana
- \_\_\_ 5 y 10
- \_\_\_ Otay
- \_\_\_ Other
- \_\_\_ Don't Know
- \_\_\_ Refuse to Answer

***If B400G is not equal to 1, then skip to instruction before B402.***

B401. Please specify which other part of town/colonia:

-----



**If B400A + B400B + B400C + B400D + B400E + B400F + B400G is equal to 1 or B400 is equal to 97 or B400 is equal to 98 or B400 is equal to 99, then skip to B404.**

B402. In the last six months, what part of town (i.e., Colonias) did you hang out most frequently when you went to TJ?

**Interviewer: Look for location on map and have participant point location.** (Choose one)

- 01 Zona Norte
- 02 La Mesa
- 03 El Florido
- 04 Playas de Tijuana
- 05 5 y 10
- 06 Otay
- 07 Other
- 97 Don't Know
- 98 Refuse to Answer

**If B402 is equal to 1 and B400A is not equal to 1 or B402 is equal to 2 and B400B is not equal to 1 or B402 is equal to 3 and B400C is not equal to 1 or B402 is equal to 4 and B400D is not equal to 1 or B402 is equal to 5 and B400E is not equal to 1 or B402 is equal to 6 and B400F is not equal to 1 or B402 is equal to 7 and B400G is not equal to 1 then READ: "Participant could only choose the most frequent colonia out of colonias named before." and skip to B402.**

**If B402 is not equal to 7, then skip to B404.**

B403. Please specify which other part of town/colonia:

-----

B404. In the last six months, when you went to Mexico, what kinds of places did you spend time in?

**Interviewer: Read out the options and check all that apply** (Check all that apply)

- My home (home defined in demographics section)
- Someone else's home
- Shooting gallery
- Cafe
- Restaurant
- Hotel
- Motel
- Outside location (Construction site, Alleyway, on the street, vacant lot, park, freeway overpass/bridge, canal)
- Bar/club
- Brothel
- Strip club
- Public restroom
- Park
- Other
- Refuse to Answer

***If B404N is not equal to 1, then skip to B406.***

B405. Please specify other place

-----

B406. On average, how long did you stay in Mexico when you visited each time in the last 6 months?

\_\_\_\_ MONTHS

\_\_\_\_ DAYS

\_\_\_\_ HOURS

998 Refuse to Answer (Days)

B407. Compared to before the COVID pandemic, in the past 6 months, how much more or less often do you travel to Mexico and use or buy drugs? (Choose one)

- 1 More
- 2 Less
- 3 Same
- 8 Refuse to Answer

***If B387 is equal to 0 or B387 is equal to 998 or LSTMX is greater than 6, then skip to instruction before B433.***

***READ: INTERVIEWER READ TO THE RESPONDENT: Now I would like you to think about your experiences with people from Mexico while you were in Mexico in the last 6 months.***

B408. In the last 6 months, which of the following have you done in Mexico with people who live there?  
**Interviewer: Read out the options and check all that apply** (Check all that apply)

- Used drugs (not injected)
- Injected drugs with them
- Bought drugs
- Sold drugs
- Bought needles
- Sold sex
- Bought sex
- Had sex with a female (not sex trade)
- Had sex with a male (not sex trade)
- Other
- I did not interact with anyone from Mexico
- Refuse to Answer

***If B408K is equal to 1 and B408A + B408B + B408C + B408D + B408E + B408F + B408G + B408H + B408I + B408J is greater than 0 then READ: "You can only choose the response "I did not interact with anyone" by itself. Please check responses." and skip to B408.***

**If B408J is not equal to 1, then skip to instruction before B410.**

B409. Please, specify an activity

-----

**If B408A is not equal to 1, then skip to instruction before B419.**

B410. In the **last 6 months**, when you were in Mexico, how many different people did you **use drugs** (not inject) with that live there?

|     |                  |
|-----|------------------|
| ___ | # of people      |
| 98  | Refuse to Answer |

**If B410 is equal to 0 or B410 is equal to 98, then skip to instruction before B419.**

**READ: INTERVIEWER READ TO THE RESPONDENT: The next questions refer to the people who live in Mexico that you used non-injection drugs within the past 6 months in Mexico.**

B411. What was your relationship to them?

**Interviewer: Read out the options and check all that apply** (Check all that apply)

- \_\_\_ Family member
- \_\_\_ Friend
- \_\_\_ Sex partner (not from sex trade)
- \_\_\_ Sex trade Client (paying partner)
- \_\_\_ Acquaintance
- \_\_\_ Stranger
- \_\_\_ Other
- \_\_\_ Refuse to Answer

**If B411G is not equal to 1, then skip to B413.**

B412. Please specify other.

-----

B413. Where did you meet these people? (Check all that apply)

- Their home (home defined in demographics section)
- Shooting gallery
- Cafe/Restaurant
- Motel/Hotel
- Outside location (Construction site, Alleyway, on the street, vacant lot, park, freeway overpass/bridge, canal)
- Bar/club
- Brothel
- Strip club
- Public restroom
- Park
- Other
- Refuse to Answer

***If B413K is not equal to 1, then skip to B415.***

B414. Please specify other place

-----

B415. What drugs did you use (not inject) with them? (Check all that apply)

- Black tar/Heroin by itself
- Powder heroin by itself
- Cocaine (powder) by itself
- Heroin and cocaine together (speedball)
- Methamphetamine/crystal
- Crack by itself
- China White by itself
- OxyContin, without a prescription
- Other prescription opioids w/o prescription (Vicodin, Darvon, Percocet)
- Tranquilizers (Rivotril, Diazepam, Valium, Ativan or Restoril)
- Barbiturates without a prescription (Amytal, Nembutal, and Seconal)
- Fentanyl
- Another drug or combination that was not already mentioned
- Refuse to Answer

***If B415M is not equal to 1, then skip to B417.***

B416. Please specify another drug or combination:

-----

B417. Did you give or lend any drug use equipment to them, like a pipe or straw? (Choose one)

- 0 No
- 1 Yes
- 2 We didn't use a pipe or straw
- 8 Refuse to Answer

***If B417 is equal to 2, then skip to instruction before B419.***

- B418. Did you use a pipe or straw after any of them?
- |  |   |                  |
|--|---|------------------|
|  | 1 | Yes              |
|  | 0 | No               |
|  | 8 | Refuse to Answer |

***If B408B is not equal to 1, then skip to B429.***

- B419. In the **last 6 months**, when you were in Mexico, how many different people did you **inject drugs** with there?

|     |                  |
|-----|------------------|
| — — | # of people      |
| 98  | Refuse to Answer |

***If B419 is equal to 0 or B419 is equal to 98, then skip to B429.***

***READ: INTERVIEWER READ TO THE RESPONDENT: The next questions refer to the people who live in Mexico that you injected drugs with in the past 6 months in Mexico.***

- B420. What was your relationship to them?

**Interviewer: Read out the options and check all that apply** (Check all that apply)

- |   |                                   |
|---|-----------------------------------|
| — | Family member                     |
| — | Friend                            |
| — | Sex partner (not from sex trade)  |
| — | Sex trade Client (paying partner) |
| — | Acquaintance                      |
| — | Stranger                          |
| — | Other                             |
| — | Refuse to Answer                  |

***If B420G is not equal to 1, then skip to B422.***

- B421. Please specify other.

-----

B422. Where did you meet these people? (Check all that apply)

- Their home (home defined in demographics section)
- Shooting gallery
- Outside location (Construction site, Alleyway, on the street, vacant lot, park, freeway overpass/bridge, canal)
- Bar/club
- Brothel
- Strip club
- Public restroom
- Park
- Other
- Refuse to Answer

***If B422I is not equal to 1, then skip to B424.***

B423. Please specify other place

-----



B424. What drugs did you inject with them? (Check all that apply)

- Black tar/Heroin by itself
- Powder heroin by itself
- Cocaine (powder) by itself
- Heroin and cocaine together (speedball)
- Methamphetamine/crystal
- Crack by itself
- China White by itself
- OxyContin, without a prescription
- Other prescription opioids w/o prescription (Vicodin, Darvon, Percocet)
- Tranquilizers (Rivotril, Diazepam, Valium, Ativan or Restoril)
- Barbiturates without a prescription (Amytal, Nembutal, and Seconal)
- Fentanyl
- Another drug or combination that was not already mentioned
- Refuse to Answer

***If B424M is not equal to 1, then skip to B426.***

B425. Please specify another drug or combination:

-----

B426. Did you give or lend your syringe to any of these people to inject with after you used it?

- 1 Yes
- 0 No
- 8 Refuse to Answer

B427. Did you inject with a syringe that any of these people used before you used it to inject?

- 1 Yes
- 0 No
- 8 Refuse to Answer

B428. Did you use a cooker, cotton, or water after or at the same time as the other people you were with?

- 1 Yes
- 0 No
- 8 Refuse to Answer

B429. In the **last 6 months**, when you went to Mexico how many people did you give drugs, money, food, shelter, transportation, alcohol, or anything else in exchange for having sex with you?

- — # of people
- 98 Refuse to Answer

B430. Compared to before the COVID pandemic, in the past 6 months when you were in Mexico, have you given drugs, money or anything else in exchange for having sex with you more or less often than before? (Choose one)

- 1 More
- 2 Less
- 3 Same
- 4 N/A (never)
- 8 Refuse to Answer

B431. In the **last 6 months**, when you went to Mexico how many people have given you drugs, money, food, shelter, transportation, alcohol, or anything else in exchange for sex?

- — # of people
- 98 Refuse to Answer

B432. Compared to before the COVID pandemic, in the past 6 months when you were in Mexico, has someone given you money, drugs or anything else in exchange for having sex with them more or less often?  
(Choose one)

- 1 More
- 2 Less
- 3 Same
- 4 N/A (never)
- 8 Refuse to Answer

**DRUG USE by SD DT in Mexico**

*If DT\_SD is not equal to 1, then skip to B625.*

**READ: INTERVIEWER READ TO THE RESPONDENT: Now I will ask you some questions about your drug use in Mexico. Some of these questions will ask you for details that can be difficult to remember. Please do your best to give an answer even if it is your best guess. Recall that we will not share your answers with the police or anyone else outside of this study.**

***If you were in prison/jail in the past 6 months please only think of the time when you were not in prison/jail to answer these questions.***

*If LSTMX is greater than 6 and LSTMX is not equal to 998, then skip to B434.*

B433. During the last 6 months, when you were in Mexico, on average how often did you smoke, vape marijuana or hashish by itself? (Choose one)

- 00 Never
- 01 One time per month or less
- 02 2 to 3 days per month
- 03 One time per week
- 04 2 to 3 days per week
- 05 4 to 6 days per week
- 06 One time per day
- 07 2-3 times per day
- 08 4 times or more per day
- 98 Refuse to Answer

B434. Have you ever used heroin/black tar when you were in Mexico?

- 1 Yes
- 0 No
- 8 Refuse to Answer

*If B434 is not equal to 1, then skip to B448.*

B435. Have you ever smoked, snorted or inhaled heroin when you were in Mexico?

- 1 Yes
- 0 No
- 8 Refuse to Answer

***If B435 is not equal to 1, then skip to B438.***

B436. When was the last time you smoked, snorted, or inhaled heroin in Mexico?

- \_\_\_ \_\_\_ \_\_\_ YEARS
- \_\_\_ \_\_\_ MONTHS
- \_\_\_ \_\_\_ DAYS
- 998 Refuse to Answer (Months)
- 999 Not Applicable (Months)

***If B436 is less than LSTMX then READ: "The response is smaller than the last time participant went to Mexico. Please check the response." and skip to B436.***

***If B436 is equal to 998 or B436 is equal to 999 or B436 is greater than 6, then skip to B438.***

B437. During the last 6 months, on average how often have you smoked, snorted, or inhaled heroin when you were in Mexico? (Choose one)

- 00 Never
- 01 One time per month or less
- 02 2 to 3 days per month
- 03 One time per week
- 04 2 to 3 days per week
- 05 4 to 6 days per week
- 06 One time per day
- 07 2-3 times per day
- 08 4 times or more per day
- 98 Refuse to Answer

B438. Have you ever injected heroin by itself when you were in Mexico?

- 1 Yes
- 0 No
- 8 Refuse to Answer

***If B438 is not equal to 1, then skip to instruction before B441.***

B439. When was the last time you injected heroin by itself in Mexico?

- \_\_\_ \_\_ \_\_ YEARS
- \_\_\_ \_\_ \_\_ MONTHS
- \_\_\_ \_\_ \_\_ DAYS
- 998 Refuse to Answer (Months)
- 999 Not Applicable (Months)

***If B439 is less than LSTMX then READ: "The response is smaller than the last time participant went to Mexico. Please check the response." and skip to B439.***

***If B439 is equal to 998 or B439 is equal to 999 or B439 is greater than 6, then skip to instruction before B441.***

B440. During the last 6 months, on average how often have you injected heroin by itself when you were in Mexico? (Choose one)

- 00 Never
- 01 One time per month or less
- 02 2 to 3 days per month
- 03 One time per week
- 04 2 to 3 days per week
- 05 4 to 6 days per week
- 06 One time per day
- 07 2-3 times per day
- 08 4 times or more per day
- 98 Refuse to Answer

***If (B436 is equal to 998 or B436 is equal to 999 or B436 is greater than 6) and (B439 is equal to 998 or B439 is equal to 999 or B439 is greater than 6), then skip to B448.***

B441. In the last 6 months, what colors did the heroin you used come in when you were in Mexico?  
**Interviewer: Read out the options and check all that apply** (Check all that apply)

- Black tar
- Brown powder
- White powder
- Yellow powder
- Orange powder
- Other
- Refuse to Answer
- Not Applicable

***If B441F is not equal to 1, then skip to instruction before B443.***

B442. Please, specify the color of the heroin you used.

-----

*If B439 is equal to 998 or B439 is equal to 999 or B439 is greater than 6, then skip to B448.*

B443. In the last 6 months, what color was the heroin you injected **most often** when you were in Mexico?  
(Choose one)

- 1 Black tar
- 2 Brown powder
- 3 White powder
- 4 Yellow powder
- 5 Orange powder
- 6 Other
- 8 Refuse to Answer
- 9 Not Applicable

*If B443 is not equal to 6, then skip to instruction before B445.*

B444. Please, specify the color of the heroin you inject.

-----

*If B443 is not equal to 4, then skip to instruction before B446.*

B445. During the last 6 months when you injected heroin when you were in Mexico, on average how often was it **yellow**? (Choose one)

- 1 Never
- 2 Less than half the time
- 3 About half of the time
- 4 More than half the time
- 5 Always
- 8 Refuse to Answer



***If B443 is not equal to 5, then skip to instruction before B447.***

B446. During the last 6 months when you injected heroin when you were in Mexico, on average how often was it **orange** heroin? (Choose one)

- |   |                         |
|---|-------------------------|
| 1 | Never                   |
| 2 | Less than half the time |
| 3 | About half of the time  |
| 4 | More than half the time |
| 5 | Always                  |
| 8 | Refuse to Answer        |

***If B443 is not equal to 6, then skip to B448.***

B447. During the last 6 months when you injected heroin when you were in Mexico, on average how often was it [Response to B444]? (Choose one)

- |   |                         |
|---|-------------------------|
| 1 | Never                   |
| 2 | Less than half the time |
| 3 | About half of the time  |
| 4 | More than half the time |
| 5 | Always                  |
| 8 | Refuse to Answer        |

B448. Have you ever used cocaine or crack when you were in Mexico?

- |   |                  |
|---|------------------|
| 1 | Yes              |
| 0 | No               |
| 8 | Refuse to Answer |

***If B448 is not equal to 1, then skip to B458.***

B449. Have you ever smoked, snorted or inhaled crack or powder cocaine when you were in Mexico?

- 1 Yes
- 0 No
- 8 Refuse to Answer

***If B449 is not equal to 1, then skip to B452.***

B450. When was the last time you smoked, snorted, or inhaled cocaine in Mexico?

- \_\_\_ \_\_\_ \_\_\_ YEARS
- \_\_\_ \_\_\_ \_\_\_ MONTHS
- \_\_\_ \_\_\_ \_\_\_ DAYS
- 998 Refuse to Answer (Months)
- 999 Not Applicable (Months)

***If B450 is less than LSTMX then READ: "The response is smaller than the last time participant went to Mexico. Please check the response." and skip to B450.***

***If B450 is equal to 998 or B450 is equal to 999 or B450 is greater than 6, then skip to B452.***

B451. During the last 6 months, on average how often have you smoked, snorted, or inhaled cocaine when you were in Mexico? (Choose one)

- 00 Never
- 01 One time per month or less
- 02 2 to 3 days per month
- 03 One time per week
- 04 2 to 3 days per week
- 05 4 to 6 days per week
- 06 One time per day
- 07 2-3 times per day
- 08 4 times or more per day
- 98 Refuse to Answer

B452. Have you ever injected cocaine by itself when you were in Mexico?

- 1 Yes
- 0 No
- 8 Refuse to Answer

***If B452 is not equal to 1, then skip to instruction before B455.***

B453. When was the last time you injected cocaine by itself in Mexico?

- \_\_\_ \_\_ \_\_ YEARS
- \_\_\_ \_\_ \_\_ MONTHS
- \_\_\_ \_\_ \_\_ DAYS
- 998 Refuse to Answer (Months)
- 999 Not Applicable (Months)

***If B453 is less than LSTMX then READ: "The response is smaller than the last time participant went to Mexico. Please check the response." and skip to B453.***

***If B453 is equal to 998 or B453 is equal to 999 or B453 is greater than 6, then skip to instruction before B455.***

B454. During the last 6 months, on average how often have you injected cocaine by itself when you were in Mexico? (Choose one)

- 00 Never
- 01 One time per month or less
- 02 2 to 3 days per month
- 03 One time per week
- 04 2 to 3 days per week
- 05 4 to 6 days per week
- 06 One time per day
- 07 2-3 times per day
- 08 4 times or more per day
- 98 Refuse to Answer

***If B434 is not equal to 1, then skip to B458.***

B455. Have you ever injected heroin and cocaine together (speedball) when you were in Mexico?

- 1 Yes
- 0 No
- 8 Refuse to Answer

***If B455 is not equal to 1, then skip to B458.***

B456. When was the last time you injected heroin and cocaine together (speedball) when you were in Mexico?

- \_\_\_ \_\_\_ YEARS
- \_\_\_ \_\_\_ MONTHS
- \_\_\_ \_\_\_ DAYS
- 998 Refuse to Answer (Months)
- 999 Not Applicable (Months)

**If B456 is less than LSTMX then READ: "The response is smaller than the last time participant went to Mexico. Please check the response." and skip to B456.**

**If B456 is equal to 998 or B456 is equal to 999 or B456 is greater than 6, then skip to B458.**

B457. During the last 6 months, on average how often have you injected heroin and cocaine together (speedball) when you were in Mexico? (Choose one)

- 00 Never
- 01 One time per month or less
- 02 2 to 3 days per month
- 03 One time per week
- 04 2 to 3 days per week
- 05 4 to 6 days per week
- 06 One time per day
- 07 2-3 times per day
- 08 4 times or more per day
- 98 Refuse to Answer

B458. Have you ever used methamphetamine/crystal when you were in Mexico?

- 1 Yes
- 0 No
- 8 Refuse to Answer

**If B458 is not equal to 1, then skip to B475.**

B459. Have you ever smoked, snorted, inhaled or vaped meth/crystal by itself when you were in Mexico?

- 1 Yes
- 0 No
- 8 Refuse to Answer

**If B459 is not equal to 1, then skip to B462.**

B460. When was the last time you smoked, snorted, or inhaled meth/crystal in Mexico?

- |         |                           |
|---------|---------------------------|
| ___ ___ | YEARS                     |
| ___ ___ | MONTHS                    |
| ___ ___ | DAYS                      |
| 998     | Refuse to Answer (Months) |
| 999     | Not Applicable (Months)   |

***If B460 is less than LSTMX then READ: "The response is smaller than the last time participant went to Mexico. Please check the response." and skip to B460.***

***If B460 is equal to 998 or B460 is equal to 999 or B460 is greater than 6, then skip to B462.***

B461. During the last 6 months, on average how often have you smoked, snorted, or inhaled meth/crystal when you were in Mexico? (Choose one)

- |    |                            |
|----|----------------------------|
| 00 | Never                      |
| 01 | One time per month or less |
| 02 | 2 to 3 days per month      |
| 03 | One time per week          |
| 04 | 2 to 3 days per week       |
| 05 | 4 to 6 days per week       |
| 06 | One time per day           |
| 07 | 2-3 times per day          |
| 08 | 4 times or more per day    |
| 98 | Refuse to Answer           |

B462. Have you ever injected meth/crystal by itself when you were in Mexico?

- |   |                  |
|---|------------------|
| 1 | Yes              |
| 0 | No               |
| 8 | Refuse to Answer |

***If B462 is not equal to 1, then skip to instruction before B465.***

B463. When was the last time you injected meth/crystal in Mexico?

- \_\_\_ \_\_\_ YEARS
- \_\_\_ \_\_\_ MONTHS
- \_\_\_ \_\_\_ DAYS
- 998 Refuse to Answer (Months)
- 999 Not Applicable (Months)

***If B463 is less than LSTMX then READ: "The response is smaller than the last time participant went to Mexico. Please check the response." and skip to B463.***

***If B463 is equal to 998 or B463 is equal to 999 or B463 is greater than 6, then skip to instruction before B465.***

B464. During the last 6 months, on average how often have you injected meth/crystal by itself when you were in Mexico? (Choose one)

- 00 Never
- 01 One time per month or less
- 02 2 to 3 days per month
- 03 One time per week
- 04 2 to 3 days per week
- 05 4 to 6 days per week
- 06 One time per day
- 07 2-3 times per day
- 08 4 times or more per day
- 98 Refuse to Answer

***If B448 is not equal to 1, then skip to instruction before B468.***

B465. Have you ever injected meth/crystal and cocaine together when you were in Mexico?

- 1 Yes
- 0 No
- 8 Refuse to Answer

***If B465 is not equal to 1, then skip to instruction before B468.***

B466. When was the last time you injected meth/crystal and cocaine together when you were in Mexico?

- \_\_\_ \_\_\_ YEARS
- \_\_\_ \_\_\_ MONTHS
- \_\_\_ \_\_\_ DAYS
- 998 Refuse to Answer (Months)
- 999 Not Applicable (Months)

***If B466 is less than LSTMX then READ: "The response is smaller than the last time participant went to Mexico. Please check the response." and skip to B466.***

***If B466 is equal to 998 or B466 is equal to 999 or B466 is greater than 6, then skip to instruction before B468.***



B467. During the last 6 months, on average how often have you injected meth/crystal and cocaine together when you were in Mexico? (Choose one)

- 00 Never
- 01 One time per month or less
- 02 2 to 3 days per month
- 03 One time per week
- 04 2 to 3 days per week
- 05 4 to 6 days per week
- 06 One time per day
- 07 2-3 times per day
- 08 4 times or more per day
- 98 Refuse to Answer

***If B434 is not equal to 1, then skip to instruction before B471.***

B468. Have you ever injected meth/crystal and heroin together when you were in Mexico?

- 1 Yes
- 0 No
- 8 Refuse to Answer

***If B468 is not equal to 1, then skip to instruction before B471.***

B469. When was the last time you injected meth/crystal and heroin together when you were in Mexico?

- \_\_\_ \_\_\_ YEARS
- \_\_\_ \_\_\_ MONTHS
- \_\_\_ \_\_\_ DAYS
- 998 Refuse to Answer (Months)
- 999 Not Applicable (Months)

***If B469 is less than LSTMX then READ: "The response is smaller than the last time participant went to Mexico. Please check the response." and skip to B469.***

***If B469 is equal to 998 or B469 is equal to 999 or B469 is greater than 6, then skip to instruction before B471.***

B470. During the last 6 months, on average how often have you injected meth/crystal and heroin together when you were in Mexico? (Choose one)

- |    |                            |
|----|----------------------------|
| 00 | Never                      |
| 01 | One time per month or less |
| 02 | 2 to 3 days per month      |
| 03 | One time per week          |
| 04 | 2 to 3 days per week       |
| 05 | 4 to 6 days per week       |
| 06 | One time per day           |
| 07 | 2-3 times per day          |
| 08 | 4 times or more per day    |
| 98 | Refuse to Answer           |

***If (B460 is equal to 998 or B460 is equal to 999 or B460 is greater than 6) and (B463 is equal to 998 or B463 is equal to 999 or B463 is greater than 6) and (B466 is equal to 998 or B466 is equal to 999 or B466 is greater than 6) and (B469 is equal to 998 or B469 is equal to 999 or B469 is greater than 6), then skip to B475.***

B471. In the last 6 months when you used methamphetamine when you were in Mexico, what color was it?  
(Check all that apply)

- White
- Pink
- Green
- Black
- Yellow
- Clear (ice)
- Other
- Refuse to Answer
- Not Applicable

*If B471G is not equal to 1, then skip to instruction before B473.*

B472. Please, specify the color of methamphetamine when you were in Mexico:

-----

*If (B463 is equal to 998 or B463 is equal to 999 or B463 is greater than 6) and (B466 is equal to 998 or B466 is equal to 999 or B466 is greater than 6) and (B469 is equal to 998 or B469 is equal to 999 or B469 is greater than 6), then skip to B475.*

B473. In the last 6 months when you injected methamphetamine when you were in Mexico, what was the color you injected **most often**? (Choose one)

- 1 White
- 2 Pink
- 3 Green
- 4 Black
- 5 Yellow
- 6 Clear (ice)
- 7 Other
- 8 Refuse to Answer
- 9 Not Applicable

*If B473 is not equal to 7, then skip to B475.*

B474. Please, specify the color of methamphetamine

-----

- B475. Have you ever used China White when you were in Mexico?
- 1 Yes
  - 0 No
  - 8 Refuse to Answer

*If B475 is not equal to 1, then skip to B485.*

B476. Have you ever smoked, snorted, inhaled or vaped China White when you were in Mexico?

- 1 Yes
- 0 No
- 8 Refuse to Answer

*If B476 is not equal to 1, then skip to B479.*

B477. When was the last time you smoked, snorted, or inhaled China White in Mexico?

- |       |                           |
|-------|---------------------------|
| — — — | YEARS                     |
| — — — | MONTHS                    |
| — — — | DAYS                      |
| 998   | Refuse to Answer (Months) |
| 999   | Not Applicable (Months)   |

***If B477 is less than LSTMX then READ: "The response is smaller than the last time participant went to Mexico. Please check the response." and skip to B477.***

***If B477 is equal to 998 or B477 is equal to 999 or B477 is greater than 6, then skip to B479.***

B478. During the last 6 months, on average how often have you smoked, snorted, or inhaled China White when you were in Mexico? (Choose one)

- |    |                            |
|----|----------------------------|
| 00 | Never                      |
| 01 | One time per month or less |
| 02 | 2 to 3 days per month      |
| 03 | One time per week          |
| 04 | 2 to 3 days per week       |
| 05 | 4 to 6 days per week       |
| 06 | One time per day           |
| 07 | 2-3 times per day          |
| 08 | 4 times or more per day    |
| 98 | Refuse to Answer           |

B479. Have you ever injected China White by itself when you were in Mexico?

|   |                  |
|---|------------------|
| 1 | Yes              |
| 0 | No               |
| 8 | Refuse to Answer |

***If B479 is not equal to 1, then skip to instruction before B482.***

B480. When was the last time you injected China White in Mexico?

- \_\_\_ \_\_\_ YEARS
- \_\_\_ \_\_\_ MONTHS
- \_\_\_ \_\_\_ DAYS
- 998 Refuse to Answer (Months)
- 999 Not Applicable (Months)

***If B480 is less than LSTMX then READ: "The response is smaller than the last time participant went to Mexico. Please check the response." and skip to B480.***

***If B480 is equal to 998 or B480 is equal to 999 or B480 is greater than 6, then skip to instruction before B482.***

B481. During the last 6 months, on average how often have you injected China White when you were in Mexico? (Choose one)

- 00 Never
- 01 One time per month or less
- 02 2 to 3 days per month
- 03 One time per week
- 04 2 to 3 days per week
- 05 4 to 6 days per week
- 06 One time per day
- 07 2-3 times per day
- 08 4 times or more per day
- 98 Refuse to Answer

***If B458 is not equal to 1, then skip to B485.***

B482. Have you ever injected China White and meth/crystal together when you were in Mexico?

- 1 Yes
- 0 No
- 8 Refuse to Answer

***If B482 is not equal to 1, then skip to B485.***

B483. When was the last time you injected China White and meth/crystal together when you were in Mexico?

- \_\_\_ \_\_\_ YEARS
- \_\_\_ \_\_\_ MONTHS
- \_\_\_ \_\_\_ DAYS
- 998 Refuse to Answer (Months)
- 999 Not Applicable (Months)

***If B483 is less than LSTMX then READ: "The response is smaller than the last time participant went to Mexico. Please check the response." and skip to B483.***

***If B483 is equal to 998 or B483 is equal to 999 or B483 is greater than 6, then skip to B485.***

B484. During the last 6 months, on average how often have you injected China White and meth/crystal together when you were in Mexico? (Choose one)

- 00 Never
- 01 One time per month or less
- 02 2 to 3 days per month
- 03 One time per week
- 04 2 to 3 days per week
- 05 4 to 6 days per week
- 06 One time per day
- 07 2-3 times per day
- 08 4 times or more per day
- 98 Refuse to Answer

B485. Have you ever used Fentanyl when you were in Mexico?

- 1 Yes
- 0 No
- 8 Refuse to Answer

***If B485 is not equal to 1, then skip to B492.***

B486. When was the last time you used Fentanyl in Mexico?

- \_\_ \_\_ \_\_ YEARS
- \_\_ \_\_ \_\_ MONTHS
- \_\_ \_\_ \_\_ DAYS
- 998 Refuse to Answer (Months)
- 999 Not Applicable (Months)

***If B486 is less than LSTMX then READ: "The response is smaller than the last time participant went to Mexico. Please check the response." and skip to B486.***

***If B486 is equal to 998 or B486 is equal to 999 or B486 is greater than 6, then skip to B492.***



B487. In the past 6 months, have you smoked, inhaled, snorted or vaped Fentanyl in Mexico?

- |   |                  |
|---|------------------|
| 1 | Yes              |
| 0 | No               |
| 8 | Refuse to Answer |

***If B487 is not equal to 1, then skip to B489.***

B488. During the last 6 months, on average how often have you smoked, snorted, or inhaled Fentanyl when you were in Mexico? (Choose one)

- |    |                            |
|----|----------------------------|
| 00 | Never                      |
| 01 | One time per month or less |
| 02 | 2 to 3 days per month      |
| 03 | One time per week          |
| 04 | 2 to 3 days per week       |
| 05 | 4 to 6 days per week       |
| 06 | One time per day           |
| 07 | 2-3 times per day          |
| 08 | 4 times or more per day    |
| 98 | Refuse to Answer           |

B489. In the past 6 months, have you inject Fentanyl in Mexico?

- |   |                  |
|---|------------------|
| 1 | Yes              |
| 0 | No               |
| 8 | Refuse to Answer |

***If B489 is not equal to 1, then skip to instruction before B491.***

B490. During the last 6 months, on average how often have you inject Fentanyl by itself when you were in Mexico? (Choose one)

- 00 Never
- 01 One time per month or less
- 02 2 to 3 days per month
- 03 One time per week
- 04 2 to 3 days per week
- 05 4 to 6 days per week
- 06 One time per day
- 07 2-3 times per day
- 08 4 times or more per day
- 98 Refuse to Answer

***If B458 is not equal to 1, then skip to B492.***

B491. During the last 6 months, on average how often have you injected Fentanyl and Meth/Crystal together when you were in Mexico? (Choose one)

- 00 Never
- 01 One time per month or less
- 02 2 to 3 days per month
- 03 One time per week
- 04 2 to 3 days per week
- 05 4 to 6 days per week
- 06 One time per day
- 07 2-3 times per day
- 08 4 times or more per day
- 98 Refuse to Answer

- B492. Have you ever used PCP/Angel Dust when you were in Mexico?
- |  |   |                  |
|--|---|------------------|
|  | 1 | Yes              |
|  | 0 | No               |
|  | 8 | Refuse to Answer |

***If B492 is not equal to 1, then skip to B495.***

- B493. When was the last time you smoked, snorted or inhaled PCP/Angel Dust in Mexico?
- |        |     |                           |
|--------|-----|---------------------------|
| ___ __ |     | YEARS                     |
| ___ __ |     | MONTHS                    |
| ___ __ |     | DAYS                      |
|        | 998 | Refuse to Answer (Months) |
|        | 999 | Not Applicable (Months)   |

***If B493 is less than LSTMX then READ: "The response is smaller than the last time participant went to Mexico. Please check the response." and skip to B493.***

***If B493 is equal to 998 or B493 is equal to 999 or B493 is greater than 6, then skip to B495.***

- B494. During the last 6 months when you used PCP/Angel Dust in Mexico, on average how often did you smoke, inhale, or vape it? (Choose one)

- |    |                            |
|----|----------------------------|
| 00 | Never                      |
| 01 | One time per month or less |
| 02 | 2 to 3 days per month      |
| 03 | One time per week          |
| 04 | 2 to 3 days per week       |
| 05 | 4 to 6 days per week       |
| 06 | One time per day           |
| 07 | 2-3 times per day          |
| 08 | 4 times or more per day    |
| 98 | Refuse to Answer           |

- B495. Have you ever used Ecstasy when you were in Mexico?
- |  |   |                  |
|--|---|------------------|
|  | 1 | Yes              |
|  | 0 | No               |
|  | 8 | Refuse to Answer |

***If B495 is not equal to 1, then skip to B501.***

- B496. When was the last time you used ecstasy in Mexico?
- |         |  |                           |
|---------|--|---------------------------|
| ___ ___ |  | YEARS                     |
| ___ ___ |  | MONTHS                    |
| ___ ___ |  | DAYS                      |
| 998     |  | Refuse to Answer (Months) |
| 999     |  | Not Applicable (Months)   |

***If B496 is less than LSTMX then READ: "The response is smaller than the last time participant went to Mexico. Please check the response." and skip to B496.***

***If B496 is equal to 998 or B496 is equal to 999 or B496 is greater than 6, then skip to B501.***

- B497. During the last 6 months when you used ecstasy in Mexico, how did you use it?  
**Interviewer: If the participant indicates that they did not use ecstasy in Mexico in the past 6 months, then check Not Applicable (Check all that apply)**

- |     |                  |
|-----|------------------|
| ___ | Injecting        |
| ___ | Smoking/chasing  |
| ___ | Snorting         |
| ___ | Inhaling         |
| ___ | Swallowing       |
| ___ | Rectally/bumping |
| ___ | Other            |
| ___ | Not Applicable   |
| ___ | Refuse to Answer |

***If B497 is greater than 1 and B497H is equal to 1 then READ: "You can only choose the response "Not Applicable" by itself. Please check responses." and skip to B497.***

**If B497G is not equal to 1, then skip to instruction before B499.**

B498. Specify what other way you used Ecstasy in the last 6 months in Mexico.

-----

**If B497A is not equal to 1, then skip to instruction before B500.**

B499. During the last 6 months when you used ecstasy in Mexico, on average how often did you inject it?  
(Choose one)

- 00 Never
- 01 One time per month or less
- 02 2 to 3 days per month
- 03 One time per week
- 04 2 to 3 days per week
- 05 4 to 6 days per week
- 06 One time per day
- 07 2-3 times per day
- 08 4 times or more per day
- 98 Refuse to Answer

**If B497H is equal to 1 or B497 is equal to 98, then skip to B501.**

B500. During the last 6 months when you used ecstasy in Mexico, on average how often did you use it in other ways (not inject it)? (Choose one)

- 00 Never
- 01 One time per month or less
- 02 2 to 3 days per month
- 03 One time per week
- 04 2 to 3 days per week
- 05 4 to 6 days per week
- 06 One time per day
- 07 2-3 times per day
- 08 4 times or more per day
- 98 Refuse to Answer

B501. Have you ever used Ketamine (Special K), K when you were in Mexico?

- 1 Yes
- 0 No
- 8 Refuse to Answer

***If B501 is not equal to 1, then skip to B507.***

B502. When was the last time you used Ketamine (Special K), K in Mexico?

- \_\_\_ \_\_ \_\_ YEARS
- \_\_\_ \_\_ \_\_ MONTHS
- \_\_\_ \_\_ \_\_ DAYS
- 998 Refuse to Answer (Months)
- 999 Not Applicable (Months)

***If B502 is less than LSTMX then READ: "The response is smaller than the last time participant went to Mexico. Please check the response." and skip to B502.***

***If B502 is equal to 998 or B502 is equal to 999 or B502 is greater than 6, then skip to B507.***

B503. During the last 6 months when you used Ketamine (Special K), K in Mexico, how did you use it?  
**Interviewer: If the participant indicates that they did not use ketamine in Mexico in the past 6 months, then check Not Applicable** (Check all that apply)

- Injecting
- Smoking/chasing
- Snorting
- Inhaling
- Swallowing
- Rectally/bumping
- Other
- Not Applicable
- Refuse to Answer

*If B503 is greater than 1 and B503H is equal to 1 then READ: "You can only choose the response "Not Applicable" by itself. Please check responses." and skip to B503.*

*If B503G is not equal to 1, then skip to instruction before B505.*

B504. Specify what other way you used Ketamine in the last 6 months in Mexico.

-----

*If B503A is not equal to 1, then skip to instruction before B506.*

B505. During the last 6 months when you used Ketamine (Special K, K) in Mexico, on average how often did you inject it? (Choose one)

- 00 Never
- 01 One time per month or less
- 02 2 to 3 days per month
- 03 One time per week
- 04 2 to 3 days per week
- 05 4 to 6 days per week
- 06 One time per day
- 07 2-3 times per day
- 08 4 times or more per day
- 98 Refuse to Answer

***If B503H is equal to 1 or B503 is equal to 98, then skip to B507.***

B506. During the last 6 months when you used Ketamine (Special K), K in Mexico, on average how often did you use it in other ways (not inject it)? (Choose one)

- 00 Never
- 01 One time per month or less
- 02 2 to 3 days per month
- 03 One time per week
- 04 2 to 3 days per week
- 05 4 to 6 days per week
- 06 One time per day
- 07 2-3 times per day
- 08 4 times or more per day
- 98 Refuse to Answer



- B507. Have you ever used Oxycontin when you were in Mexico?
- |  |   |                  |
|--|---|------------------|
|  | 1 | Yes              |
|  | 0 | No               |
|  | 8 | Refuse to Answer |

***If B507 is not equal to 1, then skip to B513.***

- B508. When was the last time you used Oxycontin in Mexico?
- |        |  |                           |
|--------|--|---------------------------|
| ___ __ |  | YEARS                     |
| ___ __ |  | MONTHS                    |
| ___ __ |  | DAYS                      |
| 998    |  | Refuse to Answer (Months) |
| 999    |  | Not Applicable (Months)   |

***If B508 is less than LSTMX then READ: "The response is smaller than the last time participant went to Mexico. Please check the response." and skip to B508.***

***If B508 is equal to 998 or B508 is equal to 999 or B508 is greater than 6, then skip to B513.***

- B509. During the last 6 months when you used Oxycontin in Mexico, how did you use it?  
**Interviewer: If the participant indicates that they did not use oxycontin in Mexico in the past 6 months, then check Not Applicable (Check all that apply)**

- |     |                  |
|-----|------------------|
| ___ | Injecting        |
| ___ | Smoking/chasing  |
| ___ | Snorting         |
| ___ | Inhaling         |
| ___ | Swallowing       |
| ___ | Rectally/bumping |
| ___ | Other            |
| ___ | Not Applicable   |
| ___ | Refuse to Answer |

***If B509 is greater than 1 and B509H is equal to 1 then READ: "You can only choose the response "Not Applicable" by itself. Please check responses." and skip to B509.***

***If B509G is not equal to 1, then skip to instruction before B511.***

B510. Specify what other way you used Oxycontin in the last 6 months in Mexico.

-----

***If B509A is not equal to 1, then skip to instruction before B512.***

B511. During the last 6 months when you used Oxycontin in Mexico, on average how often did you inject it?  
(Choose one)

- 00 Never
- 01 One time per month or less
- 02 2 to 3 days per month
- 03 One time per week
- 04 2 to 3 days per week
- 05 4 to 6 days per week
- 06 One time per day
- 07 2-3 times per day
- 08 4 times or more per day
- 98 Refuse to Answer

***If B509H is equal to 1 or B509 is equal to 98, then skip to B513.***

B512. During the last 6 months when you used Oxycontin in Mexico, on average how often did you use it in other ways (not inject it)? (Choose one)

- 00 Never
- 01 One time per month or less
- 02 2 to 3 days per month
- 03 One time per week
- 04 2 to 3 days per week
- 05 4 to 6 days per week
- 06 One time per day
- 07 2-3 times per day
- 08 4 times or more per day
- 98 Refuse to Answer

B513. Have you ever used other prescription opioids (Vicodin, Darvon, Percocet) when you were in Mexico?

- 1 Yes
- 0 No
- 8 Refuse to Answer

***If B513 is not equal to 1, then skip to B519.***

B514. When was the last time you used opioids (Vicodin, Darvon, Percocet) in Mexico?

- \_\_\_ \_\_ \_\_ YEARS
- \_\_\_ \_\_ \_\_ MONTHS
- \_\_\_ \_\_ \_\_ DAYS
- 998 Refuse to Answer (Months)
- 999 Not Applicable (Months)

***If B514 is less than LSTMX then READ: "The response is smaller than the last time participant went to Mexico. Please check the response." and skip to B514.***

**If B514 is equal to 998 or B514 is equal to 999 or B514 is greater than 6, then skip to B519.**

B515. During the last 6 months when you used opioids (Vicodin, Darvon, Percocet) in Mexico, how did you use it?

**Interviewer: If the participant indicates that they did not use opioids in Mexico in the past 6 months, then check Not Applicable (Check all that apply)**

- Injecting
- Smoking/chasing
- Snorting
- Inhaling
- Swallowing
- Rectally/bumping
- Other
- Not Applicable
- Refuse to Answer

**If B515 is greater than 1 and B515H is equal to 1 then READ: "You can only choose the response "Not Applicable" by itself. Please check responses." and skip to B515.**

**If B515G is not equal to 1, then skip to instruction before B517.**

B516. Specify what other way you used other prescription opioids (Vicodin, Darvon, Percocet) in the last 6 months.

-----

**If B515A is not equal to 1, then skip to instruction before B518.**

B517. During the last 6 months when you used opioids (Vicodin, Darvon, Percocet) in Mexico, on average how often did you inject it? (Choose one)

- 00 Never
- 01 One time per month or less
- 02 2 to 3 days per month
- 03 One time per week
- 04 2 to 3 days per week
- 05 4 to 6 days per week
- 06 One time per day
- 07 2-3 times per day
- 08 4 times or more per day
- 98 Refuse to Answer

***If B515H is equal to 1 or B515 is equal to 98, then skip to B519.***

B518. During the last 6 months when you used opioids (Vicodin, Darvon, Percocet) in Mexico, on average how often did you use it in other ways (not inject it)? (Choose one)

- 00 Never
- 01 One time per month or less
- 02 2 to 3 days per month
- 03 One time per week
- 04 2 to 3 days per week
- 05 4 to 6 days per week
- 06 One time per day
- 07 2-3 times per day
- 08 4 times or more per day
- 98 Refuse to Answer

B519. Have you ever used other prescription Hallucinogenic drugs like acid, LSD, peyote, mescaline, mushrooms when you were in Mexico?

- 1 Yes
- 0 No
- 8 Refuse to Answer

***If B519 is not equal to 1, then skip to B522.***

B520. When was the last time you used Hallucinogenic drugs like acid, LSD, peyote, mescaline, mushrooms in Mexico?

- \_\_\_ \_\_\_ YEARS
- \_\_\_ \_\_\_ MONTHS
- \_\_\_ \_\_\_ DAYS
- 998 Refuse to Answer (Months)
- 999 Not Applicable (Months)

***If B520 is less than LSTMX then READ: "The response is smaller than the last time participant went to Mexico. Please check the response." and skip to B520.***

***If B520 is equal to 998 or B520 is equal to 999 or B520 is greater than 6, then skip to B522.***

B521. During the last 6 months, on average how often have you used Hallucinogenic drugs like acid, LSD, peyote, mescaline, mushrooms when you were in Mexico? (Choose one)

- 00 Never
- 01 One time per month or less
- 02 2 to 3 days per month
- 03 One time per week
- 04 2 to 3 days per week
- 05 4 to 6 days per week
- 06 One time per day
- 07 2-3 times per day
- 08 4 times or more per day
- 98 Refuse to Answer

B522. Have you ever used other prescription inhalants (glue, gasoline) when you were in Mexico?

- 1 Yes
- 0 No
- 8 Refuse to Answer

***If B522 is not equal to 1, then skip to B525.***

B523. When was the last time you used inhalants (glue, gasoline) in Mexico?

- \_\_\_ YEARS
- \_\_\_ MONTHS
- \_\_\_ DAYS
- 998 Refuse to Answer (Months)
- 999 Not Applicable (Months)

***If B523 is less than LSTMX then READ: "The response is smaller than the last time participant went to Mexico. Please check the response." and skip to B523.***

**If B523 is equal to 998 or B523 is equal to 999 or B523 is greater than 6, then skip to B525.**

B524. During the last 6 months, on average how often have you used Inhalants (glue or gasoline) in Mexico?  
(Choose one)

- 00 Never
- 01 One time per month or less
- 02 2 to 3 days per month
- 03 One time per week
- 04 2 to 3 days per week
- 05 4 to 6 days per week
- 06 One time per day
- 07 2-3 times per day
- 08 4 times or more per day
- 98 Refuse to Answer

B525. Have you ever used tranquilizers (Diazepam, Valium, Ativan, Restoril or Rivotril) when you were in Mexico?

- 1 Yes
- 0 No
- 8 Refuse to Answer

**If B525 is not equal to 1, then skip to B531.**

B526. When was the last time you used tranquilizers (Diazepam, Valium, Ativan, Restoril or Rivotril) in Mexico?

- \_\_\_ \_\_\_ YEARS
- \_\_\_ \_\_\_ MONTHS
- \_\_\_ \_\_\_ DAYS
- 998 Refuse to Answer (Months)
- 999 Not Applicable (Months)



**If B526 is less than LSTMX then READ: "The response is smaller than the last time participant went to Mexico. Please check the response." and skip to B526.**

**If B526 is equal to 998 or B526 is equal to 999 or B526 is greater than 6, then skip to B531.**

B527. If you used tranquilizers (Diazepam, Valium, Ativan, Restoril or Rivotril) in the last 6 months, how did you use it?

**Interviewer: If the participant indicates that they did not use tranquilizers in Mexico in the past 6 months, then check Not Applicable (Check all that apply)**

- Injecting
- Smoking/chasing
- Snorting
- Inhaling
- Swallowing
- Rectally/bumping
- Other
- Not Applicable
- Refuse to Answer

**If B527 is greater than 1 and B527H is equal to 1 then READ: "You can only choose the response "Not Applicable" by itself. Please check responses." and skip to B527.**

**If B527G is not equal to 1, then skip to instruction before B529.**

B528. Specify what other way you used tranquilizers (Diazepam, Valium, Ativan, Restoril or Rivotril) in the last 6 months.

-----

**If B527A is not equal to 1, then skip to instruction before B530.**

B529. During the last 6 months, on average how often have you injected tranquilizers (Diazepam, Valium, Ativan, Restoril or Rivotril) in Mexico? (Choose one)

- 00 Never
- 01 One time per month or less
- 02 2 to 3 days per month
- 03 One time per week
- 04 2 to 3 days per week
- 05 4 to 6 days per week
- 06 One time per day
- 07 2-3 times per day
- 08 4 times or more per day
- 98 Refuse to Answer

***If B527H is equal to 1 or B527 is equal to 98, then skip to B531.***

B530. During the last 6 months, on average how often have you used tranquilizers (Diazepam, Valium, Ativan, Restoril or Rivotril) in Mexico in other ways (not injecting them)? (Choose one)

- 00 Never
- 01 One time per month or less
- 02 2 to 3 days per month
- 03 One time per week
- 04 2 to 3 days per week
- 05 4 to 6 days per week
- 06 One time per day
- 07 2-3 times per day
- 08 4 times or more per day
- 98 Refuse to Answer

B531. Have you ever used barbiturates (Amytal, Nembutal, and Seconal) when you were in Mexico?

- 1 Yes
- 0 No
- 8 Refuse to Answer

***If B531 is not equal to 1, then skip to B537.***

B532. When was the last time you used barbiturates (Amytal, Nembutal, and Seconal) in Mexico?

- \_\_\_ \_\_\_ YEARS
- \_\_\_ \_\_\_ MONTHS
- \_\_\_ \_\_\_ DAYS
- 998 Refuse to Answer (Months)
- 999 Not Applicable (Months)

***If B532 is less than LSTMX then READ: "The response is smaller than the last time participant went to Mexico. Please check the response." and skip to B532.***

***If B532 is equal to 998 or B532 is equal to 999 or B532 is greater than 6, then skip to B537.***

B533. If you used barbiturates (Amytal, Nembutal, and Seconal) in the last 6 months in Mexico, how did you use it?

**Interviewer: If the participant indicates that they did not use barbiturates in Mexico in the past 6 months, then check Not Applicable (Check all that apply)**

- Injecting
- Smoking/chasing
- Snorting
- Inhaling
- Swallowing
- Rectally/bumping
- Other
- Not Applicable
- Refuse to Answer

***If B533 is greater than 1 and B533H is equal to 1 then READ: "You can only choose the response "Not Applicable" by itself. Please check responses." and skip to B533.***

***If B533G is not equal to 1, then skip to instruction before B535.***

B534. Specify what other way you used barbiturates (Amytal, Nembutal, and Seconal) in the last 6 months in Mexico.

-----

***If B533A is not equal to 1, then skip to instruction before B536.***

B535. During the last 6 months, on average how often have you injected barbiturates (Amytal, Nembutal, and Seconal) in Mexico? (Choose one)

- 00 Never
- 01 One time per month or less
- 02 2 to 3 days per month
- 03 One time per week
- 04 2 to 3 days per week
- 05 4 to 6 days per week
- 06 One time per day
- 07 2-3 times per day
- 08 4 times or more per day
- 98 Refuse to Answer

***If B533H is equal to 1 or B533 is equal to 98, then skip to B537.***

B536. During the last 6 months, on average how often have you used barbiturates (Amytal, Nembutal, and Seconal) in Mexico in other ways (not injecting)? (Choose one)

- 00 Never
- 01 One time per month or less
- 02 2 to 3 days per month
- 03 One time per week
- 04 2 to 3 days per week
- 05 4 to 6 days per week
- 06 One time per day
- 07 2-3 times per day
- 08 4 times or more per day
- 98 Refuse to Answer

B537. Have you ever used brain pills (like modafinil, nootropic, ritalin) in Mexico?

- 1 Yes
- 0 No
- 8 Refuse to Answer

*If B537 is not equal to 1, then skip to B543.*

B538. When was the last time you used brain pills (like Modafinil, Nootropic, Ritalin) in Mexico?

- \_\_\_ \_\_\_ YEARS
- \_\_\_ \_\_\_ MONTHS
- \_\_\_ \_\_\_ DAYS
- 998 Refuse to Answer (Months)
- 999 Not Applicable (Months)

*If B538 is less than LSTMX then READ: "The response is smaller than the last time participant went to Mexico. Please check the response." and skip to B538.*

*If B538 is equal to 998 or B538 is equal to 999 or B538 is greater than 6, then skip to B543.*

B539. If you used brain pills (Nootropic, modafinil, ritalin) in the last 6 months in Mexico, how did you use it?

**Interviewer: If the participant indicates that they did not use brain pills in Mexico in the past 6 months, then check Not Applicable (Check all that apply)**

- \_\_\_ Injecting
- \_\_\_ Smoking/chasing
- \_\_\_ Snorting
- \_\_\_ Inhaling
- \_\_\_ Swallowing
- \_\_\_ Rectally/bumping
- \_\_\_ Other
- \_\_\_ Not Applicable
- \_\_\_ Refuse to Answer

**If B539 is greater than 1 and B539H is equal to 1 then READ: "You can only choose the response "Not Applicable" by itself. Please check responses." and skip to B539.**

**If B539G is not equal to 1, then skip to instruction before B541.**

B540. Specify what other way you used brain pills (Nootropic, modafinil, ritalin) in the last 6 months in Mexico.

-----

**If B539A is not equal to 1, then skip to instruction before B542.**

B541. During the last 6 months, on average how often have you injected brain pills (Nootropic, modafinil, ritalin) in Mexico? (Choose one)

- 00 Never
- 01 One time per month or less
- 02 2 to 3 days per month
- 03 One time per week
- 04 2 to 3 days per week
- 05 4 to 6 days per week
- 06 One time per day
- 07 2-3 times per day
- 08 4 times or more per day
- 98 Refuse to Answer

**If B539H is equal to 1 or B539 is equal to 98, then skip to B543.**

B542. During the last 6 months, on average how often have you used brain pills (Nootropic, modafinil, ritalin) in Mexico in other ways (not injecting)? (Choose one)

- 00 Never
- 01 One time per month or less
- 02 2 to 3 days per month
- 03 One time per week
- 04 2 to 3 days per week
- 05 4 to 6 days per week
- 06 One time per day
- 07 2-3 times per day
- 08 4 times or more per day
- 98 Refuse to Answer

B543. Have you ever used another drug by itself (Not Mentioned Earlier) when you were in Mexico?  
**Interviewer: Please prompt for "bath salts".**

- 1 Yes
- 0 No
- 8 Refuse to Answer

*If B543 is not equal to 1, then skip to B557.*

B544. Please specify the 1st other drug that you used by itself when you were in Mexico?

-----



B545. When was the last time you used [Response to B544] by itself in Mexico?

- — — YEARS
- — — MONTHS
- — — DAYS
- 998 Refuse to Answer (Months)
- 999 Not Applicable (Months)

*If B545 is less than LSTMX then READ: "The response is smaller than the last time participant went to Mexico. Please check the response." and skip to B545.*

*If B545 is equal to 998 or B545 is equal to 999 or B545 is greater than 6, then skip to B550.*

B546. If you used [Response to B544] in the last 6 months in Mexico, how did you use it?  
**Interviewer: If the participant indicates that they did not use [Response to B544] in Mexico in the past 6 months, then check Not Applicable (Check all that apply)**

- Injecting
- Smoking/chasing
- Snorting
- Inhaling
- Swallowing
- Rectally/bumping
- Other
- Not Applicable
- Refuse to Answer

*If B546 is greater than 1 and B546H is equal to 1 then READ: "You can only choose the response "Not Applicable" by itself. Please check responses." and skip to B546.*

*If B546G is not equal to 1, then skip to instruction before B548.*

B547. Specify what other way you used [Response to B544] in the last 6 months in Mexico.

-----

***If B546A is not equal to 1, then skip to instruction before B549.***

B548. During the last 6 months, on average how often have you injected [Response to B544] in Mexico?  
(Choose one)

- 00 Never
- 01 One time per month or less
- 02 2 to 3 days per month
- 03 One time per week
- 04 2 to 3 days per week
- 05 4 to 6 days per week
- 06 One time per day
- 07 2-3 times per day
- 08 4 times or more per day
- 98 Refuse to Answer

***If B546H is equal to 1 or B546 is equal to 98, then skip to B550.***

B549. During the last 6 months, on average how often have you used [Response to B544] in Mexico in other ways (not injecting)? (Choose one)

- 00 Never
- 01 One time per month or less
- 02 2 to 3 days per month
- 03 One time per week
- 04 2 to 3 days per week
- 05 4 to 6 days per week
- 06 One time per day
- 07 2-3 times per day
- 08 4 times or more per day
- 98 Refuse to Answer

B550. Have you ever used another drug by itself (Not Mentioned Earlier) when you were in Mexico?

- 1 Yes
- 0 No
- 8 Refuse to Answer

***If B550 is not equal to 1, then skip to B557.***

B551. Please specify the 2nd other drug that you used by itself when you were in Mexico?

-----

B552. When was the last time you used [Response to B551] by itself in Mexico?

- \_\_\_ \_\_\_ \_\_\_ YEARS
- \_\_\_ \_\_\_ \_\_\_ MONTHS
- \_\_\_ \_\_\_ \_\_\_ DAYS
- 998 Refuse to Answer (Months)
- 999 Not Applicable (Months)

*If B552 is less than LSTMX then READ: "The response is smaller than the last time participant went to Mexico. Please check the response." and skip to B552.*

*If B552 is equal to 998 or B552 is equal to 999 or B552 is greater than 6, then skip to B557.*

B553. If you used [Response to B551] in the last 6 months in Mexico, how did you use it?

**Interviewer: If the participant indicates that they did not use [Response to B551] in Mexico in the past 6 months, then check Not Applicable (Check all that apply)**

- \_\_\_ Injecting
- \_\_\_ Smoking/chasing
- \_\_\_ Snorting
- \_\_\_ Inhaling
- \_\_\_ Swallowing
- \_\_\_ Rectally/bumping
- \_\_\_ Other
- \_\_\_ Not Applicable
- \_\_\_ Refuse to Answer

*If B553 is greater than 1 and B553H is equal to 1 then READ: "You can only choose the response "Not Applicable" by itself. Please check responses." and skip to B553.*

*If B553G is not equal to 1, then skip to instruction before B555.*

B554. Specify what other way you used [Response to B551] in the last 6 months in Mexico.

-----

***If B553A is not equal to 1, then skip to instruction before B556.***

B555. During the last 6 months, on average how often have you injected [Response to B551] in Mexico?  
(Choose one)

- 00 Never
- 01 One time per month or less
- 02 2 to 3 days per month
- 03 One time per week
- 04 2 to 3 days per week
- 05 4 to 6 days per week
- 06 One time per day
- 07 2-3 times per day
- 08 4 times or more per day
- 98 Refuse to Answer

***If B553H is equal to 1 or B553 is equal to 98, then skip to B557.***

B556. During the last 6 months, on average how often have you used [Response to B551] in Mexico in other ways (not injecting)? (Choose one)

- 00 Never
- 01 One time per month or less
- 02 2 to 3 days per month
- 03 One time per week
- 04 2 to 3 days per week
- 05 4 to 6 days per week
- 06 One time per day
- 07 2-3 times per day
- 08 4 times or more per day
- 98 Refuse to Answer

B557. Have you ever used another drug combination (Not Mentioned Earlier) when you were in Mexico?

- 1 Yes
- 0 No
- 8 Refuse to Answer

***If B557 is not equal to 1, then skip to instruction before B571.***

B558. Please specify the 1st other drug combination that you used when you were in Mexico?

-----

B559. When was the last time you used [Response to B558] in Mexico?

- \_\_\_ \_\_\_ \_\_\_ YEARS
- \_\_\_ \_\_\_ \_\_\_ MONTHS
- \_\_\_ \_\_\_ \_\_\_ DAYS
- 998 Refuse to Answer (Months)
- 999 Not Applicable (Months)

*If B559 is less than LSTMX then READ: "The response is smaller than the last time participant went to Mexico. Please check the response." and skip to B559.*

*If B559 is equal to 998 or B559 is equal to 999 or B559 is greater than 6, then skip to B564.*

B560. If you used [Response to B558] in the last 6 months in Mexico, how did you use it?

**Interviewer: If the participant indicates that they did not use [Response to B558] in Mexico in the past 6 months, then check Not Applicable (Check all that apply)**

- \_\_\_ Injecting
- \_\_\_ Smoking/chasing
- \_\_\_ Snorting
- \_\_\_ Inhaling
- \_\_\_ Swallowing
- \_\_\_ Rectally/bumping
- \_\_\_ Other
- \_\_\_ Not Applicable
- \_\_\_ Refuse to Answer

*If B560 is greater than 1 and B560H is equal to 1 then READ: "You can only choose the response "Not Applicable" by itself. Please check responses." and skip to B560.*

*If B560G is not equal to 1, then skip to instruction before B562.*

B561. Specify what other way you used [Response to B558] in the last 6 months in Mexico.

-----

***If B560A is not equal to 1, then skip to instruction before B563.***

B562. During the last 6 months, on average how often have you injected [Response to B558] in Mexico?  
(Choose one)

- 00 Never
- 01 One time per month or less
- 02 2 to 3 days per month
- 03 One time per week
- 04 2 to 3 days per week
- 05 4 to 6 days per week
- 06 One time per day
- 07 2-3 times per day
- 08 4 times or more per day
- 98 Refuse to Answer

***If B560H is equal to 1 or B560 is equal to 98, then skip to B564.***



B563. During the last 6 months, on average how often have you used [Response to B558] in Mexico in other ways (not injecting)? (Choose one)

- 00 Never
- 01 One time per month or less
- 02 2 to 3 days per month
- 03 One time per week
- 04 2 to 3 days per week
- 05 4 to 6 days per week
- 06 One time per day
- 07 2-3 times per day
- 08 4 times or more per day
- 98 Refuse to Answer

B564. Have you ever used another drug combination (Not Mentioned Earlier) when you were in Mexico?

- 1 Yes
- 0 No
- 8 Refuse to Answer

***If B564 is not equal to 1, then skip to instruction before B571.***

B565. Please specify the 2nd other drug combination that you used when you were in Mexico?

-----

B566. When was the last time you used [Response to B565] by itself in Mexico?

- — — YEARS
- — — MONTHS
- — — DAYS
- 998 Refuse to Answer (Months)
- 999 Not Applicable (Months)

*If B566 is less than LSTMX then READ: "The response is smaller than the last time participant went to Mexico. Please check the response." and skip to B566.*

*If B566 is equal to 998 or B566 is equal to 999 or B566 is greater than 6, then skip to instruction before B571.*

B567. If you used [Response to B565] in the last 6 months in Mexico, how did you use it?

**Interviewer: If the participant indicates that they did not use [Response to B565] in Mexico in the past 6 months, then check Not Applicable (Check all that apply)**

- Injecting
- Smoking/chasing
- Snorting
- Inhaling
- Swallowing
- Rectally/bumping
- Other
- Not Applicable
- Refuse to Answer

*If B567 is greater than 1 and B567H is equal to 1 then READ: "You can only choose the response "Not Applicable" by itself. Please check responses." and skip to B567.*

*If B567G is not equal to 1, then skip to instruction before B569.*

B568. Specify what other way you used [Response to B565] in the last 6 months in Mexico.

-----

***If B567A is not equal to 1, then skip to instruction before B570.***

B569. During the last 6 months, on average how often have you injected [Response to B565] in Mexico?  
(Choose one)

- |    |                            |
|----|----------------------------|
| 00 | Never                      |
| 01 | One time per month or less |
| 02 | 2 to 3 days per month      |
| 03 | One time per week          |
| 04 | 2 to 3 days per week       |
| 05 | 4 to 6 days per week       |
| 06 | One time per day           |
| 07 | 2-3 times per day          |
| 08 | 4 times or more per day    |
| 98 | Refuse to Answer           |

***If B567H is equal to 1 or B567 is equal to 98, then skip to instruction before B571.***

B570. During the last 6 months, on average how often have you used [Response to B565] in Mexico in other ways (not injecting)? (Choose one)

- |    |                            |
|----|----------------------------|
| 00 | Never                      |
| 01 | One time per month or less |
| 02 | 2 to 3 days per month      |
| 03 | One time per week          |
| 04 | 2 to 3 days per week       |
| 05 | 4 to 6 days per week       |
| 06 | One time per day           |
| 07 | 2-3 times per day          |
| 08 | 4 times or more per day    |
| 98 | Refuse to Answer           |

***ANYINJMX = If(B440 is not equal to 0 and B440 is not equal to 98 and B440 is not equal to "skipped" or B454 is not equal to 0 and B454 is not equal to 98 and B454 is not equal to "skipped" or B457 is not equal to 0 and B457 is not equal to 98 and B457 is not equal to "skipped" or B464 is not equal to 0 and B464 is not equal to 98 and B464 is not equal to "skipped" or B467 is not equal to 0 and B467 is not equal to 98 and B467 is not equal to "skipped" or B470 is not equal to 0 and B470 is not equal to 98 and B470 is not equal to "skipped" or B481 is not equal to 0 and B481 is not equal to 98 and B481 is not equal to "skipped" or B484 is not equal to 0 and B484 is not equal to 98 and B484 is not equal to "skipped" or B490 is not equal to 0 and B490 is not equal to 98 and B490 is not equal to "skipped" or B491 is not equal to 0 and B491 is not equal to 98 and B491 is not equal to "skipped" or B499 is not equal to 0 and B499 is not equal to 98 and B499 is not equal to "skipped" or B505 is not equal to 0 and B505 is not equal to 98 and B505 is not equal to "skipped" or B511 is not equal to 0 and B511 is not equal to 98 and B511 is not equal to "skipped" or B517 is not equal to 0 and B517 is not equal to 98 and B517 is not equal to "skipped" or B529 is not equal to 0 and B529 is not equal to 98 and B529 is not equal to "skipped" or B535 is not equal to 0 and B535 is not equal to 98 and B535 is not equal to "skipped" or B541 is not equal to 0 and B541 is not equal to 98 and B541 is not equal to "skipped" or B548 is not equal to 0 and B548 is not equal to 98 and B548 is not equal to "skipped" or B555 is not equal to 0 and B555 is not equal to 98 and B555 is not equal to "skipped" or B562 is not equal to 0 and B562 is not equal to 98 and B562 is not equal to "skipped" or B569 is not equal to 0 and B569 is not equal to 98 and B569 is not equal to "skipped", 1, 0)***

***READ: INTERVIEWER READ TO THE RESPONDENT: The Next Questions have to do with the ways you may have injected drugs in Mexico. I know I asked you before but can you remind me...***

***If LSTMX is greater than 6 and LSTMX is not equal to 998, then skip to B591.***

B571. In the past 6 months when you were in Mexico, on average, how often did you inject (shoot) any drug or drug combination? (Choose one)

- 00 Never
- 01 One time per month or less
- 02 2 to 3 days per month
- 03 One time per week
- 04 2 to 3 days per week
- 05 4 to 6 days per week
- 06 One time per day
- 07 2-3 times per day
- 08 4 times or more per day
- 98 Refuse to Answer

B572. Of the times you injected in the last 6 months when you were in Mexico, how often did you give, rent, sell or lend a syringe that you already used to someone else? (Choose one)

- 1 Never
- 2 Sometimes
- 3 About half of the time
- 4 Often
- 5 Always
- 8 Refuse to Answer

B573. Of the times you injected in the last 6 months when you were in Mexico, how often did you use a syringe that you knew or suspected that it had been used before by someone else? (Choose one)

- 1 Never
- 2 Sometimes
- 3 About half of the time
- 4 Often
- 5 Always
- 8 Refuse to Answer

***If B573 is equal to 1 or B573 is equal to 8, then skip to B576.***

B574. The last time you injected drugs when you were in Mexico, did you use a syringe that you knew or suspected that it had been used before by someone else?

- 1 Yes
- 0 No
- 8 Refuse to Answer

B575. Of the times you injected with a syringe that had been used by somebody else in the last 6 months when you were in Mexico, how often did you clean it with bleach before you used it? (Choose one)

- 1 Never
- 2 Sometimes
- 3 About half of the time
- 4 Often
- 5 Always
- 8 Refuse to Answer

B576. Of the times you injected with other people in the last 6 months when you were in Mexico, how often did you divide up drugs with somebody else by using a syringe? This is also called back loading, piggybacking or splitting drugs wet. (Choose one)

- 1 Never
- 2 Sometimes
- 3 About half of the time
- 4 Often
- 5 Always
- 8 Refuse to Answer

B577. Of the times you injected in the last 6 months when you were in Mexico, how often did you use a cooker, cotton, or water with someone or after someone else used it? (Choose one)

- 1 Never
- 2 Sometimes
- 3 About half of the time
- 4 Often
- 5 Always
- 8 Refuse to Answer

B578. Of the times you injected in the last 6 months when you were in Mexico, how often did you buy drugs that came already prepared in a syringe? (Choose one)

- 1 Never
- 2 Sometimes
- 3 About half of the time
- 4 Often
- 5 Always
- 8 Refuse to Answer

B579. Of the times you injected in the last 6 months when you were in Mexico, how often did you inject with a new, sterile syringe? (Choose one)

- 1 Never
- 2 Sometimes
- 3 About half of the time
- 4 Often
- 5 Always
- 8 Refuse to Answer

B580. In the last 6 months when you were in Mexico, from where did you get the syringes you used to inject drugs? (Check all that apply)

- Pharmacy
- Spouse, family member, or sex partner
- Friend
- Drug dealer
- Hit doctor
- Shooting gallery
- Syringe exchange program (you exchanged it yourself)
- Someone who gets them from a syringe exchange program
- Bought on the street
- Doctor/clinic/hospital
- Veterinary clinic/ pet store
- Market/store
- Found on the ground or in the trash
- Some other place
- Refuse to Answer



**If B580N is not equal to 1, then skip to instruction before B582.**

B581. Please specify the "other" place where you got syringes from in the past 6 months when you were in Mexico.

-----  
**If B580A + B580B + B580C + B580D + B580E + B580F + B580G + B580H + B580I + B580J + B580K + B580L + B580M + B580N is equal to 1 or B580 is equal to 98, then skip to instruction before B584.**

B582. In the last 6 months when you were in Mexico, where did you get your syringes most often from?  
(Choose one)

- 01 Pharmacy
- 02 Spouse, family member, or sex partner
- 03 Friend
- 04 Drug dealer
- 05 Hit doctor
- 06 Shooting gallery
- 07 Syringe exchange program (you exchanged it yourself)
- 08 Someone who gets them from a syringe exchange program
- 09 Bought on the street
- 10 Doctor/ clinic/ hospital
- 11 Veterinary clinic/ pet store
- 12 Market/Store
- 13 Found on the ground or in the trash
- 14 Some other place
- 98 Refuse to Answer

***If B582 is equal to 1 and B580A is not equal to 1 or B582 is equal to 2 and B580B is not equal to 1 or B582 is equal to 3 and B580C is not equal to 1 or B582 is equal to 4 and B580D is not equal to 1 or B582 is equal to 5 and B580E is not equal to 1 or B582 is equal to 6 and B580F is not equal to 1 or B582 is equal to 7 and B580G is not equal to 1 or B582 is equal to 8 and B580H is not equal to 1 or B582 is equal to 9 and B580I is not equal to 1 or B582 is equal to 10 and B580J is not equal to 1 or B582 is equal to 11 and B580K is not equal to 1 or B582 is equal to 12 and B580L is not equal to 1 or B582 is equal to 13 and B580M is not equal to 1 or B582 is equal to 14 and B580N is not equal to 1 then READ: "Participant could only choose the most often place out of places named before." and skip to B582.***

***If B582 is not equal to 14, then skip to instruction before B584.***

B583. Please specify the place where you've got your syringes most often from, in the past 6 months when you were in Mexico.

-----

***If B580G is equal to 1 or B582 is equal to 7 then skip to B584***

***If not, then skip to instruction before B586.***

B584. In the last 6 months when you were in Mexico, how many sterile, clean syringes per visit did you get from a Needle Exchange Program on average?

-----

998 Refuse to Answer

***If B584 is equal to 0 or B584 is equal to 998, then skip to instruction before B586.***

B585. What was the name of the Needle Exchange Program you got syringes from most often when you were in Mexico?

-----

***If B580A is equal to 1 or B582 is equal to 1 then skip to B586***

***If not, then skip to B588.***

B586. In the last 6 months when you were in Mexico, how many sterile, clean syringes per visit did you get from a pharmacy on average?

-----

998 Refuse to Answer

***If B586 is equal to 0 or B586 is equal to 998, then skip to B588.***

B587. What was the name of the Pharmacy you bought syringes from most often when you were in Mexico?

-----

B588. In the last 6 months when you were in Mexico, how easy or hard was it for you to get new, unused syringes when you injected drugs? (Choose one)

- 1 Never tried to get new, unused syringes
- 2 Very Easy
- 3 Easy
- 4 Hard
- 5 Very hard
- 8 Refuse to Answer

***If B588 is equal to 4 or B588 is equal to 5 then skip to B589***

***If not, then skip to B591.***

B589. What was the main reason it was hard to get new, unused syringes when you were in Mexico? (Choose one)

- 01 I didn't know where to get them
- 02 They cost too much/ No money to buy them
- 03 No place to legally buy them / store won't sell to me
- 04 No syringe exchange program nearby
- 05 I am worried about getting caught / arrested by police with syringes
- 06 Pharmacy/store closed
- 07 Other
- 97 Don't Know
- 98 Refuse to Answer

***If B589 is not equal to 7, then skip to B591.***

B590. Please specify the main reason why it was hard to get new/unused syringes when you were in Mexico.

-----

B591. Have you got any help with injecting drugs, from someone (like a hit doctor), when you were in Mexico?

- 1 Yes
- 0 No
- 8 Refuse to Answer

***If B591 is not equal to 1, then skip to B594.***

B592. When was the last time someone helped you inject drugs when you were in Mexico?

- \_\_\_ MONTHS
- \_\_\_ WEEKS
- \_\_\_ DAYS
- 998 Refuse to Answer (Months)

***If B592 is less than LSTMX then READ: "The response is smaller than the last time participant went to Mexico. Please check the response." and skip to B592.***

***If B592 is equal to 998 or B592 is equal to 999 or B592 is greater than 6, then skip to B594.***

B593. In the last 6 months when you were in Mexico how often has someone else helped you inject? (Choose one)

- 1 Always
- 2 Often
- 3 Sometimes
- 4 Rarely
- 8 Refuse to Answer

B594. Please, select the type of currency you know a drug cost in Mexico. (Choose one)

- |   |                  |
|---|------------------|
| 1 | Pesos            |
| 2 | US Dollars       |
| 8 | Refuse to Answer |

***If B594 is equal to 2 then skip to B595***

***If not, then skip to instruction before B610.***

B595. In US dollars: How much does it cost a dose of black tar/heroin by itself in Mexico?

- |       |                  |
|-------|------------------|
| — — — | dollars          |
| 997   | Don't Know       |
| 998   | Refuse to Answer |

B596. In US dollars: How much does it cost a dose of powder heroin by itself in Mexico?

- |       |                  |
|-------|------------------|
| — — — | dollars          |
| 997   | Don't Know       |
| 998   | Refuse to Answer |

B597. In US dollars: How much does it cost a dose of Crack cocaine by itself in Mexico?

- |       |                  |
|-------|------------------|
| — — — | dollars          |
| 997   | Don't Know       |
| 998   | Refuse to Answer |

B598. In US dollars: How much does it cost a dose of Cocaine (powder) by itself in Mexico?

- |       |                  |
|-------|------------------|
| — — — | dollars          |
| 997   | Don't Know       |
| 998   | Refuse to Answer |

B599. In US dollars: How much does it cost a dose of heroin and cocaine together (speedball) in Mexico?

— — — dollars  
997 Don't Know  
998 Refuse to Answer

B600. In US dollars: How much does it cost a dose of Methamphetamine/crystal in Mexico?

— — — dollars  
997 Don't Know  
998 Refuse to Answer

B601. In US dollars: How much does it cost a dose of China White in Mexico?

— — — dollars  
997 Don't Know  
998 Refuse to Answer

B602. In US dollars: How much does it cost a dose of OxyContin, without a prescription in Mexico?

— — — dollars  
997 Don't Know  
998 Refuse to Answer

B603. In US dollars: How much does it cost a dose of Other prescription opioids w/o prescription (Vicodin, Darvon, Percocet) in Mexico?

— — — dollars  
997 Don't Know  
998 Refuse to Answer

B604. In US dollars: How much does it cost a dose of Tranquilizers (Rivotril, Diazepam, Valium, Ativan or Restoril) in Mexico?

\_\_\_ \_\_ \_ dollars  
 997 Don't Know  
 998 Refuse to Answer

B605. In US dollars: How much does it cost a dose of Barbiturates without a prescription (Amytal, Nembutal, and Seconal) in Mexico?

\_\_\_ \_\_ \_ dollars  
 997 Don't Know  
 998 Refuse to Answer

B606. In US dollars: How much does it cost a dose of Fentanyl in Mexico?

\_\_\_ \_\_ \_ dollars  
 997 Don't Know  
 998 Refuse to Answer

B607. Do you know the cost in dollars of Another drug or combination that was not already mentioned in Mexico?

1 Yes  
 0 No  
 8 Refuse to Answer

***If B607 is not equal to 1, then skip to instruction before B610.***

B608. In US dollars: How much does it cost a dose of Another drug or combination that was not already mentioned in Mexico?

\_\_\_ \_\_ \_ dollars  
 997 Don't Know  
 998 Refuse to Answer

***If B608 is greater than 0 and B608 is not equal to 998 then skip to B609***

***If not, then skip to instruction before B610.***

B609. Another drug or combination you named a cost for earlier.

-----

***If B594 is equal to 1 then skip to B610***

***If not, then skip to B625.***

B610. In pesos: How much does it cost a dose of black tar/heroin by itself in Mexico?

|       |                  |
|-------|------------------|
| — — — | pesos            |
| 997   | Don't Know       |
| 998   | Refuse to Answer |

B611. In pesos: How much does it cost a dose of powder heroin by itself in Mexico?

|       |                  |
|-------|------------------|
| — — — | pesos            |
| 997   | Don't Know       |
| 998   | Refuse to Answer |

B612. In pesos: How much does it cost a dose of Crack cocaine by itself in Mexico?

|       |                  |
|-------|------------------|
| — — — | pesos            |
| 997   | Don't Know       |
| 998   | Refuse to Answer |

B613. In pesos: How much does it cost a dose of Cocaine (powder) by itself in Mexico?

|       |                  |
|-------|------------------|
| — — — | pesos            |
| 997   | Don't Know       |
| 998   | Refuse to Answer |



B614. In pesos: How much does it cost a dose of heroin and cocaine together (speedball) in Mexico?

— — — pesos  
 997 Don't Know  
 998 Refuse to Answer

B615. In pesos: How much does it cost a dose of Methamphetamine/crystal in Mexico?

— — — pesos  
 997 Don't Know  
 998 Refuse to Answer

B616. In pesos: How much does it cost a dose of China White in Mexico?

— — — pesos  
 997 Don't Know  
 998 Refuse to Answer

B617. In pesos: How much does it cost a dose of OxyContin, without a prescription in Mexico?

— — — pesos  
 997 Don't Know  
 998 Refuse to Answer

B618. In pesos: How much does it cost a dose of Other prescription opioids w/o prescription (Vicodin, Darvon, Percocet) in Mexico?

— — — pesos  
 997 Don't Know  
 998 Refuse to Answer

B619. In pesos: How much does it cost a dose of Tranquilizers (Rivotril, Diazepam, Valium, Ativan or Restoril) in Mexico?

\_\_\_ \_\_ pesos  
 997 Don't Know  
 998 Refuse to Answer

B620. In pesos: How much does it cost a dose of Barbiturates without a prescription (Amytal, Nembutal, and Seconal) in Mexico?

\_\_\_ \_\_ pesos  
 997 Don't Know  
 998 Refuse to Answer

B621. In pesos: How much does it cost a dose of Fentanyl in Mexico?

\_\_\_ \_\_ pesos  
 997 Don't Know  
 998 Refuse to Answer

B622. Do you know the cost in pesos of Another drug or combination that was not already mentioned in Mexico?

1 Yes  
 0 No  
 8 Refuse to Answer

***If B622 is not equal to 1, then skip to B625.***

B623. In pesos: How much does it cost a dose of Another drug or combination that was not already mentioned in Mexico?

\_\_\_ \_\_ pesos  
 997 Don't Know  
 998 Refuse to Answer

***If B623 is greater than 0 and B623 is not equal to 998 then skip to B624***

***If not, then skip to B625.***

B624. Another drug or combination you named a cost for earlier.

-----



B629. Who have you ever helped inject for the first time? (Check all that apply)

- Sibling
- Casual sex partner
- Paid sex partner (I paid them)
- Boyfriend, Girlfriend, or Partner
- Son or daughter
- Someone to whom I sold drugs to
- Someone to whom I sold syringes to
- Friend
- Acquaintance
- Stranger
- Inmate
- Other
- Refuse to Answer

***If B629L is not equal to 1, then skip to B631.***

B630. Please specify other relationship.

-----

B631. In the last 6 months, have you helped anybody inject who had never injected before?

- 1 Yes
- 0 No
- 8 Refuse to Answer

***If B631 is not equal to 1, then skip to instruction before B641.***

B632. How many different people?

- \_\_\_\_\_ people
- 9998 Refuse to Answer



B638. In the last six months, who have you helped inject for the first time? (Check all that apply)

- Sibling
- Casual sex partner
- Paid sex partner (I paid them)
- Boyfriend, Girlfriend, or Partner
- Son or daughter
- Someone to whom I sold drugs to
- Someone to whom I sold syringes to
- Friend
- Acquaintance
- Stranger
- Inmate
- Other
- Refuse to Answer

***If B638L is not equal to 1, then skip to B640.***

B639. Please specify other relationship.

-----

B640. In the last six months, did you share syringes with someone you helped inject who had never injected before?

- 1 Yes
- 0 No
- 8 Refuse to Answer

***READ: INTERVIEWER READ TO THE RESPONDENT: The next few questions are about how able people are to practice certain behaviors. Please answer in the way that best fits you.***

B641. I can avoid injecting with a needle someone else used, even if I am injecting with people I know well. (Choose one)

- 1 Absolutely sure I CANNOT
- 2 Pretty sure I CANNOT
- 3 Pretty sure I CAN
- 4 Absolutely sure I CAN
- 8 Refuse to Answer

B642. I can avoid injecting with a needle someone else used even if I am dope sick or in withdrawal. (Choose one)

- 1 Absolutely sure I CANNOT
- 2 Pretty sure I CANNOT
- 3 Pretty sure I CAN
- 4 Absolutely sure I CAN
- 8 Refuse to Answer

B643. I can avoid using cookers, cotton, or rinse water that someone else used, even if I am injecting with people I know well. (Choose one)

- 1 Absolutely sure I CANNOT
- 2 Pretty sure I CANNOT
- 3 Pretty sure I CAN
- 4 Absolutely sure I CAN
- 8 Refuse to Answer



B644. I can avoid using my injecting partner's needle, even if we have shared needles before. (Choose one)

- 1 Absolutely sure I CANNOT
- 2 Pretty sure I CANNOT
- 3 Pretty sure I CAN
- 4 Absolutely sure I CAN
- 8 Refuse to Answer

B645. I can avoid using my injecting partner's cooker, cotton, or rinse water, even if we've shared them before. (Choose one)

- 1 Absolutely sure I CANNOT
- 2 Pretty sure I CANNOT
- 3 Pretty sure I CAN
- 4 Absolutely sure I CAN
- 8 Refuse to Answer

B646. I can avoid injecting with a needle someone else used, even if I have had sex without condoms with that person. (Choose one)

- 1 Absolutely sure I CANNOT
- 2 Pretty sure I CANNOT
- 3 Pretty sure I CAN
- 4 Absolutely sure I CAN
- 8 Refuse to Answer

**OVERDOSE EXPERIENCE**

**READ: INTERVIEWER READ TO THE RESPONDENT: The next few questions are about drug overdose. When I say overdose, I mean a situation where you passed out and could not wake up or your lips turned blue.**

B647. How many times in your life have you overdosed?

\_\_\_ \_\_\_ \_\_\_ times

997 Don't Know *Skip to instruction before Q1*

998 Refuse to Answer *Skip to instruction before Q1*

*If B647 is equal to 0, then skip to B677.*

*If NDT\_TJ is equal to 1, then skip to instruction before B649.*

B648. Of those times that you overdosed, How many times did it happen in the US?

\_\_\_ \_\_\_ \_\_\_ times

997 Don't Know *Skip to instruction before Q1*

998 Refuse to Answer *Skip to instruction before Q1*

999 Not Applicable *Skip to instruction before Q1*

*If B648 is greater than B647 and B648 is not equal to 997 and B648 is not equal to 998 and B648 is not equal to 999 then READ: "That response is greater than the number of overdoses in the participant's lifetime. Please check the answer." and skip to B648.*

*If NDT\_SD is equal to 1, then skip to B650.*

B649. Of those times that you overdosed, How many times did it happen in Mexico?

\_\_\_ \_\_\_ \_\_\_ times

997 Don't Know *Skip to instruction before Q1*

998 Refuse to Answer *Skip to instruction before Q1*

999 Not Applicable *Skip to instruction before Q1*

*If B649 is greater than B647 and B649 is not equal to 997 and B649 is not equal to 998 and B649 is not equal to 999 then READ: "That response is greater than the number of overdoses in the participant's lifetime. Please check the answer." and skip to B649.*

B650. In the last 6 months, how many times have you overdosed?

— — times

97 Don't Know *Skip to instruction before Q1*

98 Refuse to Answer *Skip to instruction before Q1*

*If B650 is greater than B647 and B650 is not equal to 97 and B650 is not equal to 98 then READ: "That response is greater than the number of overdoses in the participant's lifetime. Please check the answer." and skip to B650.*

*If B650 is equal to 0, then skip to instruction before B659.*

B651. What city/region were you in when your most recent overdose occurred? (Choose one)

- 1 San Diego County
- 2 Tijuana
- 3 Other city in the US
- 4 Other city in Mexico
- 5 Other country (not the US or Mexico)
- 7 Don't Know
- 8 Refuse to Answer

*If B651 is equal to 5 then skip to B652*

*If not, then skip to B653.*

B652. Please specify what other country (not the US or Mexico) did your most recent overdose occurred.

-----

B653. What drugs were you using on the day of your **last** overdose? (Check all that apply)

- Alcohol
- Marijuana
- Heroin/black tar by itself
- Powder heroin
- Crack cocaine by itself
- Cocaine(powder) by itself
- Heroin and cocaine together (speedball)
- Methamphetamine/crystal by itself
- Methamphetamine/crystal and heroin together
- China White by itself
- China White and heroin together
- China White and fentanyl together
- China White and crystal/meth together
- PCP
- Hallucinogenic drugs like acid, LSD, peyote, mescaline, mushrooms
- Inhalants (for example, glue, gasoline, paint thinner, agua celeste (heavenly water) or other chemicals)
- Tranquilizers without a prescription (Rivotril, Diazepam, Valium, Ativan or Restoril)
- OxyContin, without a prescription
- Other prescription opioids without a prescription (Vicodin, Darvon, Percocet)
- Barbiturates without a prescription (Amytal, Nembutal, and Seconal)
- Fentanyl and cocaine together
- Fentanyl and heroin together
- Fentanyl and Methamphetamine/crystal together

- Another drug or combination that was not already mentioned
- Don't Know
- Refuse to Answer

***If B653X is equal to 1 then skip to B654***

***If not, then skip to B655.***

B654. Please specify what other drug or combination of drugs you were using on the day of your last overdose.

-----

B655. Which of the drugs that you used on the day of your last overdose did you inject? (Check all that apply)

- Heroin/black tar by itself
- Powder heroin
- Crack cocaine by itself
- Cocaine(powder) by itself
- Heroin and cocaine together (speedball)
- Methamphetamine/crystal by itself
- Methamphetamine/crystal and heroin together
- China White by itself
- China White and heroin together
- China White and fentanyl together
- China White and crystal/meth together
- PCP
- Hallucinogenic drugs like acid, LSD, peyote, mescaline, mushrooms
- Inhalants (for example, glue, gasoline, paint thinner, agua celeste or other chemicals)
- Tranquilizers without a prescription (Rivotril, Diazepam, Valium, Ativan or Restoril)
- OxyContin, without a prescription
- Other prescription opioids without a prescription (Vicodin, Darvon, Percocet)
- Barbiturates without a prescription (Amytal, Nembutal, and Seconal)
- Fentanyl and cocaine together
- Fentanyl and heroin together
- Fentanyl and Methamphetamine/crystal together
- Fentanyl and China White
- Another drug or combination that was not already mentioned

- \_\_\_ Don't Know
- \_\_\_ Refuse to Answer

**If B655W is equal to 1 then skip to B656**

**If not, then skip to B657.**

B656. Please specify the other drug/drugs combination that you injected on the day of your last overdose.

-----

B657. In the last 30 days prior to the overdose you just described, had you been in custody (prison, jail, detention center) for 3 or more days?

- 1 Yes
- 0 No
- 8 Refuse to Answer

B658. In the last 30 days prior to the overdose you just described, had you stopped using drugs for 3 or more days because you were in drug treatment or for some other reason?

- 1 Yes
- 0 No
- 8 Refuse to Answer

**READ: INTERVIEWER READ TO THE RESPONDENT: Naloxone is a medicine that can be used to reverse an overdose.**

B659. Have you ever heard of naloxone before today? (Choose one)

- 1 Yes
- 2 No
- 3 Unsure
- 8 Refuse to Answer

**If B659 is not equal to 1, then skip to B676.**

- B660. Have you ever had to use Naloxone on yourself? (Choose one)
- |   |                  |
|---|------------------|
| 1 | Yes              |
| 2 | No               |
| 3 | Unsure           |
| 8 | Refuse to Answer |

***If B660 is not equal to 1, then skip to B662.***

- B661. How many times did you have to use Naloxone on yourself in the last 6 months?
- — — —
- |     |                  |
|-----|------------------|
| 998 | Refuse to Answer |
|-----|------------------|

- B662. Has anyone else ever had to use Naloxone on you? (Choose one)
- |   |                  |
|---|------------------|
| 1 | Yes              |
| 2 | No               |
| 3 | Unsure           |
| 8 | Refuse to Answer |

***If B662 is not equal to 1, then skip to B664.***

- B663. How many times has anyone else had to use Naloxone on you in the last 6 months?
- — — —
- |     |                  |
|-----|------------------|
| 998 | Refuse to Answer |
|-----|------------------|

- B664. Have you ever had to use Naloxone on someone else? (Choose one)
- |   |                  |
|---|------------------|
| 1 | Yes              |
| 2 | No               |
| 3 | Unsure           |
| 8 | Refuse to Answer |

***If B664 is not equal to 1, then skip to B666.***

- B665. How many times did you have to use Naloxone on someone else in the last 6 months?
- — — —
- |     |                  |
|-----|------------------|
| 998 | Refuse to Answer |
|-----|------------------|



- B666. Do you have naloxone on you right now?
- 1 Yes
  - 0 No
  - 8 Refuse to Answer
- B667. Where did you get the last Naloxone? (Choose one)
- 01 Needle Exchange Program
  - 02 On Point
  - 03 PrevenCasa
  - 04 Community Health Clinic
  - 05 Pharmacy
  - 06 Drug treatment program
  - 07 N/A (never got naloxone)
  - 08 Other
  - 98 Refuse to Answer

***If B667 is not equal to 8, then skip to B669.***

B668. Please specify where did you get Naloxone

\_\_\_\_\_

- B669. How did you pay for the last Naloxone you got? (Choose one)
- 1 In US Dollars
  - 2 In Pesos
  - 3 In other form of payment
  - 4 Did not pay (Zero)
  - 8 Refuse to Answer

***If B669 is not equal to 1, then skip to instruction before B671.***

B670. How much did you pay for the last Naloxone in US Dollars?

\_\_\_\_\_ Dollars

998 Refuse to Answer

***If B669 is not equal to 2, then skip to instruction before B672.***



B676. In the last 6 months, have you had an abscess (cuerazo) at a location on your body where you injected drugs?

- 1 Yes
- 0 No
- 8 Refuse to Answer

B677. What is the primary kind of health insurance or health care plan that you have now? (Choose one)

- 0 I do not have health insurance
- 1 Private (purchased directly or through employment)
- 2 Public (e.g., Medicare, Medicaid, Tricare)
- 7 Don't Know
- 8 Refuse to Answer

B678. Did you lose health coverage because of the COVID-19 pandemic?

- 1 Yes
- 0 No
- 7 Don't Know
- 8 Refuse to Answer

B679. Do you have a disability that interferes with your ability to carry out daily activities? Examples of daily activities include walking, climbing stairs, shopping, balancing a checkbook, bathing or dressing.

- 1 Yes
- 0 No
- 8 Refuse to Answer

**DRUG REHAB EXPERIENCE**

**READ: INTERVIEWER READ TO THE RESPONDENT: Now, I am going to ask you some questions about getting help for your drug use.**

B680. To what extent would you say that you currently need help for your drug use? (Choose one)

- 0 No need
- 1 Some need
- 2 Great need
- 3 Urgent need
- 8 Refuse to Answer

B681. Have you ever received any type of professional help for your use of alcohol or drugs? By help I mean a rehabilitation center, methadone or other medication use, or any other type of program or meeting that helps you reduce or stop your alcohol or drug use.

- 1 Yes
- 0 No
- 8 Refuse to Answer

***If B681 is not equal to 1, then skip to instruction before B770.***

B682. For which of the following, you received professional help? (Choose one)

- 1 Drugs only
- 2 Alcohol only
- 3 Both, drugs and alcohol
- 8 Don't Know
- 9 Refuse to Answer

***If B682 is equal to 1 or B682 is equal to 3 then skip to B683***

***If not, then skip to instruction before B686.***

B683. How many times in your life have you received any type of professional help for your use of drugs?

|     |                  |
|-----|------------------|
| ___ | # of Times       |
| 97  | Don't Know       |
| 98  | Refuse to Answer |

B684. Of those [Response to B683] times, how many times did you receive help in the U.S. for your use of drugs?

|     |                  |
|-----|------------------|
| ___ | # of Times       |
| 98  | Refuse to Answer |

***If B684 is greater than B683 and B684 is not equal to 98 then READ: "That response is greater than the total number of times that the participant received professional help for drug use." and skip to B684.***

B685. Of those [Response to B683] times, how many times did you receive help in Mexico for your use of drugs?

|     |                  |
|-----|------------------|
| ___ | # of Times       |
| 98  | Refuse to Answer |

***If B685 is greater than B683 and B685 is not equal to 98 then READ: "That response is greater than the total number of times that the participant received professional help for drug use." and skip to B685.***

***If B682 is equal to 2 or B682 is equal to 3 then skip to B686***

***If not, then skip to B689.***

B686. How many times in your life have you received any type of professional help for your use of alcohol?

|     |                  |
|-----|------------------|
| ___ | # of Times       |
| -1  | Don't Know       |
| 98  | Refuse to Answer |

B687. Of those [Response to B686] times, how many times did you receive help in the U.S. for your use of alcohol?

|     |                  |
|-----|------------------|
| ___ | # of Times       |
| 98  | Refuse to Answer |

**If B687 is greater than B686 and B687 is not equal to 98 then READ: "That response is greater than the total number of times that the participant received professional help for alcohol use." and skip to B687.**

B688. Of those [Response to B686] times, how many times did you receive help in Mexico for your use of alcohol?

\_\_\_ # of Times  
98 Refuse to Answer

**If B688 is greater than B686 and B688 is not equal to 98 then READ: "That response is greater than the total number of times that the participant received professional help for alcohol use." and skip to B688.**

B689. Have you ever enrolled in a rehabilitation center? By rehabilitation center, I mean a place where you went and stayed for help with your drug or alcohol problems.

1 Yes  
0 No  
8 Refuse to Answer

**If B689 is not equal to 1, then skip to B720.**

B690. How many times have you enrolled in a rehabilitation center?

\_\_\_ # of Times  
98 Refuse to Answer

**If B690 is greater than B683 + B686 and B690 is not equal to 98 then READ: "That response is greater than the total number of times that the participant received professional help for drug use." and skip to B690.**

**READ: INTERVIEWER READ TO THE RESPONDENT: Now I would like to ask you some questions about your experiences in the rehabilitation centers that you have gone to.**

B691. What was the name of the most recent rehab/drug treatment center in which you enrolled?

-----

B692. In what city was this rehab/drug treatment center is located? (Choose one)

- 1 San Diego County
- 2 Tijuana
- 3 Other city in the US
- 4 Other city in Mexico
- 5 Other
- 8 Refuse to Answer

***If B692 is equal to 5 then skip to B693***

***If not, then skip to B694.***

B693. Please specify the city where this rehab/drug treatment center located

-----

B694. When did you enter this rehab/drug treatment center the last time? (Choose one)

- 1 less than one month ago
- 2 1-6 months ago
- 3 > 6 months ago
- 8 Refuse to Answer

***If B694 is equal to 3, then skip to B720.***

- B695. What type of program was it? (Choose one)
- 1 Ayuda mutua or 12-step meetings
  - 2 Faith/ Religious based
  - 3 Government-run institution
  - 4 Private Hospital institution
  - 5 Methadone/Buprenorphine/Suboxone clinic
  - 6 Other
  - 7 Don't Know
  - 8 Refuse to Answer

***If B695 is equal to 6 then skip to B696***

***If not, then skip to B697.***

B696. Please specify the type of rehab/drug treatment program.

-----

- B697. Was there a cost to enroll in the rehab/drug treatment program?
- 1 Yes
  - 0 No
  - 8 Refuse to Answer

***If B697 is not equal to 1, then skip to B703.***

B698. Please, select the type of currency you know the rehab program costs. (Choose one)

- 1 Pesos
- 2 US Dollars
- 8 Refuse to Answer
- 9 Not Applicable

***If B698 is equal to 2 then skip to B699***

***If not, then skip to instruction before B701.***





B704. Which drugs did you go to get help for at this most recent rehab center? (Check all that apply)

- Alcohol
- Marijuana
- Heroin
- Crack cocaine
- Cocaine (powder)
- Methamphetamine/crystal
- China White
- PCP
- Hallucinogenic drugs like acid, LSD, peyote, mescaline, mushrooms
- Inhalants (for example, glue, gasoline, paint thinner, agua celeste or other chemicals)
- Tranquilizers without a prescription (Rivotril, Diazepam, Valium, Ativan or Restoril)
- OxyContin, without a prescription
- Other prescription opioids without a prescription (Vicodin, Darvon, Percocet)
- Barbiturates without a prescription (Amytal, Nembutal, and Seconal)
- Fentanyl
- Another drug or combination that was not already mentioned
- Refuse to Answer

***If B704P is equal to 1 then skip to B705***

***If not, then skip to B706.***

B705. Please specify other drug(s) or drug combination(s) that you sought help for.

-----



**If B708K is not equal to 1, then skip to instruction before B710.**

B709. Please specify the other person who made you go to this most recent rehab center:

-----

**If B707 is equal to 1 then skip to B710**

**If not, then skip to instruction before B711.**

B710. What are all the reasons that you decided to enroll in this most recent rehab center? (Check all that apply)

- I had a bad withdrawal
- I was tired of using/wanted to do more with my life
- I wanted to avoid getting arrested
- I was given a choice between treatment and incarceration, so I chose treatment
- I was forced by law enforcement officials
- My partner encouraged me to go
- My partner was getting clean too
- I was pregnant/had a child
- My kids were taken away
- Encouragement from family
- I was sick and needed medical attention
- I had mental health issues
- I overdosed
- Religious reasons
- I couldn't afford my drug use anymore
- Other
- Refuse to Answer

**If B710P is not equal to 1, then skip to B712.**



B715. What services did you have access to at this most recent rehab center?

**Interviewer: Read out the options and check all that apply**

(Check all that apply)

- Ayuda mutua or 12-step meetings
- Individual psychological counseling
- Family psychological counseling
- Spiritual counseling
- HIV testing
- STI testing
- HCV testing
- COVID-19 testing
- Medical treatment from a doctor
- Legal services
- Health education
- Clothing and other personal items
- Job training or skill development
- Other
- Refuse to Answer

***If B715N is equal to 1 then skip to B716***

***If not, then skip to B717.***

B716. Please specify what other services you had access to.

-----

B717. The last time you were in drug treatment were you mistreated by any of the staff?

- 1 Yes
- 0 No
- 8 Refuse to Answer

*If B717 is equal to 1 then skip to B718*

*If not, then skip to instruction before B719.*

B718. What kinds of mistreatment did you experience from the staff?

**Interviewer: Do not read out list. Mark all that respondent says**  
(Check all that apply)

- 
- 
- 
- 
- 
- 
- 
- 
- 
- 
- 
- 
- 
- 
- 

- Verbal abuse,
- Lack of respect
- Mental/psych
- Physical abus
- Physically res
- Prevented fro
- Physical puni
- Sexual abuse
- Refused to pr
- Had to work c
- Was robbed c
- Wasn't allowe
- Didn't have e
- Was sick, but
- Other
- Refuse to Ans

***If B718O is equal to 1 then skip to B719***

***If not, then skip to B720.***

B719. Please specify the other kind of mistreatment that you experienced.

-----



**METHADONE EXPERIENCES**

B720. Have you ever been enrolled in a methadone program?

**INTERVIEWER: If participant says Do not know, read: Methadone is an oral replacement therapy, which means the medication is given to you orally to help you deal with your addiction.**

- 1 Yes
- 0 No
- 8 Refuse to Answer

*If B720 is equal to 0 then skip to B721*

*If not, then skip to instruction before B723.*

B721. Why have you never been enrolled in a methadone program? (Choose one)

- 01 It does not work
- 02 I didn't want my family to find out I was addicted
- 03 I relapsed
- 04 It is too expensive
- 05 It is a hassle to go to the clinic everyday
- 06 The clinic was too far away
- 07 It causes bad withdrawal (malilla)
- 08 The dose is too strong
- 09 The dose is too weak
- 10 I still want to use, I do not see the point
- 11 It is more addictive
- 12 No one recommended it to me
- 13 I do not know what methadone is
- 14 Other
- 98 Refuse to Answer

***If B721 is not equal to 14, then skip to instruction before B723.***

B722. Please, specify other reason.

-----

***If B720 is not equal to 1, then skip to B745.***

B723. How many times in your life have you started a methadone program?

**INTERVIEWER: If participant says Do not know, ask them for their best guess or estimate**

\_\_\_ times

98 Refuse to Answer

**If B723 is greater than B683 and B723 is not equal to 98 then READ: "That response is greater than the total number of times that the participant received professional help for drug use." and skip to B723.**

B724. How old were you the first time?

**INTERVIEWER: If participant says Do not know, ask them for their best guess or best estimate.**

- — Years Old
- 98 Refuse to Answer

**If B724 is greater than A1 and B724 is not equal to 98 then READ: "That response exceeds the participant's current age. Please check the response." and skip to B724.**

B725. Are you currently enrolled in a methadone program?

- 1 Yes
- 0 No
- 8 Refuse to Answer

B726. When was the last time you were enrolled in a methadone program?

**INTERVIEWER: If participant says Do not know, ask them for their best guess or best estimate. (Choose one)**

- 1 Within the past 6 months
- 2 Longer than 6 months ago, but within the past year
- 3 More than 1 year ago, but less than 3 years ago
- 4 Three to five years ago
- 5 More than 5 years ago
- 8 Refuse to Answer

- B727. In what city was this methadone program? (Choose one)
- 1 San Diego County
  - 2 Tijuana
  - 3 Other city in the US
  - 4 Other city in Mexico
  - 5 Other
  - 7 Don't Know
  - 8 Refuse to Answer

***If B727 is equal to 5 then skip to B728***

***If not, then skip to B729.***

B728. Please specify the city where this methadone program located

-----

B729. Have you ever enrolled in a Methadone treatment program that was ordered by a law enforcement official or a judge?

- 1 Yes
- 0 No
- 8 Refuse to Answer

***If B729 is not equal to 1, then skip to B732.***

B730. In what city was this methadone program located? (Check all that apply)

- \_\_\_ San Diego County
- \_\_\_ Tijuana
- \_\_\_ Other city in the US
- \_\_\_ Other city in Mexico
- \_\_\_ Other
- \_\_\_ Refuse to Answer

**If B730E is equal to 1 then skip to B731**

**If not, then skip to B732.**

B731. Please specify the city where this methadone program ordered by a judge located

-----

B732. Please, select the type of currency you know the methadone program costs. (Choose one)

- 1 Pesos
- 2 US Dollars
- 8 Refuse to Answer
- 9 Not Applicable

**If B732 is equal to 2 then skip to B733**

**If not, then skip to instruction before B735.**

B733. What was the cost of the methadone program?

-----

\$

99998

Refuse to Answer

B734. Please, specify the pay period of the methadone program the cost like per day, week, or month.  
(Choose one)

- 1 per day
- 2 per week
- 3 per month
- 8 Refuse to Answer

**If B732 is equal to 1 then skip to B735**

**If not, then skip to instruction before B737.**

B735. What was the cost of the methadone program?

-----

pesos

99998

Refuse to Answer

B736. Please, specify the pay period of the methadone program the cost like per day, week, or month.  
(Choose one)

- 1 per day
- 2 per week
- 3 per month
- 8 Refuse to Answer

*If B725 is equal to 1 then skip to B737*

*If not, then skip to instruction before B738.*

B737. Are you still taking methadone?

- 1 Yes
- 0 No
- 8 Refuse to Answer

*If B737 is equal to 1 then skip to B738*

*If not, then skip to instruction before B740.*

B738. What dosage did you start on?

- \_\_\_ \_\_\_ mg
- 998 Refuse to Answer

B739. What dosage are you on now?

- \_\_\_ \_\_\_ mg
- 998 Refuse to Answer

*If B737 is equal to 0 then skip to B740*

*If not, then skip to B742.*

B740. What are all the reasons that you stopped using methadone?

**Interviewer: Do not read out list, check all that apply** (Check all that apply)

- It didn't work
- I relapsed
- It was too expensive
- It was a hassle to go to the clinic everyday
- I felt in danger using the clinic
- The clinic was too far away
- It gave me worse withdrawal (malilla) than Black tar
- The dose was too strong
- The dose was too weak
- I did not like the staff at the clinic
- I was still using other drugs so I didn't see the point in continuing
- It is more addictive than Black tar/heroin
- It was confiscated by the police
- I am afraid of being hassled by the police for taking it
- Other
- Refuse to Answer

***If B740 is equal to 1 then skip to B741***

***If not, then skip to B742.***

B741. Please specify the other reason(s) that you stopped using methadone.

-----

B742. How long were you enrolled in the methadone program for that last time?

- \_\_\_ \_\_\_ MONTHS
- \_\_\_ \_\_\_ WEEKS
- \_\_\_ \_\_\_ DAYS
- 998 Refuse to Answer (Months)

*If Trunc(B742/12) is greater than A1 then READ: "This response exceeds the participant's current age. Please check the response." and skip to B742.*

*If B723 is greater than 1 and B723 is not equal to 98 then skip to B743*

*If not, then skip to B744.*

B743. What is the longest period of time that you've ever been enrolled in a methadone program?

- \_\_\_ \_\_\_ MONTHS
- \_\_\_ \_\_\_ WEEKS
- \_\_\_ \_\_\_ DAYS
- 998 Refuse to Answer (Months)

*If Trunc(B743/12) is greater than A1 then READ: "This response exceeds the participant's current age. Please check the response." and skip to B743.*

B744. What did you think about the dosage of methadone you were given? (Choose one)

- 1 It was too high
- 2 It was too low
- 3 It was the right amount
- 7 Don't Know
- 8 Refuse to Answer



## BUPRENORPHINE EXPERIENCES

B745. Have you ever been enrolled in a Buprenorphine program?

**Interviewer, if participant says Do not know, read: Buprenorphine is an oral replacement therapy similar to methadone, which means the medication is given to you orally to help you deal with your addiction**

- |   |                  |
|---|------------------|
| 1 | Yes              |
| 0 | No               |
| 8 | Refuse to Answer |

*If B745 is equal to 0 then skip to B746*

*If not, then skip to instruction before B748.*

B746. Why have you never been enrolled in a Buprenorphine/Suboxone program? (Choose one)

- |    |                                                    |
|----|----------------------------------------------------|
| 01 | It does not work                                   |
| 02 | I didn't want my family to find out I was addicted |
| 03 | I relapsed                                         |
| 04 | It is too expensive                                |
| 05 | It is a hassle to go to the clinic everyday        |
| 06 | The clinic was too far away                        |
| 07 | It causes bad withdrawal (malilla)                 |
| 08 | The dose is too strong                             |
| 09 | The dose is too weak                               |
| 10 | I still want to use, I do not see the point        |
| 11 | It is more addictive                               |
| 12 | No one recommended it to me                        |
| 13 | I do not know what Buprenorphine/Suboxone is       |
| 14 | Other                                              |
| 98 | Refuse to Answer                                   |

**If B746 is not equal to 14, then skip to instruction before B748.**

B747. Please, specify other reason.

-----

**If B745 is not equal to 1, then skip to instruction before B770.**

B748. How many times in your life have you been on Buprenorphine/Suboxone?  
**Interviewer, if participant says Do not know, ask them for their best guess or best estimate.**

\_\_\_\_\_ Times  
-01 Refuse to Answer

**If B748 is greater than B683 and B748 is not equal to 98 then READ: "That response is greater than the total number of times that the participant received professional help for drug use." and skip to B748.**

B749. How old were you the first time you used Buprenorphine/Suboxone?  
**Interviewer, if participant says Do not know, ask them for their best guess or best estimate.**

\_\_\_\_\_ Years Old  
98 Refuse to Answer

**If B749 is greater than A1 and B749 is not equal to 98 then READ: "That response exceeds the participant's current age. Please check the response." and skip to B749.**

B750. Are you currently enrolled in a Buprenorphine/Suboxone program?      1      Yes  
0      No  
8      Refuse to Answer

B751. When was the last time you were enrolled in a Buprenorphine/Suboxone program?  
**Interviewer: If participant says Do not know, ask them for their best guess or estimate** (Choose one)

- 1 Within the past 6 months
- 2 Longer than 6 months ago, but within the past year
- 3 More than 1 year ago, but less than 3 years ago
- 4 Three to five years ago
- 5 More than 5 years ago
- 7 Don't Know
- 8 Refuse to Answer

B752. In what city was this Buprenorphine/Suboxone program located? (Choose one)

- 1 San Diego County
- 2 Tijuana
- 3 Other city in the US
- 4 Other city in Mexico
- 5 Other
- 8 Refuse to Answer

***If B752 is equal to 5 then skip to B753***

***If not, then skip to B754.***

B753. Please specify the city where this Buprenorphine/Suboxone program located

-----

B754. Have you ever enrolled in a Buprenorphine/Suboxone treatment program that was ordered by a law enforcement official or a judge?

- 1 Yes
- 0 No
- 8 Refuse to Answer

***If B754 is not equal to 1, then skip to B757.***

B755. In what city was the Buprenorphine/Suboxone treatment program that was ordered by a law enforcement official or a judge located? (Check all that apply)

- \_\_\_ San Diego County
- \_\_\_ Tijuana
- \_\_\_ Other city in the US
- \_\_\_ Other city in Mexico
- \_\_\_ Other
- \_\_\_ Refuse to Answer

***If B755E is equal to 1 then skip to B756***

***If not, then skip to B757.***

B756. Please specify the city where this Buprenorphine/Suboxone program ordered by a judge located

-----

B757. Please, select the type of currency you know the Buprenorphine/Suboxone program costs. (Choose one)

- 1 Pesos
- 2 US Dollars
- 8 Refuse to Answer
- 9 Not Applicable

***If B757 is equal to 2 then skip to B758***

***If not, then skip to instruction before B760.***

B758. What was the cost of the Buprenorphine/Suboxone program (in US dollars)?

|       |                  |
|-------|------------------|
| _____ | \$               |
| 99998 | Refuse to Answer |

B759. Please, specify the pay period of the Buprenorphine/Suboxone program the cost like per day or week or month (in US dollars). (Choose one)

- 1 per day
- 2 per week
- 3 per month
- 8 Refuse to Answer

***If B757 is equal to 1 then skip to B760***

***If not, then skip to instruction before B762.***

B760. What was the cost of the Buprenorphine/Suboxone program (in pesos)?

|       |                  |
|-------|------------------|
| _____ | pesos            |
| 99998 | Refuse to Answer |

B761. Please, specify the pay period of the Buprenorphine/Suboxone program the cost like per day or week or month (in pesos). (Choose one)

- 1 per day
- 2 per week
- 3 per month
- 8 Refuse to Answer

***If B750 is equal to 1 then skip to B762***

***If not, then skip to instruction before B763.***

B762. Are you still taking Buprenorphine?

- 1 Yes
- 0 No
- 8 Refuse to Answer

**If B762 is equal to 1 then skip to B763**

**If not, then skip to instruction before B765.**

|       |                               |             |                  |
|-------|-------------------------------|-------------|------------------|
| B763. | What dosage did you start on? | ___ ___ ___ | mg               |
|       |                               | 998         | Refuse to Answer |

|       |                             |             |                  |
|-------|-----------------------------|-------------|------------------|
| B764. | What dosage are you on now? | ___ ___ ___ | mg               |
|       |                             | 998         | Refuse to Answer |

**If B762 is equal to 0 then skip to B765**

**If not, then skip to B767.**

B765. What are all the reasons that you stopped using Buprenorphine/Suboxone?  
**Interviewer: Do not read out list, check all that apply** (Check all that apply)

- It didn't work
- I relapsed
- It was too expensive
- It was a hassle to go to the clinic everyday
- I felt in danger using the clinic
- The clinic was too far away
- It gave me worse withdrawal (malilla) than Black tar
- The dose was too strong
- The dose was too weak
- I did not like the staff at the clinic
- I was still using other drugs so I didn't see the point in continuing
- Other
- Refuse to Answer

**If B765L is equal to 1 then skip to B766**

**If not, then skip to B767.**

B766. Please specify the other reason(s) that you stopped using Buprenorphine/Suboxone.

-----

B767. How long were you enrolled in the Buprenorphine/Suboxone program for that last time?

- \_\_\_ \_\_\_ MONTHS
- \_\_\_ \_\_\_ WEEKS
- \_\_\_ \_\_\_ DAYS
- 998 Refuse to Answer (Months)

***If Trunc(B767/12) is greater than A1 then READ: "This response exceeds the participant's current age. Please check the response." and skip to B767.***

B768. What is the longest period of time that you've ever been enrolled in a Buprenorphine/Suboxone program?

**Interviewer, if participant says Do not know, ask them for their best guess or estimate**

- \_\_\_ \_\_\_ MONTHS
- \_\_\_ \_\_\_ WEEKS
- \_\_\_ \_\_\_ DAYS
- 998 Refuse to Answer (Months)

***If Trunc(B768/12) is greater than A1 then READ: "This response exceeds the participant's current age. Please check the response." and skip to B768.***

B769. What did you think about the dosage of Buprenorphine/Suboxone you were given? (Choose one)

- 1 It was too high
- 2 It was too low
- 3 It was the right amount
- 7 Don't Know
- 8 Refuse to Answer

***If B681 is not equal to 1 then skip to B770***

***If not, then skip to instruction before B772.***

B770. Please tell me all the reasons why you have never received any kind of help or treatment for your drug use. (Check all that apply)

- Fear of withdrawal
- Cost/financial
- Did not have child care
- Spouse or partner does not want participant to go or causes problems in relationship
- Did not meet admission criteria
- Dislikes center
- Dislikes treatment regimen
- Too many rules/restrictions at treatment center
- Doesn't like feeling locked up
- Job problems (like getting time off from work)
- Too far to travel/not nearby
- Didn't know where to go
- Afraid of being treated badly by the staff
- Afraid of others knowing that participant is in treatment
- Doesn't have the willpower to stop
- Drug use isn't a problem
- Tried a program before but it didn't work
- Doesn't think treatment works
- Can cut down/quit using drugs by him/herself
- Not ready to stop using drugs
- Haven't thought about going to treatment
- Happy with current lifestyle
- Afraid for safety when accessing the program



\_\_\_ Afraid of being hassled by police when accessing program

\_\_\_ Refuse to Answer

B771. Do you have other reasons why you have never received any kind of help or treatment for your drug use.

- 1 Yes
- 0 No
- 8 Refuse to Answer

***If B771 is equal to 1 then skip to B772***

***If not, then skip to instruction before B773.***

B772. Please specify other reason(s) you have not sought help or treatment for drug use.

-----

***If B725 is equal to 1, then skip to instruction before B774.***

B773. How likely are you to start a methadone program within the next 6 months?

**INTERVIEWER: If participant says Do not know, read: Methadone is an oral replacement therapy, which means the medication is given to you orally to help you deal with your addiction. (Choose one)**

- 1 Very Unlikely
- 2 Unlikely
- 3 Likely
- 4 Very Likely
- 8 Refuse to Answer

***If B750 is equal to 1, then skip to instruction before B775.***

B774. How likely are you to start a Buprenorphine/Suboxone program within the next 6 months?  
**Interviewer, if participant says Do not know, read: Buprenorphine/suboxone is an oral replacement therapy similar to methadone, which means the medication is given to you orally to help you deal with your addiction (Choose one)**

- 1 Very Unlikely
- 2 Unlikely
- 3 Likely
- 4 Very Likely
- 8 Refuse to Answer

LAW ENFORCEMENT ENCOUNTERS

READ: INTERVIEWER READ TO THE RESPONDENT: The following questions refer to the actual laws and criminal justice experiences. Please answer the following to the best of your knowledge about the laws, regardless of whether or not you think the police follow these laws.

If NDT\_SD is equal to 1 or DT\_SD is equal to 1 then skip to B775

If not, then skip to instruction before B776.

B775. In your opinion, is it currently legal to carry new, unused syringes in San Diego?

- 1 Yes
- 0 No
- 7 Don't Know
- 8 Refuse to Answer

If NDT\_TJ is equal to 1 or DT\_SD is equal to 1 then skip to B776

If not, then skip to instruction before B777.

B776. In your opinion, is it currently legal to carry new, unused syringes in Tijuana?

- 1 Yes
- 0 No
- 7 Don't Know
- 8 Refuse to Answer

READ: INTERVIEWER READ TO THE RESPONDENT: Now I would like to ask you a few questions about encounters you have had with law enforcement. When I say law enforcement, this term includes all types of municipal, state, or federal police or army officers, investigators, or prosecutors. This section is just about interactions with law enforcement in Mexico or the US. I know some of the questions we will ask may be a little uncomfortable for you to answer, but the interview is confidential, and we will not give any of your personal information to anyone outside of this project. Nothing that you tell us can be traced back to you as an individual.

B777. Have you ever been stopped by law enforcement? By this, we mean anytime you were stopped by law enforcement (e.g., you were stopped and let go or you were stopped and got arrested).

- 1 Yes
- 0 No
- 8 Refuse to Answer

***If B777 is not equal to 1, then skip to B797.***

B778. In the last 6 months, Have you been stopped by law enforcement? By this, we mean anytime you were stopped by law enforcement (e.g., you were stopped and let go or you were stopped and got arrested).

- 1 Yes
- 0 No
- 8 Refuse to Answer

***If B778 is not equal to 1, then skip to B797.***

B779. In the last 6 months, in what city were you when you were stopped by law enforcement? (Check all that apply)

- \_\_\_ San Diego County
- \_\_\_ Tijuana
- \_\_\_ Other city in the US
- \_\_\_ Other city in Mexico
- \_\_\_ Other
- \_\_\_ Refuse to Answer

***If B779E is equal to 1 then skip to B780***

***If not, then skip to B781.***

B780. Please specify the city where you were stopped by law enforcement in the last 6 months

-----

B781. In the last 6 months, when you were stopped by the law enforcement, which of the following occurred?  
(Check all that apply)

- You were stopped and arrested
- You were stopped and let go
- Don't Know
- Refuse to Answer

*If B781B is equal to 1 then skip to instruction before B782*

*If not, then skip to B790.*

**READ: INTERVIEWER READ TO THE RESPONDENT: The following questions will address the times you were stopped but NOT arrested by law enforcement in the last 6 months.**

B782. How many times were you stopped (but not arrested) by the law enforcement in the past 6 months?  
**Interviewer: If participant has difficulty calculating a response for the 6-month period, please assist by promoting for an estimate of frequency of events (times per week or month); then calculate an estimate based on frequency of encounters per month or per week (e.g. once a week multiplied by 26 weeks = 26 times, or twice per month multiplied by 6 months = 12 times)**

\_\_\_ # of Times

998 Refuse to Answer *Skip to instruction before Q1*

*If B782 is equal to 998 then skip to instruction before B783*

*If not, then skip to instruction before B784.*

**READ: INTERVIEWER, if a participant refuses to answer this question, reiterate the following statement: I know some of the questions we will ask may be a little uncomfortable for you to answer, but the interview is confidential, and we will not give any of your personal information to anyone outside of this project. Nothing that you tell us can be traced back to you as an individual.**

B783. How many times were you stopped (but not arrested) by the law enforcement in the past 6 months?  
**Interviewer: If participant has difficulty calculating a response for the 6-month period, please assist by promoting for an estimate of frequency of events (times per week or month); then calculate an estimate based on frequency of encounters per month or per week (e.g. once a week multiplied by 26 weeks = 26 times, or twice per month multiplied by 6 months = 12 times)**

\_\_\_ # of Times

998 Refuse to Answer *Skip to instruction before Q1*

**STOPPED = If(B782 is not equal to 998, B782, If(B782 is equal to 998, B783, 0))**

**If B782 is equal to 0 or B783 is equal to 0 or B783 is equal to 998, then skip to B790.**

B784. In what city were you when you were stopped (but not arrested) by law enforcement in the last 6 months? (Check all that apply)

- San Diego County
- Tijuana
- Other city in the US
- Other city in Mexico
- Other
- Refuse to Answer

**If B784E is equal to 1 then skip to B785**

**If not, then skip to B786.**

B785. Please specify the city where you were stopped (but not arrested) by law enforcement in the last 6 months

-----

B786. Of the [STOPPED] times you were stopped in the last 6 months, how many times did the law enforcement demand money from you as a form of bribe?

- Times
- 998 Refuse to Answer

**If B786 is greater than STOPPED and B786 is not equal to 998 then READ: "The participant's response should be less than or equal to the number of times they were stopped by the law enforcement in the past 6 months. Please check the responses." and skip to B786.**

B787. Of the [STOPPED] times you were stopped in the last 6 months, how many times did the law enforcement confiscate and never return your money or other valuables?

- Times
- 998 Refuse to Answer

**If B787 is greater than STOPPED and B787 is not equal to 998 then READ: "The participant's response should be less than or equal to the number of times they were stopped by the law enforcement in the past 6 months. Please check the responses." and skip to B787.**

B788. Of the [STOPPED] times you were stopped in the last 6 months, how many times have law enforcement confiscated your clean syringes without arrest?

\_\_\_ Times  
998 Refuse to Answer

*If B788 is greater than STOPPED and B788 is not equal to 998 then READ: "The participant's response should be less than or equal to the number of times they were stopped by the law enforcement in the past 6 months. Please check the responses." and skip to B788.*

B789. Of the [STOPPED] times you were stopped in the last 6 months, how many times have law enforcement confiscated your used syringes without arrest?

\_\_\_ # of Times  
998 Refuse to Answer

*If B789 is greater than STOPPED and B789 is not equal to 998 then READ: "The participant's response should be less than or equal to the number of times they were stopped by the law enforcement in the past 6 months. Please check the responses." and skip to B789.*

B790. Have you ever been arrested by law enforcement?  
**By arrest I mean experiences when police have taken you to the police station and there was a formal record made of this event.**

1 Yes  
0 No  
8 Refuse to Answer

*If B790 is not equal to 1, then skip to B797.*

B791. In what city were you when you were arrested by law enforcement? (Check all that apply)

\_\_\_ San Diego County  
\_\_\_ Tijuana  
\_\_\_ Other city in the US  
\_\_\_ Other city in Mexico  
\_\_\_ Other  
\_\_\_ Refuse to Answer

*If B791E is equal to 1 then skip to B792*

*If not, then skip to instruction before B793.*

B792. Please specify the city where you were arrested by law enforcement

-----

**READ: INTERVIEWER READ TO THE RESPONDENT: Now I will ask you specifically about arrest experiences you have had.**

B793. In the last 6 months, how many times were you arrested?

**Interviewer: if participant has difficulty calculating a response for the 6-month period, please assist by promoting for an estimate of frequency of events (times per week or month); then calculate an estimate based on frequency of encounters per month or per week (e.g. once a week multiplied by 26 weeks = 26 times, or twice per month multiplied by 6 months = 12 times)]**

\_\_\_\_\_ times

998 Refuse to Answer *Skip to instruction before Q1*

*If B793 is equal to 0 or B793 is equal to 998, then skip to B797.*

B794. In what city were you when you were arrested by law enforcement in the last 6 months? (Check all that apply)

\_\_\_ San Diego County

\_\_\_ Tijuana

\_\_\_ Other city in the US

\_\_\_ Other city in Mexico

\_\_\_ Other

\_\_\_ Refuse to Answer

*If B794E is equal to 1 then skip to B795*

*If not, then skip to B796.*

B795. Please specify the city where you were arrested by law enforcement In the last 6 months

-----



B796. Of the [Response to B793] times you were arrested in the last 6 months, how many times were you sentenced to jail time?

- \_\_\_ \_\_\_ times
- 997 Don't Know
- 998 Refuse to Answer

**If B796 is greater than B793 and B796 is not equal to 997 and B796 is not equal to 998 then READ: "The participant's response should be less than or equal to the number of times they were arrested in the past 6 months. Please check the responses." and skip to B796.**

B797. In the last 6 months how many times have you been physically beaten (hit, punched, or kicked) by anyone?

- \_\_\_ \_\_\_ # of Times
- 998 Refuse to Answer

**If B797 is equal to 0 or B797 is equal to 998, then skip to instruction before B802.**

B798. Of those [Response to B797] times you were beaten in the last 6 months, how many times were you beaten by law enforcement officials?

- \_\_\_ \_\_\_ # of Times
- 998 Refuse to Answer

**If B798 is greater than B797 and B798 is not equal to 998 then READ: "The participant's response should be less than or equal to the number of times they were physically beaten (hit, punched, or kicked) by anyone in the past 6 months. Please check the responses." and skip to B798.**

**If B798 is greater than 0 and B798 is not equal to 998 then skip to B799**

**If not, then skip to B801.**

B799. In what city have you been physically beaten by law enforcement officials? (Check all that apply)

- San Diego County
- Tijuana
- Other city in the US
- Other city in Mexico
- Other
- Refuse to Answer

***If B799E is equal to 1 then skip to B800***

***If not, then skip to B801.***

B800. Please specify the city where you have been physically beaten by law enforcement officials

-----

B801. Of those [Response to B797] times you were beaten in the last 6 months, how many times were you beaten by your intimate partner?

- # of Times
- 998 Refuse to Answer

***If B801 is greater than B797 and B801 is not equal to 998 then READ: "The participant's response should be less than or equal to the number of times they were beaten in the past 6 months. Please check the responses." and skip to B801.***

## Attitudes

**READ: INTERVIEWER READ TO THE RESPONDENT: The next set of questions will ask you for your opinion about a number of different scenarios in the US and in Mexico. I would like to know how likely you think it is that these things might happen to you in the future.**

B802. How likely do you think it is that you could get arrested for drug possession if you are stopped by the police when you are carrying drugs in [LCOUNTRY]? (Choose one)

- 1 Very unlikely
- 2 Somewhat unlikely
- 3 Somewhat likely
- 4 Very likely
- 8 Refuse to Answer

B803. How likely do you think it is that you could get arrested for paraphernalia possession if you are stopped by the police when you are carrying new, unused syringes in [LCOUNTRY]? (Choose one)

- 1 Very unlikely
- 2 Somewhat unlikely
- 3 Somewhat likely
- 4 Very likely
- 8 Refuse to Answer

B804. How likely do you think it is that you could get arrested for paraphernalia possession if you are stopped by the police when you are carrying used syringes in [LCOUNTRY]? (Choose one)

- 1 Very unlikely
- 2 Somewhat unlikely
- 3 Somewhat likely
- 4 Very likely
- 8 Refuse to Answer

B805. How likely do you think it is that police would demand a bribe from you if they stop you when you are carrying new, unused syringes in [LCOUNTRY]? (Choose one)

- 1 Very unlikely
- 2 Somewhat unlikely
- 3 Somewhat likely
- 4 Very likely
- 8 Refuse to Answer

B806. How likely do you think it is that police would demand a bribe from you if they stop you when you are carrying used syringes in [LCOUNTRY]? (Choose one)

- 1 Very unlikely
- 2 Somewhat unlikely
- 3 Somewhat likely
- 4 Very likely
- 8 Refuse to Answer

B807. How likely do you think it is that you will be arrested in [LCOUNTRY] just because what you look like or what you are wearing? (Choose one)

- 1 Very unlikely
- 2 Somewhat unlikely
- 3 Somewhat likely
- 4 Very likely
- 8 Refuse to Answer

INCARCERATION EXPERIENCES

READ: INTERVIEWER READ TO THE RESPONDENT: Now I'm going to ask you some questions about your experiences with prisons and jails.

For the next few questions, prisons refers to federal level institutions and jails refer to state- or County-level institutions (not municipal-level) where you were held with or without sentencing.

In Mexico Centros de Readapacion Social Penitenciaría La Mesa o El Hongo and in the US The Federal Bureau of Prisons classifies prisons into several categories: United States Penitentiaries; Federal correctional institutions; Private correctional institutions; Federal prison camps; Administrative facilities; Federal correctional complexes.

- B808. Have you ever been in prison? 1 Yes, 0 No, 8 Refuse to Answer

If B808 is not equal to 1, then skip to B812.

- B809. Since you started injecting drugs, how many times have you been in prison? \_\_\_ times, 998 Refuse to Answer

If B809 is equal to 0 or B809 is equal to 998, then skip to B811.

- B810. Since you started injecting, what is the total time you have spent in prison? \_\_\_ YEARS, \_\_\_ MONTHS, \_\_\_ DAYS, 98 Refuse to Answer (Years), 99 Not Applicable (Years)

- B811. Were you in prison the first time you injected drugs? 1 Yes, 0 No, 8 Refuse to Answer

**INCARCERATION EXPERIENCES**

- B812. Have you ever been in jail?
- |  |   |                  |
|--|---|------------------|
|  | 1 | Yes              |
|  | 0 | No               |
|  | 8 | Refuse to Answer |

***If B812 is not equal to 1, then skip to instruction before B816.***

- B813. Since you started injecting drugs, how many times have you been in jail?
- |  |         |                  |
|--|---------|------------------|
|  | _ _ _ _ | times            |
|  | 998     | Refuse to Answer |

***If B813 is equal to 0 or B813 is equal to 998, then skip to B815.***

- B814. Since you started injecting, what is the total time you have spent in jail?
- |  |     |                          |
|--|-----|--------------------------|
|  | _ _ | YEARS                    |
|  | _ _ | MONTHS                   |
|  | _ _ | DAYS                     |
|  | 98  | Refuse to Answer (Years) |
|  | 99  | Not Applicable (Years)   |

- B815. Were you in jail the first time you injected drugs?
- |  |   |                  |
|--|---|------------------|
|  | 1 | Yes              |
|  | 0 | No               |
|  | 8 | Refuse to Answer |

***If B811 is equal to 1 and B815 is equal to 1 then READ: "The participant indicated the first time the participant injected was in Prison. Now the participant indicated the first time was in Jail. Please, revise accordingly." and skip to B815.***

***If B808 is not equal to 1 and B812 is not equal to 1, then skip to instruction before B837.***

***READ: INTERVIEWER READ TO THE RESPONDENT: Interviewer read: Now I'm going to ask you about your jail/prison experience in the past 6 months.***

B816. In the last 6 MONTHS, how many times have you been in jail/prison?

\_\_\_ times  
998 Refuse to Answer

*If B816 is equal to 0 or B816 is equal to 998, then skip to instruction before B837.*

B817. In what city were you in jail/prison in the last 6 months? (Check all that apply)

- \_\_\_ San Diego County
- \_\_\_ Tijuana
- \_\_\_ Other city in the US
- \_\_\_ Other city in Mexico
- \_\_\_ Other
- \_\_\_ Refuse to Answer

*If B817E is equal to 1 then skip to B818*

*If not, then skip to B819.*

B818. Please specify the city where you were in jail/prison in the last 6 months

-----

B819. In the last 6 MONTHS, what is the total time you spent in jail/prison?

\_\_\_ YEARS  
\_\_\_ MONTHS  
\_\_\_ DAYS  
98 Refuse to Answer (Years)

**READ: INTERVIEWER READ TO THE RESPONDENT: Now I'm going to ask you some questions regarding drug use during the last time you went to jail/prison, in the past 6 months.**

B820. In what city was the jail/prison you were at the last time? (Choose one)

- 1 San Diego County
- 2 Tijuana
- 3 Other city in the US
- 4 Other city in Mexico
- 5 Other
- 8 Refuse to Answer

***If B820 is equal to 5 then skip to B821***

***If not, then skip to B822.***

B821. Please specify the city where you were in the jail/prison the last time

-----

B822. What was the name of this jail/prison? (Choose one)

- 1 Otay Mesa Min Sec
- 2 Las Colinas
- 3 Donovan
- 4 La Mesa
- 5 El Hongo
- 6 Other
- 7 Don't Know
- 8 Refuse to Answer

***If B822 is equal to 6 then skip to B823***

***If not, then skip to B824.***

B823. Please, specify the name of other jail/prison

-----



**INCARCERATION EXPERIENCES**

B824. The last time you were in jail/prison, did you use any drugs?

|   |                  |
|---|------------------|
| 1 | Yes              |
| 0 | No               |
| 8 | Refuse to Answer |

B825. The last time you were in jail/prison, did you receive methadone, buprenorphine, or suboxone?

|   |                  |
|---|------------------|
| 1 | Yes              |
| 0 | No               |
| 8 | Refuse to Answer |

***If B825 is equal to 1 and B824 is equal to 0 then skip to B826***

***If not, then skip to instruction before B827.***

B826. How long were you on this treatment?

|          |                           |
|----------|---------------------------|
| __ __ __ | MONTHS                    |
| __ __ __ | WEEKS                     |
| __ __ __ | DAYS                      |
| 998      | Refuse to Answer (Months) |

***If B824 is not equal to 1, then skip to instruction before B836.***

B827. What drugs did you use while you were in jail/prison? (Check all that apply)

- Alcohol
- Marijuana
- Heroin by itself
- Crack cocaine by itself
- Cocaine (powder) by itself
- Heroin and cocaine together (speedball)
- Methamphetamine/crystal by itself
- Methamphetamine/crystal and heroin together
- China White by itself
- China White and heroin together
- PCP
- China White and crystal/meth together
- Hallucinogenic drugs like acid, LSD, peyote, mescaline, mushrooms
- Inhalants (for example, glue, gasoline, paint thinner, agua celeste or other chemicals)
- Tranquilizers without a prescription (Rivotril, Diazepam, Valium, Ativan or Restoril)
- OxyContin, without a prescription
- Other prescription opioids without a prescription (Vicodin, Darvon, Percocet)
- Barbiturates without a prescription (Amytal, Nembutal, and Seconal)
- Fentanyl by itself
- Fentanyl and cocaine together
- Fentanyl and heroin together
- Fentanyl and Methamphetamine/crystal together
- Fentanyl and China White together

\_\_\_ Another drug or combination that was not already mentioned

\_\_\_ Refuse to Answer

***If B827X is not equal to 1, then skip to B829.***

B828. Please specify what drug(s) you used while in jail/prison

-----

|                                                          |   |                  |
|----------------------------------------------------------|---|------------------|
| B829. Did you inject drugs while you were in jail/prison | 1 | Yes              |
|                                                          | 0 | No               |
|                                                          | 8 | Refuse to Answer |

***If B829 is not equal to 1, then skip to instruction before B836.***

|                                                                   |   |                  |
|-------------------------------------------------------------------|---|------------------|
| B830. Did you use any new syringes while you were in jail/prison? | 1 | Yes              |
|                                                                   | 0 | No               |
|                                                                   | 8 | Refuse to Answer |

***If B830 is equal to 1 then skip to B831***

***If not, then skip to B832.***

B831. On average, how many new syringes did you get in a month while in jail/prison?

|     |                  |
|-----|------------------|
| ___ | syringes         |
| 998 | Refuse to Answer |

B832. Did you use any 'used' or old needles or syringes while you were in jail/prison?

|   |                  |
|---|------------------|
| 1 | Yes              |
| 0 | No               |
| 8 | Refuse to Answer |

***If B832 is equal to 1 then skip to B833***

***If not, then skip to instruction before B836.***

B833. When injecting drugs while in jail/prison, how often did you use a syringe that you knew or suspected that it had been used before by someone else? (Choose one)

- 1 Never
- 2 Sometime
- 3 About half of the time
- 4 Often
- 5 Always
- 8 Refuse to Answer

B834. Of the times you injected with other people in jail/prison, how often did you divide up drugs with somebody else by using a syringe? This is also called back loading, piggybacking or splitting drugs wet. (Choose one)

- 1 Never
- 2 Less than half of the time
- 3 About half of the time
- 4 More than half of the time
- 5 Always
- 8 Refuse to Answer

***If B833 is not equal to 1 and B833 is not equal to 8 then skip to B835***

***If not, then skip to instruction before B836.***

B835. Of the times you injected with a syringe that had been used by somebody else in jail/prison, how often did you clean it with bleach before you used it? (Choose one)

- 1 Never
- 2 Less than half of the time
- 3 About half of the time
- 4 More than half of the time
- 5 Always
- 8 Refuse to Answer

*If B825 is equal to 1, then skip to instruction before B837.*

B836. When you got released from jail/prison, did you receive any of the following?  
**Interviewer: Read out the options and check all that apply** (Check all that apply)

- Methadone, suboxone or buprenorphine (Opiate agonist therapy) (OAT)
- Referral to a Methadone, suboxone or buprenorphine program
- Referral to other drug treatment services
- Naloxone/Narcan
- Referral to a needle exchange
- Refuse to Answer

**READ: INTERVIEWER READ TO THE RESPONDENT: Now I'm going to ask you some questions about your experiences in detention centers. For the purposes of these questions, consider a detention center as a place where you can be held for up to 72 hrs or a center where migrants who have started political asylum proceedings in the US are held in Mexico until resolution of their cases (for example: Fuerzas especiales, La 20 o Carcel Municipal o Centro Municipal de Infractores, Separos de la Judicial).**

**READ: INTERVIEWER READ TO THE RESPONDENT: I will be asking you first about experiences in detention centers in your lifetime and then in the last 6 months**

- B837. Have you ever been in a detention center?
- 1 Yes
  - 0 No
  - 8 Refuse to Answer

*If B837 is not equal to 1, then skip to instruction before B842.*

**READ: INTERVIEWER READ TO THE RESPONDENT: Now, I'm going to ask you about your experience in a detention center in the past 6 months. By detention center we mean a place where they can detain you for up to 72 hours.**

B838. In the last 6 months, how many times have you been in a detention center?

\_\_\_ times  
998 Refuse to Answer

**If B838 is equal to 0 or B838 is equal to 998, then skip to instruction before B842.**

B839. In the last 6 months, how many days have you been in a detention center?

\_\_\_ days  
98 Refuse to Answer

**If B839 is less than 2, then skip to instruction before B842.**

B840. Where was this institution located? (Check all that apply)

\_\_\_ San Diego County  
\_\_\_ Tijuana  
\_\_\_ Other city in the US  
\_\_\_ Other city in Mexico  
\_\_\_ Other  
\_\_\_ Refuse to Answer

**If B840E is not equal to 1, then skip to instruction before B842.**

B841. Please specify where was this institution located.

-----

**If B816 is greater than 0 and B816 is not equal to 998 or B839 is greater than 0 and B839 is not equal to 998 then skip to B842**

**If not, then skip to instruction before B843.**

B842. Have you been released from a prison, jail, or detention center in the last 30 days?

- 1 Yes
- 0 No
- 8 Refuse to Answer

**HCV TESTING AND TREATMENT**

**READ: INTERVIEWER READ TO THE RESPONDENT: The following questions are related to Hepatitis C**

- B843. Have you ever been tested for Hepatitis C before today?
- |   |                  |
|---|------------------|
| 1 | Yes              |
| 0 | No               |
| 7 | Don't Know       |
| 8 | Refuse to Answer |

*If B843 is equal to 1 then skip to B844*

*If not, then skip to instruction before B845.*

- B844. When did you last get tested for HCV ?  
**Interviewer: If respondent does not reply immediately, probe until you reach an approximate date.**

- |                   |                         |
|-------------------|-------------------------|
| ___ / ___ / _____ | mm / dd / yyyy          |
| 2097              | Don't Know (Year)       |
| 2098              | Refuse to Answer (Year) |
| 2099              | Not Applicable (Year)   |

*If B843 is equal to 0 then skip to B845*

*If not, then skip to instruction before B848.*



B845. Compared to other drug users in this city, how likely do you think you are to get (infected with) Hepatitis C? (Choose one)

- 1 Much more likely
- 2 A bit more likely
- 3 About the same
- 4 A bit less likely
- 5 Much less likely
- 8 Refuse to Answer

B846. Why have you never had an HCV test? (Check all that apply)

- I have never heard of Hep C
- I did not know there was a test
- I did not want to pay the cost of the test
- I never, or almost never, go to clinics or hospitals
- I did not want to know if I have HCV
- I do not care if I have HCV
- I do not know where to go to have an HCV test
- Other
- Don't Know
- Refuse to Answer

***If B846H is not equal to 1, then skip to instruction before B848.***

B847. Please specify why have you never had an HCV test:

-----

***If B843 is equal to 1 then skip to B848***

***If not, then skip to B859.***

- B848. Where were you last tested for HCV? (Choose one)
- 0 As part of a research study
  - 1 Drug treatment center
  - 2 Private clinic/doctors office
  - 3 Public clinic/hospital
  - 4 Other
  - 7 Don't Know
  - 8 Refuse to Answer

***If B848 is equal to 0 then skip to B849***

***If not, then skip to instruction before B850.***

B849. Please specify the study:

-----

***If B848 is equal to 4 then skip to B850***

***If not, then skip to B851.***

B850. Please specify the location:

-----

- B851. What was your last HCV test result? (Choose one)
- 0 Negative
  - 1 Positive
  - 2 Never got result
  - 7 Don't Know
  - 8 Refuse to Answer

***If B851 is not equal to 0 then skip to B852***

***If not, then skip to B859.***

- B852. Has a doctor/ health care worker ever told you that you had HCV?
- 1 Yes
  - 0 No
  - 7 Don't Know
  - 8 Refuse to Answer

*If B852 is equal to 1 then skip to B853*

*If not, then skip to B859.*

- B853. When did you first test positive for HCV?  
**Interviewer: If respondent does not reply immediately, probe until you reach an approximate date.**

\_\_\_ / \_\_\_\_\_ mm / yyyy

- 2097 Don't Know (Year)
- 2098 Refuse to Answer (Year)

- B854. Has a doctor/ health care worker ever offered you treatment for HCV?
- 1 Yes
  - 0 No
  - 7 Don't Know
  - 8 Refuse to Answer

*If B854 is not equal to 1, then skip to B859.*

- B855. Have you ever taken medicines given to you by a doctor to prevent you from getting sick from HCV?

- 1 Yes
- 0 No
- 7 Don't Know
- 8 Refuse to Answer

*If B855 is not equal to 1, then skip to B859.*

- B856. Did you finish your treatment?
- |   |                  |
|---|------------------|
| 1 | Yes              |
| 0 | No               |
| 7 | Don't Know       |
| 8 | Refuse to Answer |

***If B856 is not equal to 0, then skip to B859.***

- B857. Why did you not finish your treatment?  
**Interviewer: Read out the options and check all that apply**  
 (Check all that apply)

- I feel good/healthy
- I have other medical conditions
- I don't have insurance
- I don't have money
- I'm doing drugs/drinking
- I missed my appointment
- My doctor prescribed some pills but I refused
- My doctor said I don't need any medicines
- I stopped seeing my doctor/ never went back
- I have no doctor/not in care
- I didn't know there is a treatment available
- I didn't want to get injections
- Other
- Don't Know
- Refuse to Answer

***If B857M is equal to 1 then skip to B858***

***If not, then skip to B859.***

B858. Please specify the reason for not taking the medicine

-----

B859. Treatments are now available that are a pill a day for 8-12 weeks which can cure >90% of people of their HCV with little to no side effects. Would you be willing to be treated?

- 1 Yes
- 0 No
- 7 Don't Know
- 8 Refuse to Answer

***If B859 is equal to 0 then skip to B860***

***If not, then skip to instruction before B861.***

B860. Can you tell me why you would not be willing to be treated for HCV?

-----

## HIV/AIDS

**READ: INTERVIEWER READ TO THE RESPONDENT: We are doing very well. Now we are going to talk about HIV/AIDS. Im going to ask you some general questions and then some questions about your experience with HIV testing and treatment.**

B861. Compared to other drug users in this city, how likely do you think you are to get (infected with) HIV/AIDS? (Choose one)

- |   |                                       |
|---|---------------------------------------|
| 1 | Much more likely                      |
| 2 | A bit more likely                     |
| 3 | About the same                        |
| 4 | A bit less likely                     |
| 5 | Much less likely                      |
| 6 | Not Applicable (already HIV positive) |
| 8 | Refuse to Answer                      |

***If B861 is equal to 6, then skip to B865.***

|                                                            |   |                  |
|------------------------------------------------------------|---|------------------|
| B862. Have you ever been tested for HIV/AIDS before today? | 1 | Yes              |
|                                                            | 0 | No               |
|                                                            | 7 | Don't Know       |
|                                                            | 8 | Refuse to Answer |

***If B862 is equal to 0 then skip to B863***

***If not, then skip to instruction before B865.***

B863. Why have you never had an HIV test?

**Interviewer: Read out the options and check all that apply** (Check all that apply)

- \_\_\_ I didn't want to pay the cost of the test
- \_\_\_ I never, or almost never, go to clinics or hospitals
- \_\_\_ I don't want to know if I have HIV/AIDS
- \_\_\_ I don't care if I have HIV/AIDS
- \_\_\_ I don't know where to go to have an HIV test
- \_\_\_ Other
- \_\_\_ Don't Know
- \_\_\_ Refuse to Answer

***If B863F is not equal to 1, then skip to instruction before B865.***

B864. Please specify why have you never had an HIV test:

-----

***If B862 is equal to 1 then skip to B865***

***If not, then skip to instruction before B870.***

B865. Where were you last tested for HIV?

**Interviewer: Read out the options and choose only one.**

(Choose one)

- 0 As part of a research study
- 1 Drug treatment center
- 2 Private clinic/doctors office
- 3 Public clinic/hospital
- 4 Other
- 7 Don't Know
- 8 Refuse to Answer

***If B865 is equal to 0 then skip to B866***

***If not, then skip to instruction before B867.***

B866. Please specify the study:

-----

***If B865 is equal to 4 then skip to B867***

***If not, then skip to B868.***

B867. Please specify the location:

-----

B868. When were you last tested for HIV?

**Interviewer: If respondent does not reply immediately, probe until you reach an approximate date.**

|             |                         |
|-------------|-------------------------|
| ___ / _____ | mm / yyyy               |
| 2097        | Don't Know (Year)       |
| 2098        | Refuse to Answer (Year) |

B869. What was your last HIV/AIDS test result? (Choose one)

|   |                  |
|---|------------------|
| 0 | Negative         |
| 1 | Positive         |
| 2 | Never got result |
| 7 | Don't Know       |
| 8 | Refuse to Answer |

***If B869 is equal to 1 then skip to B870***

***If not, then skip to instruction before B871.***

B870. When did you first test positive for HIV?

**Interviewer: If respondent does not reply immediately, probe until you reach an approximate date.**

|             |                         |
|-------------|-------------------------|
| ___ / _____ | mm / yyyy               |
| 2097        | Don't Know (Year)       |
| 2098        | Refuse to Answer (Year) |

***If B869 is equal to 1 or B869 is equal to 2 then skip to B871***



***If not, then skip to B878.***

B871. Has a doctor/ health care worker ever told you that you had HIV/AIDS?

|   |                  |
|---|------------------|
| 1 | Yes              |
| 0 | No               |
| 7 | Don't Know       |
| 8 | Refuse to Answer |

***If B871 is not equal to 1, then skip to B878.***

B872. Has a doctor/ health care worker ever offered you treatment for HIV/AIDS?

|   |                  |
|---|------------------|
| 1 | Yes              |
| 0 | No               |
| 7 | Don't Know       |
| 8 | Refuse to Answer |

***If B872 is not equal to 1, then skip to B878.***

B873. Have you ever taken medicines given to you by a doctor to prevent you from getting sick from HIV/AIDS?

|   |                  |
|---|------------------|
| 1 | Yes              |
| 0 | No               |
| 7 | Don't Know       |
| 8 | Refuse to Answer |

***If B873 is not equal to 1, then skip to B878.***

B874. Are you still taking these medicines?

|   |                  |
|---|------------------|
| 1 | Yes              |
| 0 | No               |
| 7 | Don't Know       |
| 8 | Refuse to Answer |

***If B874 is not equal to 0, then skip to B878.***



**If B876O is equal to 1 then skip to B877**

**If not, then skip to B878.**

B877. Please specify the reason for not taking the medicine

-----

- |                                                          |   |                  |
|----------------------------------------------------------|---|------------------|
| B878. Have you known anyone personally who has HIV/AIDS? | 1 | Yes              |
|                                                          | 0 | No               |
|                                                          | 7 | Don't Know       |
|                                                          | 8 | Refuse to Answer |

**If B878 is equal to 1 then skip to B879**

**If not, then skip to instruction before B881.**

- |                        |       |                  |
|------------------------|-------|------------------|
| B879. How many people? | _____ | persons          |
|                        | 997   | Don't Know       |
|                        | 998   | Refuse to Answer |

- |                                                                        |       |                  |
|------------------------------------------------------------------------|-------|------------------|
| B880. How many people do you personally know who have died of HIV/AIDS | _____ | persons          |
|                                                                        | 997   | Don't Know       |
|                                                                        | 998   | Refuse to Answer |

**PrEP SECTION**

**READ: INTERVIEWER READ TO THE RESPONDENT:**

*Pre-exposure prophylaxis or PrEP is a medicine people at risk for HIV take to prevent getting HIV from sex or injection drug use. When taken daily as prescribed, PrEP works very well to prevent HIV. PrEP is not yet widely available in Mexico, but it has been available in the US for several years. PrEP is safe, but some people experience side effects like diarrhea, nausea, and headaches. These side effects usually go away with time. PrEP does not protect against other sexually transmitted infections (STIs), so it is important to also use condoms while taking PrEP. Because PrEP does not treat HIV, it is also important to see a doctor every three months for HIV/STI testing and other laboratory tests to make sure everything is OK.*

B881. Before today, had you ever heard of HIV-negative people taking HIV medications or PrEP **before** being exposed to HIV to protect against HIV infection?

- 1 Yes
- 0 No
- 8 Refuse to Answer

*If B881 is not equal to 1, then skip to B889.*

B882. Have you ever taken HIV medications or PrEP **before** being exposed to HIV to protect against HIV infection?

- 1 Yes
- 0 No
- 8 Refuse to Answer

*If B882 is not equal to 1, then skip to B889.*

B883. In what city did a doctor prescribed you PrEP therapy? (Check all that apply)

- San Diego County
- Tijuana
- Other city in the US
- Other city in Mexico
- Other
- Don't Know
- Refuse to Answer

**If B883E is not equal to 1, then skip to B885.**

B884. Please specify the city

-----

|                                              |   |                  |
|----------------------------------------------|---|------------------|
| B885. Are you currently taking PrEP therapy? | 1 | Yes              |
|                                              | 0 | No               |
|                                              | 7 | Don't Know       |
|                                              | 8 | Refuse to Answer |

**If B885 is not equal to 1, then skip to B889.**

B886. When did you start your current PrEP therapy?

**Interviewer: If respondent does not reply immediately, probe until you reach an approximate date.**

|             |                         |
|-------------|-------------------------|
| ___ / _____ | mm / yyyy               |
| 2097        | Don't Know (Year)       |
| 2098        | Refuse to Answer (Year) |

B887. Which PrEP therapy are you currently taking? (Choose one)

|    |                                                  |
|----|--------------------------------------------------|
| 01 | Truvada (once daily, orally)                     |
| 02 | Maraviroc (once daily, orally)                   |
| 03 | Rilpivirine (once monthly, injection)            |
| 04 | Dapivirine (vaginal ring worn 4 weeks at a time) |
| 05 | Tenofovir (gelinserted rectally/vaginally)       |
| 06 | Cabotegravir (injectable PrEP)                   |
| 07 | Other                                            |
| 97 | Don't Know                                       |
| 98 | Refuse to Answer                                 |

**If B887 is not equal to 7, then skip to B889.**

B888. Please specify which other PrEP Therapy you are taking.

-----

B889. What kind of PrEP product would you be interested in taking?

**Interviewer: Read out the options and check all that apply** (Check all that apply)

- A pill I needed to take every day
- An injection I needed to get every 2 months
- (for women) A vaginal gel I needed to use before sex
- None
- Refuse to Answer
- Not Applicable

***If B889D is equal to 1 and B889A + B889B + B889C is greater than 0 then READ: "The participant indicated None along with other options. Please, revise the response." and skip to B889.***

***READ: INTERVIEWER READ TO THE RESPONDENT: Now I'm going to ask your sexual health in the past 6 months.***

B890. In the past 6 months, have you had any of the following symptoms?

**Interviewer: Read out the options and check all that apply** (Check all that apply)

- Painful or very frequent urination
- Painful sore or blisters on your genitals
- Warts on your genitals
- Dripping or oozing from your genitals
- Itching in your genital area
- Bleeding after intercourse
- I have not had any of these symptoms
- Don't Know
- Refuse to Answer

**If B890G is equal to 1 and B890A + B890B + B890C + B890D + B890E + B890F is greater than 0 then READ: "The participant indicated "I have not had any of these symptoms" along with other options. Please, revise the response." and skip to B890.**

B891. In the past 6 months, have you been diagnosed with any of the following health problems?  
**Interviewer: Read out the options and check all that apply** (Check all that apply)

- Gonorrhea (the clap or the drip)
- Chlamydia, Non-Gonococcal Urethritis (NGU), Non-specific Urethritis (NSU)
- Syphilis (VDRL or RPR)
- Genital or anal warts (in, on, or around the vagina or anus)
- Genital or anal herpes (in, on, or around the vagina or anus)
- Chancroid (sore or ulcer in or around the vagina or anus)
- Hepatitis B
- Hepatitis C
- Trichomoniasis
- Pelvic inflammatory disease
- Vaginal candidiasis (yeast infection)
- Cervical cancer
- Unknown STD
- Other female problems
- I have not been diagnosed with any sexually transmitted disease
- Don't Know
- Refuse to Answer

**If B891O is equal to 1 and B891A + B891B + B891C + B891D + B891E + B891F + B891G + B891H + B891I + B891J + B891K + B891L + B891M + B891N is greater than 0 then READ: "The participant indicated "I have not had any of these symptoms" along with other options. Please, revise the response." and skip to B891.**

**If B891N is not equal to 1, then skip to B893.**

B892. Please, specify other female problems

-----

B893. In the past 6 months, did you receive treatment or medication by a doctor or nurse to treat any symptoms in your genital area?

- 1 Yes
- 0 No
- 8 Refuse to Answer



**SEXUAL BEHAVIOR**

**READ: INTERVIEWER READ TO THE RESPONDENT:** *You are doing a great job. I will now ask you about your sexual experiences in the past 6 months. If you have been in prison/jail during this period, these questions refer to the time when you haven't been in prison/jail. Again, I know some of these questions may be uncomfortable to answer, but they will be very helpful to us in preventing diseases among you and other people like you. Please try to be as truthful and honest as you can. For these questions, when I say "sex", I mean vaginal or anal or oral sex. When we talk about using protection we mean using a male or female condom or a barrier to prevent the mixing of body fluids during sexual activity.*

B894. How old were you the **first time** you had consensual anal, vaginal, or oral sex? By consensual sex, I mean you willingly agreed to have sex.

**Interviewer: Please enter 0 for Never had consensual sex**

\_\_\_ years old

98 Refuse to Answer

*If B894 is greater than A1 and B894 is not equal to 98 then READ: "Participant has responded with a length of time greater than his or her age. Please check the responses." and skip to B894.*

*If B894 is equal to 0 or B894 is equal to 98, then skip to B896.*

B895. The first time you had consensual sex, was it with a male or female? (Choose one)

1 Male

2 Female

3 Both

8 Refuse to Answer

B896. Do you think of yourself as: (Choose one)

1 Heterosexual/Straight

2 Homosexual/Gay/Lesbian

3 Bisexual

4 Other

8 Refuse to Answer

*If B896 is equal to 4 then skip to B897*

*If not, then skip to instruction before B898.*

B897. Please specify other:

-----

*If B26 is equal to 1 then skip to instruction before B898*

*If not, then skip to B899.*

**READ: INTERVIEWER READ TO THE RESPONDENT: Next I am going to show you some pictures. This picture is of a penis that has been circumcised (the skin that covers the tip of the penis was removed,) and this one is of a penis that is uncircumcised (the skin that covers the tip is still there).**

|                            |   |                  |
|----------------------------|---|------------------|
| B898. Are you circumcised? | 1 | Yes              |
|                            | 0 | No               |
|                            | 8 | Refuse to Answer |

|                                                                                                                                                                                         |       |                  |
|-----------------------------------------------------------------------------------------------------------------------------------------------------------------------------------------|-------|------------------|
| B899. How many women have you ever had sex with?<br><b>Remember that, by sex, I mean vaginal, anal, or oral sex.</b><br><b>Interviewer, please enter 0 for Never had sex with women</b> | _____ | women            |
|                                                                                                                                                                                         | 9998  | Refuse to Answer |

|                                                                                                                                                                                     |       |                  |
|-------------------------------------------------------------------------------------------------------------------------------------------------------------------------------------|-------|------------------|
| B900. How many men have you ever had sex with?<br><b>Remember that, by sex, I mean vaginal, anal, or oral sex.</b><br><b>Interviewer, please enter 0 for Never had sex with men</b> | _____ | men              |
|                                                                                                                                                                                     | 9998  | Refuse to Answer |

|                                                      |   |                  |
|------------------------------------------------------|---|------------------|
| B901. Have you had any sex during the past 6 months? | 1 | Yes              |
|                                                      | 0 | No               |
|                                                      | 8 | Refuse to Answer |

*If B901 is not equal to 1, then skip to B944.*

B902. In what city have you had sex in the last 6 months? (Check all that apply)

- San Diego County
- Tijuana
- Another location in the US
- Another location in Mexico
- Other
- Don't Know
- Refuse to Answer

*If B902E is equal to 1 then skip to B903*

*If not, then skip to B904.*

B903. Please specify the location where you had sex in the last 6 months

-----

B904. During the past 6 months, have you had sex with men, women or both? (Choose one)

- 1 Men
- 2 Women
- 3 Both
- 8 Refuse to Answer

**READ: INTERVIEWER READ TO THE RESPONDENT: Now I will ask you about your regular partner. By regular, we mean someone that you feel committed to above anyone else and with whom you have sex**

B905. In the **past 6 months** did you have a **regular partner** that you feel committed to above anyone else and with whom you had/have sex? (If you have more than one regular partner, think about the one you have sex with the most)

- 1 Yes
- 0 No
- 8 Refuse to Answer

***If B905 is not equal to 1, then skip to instruction before B916.***

- B906. What is the gender of this sex partner? (Choose one)
- |   |                  |
|---|------------------|
| 1 | Male             |
| 2 | Female           |
| 3 | Transgender      |
| 8 | Refuse to Answer |

***If B906 is not equal to 3, then skip to B908.***

- B907. If Transgender, select which. (Choose one)
- |   |                      |
|---|----------------------|
| 1 | Female to Male (FTM) |
| 2 | Male to Female (MTF) |
| 8 | Refuse to Answer     |

- B908. Was this **regular partner** a client?
- |   |                  |
|---|------------------|
| 1 | Yes              |
| 0 | No               |
| 8 | Refuse to Answer |

***If B906 is equal to 1 or B907 is equal to 2 then skip to B909***

***If not, then skip to B910.***

- B909. Is your regular partner circumcised?
- |   |                  |
|---|------------------|
| 1 | Yes              |
| 0 | No               |
| 7 | Don't Know       |
| 8 | Refuse to Answer |
- B910. What country does this person live in? (Choose one)
- |   |                  |
|---|------------------|
| 1 | US               |
| 2 | Mexico           |
| 3 | Other            |
| 8 | Refuse to Answer |

***If B910 is not equal to 3, then skip to B912.***

B911. Please, specify other country

-----

B912. In the past 6 months, how often did you have vaginal sex with your regular partner? (Choose one)

- 1 Never
- 2 Once or twice
- 3 Every few months
- 4 Every few weeks
- 5 At least once a week
- 6 Several times a week
- 8 Refuse to Answer

B913. In the past 6 months, how often did you have anal sex with your regular partner? (Choose one)

- 1 Never
- 2 Once or twice
- 3 Every few months
- 4 Every few weeks
- 5 At least once a week
- 6 Several times a week
- 8 Refuse to Answer

B914. In the **past 6 months** when you had sex with your **regular partner**, how often was a condom used?  
(Choose one)

- 1 Never
- 2 Sometimes
- 3 About half of the time
- 4 Often
- 5 Always
- 8 Refuse to Answer

B915. Did you have **UNPROTECTED** (without a condom) sex the last time you had sex with your **regular partner**?

- 1 Yes
- 0 No
- 8 Refuse to Answer
- 9 Not Applicable

**READ: INTERVIEWER READ TO THE RESPONDENT: Now I will ask you about your casual partners. By casual, we mean partners with whom you have sex with but do not receive goods or services in exchange for sex, apart from your regular partner.**

B916. In the **past 6 months**, how many **casual** partners did you have sex with?

- — — — partners
- 9998 Refuse to Answer

**If B916 is equal to 0 or B916 is equal to 9998, then skip to B940.**

B917. Were these **casual partners** clients that someone gave you money, drugs or something else in exchange for sex?

- 1 Yes
- 0 No
- 8 Refuse to Answer

B918. How many of those **casual** partners ([Response to B916]) were males?

\_\_\_\_\_

9998

Refuse to Answer

***If B918 is greater than B916 and B918 is not equal to 9998 then READ: "The participant's response should be less than or equal to the number of casual partners with whom you have sex besides regular partner. Please check the responses." and skip to B916.***

***If B918 is equal to 0 or B918 is equal to 9998, then skip to instruction before B922.***

B919. How many male casual partners were from the US?

\_\_\_\_\_

9998

Refuse to Answer

***If B919 is greater than B918 and B919 is not equal to 9998 then READ: "The participant's response should be less than or equal to the number of male casual partners with whom you have sex besides regular partner. Please check the responses." and skip to B919.***

***If B919 is equal to B918, then skip to instruction before B922.***

B920. How many male casual partners were from Mexico?

\_\_\_\_\_

9998

Refuse to Answer

***If B919 + B920 is greater than B918 and B919 is not equal to 9998 and B920 is not equal to 9998 then READ: "The participant's response should be less than or equal to the number of male casual partners with whom you have sex besides regular partner. Please check the responses." and skip to B920.***

***If B919 + B920 is equal to B918, then skip to instruction before B922.***

B921. How many male casual partners were from other countries?

\_\_\_\_\_

9998

Refuse to Answer

***If B919 + B920 + B921 is greater than B918 and B919 is not equal to 9998 and B920 is not equal to 9998 and B921 is not equal to 9998 then READ: "The participant's response should be less than or equal to the number of male casual partners with whom you have sex besides regular partner. Please check the responses." and skip to B921.***

***If B918 is equal to B916, then skip to instruction before B930.***

B922. How many of those **casual** partners ([Response to B916]) were females?

\_\_\_\_\_

9998

Refuse to Answer

**If B918 + B922 is greater than B916 and B918 is not equal to 9998 and B922 is not equal to 9998 then READ: "The participant's response should be less than or equal to the number of casual partners with whom you have sex besides regular partner. Please check the responses." and skip to B916.**

**If B922 is equal to 0 or B922 is equal to 9998, then skip to instruction before B926.**

B923. How many female casual partners were from the US? \_\_\_\_\_

9998 Refuse to Answer

**If B923 is greater than B922 and B923 is not equal to 9998 then READ: "The participant's response should be less than or equal to the number of female casual partners with whom you have sex besides regular partner. Please check the responses." and skip to B923.**

**If B923 is equal to B922, then skip to instruction before B926.**

B924. How many female casual partners were from Mexico? \_\_\_\_\_

9998 Refuse to Answer

**If B923 + B924 is greater than B922 and B923 is not equal to 9998 and B924 is not equal to 9998 then READ: "The participant's response should be less than or equal to the number of female casual partners with whom you have sex besides regular partner. Please check the responses." and skip to B924.**

**If B923 + B924 is equal to B922, then skip to instruction before B926.**

B925. How many female casual partners were from other countries? \_\_\_\_\_

9998 Refuse to Answer

**If B923 + B924 + B925 is greater than B922 and B923 is not equal to 9998 and B924 is not equal to 9998 and B925 is not equal to 9998 then READ: "The participant's response should be less than or equal to the number of female casual partners with whom you have sex besides regular partner. Please check the responses." and skip to B925.**

**If B918 + B922 is equal to B916, then skip to instruction before B930.**

B926. How many of those **casual** partners ([Response to B916]) were transgender? \_\_\_\_\_

9998 Refuse to Answer

**If B918 + B922 + B926 is not equal to B916 and B918 is not equal to 9998 and B922 is not equal to 9998 and B926 is not equal to 9998 then READ: "The participant's response should be less than or equal to the number of transgender casual partners with whom you have sex besides regular partner. Please check the responses." and skip to B916.**



**If B926 is equal to 0 or B926 is equal to 9998, then skip to instruction before B930.**

B927. How many transgender casual partners were from the US? \_\_\_\_\_

9998 Refuse to Answer

**If B927 is greater than B926 and B927 is not equal to 9998 then READ: "The participant's response should be less than or equal to the number of transgender casual partners with whom you have sex besides regular partner. Please check the responses." and skip to B927.**

**If B927 is equal to B926, then skip to instruction before B930.**

B928. How many transgender casual partners were from Mexico? \_\_\_\_\_

9998 Refuse to Answer

**If B927 + B928 is greater than B926 and B927 is not equal to 9998 and B928 is not equal to 9998 then READ: "The participant's response should be less than or equal to the number of transgender casual partners with whom you have sex besides regular partner. Please check the responses." and skip to B928.**

**If B927 + B928 is equal to B926, then skip to instruction before B930.**

B929. How many transgender casual partners were from other countries? \_\_\_\_\_

9998 Refuse to Answer

**If B927 + B928 + B929 is greater than B926 and B927 is not equal to 9998 and B928 is not equal to 9998 and B929 is not equal to 9998 then READ: "The participant's response should be less than or equal to the number of transgender casual partners with whom you have sex besides regular partner. Please check the responses." and skip to B929.**

**If B922 is greater than 0 and B922 is not equal to 9998 then skip to B930**

**If not, then skip to instruction before B934.**

B930. In the past 6 months, how often did you have vaginal sex with your female casual partners? (Choose one)

- |   |                      |
|---|----------------------|
| 1 | Never                |
| 2 | Once or twice        |
| 3 | Every few months     |
| 4 | Every few weeks      |
| 5 | At least once a week |
| 8 | Refuse to Answer     |

***If B930 is equal to 1 or B930 is equal to 8, then skip to B932.***

B931. Did you have UNPROTECTED (without a condom) vaginal sex the last time you had sex with your female casual partner?

- |   |                  |
|---|------------------|
| 1 | Yes              |
| 0 | No               |
| 8 | Refuse to Answer |
| 9 | Not Applicable   |

B932. In the past 6 months, how often did you have anal sex with your female casual partners? (Choose one)

- |   |                      |
|---|----------------------|
| 1 | Never                |
| 2 | Once or twice        |
| 3 | Every few months     |
| 4 | Every few weeks      |
| 5 | At least once a week |
| 8 | Refuse to Answer     |

***If B932 is equal to 1 or B932 is equal to 8, then skip to instruction before B934.***

B933. Did you have UNPROTECTED (without a condom) anal sex the last time you had sex with your female casual partner?

- 1 Yes
- 0 No
- 8 Refuse to Answer
- 9 Not Applicable

*If B918 is greater than 0 and B918 is not equal to 9998 then skip to B934*

*If not, then skip to instruction before B938.*

B934. In the past 6 months, how often did you have vaginal sex with your male casual partners? (Choose one)

- 1 Never
- 2 Once or twice
- 3 Every few months
- 4 Every few weeks
- 5 At least once a week
- 8 Refuse to Answer

*If B934 is equal to 1 or B934 is equal to 8, then skip to B936.*

B935. Did you have UNPROTECTED (without a condom) vaginal sex the last time you had sex with your male casual partner?

- 1 Yes
- 0 No
- 8 Refuse to Answer
- 9 Not Applicable

B936. In the past 6 months, how often did you have anal sex with your male casual partners? (Choose one)

- |   |                      |
|---|----------------------|
| 1 | Never                |
| 2 | Once or twice        |
| 3 | Every few months     |
| 4 | Every few weeks      |
| 5 | At least once a week |
| 8 | Refuse to Answer     |

*If B936 is equal to 1 or B936 is equal to 8, then skip to instruction before B938.*

B937. Did you have UNPROTECTED (without a condom) anal sex the last time you had sex with your male casual partner?

- |   |                  |
|---|------------------|
| 1 | Yes              |
| 0 | No               |
| 8 | Refuse to Answer |
| 9 | Not Applicable   |

*If B926 is greater than 0 and B926 is not equal to 9998 then skip to B938*

*If not, then skip to B940.*

B938. In the past 6 months, how often did you have sex with your transgender casual partners? (Choose one)

- |   |                      |
|---|----------------------|
| 1 | Never                |
| 2 | Once or twice        |
| 3 | Every few months     |
| 4 | Every few weeks      |
| 5 | At least once a week |
| 8 | Refuse to Answer     |

*If B938 is equal to 1 or B938 is equal to 8, then skip to B940.*

B939. Did you have UNPROTECTED (without a condom) sex the last time you had sex with your transgender casual partner?

- 1 Yes
- 0 No
- 8 Refuse to Answer
- 9 Not Applicable

B940. In the **past 6 months**, when you had sex, how often were you drunk **within 2 hours before or during sex?** ("buzzed" on alcohol) (Choose one)

- 1 Never
- 2 Sometimes
- 3 About half of the time
- 4 Often
- 5 Always
- 8 Refuse to Answer

B941. In the **past 6 months, when you had sex**, how often had you been using drugs **within 2 hours before or during sex?** (Choose one)

- 1 Never
- 2 Sometimes
- 3 About half of the time
- 4 Often
- 5 Always
- 8 Refuse to Answer

B942. In the last 6 months, have you had sex with someone who you knew at the time had HIV/AIDS?

- 1 Yes
- 0 No
- 8 Refuse to Answer

***If B942 is equal to 1 then skip to B943***

***If not, then skip to B944.***

- B943. How often did you use a condom? (Choose one)
- |   |                        |
|---|------------------------|
| 1 | Never                  |
| 2 | Sometimes              |
| 3 | About half of the time |
| 4 | Often                  |
| 5 | Always                 |
| 8 | Refuse to Answer       |

- B944. Has anyone ever given you anything you needed (such as money, drugs, alcohol, shelter, food transportation or protection) in exchange for sex?

- |   |                  |
|---|------------------|
| 1 | Yes              |
| 0 | No               |
| 8 | Refuse to Answer |

***If B917 is equal to 1 then skip to B945***

***If not, then skip to instruction before B946.***

- B945. You said earlier that you casual partner(s) gave you money, drugs or something else in exchange for sex. Could you, please, reconsider the question: Has anyone ever given you anything you needed (such as money, drugs, alcohol, shelter, food transportation or protection) in exchange for sex?

- |   |                  |
|---|------------------|
| 1 | Yes              |
| 0 | No               |
| 8 | Refuse to Answer |

***If B944 is not equal to 1 and B945 is not equal to 1, then skip to instruction before B973.***

B946. When someone has given you anything you needed in exchange for sex, what did they give you?

**Interviewer: Read out the options and check all that apply** (Check all that apply)

- Money
- Drugs
- Syringes
- Alcohol
- Shelter
- Transportation
- Protection
- Food
- A job
- Clothes
- Gifts
- Other
- Refuse to Answer

*If B946L is equal to 1 then skip to B947*

*If not, then skip to B948.*

B947. Please specify other:

-----

B948. How old were you the first time someone gave you something you needed in exchange for sex?

- years old
- 98 Refuse to Answer

*If B948 is greater than A1 and B948 is not equal to 98 then READ: "Participant has responded with a length of time greater than his or her age. Please check the responses." and skip to B948.*

*If B901 is not equal to 1, then skip to instruction before B973.*

B949. In the **last 6 months**, how many people gave you something you needed in exchange for having sex with them?

- People
- 9998 Refuse to Answer

*If B949 is equal to 0 or B949 is equal to 9998, then skip to instruction before B973.*

B950. In what cities did someone give you something in exchange for sex? (Check all that apply)

- San Diego County
- Tijuana
- Other city in the US
- Other city in Mexico
- Other
- Refuse to Answer

*If B950E is equal to 1 then skip to B951*

*If not, then skip to B952.*

B951. Please specify the other city/country

-----

B952. In the **last 6 months**, on average, how many times per month did someone give you something you needed in exchange for having sex with them?

**Interviewer: If the participant says Do not know, ask them what is their best guess or estimate.**

- 998 Refuse to Answer



B953. Which of the following has someone given you in the **last 6 months** in exchange for having sex with them?

**Interviewer: Read out the options and check all that apply** (Check all that apply)

- Money
- Drugs
- Syringes
- Alcohol
- Shelter
- Transportation
- Protection
- Food
- A job
- Clothes
- Gifts
- Other
- Refuse to Answer

***If B953L is equal to 1 then skip to B954***

***If not, then skip to B955.***

B954. Please specify other:

-----

B955. In the **last 6 months**, when someone gave you something you needed in exchange for sex, how many of these people ([Response to B949]) were males?

-----

9998 Refuse to Answer

***If B955 is greater than B949 and B955 is not equal to 9998 then READ: "The participant's response should be less than or equal to the number of people that gave them something in exchange for sex! Please check the responses and make corrections!" and skip to B955.***

**If B955 is equal to 0 or B955 is equal to 9998, then skip to instruction before B959.**

B956. How many males gave you something you needed in exchange for sex were from the US?

\_\_\_\_\_

9998 Refuse to Answer

**If B956 is greater than B955 and B956 is not equal to 9998 then READ: "The participant's response should be less than or equal to the number of males gave them something they needed in exchange for sex. Please check the responses." and skip to B956.**

**If B956 is equal to B955, then skip to instruction before B959.**

B957. How many males gave you something you needed in exchange for sex were from Mexico?

\_\_\_\_\_

9998 Refuse to Answer

**If B956 + B957 is greater than B955 and B956 is not equal to 9998 and B955 is not equal to 9998 then READ: "The participant's response should be less than or equal to the number of males gave them something they needed in exchange for sex. Please check the responses." and skip to B957.**

**If B956 + B957 is equal to B955, then skip to instruction before B959.**

B958. How many males gave you something you needed in exchange for sex were from other countries?

\_\_\_\_\_

9998 Refuse to Answer

**If B956 + B957 + B958 is greater than B955 and B956 is not equal to 9998 and B957 is not equal to 9998 and B958 is not equal to 9998 then READ: "The participant's response should be less than or equal to the number of males gave them something they needed in exchange for sex. Please check the responses." and skip to B958.**

**If B955 is equal to B949, then skip to B963.**

B959. In the **last 6 months**, when someone gave you something you needed in exchange for sex, how many of these people ([Response to B949]) were females?

\_\_\_\_\_

9998 Refuse to Answer

**If B955 + B959 is greater than B949 and B955 is not equal to 9998 and B959 is not equal to 9998 then READ: "The participant's response should be less than or equal to the number of people gave them something in exchange for sex! Please check the responses and make corrections." and skip to B959.**

**If B959 is equal to 0 or B959 is equal to 9998, then skip to B963.**

B960. How many females gave you something you needed in exchange for sex were from the US?

\_\_\_\_\_

9998 Refuse to Answer

**If B960 is greater than B959 and B960 is not equal to 9998 then READ: "The participant's response should be less than or equal to the number of females gave them something they needed in exchange for sex. Please check the responses." and skip to B960.**

**If B960 is equal to B959, then skip to B963.**

B961. How many females gave you something you needed in exchange for sex were from Mexico?

\_\_\_\_\_

9998 Refuse to Answer

**If B960 + B961 is greater than B959 and B960 is not equal to 9998 and B959 is not equal to 9998 then READ: "The participant's response should be less than or equal to the number of females gave them something they needed in exchange for sex. Please check the responses." and skip to B961.**

**If B960 + B961 is equal to B959, then skip to B963.**

B962. How many females gave you something you needed in exchange for sex were from other countries?

\_\_\_\_\_

9998 Refuse to Answer

**If B960 + B961 + B962 is greater than B959 and B960 is not equal to 9998 and B961 is not equal to 9998 and B962 is not equal to 9998 then READ: "The participant's response should be less than or equal to the number of females gave them something they needed in exchange for sex. Please check the responses." and skip to B962.**

B963. In the **last 6 months**, when someone has given you something you needed in exchange for sex, where did you meet or know them from?

**Interviewer: Read out the options and check all that apply**

(Check all that apply)

- Street
- Work
- Shooting gallery
- Neighborhood
- School
- Bar/club
- Hotel
- Newspaper/Magazine/Internet
- Friends/ Acquaintances
- Pimp
- Other
- Refuse to Answer

*If B963K is not equal to 1, then skip to B965.*

B964. Please, specify other

-----

B965. Since the COVID epidemic began in March 2020, has the number of people who have given you something in exchange for sex changed? (Choose one)

- 1 More people
- 2 Fewer people
- 3 The same
- 8 Refuse to Answer

B966. In the **last 6 months**, how often did you have sex in exchange for something you needed? (Choose one)

- 1 Once or twice
- 2 Once or twice in a month
- 3 At least once a week
- 4 Several times a week
- 5 Several times a day
- 8 Refuse to Answer

B967. In the past 6 months, of the times you had sex in exchange for something you needed, how often did you have vaginal sex? (Choose one)

- 1 Never
- 2 Sometimes
- 3 About half of the time
- 4 Often
- 5 Always
- 8 Refuse to Answer

*If B967 is equal to 1 or B967 is equal to 8, then skip to B969.*

B968. Did you have UNPROTECTED (without a condom) sex the last time you had vaginal sex in exchange for something you needed?

- 1 Yes
- 0 No
- 8 Refuse to Answer
- 9 Not Applicable

B969. In the past 6 months, of the times you had sex in exchange for something you needed, how often did you have anal sex? (Choose one)

- |   |                        |
|---|------------------------|
| 1 | Never                  |
| 2 | Sometimes              |
| 3 | About half of the time |
| 4 | Often                  |
| 5 | Always                 |
| 8 | Refuse to Answer       |

***If B969 is equal to 1 or B969 is equal to 8, then skip to B971.***

B970. Did you have UNPROTECTED (without a condom) sex the last time you had anal sex in exchange for something you needed?

- |   |                  |
|---|------------------|
| 1 | Yes              |
| 0 | No               |
| 8 | Refuse to Answer |
| 9 | Not Applicable   |

B971. In the past 6 months, when someone has given you something you needed in exchange for sex, how frequently did you inject drugs with them? (Choose one)

- |   |                        |
|---|------------------------|
| 1 | Never                  |
| 2 | Sometimes              |
| 3 | About half of the time |
| 4 | Often                  |
| 5 | Always                 |
| 8 | Refuse to Answer       |

***If B971 is equal to 1 or B971 is equal to 8, then skip to instruction before B973.***

B972. How frequently did you share the same syringe with them? (Choose one)

- 1 Never
- 2 Sometimes
- 3 About half of the time
- 4 Often
- 5 Always
- 8 Refuse to Answer

**READ: NOTE OF CAUTION TO INTERVIEWER: It is possible that following questions could be misunderstood by some women, to where giving...in exchange for having sex with you was mistaken for receiving...in exchange for having sex with you.**

B973. Have you ever **given** someone something **they** needed (such as money, drugs, alcohol, shelter, food transportation or protection) in exchange for sex?

- 1 Yes
- 0 No
- 8 Refuse to Answer

**If B973 is not equal to 1, then skip to B992.**

B974. Was the person/people you gave money, drugs, alcohol, shelter, food, transportation or protection to in exchange for sex male, female, or transgender? (Check all that apply)

- \_\_\_ Male
- \_\_\_ Female
- \_\_\_ Transgender
- \_\_\_ Refuse to Answer

B975. In what cities were you in when you gave someone something in exchange for sex? (Check all that apply)

- \_\_\_ San Diego County
- \_\_\_ Tijuana
- \_\_\_ Other city in the US
- \_\_\_ Other city in Mexico
- \_\_\_ Other
- \_\_\_ Refuse to Answer

*If B975E is equal to 1 then skip to B976*

*If not, then skip to instruction before B977.*

B976. Please specify the other city/country

-----

*If B901 is not equal to 1, then skip to B992.*

B977. In the **last 6 months**, how many people did **you** give drugs, money, food, shelter, transportation, alcohol, or anything else in exchange for having sex with you?

- \_\_\_\_\_ People
- 9998 Refuse to Answer

*If B977 is equal to 0 or B977 is equal to 9998, then skip to B992.*



B978. In what cities were you in when you gave someone something in exchange for sex in the last 6 months?  
(Check all that apply)

- \_\_\_ San Diego County
- \_\_\_ Tijuana
- \_\_\_ Other city in the US
- \_\_\_ Other city in Mexico
- \_\_\_ Other
- \_\_\_ Refuse to Answer

*If B978E is equal to 1 then skip to B979*

*If not, then skip to B980.*

B979. Please specify the other city/country

-----

B980. How many of those [Response to B977] people were males? \_\_\_\_\_

9998 Refuse to Answer

*If B980 is greater than B977 and B980 is not equal to 9998 then READ: "The participant's response should be less than or equal to the number of people whom you give drugs, money, food, shelter, transportation, alcohol, or anything else to in exchange for having sex with you? Please check the responses." and skip to B980.*

*If B980 is equal to 0 or B980 is equal to 9998, then skip to instruction before B984.*

B981. How many male partners were from the US? \_\_\_\_\_

9998 Refuse to Answer

*If B981 is greater than B980 and B981 is not equal to 9998 then READ: "The participant's response should be less than or equal to the number of males whom you give drugs, money, food, shelter, transportation, alcohol, or anything else to in exchange for having sex with you. Please check the responses." and skip to B981.*

*If B981 is equal to B980, then skip to instruction before B984.*

B982. How many male partners were from Mexico? \_\_\_\_\_

9998 Refuse to Answer

***If B981 + B982 is greater than B980 and B981 is not equal to 9998 and B982 is not equal to 9998 then READ: "The participant's response should be less than or equal to the number of males whom you give drugs, money, food, shelter, transportation, alcohol, or anything else to in exchange for having sex with you. Please check the responses." and skip to B982.***

***If B981 + B982 is equal to B980, then skip to instruction before B984.***

B983. How many male partners were from other countries? \_\_\_\_\_

9998 Refuse to Answer

***If B981 + B982 + B983 is greater than B980 and B981 is not equal to 9998 and B982 is not equal to 9998 and B983 is not equal to 9998 then READ: "The participant's response should be less than or equal to the number of males whom you give drugs, money, food, shelter, transportation, alcohol, or anything else to in exchange for having sex with you. Please check the responses." and skip to B983.***

***If B980 is equal to B977, then skip to B992.***

B984. How many of those [Response to B977] people were females? \_\_\_\_\_

9998 Refuse to Answer

***If B980 + B984 is greater than B977 and B980 is not equal to 9998 and B984 is not equal to 9998 then READ: "The participant's response should be less than or equal to the number of people whom you give drugs, money, food, shelter, transportation, alcohol, or anything else to in exchange for having sex with you. Please check the responses." and skip to B984.***

***If B984 is equal to 0 or B984 is equal to 9998, then skip to instruction before B988.***

B985. How many female partners were from the US? \_\_\_\_\_

9998 Refuse to Answer

***If B985 is greater than B984 and B985 is not equal to 9998 then READ: "The participant's response should be less than or equal to the number of females whom you give drugs, money, food, shelter, transportation, alcohol, or anything else to in exchange for having sex with you. Please check the responses." and skip to B985.***

***If B985 is equal to B984, then skip to instruction before B988.***

B986. How many female partners were from Mexico? \_\_\_\_\_

9998 Refuse to Answer

***If B985 + B986 is greater than B984 and B985 is not equal to 9998 and B986 is not equal to 9998 then READ: "The participant's response should be less than or equal to the number of females whom you give drugs, money, food, shelter, transportation, alcohol, or anything else to in exchange for having sex with you. Please check the responses." and skip to B986.***

**If B985 + B986 is equal to B984, then skip to instruction before B988.**

B987. How many female partners were from other countries? \_\_\_\_\_

9998 Refuse to Answer

**If B985 + B986 + B987 is greater than B984 and B985 is not equal to 9998 and B986 is not equal to 9998 and B987 is not equal to 9998 then READ: "The participant's response should be less than or equal to the number of females whom you give drugs, money, food, shelter, transportation, alcohol, or anything else to in exchange for having sex with you. Please check the responses." and skip to B987.**

**If B980 + B984 is equal to B977, then skip to B992.**

B988. How many of those [Response to B977] people were transgender?

\_\_\_\_\_

9998 Refuse to Answer

**If B980 + B984 + B988 is greater than B977 and B980 is not equal to 9998 and B984 is not equal to 9998 and B988 is not equal to 9998 then READ: "The participant's response should be less than or equal to the number of people whom you give drugs, money, food, shelter, transportation, alcohol, or anything else to in exchange for having sex with you. Please check the responses." and skip to B988.**

**If B988 is equal to 0 or B988 is equal to 9998, then skip to B992.**

B989. How many transgender partners were from the US? \_\_\_\_\_

9998 Refuse to Answer

**If B989 is greater than B988 and B989 is not equal to 9998 then READ: "The participant's response should be less than or equal to the number of transgender whom you give drugs, money, food, shelter, transportation, alcohol, or anything else to in exchange for having sex with you. Please check the responses." and skip to B989.**

**If B989 is equal to B988, then skip to B992.**

B990. How many transgender partners were from Mexico? \_\_\_\_\_

9998 Refuse to Answer

**If B989 + B990 is greater than B988 and B989 is not equal to 9998 and B990 is not equal to 9998 then READ: "The participant's response should be less than or equal to the number of transgender whom you give drugs, money, food, shelter, transportation, alcohol, or anything else to in exchange for having sex with you. Please check the responses." and skip to B990.**

**If B989 + B990 is equal to B988, then skip to B992.**

B991. How many transgender partners were from other countries? \_ \_ \_ \_

9998 Refuse to Answer

**If B989 + B990 + B991 is greater than B988 and B989 is not equal to 9998 and B990 is not equal to 9998 and B991 is not equal to 9998 then READ: "The participant's response should be less than or equal to the number of transgender whom you give drugs, money, food, shelter, transportation, alcohol, or anything else to in exchange for having sex with you. Please check the responses." and skip to B991.**

B992. Has anyone EVER forced you to have sex with them using either physical force or emotional pressure?  
(Remember: By sex I mean anal, oral, or vaginal sex)

1 Yes

0 No

8 Refuse to Answer

**If B992 is not equal to 1, then skip to instruction before B1001.**

B993. How old were you the FIRST time someone forced you to have sex? \_ \_ \_ years old

98 Refuse to Answer

**If B993 is greater than A1 and B993 is not equal to 98 then READ: "Participant has responded with a length of time greater than his or her age. Please check the responses." and skip to B993.**

B994. For the first time, you were forced to have sex, who forced you to have sex with them?

**Interviewer: Read out the options and check all that apply** (Check all that apply)

- Family member
- Spouse
- Friend
- Acquaintance
- Stranger
- Other Sexual Partner
- Sex Trade Client
- Pimp
- Police/Authority
- Other
- Refuse to Answer

*If B994J is not equal to 1, then skip to instruction before B996.*

B995. Please, specify other

-----

*If B901 is not equal to 1, then skip to instruction before B1001.*

B996. In the **last 6 months**, has anyone ever forced you to have sex with them using either physical force or emotional pressure? (Remember: By sex I mean anal, oral, or vaginal sex)

- 1 Yes
- 0 No
- 8 Refuse to Answer

*If B996 is not equal to 1, then skip to instruction before B1001.*

B997. In what city were you forced to have sex in the last 6 months? (Check all that apply)

- San Diego County
- Tijuana
- Other city in the US
- Other city in Mexico
- Other
- Refuse to Answer

*If B997E is not equal to 1, then skip to B999.*

B998. Please, specify other

-----

B999. In the last 6 months, who forced you to have sex with them?  
**Interviewer: Read out the options and check all that apply** (Check all that apply)

- Family member
- Spouse
- Friend
- Acquaintance
- Stranger
- Other Sexual Partner
- Sex Trade Client
- Pimp
- Police/Authority
- Other
- Refuse to Answer

*If B999J is not equal to 1, then skip to instruction before B1001.*



*If B1004 is equal to B1003, then skip to end of questionnaire.*

B1005. Of these [Response to B1003] number of times, how many times did this happen in Mexico?

\_\_\_\_\_

9998 Refuse to Answer

*If B1004 + B1005 is greater than B1003 and B1004 is not equal to 9998 and B1005 is not equal to 9998 then READ: "The participant's response should be less than or equal to the number of times you had sex with a law enforcement officer to avoid arrest or other punishment. Please check the responses." and skip to B1005.*

**READ: END OF INTERVIEW.**

**INTERVIEWER READ TO THE RESPONDENT:** *That is the end of the questionnaire. Thank you very much for your valuable time and cooperation.*

*DISQ1 = If(A1 is less than 18 or A1 is equal to 998 or A3 is greater than 30 or A3 is equal to 9998 or A7 is equal to 3 or A7 is equal to 8, 1, 0)*

*DISQ2 = If(A7 is equal to 1 and (A8 is equal to 7 or A8 is equal to 8) or A7 is equal to 2 and A12 is not equal to 1, 1, 0)*

*DISQ3 = If(GROUP is equal to 0, 1, 0)*

*DISQALL = DISQ1 + DISQ2 + DISQ3*

*If DISQALL is greater than 0 then skip to end of questionnaire*

*If not, then skip to end of questionnaire.*

**READ: INTERVIEWER: PARTICIPANT IS NOT ELIGIBLE! END INTERVIEW.** *Thank them for their time.*

**READ: End of survey.**



**Proyecto La Frontera**

# Entrevista de Base

Descargo de responsabilidad: Esta entrevista ha sido adaptada para su programación en QDS y no ha sido adaptada para ser administrada con papel y lápiz

IP: Steffanie Strathdee  
10-18-2021

LaFrontera.Quant1.20210616 (Español)

**LEA: La Frontera**  
**Entrevista Cuantitativa (Base)**  
**Español**

**VERSION = 20210616**

Q1. Por favor ingresar la fecha de entrevista \_\_\_ / \_\_\_ / \_\_\_\_\_ dd / mm / aaaa

**If Q1 is greater than TODAY and TODAY is not equal to "Falta" then LEA: "Esa fecha ocurre en el futuro. Verificar respuesta." and siga con P Q1.**

Q2. Iniciales del entrevistador. \_\_\_\_\_

Q3. Numero de visita. (Escoja una) 1 Base/Visita 1

Q4. Ciudad de entrevista.  
**Entrevistador, ies crucial que ingrese correctamente el lugar de la entrevista!**  
(Escoja una) 1 San Diego  
2 Tijuana

**If Q4 is equal to 1 then siga con P Q5**

**If not, then siga con P instrucción antes de Q7.**

Q5. Lugar de entrevista. (Escoja una) 1 San Diego 1  
2 San Diego 2  
3 San Diego 3  
4 Centro de Rehabilitacion  
5 Cárcel  
6 Otro

**If Q5 is not equal to 6, then siga con P instrucción antes de Q7.**

Q6. Por favor especifica lugar de entrevista.

---

*If Q4 is equal to 2 then siga con P Q7*

*If not, then siga con P Q9.*

- Q7. Lugar de entrevista. (Escoja una)
- |   |                                |
|---|--------------------------------|
| 1 | Tijuana 1 Zona Norte - El Mapa |
| 2 | Tijuana 2 Oficina Coahuila     |
| 3 | Tijuana 3                      |
| 4 | Centro de Rehabilitacion       |
| 5 | Cárcel                         |
| 6 | Otro                           |

*If Q7 is not equal to 6, then siga con P Q9.*

Q8. Por favor especifica lugar de entrevista.

---

Q9. Entrevistador, ¿cómo se realizará esta entrevista? (Escoja una)

- |   |                                                |
|---|------------------------------------------------|
| 1 | En persona, adentro                            |
| 2 | En persona, afuera                             |
| 3 | Por video llamada (por ejemplo: Zoom o Skype)  |
| 4 | Por audio llamada (por ejemplo telefono, Zoom) |
| 5 | Otro                                           |
| 8 | Se rehúsa a contestar                          |

*If Q9 is not equal to 5, then siga con P Q11.*

Q10. Por favor especifique de qué otra manera.

-----

Q11. ID de Participante (e.g., LF001):

-----

*ID1 = SubString(Q11, 0, 1)*

*ID2 = SubString(Q11, 1, 1)*

*ID3 = SubString(Q11, 2, 1)*

*ID4 = SubString(Q11, 3, 1)*

*ID5 = SubString(Q11, 4, 1)*

*IDSTUDY = Concatenated(ID1, ID2)*

*If IDSTUDY is not equal to LF then LEA: "Verificar ID" and siga con P Q11.*

*If ID3 is not equal to 0 and ID3 is not equal to 1 and ID3 is not equal to 2 and ID3 is not equal to 3 and ID3 is not equal to 4 and ID3 is not equal to 5 and ID3 is not equal to 6 and ID3 is not equal to 7 and ID3 is not equal to 8 and ID3 is not equal to 9 or ID4 is not equal to 0 and ID4 is not equal to 1 and ID4 is not equal to 2 and ID4 is not equal to 3 and ID4 is not equal to 4 and ID4 is not equal to 5 and ID4 is not equal to 6 and ID4 is not equal to 7 and ID4 is not equal to 8 and ID4 is not equal to 9 or ID5 is not equal to 0 and ID5 is not equal to 1 and ID5 is not equal to 2 and ID5 is not equal to 3 and ID5 is not equal to 4 and ID5 is not equal to 5 and ID5 is not equal to 6 and ID5 is not equal to 7 and ID5 is not equal to 8 and ID5 is not equal to 9 then LEA: "Verificar ID" and siga con P Q11.*

Q12. Por favor ingresar ID de SCREENER del participante (ej. LF0001) **NOTA PARA ENTREVISTADOR: Por favor no confundir el número de screener con el ID de Participante.**

-----

*SCRID1 = SubString(Q12, 0, 1)*

*SCRID2 = SubString(Q12, 1, 1)*

*SCRID3 = SubString(Q12, 2, 1)*

*SCRID4 = SubString(Q12, 3, 1)*

*SCRID5 = SubString(Q12, 4, 1)*

*SCRID6 = SubString(Q12, 5, 1)*

*IDSCREEN = Concatenated(SCRID1, SCRID2)*

*If IDSCREEN is not equal to LF then LEA: "Verificar ID de SCREENER" and siga con P Q12.*

*If SCRID3 is not equal to 0 and SCRID3 is not equal to 1 and SCRID3 is not equal to 2 and SCRID3 is not equal to 3 and SCRID3 is not equal to 4 and SCRID3 is not equal to 5 and SCRID3 is not equal to 6 and SCRID3 is not equal to 7 and SCRID3 is not equal to 8 and SCRID3 is not equal to 9 or SCRID4 is not equal to 0 and SCRID4 is not equal to 1 and SCRID4 is not equal to 2 and SCRID4 is not equal to 3 and SCRID4 is not equal to 4 and SCRID4 is not equal to 5 and SCRID4 is not equal to 6 and SCRID4 is not equal to 7 and SCRID4 is not equal to 8 and SCRID4 is not equal to 9 or SCRID5 is not equal to 0 and SCRID5 is not equal to 1 and SCRID5 is not equal to 2 and SCRID5 is not equal to 3 and SCRID5 is not equal to 4 and SCRID5 is not equal to 5 and SCRID5 is not equal to 6 and SCRID5 is not equal to 7 and SCRID5 is not equal to 8 and SCRID5 is not equal to 9 or SCRID6 is not equal to 0 and SCRID6 is not equal to 1 and SCRID6 is not equal to 2 and SCRID6 is not equal to 3 and SCRID6 is not equal to 4 and SCRID6 is not equal to 5 and SCRID6 is not equal to 6 and SCRID6 is not equal to 7 and SCRID6 is not equal to 8 and SCRID6 is not equal to 9 then LEA: "Verificar ID de SCREENER" and siga con P Q11.*

Q13. ¿Qué lenguajes hablas, aun si no lo(s) hablas muy bien? **Entrevistador: Leer la lista en voz alta y escoger todas las que apliquen.** (Marque todas las que apliquen)

- Español
- Ingles
- Dialecto/Lenguaje indígena
- Otro
- Se rehúsa a contestar

*If Q13D is not equal to 1, then siga con P instrucción antes de Q15.*

Q14. Por favor especifica otro lenguaje. \_\_\_\_\_

*If Q13B is not equal to 1, then siga con P instrucción antes de Q17.*

Q15. ¿Qué tan bien **hablas** el inglés? (Escoja una)

|   |                       |
|---|-----------------------|
| 0 | Fluido/Lengua Materna |
| 1 | Muy bien              |
| 2 | OK                    |
| 3 | No muy bien           |
| 8 | Se rehúsa a contestar |

Q16. ¿Qué tan bien **lees/escribes** el inglés? (Escoja una)

|   |                       |
|---|-----------------------|
| 0 | Perfectamente         |
| 1 | Muy bien              |
| 2 | OK                    |
| 3 | No muy bien           |
| 4 | Para nada             |
| 8 | Se rehúsa a contestar |

*If Q13A is not equal to 1, then siga con P instrucción antes de A1.*

Q17. ¿Qué tan bien **hablas** el español? (Escoja una)

|   |                       |
|---|-----------------------|
| 0 | Fluido/Lengua Materna |
| 1 | Muy bien              |
| 2 | OK                    |
| 3 | No muy bien           |
| 8 | Se rehúsa a contestar |



A3. ¿Cuándo fue la última vez que se inyectó drogas? **Entrevistador marque HOY como 0 días**

\_\_\_\_\_

MESES

\_\_\_\_\_

DÍAS

9998

Se rehúsa a contestar (Días)

*If A3 is greater than 30 or A3 is equal to 9998, then siga con P final de la entrevista.*

A4. ¿Has estado inscrito anteriormente en cualquier proyecto de investigación como El Cuete, Mujer Segura, Mujer Mas Segura?

1

Si

0

No

8

Se rehúsa a contestar

*If A4 is not equal to 1, then siga con P instrucción antes de A6.*

A5. Si la respuesta es sí, ¿en qué estudio participaste? (Marque todas las que apliquen)

\_\_\_

El Cuete

\_\_\_

Mujer Saludable Siempre

\_\_\_

Proyecto EPICO

\_\_\_

Otro

\_\_\_

Se rehúsa a contestar

*If A5D is not equal to 1, then siga con P A7.*

A6. Por favor especifica en que proyecto participaste.

-----



- A7. ¿En qué país vives? (Escoja una)
- |   |                       |
|---|-----------------------|
| 1 | Estados Unidos        |
| 2 | México                |
| 3 | Otro                  |
| 8 | Se rehúsa a contestar |

***If A7 is equal to 3 or A7 is equal to 8, then siga con P final de la entrevista.***

***If A7 is equal to 1 then siga con P A8***

***If not, then siga con P instrucción antes de A12.***

- A8. ¿En qué región del condado de San Diego vives? (Escoja una)
- |   |                                                   |
|---|---------------------------------------------------|
| 1 | Ciudad de San Diego                               |
| 2 | Región este (East County)                         |
| 3 | Región norte de la costa (North County Coastal)   |
| 4 | Región norte tierra adentro (North County Inland) |
| 5 | Bahía del sur (South Bay)                         |
| 6 | Otra región de San Diego                          |
| 7 | No vivo en el condado de San Diego                |
| 8 | Se rehúsa a contestar                             |

***If A8 is not equal to 6, then siga con P instrucción antes de A10.***

- A9. Por favor especifica la región donde vives.
- 

***If A8 is equal to 7 or A8 is equal to 8, then siga con P final de la entrevista.***

- A10. ¿En qué ciudad/ área no incorporada vives? (Escoja una)
- |    |                       |
|----|-----------------------|
| 01 | Carlsbad              |
| 02 | Chula Vista           |
| 03 | Coronado              |
| 04 | Del Mar               |
| 05 | El Cajón              |
| 06 | Encinitas             |
| 07 | Escondido             |
| 08 | Imperial Beach        |
| 09 | La Mesa               |
| 10 | Lemon Grove           |
| 11 | National City         |
| 12 | Oceanside             |
| 13 | Poway                 |
| 14 | San Diego             |
| 15 | San Marcos            |
| 16 | Santee                |
| 17 | Solana Beach          |
| 18 | Vista                 |
| 19 | Otro                  |
| 98 | Se rehúsa a contestar |

***If A10 is not equal to 19, then siga con P instrucción antes de A12.***

A11. Por favor especifica la otra ciudad/ área no incorporada en la que vives.

---

*If A7 is equal to 2 then siga con P A12*

*If not, then siga con P instrucción antes de A14.*

- A12. ¿En qué ciudad vives? (Escoja una)
- |   |                       |
|---|-----------------------|
| 1 | Tijuana               |
| 2 | Mexicali              |
| 3 | Ensenada              |
| 4 | Rosarito              |
| 5 | Otro                  |
| 8 | Se rehúsa a contestar |

*If A12 is not equal to 5, then siga con P instrucción antes de A14.*

A13. Por favor especifica la otra ciudad en la que vives.

---

*If A12 is not equal to 1, then siga con P final de la entrevista.*

*If A7 is equal to 1 then siga con P instrucción antes de A14*

*If not, then siga con P instrucción antes de A19.*

*If Q4 is equal to 1 then siga con P A14*

*If not, then siga con P A16.*

- A14. ¿Alguna vez has estado en México?
- |   |                       |
|---|-----------------------|
| 1 | Si                    |
| 0 | No                    |
| 8 | Se rehúsa a contestar |

**If A14 is not equal to 1, then siga con P instrucción antes de A19.**

A15. ¿Cuándo fue la última vez que fue a México?

\_\_\_ / \_\_\_ / \_\_\_\_\_

dd / mm / aaaa

2098

Se rehúsa a contestar (Año)

**If A15 is less than A2 and A15 is not equal to 2098 then LEA: "Ha indicado que el participante visitó México antes de su fecha de nacimiento. Por favor verificar respuesta. " and siga con P A15.**

A16. ¿Alguna vez has usado alguna droga en México?

1

Si

0

No

8

Se rehúsa a contestar

**If A16 is not equal to 1, then siga con P instrucción antes de A19.**

A17. ¿Alguna vez te has inyectado alguna droga en México?

1

Si

0

No

8

Se rehúsa a contestar

**If A17 is not equal to 1, then siga con P instrucción antes de A19.**

A18. ¿Cuándo fue la última vez que te inyectaste alguna droga en México?

\_\_\_ / \_\_\_ / \_\_\_\_\_

dd / mm / aaaa

2098

Se rehúsa a contestar (Año)

**If A18 is less than A2 and A18 is not equal to 2098 then LEA: "Has indicado que el participante se inyectó drogas antes de su fecha de nacimiento. Por favor verificar respuesta. " and siga con P A18.**

**If Q4 is equal to 2 and A7 is equal to 2 then siga con P A19**

**If not, then siga con P instrucción antes de A24.**

- A19. ¿Alguna vez has estado en Estados Unidos?
- |   |                       |
|---|-----------------------|
| 1 | Si                    |
| 0 | No                    |
| 8 | Se rehúsa a contestar |

***If A19 is not equal to 1, then siga con P instrucción antes de A24.***

- A20. ¿Cuándo fue la última vez que Ud fue a los Estados Unidos?
- \_\_\_ / \_\_\_ / \_\_\_\_\_ dd / mm / aaaa
- 2098 Se rehúsa a contestar (Año)

***If A20 is less than A2 and A20 is not equal to 2098 then LEA: "Ha indicado que el participante visitó EUA antes de su fecha de nacimiento. Por favor verificar respuesta. " and siga con P A20.***

- A21. ¿Alguna vez has usado alguna droga en Estados Unidos?
- |   |                       |
|---|-----------------------|
| 1 | Si                    |
| 0 | No                    |
| 8 | Se rehúsa a contestar |

***If A21 is not equal to 1, then siga con P instrucción antes de A24.***

- A22. ¿Alguna vez te has inyectado alguna droga en Estados Unidos?
- |   |                       |
|---|-----------------------|
| 1 | Si                    |
| 0 | No                    |
| 8 | Se rehúsa a contestar |

***If A22 is not equal to 1, then siga con P instrucción antes de A24.***

- A23. ¿Cuándo fue la última vez que te inyectaste alguna droga en Estados Unidos?
- \_\_\_ / \_\_\_ / \_\_\_\_\_ dd / mm / aaaa
- 2098 Se rehúsa a contestar (Año)

**If A23 is less than A2 and A23 is not equal to 2098 then LEA: "Has indicado que el participante se inyectó drogas antes de su fecha de nacimiento. Por favor verificar respuesta. " and siga con P A23.**

**If A7 is equal to 1 or A12 is equal to 1 and A19 is equal to 1 then siga con P A24**

**If not, then siga con P instrucción antes de B1.**

|      |                                                         |   |                       |
|------|---------------------------------------------------------|---|-----------------------|
| A24. | ¿Eres ciudadano/a Americano/a o residente legal de EUA? | 1 | Si                    |
|      |                                                         | 0 | No                    |
|      |                                                         | 8 | Se rehúsa a contestar |

**LCOUNTRY = If(A7 is equal to 1, the US, If(A7 is equal to 2, Mexico, ))**

**LCITY = If(A8 is equal to 1 or A8 is equal to 2 or A8 is equal to 3 or A8 is equal to 4 or A8 is equal to 5 or A8 is equal to 6, San Diego County, If(A12 is equal to 1, Tijuana, ))**

**DT\_SD = If((A8 is equal to 1 or A8 is equal to 2 or A8 is equal to 3 or A8 is equal to 4 or A8 is equal to 5 or A8 is equal to 6) and A16 is equal to 1 and A17 is equal to 1 and A18 is not equal to 2098 and TODAY - A18 is less than 366, 1, 0)**

**NDT\_SD = If(Q4 is equal to 1 and (A8 is equal to 1 or A8 is equal to 2 or A8 is equal to 3 or A8 is equal to 4 or A8 is equal to 5 or A8 is equal to 6) and (A14 is equal to 0 or A14 is equal to 1 and TODAY - A15 is greater than 730), 1, 0)**

**NDT\_TJ = If(Q4 is equal to 2 and A12 is equal to 1 and (A19 is equal to 0 or A19 is equal to 1 and TODAY - A20 is greater than 730), 1, 0)**

**GROUP = If(DT\_SD is equal to 1, 1, If(NDT\_SD is equal to 1, 2, If(NDT\_TJ is equal to 1, 3, 0)))**

**If GROUP is equal to 0, then siga con P final de la entrevista.**

**LEA: ENTREVISTADOR LEER AL PARTICIPANTE: Ahora te voy a preguntar sobre tu vida y de dónde vienes.**

**If A7 is equal to 1 then siga con P B1**

**If not, then siga con P instrucción antes de B3.**



B7. ¿En qué estado naciste?

-----

*If 1 is equal to 1, then siga con P B15.*

B8. ¿En qué estado naciste? **ENTREVISTADOR: Por favor selecciona el botón que corresponde a la primera letra del nombre del estado de nacimiento y luego selecciona el nombre.** (Escoja una)

- |   |                       |
|---|-----------------------|
| 1 | A - M                 |
| 2 | N - Z                 |
| 8 | Se rehúsa a contestar |

*If B8 is not equal to 1, then siga con P instrucción antes de B10.*



B9. **ENTREVISTADOR: Por favor selecciona el nombre del estado de nacimiento del participante.** (Escoja una)

- |    |                           |
|----|---------------------------|
| 01 | Aguascalientes (Ags)      |
| 02 | Baja California (BC)      |
| 03 | Baja California Sur (BCS) |
| 04 | Chihuahua (Chih)          |
| 05 | Colima (Col)              |
| 06 | Campeche (Camp)           |
| 07 | Coahuila (Coah)           |
| 08 | Chiapas (Chis)            |
| 09 | Distrito Federal (DF)     |
| 10 | Durango (Dgo)             |
| 11 | Guerrero (Gro)            |
| 12 | Guanajuato (Gto)          |
| 13 | Hidalgo (Hgo)             |
| 14 | Jalisco (Jal)             |
| 15 | Michoacán (Mich)          |
| 16 | Morelos (Mor)             |
| 17 | México (Mex or Edomex)    |
| 98 | Se rehúsa a contestar     |

*If B8 is not equal to 2, then siga con P instrucción antes de B11.*

B10. **ENTREVISTADOR: Por favor selecciona el nombre del estado de nacimiento del participante.** (Escoja una)

- |    |                       |
|----|-----------------------|
| 01 | Nayarit (Nay)         |
| 02 | Nuevo León (NL)       |
| 03 | Oaxaca (Oax)          |
| 04 | Puebla (Pue)          |
| 05 | Quintana Roo (Q Roo)  |
| 06 | Querétaro (Qro.)      |
| 07 | Sinaloa (Sin)         |
| 08 | San Luis Potosí (SLP) |
| 09 | Sonora (Son)          |
| 10 | Tabasco (Tab)         |
| 11 | Tlaxcala (Tlax)       |
| 12 | Tamaulipas (Tamps)    |
| 13 | Veracruz (Ver)        |
| 14 | Yucatán (Yuc)         |
| 15 | Zacatecas (Zac)       |
| 98 | Se rehúsa a contestar |

*If 1 is equal to 1, then siga con P B15.*

B11. ¿En qué estado naciste? **ENTREVISTADOR: Por favor selecciona el botón que corresponde a la primera letra del nombre del estado de nacimiento y luego selecciona el nombre.** (Escoja una)

- |   |                       |
|---|-----------------------|
| 1 | A - I                 |
| 2 | K - R                 |
| 3 | S - Z                 |
| 8 | Se rehúsa a contestar |

*If B11 is not equal to 1, then siga con P instrucción antes de B13.*

B12. **ENTREVISTADOR: Por favor selecciona el nombre del estado de nacimiento del participante.** (Escoja una)

- |    |                       |
|----|-----------------------|
| 01 | ALABAMA               |
| 02 | ALASKA                |
| 03 | ARIZONA               |
| 04 | ARKANSAS              |
| 05 | CALIFORNIA            |
| 06 | COLORADO              |
| 07 | CONNECTICUT           |
| 08 | DELAWARE              |
| 09 | FLORIDA               |
| 10 | GEORGIA               |
| 11 | HAWAII                |
| 12 | IDAHO                 |
| 13 | ILLINOIS              |
| 14 | INDIANA               |
| 15 | IOWA                  |
| 98 | Se rehúsa a contestar |

*If B11 is not equal to 2, then siga con P instrucción antes de B14.*

B13. **ENTREVISTADOR: Por favor selecciona el nombre del estado de nacimiento del participante.** (Escoja una)

- 01 KANSAS
- 02 KENTUCKY
- 03 LOUISIANA
- 04 MAINE
- 05 MARYLAND
- 06 MASSACHUSETTS
- 07 MICHIGAN
- 08 MINNESOTA
- 09 MISSISSIPPI
- 10 MISSOURI
- 11 MONTANA
- 12 NEBRASKA
- 13 NEVADA
- 14 NEW HAMPSHIRE
- 15 NEW JERSEY
- 16 NEW MEXICO
- 17 NEW YORK
- 18 NORTH CAROLINA
- 19 NORTH DAKOTA
- 20 OHIO

- 21 OKLAHOMA
- 22 OREGON
- 23 PENNSYLVANIA
- 24 RHODE ISLAND
- 98 Se rehúsa a contestar

*If B11 is not equal to 3, then siga con P B15.*

**B14. ENTREVISTADOR: Por favor selecciona el nombre del estado de nacimiento del participante. (Escoja una)**

- 01 SOUTH CAROLINA
- 02 SOUTH DAKOTA
- 03 TENNESSEE
- 04 TEXAS
- 05 UTAH
- 06 VERMONT
- 07 VIRGINIA
- 08 WASHINGTON STATE
- 09 Washington DC
- 10 WEST VIRGINIA
- 11 WISCONSIN
- 12 WYOMING
- 98 Se rehúsa a contestar

B15. Por favor dime en que ciudad naciste.

-----

B16. ¿Qué tipo de identificación tienes? (Marque todas las que apliquen)

- Acta de nacimiento de Estados Unidos
- Acta de nacimiento de México
- Pasaporte
- Pase Sentri
- Pase Global entry
- Pase Ready lane
- Visa de Turista Estados Unidos
- Visa de Trabajo Estados Unidos
- Credencial de elector (INE) ID Mexicana
- Licencia de conducir Estados Unidos
- Otro documento para cruce de frontera
- Ninguna de las anteriores
- Otro (especifica)
- Se rehúsa a contestar

***If B16M is equal to 1 and B16A + B16B + B16C + B16D + B16E + B16F + B16G + B16H + B16I + B16J + B16K + B16L is greater than 0 then LEA: "Solo puedes escoger "ninguno" por si solo. Verificar respuesta." and siga con P B16.***

***If B16L is not equal to 1, then siga con P instrucción antes de B18.***

B17. Por favor, especifica el otro documento

-----

*If B16C is not equal to 1, then siga con P instrucción antes de B20.*

B18. ¿Qué tipo de pasaportes tienes? **Entrevistador: cualquier tipo de pasaporte está bien, aun si es ilegal** (Escoja una)

- 1 Mexicano
- 2 Estados Unidos
- 3 Los dos
- 4 No tengo pasaporte
- 5 Otro (especifica)
- 8 Se rehúsa a contestar

*If B18 is not equal to 5, then siga con P instrucción antes de B20.*

B19. Por favor, especifica otro pasaporte

-----

*If B5 is not equal to 1 and (B18 is equal to 2 or B18 is equal to 3) then siga con P B20*

*If not, then siga con P B21.*

B20. ¿Cuándo te volviste ciudadano americano? Por favor ingresar fecha de naturalización

\_\_\_ / \_\_\_ / \_\_\_\_\_ dd / mm / aaaa

2098 Se rehúsa a contestar (Año)

*If B20 is less than A2 and B20 is not equal to "Salto" and B20 is not equal to 2098 then LEA: "El participante ha respondido con un período de tiempo mayor que su edad. Por favor revise las respuestas." and siga con P B20.*



- B21. ¿Te consideras hispano/latino/mexicano?
- |   |                       |
|---|-----------------------|
| 1 | Si                    |
| 0 | No                    |
| 8 | Se rehúsa a contestar |

B22. ¿A qué grupo o grupos raciales consideras tu que perteneces? **Entrevistador: Lea la lista y marque todas las respuestas que apliquen.** (Marque todas las que apliquen)

- Blanco
- Afroamericano
- Asiático
- Nativo Hawaiiano u otro isleño del pacifico
- Indígena/ Indio Americano / Nativo de Alaska
- Raza mixta
- Otro
- Se rehúsa a contestar

*If B22G is not equal to 1, then siga con P B24.*

B23. Por favor especifica otro grupo racial:

-----

B24. Entrevistador: Si es necesario, preguntar: ¿Cuál consideras tú que es tu género? (Escoja una)

- 1 Hombre
- 2 Mujer
- 3 Mujer transgenero o trasfemenina
- 4 Hombre transgenero o transmasculino
- 5 Nobinario
- 6 Otro
- 8 Se rehúsa a contestar

*If B24 is not equal to 6, then siga con P B26.*

B25. Por favor especifica otro género con que identificas como el tuyo.

-----

B26. ¿Qué sexo esta listado en tu acta de nacimiento? (Escoja una)

- 1 Hombre
- 2 Mujer
- 3 Intersexual
- 8 Se rehúsa a contestar

- B27. ¿Cuál es su estado civil? (Escoja una)
- |   |                             |
|---|-----------------------------|
| 0 | Soltero/ nunca se ha casado |
| 1 | Casado / unión libre        |
| 2 | Divorciado                  |
| 3 | Separado                    |
| 4 | Viudo                       |
| 8 | Se rehúsa a contestar       |

- B28. ¿Cuál es el nivel más alto de educación que completaste? (Escoja una)

- |    |                              |
|----|------------------------------|
| 00 | Ninguno, no educación formal |
| 01 | Primaria incompleta          |
| 02 | Primaria completa            |
| 03 | Secundaria incompleta        |
| 04 | Secundaria completa          |
| 05 | Preparatoria incompleta      |
| 06 | Preparatoria completa        |
| 07 | Escuela Técnica              |
| 08 | Universidad/Colegio          |
| 09 | Otro                         |
| 98 | Se rehúsa a contestar        |

***If B28 is not equal to 9, then siga con P instrucción antes de B30.***

- B29. Por favor especifica otro nivel de educación completado.
-

*If B28 is equal to 0 or B28 is equal to 98, then siga con P instrucción antes de B31.*

B30. En total, ¿Cuántos años de educación has completado?

**ENTREVISTADOR: Si participante dice, No sé, preguntarle por un aproximado**

— — años

98 Se rehúsa a contestar

*If B30 is greater than A1 and B30 is not equal to 98 then LEA: "El participante contesto una cantidad mayor a su edad, verificar respuesta." and siga con P B30.*

B31. En los últimos 6 meses, dígame si ha vivido o dormido en alguno de los siguientes lugares. **(Entrevistador: Lea la lista y marque todas las respuestas que apliquen.)** (Marque todas las que apliquen)

- Casa o departamento de sus padres
- Su casa o departamento
- Casa de su esposo (a)/pareja sexual o departamento
- Casa o departamento de su Familia
- Casa o departamento de un amigo(a)
- En un campamento migrante
- Asilo, residencia de beneficencia, albergue
- Albergue, residencia de bienestar
- Lugar de trabajo
- Cuarto de renta (en un hotel o casa de huéspedes)
- Carro, Autobús, camión, u otro vehículo
- Edificio abandonado
- En un campamento/albergue para deportados
- Institución Correccional (cárcel, Centro de detención de menores, etc.)
- Centro de rehabilitación para el uso de drogas
- En las calles
- Picadero
- Instalaciones de servicios médicos (ej., hospital, hospicio, o asilo)
- Otro
- Se rehúsa a contestar

***If B31S is not equal to 1, then siga con P instrucción antes de B33.***

B32. Por favor especifica el otro lugar donde has dormido o vivido en los últimos 6 meses.

-----

***If B31A + B31B + B31C + B31D + B31E + B31F + B31G + B31H + B31I + B31J + B31K + B31L + B31M + B31N + B31O + B31P + B31Q + B31R + B31S is equal to 1 or B31 is equal to 98, then siga con P B35.***

B33. En los últimos 6 meses, ¿en qué lugar durmió la mayor parte del tiempo? (Escoja una)

- 01 Casa o departamento de sus padres
- 02 Su casa o departamento
- 03 Casa de su esposo (a)/pareja sexual o departamento
- 04 Casa o departamento de su Familia
- 05 Casa o departamento de un amigo(a)
- 06 En un campamento migrante
- 07 Asilo, residencia de beneficencia, albergue
- 08 Albergue, residencia de bienestar
- 09 Lugar de trabajo
- 10 Cuarto de renta (en un hotel o casa de huéspedes)
- 11 Carro, Autobús, camión, u otro vehículo
- 12 Edificio abandonado
- 13 En un campamento/albergue para deportados
- 14 Institución Correccional (cárcel, Centro de detención de menores, etc.)
- 15 Centro de rehabilitación para el uso de drogas
- 16 En las calles
- 17 Picadero
- 18 Instalaciones de servicios médicos (ej., hospital, hospicio, o asilo)
- 19 Otro
- 98 Se rehúsa a contestar

***If B33 is equal to 1 and B31A is not equal to 1 or B33 is equal to 2 and B31B is not equal to 1 or B33 is equal to 3 and B31C is not equal to 1 or B33 is equal to 4 and B31D is not equal to 1 or B33 is equal to 5 and B31E is not equal to 1 or B33 is equal to 6 and B31F is not equal to 1 or B33 is equal to 7 and B31G is not equal to 1 or B33 is equal to 8 and B31H is not equal to 1 or B33 is equal to 9 and B31I is not equal to 1 or B33 is equal to 10 and B31J is not equal to 1 or B33 is equal to 11 and B31K is not equal to 1 or B33 is equal to 12 and B31L is not equal to 1 or B33 is equal to 13 and B31M is not equal to 1 or B33 is equal to 14 and B31N is not equal to 1 or B33 is equal to 15 and B31O is not equal to 1 or B33 is equal to 16 and B31P is not equal to 1 or B33 is equal to 17 and B31Q is not equal to 1 or B33 is equal to 18 and B31R is not equal to 1 or B33 is equal to 19 and B31S is not equal to 1 then LEA: "El participante solo puede elegir el lugar con más frecuencia de entre los lugares nombrados anteriormente." and siga con P B33.***

***If B33 is not equal to 19, then siga con P B35.***

B34. Por favor, especifique el lugar donde dormía la mayor parte de su tiempo en los últimos 6 meses.

-----

B35. ¿Ha sido afectada su situación de vivienda por la pandemia de COVID / coronavirus que comenzó en Marzo de 2020? (Escoja una)

- 1 Si
- 2 No
- 3 No estoy seguro-a
- 8 Se rehúsa a contestar

***If B35 is not equal to 1, then siga con P B37.***

B36. ¿Su situación de vivienda es mejor o peor desde que comenzó COVID? (Escoja una)

- 1 Peor
- 2 Mejor
- 8 Se rehúsa a contestar
- 9 No corresponde



B37. Aproximadamente, ¿cuántas personas (incluyendo a usted) viven actualmente en su casa o, si no tiene hogar, en el lugar donde se queda la mayor parte de su tiempo? **Entrevistador: Si el participante vive solo, entre 1.**

— — — Personas  
998 Se rehúsa a contestar

B38. En los últimos 6 meses, en un día común, ¿cuántas horas pasa en la calle? Esto incluye buscando o vendiendo drogas, u otras formas de ganar dinero, consumiendo drogas y durmiendo en la calle.

— — horas al día  
98 Se rehúsa a contestar

*If B16A is equal to 1 or B16J is equal to 1 or B18 is equal to 2 or B18 is equal to 3 or A24 is equal to 1 then siga con P B39*

*If not, then siga con P instrucción antes de B41.*

B39. ¿Alguna vez fuiste miembro de la militar de Estados Unidos? 1 Si  
0 No  
8 Se rehúsa a contestar

*If B39 is not equal to 1, then siga con P instrucción antes de B41.*

B40. ¿Cuándo dejaste la militar? — — AÑOS  
— — MESES  
98 Se rehúsa a contestar (Años)

*If B40 is greater than A1 and B40 is not equal to 98 then LEA: "El participante ha respondido con un período de tiempo mayor que su edad. Por favor revise las respuestas." and siga con P B40.*

B41. En los últimos 6 meses, ¿Cuáles han sido tus fuentes de ingreso? **Entrevistador: Decir recuerda que tus respuestas son confidenciales. Lee la lista y escoja todas las que apliquen.** (Marque todas las que apliquen)

- Un empleo legal con salario
- Un empleo informal, trabajo eventual
- Militar
- Encargado de un picadero
- Vendiendo drogas
- Prostitución/Trabajo sexual
- Trabajo sexual (padrote)
- Otras fuentes ilegales
- Parientes/Amigos(as)
- Otro
- Ninguno
- Se rehúsa a contestar

***If B41K is equal to 1 and B41A + B41B + B41C + B41D + B41E + B41F + B41G + B41H + B41I + B41J is greater than 0 then LEA: "Solo puedes escoger la opcion "ninguno" por si sola, verificar respuesta." and siga con P B41.***

***If B41H is not equal to 1, then siga con P instrucción antes de B43.***

B42. Por favor especifique otra fuente de ingresos ilegal:

-----

***If B41J is not equal to 1, then siga con P instrucción antes de B44.***

B43. Por favor especifique otra fuente de ingresos:

-----

***If B41A + B41B + B41C + B41D + B41E + B41F + B41G + B41H + B41I + B41J + B41K is equal to 1 or B41 is equal to 98, then siga con P B47.***

B44. En el ultimo año, ¿Cuál ha sido tu principal fuente de ingreso? (Escoja una)

- |    |                                      |
|----|--------------------------------------|
| 01 | Un empleo legal con salario          |
| 02 | Un empleo informal, trabajo eventual |
| 03 | Militar                              |
| 04 | Vendiendo drogas                     |
| 05 | Encargado de un picadero             |
| 06 | Prostitución/Trabajo sexual          |
| 07 | Trabajo sexual (padrote)             |
| 08 | Otras fuentes ilegales               |
| 09 | Parientes/Amigos(as)                 |
| 10 | Otro                                 |
| 11 | Ninguno                              |
| 98 | Se rehúsa a contestar                |

***If B44 is equal to 1 and B41A is not equal to 1 or B44 is equal to 2 and B41B is not equal to 1 or B44 is equal to 3 and B41C is not equal to 1 or B44 is equal to 4 and B41E is not equal to 1 or B44 is equal to 5 and B41D is not equal to 1 or B44 is equal to 6 and B41F is not equal to 1 or B44 is equal to 7 and B41G is not equal to 1 or B44 is equal to 8 and B41H is not equal to 1 or B44 is equal to 9 and B41I is not equal to 1 or B44 is equal to 10 and B41J is not equal to 1 or B44 is equal to 11 and B41K is not equal to 1 then LEA: "El participante solo puede elegir la principal fuente de ingresos entre las fuentes mencionadas anteriormente." and siga con P B44.***

***If B44 is not equal to 8, then siga con P instrucción antes de B46.***

B45. Por favor especifique otra fuente ilegal de ingresos:

-----

*If B44 is not equal to 10, then siga con P B47.*

B46. Por favor especifique otra fuente de ingresos:

-----

B47. Por favor, especifica el tipo de moneda en el que recibes tus ingresos. (Escoja una)

- |   |                       |
|---|-----------------------|
| 1 | Pesos                 |
| 2 | Dólares               |
| 8 | Se rehúsa a contestar |

*If B47 is not equal to 1, then siga con P instrucción antes de B49.*

B48. ¿Cuál fue su ingreso mensual promedio durante el **año pasado**, antes de pagar impuestos, incluyendo ingresos legales e ilegales? (Escoja una)

- |   |                       |
|---|-----------------------|
| 0 | Nada                  |
| 1 | Menos de \$1000 pesos |
| 2 | \$1000 - \$1499 pesos |
| 3 | \$1500 - \$1999 pesos |
| 4 | \$2000 - \$2499 pesos |
| 5 | \$2500 - \$2999 pesos |
| 6 | \$3000 - \$3499 pesos |
| 7 | Más de \$3500 pesos   |
| 8 | Se rehúsa a contestar |

*If B47 is not equal to 2, then siga con P B50.*

B49. ¿Cuál fue su ingreso mensual promedio durante el **año pasado**, antes de pagar impuestos, incluyendo ingresos legales e ilegales? (Escoja una)

- |    |                        |
|----|------------------------|
| 00 | Nada                   |
| 01 | Menos de \$500 dólares |
| 02 | \$500-\$999 dólares    |
| 03 | \$1000-\$1499 dólares  |
| 04 | \$1500-\$1999 dólares  |
| 05 | \$2000-\$2499 dólares  |
| 06 | \$2500-\$2999 dólares  |
| 07 | \$3000-\$3499 dólares  |
| 08 | Más de \$3500 dólares  |
| 98 | Se rehúsa a contestar  |

B50. ¿Su nivel de ingresos se ha visto afectado por la pandemia de COVID / coronavirus que comenzó en Marzo de 2020? (Escoja una)

- |   |                       |
|---|-----------------------|
| 1 | Si                    |
| 2 | No                    |
| 3 | No estoy seguro-a     |
| 8 | Se rehúsa a contestar |

*If B50 is not equal to 1, then siga con P instrucción antes de B52.*

B51. ¿Su nivel de ingresos es mejor o peor desde que comenzó COVID? (Escoja una)

- 1 Peor
- 2 Mejor
- 8 Se rehúsa a contestar
- 9 No corresponde

**LEA: LEER: Te voy a preguntar sobre la ubicación de dónde vives, trabajas y te inyectas. Estas preguntas tienen como propósito ayudar a planificar ubicaciones de servicios de salud. Esta información no será ligada a ninguna información personal tuya, como tu nombre.**

**ENTREVISTADOR - TEN EL SAN DIEGO THOMAS BOOK O T MAPS PARA TIJUANA LISTOS Y DISPONIBLES PARA MOSTRAR AL PARTICIPANTE Y JUNTOS IDENTIFICAR EL BARRIO/LA COLONIA**

B52. ¿Cuál es el nombre de la colonia/vecindad donde vives actualmente?

-----

B53. ¿Cuál es el nombre de la colonia donde trabajas/ganas dinero **más seguido**?

-----

B54. En los últimos 6 meses, ¿en qué colonia compraste u obtuviste drogas **más seguido**?

-----

B55. En los últimos 6 meses, ¿en qué colonia te inyectaste drogas **más seguido**?

-----

**LEA: ENTREVISTADOR: Ahora te voy a preguntar sobre algunos de los lugares donde has vivido.**

**If A7 is equal to 2 then siga con P B56**

**If not, then siga con P instrucción antes de B60.**

- B56. ¿Has vivido en Tijuana toda tu vida?
- |   |                       |
|---|-----------------------|
| 1 | Si                    |
| 0 | No                    |
| 8 | Se rehúsa a contestar |

*If B56 is equal to 1, then siga con P instrucción antes de B60.*

- B57. ¿Cuánto tiempo llevas de vivir en Tijuana ?
- |     |                              |
|-----|------------------------------|
| ___ | AÑOS                         |
| ___ | MESES                        |
| ___ | SEMANAS                      |
| 98  | Se rehúsa a contestar (Años) |

*If B57 is greater than A1 and B57 is not equal to 98 then LEA: "El participante ha respondido con un período de tiempo mayor que su edad. Por favor revise las respuestas." and siga con P B57.*

- B58. ¿Cuál fue la razón principal por la cual te moviste a Tijuana? (Escoja una)
- |   |                                    |
|---|------------------------------------|
| 0 | Buscando trabajo/ una vida mejor   |
| 1 | Mi familia se vino a vivir aquí    |
| 2 | Transferido/Reubicación de trabajo |
| 3 | Para estar cerca de un familiar    |
| 4 | Fui deportado/a a Tijuana          |
| 5 | Otro                               |
| 8 | Se rehúsa a contestar              |

*If B58 is not equal to 5, then siga con P instrucción antes de B60.*

- B59. Por favor especifica la razón por la cual te moviste a Tijuana.
-

**If A7 is equal to 1 then siga con P B60**

**If not, then siga con P instrucción antes de B64.**

- B60. ¿Has vivido en San Diego toda tu vida?
- |   |                       |
|---|-----------------------|
| 1 | Si                    |
| 0 | No                    |
| 8 | Se rehúsa a contestar |

**If B60 is equal to 1, then siga con P instrucción antes de B64.**

- B61. ¿Cuánto tiempo llevas de vivir en San Diego?
- |       |                              |
|-------|------------------------------|
| __ __ | AÑOS                         |
| __ __ | MESES                        |
| __ __ | SEMANAS                      |
| 98    | Se rehúsa a contestar (Años) |

**If B61 is greater than A1 and B61 is not equal to 98 then LEA: "El participante ha respondido con un período de tiempo mayor que su edad. Por favor revise las respuestas." and siga con P B61.**

B62. ¿Cuál fue la razón principal por la cual te moviste a San Diego? (Escoja una)

- |   |                                               |
|---|-----------------------------------------------|
| 0 | Buscando trabajo/ una vida mejor en San Diego |
| 1 | Mi familia se vino a vivir aquí               |
| 2 | Transferido/Reubicación de trabajo            |
| 3 | Para estar cerca de un familiar               |
| 4 | Otro                                          |
| 8 | Se rehúsa a contestar                         |

**If B62 is not equal to 4, then siga con P instrucción antes de B64.**



B63. Por favor especifica la razón por la cual te moviste a San Diego.

-----

**USO DE DROGAS**

**LEA: LEER: Ahora te voy a preguntar algunas preguntas sobre tu uso de alcohol y drogas. Algunas de estas preguntas te van a pedir detalles que pueden ser difíciles de recordar. Por favor haz lo mejor que puedas para dar una respuesta aun si no es el mejor estimado. Recuerda que nosotros no compartiremos tus respuestas con la policía o con cualquier otra persona fuera de este estudio.**

B64. ¿Con qué frecuencia consume alguna bebida alcohólica? (Escoja una)

- |   |                          |
|---|--------------------------|
| 0 | Nunca                    |
| 1 | Mensualmente o menos     |
| 2 | 2-4 veces al mes         |
| 3 | 2-3 veces por semana     |
| 4 | 4 o más veces por semana |
| 8 | Se rehúsa a contestar    |

***If B64 is equal to 0 or B64 is equal to 8, then siga con P B68.***

B65. ¿Cuántos tragos de bebidas alcohólicas suele tomar en un día típico? (Escoja una)

- |   |                       |
|---|-----------------------|
| 1 | 1 to 2                |
| 2 | 3 to 4                |
| 3 | 5 to 6                |
| 4 | 7 to 9                |
| 5 | 10 o mas              |
| 8 | Se rehúsa a contestar |

***If B26 is equal to 2 or B26 is equal to 3 then siga con P B66***

***If not, then siga con P instrucción antes de B67.***

B66. Que tan seguido tomas 6 o mas bebidas (alcoholicas)regulares en una sola ocasion (vez)?  
(Escoja una)

- |   |                          |
|---|--------------------------|
| 0 | Nunca                    |
| 1 | Menos de una vez al mes  |
| 2 | Mensualmente             |
| 3 | Semanalmente             |
| 4 | A diario o casi a diario |
| 8 | Se rehúsa a contestar    |

*If B26 is equal to 1 then siga con P B67*

*If not, then siga con P B68.*

B67. Que tan seguido tomas 8 o mas bebidas (alcoholicas)regulares en una sola ocasion (vez)?  
(Escoja una)

- |   |                          |
|---|--------------------------|
| 0 | Nunca                    |
| 1 | Menos de una vez al mes  |
| 2 | Mensualmente             |
| 3 | Semanalmente             |
| 4 | A diario o casi a diario |
| 8 | Se rehúsa a contestar    |

B68. ¿Alguna vez fumaste cigarrillos?

- |   |                       |
|---|-----------------------|
| 1 | Si                    |
| 0 | No                    |
| 8 | Se rehúsa a contestar |

*If B68 is not equal to 1, then siga con P B73.*

B69. Actualmente ¿fumas cigarrros, aunque una fumada?

- |   |                       |
|---|-----------------------|
| 1 | Si                    |
| 0 | No                    |
| 8 | Se rehúsa a contestar |

*If B69 is equal to 0 then siga con P B70*

*If not, then siga con P B71.*

B70. ¿Más o menos cuanto hace que fumabas cigarros? **Entrevistador: Ingresar 0 si la respuesta es Menos de un año.**

\_\_\_ \_\_ AÑOS  
 98 Se rehúsa a contestar (Años)

*If B70 is greater than A1 and B70 is not equal to 98 then LEA: "Esa respuesta excede la edad del participante. Por favor verificar respuesta." and siga con P B70.*

B71. ¿Qué edad tenías cuando comenzaste a fumar cigarros? \_\_\_ \_\_

98 Se rehúsa a contestar

*If B71 is greater than A1 and B71 is not equal to 98 then LEA: "Esa respuesta excede la edad del participante. Por favor verificar respuesta." and siga con P B71.*

*If B69 is equal to 1 then siga con P B72*

*If not, then siga con P B73.*

B72. ¿Cuantos cigarros fuma por día? **Entrevistador: Hay 20 cigaros en un paquete.**

\_\_\_ \_\_\_ \_\_ cigarros por día  
 998 Se rehúsa a contestar

B73. ¿Qué edad tenías la primera vez que usaste una droga ilegal?

\_\_\_ \_\_ años de edad  
 98 Se rehúsa a contestar

*If B73 is greater than A1 then LEA: "Esa respuesta excede la edad del participante. Por favor verificar respuesta." and siga con P B73.*

B74. ¿Qué droga consumiste la primera vez que usaste droga? (Marque todas las que apliquen)

- Heroína en goma/Goma negra (la negra) sola
- Heroína en polvo sola
- Cocaína (en polvo) sola
- Heroína y cocaína juntas (speedball)
- Metanfetamina/cristal
- Crack sola
- China White sola
- OxyContin, sin receta
- Otro opioide/sustancia controlada sin receta (Vicodin, Darvon, Percocet)
- Tranquilizantes (Rivotril, Diazepam, Valium, Ativan o Restoril)
- Barbituricos sin receta (Amytal, Nembutal, o Seconal)
- Fentanilo (Fentanyl)
- Otra droga o combinación de drogas no mencionada anteriormente
- Se rehúsa a contestar

***If B74M is not equal to 1, then siga con P B76.***

B75. Por favor especifica otra droga o combinación:

-----

B76. ¿Qué edad tenías la primera vez que te inyectaste drogas? \_\_ \_\_ años de edad

98 Se rehúsa a contestar

***If B76 is less than B73 and B73 is not equal to 98 or B76 is greater than A1 and B76 is not equal to 98 then LEA: "La respuesta es menor que la edad en que el participante usó drogas por primera vez o supera la edad del participante. Por favor revise la respuesta." and siga con P B76.***

B77. ¿Qué droga o combinación de drogas te inyectaste la primera vez que te inyectaste? (Marque todas las que apliquen)

- Heroína en goma/Goma negra (la negra) sola
- Heroína en polvo sola
- Cocaína (en polvo) sola
- Heroína y cocaína juntas (speedball)
- Metanfetamina/cristal
- Crack sola
- China White sola
- OxyContin, sin receta
- Otro opioide/sustancia controlada sin receta (Vicodin, Darvon, Percocet)
- Tranquilizantes (Rivotril, Diazepam, Valium, Ativan o Restoril)
- Barbituricos sin receta (Amytal, Nembutal, o Seconal)
- Fentanilo (Fentanyl)
- Otra droga o combinación de drogas no mencionada anteriormente
- Se rehúsa a contestar

***If B77M is not equal to 1, then siga con P B79.***

B78. Por favor especifica otra droga o combinación:

-----

B79. ¿Con quién te inyectaste la primera vez que inyectaste? (Marque todas las que apliquen)

- Nadie (solo)
- Amigo/a
- Esposo/a
- Pareja
- Hermano
- Hermana
- Primo/a
- Tía
- Tío
- Pareja sexual que no es esposo/a
- Conocido
- Desconocido
- Otro
- Se rehúsa a contestar

***If B79A is equal to 1 and B79B + B79C + B79D + B79E + B79F + B79G + B79H + B79I + B79J + B79K + B79L + B79M is greater than 0 then LEA: "Solo puedes escoger la respuesta "Nadie (solo)" por si sola." and siga con P B79.***

***If B79M is not equal to 1, then siga con P instrucción antes de B81.***

B80. Por favor especifica otra persona con la que te inyectaste la primera vez:

-----

***LEA: LEER: Ahora, te voy a preguntar sobre diferentes drogas que hayas usado en [LCOUNTRY]. Por favor dime si alguna vez has usado cualquiera de estas drogas en los últimos 6 meses. Si estuviste en prisión/cárcel en los últimos 6 meses por favor piensa en la ocasión cuando estuviste fuera de prisión/cárcel para responder estas preguntas.***

B81. ¿Alguna vez has fumado o vapeado marihuana o hachís por si sola en el condado de [LCOUNTRY]?

- |   |                       |
|---|-----------------------|
| 1 | Si                    |
| 0 | No                    |
| 8 | Se rehúsa a contestar |

*If B81 is not equal to 1, then siga con P B86.*

B82. ¿Qué edad tenías la primera vez que fumaste o vapeaste marihuana o hachís por si sola?

- |     |                       |
|-----|-----------------------|
| — — | años de edad          |
| 98  | Se rehúsa a contestar |

*If B82 is less than B73 or B82 is greater than A1 and B82 is not equal to 98 then LEA: "La respuesta es menor que la edad en que el participante usó drogas por primera vez o supera la edad del participante. Por favor revise la respuesta." and siga con P B82.*

B83. En los últimos 6 meses, en promedio ¿qué tan seguido fumaste marihuana o hachís por sola mientras estabas en [LCOUNTRY]? (Escoja una)

- |    |                       |
|----|-----------------------|
| 00 | Nunca                 |
| 01 | 1 vez al mes o menos  |
| 02 | 2-3 días al mes       |
| 03 | Una vez a la semana   |
| 04 | 2-3 días a la semana  |
| 05 | 4-6 días a la semana  |
| 06 | Una vez al día        |
| 07 | 2-3 veces al día      |
| 08 | 4 veces o mas por día |
| 98 | Se rehúsa a contestar |



- B84. ¿Alguna vez has vapeado marihuana o hachís por si sola?
- |   |                       |
|---|-----------------------|
| 1 | Si                    |
| 0 | No                    |
| 8 | Se rehúsa a contestar |

*If B84 is not equal to 1, then siga con P B86.*

- B85. En los últimos 6 meses, en promedio ¿qué tan seguido vapeaste marihuana o hachís por sola mientras estabas en el condado de [LCOUNTRY]? (Escoja una)

- |    |                       |
|----|-----------------------|
| 00 | Nunca                 |
| 01 | 1 vez al mes o menos  |
| 02 | 2-3 días al mes       |
| 03 | Una vez a la semana   |
| 04 | 2-3 días a la semana  |
| 05 | 4-6 días a la semana  |
| 06 | Una vez al día        |
| 07 | 2-3 veces al día      |
| 08 | 4 veces o mas por día |
| 98 | Se rehúsa a contestar |

- B86. ¿Alguna vez has usado heroína?
- |   |                       |
|---|-----------------------|
| 1 | Si                    |
| 0 | No                    |
| 8 | Se rehúsa a contestar |

*If B86 is not equal to 1, then siga con P B100.*

- B87. ¿Alguna vez has fumado, aspirado o inhalado heroína?
- |   |                       |
|---|-----------------------|
| 1 | Si                    |
| 0 | No                    |
| 8 | Se rehúsa a contestar |

*If B87 is not equal to 1, then siga con P B90.*

B88. ¿Qué edad tenías la primera vez que fumaste, aspiraste o inhalaste heroína?

— — años de edad  
98 Se rehúsa a contestar

***If B88 is less than B73 or B88 is greater than A1 and B88 is not equal to 98 then LEA: "La respuesta es menor que la edad en que el participante usó drogas por primera vez o supera la edad del participante. Por favor revise la respuesta." and siga con P B88.***

B89. En los últimos 6 meses, en promedio ¿qué tan seguido fumaste, aspiraste o inhalaste heroína mientras estabas en [LCOUNTRY]? (Escoja una)

00 Nunca  
01 1 vez al mes o menos  
02 2-3 días al mes  
03 Una vez a la semana  
04 2-3 días a la semana  
05 4-6 días a la semana  
06 Una vez al día  
07 2-3 veces al día  
08 4 veces o mas por día  
98 Se rehúsa a contestar

B90. ¿Alguna vez te has inyectado heroína sola?

1 Si  
0 No  
8 Se rehúsa a contestar

***If B90 is not equal to 1, then siga con P instrucción antes de B93.***

B91. ¿Qué edad tenías la primera vez que te inyectaste heroína sola?

— — años de edad  
98 Se rehúsa a contestar

*If B91 is less than B76 or B91 is greater than A1 and B91 is not equal to 98 then LEA: "La respuesta es menor que la edad en que el participante se inyecta drogas por primera vez o supera la edad del participante. Por favor revise la respuesta." and siga con P B91.*

B92. En los últimos 6 meses, en promedio ¿Qué tan seguido te inyectaste heroína sola en [LCOUNTRY]? (Escoja una)

- |    |                       |
|----|-----------------------|
| 00 | Nunca                 |
| 01 | 1 vez al mes o menos  |
| 02 | 2-3 días al mes       |
| 03 | Una vez a la semana   |
| 04 | 2-3 días a la semana  |
| 05 | 4-6 días a la semana  |
| 06 | Una vez al día        |
| 07 | 2-3 veces al día      |
| 08 | 4 veces o mas por día |
| 98 | Se rehúsa a contestar |

*If (B89 is equal to 0 or B89 is equal to 98 or B89 is equal to "Salto") and (B92 is equal to 0 or B92 is equal to 98 or B92 is equal to "Salto"), then siga con P B100.*

B93. En los últimos 6 meses, cuando usaste heroína en [LCOUNTRY], ¿de qué color era?  
**Entrevistador: Leer en voz alta todas las opciones y escoja todas las que apliquen**  
 (Marque todas las que apliquen)

- |   |                       |
|---|-----------------------|
| — | Goma negra            |
| — | Polvo café            |
| — | Polvo blanco          |
| — | Polvo amarillo        |
| — | Polvo naranja         |
| — | Otro                  |
| — | Se rehúsa a contestar |

***If B93F is not equal to 1, then siga con P instrucción antes de B95.***

B94. Por favor especifica el color de heroína que usaste.

-----

***If B92 is equal to 0 or B92 is equal to 98 or B92 is equal to "Salto", then siga con P B100.***

B95. En los últimos 6 meses, cuando te inyectaste heroína en [LCOUNTRY], de qué color fue más seguido? (Escoja una)

- |   |                       |
|---|-----------------------|
| 1 | Goma negra            |
| 2 | Polvo café            |
| 3 | Polvo blanco          |
| 4 | Polvo amarillo        |
| 5 | Polvo naranja         |
| 6 | Otro                  |
| 8 | Se rehúsa a contestar |

***If B95 is not equal to 6, then siga con P instrucción antes de B97.***

B96. Por favor especifica el color de heroína que usaste.

-----

***If B95 is not equal to 4, then siga con P instrucción antes de B98.***

B97. En los últimos 6 meses, cuando te inyectaste heroína en [LCOUNTRY], ¿Qué tan seguido fue color *amarillo*? (Escoja una)

- 1 Nunca
- 2 Menos de la mitad del tiempo
- 3 Casi la mitad del tiempo
- 4 Más de la mitad del tiempo
- 5 Siempre
- 8 Se rehúsa a contestar

*If B95 is not equal to 5, then siga con P instrucción antes de B99.*

B98. En los últimos 6 meses, cuando te inyectaste heroína en [LCOUNTRY], ¿Qué tan seguido fue color *naranja*? (Escoja una)

- 1 Nunca
- 2 Menos de la mitad del tiempo
- 3 Casi la mitad del tiempo
- 4 Más de la mitad del tiempo
- 5 Siempre
- 8 Se rehúsa a contestar

*If B95 is not equal to 6, then siga con P B100.*

B99. En los últimos 6 meses, cuando te inyectaste heroína en [LCOUNTRY], ¿Qué tan seguido fue [Respuesta a P B96]? (Escoja una)

- |   |                              |
|---|------------------------------|
| 1 | Nunca                        |
| 2 | Menos de la mitad del tiempo |
| 3 | Casi la mitad del tiempo     |
| 4 | Más de la mitad del tiempo   |
| 5 | Siempre                      |
| 8 | Se rehúsa a contestar        |

B100. ¿Alguna vez usaste cocaína o crack?

- |   |                       |
|---|-----------------------|
| 1 | Si                    |
| 0 | No                    |
| 8 | Se rehúsa a contestar |

***If B100 is not equal to 1, then siga con P B111.***

B101. ¿Alguna vez as fumado, aspirado o inhalado crack o cocaína en polvo?

- |   |                       |
|---|-----------------------|
| 1 | Si                    |
| 0 | No                    |
| 8 | Se rehúsa a contestar |

***If B101 is not equal to 1, then siga con P B104.***

B102. ¿Qué edad tenías la primera vez que fumaste, aspiraste o inhalaste crack o cocaína en polvo?

- |     |                       |
|-----|-----------------------|
| — — | años de edad          |
| 98  | Se rehúsa a contestar |

***If B102 is less than B73 or B102 is greater than A1 and B102 is not equal to 98 then LEA: "La respuesta es menor que la edad en que el participante usó drogas por primera vez o supera la edad del participante. Por favor revise la respuesta." and siga con P B102.***

B103. En los últimos 6 meses, en promedio ¿Qué tan seguido fumaste, aspiraste o inhalaste crack o cocaína en polvo cuando estabas en [LCOUNTRY]? (Escoja una)

- |    |                       |
|----|-----------------------|
| 00 | Nunca                 |
| 01 | 1 vez al mes o menos  |
| 02 | 2-3 días al mes       |
| 03 | Una vez a la semana   |
| 04 | 2-3 días a la semana  |
| 05 | 4-6 días a la semana  |
| 06 | Una vez al día        |
| 07 | 2-3 veces al día      |
| 08 | 4 veces o mas por día |
| 98 | Se rehúsa a contestar |

B104. ¿Alguna vez te has inyectado cocaína sola?

- |   |                       |
|---|-----------------------|
| 1 | Si                    |
| 0 | No                    |
| 8 | Se rehúsa a contestar |

*If B104 is not equal to 1, then siga con P instrucción antes de B107.*

B105. ¿Qué edad tenías la primera vez que te inyectaste cocaína sola?

- |     |                       |
|-----|-----------------------|
| — — | años de edad          |
| 98  | Se rehúsa a contestar |

*If B105 is less than B76 or B105 is greater than A1 and B105 is not equal to 98 then LEA: "La respuesta es menor que la edad en que el participante se inyecta drogas por primera vez o supera la edad del participante. Por favor revise la respuesta." and siga con P B105.*

B106. En los últimos 6 meses, en promedio ¿Qué tan seguido te inyectaste cocaína sola cuando estuviste en [LCOUNTRY]? (Escoja una)

- |    |                       |
|----|-----------------------|
| 00 | Nunca                 |
| 01 | 1 vez al mes o menos  |
| 02 | 2-3 días al mes       |
| 03 | Una vez a la semana   |
| 04 | 2-3 días a la semana  |
| 05 | 4-6 días a la semana  |
| 06 | Una vez al día        |
| 07 | 2-3 veces al día      |
| 08 | 4 veces o mas por día |
| 98 | Se rehúsa a contestar |

*If B86 is not equal to 1, then siga con P B111.*

B107. ¿Alguna vez te has inyectado heroína/heroína en goma y cocaína juntas (speedball)?

- |   |                       |
|---|-----------------------|
| 1 | Si                    |
| 0 | No                    |
| 8 | Se rehúsa a contestar |

*If B107 is not equal to 1, then siga con P B111.*

B108. ¿Qué edad tenías la primera vez que te inyectaste heroína y cocaína juntas (speedball)?

- |     |                       |
|-----|-----------------------|
| — — | años de edad          |
| 98  | Se rehúsa a contestar |

*If B108 is less than B76 or B108 is greater than A1 and B108 is not equal to 98 then LEA: "La respuesta es menor que la edad en que el participante se inyecta drogas por primera vez o supera la edad del participante. Por favor revise la respuesta." and siga con P B108.*



B109. En los últimos 6 meses, en promedio ¿Qué tan seguido te inyectaste heroína y cocaína juntas (speedball) cuando estuviste en [LCOUNTRY]? (Escoja una)

- |    |                       |
|----|-----------------------|
| 00 | Nunca                 |
| 01 | 1 vez al mes o menos  |
| 02 | 2-3 días al mes       |
| 03 | Una vez a la semana   |
| 04 | 2-3 días a la semana  |
| 05 | 4-6 días a la semana  |
| 06 | Una vez al día        |
| 07 | 2-3 veces al día      |
| 08 | 4 veces o mas por día |
| 98 | Se rehúsa a contestar |

*If B109 is equal to 0 or B109 is equal to 98, then siga con P B111.*

B110. En los últimos 6 meses, en promedio cuantas veces al dia ¿Te inyectaste heroína y cocaína juntas (speedball)? **ENTREVISTADOR: si el participante dice No se preguntarle por un estimado.**

- |     |                       |
|-----|-----------------------|
| — — | veces al día          |
| 97  | No sé                 |
| 98  | Se rehúsa a contestar |

B111. ¿Alguna vez has usado metanfetamina (cristal)?

- |   |                       |
|---|-----------------------|
| 1 | Si                    |
| 0 | No                    |
| 8 | Se rehúsa a contestar |

*If B111 is not equal to 1, then siga con P B128.*

B112. ¿Alguna vez has fumado, aspirado, inhalado o vapeado metanfetamina (cristal) sola?

- |   |                       |
|---|-----------------------|
| 1 | Si                    |
| 0 | No                    |
| 8 | Se rehúsa a contestar |

***If B112 is not equal to 1, then siga con P B115.***

B113. ¿Qué edad tenías la primera vez que fumaste, aspiraste, inhalaste o vapeaste metanfetamina /cristal?

- |     |                       |
|-----|-----------------------|
| — — | años de edad          |
| 98  | Se rehúsa a contestar |

***If B113 is less than B73 or B113 is greater than A1 and B113 is not equal to 98 then LEA: "La respuesta es menor que la edad en que el participante usó drogas por primera vez o supera la edad del participante. Por favor revise la respuesta." and siga con P B113.***

B114. En los últimos 6 meses, en promedio ¿Qué tan seguido fumaste, aspiraste, inhalaste o vapeaste metanfetamina (cristal) en [LCOUNTRY]? (Escoja una)

- |    |                       |
|----|-----------------------|
| 00 | Nunca                 |
| 01 | 1 vez al mes o menos  |
| 02 | 2-3 días al mes       |
| 03 | Una vez a la semana   |
| 04 | 2-3 días a la semana  |
| 05 | 4-6 días a la semana  |
| 06 | Una vez al día        |
| 07 | 2-3 veces al día      |
| 08 | 4 veces o mas por día |
| 98 | Se rehúsa a contestar |

- B115. ¿Alguna vez te has inyectado metanfetamina/cristal solo?
- |   |                       |
|---|-----------------------|
| 1 | Si                    |
| 0 | No                    |
| 8 | Se rehúsa a contestar |

***If B115 is not equal to 1, then siga con P instrucción antes de B122.***

- B116. ¿Qué edad tenías la primera vez que te inyectaste cristal solo?

|     |                       |
|-----|-----------------------|
| — — | años de edad          |
| 98  | Se rehúsa a contestar |

***If B116 is less than B76 or B116 is greater than A1 and B116 is not equal to 98 then LEA: "La respuesta es menor que la edad en que el participante se inyecta drogas por primera vez o supera la edad del participante. Por favor revise la respuesta." and siga con P B116.***

- B117. En los últimos 6 meses, en promedio ¿Qué tan seguido te inyectaste metanfetaminas/cristal solo cuando estuviste en el condado de [LCOUNTRY]? (Escoja una)

|    |                       |
|----|-----------------------|
| 00 | Nunca                 |
| 01 | 1 vez al mes o menos  |
| 02 | 2-3 días al mes       |
| 03 | Una vez a la semana   |
| 04 | 2-3 días a la semana  |
| 05 | 4-6 días a la semana  |
| 06 | Una vez al día        |
| 07 | 2-3 veces al día      |
| 08 | 4 veces o mas por día |
| 98 | Se rehúsa a contestar |

***If B117 is equal to 0 or B117 is equal to 98, then siga con P instrucción antes de B122.***

B118. En los últimos 6 meses cuando te inyectaste metanfetaminas (sola o en combinación con otras drogas) en [LCOUNTRY], de qué color era? (Marque todas las que apliquen)

- Blanco
- Rosa
- Verde
- Negro
- Amarillo
- Hielo (transparente)
- Otro
- Se rehúsa a contestar

***If B118G is not equal to 1, then siga con P instrucción antes de B120.***

B119. Por favor especifica el color de metanfetaminas

-----

***If B118A + B118B + B118C + B118D + B118E + B118F + B118G is equal to 1 or B118 is equal to 8, then siga con P instrucción antes de B122.***

B120. En los últimos 6 meses, cuando te inyectaste metanfetaminas en [LCOUNTRY], de qué color fue más seguido? (Escoja una)

- 1 Blanco
- 2 Rosa
- 3 Verde
- 4 Negro
- 5 Amarillo
- 6 Hielo (transparente)
- 7 Otro
- 8 Se rehúsa a contestar

***If B120 is equal to 1 and B118A is not equal to 1 or B120 is equal to 2 and B118B is not equal to 1 or B120 is equal to 3 and B118C is not equal to 1 or B120 is equal to 4 and B118D is not equal to 1 or B120 is equal to 5 and B118E is not equal to 1 or B120 is equal to 6 and B118F is not equal to 1 or B120 is equal to 7 and B118G is not equal to 1 then LEA: "El participante solo puede elegir el color más frecuente de los colores mencionados anteriormente." and siga con P B120.***

***If B120 is not equal to 7, then siga con P instrucción antes de B122.***

B121. Por favor especifica el color de metanfetaminas

-----

***If B100 is not equal to 1, then siga con P instrucción antes de B125.***

B122. ¿Alguna vez te inyectaste metanfetaminas/cristal y cocaína juntas?

- 1 Si
- 0 No
- 8 Se rehúsa a contestar

***If B122 is not equal to 1, then siga con P instrucción antes de B125.***

B123. ¿Qué edad tenías la primera vez que te inyectaste metanfetaminas/cristal y cocaína juntas?

- \_\_\_ años de edad
- 98 Se rehúsa a contestar

***If B123 is less than B76 or B123 is greater than A1 and B123 is not equal to 98 then LEA: "La respuesta es menor que la edad en que el participante se inyecta drogas por primera vez o supera la edad del participante. Por favor revise la respuesta." and siga con P B123.***

B124. En los últimos 6 meses, en promedio, ¿qué tan seguido te inyectaste metanfetaminas/cristal y cocaína juntas cuando estuviste en [LCOUNTRY]? (Escoja una)

- |    |                       |
|----|-----------------------|
| 00 | Nunca                 |
| 01 | 1 vez al mes o menos  |
| 02 | 2-3 días al mes       |
| 03 | Una vez a la semana   |
| 04 | 2-3 días a la semana  |
| 05 | 4-6 días a la semana  |
| 06 | Una vez al día        |
| 07 | 2-3 veces al día      |
| 08 | 4 veces o mas por día |
| 98 | Se rehúsa a contestar |

*If B86 is not equal to 1, then siga con P B128.*

B125. ¿Alguna vez te has inyectado metanfetaminas/cristal y heroína juntas?

- |   |                       |
|---|-----------------------|
| 1 | Si                    |
| 0 | No                    |
| 8 | Se rehúsa a contestar |

*If B125 is not equal to 1, then siga con P B128.*

B126. ¿Qué edad tenías la primera vez que te inyectaste metanfetaminas/cristal y heroína juntas?

- |     |                       |
|-----|-----------------------|
| — — | años de edad          |
| 98  | Se rehúsa a contestar |

*If B126 is less than B76 or B126 is greater than A1 and B126 is not equal to 98 then LEA: "La respuesta es menor que la edad en que el participante se inyecta drogas por primera vez o supera la edad del participante. Por favor revise la respuesta." and siga con P B126.*

B127. En los últimos 6 meses, en promedio, ¿qué tan seguido te inyectaste metanfetaminas/cristal y heroína juntas en [LCOUNTRY]? (Escoja una)

- |    |                       |
|----|-----------------------|
| 00 | Nunca                 |
| 01 | 1 vez al mes o menos  |
| 02 | 2-3 días al mes       |
| 03 | Una vez a la semana   |
| 04 | 2-3 días a la semana  |
| 05 | 4-6 días a la semana  |
| 06 | Una vez al día        |
| 07 | 2-3 veces al día      |
| 08 | 4 veces o mas por día |
| 98 | Se rehúsa a contestar |

B128. ¿Qué tipo/s de drogas crees que están presentes en China White? (Marque todas las que apliquen)

- Heroína
- Fentanilo
- Oxycontin
- Opioides recetados (Vicodin, Darvon, Percocet)
- Metanfetamina
- Cocaína
- Crocodilo
- Barbitúricos
- Agente de corte (ej. Talco de bebe, leche en polvo, cafeína, bicarbonato de sodio, etc)
- Veneno
- Otro (especifica)
- No sé
- Se rehúsa a contestar

***If B128K is not equal to 1, then siga con P instrucción antes de B130.***

B129. Especifica qué tipo de droga o combinación de drogas sea China White.

-----

***If B128B is equal to 1, then siga con P B140.***

- |                                          |   |                       |
|------------------------------------------|---|-----------------------|
| B130. ¿Alguna vez has usado China White? | 1 | Si                    |
|                                          | 0 | No                    |
|                                          | 8 | Se rehúsa a contestar |

***If B130 is not equal to 1, then siga con P B140.***



B131. ¿Alguna vez has fumado, aspirado, inhalado o vapeado China White?

- |   |                       |
|---|-----------------------|
| 1 | Si                    |
| 0 | No                    |
| 8 | Se rehúsa a contestar |

*If B131 is not equal to 1, then siga con P B134.*

B132. ¿Qué edad tenías la primera vez que fumaste, aspiraste, inhalaste o vapeaste China White?

- |     |                       |
|-----|-----------------------|
| — — | años de edad          |
| 98  | Se rehúsa a contestar |

*If B132 is less than B73 or B132 is greater than A1 and B132 is not equal to 98 then LEA: "La respuesta es menor que la edad en que el participante usó drogas por primera vez o supera la edad del participante. Por favor revise la respuesta." and siga con P B132.*

B133. En los últimos 6 meses, ¿qué tan seguido fumaste, aspiraste, o inhalaste China White en [LCOUNTRY]? (Escoja una)

- |    |                       |
|----|-----------------------|
| 00 | Nunca                 |
| 01 | 1 vez al mes o menos  |
| 02 | 2-3 días al mes       |
| 03 | Una vez a la semana   |
| 04 | 2-3 días a la semana  |
| 05 | 4-6 días a la semana  |
| 06 | Una vez al día        |
| 07 | 2-3 veces al día      |
| 08 | 4 veces o mas por día |
| 98 | Se rehúsa a contestar |

- B134. ¿Alguna vez te inyectaste China White sola?
- |   |                       |
|---|-----------------------|
| 1 | Si                    |
| 0 | No                    |
| 8 | Se rehúsa a contestar |

*If B134 is not equal to 1, then siga con P instrucción antes de B137.*

- B135. ¿Qué edad tenías la primera vez que te inyectaste China White sola?

|       |                       |
|-------|-----------------------|
| __ __ | años de edad          |
| 98    | Se rehúsa a contestar |

*If B135 is less than B76 or B135 is greater than A1 and B135 is not equal to 98 then LEA: "La respuesta es menor que la edad en que el participante se inyecta drogas por primera vez o supera la edad del participante. Por favor revise la respuesta." and siga con P B135.*

- B136. En los últimos 6 meses, cuando usaste China White en [LCOUNTRY], en promedio, ¿qué tan seguido te la inyectaste sola? (Escoja una)

|    |                       |
|----|-----------------------|
| 00 | Nunca                 |
| 01 | 1 vez al mes o menos  |
| 02 | 2-3 días al mes       |
| 03 | Una vez a la semana   |
| 04 | 2-3 días a la semana  |
| 05 | 4-6 días a la semana  |
| 06 | Una vez al día        |
| 07 | 2-3 veces al día      |
| 08 | 4 veces o mas por día |
| 98 | Se rehúsa a contestar |

*If B111 is not equal to 1, then siga con P B140.*

B137. ¿Alguna vez te has inyectado China White y metanfetaminas/cristal juntas?

- |   |                       |
|---|-----------------------|
| 1 | Si                    |
| 0 | No                    |
| 8 | Se rehúsa a contestar |

*If B137 is not equal to 1, then siga con P B140.*

B138. ¿Qué edad tenías la primera vez que te inyectaste China White y metanfetaminas/cristal juntas?

- |     |                       |
|-----|-----------------------|
| — — | años de edad          |
| 98  | Se rehúsa a contestar |

*If B138 is less than B76 or B138 is greater than A1 and B138 is not equal to 98 then LEA: "La respuesta es menor que la edad en que el participante se inyecta drogas por primera vez o supera la edad del participante. Por favor revise la respuesta." and siga con P B138.*

B139. En los últimos 6 meses, ¿cuándo usaste China White y metanfetaminas/cristal juntas en [LCOUNTRY], en promedio que tan seguido te inyectaste las dos juntas? (Escoja una)

- |    |                       |
|----|-----------------------|
| 00 | Nunca                 |
| 01 | 1 vez al mes o menos  |
| 02 | 2-3 días al mes       |
| 03 | Una vez a la semana   |
| 04 | 2-3 días a la semana  |
| 05 | 4-6 días a la semana  |
| 06 | Una vez al día        |
| 07 | 2-3 veces al día      |
| 08 | 4 veces o mas por día |
| 98 | Se rehúsa a contestar |

- B140. ¿Alguna vez has usado fentanilo (fentanyl)?
- |   |                       |
|---|-----------------------|
| 1 | Si                    |
| 0 | No                    |
| 7 | No sé                 |
| 8 | Se rehúsa a contestar |

***If B140 is not equal to 1, then siga con P B154.***

- B141. ¿Alguna vez fumaste, inhalaste, aspiraste o vapeaste fentanilo (fentanyl)?
- |   |                       |
|---|-----------------------|
| 1 | Si                    |
| 0 | No                    |
| 8 | Se rehúsa a contestar |

***If B141 is not equal to 1, then siga con P B144.***

- B142. ¿Qué edad tenías la primera vez que fumaste, inhalaste, aspiraste o vapeaste fentanilo (fentanyl)?
- |     |                       |
|-----|-----------------------|
| — — | años de edad          |
| 98  | Se rehúsa a contestar |

***If B142 is less than B73 or B142 is greater than A1 and B142 is not equal to 98 then LEA: "La respuesta es menor que la edad en que el participante usó drogas por primera vez o supera la edad del participante. Por favor revise la respuesta." and siga con P B142.***

B143. Durante los últimos 6 meses, en promedio ¿qué tan seguido fumaste, inhalaste, aspiraste o vapeaste fentanilo (fentanyl) cuando estuviste en [LCOUNTRY]? (Escoja una)

- |    |                       |
|----|-----------------------|
| 00 | Nunca                 |
| 01 | 1 vez al mes o menos  |
| 02 | 2-3 días al mes       |
| 03 | Una vez a la semana   |
| 04 | 2-3 días a la semana  |
| 05 | 4-6 días a la semana  |
| 06 | Una vez al día        |
| 07 | 2-3 veces al día      |
| 08 | 4 veces o mas por día |
| 98 | Se rehúsa a contestar |

B144. ¿Alguna vez te has inyectado fentanilo (fentanyl) solo?

- |   |                       |
|---|-----------------------|
| 1 | Si                    |
| 0 | No                    |
| 8 | Se rehúsa a contestar |

*If B144 is not equal to 1, then siga con P instrucción antes de B151.*

B145. ¿Qué edad tenías la primera vez que inyectaste fentanilo (fentanyl) solo?

- |     |                       |
|-----|-----------------------|
| — — | años de edad          |
| 98  | Se rehúsa a contestar |

*If B145 is less than B76 or B145 is greater than A1 and B145 is not equal to 98 then LEA: "La respuesta es menor que la edad en que el participante se inyecta drogas por primera vez o supera la edad del participante. Por favor revise la respuesta." and siga con P B145.*

B146. Durante los últimos 6 meses cuando estuviste en [LCOUNTRY], en promedio ¿Qué tan seguido te inyectaste fentanilo (fentanyl) solo? (Escoja una)

- |    |                       |
|----|-----------------------|
| 00 | Nunca                 |
| 01 | 1 vez al mes o menos  |
| 02 | 2-3 días al mes       |
| 03 | Una vez a la semana   |
| 04 | 2-3 días a la semana  |
| 05 | 4-6 días a la semana  |
| 06 | Una vez al día        |
| 07 | 2-3 veces al día      |
| 08 | 4 veces o mas por día |
| 98 | Se rehúsa a contestar |

***If B146 is equal to 0 or B146 is equal to 98 or B146 is equal to "Salto", then siga con P instrucción antes de B151.***

B147. En los últimos 6 meses, cuando estuviste en [LCOUNTRY], de que colores era el Fentanilo (Fentanyl) que te inyectaste (sea por si solo o en combinación con otra droga)? (Marque todas las que apliquen)

- |   |                       |
|---|-----------------------|
| — | Blanco                |
| — | Amarillo              |
| — | Naranja               |
| — | Café                  |
| — | Azul                  |
| — | Otro                  |
| — | Se rehúsa a contestar |

***If B147F is not equal to 1, then siga con P instrucción antes de B149.***

B148. Especifica otro color de fentanilo (Fentanyl)

-----

***If B147A + B147B + B147C + B147D + B147E + B147F is equal to 1 or B147 is equal to 8, then siga con P instrucción antes de B151.***

B149. En los últimos 6 meses, cuando te inyectaste Fentanilo (Fentanyl) en [LCOUNTRY] de que color era mas seguido? (Escoja una)

- |   |                       |
|---|-----------------------|
| 1 | Blanco                |
| 2 | Amarillo              |
| 3 | Naranja               |
| 4 | Café                  |
| 5 | Azul                  |
| 6 | Otro                  |
| 8 | Se rehúsa a contestar |

***If B149 is equal to 1 and B147A is not equal to 1 or B149 is equal to 2 and B147B is not equal to 1 or B149 is equal to 3 and B147C is not equal to 1 or B149 is equal to 4 and B147D is not equal to 1 or B149 is equal to 5 and B147E is not equal to 1 or B149 is equal to 6 and B147F is not equal to 1 then LEA: "El participante solo puede elegir el color más frecuente de los colores mencionados anteriormente." and siga con P B149.***

***If B149 is not equal to 6, then siga con P instrucción antes de B151.***

B150. Especifica el color de fentanilo (Fentanyl)

-----

***If B111 is not equal to 1, then siga con P B154.***

B151. ¿Alguna vez te has inyectado fentanilo (fentanyl) y metanfetaminas/cristal juntos?

- |   |                       |
|---|-----------------------|
| 1 | Si                    |
| 0 | No                    |
| 8 | Se rehúsa a contestar |

***If B151 is not equal to 1, then siga con P B154.***

B152. ¿Qué edad tenías la primera vez que inyectaste fentanilo (fentanyl) y metanfetaminas/cristal juntos?

|       |                       |
|-------|-----------------------|
| __ __ | años de edad          |
| 98    | Se rehúsa a contestar |

***If B152 is less than B76 or B152 is greater than A1 and B152 is not equal to 98 then LEA: "La respuesta es menor que la edad en que el participante se inyecta drogas por primera vez o supera la edad del participante. Por favor revise la respuesta." and siga con P B152.***

B153. En los últimos 6 meses, cuando estuviste en [LCOUNTRY], en promedio, ¿Qué tan seguido te inyectaste fentanilo (fentanyl) y metanfetaminas/cristal juntos? (Escoja una)

|    |                       |
|----|-----------------------|
| 00 | Nunca                 |
| 01 | 1 vez al mes o menos  |
| 02 | 2-3 días al mes       |
| 03 | Una vez a la semana   |
| 04 | 2-3 días a la semana  |
| 05 | 4-6 días a la semana  |
| 06 | Una vez al día        |
| 07 | 2-3 veces al día      |
| 08 | 4 veces o mas por día |
| 98 | Se rehúsa a contestar |

B154. ¿Alguna vez has usado PCP/Polvo de Angel?

|   |                       |
|---|-----------------------|
| 1 | Si                    |
| 0 | No                    |
| 8 | Se rehúsa a contestar |

***If B154 is not equal to 1, then siga con P B158.***



|                                                           |   |                       |
|-----------------------------------------------------------|---|-----------------------|
| B155. ¿Alguna vez has fumado/inhalado PCP/Polvo de Ángel? | 1 | Si                    |
|                                                           | 0 | No                    |
|                                                           | 8 | Se rehúsa a contestar |

*If B155 is not equal to 1, then siga con P B158.*

|                                                                                              |     |                       |
|----------------------------------------------------------------------------------------------|-----|-----------------------|
| B156. ¿Cuantos años tenías cuando fumaste o inhalaste PCP/Polvo de Ángel por la primera vez? | — — | años de edad          |
|                                                                                              | 98  | Se rehúsa a contestar |

*If B156 is less than B73 or B156 is greater than A1 and B156 is not equal to 98 then LEA: "La respuesta es menor que la edad en que el participante usó drogas por primera vez o supera la edad del participante. Por favor revise la respuesta." and siga con P B156.*

|                                                                                                                                                  |    |                       |
|--------------------------------------------------------------------------------------------------------------------------------------------------|----|-----------------------|
| B157. En los últimos 6 meses, cuando usaste PCP/Polvo de Ángel en [LCOUNTRY], en promedio, ¿qué tan seguido lo fumaste o inhalaste? (Escoja una) | 00 | Nunca                 |
|                                                                                                                                                  | 01 | 1 vez al mes o menos  |
|                                                                                                                                                  | 02 | 2-3 días al mes       |
|                                                                                                                                                  | 03 | Una vez a la semana   |
|                                                                                                                                                  | 04 | 2-3 días a la semana  |
|                                                                                                                                                  | 05 | 4-6 días a la semana  |
|                                                                                                                                                  | 06 | Una vez al día        |
|                                                                                                                                                  | 07 | 2-3 veces al día      |
|                                                                                                                                                  | 08 | 4 veces o mas por día |
|                                                                                                                                                  | 98 | Se rehúsa a contestar |
| B158. ¿Alguna vez has usado éxtasis?                                                                                                             | 1  | Si                    |
|                                                                                                                                                  | 0  | No                    |
|                                                                                                                                                  | 8  | Se rehúsa a contestar |



B162. En los últimos 6 meses si usaste éxtasis en [LCOUNTRY], ¿Cómo los usaste?  
**Entrevistador: Si el participante indica que no usó éxtasis en [LCOUNTRY] en los últimos 6 meses, marque No corresponde.**  
 (Marque todas las que apliquen)

- Inyectado
- Fumado (chasing)
- Aspirado
- Inhalado
- Tomado
- Rectal (bumping)
- Otro
- No corresponde
- Se rehúsa a contestar

*If B162 is greater than 1 and B162H is equal to 1 then LEA: "Solo puedes escoger la opcion "No corresponde" por si sola, verificar respuesta." and siga con P B162.*

*If B162G is not equal to 1, then siga con P instrucción antes de B164.*

B163. Especifica de que otra manera has usado éxtasis en los últimos 6 meses en Estados Unidos.

-----

*If B162A is not equal to 1, then siga con P instrucción antes de B165.*

B164. En los últimos 6 meses, cuando usaste éxtasis en [LCOUNTRY], en promedio, ¿qué tan seguido te lo inyectaste? (Escoja una)

- |    |                       |
|----|-----------------------|
| 00 | Nunca                 |
| 01 | 1 vez al mes o menos  |
| 02 | 2-3 días al mes       |
| 03 | Una vez a la semana   |
| 04 | 2-3 días a la semana  |
| 05 | 4-6 días a la semana  |
| 06 | Una vez al día        |
| 07 | 2-3 veces al día      |
| 08 | 4 veces o mas por día |
| 98 | Se rehúsa a contestar |

*If B162H is equal to 1 or B162 is equal to 9, then siga con P B166.*

B165. En los últimos 6 meses, cuando usaste éxtasis en [LCOUNTRY], en promedio, ¿qué tan seguido lo usaste de otra manera (no inyectada)? (Escoja una)

- |    |                       |
|----|-----------------------|
| 00 | Nunca                 |
| 01 | 1 vez al mes o menos  |
| 02 | 2-3 días al mes       |
| 03 | Una vez a la semana   |
| 04 | 2-3 días a la semana  |
| 05 | 4-6 días a la semana  |
| 06 | Una vez al día        |
| 07 | 2-3 veces al día      |
| 08 | 4 veces o mas por día |
| 98 | Se rehúsa a contestar |

- B166. ¿Alguna vez ha usado Ketamina (Special K, K)?
- |   |                       |
|---|-----------------------|
| 1 | Si                    |
| 0 | No                    |
| 8 | Se rehúsa a contestar |

*If B166 is not equal to 1, then siga con P B174.*

- B167. ¿Qué edad tenías la primera vez que usaste Ketamina?   \_\_ \_\_ años de edad
- |    |                       |
|----|-----------------------|
| 98 | Se rehúsa a contestar |
|----|-----------------------|

*If B167 is less than B73 or B167 is greater than A1 and B167 is not equal to 98 then LEA: "La respuesta es menor que la edad en que el participante usó drogas por primera vez o supera la edad del participante. Por favor revise la respuesta." and siga con P B167.*

- B168. ¿Alguna vez te has inyectado Ketamina?
- |   |                       |
|---|-----------------------|
| 1 | Si                    |
| 0 | No                    |
| 8 | Se rehúsa a contestar |

*If B168 is not equal to 1, then siga con P B170.*

- B169. ¿Qué edad tenías la primera vez que te inyectaste Ketamina?
- |       |                       |
|-------|-----------------------|
| __ __ | años de edad          |
| 98    | Se rehúsa a contestar |

*If B169 is less than B76 or B169 is greater than A1 and B169 is not equal to 98 then LEA: "La respuesta es menor que la edad en que el participante se inyecta drogas por primera vez o supera la edad del participante. Por favor revise la respuesta." and siga con P B169.*

B170. Si usaste ketamina en los últimos 6 meses en [LCOUNTRY], ¿Cómo los usaste?  
**Entrevistador: Si el participante indica que no usó ketamina en [LCOUNTRY] en los últimos 6 meses, marque No corresponde.**  
 (Marque todas las que apliquen)

- Inyectado
- Fumado (chasing)
- Aspirado
- Inhalado
- Tomado
- Rectal (bumping)
- Otro
- No corresponde
- Se rehúsa a contestar

*If B170 is greater than 1 and B170H is equal to 1 then LEA: "Solo puedes escoger la opcion "No corresponde" por si sola, verificar respuesta." and siga con P B170.*

*If B170G is not equal to 1, then siga con P instrucción antes de B172.*

B171. Especifica de que otra manera usaste Ketamina en los últimos 6 meses.

-----

*If B170A is not equal to 1, then siga con P instrucción antes de B173.*

B172. Durante los últimos 6 meses cuando usaste ketamina en [LCOUNTRY], en promedio, ¿Qué tan seguido te la inyectaste? (Escoja una)

- |    |                       |
|----|-----------------------|
| 00 | Nunca                 |
| 01 | 1 vez al mes o menos  |
| 02 | 2-3 días al mes       |
| 03 | Una vez a la semana   |
| 04 | 2-3 días a la semana  |
| 05 | 4-6 días a la semana  |
| 06 | Una vez al día        |
| 07 | 2-3 veces al día      |
| 08 | 4 veces o mas por día |
| 98 | Se rehúsa a contestar |
| 09 | No corresponde        |

***If B170H is equal to 1 or B170 is equal to 98, then siga con P B174.***

B173. Durante los últimos 6 meses cuando usaste ketamina en [LCOUNTRY], en promedio, ¿Qué tan seguido la usaste de otras maneras (no inyectadas)? (Escoja una)

- 00 Nunca
- 01 1 vez al mes o menos
- 02 2-3 días al mes
- 03 Una vez a la semana
- 04 2-3 días a la semana
- 05 4-6 días a la semana
- 06 Una vez al día
- 07 2-3 veces al día
- 08 4 veces o mas por día
- 98 Se rehúsa a contestar
- 09 No corresponde

B174. ¿Alguna vez has usado OxyContin?

- 1 Si
- 0 No
- 8 Se rehúsa a contestar

*If B174 is not equal to 1, then siga con P B182.*

B175. ¿Qué edad tenías la primera vez que usaste Oxycontin? \_\_\_ años de edad

- 98 Se rehúsa a contestar

*If B175 is less than B73 or B175 is greater than A1 and B175 is not equal to 98 then LEA: "La respuesta es menor que la edad en que el participante usó drogas por primera vez o supera la edad del participante. Por favor revise la respuesta." and siga con P B175.*

B176. ¿Alguna vez te has inyectado oxycontin?

- 1 Si
- 0 No
- 8 Se rehúsa a contestar



**If B176 is not equal to 1, then siga con P B178.**

B177. ¿Qué edad tenías la primera vez que te inyectaste oxycontin?

\_\_\_ años de edad  
 98 Se rehúsa a contestar

**If B177 is less than B76 or B177 is greater than A1 and B177 is not equal to 98 then LEA: "La respuesta es menor que la edad en que el participante se inyecta drogas por primera vez o supera la edad del participante. Por favor revise la respuesta." and siga con P B177.**

B178. Si usaste oxycontin en los últimos 6 meses en [LCOUNTRY], ¿Cómo los usaste?  
**Entrevistador: Si el participante indica que no usó oxycontin en [LCOUNTRY] en los últimos 6 meses, marque No corresponde.**  
 (Marque todas las que apliquen)

- \_\_\_ Inyectado
- \_\_\_ Fumado (chasing)
- \_\_\_ Aspirado
- \_\_\_ Inhalado
- \_\_\_ Tomado
- \_\_\_ Rectal (bumping)
- \_\_\_ Otro
- \_\_\_ No corresponde
- \_\_\_ Se rehúsa a contestar

**If B178 is greater than 1 and B178H is equal to 1 then LEA: "Solo puedes escoger la opcion "No corresponde" por si sola, verificar respuesta." and siga con P B178.**

**If B178G is not equal to 1, then siga con P instrucción antes de B180.**

B179. Especifica de que otra manera usaste Oxycontin en los últimos 6 meses.

-----

**If B178A is not equal to 1, then siga con P instrucción antes de B181.**

B180. En los últimos 6 meses cuando usaste oxycontin en [LCOUNTRY], en promedio, ¿Qué tan seguido te lo inyectaste? (Escoja una)

- |    |                       |
|----|-----------------------|
| 00 | Nunca                 |
| 01 | 1 vez al mes o menos  |
| 02 | 2-3 días al mes       |
| 03 | Una vez a la semana   |
| 04 | 2-3 días a la semana  |
| 05 | 4-6 días a la semana  |
| 06 | Una vez al día        |
| 07 | 2-3 veces al día      |
| 08 | 4 veces o mas por día |
| 98 | Se rehúsa a contestar |
| 09 | No corresponde        |

*If B178H is equal to 1 or B178 is equal to 98, then siga con P B182.*

B181. En los últimos 6 meses cuando usaste oxycontin en [LCOUNTRY], en promedio, ¿Qué tan seguido lo usaste de otras maneras (no inyectado)? (Escoja una)

- 00 Nunca
- 01 1 vez al mes o menos
- 02 2-3 días al mes
- 03 Una vez a la semana
- 04 2-3 días a la semana
- 05 4-6 días a la semana
- 06 Una vez al día
- 07 2-3 veces al día
- 08 4 veces o mas por día
- 98 Se rehúsa a contestar
- 09 No corresponde

B182. ¿Alguna vez has usado otros opioides de receta (Vicodin, Darvon, Percocet)?

- 1 Si
- 0 No
- 8 Se rehúsa a contestar

*If B182 is not equal to 1, then siga con P B190.*

B183. ¿Qué edad tenías la primera vez que usaste opioides de receta (Vicodin, Darvon, Percocet)?

- — años de edad
- 98 Se rehúsa a contestar

*If B183 is less than B73 or B183 is greater than A1 and B183 is not equal to 98 then LEA: "La respuesta es menor que la edad en que el participante usó drogas por primera vez o supera la edad del participante. Por favor revise la respuesta." and siga con P B183.*

B184. ¿Alguna vez te has inyectado opioides de receta (Vicodin, Darvon, Percocet)?

- 1 Si  
0 No  
8 Se rehúsa a contestar

*If B184 is not equal to 1, then siga con P B186.*

B185. ¿Qué edad tenías la primera vez que te inyectaste opioides de receta (Vicodin, Darvon, Percocet)?

- años de edad  
98 Se rehúsa a contestar

*If B185 is less than B76 or B185 is greater than A1 and B185 is not equal to 98 then LEA: "La respuesta es menor que la edad en que el participante se inyecta drogas por primera vez o supera la edad del participante. Por favor revise la respuesta." and siga con P B185.*

B186. Si usaste opioides de receta (Vicodin, Darvon, Percocet) en los últimos 6 meses en [LCOUNTRY], ¿Cómo los usaste?

**Entrevistador: Si el participante indica que no usó opioides de receta en [LCOUNTRY] en los últimos 6 meses, marque No corresponde.**

(Marque todas las que apliquen)

- Inyectado  
— Fumado (chasing)  
— Aspirado  
— Inhalado  
— Tomado  
— Rectal (bumping)  
— Otro  
— No corresponde  
— Se rehúsa a contestar

*If B186 is greater than 1 and B186H is equal to 1 then LEA: "Solo puedes escoger la opcion "No corresponde" por si sola, verificar respuesta." and siga con P B186.*

***If B186G is not equal to 1, then siga con P instrucción antes de B188.***

B187. Por favor, especifica de que otra manera has usado opioides de receta (Vicodin, Darvon, Percocet) en los últimos 6 meses.

-----

***If B186A is not equal to 1, then siga con P instrucción antes de B189.***

B188. En los últimos 6 meses cuando usaste opioides de receta (Vicodin, Darvon, Percocet) en [LCOUNTRY], en promedio, ¿Qué tan seguido te los inyectaste? (Escoja una)

- |    |                       |
|----|-----------------------|
| 00 | Nunca                 |
| 01 | 1 vez al mes o menos  |
| 02 | 2-3 días al mes       |
| 03 | Una vez a la semana   |
| 04 | 2-3 días a la semana  |
| 05 | 4-6 días a la semana  |
| 06 | Una vez al día        |
| 07 | 2-3 veces al día      |
| 08 | 4 veces o mas por día |
| 98 | Se rehúsa a contestar |
| 09 | No corresponde        |

***If B186H is equal to 1 or B186 is equal to 98, then siga con P B190.***

B189. En los últimos 6 meses cuando usaste opioides de receta (Vicodin, Darvon, Percocet) en [LCOUNTRY], en promedio, ¿Qué tan seguido lo usaste de otra manera (no inyectado)? (Escoja una)

- |    |                       |
|----|-----------------------|
| 00 | Nunca                 |
| 01 | 1 vez al mes o menos  |
| 02 | 2-3 días al mes       |
| 03 | Una vez a la semana   |
| 04 | 2-3 días a la semana  |
| 05 | 4-6 días a la semana  |
| 06 | Una vez al día        |
| 07 | 2-3 veces al día      |
| 08 | 4 veces o mas por día |
| 98 | Se rehúsa a contestar |

B190. ¿Alguna vez has usado drogas alucinógenas como ácido, LSD, peyote, mezcalina, hongos?

- |   |                       |
|---|-----------------------|
| 1 | Si                    |
| 0 | No                    |
| 8 | Se rehúsa a contestar |

***If B190 is not equal to 1, then siga con P B193.***

B191. ¿Qué edad tenías la primera vez que usaste drogas alucinógenas como ácido, LSD, peyote, mezcalina, hongos?

- |       |                       |
|-------|-----------------------|
| __ __ | años de edad          |
| 98    | Se rehúsa a contestar |

***If B191 is less than B73 or B191 is greater than A1 and B191 is not equal to 98 then LEA: "La respuesta es menor que la edad en que el participante usó drogas por primera vez o supera la edad del participante. Por favor revise la respuesta." and siga con P B191.***

B192. En los últimos 6 meses, en promedio, ¿qué tan seguido usaste drogas alucinógenas como ácido, LSD, peyote, mezcalina, hongos mientras estabas en [LCOUNTRY]? (Escoja una)

- |    |                       |
|----|-----------------------|
| 00 | Nunca                 |
| 01 | 1 vez al mes o menos  |
| 02 | 2-3 días al mes       |
| 03 | Una vez a la semana   |
| 04 | 2-3 días a la semana  |
| 05 | 4-6 días a la semana  |
| 06 | Una vez al día        |
| 07 | 2-3 veces al día      |
| 08 | 4 veces o mas por día |
| 98 | Se rehúsa a contestar |

B193. ¿Alguna vez has usado inhalantes (goma resistol o gasolina)?

- |   |                       |
|---|-----------------------|
| 1 | Si                    |
| 0 | No                    |
| 8 | Se rehúsa a contestar |

*If B193 is not equal to 1, then siga con P B196.*

B194. ¿Qué edad tenías la primera vez que usaste inhalantes (goma resistol o gasolina)?

- |     |                       |
|-----|-----------------------|
| — — | años de edad          |
| 98  | Se rehúsa a contestar |

*If B194 is less than B73 or B194 is greater than A1 and B194 is not equal to 98 then LEA: "La respuesta es menor que la edad en que el participante usó drogas por primera vez o supera la edad del participante. Por favor revise la respuesta." and siga con P B194.*

B195. Durante los últimos 6 meses, en promedio que tan seguido usaste inhalantes (goma resistol o gasolina) cuando estuviste en [LCOUNTRY]? (Escoja una)

- |    |                       |
|----|-----------------------|
| 00 | Nunca                 |
| 01 | 1 vez al mes o menos  |
| 02 | 2-3 días al mes       |
| 03 | Una vez a la semana   |
| 04 | 2-3 días a la semana  |
| 05 | 4-6 días a la semana  |
| 06 | Una vez al día        |
| 07 | 2-3 veces al día      |
| 08 | 4 veces o mas por día |
| 98 | Se rehúsa a contestar |

B196. ¿Alguna vez has usado tranquilizantes (Diazepam, Valium, Ativan, Restori o Rivotril)?

- |   |                       |
|---|-----------------------|
| 1 | Si                    |
| 0 | No                    |
| 8 | Se rehúsa a contestar |

***If B196 is not equal to 1, then siga con P B204.***

B197. ¿Qué edad tenías la primera vez que usaste tranquilizantes (Diazepam, Valium, Ativan, Restori o Rivotril)?

- |       |                       |
|-------|-----------------------|
| __ __ | años de edad          |
| 98    | Se rehúsa a contestar |

***If B197 is less than B73 or B197 is greater than A1 and B197 is not equal to 98 then LEA: "La respuesta es menor que la edad en que el participante usó drogas por primera vez o supera la edad del participante. Por favor revise la respuesta." and siga con P B197.***



B198. ¿Alguna vez te has inyectado tranquilizantes (Diazepam, Valium, Ativan, Restori o Rivotril)?

- 1 Si
- 0 No
- 8 Se rehúsa a contestar

*If B198 is not equal to 1, then siga con P B200.*

B199. ¿Qué edad tenías la primera vez que te inyectaste tranquilizantes (Diazepam, Valium, Ativan Restori o Rivotril)?

- años de edad
- 98 Se rehúsa a contestar

*If B199 is less than B76 or B199 is greater than A1 and B199 is not equal to 98 then LEA: "La respuesta es menor que la edad en que el participante se inyecta drogas por primera vez o supera la edad del participante. Por favor revise la respuesta." and siga con P B199.*

B200. Si usaste tranquilizantes (Diazepam, Valium, Ativan, Restori o Rivotril) en los últimos 6 meses cuando estuviste en [LCOUNTRY], ¿Cómo los usaste?

**Entrevistador: Si el participante indica que no usó tranquilizantes en [LCOUNTRY] en los últimos 6 meses, marque No corresponde.**

(Marque todas las que apliquen)

- Inyectado
- Fumado (chasing)
- Aspirado
- Inhalado
- Tomado
- Rectal (bumping)
- Otro
- No corresponde
- Se rehúsa a contestar

*If B200 is greater than 1 and B200H is equal to 1 then LEA: "Solo puedes escoger la opcion "No corresponde" por si sola, verificar respuesta." and siga con P B200.*

***If B200G is not equal to 1, then siga con P instrucción antes de B202.***

B201. Especifica de que otra manera has usado tranquilizantes (Diazepam, Valium, Ativan, Restori o Rivotril) en los últimos 6 meses.

-----

***If B200A is not equal to 1, then siga con P instrucción antes de B203.***

B202. Durante los últimos 6 meses, cuando usaste tranquilizantes (Diazepam, Valium, Ativan, Restori o Rivotril) en promedio ¿Qué tan seguido te inyectaste cuando estuviste en [LCOUNTRY]? (Escoja una)

|    |                       |
|----|-----------------------|
| 00 | Nunca                 |
| 01 | 1 vez al mes o menos  |
| 02 | 2-3 días al mes       |
| 03 | Una vez a la semana   |
| 04 | 2-3 días a la semana  |
| 05 | 4-6 días a la semana  |
| 06 | Una vez al día        |
| 07 | 2-3 veces al día      |
| 08 | 4 veces o mas por día |
| 98 | Se rehúsa a contestar |

***If B200H is equal to 1 or B200 is equal to 98, then siga con P B204.***

B203. Durante los últimos 6 meses, cuando usaste tranquilizantes (Diazepam, Valium, Ativan o Restori, Rivotril) en promedio ¿Qué tan seguido los usaste de otras maneras cuando estuviste en [LCOUNTRY]? (Escoja una)

- 00 Nunca
- 01 1 vez al mes o menos
- 02 2-3 días al mes
- 03 Una vez a la semana
- 04 2-3 días a la semana
- 05 4-6 días a la semana
- 06 Una vez al día
- 07 2-3 veces al día
- 08 4 veces o mas por día
- 98 Se rehúsa a contestar

B204. ¿Alguna vez haz usado barbitúricos (Amytal, Nembutal, o Seconal)?

- 1 Si
- 0 No
- 8 Se rehúsa a contestar

***If B204 is not equal to 1, then siga con P B212.***

B205. ¿Qué edad tenías la primera vez que usaste barbitúricos (Amytal, Nembutal, o Seconal)?

- \_\_ \_\_ años de edad
- 98 Se rehúsa a contestar

***If B205 is less than B73 or B205 is greater than A1 and B205 is not equal to 98 then LEA: "La respuesta es menor que la edad en que el participante usó drogas por primera vez o supera la edad del participante. Por favor revise la respuesta." and siga con P B205.***

B206. ¿Alguna vez te has inyectado barbitúricos (Amytal, Nembutal, o Seconal)?

- 1 Si  
0 No  
8 Se rehúsa a contestar

*If B206 is not equal to 1, then siga con P B208.*

B207. ¿Qué edad tenías la primera vez que te inyectaste barbitúricos (Amytal, Nembutal, o Seconal)?

- años de edad  
98 Se rehúsa a contestar

*If B207 is less than B76 or B207 is greater than A1 and B207 is not equal to 98 then LEA: "La respuesta es menor que la edad en que el participante se inyecta drogas por primera vez o supera la edad del participante. Por favor revise la respuesta." and siga con P B207.*

B208. Si usaste barbitúricos (Amytal, Nembutal, o Seconal) en los últimos 6 meses mientras estuviste en [LCOUNTRY], ¿Cómo los usaste?

**Entrevistador: Si el participante indica que no usó barbitúricos en [LCOUNTRY] en los últimos 6 meses, marque No corresponde.**

(Marque todas las que apliquen)

- Inyectado  
— Fumado (chasing)  
— Aspirado  
— Inhalado  
— Tomado  
— Rectal (bumping)  
— Otro  
— No corresponde  
— Se rehúsa a contestar

*If B208 is greater than 1 and B208H is equal to 1 then LEA: "Solo puedes escoger la opcion "No corresponde" por si sola, verificar respuesta." and siga con P B208.*

***If B208G is not equal to 1, then siga con P instrucción antes de B210.***

B209. Especifica de que otra manera usaste barbitúricos (Amytal, Nembutal, o Seconal) en los últimos 6 meses.

-----

***If B208A is not equal to 1, then siga con P instrucción antes de B211.***

B210. Durante los últimos 6 meses, cuando usaste barbitúricos (Amytal, Nembutal, o Seconal) cuando estuviste en [LCOUNTRY], en promedio ¿Qué tan seguido te los inyectaste? (Escoja una)

|    |                       |
|----|-----------------------|
| 00 | Nunca                 |
| 01 | 1 vez al mes o menos  |
| 02 | 2-3 días al mes       |
| 03 | Una vez a la semana   |
| 04 | 2-3 días a la semana  |
| 05 | 4-6 días a la semana  |
| 06 | Una vez al día        |
| 07 | 2-3 veces al día      |
| 08 | 4 veces o mas por día |
| 98 | Se rehúsa a contestar |

***If B208H is equal to 1 or B208 is equal to 98, then siga con P B212.***

B211. Durante los últimos 6 meses, cuando usaste barbitúricos (Amytal, Nembutal, o Seconal) cuando estuviste en [LCOUNTRY], en promedio ¿Qué tan seguido lo usaste de otra manera (no inyectada)? (Escoja una)

- 00 Nunca
- 01 1 vez al mes o menos
- 02 2-3 días al mes
- 03 Una vez a la semana
- 04 2-3 días a la semana
- 05 4-6 días a la semana
- 06 Una vez al día
- 07 2-3 veces al día
- 08 4 veces o mas por día
- 98 Se rehúsa a contestar

B212. ¿Alguna vez has usado píldoras del cerebro (nootropicos, modafilino, ritalin)?

- 1 Si
- 0 No
- 8 Se rehúsa a contestar

*If B212 is not equal to 1, then siga con P B220.*

B213. ¿Qué edad tenías la primera vez que usaste píldoras del cerebro (nootropicos, modafilino, ritalin)?

- \_\_\_ años de edad
- 98 Se rehúsa a contestar

*If B213 is less than B73 or B213 is greater than A1 and B213 is not equal to 98 then LEA: "La respuesta es menor que la edad en que el participante usó drogas por primera vez o supera la edad del participante. Por favor revise la respuesta." and siga con P B213.*

B214. ¿Alguna vez te has inyectado píldoras del cerebro (nootropicos, modafilino, ritalin)?

- 1 Si
- 0 No
- 8 Se rehúsa a contestar

*If B214 is not equal to 1, then siga con P B216.*

B215. ¿Qué edad tenías la primera vez que te inyectaste píldoras del cerebro (nootropicos, modafilino, ritalin)?

- años de edad
- 98 Se rehúsa a contestar

*If B215 is less than B76 or B215 is greater than A1 and B215 is not equal to 98 then LEA: "La respuesta es menor que la edad en que el participante se inyecta drogas por primera vez o supera la edad del participante. Por favor revise la respuesta." and siga con P B215.*

B216. Si usaste píldoras del cerebro (nootropicos, modafilino, ritalin) en los últimos 6 meses cuando estuviste en [LCOUNTRY], ¿Cómo los usaste?

**Entrevistador: Si el participante indica que no usó píldoras del cerebro en [LCOUNTRY] en los últimos 6 meses, marque No corresponde.**

(Marque todas las que apliquen)

- Inyectado
- Fumado (chasing)
- Aspirado
- Inhalado
- Tomado
- Rectal (bumping)
- Otro
- No corresponde
- Se rehúsa a contestar

*If B216 is greater than 1 and B216H is equal to 1 then LEA: "Solo puedes escoger la opcion "No corresponde" por si sola, verificar respuesta." and siga con P B216.*

***If B216G is not equal to 1, then siga con P instrucción antes de B218.***

B217. Especifica otras maneras en las que usaste píldoras del cerebro (nootropicos, modafilino, ritalin) en los últimos 6 meses.

-----

***If B216A is not equal to 1, then siga con P instrucción antes de B219.***

B218. En los últimos 6 meses, cuando usaste píldoras del cerebro (nootropicos, modafilino, ritalin) en [LCOUNTRY], en promedio ¿Qué tan seguido te inyectabas? (Escoja una)

- |    |                       |
|----|-----------------------|
| 00 | Nunca                 |
| 01 | 1 vez al mes o menos  |
| 02 | 2-3 días al mes       |
| 03 | Una vez a la semana   |
| 04 | 2-3 días a la semana  |
| 05 | 4-6 días a la semana  |
| 06 | Una vez al día        |
| 07 | 2-3 veces al día      |
| 08 | 4 veces o mas por día |
| 98 | Se rehúsa a contestar |

***If B216H is equal to 1 or B216 is equal to 98, then siga con P B220.***



B219. En los últimos 6 meses, cuando usaste píldoras del cerebro (nootropicos, modafilino, ritalin) en [LCOUNTRY], en promedio ¿Qué tan seguido las usaste de otra manera (no inyectada)? (Escoja una)

- 00 Nunca
- 01 1 vez al mes o menos
- 02 2-3 días al mes
- 03 Una vez a la semana
- 04 2-3 días a la semana
- 05 4-6 días a la semana
- 06 Una vez al día
- 07 2-3 veces al día
- 08 4 veces o mas por día
- 98 Se rehúsa a contestar

B220. ¿Alguna vez has usado otra droga sola (no mencionada anteriormente)? **Entrevistador, por favor pregunte sobre sales de baño**

- 1 Si
- 0 No
- 8 Se rehúsa a contestar

*If B220 is not equal to 1, then siga con P B238.*

B221. Por favor especifica que otra droga has usado sola.

-----  
-----

B222. ¿Qué edad tenías la primera vez que usaste [Respuesta a P B221] sola?

- \_\_ \_\_ años de edad
- 98 Se rehúsa a contestar



***If B225 is greater than 1 and B225H is equal to 1 then LEA: "Solo puedes escoger la opcion "No corresponde" por si sola, verificar respuesta." and siga con P B225.***

***If B225G is not equal to 1, then siga con P instrucción antes de B227.***

B226. Especifica de que otra manera usaste [Respuesta a P B221] en los últimos 6 meses.

-----

***If B225A is not equal to 1, then siga con P instrucción antes de B228.***

B227. Durante los últimos 6 meses, cuando usaste [Respuesta a P B221] cuando estuviste en [LCOUNTRY], en promedio ¿Qué tan seguido te la inyectaste? (Escoja una)

- 00 Nunca
- 01 1 vez al mes o menos
- 02 2-3 días al mes
- 03 Una vez a la semana
- 04 2-3 días a la semana
- 05 4-6 días a la semana
- 06 Una vez al día
- 07 2-3 veces al día
- 08 4 veces o mas por día
- 98 Se rehúsa a contestar

***If B225H is equal to 1 or B225 is equal to 98, then siga con P B229.***

B228. Durante los últimos 6 meses, cuando usaste [Respuesta a P B221] cuando estuviste en [LCOUNTRY], en promedio ¿Qué tan seguido lo usaste de otra manera (no inyectada)? (Escoja una)

- 00 Nunca
- 01 1 vez al mes o menos
- 02 2-3 días al mes
- 03 Una vez a la semana
- 04 2-3 días a la semana
- 05 4-6 días a la semana
- 06 Una vez al día
- 07 2-3 veces al día
- 08 4 veces o mas por día
- 98 Se rehúsa a contestar

B229. ¿Alguna vez has usado otra droga sola (no mencionada anteriormente)?

- 1 Si
- 0 No
- 8 Se rehúsa a contestar

***If B229 is not equal to 1, then siga con P B238.***

B230. Por favor especifica otra droga que has usado sola.

-----

B231. ¿Qué edad tenías la primera vez que usaste [Respuesta a P B230] sola?

- \_\_\_ años de edad
- 98 Se rehúsa a contestar



***If B234 is greater than 1 and B234H is equal to 1 then LEA: "Solo puedes escoger la opcion "No corresponde" por si sola, verificar respuesta." and siga con P B234.***

***If B234G is not equal to 1, then siga con P instrucción antes de B236.***

B235. Especifica de que otra manera usaste [Respuesta a P B230] en los últimos 6 meses.

-----

***If B234A is not equal to 1, then siga con P instrucción antes de B237.***

B236. Durante los últimos 6 meses, cuando usaste [Respuesta a P B230] cuando estuviste en [LCOUNTRY], en promedio ¿Qué tan seguido te lo inyectaste? (Escoja una)

- 00 Nunca
- 01 1 vez al mes o menos
- 02 2-3 días al mes
- 03 Una vez a la semana
- 04 2-3 días a la semana
- 05 4-6 días a la semana
- 06 Una vez al día
- 07 2-3 veces al día
- 08 4 veces o mas por día
- 98 Se rehúsa a contestar

***If B234H is equal to 1 or B234 is equal to 98, then siga con P B238.***

B237. Durante los últimos 6 meses, cuando usaste [Respuesta a P B230] cuando estuviste en [LCOUNTRY], en promedio ¿Qué tan seguido lo usaste de otra manera (no inyectada)? (Escoja una)

- 00 Nunca
- 01 1 vez al mes o menos
- 02 2-3 días al mes
- 03 Una vez a la semana
- 04 2-3 días a la semana
- 05 4-6 días a la semana
- 06 Una vez al día
- 07 2-3 veces al día
- 08 4 veces o mas por día
- 98 Se rehúsa a contestar

B238. ¿Alguna vez has usado otra combinación de droga (no mencionada anteriormente)?

- 1 Si
- 0 No
- 8 Se rehúsa a contestar

***If B238 is not equal to 1, then siga con P instrucción antes de B256.***

B239. Por favor especifica otra combinación de droga has usado.

-----

B240. ¿Qué edad tenías la primera vez que usaste [Respuesta a P B239]?

- \_\_\_ años de edad
- 98 Se rehúsa a contestar





***If B243 is greater than 1 and B243H is equal to 1 then LEA: "Solo puedes escoger la opcion "No corresponde" por si sola, verificar respuesta." and siga con P B243.***

***If B243G is not equal to 1, then siga con P instrucción antes de B245.***

B244. Especifica de que otra manera usaste [Respuesta a P B239] en los últimos 6 meses.

-----

***If B243A is not equal to 1, then siga con P instrucción antes de B246.***

B245. Durante los últimos 6 meses, cuando usaste [Respuesta a P B239] cuando estuviste en [LCOUNTRY], en promedio ¿Qué tan seguido te los inyectaste? (Escoja una)

|    |                       |
|----|-----------------------|
| 00 | Nunca                 |
| 01 | 1 vez al mes o menos  |
| 02 | 2-3 días al mes       |
| 03 | Una vez a la semana   |
| 04 | 2-3 días a la semana  |
| 05 | 4-6 días a la semana  |
| 06 | Una vez al día        |
| 07 | 2-3 veces al día      |
| 08 | 4 veces o mas por día |
| 98 | Se rehúsa a contestar |

***If B243H is equal to 1 or B243 is equal to 98, then siga con P B247.***

B246. Durante los últimos 6 meses, cuando usaste [Respuesta a P B239] cuando estuviste en [LCOUNTRY], en promedio ¿Qué tan seguido lo usaste de otra manera (no inyectada)? (Escoja una)

- 00 Nunca
- 01 1 vez al mes o menos
- 02 2-3 días al mes
- 03 Una vez a la semana
- 04 2-3 días a la semana
- 05 4-6 días a la semana
- 06 Una vez al día
- 07 2-3 veces al día
- 08 4 veces o mas por día
- 98 Se rehúsa a contestar

B247. ¿Alguna vez has usado otra droga sola (no mencionada anteriormente)?

- 1 Si
- 0 No
- 8 Se rehúsa a contestar

***If B247 is not equal to 1, then siga con P instrucción antes de B256.***

B248. Por favor especifica otra droga que has usado sola.

-----

B249. ¿Qué edad tenías la primera vez que usaste [Respuesta a P B248]?

- \_\_\_ años de edad
- 98 Se rehúsa a contestar



***If B252 is greater than 1 and B252H is equal to 1 then LEA: "Solo puedes escoger la opcion "No corresponde" por si sola, verificar respuesta." and siga con P B252.***

***If B252G is not equal to 1, then siga con P instrucción antes de B254.***

B253. Por favor, especifica de que otra manera usaste [Respuesta a P B248] en los últimos 6 meses.

-----

***If B252A is not equal to 1, then siga con P instrucción antes de B255.***

B254. Durante los últimos 6 meses, cuando usaste [Respuesta a P B248] cuando estuviste en [LCOUNTRY], en promedio ¿Qué tan seguido te los inyectaste? (Escoja una)

|    |                       |
|----|-----------------------|
| 00 | Nunca                 |
| 01 | 1 vez al mes o menos  |
| 02 | 2-3 días al mes       |
| 03 | Una vez a la semana   |
| 04 | 2-3 días a la semana  |
| 05 | 4-6 días a la semana  |
| 06 | Una vez al día        |
| 07 | 2-3 veces al día      |
| 08 | 4 veces o mas por día |
| 98 | Se rehúsa a contestar |

***If B252H is equal to 1 or B252 is equal to 98, then siga con P instrucción antes de B256.***

B255. Durante los últimos 6 meses, cuando usaste [Respuesta a P B248] cuando estuviste en [LCOUNTRY], en promedio ¿Qué tan seguido lo usaste de otra manera (no inyectada)? (Escoja una)

|    |                       |
|----|-----------------------|
| 00 | Nunca                 |
| 01 | 1 vez al mes o menos  |
| 02 | 2-3 días al mes       |
| 03 | Una vez a la semana   |
| 04 | 2-3 días a la semana  |
| 05 | 4-6 días a la semana  |
| 06 | Una vez al día        |
| 07 | 2-3 veces al día      |
| 08 | 4 veces o mas por día |
| 98 | Se rehúsa a contestar |

***ANYINJ6M = If(B92 is not equal to 0 and B92 is not equal to 98 and B92 is not equal to "Salto" or B106 is not equal to 0 and B106 is not equal to 98 and B106 is not equal to "Salto" or B109 is not equal to 0 and B109 is not equal to 98 and B109 is not equal to "Salto" or B117 is not equal to 0 and B117 is not equal to 98 and B117 is not equal to "Salto" or B124 is not equal to 0 and B124 is not equal to 98 and B124 is not equal to "Salto" or B127 is not equal to 0 and B127 is not equal to 98 and B127 is not equal to "Salto" or B136 is not equal to 0 and B136 is not equal to 98 and B136 is not equal to "Salto" or B139 is not equal to 0 and B139 is not equal to 98 and B139 is not equal to "Salto" or B146 is not equal to 0 and B146 is not equal to 98 and B146 is not equal to "Salto" or B153 is not equal to 0 and B153 is not equal to 98 and B153 is not equal to "Salto" or B164 is not equal to 0 and B164 is not equal to 98 and B164 is not equal to "Salto" or B172 is not equal to 0 and B172 is not equal to 98 and B172 is not equal to "Salto" or B180 is not equal to 0 and B180 is not equal to 98 and B180 is not equal to "Salto" or B188 is not equal to 0 and B188 is not equal to 98 and B188 is not equal to "Salto" or B202 is not equal to 0 and B202 is not equal to 98 and B202 is not equal to "Salto" or B210 is not equal to 0 and B210 is not equal to 98 and B210 is not equal to "Salto" or B218 is not equal to 0 and B218 is not equal to 98 and B218 is not equal to "Salto" or B227 is not equal to 0 and B227 is not equal to 98 and B227 is not equal to "Salto" or B236 is not equal to 0 and B236 is not equal to 98 and B236 is not equal to "Salto" or B245 is not equal to 0 and B245 is not equal to 98 and B245 is not equal to "Salto" or B254 is not equal to 0 and B254 is not equal to 98 and B254 is not equal to "Salto", 1, 0)***

*If ANYINJ6M is equal to 0 then LEA: "El resumen de respuestas a las preguntas sobre drogas descalifican al/la participante de inscribirse al estudio. Por favor verificar respuestas al verificar cada pregunta sobre drogas de nuevo."  
" and siga con P B86.*

*LEA: ENTREVISTADOR LEA AL PARTICIPANTE: Las siguientes preguntas tienen que ver con inyectarse y comportamiento de compartir. Yo sé que te pregunte antes pero, me podrías recordar...*

B256. Durante los últimos 6 meses, en promedio en [LCOUNTRY]? ¿Qué tan seguido te inyectaste cualquier droga o combinación de drogas? (Escoja una)

- |    |                       |
|----|-----------------------|
| 01 | 1 vez al mes o menos  |
| 02 | 2-3 días al mes       |
| 03 | Una vez a la semana   |
| 04 | 2-3 días a la semana  |
| 05 | 4-6 días a la semana  |
| 06 | Una vez al día        |
| 07 | 2-3 veces al día      |
| 08 | 4 veces o mas por día |
| 98 | Se rehúsa a contestar |

B257. De las veces que se inyectó en los **últimos 6 meses cuando estuviste** en [LCOUNTRY], ¿qué tan seguido le dio, rentó, prestó a alguien una jeringa que usted ya había usado? (Escoja una)

- |   |                                |
|---|--------------------------------|
| 1 | Nunca                          |
| 2 | A veces                        |
| 3 | Casi la mitad de las ocasiones |
| 4 | Seguido                        |
| 5 | Siempre                        |
| 8 | Se rehúsa a contestar          |

B258. De las veces que se inyectó en los **últimos 6 meses cuando estuviste** en [LCOUNTRY], ¿qué tan seguido uso una jeringa que usted sabía o sospechaba que alguien más ya la había usado? (Escoja una)

- |   |                                |
|---|--------------------------------|
| 1 | Nunca                          |
| 2 | A veces                        |
| 3 | Casi la mitad de las ocasiones |
| 4 | Seguido                        |
| 5 | Siempre                        |
| 8 | Se rehúsa a contestar          |

*If B258 is equal to 1 or B258 is equal to 8, then siga con P B261.*

B259. Durante la última vez que se inyectó drogas en [LCOUNTRY], ¿uso una jeringa que usted sabía o sospechaba hubiera sido usada por alguien más?

- |   |                       |
|---|-----------------------|
| 1 | Si                    |
| 0 | No                    |
| 8 | Se rehúsa a contestar |

B260. De las veces en los **últimos 6 meses** que se inyectó en [LCOUNTRY] con una jeringa que ya había sido usada por alguien más, ¿qué tan seguido limpió la jeringa con cloro antes de usarla? (Escoja una)

- |   |                              |
|---|------------------------------|
| 1 | Nunca                        |
| 2 | Menos de la mitad del tiempo |
| 3 | Casi la mitad del tiempo     |
| 4 | Más de la mitad del tiempo   |
| 5 | Siempre                      |
| 8 | Se rehúsa a contestar        |

B261. De las veces que se inyectó en [LCOUNTRY] con otras personas en los **últimos 6 meses**, ¿qué tan seguido ha dividido drogas con alguien más usando una jeringa? Esto también es conocido como backloading, piggybacking o dividir drogas mojadas. (Escoja una)

- 1 Nunca
- 2 Menos de la mitad del tiempo
- 3 Casi la mitad del tiempo
- 4 Más de la mitad del tiempo
- 5 Siempre
- 8 Se rehúsa a contestar

B262. De las veces que se inyectó en los **últimos 6 meses mientras estuvo** en [LCOUNTRY], ¿qué tan seguido usó un cacharro, algodón o agua de enjuague con alguien o después que alguien más ya lo había usado? (Escoja una)

- 1 Nunca
- 2 Menos de la mitad del tiempo
- 3 Casi la mitad del tiempo
- 4 Más de la mitad del tiempo
- 5 Siempre
- 8 Se rehúsa a contestar

B263. De las veces que se inyectó en los **últimos 6 meses mientras estuviste** en [LCOUNTRY], ¿qué tan seguido compró drogas que ya venían preparadas en la jeringa? (Escoja una)

- 1 Nunca
- 2 Menos de la mitad del tiempo
- 3 Casi la mitad del tiempo
- 4 Más de la mitad del tiempo
- 5 Siempre
- 8 Se rehúsa a contestar



B264. De las veces que se inyectó en los **últimos 6 meses mientras estuviste** en [LCOUNTRY], ¿qué tan seguido se inyectó con una jeringa nueva, estéril? (Escoja una)

- 1 Nunca
- 2 Menos de la mitad del tiempo
- 3 Casi la mitad del tiempo
- 4 Más de la mitad del tiempo
- 5 Siempre
- 8 Se rehúsa a contestar

B265. En los últimos 6 meses que se inyectó drogas mientras estuvo en [LCOUNTRY], ¿dónde consiguió la jeringa que Ud. uso para inyectarse drogas? (Marque todas las que apliquen)

- Farmacia
- Esposo (a), familiar, o pareja sexual
- Amigo (a)
- Conocido/desconocido
- Un Traficante
- Doctor que ayuda a inyectarse a cambio de drogas o dinero
- Picadero
- Intercambio de Jeringas (usted lo cambió)
- De alguien que los obtiene de un intercambio de Jeringas
- Comprada en la calle
- Doctor / clínica / hospital
- Clínica Veterinaria/ tienda de mascotas
- Mercado/Tienda
- Encontrada en el suelo o la basura
- Otro lugar
- Se rehúsa a contestar

***If B265O is equal to 1 then siga con P B266***

***If not, then siga con P instrucción antes de B267.***

B266. Por favor especifique en qué otro lugar usted consiguió las jeringas en los últimos 6 meses.

-----

***If B265A + B265B + B265C + B265D + B265E + B265F + B265G + B265H + B265I + B265J + B265K + B265L + B265M + B265N + B265O is not equal to 1 then siga con P B267***

***If not, then siga con P instrucción antes de B269.***

B267. En los últimos 6 meses mientras estuvo en [LCOUNTRY], ¿dónde consiguió sus jeringas más seguido? (Escoja una)

- |    |                                                           |
|----|-----------------------------------------------------------|
| 01 | Farmacia                                                  |
| 02 | Esposo (a), familiar, o pareja sexual                     |
| 03 | Amigo (a)                                                 |
| 04 | Conocido/desconocido                                      |
| 05 | Un Traficante                                             |
| 06 | Doctor que ayuda a inyectarse a cambio de drogas o dinero |
| 07 | Picadero                                                  |
| 08 | Intercambio de Jeringas (usted lo cambió)                 |
| 09 | De alguien que los obtiene de un intercambio de Jeringas  |
| 10 | Comprada en la calle                                      |
| 11 | Doctor / clínica / hospital                               |
| 12 | Clínica Veterinaria/ tienda de mascotas                   |
| 13 | Mercado/Tienda                                            |
| 14 | Encontrada en el suelo o la basura                        |
| 15 | Otro lugar                                                |
| 98 | Se rehúsa a contestar                                     |

***If B267 is equal to 1 and B265A is not equal to 1 or B267 is equal to 2 and B265B is not equal to 1 or B267 is equal to 3 and B265C is not equal to 1 or B267 is equal to 4 and B265D is not equal to 1 or B267 is equal to 5 and B265E is not equal to 1 or B267 is equal to 6 and B265F is not equal to 1 or B267 is equal to 7 and B265G is not equal to 1 or B267 is equal to 8 and B265H is not equal to 1 or B267 is equal to 9 and B265I is not equal to 1 or B267 is equal to 10 and B265J is not equal to 1 or B267 is equal to 11 and B265K is not equal to 1 or B267 is equal to 12 and B265L is not equal to 1 or B267 is equal to 13 and B265M is not equal to 1 or B267 is equal to 14 and B265N is not equal to 1 or B267 is equal to 15 and B265O is not equal to 1 then LEA: "El participante solo puede elegir el lugar con más frecuencia de entre los lugares nombrados anteriormente." and siga con P B267.***

***If B267 is equal to 15 then siga con P B268***

***If not, then siga con P instrucción antes de B269.***

B268. Por favor especifique en qué lugar usted consiguió sus jeringas más seguido, en los últimos 6 meses.

-----

***If B267 is equal to 1 or B267 is equal to 8 then siga con P B269***

***If not, then siga con P instrucción antes de B271.***

B269. En los últimos 6 meses, cuando estuviste en [LCOUNTRY], ¿cuántas jeringas estériles y limpias obtenías por visita al intercambio de jeringas en promedio?

-----

998 Se rehúsa a contestar

***If B269 is equal to 0 or B269 is equal to 998, then siga con P instrucción antes de B271.***

B270. ¿Cuál es el nombre del programa de intercambio de jeringa de donde obtuviste tus jeringas mas seguido?

-----

***If B265A is equal to 1 or B267 is equal to 1 then siga con P B271***

***If not, then siga con P B273.***

B271. En los últimos 6 meses, cuando estuviste en [LCOUNTRY], ¿cuántas jeringas estériles y limpias obtuviste en cada visita a la farmacia en promedio?

-----

998 Se rehúsa a contestar

***If B271 is equal to 0 or B271 is equal to 998, then siga con P B273.***

B272. ¿Cuál es el nombre de la farmacia en la que compraste jeringas mas seguido?

-----

B273. En los últimos 6 meses mientras estuvo en [LCOUNTRY], cuando se inyectaba drogas ¿qué tan difícil o fácil fue conseguir jeringas nuevas, que no han sido usadas? (Escoja una)

- 1 Nunca ha tratado de conseguir jeringas nuevas que no han sido usadas
- 2 Bastante fácil
- 3 Fácil
- 4 Difícil
- 5 Bastante difícil
- 8 Se rehúsa a contestar

*If B273 is equal to 4 or B273 is equal to 5 then siga con P B274*

*If not, then siga con P instrucción antes de B275.*

B274. ¿Cuál fue la razón principal por la que fue difícil conseguir jeringas nuevas, que no han sido usadas mientras estuvo en [LCOUNTRY]? (Escoja una)

- 1 Cuestan demasiado/ No tengo dinero para comprarlas
- 2 No hay ningún sitio donde comprar jeringas legalmente/ la tienda no me los vende a mi
- 3 No hay ningún lugar de intercambio de jeringas
- 4 Me da miedo que me encuentren /arresten la policía por llevar jeringas
- 5 La farmacia/tienda estaba cerrada
- 6 Otro
- 7 No sé
- 8 Se rehúsa a contestar

*If B274 is equal to 6 then siga con P B275*

*If not, then siga con P B276.*

B275. Por favor especifique cuál fue la otra razón por la cual fue difícil conseguir jeringas nuevas, que no han sido usadas.

-----

B276. Mientras estuvo en [LCOUNTRY], ¿le ha pedido ayuda a alguien como a un "doctor" para ayudarle a inyectarse? **(alguien que le ayuda a inyectarse a cambio de drogas o dinero)**

- |   |                       |
|---|-----------------------|
| 1 | Si                    |
| 0 | No                    |
| 7 | No sé                 |
| 8 | Se rehúsa a contestar |

*If B276 is not equal to 1, then siga con P instrucción antes de B281.*

B277. ¿Cuándo fue la última vez que alguien, como un "doctor", le ayudó a inyectarse drogas en [LCOUNTRY]?

- |          |                               |
|----------|-------------------------------|
| __ __ __ | MESES                         |
| __ __ __ | SEMANAS                       |
| __ __ __ | DÍAS                          |
| 998      | Se rehúsa a contestar (Meses) |

*If B277 is greater than A1 and B277 is not equal to 998 then LEA: "La respuesta supera la edad del participante. Por favor verificar respuesta." and siga con P B277.*

*If B277 is greater than 6 and B277 is not equal to 98, then siga con P instrucción antes de B281.*

B278. En los últimos 6 meses cuando estuvo en [LCOUNTRY], ¿qué tan seguido se ha inyectado con la ayuda de alguien? (Escoja una)

- |   |                       |
|---|-----------------------|
| 1 | Siempre               |
| 2 | Con frecuencia        |
| 3 | A veces               |
| 4 | Casi nunca            |
| 8 | Se rehúsa a contestar |

B279. En los ultimos 6 meses, cuando alguien te ayudo a inyectarte, ¿en qué países ocurrió?  
(Marque todas las que apliquen)

- EUA
- Mexico
- Otro
- Se rehúsa a contestar

*If B279C is not equal to 1, then siga con P instrucción antes de B281.*

B280. Especifique en qué otro pais

-----

**SECCION C: USO DE DROGAS**

**LEA: ENTREVISTADOR LEA:** *En la siguiente sección vamos a hablar sobre el precio, pureza y disponibilidad de drogas en las calles y si ha habido cambios en [LCITY]. Te preguntaremos sobre drogas específicas y vamos a hablar sobre precios primero y luego sobre la pureza y al final sobre la disponibilidad. Te voy a preguntar sobre drogas específicas y me gustaría que me proporciones tu opinión aunque no hayas usado alguna droga en específico.*

**B281. Por favor selecciona el tipo de moneda con la que sabes el precio la/las droga/s**  
(Escoja una)

- 1 Pesos
- 2 Dolares Estadunidenses
- 8 Se rehúsa a contestar

*If B281 is equal to 2 then siga con P B282*

*If not, then siga con P instrucción antes de B297.*

**B282. En dólares: ¿Cuánto cuesta comprar una dosis de Heroína en goma sola en [LCITY]?**

- — — dollars
- 997 No sé
- 998 Se rehúsa a contestar

**B283. En dólares: ¿Cuánto cuesta comprar una dosis de Heroína en polvo sola en el condado de [LCITY]?**

- — — dollars
- 997 No sé
- 998 Se rehúsa a contestar

**B284. En dólares: ¿Cuánto cuesta comprar una dosis de Crack sola en [LCITY]?**

- — — dollars
- 997 No sé
- 998 Se rehúsa a contestar



B285. En dólares: ¿Cuánto cuesta comprar una dosis de Cocaína (polvo) sola en [LCITY]?

- — — dollars
- 997 No sé
- 998 Se rehúsa a contestar

B286. En dólares: ¿Cuánto cuesta comprar una dosis de Heroína y cocaína juntas (speedball) en [LCITY]?

- — — dollars
- 997 No sé
- 998 Se rehúsa a contestar

B287. En dólares: ¿Cuánto cuesta comprar una dosis de Metanfetamina/cristal sola en [LCITY]?

- — — dollars
- 997 No sé
- 998 Se rehúsa a contestar

B288. En dólares: ¿Cuánto cuesta comprar una dosis de China White en [LCITY]?

- — — dollars
- 997 No sé
- 998 Se rehúsa a contestar

B289. En dólares: ¿Cuánto cuesta comprar una dosis de OxyContin, sin receta en [LCITY]?

- — — dollars
- 997 No sé
- 998 Se rehúsa a contestar

B290. En dólares: ¿Cuánto cuesta comprar una dosis de Otros opiáceos (medicamentos controlados sin receta (Vicodin, Darvon, Percocet) en [LCITY]?

- — — dollars
- 997 No sé
- 998 Se rehúsa a contestar

B291. En dólares: ¿Cuánto cuesta comprar una dosis de Tranquilizantes (Rivotril, Diazepam, Valium, Ativan o Restoril) en [LCITY]?

- — — dollars
- 997 No sé
- 998 Se rehúsa a contestar

B292. En dólares: ¿Cuánto cuesta comprar una dosis de Barbitúricos sin receta (Amytal, Nembutal y Seconal) en [LCITY]?

- — — dollars
- 997 No sé
- 998 Se rehúsa a contestar

B293. En dólares: ¿Cuánto cuesta comprar una dosis de Fentanilo (Fentanyl) en [LCITY]?

- — —
- 997 No sé
- 998 Se rehúsa a contestar

B294. ¿Conoce el costo en dólares de Otras drogas o combinaciones que no se haya mencionado en la lista anterior en [LCITY]?

- 1 Si
- 0 No
- 8 Se rehúsa a contestar

***If B294 is not equal to 1, then siga con P instrucción antes de B297.***

B295. En dólares: ¿Cuánto cuesta comprar una dosis de Otras drogas o combinaciones que no se haya mencionado en la lista anterior en [LCITY]?

|       |                       |
|-------|-----------------------|
| — — — | dollars               |
| 997   | No sé                 |
| 998   | Se rehúsa a contestar |

***If B295 is greater than 0 and B295 is not equal to 998 then siga con P B296***

***If not, then siga con P instrucción antes de B297.***

B296. Alguna otra droga o combinación de drogas para la que menciono un costo anteriormente.

-----

***If B281 is equal to 1 then siga con P B297***

***If not, then siga con P B312.***

B297. En pesos: ¿Cuánto cuesta comprar una dosis de Heroína en goma sola en [LCITY]?

|       |                       |
|-------|-----------------------|
| — — — | pesos                 |
| 997   | No sé                 |
| 998   | Se rehúsa a contestar |

B298. En pesos: ¿Cuánto cuesta comprar una dosis de Heroína en polvo sola en [LCITY]?

|       |                       |
|-------|-----------------------|
| — — — | pesos                 |
| 997   | No sé                 |
| 998   | Se rehúsa a contestar |

B299. En pesos: ¿Cuánto cuesta comprar una dosis de Crack sola en [LCITY]?

|       |                       |
|-------|-----------------------|
| — — — | pesos                 |
| 997   | No sé                 |
| 998   | Se rehúsa a contestar |

B300. En pesos: ¿Cuánto cuesta comprar una dosis de Cocaína (polvo) sola en [LCITY]?

|         |                       |
|---------|-----------------------|
| — — — — | pesos                 |
| 9997    | No sé                 |
| 9998    | Se rehúsa a contestar |

B301. En pesos: ¿Cuánto cuesta comprar una dosis de Heroína y cocaína juntas (speedball) en [LCITY]?

|         |                       |
|---------|-----------------------|
| — — — — | pesos                 |
| 9997    | No sé                 |
| 9998    | Se rehúsa a contestar |

B302. En pesos: ¿Cuánto cuesta comprar una dosis de Metanfetamina/cristal sola en [LCITY]?

|         |                       |
|---------|-----------------------|
| — — — — | pesos                 |
| 9997    | No sé                 |
| 9998    | Se rehúsa a contestar |

B303. En pesos: ¿Cuánto cuesta comprar una dosis de China White en [LCITY]?

|         |                       |
|---------|-----------------------|
| — — — — | pesos                 |
| 9997    | No sé                 |
| 9998    | Se rehúsa a contestar |

B304. En pesos: ¿Cuánto cuesta comprar una dosis de OxyContin, sin receta en [LCITY]?

|         |                       |
|---------|-----------------------|
| — — — — | pesos                 |
| 9997    | No sé                 |
| 9998    | Se rehúsa a contestar |

B305. En pesos: ¿Cuánto cuesta comprar una dosis de Otros opiáceos controlados sin receta (Vicodin, Darvon, Percocet) en [LCITY]?

|         |                       |
|---------|-----------------------|
| — — — — | pesos                 |
| 9997    | No sé                 |
| 9998    | Se rehúsa a contestar |

B306. En pesos: ¿Cuánto cuesta comprar una dosis de Tranquilizantes (Rivotril, Diazepam, Valium, Ativan o Restoril)) en [LCITY]?

|         |                       |
|---------|-----------------------|
| — — — — | pesos                 |
| 9997    | No sé                 |
| 9998    | Se rehúsa a contestar |

B307. En pesos: ¿Cuánto cuesta comprar una dosis de Barbitúricos sin receta (Amytal, Nembutal o Seconal) en [LCITY]?

|         |                       |
|---------|-----------------------|
| — — — — | pesos                 |
| 9997    | No sé                 |
| 9998    | Se rehúsa a contestar |

B308. En pesos: ¿Cuánto cuesta comprar una dosis de Fentanilo (Fentanyl) en [LCITY]?

|         |                       |
|---------|-----------------------|
| — — — — | pesos                 |
| 9997    | No sé                 |
| 9998    | Se rehúsa a contestar |

B309. ¿Conoce el costo en pesos de Otras drogas o combinaciones que no se haya mencionado en la lista anterior en [LCITY]?

|   |                       |
|---|-----------------------|
| 1 | Si                    |
| 0 | No                    |
| 8 | Se rehúsa a contestar |

***If B309 is not equal to 1, then siga con P B312.***

B310. En pesos: ¿Cuánto cuesta comprar una dosis de Otras drogas o combinaciones que no se haya mencionado en la lista anterior en [LCITY]?

- — — — pesos
- 9997 No sé
- 9998 Se rehúsa a contestar

*If B310 is greater than 0 and B310 is not equal to 998 then siga con P B311*

*If not, then siga con P B312.*

B311. Alguna otra droga o combinación de drogas para la que menciono un costo anteriormente.

-----

B312. ¿Crees que el precio de la mayoría de drogas de la calle es generalmente más alto o más bajo en Tijuana a comparación de San Diego? (Escoja una)

- 1 Más alto
- 2 Más bajo
- 3 El mismo
- 7 No sé
- 8 Se rehúsa a contestar

B313. ¿Cree que el cierre de la frontera México-Estados Unidos afectó el **precio** de las drogas en San Diego?

- 1 Si
- 0 No
- 7 No sé
- 8 Se rehúsa a contestar

B314. ¿Cree que el cierre de la frontera México-Estados Unidos afectó el **precio** de las drogas en Tijuana?

- 1 Si
- 0 No
- 7 No sé
- 8 Se rehúsa a contestar

B315. En tu opinión, en los últimos 6 meses ¿el precio de la heroína aumento, disminuyo, o se mantuvo igual en [LCITY]? (Escoja una)

- 1 Aumentó
- 2 Dismunuyó
- 3 Se mantuvo igual
- 7 No sé
- 8 Se rehúsa a contestar

B316. En tu opinión, en los últimos 6 meses ¿el precio de metanfetamina aumentó, disminuyó, o se mantuvo igual en [LCITY]? (Escoja una)

- 1 Aumentó
- 2 Dismunuyó
- 3 Se mantuvo igual
- 7 No sé
- 8 Se rehúsa a contestar

B317. En tu opinión, en los últimos 6 meses ¿el precio de cocaína en polvo aumento, disminuyo, o se mantuvo igual en [LCITY]? (Escoja una)

- 1 Aumentó
- 2 Disminuyó
- 3 Se mantuvo igual
- 7 No sé
- 8 Se rehúsa a contestar

B318. En tu opinión, en los últimos 6 meses ¿el precio de cocaína crack aumento, disminuyo, o se mantuvo igual en [LCITY]? (Escoja una)

- 1 Aumentó
- 2 Disminuyó
- 3 Se mantuvo igual
- 7 No sé
- 8 Se rehúsa a contestar

B319. En tu opinión, en los últimos 6 meses ¿el precio de Oxycontin aumento, disminuyo, o se mantuvo igual en [LCITY]? (Escoja una)

- 1 Aumentó
- 2 Disminuyó
- 3 Se mantuvo igual
- 7 No sé
- 8 Se rehúsa a contestar



B320. En tu opinión, en los últimos 6 meses ¿el precio de fentanilo (Fentanyl) aumento, disminuyo, o se mantuvo igual en [LCITY]? (Escoja una)

- 1 Aumentó
- 2 Disminuyó
- 3 Se mantuvo igual
- 7 No sé
- 8 Se rehúsa a contestar

B321. En tu opinión, en los últimos 6 meses ¿el precio de China White aumento, disminuyo, o se mantuvo igual en [LCITY]? (Escoja una)

- 1 Aumentó
- 2 Disminuyó
- 3 Se mantuvo igual
- 7 No sé
- 8 Se rehúsa a contestar

B322. En tu opinión, en los últimos 6 meses ¿el precio de otros opiáceos controlados sin receta aumento, disminuyo, o se mantuvo igual en [LCITY]? (Escoja una)

- 1 Aumentó
- 2 Disminuyó
- 3 Se mantuvo igual
- 7 No sé
- 8 Se rehúsa a contestar

**LEA: LEA: Hay ocasiones en que la pureza de las drogas en la calle cambia. Ahora le voy hacer unas preguntas sobre los cambios que usted podría haber observado en la pureza de las drogas en los últimos 6 meses.**

B323. En tu opinión, en los últimos 6 meses ¿la pureza de heroína aumento, disminuyo, o se mantuvo igual en [LCITY]? (Escoja una)

- 1 Aumentó
- 2 Disminuyó
- 3 Se mantuvo igual
- 7 No sé
- 8 Se rehúsa a contestar

B324. En tu opinión, en los últimos 6 meses ¿la pureza de metanfetaminas aumento, disminuyo, o se mantuvo igual en [LCITY]? (Escoja una)

- 1 Aumentó
- 2 Disminuyó
- 3 Se mantuvo igual
- 7 No sé
- 8 Se rehúsa a contestar

B325. En tu opinión, en los últimos 6 meses ¿la pureza de cocaína en polvo aumento, disminuyo, o se mantuvo igual en [LCITY]? (Escoja una)

- 1 Aumentó
- 2 Disminuyó
- 3 Se mantuvo igual
- 7 No sé
- 8 Se rehúsa a contestar

B326. En tu opinión, en los últimos 6 meses ¿la pureza de cocaína crack aumento, disminuyo, o se mantuvo igual en [LCITY]? (Escoja una)

- 1 Aumentó
- 2 Disminuyó
- 3 Se mantuvo igual
- 7 No sé
- 8 Se rehúsa a contestar

B327. En tu opinión, en los últimos 6 meses ¿la pureza de OxyContin aumento, disminuyo, o se mantuvo igual en [LCITY]? (Escoja una)

- 1 Aumentó
- 2 Disminuyó
- 3 Se mantuvo igual
- 7 No sé
- 8 Se rehúsa a contestar

B328. En tu opinión, en los últimos 6 meses ¿la pureza de fentanilo (Fentanyl) aumento, disminuyo, o se mantuvo igual en [LCITY]? (Escoja una)

- 1 Aumentó
- 2 Disminuyó
- 3 Se mantuvo igual
- 7 No sé
- 8 Se rehúsa a contestar

B329. En tu opinión, en los últimos 6 meses ¿la pureza de China White aumento, disminuyo, o se mantuvo igual en [LCITY]? (Escoja una)

- 1 Aumentó
- 2 Disminuyó
- 3 Se mantuvo igual
- 7 No sé
- 8 Se rehúsa a contestar

B330. En tu opinión, en los últimos 6 meses ¿el precio de otros opiáceos controlados sin receta aumento, disminuyo, o se mantuvo igual en [LCITY]? (Escoja una)

- 1 Aumentó
- 2 Disminuyó
- 3 Se mantuvo igual
- 7 No sé
- 8 Se rehúsa a contestar

B331. ¿Crees que la pureza de drogas es generalmente mejor o peor en Tijuana a comparación de San Diego? (Escoja una)

- 1 Mejor
- 2 Peor
- 3 Igual
- 7 No sé
- 8 Se rehúsa a contestar

B332. ¿Cree que el cierre de la frontera México-Estados Unidos afectó la pureza de las drogas en San Diego?

- 1 Si
- 0 No
- 7 No sé
- 8 Se rehúsa a contestar

***If B332 is not equal to 1, then siga con P B334.***

B333. ¿Cree que el cierre de la frontera México-Estados Unidos hace que la pureza de las drogas en San Diego sea mejor o peor? (Escoja una)

- 1 Mejor
- 2 Peor
- 3 Igual
- 7 No sé
- 8 Se rehúsa a contestar

B334. ¿Cree que el cierre de la frontera México-Estados Unidos afectó la pureza de las drogas en Tijuana?

- 1 Si
- 0 No
- 7 No sé
- 8 Se rehúsa a contestar

***If B334 is not equal to 1, then siga con P instrucción antes de B336.***

B335. ¿Cree que el cierre de la frontera México-Estados Unidos hace que la pureza de las drogas en Tijuana sea mejor o peor? (Escoja una)

- 1 Mejor
- 2 Peor
- 3 Igual
- 7 No sé
- 8 Se rehúsa a contestar

***LEA: ENTREVISTADOR LEA: Ahora, a veces la disponibilidad de drogas en la calle cambia. Así que te hare unas preguntas sobre los cambios que tu hayas podido observar en la disponibilidad de drogas en los últimos 6 meses. Te voy a preguntar sobre algunas drogas en específico y me gustaría tu opinión aunque no hayas usado una de ellas en específico.***

B336. En tu opinión, en los últimos 6 meses, ¿la disponibilidad de heroína ha aumentado, disminuido, o se mantuvo igual en [LCITY]? (Escoja una)

- 1 Aumentó
- 2 Disminuyó
- 3 Se mantuvo igual
- 7 No sé
- 8 Se rehúsa a contestar

B337. En tu opinión, en los últimos 6 meses, ¿la disponibilidad de metanfetamina ha aumentado, disminuido, o se mantuvo igual en [LCITY]? (Escoja una)

- 1 Aumentó
- 2 Disminuyó
- 3 Se mantuvo igual
- 7 No sé
- 8 Se rehúsa a contestar

B338. En tu opinión, en los últimos 6 meses, ¿la disponibilidad de cocaína en polvo ha aumentado, disminuido, o se mantuvo igual en [LCITY]? (Escoja una)

- 1 Aumentó
- 2 Disminuyó
- 3 Se mantuvo igual
- 7 No sé
- 8 Se rehúsa a contestar

B339. En tu opinión, en los últimos 6 meses, ¿la disponibilidad de cocaína crack ha aumentado, disminuido, o se mantuvo igual en [LCITY]? (Escoja una)

- 1 Aumentó
- 2 Disminuyó
- 3 Se mantuvo igual
- 7 No sé
- 8 Se rehúsa a contestar

B340. En tu opinión, en los últimos 6 meses, ¿la disponibilidad de OxyContin ha aumentado, disminuido, o se mantuvo igual en [LCITY]? (Escoja una)

- 1 Aumentó
- 2 Disminuyó
- 3 Se mantuvo igual
- 7 No sé
- 8 Se rehúsa a contestar

B341. En tu opinión, en los últimos 6 meses, ¿la disponibilidad de fentanilo (Fentanyl) ha aumentado, disminuido, o se mantuvo igual en [LCITY]? (Escoja una)

- 1 Aumentó
- 2 Disminuyó
- 3 Se mantuvo igual
- 7 No sé
- 8 Se rehúsa a contestar

B342. En tu opinión, en los últimos 6 meses, ¿la disponibilidad de china white ha aumentado, disminuido, o se mantuvo igual en [LCITY]? (Escoja una)

- 1 Aumentó
- 2 Disminuyó
- 3 Se mantuvo igual
- 7 No sé
- 8 Se rehúsa a contestar

B343. En tu opinión, en los últimos 6 meses, ¿la disponibilidad de otros opiáceos (medicamentos controlados sin receta) ha aumentado, disminuido o se mantuvo igual en [LCITY]? (Escoja una)

- 1 Aumentó
- 2 Disminuyó
- 3 Se mantuvo igual
- 7 No sé
- 8 Se rehúsa a contestar



B344. ¿Crees que la disponibilidad de drogas en general es mejor o peor en Tijuana a comparación de San Diego? (Escoja una)

- 1 Mejor
- 2 Peor
- 3 La misma
- 7 No sé
- 8 Se rehúsa a contestar

B345. ¿Cree que el cierre de la frontera México-Estados Unidos afectó la **disponibilidad** de drogas en San Diego?

- 1 Si
- 0 No
- 7 No sé
- 8 Se rehúsa a contestar

*If B345 is not equal to 1, then siga con P B347.*

B346. ¿Cree que el cierre de la frontera México-Estados Unidos hace que la **disponibilidad** de drogas en San Diego sea mejor o peor? (Escoja una)

- 1 Mejor
- 2 Peor
- 3 La misma
- 7 No sé
- 8 Se rehúsa a contestar

B347. ¿Cree que el cierre de la frontera México-Estados Unidos afectó la **disponibilidad** de drogas en Tijuana?

- 1 Si
- 0 No
- 7 No sé
- 8 Se rehúsa a contestar

*If B347 is not equal to 1, then siga con P B349.*

B348. ¿Cree que el cierre de la frontera México-Estados Unidos hace que la **disponibilidad** de drogas en Tijuana sea mejor o peor? (Escoja una)

- 1 Mejor
- 2 Peor
- 3 La misma
- 7 No sé
- 8 Se rehúsa a contestar

B349. ¿Hay drogas que estaban disponibles antes de la pandemia de COVID que ya no se están vendiendo en **[LCITY]**?

- 1 Si
- 0 No
- 7 No sé
- 8 Se rehúsa a contestar

*If B349 is not equal to 1, then siga con P B364.*

B350. ¿Hay Heroína en goma/Goma negra (la negra) sola que ya no se está vendiendo en el condado de [LCITY]?

- 1 Si
- 0 No
- 7 No sé
- 8 Se rehúsa a contestar

B351. ¿Hay Heroína en polvo sola que ya no se está vendiendo en [LCITY]?

- 1 Si
- 0 No
- 7 No sé
- 8 Se rehúsa a contestar

B352. ¿Hay Cocaína (polvo) sola que ya no se está vendiendo en [LCITY]?

- 1 Si
- 0 No
- 7 No sé
- 8 Se rehúsa a contestar

B353. ¿Hay Heroína y cocaína juntas (speedball) que ya no se está vendiendo en [LCITY]?

- 1 Si
- 0 No
- 7 No sé
- 8 Se rehúsa a contestar

B354. ¿Hay Metanfetamina/cristal sola que ya no se está vendiendo en [LCITY]?

- 1 Si
- 0 No
- 7 No sé
- 8 Se rehúsa a contestar

B355. ¿Hay Crack sola que ya no se está vendiendo en [LCITY]?

- 1 Si
- 0 No
- 7 No sé
- 8 Se rehúsa a contestar

B356. ¿Hay China White que ya no se está vendiendo en [LCITY]?

- 1 Si
- 0 No
- 7 No sé
- 8 Se rehúsa a contestar

B357. ¿Hay OxyContin, sin receta que ya no se está vendiendo en [LCITY]?

- 1 Si
- 0 No
- 7 No sé
- 8 Se rehúsa a contestar

B358. ¿Hay Otros opiáceos controlados sin receta (Vicodin, Darvon, Percocet) que ya no se están vendiendo en [LCITY]?

- 1 Si
- 0 No
- 7 No sé
- 8 Se rehúsa a contestar

B359. ¿Hay Tranquilizantes (Rivotril, Diazepam, Valium, Ativan o Restoril) que ya no se están vendiendo en [LCITY]?

- 1 Si
- 0 No
- 7 No sé
- 8 Se rehúsa a contestar

B360. ¿Hay Barbitúricos sin receta (Amytal, Nembutal o Seconal) que ya no se están vendiendo en [LCITY]?

- 1 Si
- 0 No
- 7 No sé
- 8 Se rehúsa a contestar

B361. ¿Hay Fentanilo que ya no se está vendiendo en el condado de [LCITY]?

- 1 Si
- 0 No
- 7 No sé
- 8 Se rehúsa a contestar

B362. ¿Hay Otras drogas o combinaciones que no se haya mencionado en la lista anterior que ya no se están vendiendo en [LCITY]?

- 1 Si
- 0 No
- 7 No sé
- 8 Se rehúsa a contestar

***If B362 is equal to 1 then siga con P B363***

***If not, then siga con P B364.***

B363. Por favor especifica el nombre de otra droga o combinación de drogas que no se haya mencionado.

-----

B364. ¿Hay algunas drogas o combinación de droga que están disponibles ahora en San Diego, que no estaban disponibles antes de la pandemia de COVID?

- 1 Si
- 0 No
- 7 No sé
- 8 Se rehúsa a contestar

***If B364 is not equal to 1, then siga con P B379.***

B365. ¿Hay Heroína en goma/Goma negra (la negra) sola que ahora está disponible en el condado de [LCITY]?

- 1 Si
- 0 No
- 7 No sé
- 8 Se rehúsa a contestar

B366. ¿Hay Heroína en polvo sola que ahora está disponible en [LCITY]?

- 1 Si
- 0 No
- 7 No sé
- 8 Se rehúsa a contestar

B367. ¿Hay Cocaína (polvo) sola que ahora está disponible en [LCITY]?

- 1 Si
- 0 No
- 7 No sé
- 8 Se rehúsa a contestar

B368. ¿Hay Heroína y cocaína juntas (speedball) que ahora están disponible en [LCITY]?

- 1 Si
- 0 No
- 7 No sé
- 8 Se rehúsa a contestar

B369. ¿Hay Metanfetamina/cristal sola que ahora está disponible en [LCITY]?

- 1 Si
- 0 No
- 7 No sé
- 8 Se rehúsa a contestar

B370. ¿Hay Crack sola que ahora está disponible en [LCITY]?

- 1 Si
- 0 No
- 7 No sé
- 8 Se rehúsa a contestar

B371. ¿Hay China White que ahora está disponible en [LCITY]?

- 1 Si
- 0 No
- 7 No sé
- 8 Se rehúsa a contestar

B372. ¿Hay OxyContin, sin receta que ahora está disponible en [LCITY]?

- 1 Si
- 0 No
- 7 No sé
- 8 Se rehúsa a contestar

B373. ¿Hay Otros opiáceos controlados sin receta (Vicodin, Darvon, Percocet) que ahora están disponible en [LCITY]?

- 1 Si
- 0 No
- 7 No sé
- 8 Se rehúsa a contestar

B374. ¿Hay Otros opiáceos (medicamentos controlados sin receta (Vicodin, Darvon, Percocet) que ahora están disponible en [LCITY]?

- 1 Si
- 0 No
- 7 No sé
- 8 Se rehúsa a contestar

B375. ¿Hay Barbitúricos sin receta (Amytal, Nembutal o Seconal) que ahora están disponible en [LCITY]?

- 1 Si
- 0 No
- 7 No sé
- 8 Se rehúsa a contestar



B376. ¿Hay Fentanilo (Fentanyl) que ahora está disponible en [LCITY]?

- 1 Si
- 0 No
- 7 No sé
- 8 Se rehúsa a contestar

B377. ¿Hay Otras drogas o combinaciones que no se haya mencionado en la lista que ahora están disponible en el condado de [LCITY]?

- 1 Si
- 0 No
- 7 No sé
- 8 Se rehúsa a contestar

***If B377 is equal to 1 then siga con P B378***

***If not, then siga con P B379.***

B378. Por favor especifica el nombre de otra droga o combinación de drogas que no se haya mencionado.

-----

B379. En comparación con antes de la pandemia de COVID, en los últimos 6 meses, ¿usted ha sido más o menos propenso a inyectarse solo? (Escoja una)

- 1 Más
- 2 Menos
- 3 Igual
- 4 No aplica
- 8 Se rehúsa a contestar

## Movilidad

*If DT\_SD is equal to 1 or NDT\_TJ is equal to 1 then siga con P B380*

*If not, then siga con P instrucción antes de B382.*

B380. ¿En qué ciudad estuviste la primera vez que te inyectaste drogas? (Escoja una)

- |   |                       |
|---|-----------------------|
| 1 | EUA                   |
| 2 | México                |
| 3 | Otro                  |
| 8 | Se rehúsa a contestar |

*If B380 is not equal to 3, then siga con P instrucción antes de B382.*

B381. Por favor especifica otro país:

-----

*If DT\_SD is equal to 1 then siga con P instrucción antes de B382*

*If not, then siga con P instrucción antes de B433.*

**LEA:** LEA: Esta siguiente serie de preguntas le preguntara de sus experiencias en los Estados Unidos.

*If Q4 is equal to 1 then siga con P B382*

*If not, then siga con P instrucción antes de B384.*

B382. Me puedes recordar, ¿Cuándo fue la última vez que fuiste a México?

**ENTREVISTADOR:** Preguntar por un número específico de días, meses, años.

- |          |                               |
|----------|-------------------------------|
| __ __ __ | AÑOS                          |
| __ __ __ | MESES                         |
| __ __ __ | DÍAS                          |
| 998      | Se rehúsa a contestar (Meses) |

B383. ¿Cuándo fue la vez anterior (antes de la última vez) que Ud. viajó a México?  
**ENTREVISTADOR: Preguntar por un número específico de días, meses, años.**

|       |                               |
|-------|-------------------------------|
| — — — | AÑOS                          |
| — — — | MESES                         |
| — — — | DÍAS                          |
| 998   | Se rehúsa a contestar (Meses) |

*If Q4 is equal to 2 then siga con P B384*

*If not, then siga con P instrucción antes de B385.*

B384. ¿Cuándo fue la vez anterior (antes de hoy) que Ud. viajó a México? **ENTREVISTADOR:**  
**Preguntar por un número específico de días, meses, años.**

|       |                               |
|-------|-------------------------------|
| — — — | AÑOS                          |
| — — — | MESES                         |
| — — — | DÍAS                          |
| 998   | Se rehúsa a contestar (Meses) |

**LSTMX = If(Q4 is equal to 2, 0, If(Q4 is equal to 1, B382, 999))**

*If LSTMX is greater than 6 and LSTMX is not equal to 998 then siga con P B385*

*If not, then siga con P instrucción antes de B387.*

B385. La última vez que estuviste en México, ¿cuál de las siguientes cosas hiciste con personas que viven ahí? **(Entrevistador lea en voz alta la lista, escoja todas las que apliquen)**  
(Marque todas las que apliquen)

- Visitar amigos
- Visitar familia
- Fui a la farmacia
- Use drogas (no inyectadas)
- Me inyecte drogas
- Compre drogas
- Vendi drogas
- Compre jeringas
- Vendi sexo
- Compre sexo
- Tuve sexo con una mujer (no intercambio por sexo)
- Tuve sexo con un hombre (no intercambio por sexo)
- Otra cosa
- No interactué con alguien de México
- Se rehúsa a contestar

***If B385N is equal to 1 and  $B385A + B385B + B385C + B385D + B385E + B385F + B385G + B385H + B385I + B385J + B385K + B385L + B385M$  is greater than 0 then LEA: "Solo puede elegir la respuesta "No interactué con nadie" por sí sola. Por favor revise las respuestas." and siga con P B385.***

***If B385M is not equal to 1, then siga con P instrucción antes de B387.***

B386. Especifique, por favor

-----

***If LSTMX is less than 6 or LSTMX is equal to 6 then siga con P B387***

***If not, then siga con P B407.***

B387. ¿Cuántas veces fuiste a México en los últimos 6 meses?

|       |                       |
|-------|-----------------------|
| _ _ _ | veces                 |
| 998   | Se rehúsa a contestar |

***If B387 is equal to 0 or B387 is equal to 998, then siga con P B407.***

B388. ¿A qué ciudades fuiste en México? (Marque todas las que apliquen)

|   |                       |
|---|-----------------------|
| _ | Tijuana               |
| _ | Rosarito              |
| _ | Ensenada              |
| _ | Tecate                |
| _ | Mexicali              |
| _ | Ciudad Juárez         |
| _ | Otro                  |
| _ | Se rehúsa a contestar |

***If B388G is not equal to 1, then siga con P instrucción antes de B390.***

B389. Por favor especifique que otra ciudad en México:

\_\_\_\_\_

***If B388A + B388B + B388C + B388D + B388E + B388F + B388G is equal to 1 or B388 is equal to 8, then siga con P B392.***

B390. ¿A qué ciudad fuiste más seguido en México en los últimos 6 meses? (Escoja una)

- 1 Tijuana
- 2 Rosarito
- 3 Ensenada
- 4 Tecate
- 5 Mexicali
- 6 Ciudad Juárez
- 7 Otro
- 8 Se rehúsa a contestar

*If B390 is equal to 1 and B388A is not equal to 1 or B390 is equal to 2 and B388B is not equal to 1 or B390 is equal to 3 and B388C is not equal to 1 or B390 is equal to 4 and B388D is not equal to 1 or B390 is equal to 5 and B388E is not equal to 1 or B390 is equal to 6 and B388F is not equal to 1 or B390 is equal to 7 and B388G is not equal to 1 then LEA: "El participante solo puede elegir la ciudad más frecuente de las ciudades mencionadas anteriormente." and siga con P B390.*

*If B390 is not equal to 7, then siga con P B392.*

B391. Por favor especifique que otra ciudad en México:

-----

B392. ¿Cuál de las siguientes actividades hiciste cuando fuiste a México en los últimos 6 meses? (entrevistador, leer en voz alta y escoger todas las que apliquen) (Marque todas las que apliquen)

- Visitar amigos
- Visitar familia
- De fiesta
- Compre drogas
- Use drogas
- Fui a un picadero
- Compre sexo
- Vendi sexo
- Fui a un tratamiento para drogas
- Fui a la farmacia
- Otro especifica
- Se rehúsa a contestar

***If B392K is not equal to 1, then siga con P instrucción antes de B394.***

B393. Por favor, especifica

-----

***If B392E is equal to 1 then siga con P B394***

***If not, then siga con P B396.***

B394. ¿Por qué vas a México a usar drogas? (Marque todas las que apliquen)

- Drogas más baratas
- Mejor calidad de droga/mejor viaje
- Menos posibilidad de ser molestado por la policía
- Mas disponibilidad de droga
- Conozco mejor y me siento más cómodo/a allí
- Puedo salir de fiesta/trabajadoras sexuales
- Otro especifica
- Se rehúsa a contestar

***If B394G is not equal to 1, then siga con P B396.***

B395. Por favor especifica otras razones

-----



B396. **En los últimos 6 meses**, ¿compraste alguna de estas cosas en una farmacia en México?  
(Marque todas las que apliquen)

- Diazepam
- Viagra o Cialis
- Rivotril
- Fentanilo
- Jeringas
- Antibioticos
- Valium
- Ativan
- Restoril
- Vicodin
- Amytal
- Seconal
- Darvon
- Percocet
- Otro
- Se rehúsa a contestar
- No corresponde

***If B3960 is not equal to 1, then siga con P B398.***

B397. Por favor, especifica

-----

B398. En los últimos 6 meses, ¿le pagaste a alguien como a un jalador o a un servicio para obtener drogas o comprar sexo en México?

- 1 Si
- 0 No
- 8 Se rehúsa a contestar

B399. En los últimos 6 meses, ¿compraste jeringa que ya vinieran preparada/lLENAS con droga en México?

- 1 Si
- 0 No
- 8 Se rehúsa a contestar

***If B388A is equal to 1 or B390 is equal to 1 then siga con P B400***

***If not, then siga con P B404.***

B400. En los últimos 6 meses, ¿a qué parte de la ciudad (que colonia) fuiste cuando estuviste en Tijuana? (Entrevistador: Buscar ubicaciones en mapa con indicaciones del participante, escoja todas las que apliquen) (Marque todas las que apliquen)

- Zona Norte
- La Mesa
- El Florido
- Playas de Tijuana
- 5 y 10
- Otay
- Otro
- No sé
- Se rehúsa a contestar

***If B400G is not equal to 1, then siga con P instrucción antes de B402.***

B401. Por favor especifica en que otra parte de la ciudad/colonia:

-----

*If B400A + B400B + B400C + B400D + B400E + B400F + B400G is equal to 1 or B400 is equal to 97 or B400 is equal to 98 or B400 is equal to 99, then siga con P B404.*

B402. En los últimos 6 meses, ¿a qué parte de la ciudad (que colonia) fuiste *más seguido* cuando estuviste en Tijuana? (**Entrevistador: Buscar ubicaciones en mapa con indicaciones del participante**) (Escoja una)

- |    |                       |
|----|-----------------------|
| 01 | Zona Norte            |
| 02 | La Mesa               |
| 03 | El Florido            |
| 04 | Playas de Tijuana     |
| 05 | 5 y 10                |
| 06 | Otay                  |
| 07 | Otro                  |
| 97 | No sé                 |
| 98 | Se rehúsa a contestar |

*If B402 is equal to 1 and B400A is not equal to 1 or B402 is equal to 2 and B400B is not equal to 1 or B402 is equal to 3 and B400C is not equal to 1 or B402 is equal to 4 and B400D is not equal to 1 or B402 is equal to 5 and B400E is not equal to 1 or B402 is equal to 6 and B400F is not equal to 1 or B402 is equal to 7 and B400G is not equal to 1 then LEA: "El participante solo pudo elegir la colonia más frecuente de las colonias mencionadas anteriormente." and siga con P B402.*

*If B402 is not equal to 7, then siga con P B404.*

B403. Por favor especifica en que otra parte de la ciudad/colonia:

-----

B404. En los últimos 6 meses, cuando fuiste a México, ¿En qué tipo de lugares pasaste tu tiempo?  
(Entrevistador leer la lista, escoja todas las que apliquen) (Marque todas las que apliquen)

- Mi c
- En c
- Pica
- Cafe
- Rest
- Hote
- Mote
- Ubic
- Bar/
- Burc
- Strip
- Bañ
- Parc
- Otro
- Se r

***If B404N is not equal to 1, then siga con P B406.***

B405. Por favor especifica otra lugar

-----

B406. En promedio, ¿Cuánto tiempo te quedaste en México cuando visitabas en cada ocasión en los últimos 6 meses?

— — —

MESES

— — —

DÍAS

— — —

HOURS

998

Se rehúsa a contestar (Días)

B407. Comparado con antes de la pandemia de COVID, en los últimos 6 meses, ¿Qué tan mas o menos seguido viajas a México y usas o compras drogas? (Escoja una)

1

mas

2

menos

3

igual

8

Se rehúsa a contestar

***If B387 is equal to 0 or B387 is equal to 998 or LSTMX is greater than 6, then siga con P instrucción antes de B433.***

***LEA: Ahora me gustaría que pienses sobre tus experiencias con personas de México mientras tu estuviste en México en los últimos 6 meses.***

B408. En los últimos 6 meses, ¿cuáles de las siguientes cosas hiciste en México con personas que viven ahí? **(Entrevistador lea en voz alta la lista, escoja todas la que apliquen)**  
(Marque todas las que apliquen)

- Uso drogas (no inyectadas)
- Se inyecto drogas
- Compró drogas
- Vendió drogas
- Compró jeringas
- Vendió sexo
- Compró sexo
- Tuvo sexo con una mujer (no intercambio por sexo)
- Tuvo sexo con un hombre (no intercambio por sexo)
- Otro
- No interactué con alguien de México
- Se rehúsa a contestar

***If B408K is equal to 1 and B408A + B408B + B408C + B408D + B408E + B408F + B408G + B408H + B408I + B408J is greater than 0 then LEA: "Solo puede elegir la respuesta "No interactué con nadie" por sí sola. Por favor revise las respuestas." and siga con P B408.***

***If B408J is not equal to 1, then siga con P instrucción antes de B410.***

B409. Por favor especifica la actividad.

\_\_\_\_\_

***If B408A is not equal to 1, then siga con P instrucción antes de B419.***

B410. En los últimos 6 meses cuando estuviste en México, ¿Con cuantas personas diferentes que viven ahí usaste drogas (no inyectadas)?

\_\_ \_\_ # de personas

98 Se rehúsa a contestar

**If B410 is equal to 0 or B410 is equal to 98, then siga con P instrucción antes de B419.**

**LEA: ENTREVISTADOR, LEA AL PARTICIPANTE: La siguientes preguntas se refieren a las personas que viven en México con las que tú has usado drogas no inyectables en los últimos 6 meses en México.**

B411. ¿Cuál fue tu relación con ellos? (Marque todas las que apliquen)

- Familiar
- Amigo/a
- Pareja sexual (no por intercambio por sexo)
- Cliente de intercambio sexual (pareja por pago)
- Conocido
- Desconocido
- Otro
- Se rehúsa a contestar

**If B411G is not equal to 1, then siga con P B413.**

B412. Por favor especifica otro.

-----

B413. ¿Donde conociste a estas personas? (Marque todas las que apliquen)

- Su casa
- Pica
- Café
- Hotel
- Ubicación
- Bar/
- Buro
- Strip
- Bañ
- Parc
- Otro
- Se n

*If B413K is not equal to 1, then siga con P B415.*

B414. Por favor especifica otro.

-----



B415. ¿Qué tipo de drogas usaste (no inyectada) con ellos? (Marque todas las que apliquen)

- Heroína en goma/Goma negra (la negra) sola
- Heroína en polvo sola
- Cocaína (en polvo) sola
- Heroína y cocaína juntas (speedball)
- Metanfetamina/cristal
- Crack sola
- China White sola
- OxyContin, sin receta
- Otro opioide/sustancia controlada sin receta (Vicodin, Darvon, Percocet)
- Tranquilizantes (Rivotril, Diazepam, Valium, Ativan o Restoril)
- Barbituricos sin receta (Amytal, Nembutal, o Seconal)
- Fentanilo (Fentanyl)
- Otra droga o combinación de drogas no mencionada anteriormente
- Se rehúsa a contestar

***If B415M is not equal to 1, then siga con P B417.***

B416. Por favor especifica otra droga o combinación de drogas:

-----

B417. ¿Les regalaste o prestaste cualquier tipo de equipo de uso de droga, como pipa o popote?  
(Escoja una)

- 0 No
- 1 Si
- 2 No usamos pipa o popote
- 8 Se rehúsa a contestar

***If B417 is equal to 2, then siga con P instrucción antes de B419.***

- B418. ¿Usaste una pipa o popote después de cualquiera de ellos?
- |   |                       |
|---|-----------------------|
| 1 | Si                    |
| 0 | No                    |
| 8 | Se rehúsa a contestar |

***If B408B is not equal to 1, then siga con P B429.***

- B419. En los últimos 6 meses, cuando estuviste en Mexico ¿con cuantas personas diferentes te inyectaste drogas?

— —

98 Se rehúsa a contestar

***If B419 is equal to 0 or B419 is equal to 98, then siga con P B429.***

***LEA: LEER: La siguientes preguntas se refieren a las personas que viven en México con las que tú has usado drogas inyectables en los últimos 6 meses en México.***

- B420. ¿Cuál fue tu relación con ellos?

**ENTREVISTADOR: LEA las opciones y escoja todas las que apliquen** (Marque todas las que apliquen)

- |   |                                                 |
|---|-------------------------------------------------|
| — | Familiar                                        |
| — | Amigo/a                                         |
| — | Pareja sexual (no por intercambio por sexo)     |
| — | Cliente de intercambio sexual (pareja por pago) |
| — | Conocido                                        |
| — | Desconocido                                     |
| — | Otro                                            |
| — | Se rehúsa a contestar                           |

***If B420G is not equal to 1, then siga con P B422.***

B421. Por favor especifica otro.

-----

B422. ¿Donde conociste a estas personas? (Marque todas las que apliquen)

- Su c
- Pica
- Ubic
- Bar/
- Buro
- Strip
- Bañ
- Parc
- Otro
- Se n

*If B422I is not equal to 1, then siga con P B424.*

B423. Por favor especifica otro.

-----

B424. ¿Qué tipo de drogas te inyectaste con ellos? (Marque todas las que apliquen)

- Heroína en goma/Goma negra (la negra) sola
- Heroína en polvo sola
- Cocaína (en polvo) sola
- Heroína y cocaína juntas (speedball)
- Metanfetamina/cristal
- Crack sola
- China White sola
- OxyContin, sin receta
- Otro opioide/sustancia controlada sin receta (Vicodin, Darvon, Percocet)
- Tranquilizantes (Rivotril, Diazepam, Valium, Ativan o Restoril)
- Barbituricos sin receta (Amytal, Nembutal, o Seconal)
- Fentanilo (Fentanyl)
- Otra droga o combinación de drogas no mencionada anteriormente
- Se rehúsa a contestar

***If B424M is not equal to 1, then siga con P B426.***

B425. Por favor especifique otra droga o combinación de drogas.

-----

B426. ¿Regalaste o prestaste tu jeringa a cualquiera de estas personas para inyectarse después de que tú la usaras?

- 1 Si
- 0 No
- 8 Se rehúsa a contestar

B427. ¿Te inyectaste con una jeringa que cualquiera de estas personas haya usado antes para inyectarse antes de ti?

1 Si  
0 No  
8 Se rehúsa a contestar

B428. ¿Usó un cacharro, algodón, o agua de enjuague después o a la misma vez que otras personas con las que estaba?

1 Si  
0 No  
8 Se rehúsa a contestar

B429. En los **últimos 6 meses, cuando fuiste a México**, ¿a cuántas personas les ha dado drogas, dinero, comida, hospedaje, transportación, alcohol, o algo a cambio de tener relaciones sexuales con usted?

— —  
98 Se rehúsa a contestar

B430. Comparado con antes de la pandemia, en los últimos 6 meses, cuando estuvo en México, ¿ha dado dinero, drogas o alguna otra cosa a cambio de tener relaciones sexuales con usted más seguido o menos seguido que antes? (Escoja una)

1 Mas  
2 Menos  
3 Igual  
4 Nunca  
8 Se rehúsa a contestar

B431. En los **últimos 6 meses, cuando fuiste a México**, ¿cuántas personas le dieron a Ud. drogas, dinero, comida, refugio, transporte, alcohol, o cualquier cosa a cambio de sexo?

— —  
98 Se rehúsa a contestar

B432. Comparado con antes de la pandemia, en los últimos 6 meses, cuando estuvo en México, ¿le han dado dinero, drogas o algún otra cosa a cambio de tener relaciones sexuales con usted más seguido o menos seguido que antes? (Escoja una)

- 1 Mas
- 2 Menos
- 3 Igual
- 4 Nunca
- 8 Se rehúsa a contestar

**USO DE DROGAS en Mexico por TD SD.**

*If DT\_SD is not equal to 1, then siga con P B625.*

**LEA: LEER: ENTREVISTADOR, LEA AL PARTICIPANTE:** *Ahora te voy a preguntar algunas preguntas sobre tu uso de drogas en México. Algunas de estas preguntas te van a pedir detalles que pueden ser difíciles de recordar. Por favor haz lo mejor que puedas para dar una respuesta aun si no es el mejor estimado. Recuerda que nosotros no compartiremos tus respuestas con la policía o con cualquier otra persona fuera de este estudio. Si estuviste en la cárcel o prisión en los últimos 6 meses, por favor piensa en el periodo en que estuviste fuera de la cárcel o prisión para responder a las preguntas.*

*If LSTMX is greater than 6 and LSTMX is not equal to 998, then siga con P B434.*

B433. En los últimos 6 meses, en promedio ¿qué tan seguido fumaste o vapeaste marihuana o hachís por sola mientras estabas en México? (Escoja una)

- |    |                       |
|----|-----------------------|
| 00 | Nunca                 |
| 01 | 1 vez al mes o menos  |
| 02 | 2-3 días al mes       |
| 03 | Una vez a la semana   |
| 04 | 2-3 días a la semana  |
| 05 | 4-6 días a la semana  |
| 06 | Una vez al día        |
| 07 | 2-3 veces al día      |
| 08 | 4 veces o mas por día |
| 98 | Se rehúsa a contestar |

B434. ¿Alguna vez has usado goma negra/heroína mientras estuviste en México?

- |   |                       |
|---|-----------------------|
| 1 | Si                    |
| 0 | No                    |
| 8 | Se rehúsa a contestar |

*If B434 is not equal to 1, then siga con P B448.*

B435. ¿Alguna vez fumaste, aspiraste, o inhalaste heroína cuando estuviste en México?

- 1 Si
- 0 No
- 8 Se rehúsa a contestar

*If B435 is not equal to 1, then siga con P B438.*

B436. ¿Cuándo fue la última vez que fumaste, aspiraste o inhalaste heroína en México?

- — — AÑOS
- — — MESES
- — — DÍAS
- 998 Se rehúsa a contestar (Meses)
- 999 No corresponde (Meses)

*If B436 is less than LSTMX then LEA: "Esa respuesta es menor que la última vez que el participante fue a México. Por favor verificar respuesta." and siga con P B436.*

*If B436 is equal to 998 or B436 is equal to 999 or B436 is greater than 6, then siga con P B438.*



B437. En los últimos 6 meses, en promedio ¿qué tan seguido fumaste, aspiraste o inhalaste heroína mientras estabas en México? (Escoja una)

- 00 Nunca
- 01 1 vez al mes o menos
- 02 2-3 días al mes
- 03 Una vez a la semana
- 04 2-3 días a la semana
- 05 4-6 días a la semana
- 06 Una vez al día
- 07 2-3 veces al día
- 08 4 veces o mas por día
- 98 Se rehúsa a contestar

B438. ¿Alguna vez te has inyectado heroína (sola) cuando estuviste en México?

- 1 Si
- 0 No
- 8 Se rehúsa a contestar

***If B438 is not equal to 1, then siga con P instrucción antes de B441.***

B439. ¿Cuándo fue la última vez que te inyectaste heroína sola en México?

- \_\_\_ \_\_ \_\_ AÑOS
- \_\_\_ \_\_ \_\_ MESES
- \_\_\_ \_\_ \_\_ DÍAS
- 998 Se rehúsa a contestar (Meses)
- 999 No corresponde (Meses)

***If B439 is less than LSTMX then LEA: "Esa respuesta es menor que la última vez que el participante fue a México. Por favor verificar respuesta." and siga con P B439.***

***If B439 is equal to 998 or B439 is equal to 999 or B439 is greater than 6, then siga con P instrucción antes de B441.***

B440. En los últimos 6 meses, en promedio ¿Qué tan seguido te inyectaste heroína sola cuando estuviste en México? (Escoja una)

- |    |                       |
|----|-----------------------|
| 00 | Nunca                 |
| 01 | 1 vez al mes o menos  |
| 02 | 2-3 días al mes       |
| 03 | Una vez a la semana   |
| 04 | 2-3 días a la semana  |
| 05 | 4-6 días a la semana  |
| 06 | Una vez al día        |
| 07 | 2-3 veces al día      |
| 08 | 4 veces o mas por día |
| 98 | Se rehúsa a contestar |

***If (B436 is equal to 998 or B436 is equal to 999 or B436 is greater than 6) and (B439 is equal to 998 or B439 is equal to 999 or B439 is greater than 6), then siga con P B448.***

B441. En los últimos 6 meses, cuando usaste heroína en México, ¿de qué color era? **Leer en voz alta la lista. Escoja todas las que apliquen.** (Marque todas las que apliquen)

- |   |                       |
|---|-----------------------|
| — | Goma negra            |
| — | Polvo café            |
| — | Polvo blanco          |
| — | Polvo amarillo        |
| — | Polvo naranja         |
| — | Otro                  |
| — | Se rehúsa a contestar |
| — | No corresponde        |

*If B441F is not equal to 1, then siga con P instrucción antes de B443.*

B442. Por favor especifica el color de heroína que usaste.

-----

*If B439 is equal to 998 or B439 is equal to 999 or B439 is greater than 6, then siga con P B448.*

B443. En los últimos 6 meses, cuando te inyectaste heroína en México, ¿de qué color fue **más seguido**? (Escoja una)

- |   |                       |
|---|-----------------------|
| 1 | Goma negra            |
| 2 | Polvo café            |
| 3 | Polvo blanco          |
| 4 | Polvo amarillo        |
| 5 | Polvo naranja         |
| 6 | Otro                  |
| 8 | Se rehúsa a contestar |
| 9 | No corresponde        |

*If B443 is not equal to 6, then siga con P instrucción antes de B445.*

B444. Por favor especificar el color de heroína que te inyectaste más seguido.

-----

*If B443 is not equal to 4, then siga con P instrucción antes de B446.*

B445. En los últimos 6 meses, cuando te inyectaste heroína en Mexico, ¿Qué tan seguido fue color *amarillo*? (Escoja una)

- 1 Nunca
- 2 Menos de la mitad del tiempo
- 3 Casi la mitad del tiempo
- 4 Más de la mitad del tiempo
- 5 Siempre
- 8 Se rehúsa a contestar

*If B443 is not equal to 5, then siga con P instrucción antes de B447.*

B446. En los últimos 6 meses, cuando te inyectaste heroína en México, ¿Qué tan seguido fue color *naranja*? (Escoja una)

- 1 Nunca
- 2 Menos de la mitad del tiempo
- 3 Casi la mitad del tiempo
- 4 Más de la mitad del tiempo
- 5 Siempre
- 8 Se rehúsa a contestar

*If B443 is not equal to 6, then siga con P B448.*

B447. En los últimos 6 meses, cuando te inyectaste heroína en México, ¿Qué tan seguido fue [Respuesta a P B444]? (Escoja una)

- 1 Nunca
- 2 Menos de la mitad del tiempo
- 3 Casi la mitad del tiempo
- 4 Más de la mitad del tiempo
- 5 Siempre
- 8 Se rehúsa a contestar

B448. ¿Alguna vez usaste cocaína o crack cuando estuviste en México?

- 1 Si
- 0 No
- 8 Se rehúsa a contestar

*If B448 is not equal to 1, then siga con P B458.*

B449. ¿Alguna vez has fumado, aspirado o inhalado crack o cocaína en polvo cuando estuviste en México?

- 1 Si
- 0 No
- 8 Se rehúsa a contestar

*If B449 is not equal to 1, then siga con P B452.*

B450. ¿Cuándo fue la última vez que fumaste, aspiraste o inhalaste crack o cocaína en polvo cuando estuviste en México?

- |          |                               |
|----------|-------------------------------|
| __ __ __ | AÑOS                          |
| __ __ __ | MESES                         |
| __ __ __ | DÍAS                          |
| 998      | Se rehúsa a contestar (Meses) |
| 999      | No corresponde (Meses)        |

*If B450 is less than LSTMX then LEA: "Esa respuesta es menor que la última vez que el participante fue a México. Por favor verificar respuesta." and siga con P B450.*

*If B450 is equal to 998 or B450 is equal to 999 or B450 is greater than 6, then siga con P B452.*

B451. En los últimos 6 meses, en promedio ¿Qué tan seguido fumaste, aspiraste o inhalaste crack o cocaína en polvo cuando estabas en México? (Escoja una)

- |    |                       |
|----|-----------------------|
| 00 | Nunca                 |
| 01 | 1 vez al mes o menos  |
| 02 | 2-3 días al mes       |
| 03 | Una vez a la semana   |
| 04 | 2-3 días a la semana  |
| 05 | 4-6 días a la semana  |
| 06 | Una vez al día        |
| 07 | 2-3 veces al día      |
| 08 | 4 veces o mas por día |
| 98 | Se rehúsa a contestar |

B452. ¿Alguna vez te has inyectado cocaína sola cuando estabas en México?

- 1 Si
- 0 No
- 8 Se rehúsa a contestar

*If B452 is not equal to 1, then siga con P instrucción antes de B455.*

B453. ¿Cuándo fue la última vez que te inyectaste cocaína sola cuando estuviste en México?

- — — AÑOS
- — — MESES
- — — DÍAS
- 998 Se rehúsa a contestar (Meses)
- 999 No corresponde (Meses)

*If B453 is less than LSTMX then LEA: "Esa respuesta es menor que la última vez que el participante fue a México. Por favor verificar respuesta." and siga con P B453.*

*If B453 is equal to 998 or B453 is equal to 999 or B453 is greater than 6, then siga con P instrucción antes de B455.*

B454. En los últimos 6 meses, en promedio ¿Qué tan seguido te inyectaste cocaína sola cuando estuviste en México? (Escoja una)

- 00 Nunca
- 01 1 vez al mes o menos
- 02 2-3 días al mes
- 03 Una vez a la semana
- 04 2-3 días a la semana
- 05 4-6 días a la semana
- 06 Una vez al día
- 07 2-3 veces al día
- 08 4 veces o mas por día
- 98 Se rehúsa a contestar

*If B434 is not equal to 1, then siga con P B458.*

B455. ¿Alguna vez te has inyectado heroína y cocaína juntas (speedball) cuando estuviste en México?

- 1 Si
- 0 No
- 8 Se rehúsa a contestar

*If B455 is not equal to 1, then siga con P B458.*

B456. ¿Cuándo fue la última vez que te inyectaste heroína y cocaína juntas (speedball) cuando estuviste en México?

- \_\_\_ \_\_ \_\_ AÑOS
- \_\_\_ \_\_ \_\_ MESES
- \_\_\_ \_\_ \_\_ DÍAS
- 998 Se rehúsa a contestar (Meses)
- 999 No corresponde (Meses)



***If B456 is less than LSTMX then LEA: "Esa respuesta es menor que la última vez que el participante fue a México. Por favor verificar respuesta." and siga con P B456.***

***If B456 is equal to 998 or B456 is equal to 999 or B456 is greater than 6, then siga con P B458.***

B457. En los últimos 6 meses, en promedio ¿Qué tan seguido te inyectaste heroína y cocaína juntas (speedball) cuando estuviste en México? (Escoja una)

- |    |                       |
|----|-----------------------|
| 00 | Nunca                 |
| 01 | 1 vez al mes o menos  |
| 02 | 2-3 días al mes       |
| 03 | Una vez a la semana   |
| 04 | 2-3 días a la semana  |
| 05 | 4-6 días a la semana  |
| 06 | Una vez al día        |
| 07 | 2-3 veces al día      |
| 08 | 4 veces o mas por día |
| 98 | Se rehúsa a contestar |

B458. ¿Alguna vez has usado metanfetamina/cristal cuando estuviste en México?

- |   |                       |
|---|-----------------------|
| 1 | Si                    |
| 0 | No                    |
| 8 | Se rehúsa a contestar |

***If B458 is not equal to 1, then siga con P B475.***

B459. ¿Alguna vez has fumado, aspirado, inhalado o vapeado metanfetamina/cristal sola cuando estuviste en México?

- |   |                       |
|---|-----------------------|
| 1 | Si                    |
| 0 | No                    |
| 8 | Se rehúsa a contestar |

***If B459 is not equal to 1, then siga con P B462.***

B460. ¿Cuándo fue la última vez que fumaste, aspiraste, o inhalaste metanfetaminas/cristal sola cuando estuviste en México?

- |       |                               |
|-------|-------------------------------|
| — — — | AÑOS                          |
| — — — | MESES                         |
| — — — | DÍAS                          |
| 998   | Se rehúsa a contestar (Meses) |
| 999   | No corresponde (Meses)        |

***If B460 is less than LSTMX then LEA: "Esa respuesta es menor que la última vez que el participante fue a México. Por favor verificar respuesta." and siga con P B460.***

***If B460 is equal to 998 or B460 is equal to 999 or B460 is greater than 6, then siga con P B462.***

B461. En los últimos 6 meses, en promedio ¿Qué tan seguido fumaste, aspiraste, inhalaste o vapeaste metanfetaminas/cristal cuando estuviste en México? (Escoja una)

- |    |                       |
|----|-----------------------|
| 00 | Nunca                 |
| 01 | 1 vez al mes o menos  |
| 02 | 2-3 días al mes       |
| 03 | Una vez a la semana   |
| 04 | 2-3 días a la semana  |
| 05 | 4-6 días a la semana  |
| 06 | Una vez al día        |
| 07 | 2-3 veces al día      |
| 08 | 4 veces o mas por día |
| 98 | Se rehúsa a contestar |

B462. ¿Alguna vez te has inyectado metanfetaminas/cristal sola cuando estuviste en México?

- 1 Si
- 0 No
- 8 Se rehúsa a contestar

*If B462 is not equal to 1, then siga con P instrucción antes de B465.*

B463. ¿Cuándo fue la última vez que te inyectaste metanfetaminas/cristal sola cuando estuviste en México?

- \_\_\_ \_\_\_ \_\_\_ AÑOS
- \_\_\_ \_\_\_ \_\_\_ MESES
- \_\_\_ \_\_\_ \_\_\_ DÍAS
- 998 Se rehúsa a contestar (Meses)
- 999 No corresponde (Meses)

*If B463 is less than LSTMX then LEA: "Esa respuesta es menor que la última vez que el participante fue a México. Por favor verificar respuesta." and siga con P B463.*

*If B463 is equal to 998 or B463 is equal to 999 or B463 is greater than 6, then siga con P instrucción antes de B465.*

B464. En los últimos 6 meses, en promedio ¿Qué tan seguido te inyectaste metanfetaminas/cristal solo cuando estuviste en México? (Escoja una)

- 00 Nunca
- 01 1 vez al mes o menos
- 02 2-3 días al mes
- 03 Una vez a la semana
- 04 2-3 días a la semana
- 05 4-6 días a la semana
- 06 Una vez al día
- 07 2-3 veces al día
- 08 4 veces o mas por día
- 98 Se rehúsa a contestar

***If B448 is not equal to 1, then siga con P instrucción antes de B468.***

B465. ¿Alguna vez te inyectaste metanfetaminas/cristal y cocaína juntas cuando estuviste en México?

- 1 Si
- 0 No
- 8 Se rehúsa a contestar

***If B465 is not equal to 1, then siga con P instrucción antes de B468.***

B466. ¿Cuándo fue la última vez que te inyectaste metanfetaminas/cristal y cocaína juntas cuando estuviste en México?

- \_\_\_ \_\_ \_\_ AÑOS
- \_\_\_ \_\_ \_\_ MESES
- \_\_\_ \_\_ \_\_ DÍAS
- 998 Se rehúsa a contestar (Meses)
- 999 No corresponde (Meses)

***If B466 is less than LSTMX then LEA: "Esa respuesta es menor que la última vez que el participante fue a México. Por favor verificar respuesta." and siga con P B466.***

***If B466 is equal to 998 or B466 is equal to 999 or B466 is greater than 6, then siga con P instrucción antes de B468.***

B467. En los últimos 6 meses, en promedio, ¿qué tan seguido te inyectaste metanfetaminas/cristal y cocaína juntas cuando estuviste en México? (Escoja una)

- |    |                       |
|----|-----------------------|
| 00 | Nunca                 |
| 01 | 1 vez al mes o menos  |
| 02 | 2-3 días al mes       |
| 03 | Una vez a la semana   |
| 04 | 2-3 días a la semana  |
| 05 | 4-6 días a la semana  |
| 06 | Una vez al día        |
| 07 | 2-3 veces al día      |
| 08 | 4 veces o mas por día |
| 98 | Se rehúsa a contestar |

***If B434 is not equal to 1, then siga con P instrucción antes de B471.***

B468. ¿Alguna vez te has inyectado metanfetaminas/cristal y heroína juntas cuando estuviste en México?

- |   |                       |
|---|-----------------------|
| 1 | Si                    |
| 0 | No                    |
| 8 | Se rehúsa a contestar |

***If B468 is not equal to 1, then siga con P instrucción antes de B471.***

B469. ¿Cuándo fue la última vez que te inyectaste metanfetaminas/cristal y heroína juntas cuando estuviste en México?

- |       |                               |
|-------|-------------------------------|
| — — — | AÑOS                          |
| — — — | MESES                         |
| — — — | DÍAS                          |
| 998   | Se rehúsa a contestar (Meses) |
| 999   | No corresponde (Meses)        |

*If B469 is less than LSTMX then LEA: "Esa respuesta es menor que la última vez que el participante fue a México. Por favor verificar respuesta." and siga con P B469.*

*If B469 is equal to 998 or B469 is equal to 999 or B469 is greater than 6, then siga con P instrucción antes de B471.*

B470. En los últimos 6 meses, en promedio, ¿qué tan seguido te inyectaste metanfetaminas/cristal y heroína juntas cuando estuviste en México? (Escoja una)

- |    |                       |
|----|-----------------------|
| 00 | Nunca                 |
| 01 | 1 vez al mes o menos  |
| 02 | 2-3 días al mes       |
| 03 | Una vez a la semana   |
| 04 | 2-3 días a la semana  |
| 05 | 4-6 días a la semana  |
| 06 | Una vez al día        |
| 07 | 2-3 veces al día      |
| 08 | 4 veces o mas por día |
| 98 | Se rehúsa a contestar |

*If (B460 is equal to 998 or B460 is equal to 999 or B460 is greater than 6) and (B463 is equal to 998 or B463 is equal to 999 or B463 is greater than 6) and (B466 is equal to 998 or B466 is equal to 999 or B466 is greater than 6) and (B469 is equal to 998 or B469 is equal to 999 or B469 is greater than 6), then siga con P B475.*

B471. En los últimos 6 meses, cuando usaste metanfetamina en México, ¿de qué color era? (Marque todas las que apliquen)

- Blanco
- Rosa
- Verde
- Negro
- Amarillo
- Hielo (transparente)
- Otro
- Se rehúsa a contestar
- No corresponde

***If B471G is not equal to 1, then siga con P instrucción antes de B473.***

B472. Por favor especifica el color de metanfetaminas mientras estuviste en Mexico:

-----

***If (B463 is equal to 998 or B463 is equal to 999 or B463 is greater than 6) and (B466 is equal to 998 or B466 is equal to 999 or B466 is greater than 6) and (B469 is equal to 998 or B469 is equal to 999 or B469 is greater than 6), then siga con P B475.***

B473. En los últimos 6 meses, cuando te inyectaste metanfetamina en México, ¿de qué color fue más seguido? (Escoja una)

- 1 Blanco
- 2 Rosa
- 3 Verde
- 4 Negro
- 5 Amarillo
- 6 Hielo (transparente)
- 7 Otro
- 8 Se rehúsa a contestar
- 9 No corresponde

*If B473 is not equal to 7, then siga con P B475.*

B474. Por favor especifica el color de metanfetaminas.

-----

B475. ¿Alguna vez has usado China White cuando estuviste en México?

- 1 Si
- 0 No
- 8 Se rehúsa a contestar

*If B475 is not equal to 1, then siga con P B485.*

B476. ¿Alguna vez has fumado, aspirado o inhalado China White cuando estuviste en México?

- 1 Si
- 0 No
- 8 Se rehúsa a contestar

*If B476 is not equal to 1, then siga con P B479.*



B477. ¿Cuándo fue la última vez que fumaste, aspiraste o inhalaste China White en México?

- |          |                               |
|----------|-------------------------------|
| __ __ __ | AÑOS                          |
| __ __ __ | MESES                         |
| __ __ __ | DÍAS                          |
| 998      | Se rehúsa a contestar (Meses) |
| 999      | No corresponde (Meses)        |

*If B477 is less than LSTMX then LEA: "Esa respuesta es menor que la última vez que el participante fue a México. Por favor verificar respuesta." and siga con P B477.*

*If B477 is equal to 998 or B477 is equal to 999 or B477 is greater than 6, then siga con P B479.*

B478. En los últimos 6 meses, que tan seguido fumaste, aspiraste o inhalaste China White cuando estuviste en México? (Escoja una)

- |    |                       |
|----|-----------------------|
| 00 | Nunca                 |
| 01 | 1 vez al mes o menos  |
| 02 | 2-3 días al mes       |
| 03 | Una vez a la semana   |
| 04 | 2-3 días a la semana  |
| 05 | 4-6 días a la semana  |
| 06 | Una vez al día        |
| 07 | 2-3 veces al día      |
| 08 | 4 veces o mas por día |
| 98 | Se rehúsa a contestar |

B479. ¿Alguna vez te has inyectado China White sola en México?

- |   |                       |
|---|-----------------------|
| 1 | Si                    |
| 0 | No                    |
| 8 | Se rehúsa a contestar |

***If B479 is not equal to 1, then siga con P instrucción antes de B482.***

B480. ¿Cuándo fue la última vez que te inyectaste China White en México?

- |          |                               |
|----------|-------------------------------|
| __ __ __ | AÑOS                          |
| __ __ __ | MESES                         |
| __ __ __ | DÍAS                          |
| 998      | Se rehúsa a contestar (Meses) |
| 999      | No corresponde (Meses)        |

***If B480 is less than LSTMX then LEA: "Esa respuesta es menor que la última vez que el participante fue a México. Por favor verificar respuesta." and siga con P B480.***

***If B480 is equal to 998 or B480 is equal to 999 or B480 is greater than 6, then siga con P instrucción antes de B482.***

B481. En los últimos 6 meses, en promedio, ¿qué tan seguido te inyectaste China White cuando estuviste en México? (Escoja una)

- |    |                       |
|----|-----------------------|
| 00 | Nunca                 |
| 01 | 1 vez al mes o menos  |
| 02 | 2-3 días al mes       |
| 03 | Una vez a la semana   |
| 04 | 2-3 días a la semana  |
| 05 | 4-6 días a la semana  |
| 06 | Una vez al día        |
| 07 | 2-3 veces al día      |
| 08 | 4 veces o mas por día |
| 98 | Se rehúsa a contestar |

***If B458 is not equal to 1, then siga con P B485.***

B482. ¿Alguna vez te has inyectado China White y metanfetaminas/cristal juntas en México?

- 1 Si
- 0 No
- 8 Se rehúsa a contestar

*If B482 is not equal to 1, then siga con P B485.*

B483. ¿Cuándo fue la última vez que te inyectaste China White y metanfetaminas/cristal juntas cuando estuviste en México?

- \_\_\_ \_\_\_ \_\_\_ AÑOS
- \_\_\_ \_\_\_ \_\_\_ MESES
- \_\_\_ \_\_\_ \_\_\_ DÍAS
- 998 Se rehúsa a contestar (Meses)
- 999 No corresponde (Meses)

*If B483 is less than LSTMX then LEA: "Esa respuesta es menor que la última vez que el participante fue a México. Por favor verificar respuesta." and siga con P B483.*

*If B483 is equal to 998 or B483 is equal to 999 or B483 is greater than 6, then siga con P B485.*

B484. En los últimos 6 meses, ¿cuándo usaste China White y metanfetaminas/cristal juntas en México, en promedio que tan seguido te inyectaste las dos juntas? (Escoja una)

- 00 Nunca
- 01 1 vez al mes o menos
- 02 2-3 días al mes
- 03 Una vez a la semana
- 04 2-3 días a la semana
- 05 4-6 días a la semana
- 06 Una vez al día
- 07 2-3 veces al día
- 08 4 veces o mas por día
- 98 Se rehúsa a contestar

B485. ¿Alguna vez has usado fentanilo (Fentanyl) en México?

- 1 Si
- 0 No
- 8 Se rehúsa a contestar

*If B485 is not equal to 1, then siga con P B492.*

B486. ¿Cuándo fue la última vez que usaste fentanilo (Fentanyl) en México?

- \_\_\_ \_\_ \_\_ AÑOS
- \_\_\_ \_\_ \_\_ MESES
- \_\_\_ \_\_ \_\_ DÍAS
- 998 Se rehúsa a contestar (Meses)
- 999 No corresponde (Meses)

*If B486 is less than LSTMX then LEA: "Esa respuesta es menor que la última vez que el participante fue a México. Por favor verificar respuesta." and siga con P B486.*

***If B486 is equal to 998 or B486 is equal to 999 or B486 is greater than 6, then siga con P B492.***

B487. En los últimos 6 meses, ¿fumaste, inhalaste, aspiraste o vapeaste fentanilo en México?

- |   |                       |
|---|-----------------------|
| 1 | Si                    |
| 0 | No                    |
| 8 | Se rehúsa a contestar |

***If B487 is not equal to 1, then siga con P B489.***

B488. Durante los últimos 6 meses, en promedio que tan seguido fumaste, inhalaste, o aspiraste fentanilo (Fentanyl) cuando estuviste en México? (Escoja una)

- |    |                       |
|----|-----------------------|
| 00 | Nunca                 |
| 01 | 1 vez al mes o menos  |
| 02 | 2-3 días al mes       |
| 03 | Una vez a la semana   |
| 04 | 2-3 días a la semana  |
| 05 | 4-6 días a la semana  |
| 06 | Una vez al día        |
| 07 | 2-3 veces al día      |
| 08 | 4 veces o mas por día |
| 98 | Se rehúsa a contestar |

B489. ¿En los últimos 6 meses, te has inyectado fentanilo en México?

- |   |                       |
|---|-----------------------|
| 1 | Si                    |
| 0 | No                    |
| 8 | Se rehúsa a contestar |

***If B489 is not equal to 1, then siga con P instrucción antes de B491.***

B490. Durante los últimos 6 meses cuando estuviste en México, en promedio ¿Qué tan seguido te inyectaste fentanilo (fentanyl) solo? (Escoja una)

- |    |                       |
|----|-----------------------|
| 00 | Nunca                 |
| 01 | 1 vez al mes o menos  |
| 02 | 2-3 días al mes       |
| 03 | Una vez a la semana   |
| 04 | 2-3 días a la semana  |
| 05 | 4-6 días a la semana  |
| 06 | Una vez al día        |
| 07 | 2-3 veces al día      |
| 08 | 4 veces o mas por día |
| 98 | Se rehúsa a contestar |

*If B458 is not equal to 1, then siga con P B492.*

B491. En los últimos 6 meses, cuando estuviste en Mexico, en promedio, ¿Qué tan seguido te inyectaste fentanilo y metanfetaminas/cristal juntos? (Escoja una)

- |    |                       |
|----|-----------------------|
| 00 | Nunca                 |
| 01 | 1 vez al mes o menos  |
| 02 | 2-3 días al mes       |
| 03 | Una vez a la semana   |
| 04 | 2-3 días a la semana  |
| 05 | 4-6 días a la semana  |
| 06 | Una vez al día        |
| 07 | 2-3 veces al día      |
| 08 | 4 veces o mas por día |
| 98 | Se rehúsa a contestar |

B492. ¿Alguna vez has usado PCP/Polvo de Ángel cuando estabas en México?

- 1 Si
- 0 No
- 8 Se rehúsa a contestar

*If B492 is not equal to 1, then siga con P B495.*

B493. ¿Cuándo fue la última vez que fumaste, aspiraste o inhalaste PCP/Polvo de Ángel en México?

- — — AÑOS
- — — MESES
- — — DÍAS
- 998 Se rehúsa a contestar (Meses)
- 999 No corresponde (Meses)

*If B493 is less than LSTMX then LEA: "Esa respuesta es menor que la última vez que el participante fue a México. Por favor verificar respuesta." and siga con P B493.*

*If B493 is equal to 998 or B493 is equal to 999 or B493 is greater than 6, then siga con P B495.*

B494. En los últimos 6 meses, cuando usaste PCP en México, en promedio, que tan seguido lo fumaste, inhalaste o vapeaste? (Escoja una)

- 00 Nunca
- 01 1 vez al mes o menos
- 02 2-3 días al mes
- 03 Una vez a la semana
- 04 2-3 días a la semana
- 05 4-6 días a la semana
- 06 Una vez al día
- 07 2-3 veces al día
- 08 4 veces o mas por día
- 98 Se rehúsa a contestar

B495. ¿Alguna vez has usado éxtasis cuando estuviste en México?

- 1 Si
- 0 No
- 8 Se rehúsa a contestar

*If B495 is not equal to 1, then siga con P B501.*

B496. ¿Cuándo fue la última vez que usaste éxtasis en México?

- \_\_\_ \_\_ \_\_ AÑOS
- \_\_\_ \_\_ \_\_ MESES
- \_\_\_ \_\_ \_\_ DÍAS
- 998 Se rehúsa a contestar (Meses)
- 999 No corresponde (Meses)

*If B496 is less than LSTMX then LEA: "Esa respuesta es menor que la última vez que el participante fue a México. Por favor verificar respuesta." and siga con P B496.*



**If B496 is equal to 998 or B496 is equal to 999 or B496 is greater than 6, then siga con P B501.**

B497. En los últimos 6 meses cuando usaste éxtasis en México, ¿Cómo los usaste?

**Entrevistador: Si el participante indica que no usó éxtasis en México en los últimos 6 meses, marque No corresponde.**

(Marque todas las que apliquen)

- Inyectado
- Fumado (chasing)
- Aspirado
- Inhalado
- Tomado
- Rectal (bumping)
- Otro
- No corresponde
- Se rehúsa a contestar

**If B497 is greater than 1 and B497H is equal to 1 then LEA: "Solo puedes escoger la opcion "No corresponde" por si sola, verificar respuesta." and siga con P B497.**

**If B497G is not equal to 1, then siga con P instrucción antes de B499.**

B498. Especifica de que otra manera has usado éxtasis en los últimos 6 meses en México.

-----

**If B497A is not equal to 1, then siga con P instrucción antes de B500.**

B499. En los últimos 6 meses, cuando usaste éxtasis en México, en promedio, ¿qué tan seguido te lo inyectaste? (Escoja una)

- |    |                       |
|----|-----------------------|
| 00 | Nunca                 |
| 01 | 1 vez al mes o menos  |
| 02 | 2-3 días al mes       |
| 03 | Una vez a la semana   |
| 04 | 2-3 días a la semana  |
| 05 | 4-6 días a la semana  |
| 06 | Una vez al día        |
| 07 | 2-3 veces al día      |
| 08 | 4 veces o mas por día |
| 98 | Se rehúsa a contestar |

*If B497H is equal to 1 or B497 is equal to 98, then siga con P B501.*

B500. En los últimos 6 meses, cuando usaste éxtasis en México, en promedio, ¿qué tan seguido lo usaste de otra manera (no inyectada)? (Escoja una)

- |    |                       |
|----|-----------------------|
| 00 | Nunca                 |
| 01 | 1 vez al mes o menos  |
| 02 | 2-3 días al mes       |
| 03 | Una vez a la semana   |
| 04 | 2-3 días a la semana  |
| 05 | 4-6 días a la semana  |
| 06 | Una vez al día        |
| 07 | 2-3 veces al día      |
| 08 | 4 veces o mas por día |
| 98 | Se rehúsa a contestar |

- B501. ¿Alguna vez ha usado Ketamine (Special K, K) en México?
- |   |                       |
|---|-----------------------|
| 1 | Si                    |
| 0 | No                    |
| 8 | Se rehúsa a contestar |

*If B501 is not equal to 1, then siga con P B507.*

B502. ¿Cuándo fue la última vez que usaste Ketamine (Special K, K) en México?

- |       |                               |
|-------|-------------------------------|
| — — — | AÑOS                          |
| — — — | MESES                         |
| — — — | DÍAS                          |
| 998   | Se rehúsa a contestar (Meses) |
| 999   | No corresponde (Meses)        |

*If B502 is less than LSTMX then LEA: "Esa respuesta es menor que la última vez que el participante fue a México. Por favor verificar respuesta." and siga con P B502.*

*If B502 is equal to 998 or B502 is equal to 999 or B502 is greater than 6, then siga con P B507.*

B503. Cuando usaste Ketamine (Special K, K) en los últimos 6 meses en México, ¿Cómo los usaste?  
**Entrevistador: Si el participante indica que no usó Ketamine en México en los últimos 6 meses, marque No corresponde.**  
(Marque todas las que apliquen)

- Inyectado
- Fumado (chasing)
- Aspirado
- Inhalado
- Tomado
- Rectal (bumping)
- Otro
- No corresponde
- Se rehúsa a contestar

*If B503 is greater than 1 and B503H is equal to 1 then LEA: "Solo puedes escoger la opcion "No corresponde" por si sola, verificar respuesta." and siga con P B503.*

*If B503G is not equal to 1, then siga con P instrucción antes de B505.*

B504. Especifica de que otra manera usaste Ketamine en los últimos 6 meses en México.

-----

*If B503A is not equal to 1, then siga con P instrucción antes de B506.*

B505. Durante los últimos 6 meses cuando usaste Ketamine (Special K, K) en México, en promedio, ¿Qué tan seguido te la inyectaste? (Escoja una)

- |    |                       |
|----|-----------------------|
| 00 | Nunca                 |
| 01 | 1 vez al mes o menos  |
| 02 | 2-3 días al mes       |
| 03 | Una vez a la semana   |
| 04 | 2-3 días a la semana  |
| 05 | 4-6 días a la semana  |
| 06 | Una vez al día        |
| 07 | 2-3 veces al día      |
| 08 | 4 veces o mas por día |
| 98 | Se rehúsa a contestar |

*If B503H is equal to 1 or B503 is equal to 98, then siga con P B507.*

B506. Durante los últimos 6 meses cuando usaste Ketamine (Special K, K) en México, en promedio, ¿Qué tan seguido la usaste de otras maneras (no inyectadas)? (Escoja una)

- |    |                       |
|----|-----------------------|
| 00 | Nunca                 |
| 01 | 1 vez al mes o menos  |
| 02 | 2-3 días al mes       |
| 03 | Una vez a la semana   |
| 04 | 2-3 días a la semana  |
| 05 | 4-6 días a la semana  |
| 06 | Una vez al día        |
| 07 | 2-3 veces al día      |
| 08 | 4 veces o mas por día |
| 98 | Se rehúsa a contestar |

B507. ¿Alguna vez has usado OxyContin en México?

- 1 Si
- 0 No
- 8 Se rehúsa a contestar

*If B507 is not equal to 1, then siga con P B513.*

B508. ¿Cuándo fue la última vez que usaste OxyContin en México?

- \_\_\_ \_\_\_ \_\_\_ AÑOS
- \_\_\_ \_\_\_ \_\_\_ MESES
- \_\_\_ \_\_\_ \_\_\_ DÍAS
- 998 Se rehúsa a contestar (Meses)
- 999 No corresponde (Meses)

*If B508 is less than LSTMX then LEA: "Esa respuesta es menor que la última vez que el participante fue a México. Por favor verificar respuesta." and siga con P B508.*

*If B508 is equal to 998 or B508 is equal to 999 or B508 is greater than 6, then siga con P B513.*

B509. En los últimos 6 meses, cuando usaste oxycontin en México ¿Cómo los usaste?  
**Entrevistador: Si el participante indica que no usó oxycontin en México en los últimos 6 meses, marque No corresponde.**  
(Marque todas las que apliquen)

- Inyectado
- Fumado (chasing)
- Aspirado
- Inhalado
- Tomado
- Rectal (bumping)
- Otro
- No corresponde
- Se rehúsa a contestar

*If B509 is greater than 1 and B509H is equal to 1 then LEA: "Solo puedes escoger la opcion "No corresponde" por si sola, verificar respuesta." and siga con P B509.*

*If B509G is not equal to 1, then siga con P instrucción antes de B511.*

B510. Especifica de que otra manera usaste Oxycontin en los últimos 6 meses en México.

-----

*If B509A is not equal to 1, then siga con P instrucción antes de B512.*

B511. En los últimos 6 meses cuando usaste oxycontin en México, en promedio, ¿Qué tan seguido te lo inyectaste? (Escoja una)

- |    |                       |
|----|-----------------------|
| 00 | Nunca                 |
| 01 | 1 vez al mes o menos  |
| 02 | 2-3 días al mes       |
| 03 | Una vez a la semana   |
| 04 | 2-3 días a la semana  |
| 05 | 4-6 días a la semana  |
| 06 | Una vez al día        |
| 07 | 2-3 veces al día      |
| 08 | 4 veces o mas por día |
| 98 | Se rehúsa a contestar |

*If B509H is equal to 1 or B509 is equal to 98, then siga con P B513.*

B512. En los últimos 6 meses cuando usaste oxycontin en México, en promedio, ¿Qué tan seguido lo usaste de otras maneras (no inyectado)? (Escoja una)

- |    |                       |
|----|-----------------------|
| 00 | Nunca                 |
| 01 | 1 vez al mes o menos  |
| 02 | 2-3 días al mes       |
| 03 | Una vez a la semana   |
| 04 | 2-3 días a la semana  |
| 05 | 4-6 días a la semana  |
| 06 | Una vez al día        |
| 07 | 2-3 veces al día      |
| 08 | 4 veces o mas por día |
| 98 | Se rehúsa a contestar |



B513. ¿Alguna vez has usado opioides de receta (Vicodin, Darvon, Percocet) cuando estuviste en México?

- 1 Si
- 0 No
- 8 Se rehúsa a contestar

*If B513 is not equal to 1, then siga con P B519.*

B514. ¿Cuándo fue la última vez que tomaste opioides de receta (Vicodin, Darvon, Percocet) en México?

- \_\_\_ \_\_ \_ AÑOS
- \_\_\_ \_\_ \_ MESES
- \_\_\_ \_\_ \_ DÍAS
- 998 Se rehúsa a contestar (Meses)
- 999 No corresponde (Meses)

*If B514 is less than LSTMX then LEA: "Esa respuesta es menor que la última vez que el participante fue a México. Por favor verificar respuesta." and siga con P B514.*

*If B514 is equal to 998 or B514 is equal to 999 or B514 is greater than 6, then siga con P B519.*

B515. En los últimos 6 meses, cuando usaste opioides de receta (Vicodin, Darvon, Percocet) en México, ¿Cómo los usaste?

**Entrevistador: Si el participante indica que no usó opioides de receta en México en los últimos 6 meses, marque No corresponde.**

(Marque todas las que apliquen)

- Inyectado
- Fumado (chasing)
- Aspirado
- Inhalado
- Tomado
- Rectal (bumping)
- Otro
- No corresponde
- Se rehúsa a contestar

*If B515 is greater than 1 and B515H is equal to 1 then LEA: "Solo puedes escoger la opcion "No corresponde" por si sola, verificar respuesta." and siga con P B515.*

*If B515G is not equal to 1, then siga con P instrucción antes de B517.*

B516. Especifica de que otra manera has usado opioides de receta (Vicodin, Darvon, Percocet) en los últimos 6 meses en México.

-----

*If B515A is not equal to 1, then siga con P instrucción antes de B518.*

B517. En los últimos 6 meses cuando usaste opioides de receta (Vicodin, Darvon, Percocet) en México, en promedio, ¿Qué tan seguido te los inyectaste? (Escoja una)

- |    |                       |
|----|-----------------------|
| 00 | Nunca                 |
| 01 | 1 vez al mes o menos  |
| 02 | 2-3 días al mes       |
| 03 | Una vez a la semana   |
| 04 | 2-3 días a la semana  |
| 05 | 4-6 días a la semana  |
| 06 | Una vez al día        |
| 07 | 2-3 veces al día      |
| 08 | 4 veces o mas por día |
| 98 | Se rehúsa a contestar |

*If B515H is equal to 1 or B515 is equal to 98, then siga con P B519.*

B518. En los últimos 6 meses cuando usaste opioides de receta (Vicodin, Darvon, Percocet) en México, en promedio, ¿Qué tan seguido lo usaste de otra manera (no inyectado)? (Escoja una)

- 00 Nunca
- 01 1 vez al mes o menos
- 02 2-3 días al mes
- 03 Una vez a la semana
- 04 2-3 días a la semana
- 05 4-6 días a la semana
- 06 Una vez al día
- 07 2-3 veces al día
- 08 4 veces o mas por día
- 98 Se rehúsa a contestar

B519. ¿Alguna vez has usado drogas alucinógenas como ácido, LSD, peyote, mezcalina, o hongos en México?

- 1 Si
- 0 No
- 8 Se rehúsa a contestar

*If B519 is not equal to 1, then siga con P B522.*

B520. ¿Cuándo fue la última vez que usaste drogas alucinógenas como ácido, LSD, peyote, mezcalina, o hongos en México?

- \_\_\_ \_\_ \_ AÑOS
- \_\_\_ \_\_ \_ MESES
- \_\_\_ \_\_ \_ DÍAS
- 998 Se rehúsa a contestar (Meses)
- 999 No corresponde (Meses)

***If B520 is less than LSTMX then LEA: "Esa respuesta es menor que la última vez que el participante fue a México. Por favor verificar respuesta." and siga con P B520.***

***If B520 is equal to 998 or B520 is equal to 999 or B520 is greater than 6, then siga con P B522.***

B521. En los últimos 6 meses, en promedio, que tan seguido usaste drogas alucinógenas como ácido, LSD, peyote, mezcalina, o hongos mientras estabas en México? (Escoja una)

- |    |                       |
|----|-----------------------|
| 00 | Nunca                 |
| 01 | 1 vez al mes o menos  |
| 02 | 2-3 días al mes       |
| 03 | Una vez a la semana   |
| 04 | 2-3 días a la semana  |
| 05 | 4-6 días a la semana  |
| 06 | Una vez al día        |
| 07 | 2-3 veces al día      |
| 08 | 4 veces o mas por día |
| 98 | Se rehúsa a contestar |

B522. ¿Alguna vez has usado inhalantes (goma de pegamento o gasolina) en México?

- |   |                       |
|---|-----------------------|
| 1 | Si                    |
| 0 | No                    |
| 8 | Se rehúsa a contestar |

***If B522 is not equal to 1, then siga con P B525.***

B523. ¿Cuándo fue la última vez que usaste inhalantes (goma de pegamento o gasolina) en México?

- |          |                               |
|----------|-------------------------------|
| __ __ __ | AÑOS                          |
| __ __ __ | MESES                         |
| __ __ __ | DÍAS                          |
| 998      | Se rehúsa a contestar (Meses) |
| 999      | No corresponde (Meses)        |

*If B523 is less than LSTMX then LEA: "Esa respuesta es menor que la última vez que el participante fue a México. Por favor verificar respuesta." and siga con P B523.*

*If B523 is equal to 998 or B523 is equal to 999 or B523 is greater than 6, then siga con P B525.*

B524. Durante los últimos 6 meses, en promedio, ¿qué tan seguido usaste inhalantes como goma de pegamento o gasolina) cuando estuviste en México? (Escoja una)

- |    |                       |
|----|-----------------------|
| 00 | Nunca                 |
| 01 | 1 vez al mes o menos  |
| 02 | 2-3 días al mes       |
| 03 | Una vez a la semana   |
| 04 | 2-3 días a la semana  |
| 05 | 4-6 días a la semana  |
| 06 | Una vez al día        |
| 07 | 2-3 veces al día      |
| 08 | 4 veces o mas por día |
| 98 | Se rehúsa a contestar |

B525. ¿Alguna vez has usado tranquilizantes (Diazepam, Valium, Ativan, Restoril o Rivotril) en México?

- 1 Si
- 0 No
- 8 Se rehúsa a contestar

*If B525 is not equal to 1, then siga con P B531.*

B526. ¿Cuándo fue la última vez que usaste tranquilizantes (Diazepam, Valium, Ativan, Restoril o Rivotril) en México?

- \_\_\_ \_\_ \_ AÑOS
- \_\_\_ \_\_ \_ MESES
- \_\_\_ \_\_ \_ DÍAS
- 998 Se rehúsa a contestar (Meses)
- 999 No corresponde (Meses)

*If B526 is less than LSTMX then LEA: "Esa respuesta es menor que la última vez que el participante fue a México. Por favor verificar respuesta." and siga con P B526.*

*If B526 is equal to 998 or B526 is equal to 999 or B526 is greater than 6, then siga con P B531.*

B527. Si usaste tranquilizantes (Diazepam, Valium, Ativan, Restoril o Rivotril) en los últimos 6 meses cuando estuviste en México, ¿Cómo los usaste?

**Entrevistador: Si el participante indica que no usó tranquilizantes en México en los últimos 6 meses, marque No corresponde.**

(Marque todas las que apliquen)

- Inyectado
- Fumado (chasing)
- Aspirado
- Inhalado
- Tomado
- Rectal (bumping)
- Otro
- No corresponde
- Se rehúsa a contestar

*If B527 is greater than 1 and B527H is equal to 1 then LEA: "Solo puedes escoger la opcion "No corresponde" por si sola, verificar respuesta." and siga con P B527.*

*If B527G is not equal to 1, then siga con P instrucción antes de B529.*

B528. Especifica de que otra manera has usado tranquilizantes (Diazepam, Valium, Ativan, , Restoril o Rivotril) en los últimos 6 meses en México.

-----

*If B527A is not equal to 1, then siga con P instrucción antes de B530.*



B529. Durante los últimos 6 meses, cuando usaste tranquilizantes (Diazepam, Valium, Ativan, Restoril o Rivotril) en promedio ¿Qué tan seguido te inyectaste cuando estuviste en México? (Escoja una)

- |    |                       |
|----|-----------------------|
| 00 | Nunca                 |
| 01 | 1 vez al mes o menos  |
| 02 | 2-3 días al mes       |
| 03 | Una vez a la semana   |
| 04 | 2-3 días a la semana  |
| 05 | 4-6 días a la semana  |
| 06 | Una vez al día        |
| 07 | 2-3 veces al día      |
| 08 | 4 veces o mas por día |
| 98 | Se rehúsa a contestar |

*If B527H is equal to 1 or B527 is equal to 98, then siga con P B531.*

B530. Durante los últimos 6 meses, cuando usaste tranquilizantes (Diazepam, Valium, Ativan, Restoril o Rivotril) en promedio ¿Qué tan seguido los usaste de otras maneras (no inyectada) cuando estuviste en México? (Escoja una)

- 00 Nunca
- 01 1 vez al mes o menos
- 02 2-3 días al mes
- 03 Una vez a la semana
- 04 2-3 días a la semana
- 05 4-6 días a la semana
- 06 Una vez al día
- 07 2-3 veces al día
- 08 4 veces o mas por día
- 98 Se rehúsa a contestar

B531. ¿Alguna vez haz usado barbitúricos (Amytal, Nembutal, o Seconal) en México?

- 1 Si
- 0 No
- 8 Se rehúsa a contestar

*If B531 is not equal to 1, then siga con P B537.*

B532. ¿Cuándo fue la última vez que tomaste barbitúricos (Amytal, Nembutal, o Seconal) en México?

- \_\_\_ \_\_ \_\_ AÑOS
- \_\_\_ \_\_ \_\_ MESES
- \_\_\_ \_\_ \_\_ DÍAS
- 998 Se rehúsa a contestar (Meses)
- 999 No corresponde (Meses)

*If B532 is less than LSTMX then LEA: "Esa respuesta es menor que la última vez que el participante fue a México. Por favor verificar respuesta." and siga con P B532.*

*If B532 is equal to 998 or B532 is equal to 999 or B532 is greater than 6, then siga con P B537.*

B533. Si usaste barbitúricos (Amytal, Nembutal, o Seconal) en los últimos 6 meses mientras estuviste en México, ¿Cómo los usaste?

**Entrevistador: Si el participante indica que no usó barbitúricos en México en los últimos 6 meses, marque No corresponde.**

(Marque todas las que apliquen)

- Inyectado
- Fumado (chasing)
- Aspirado
- Inhalado
- Tomado
- Rectal (bumping)
- Otro
- No corresponde
- Se rehúsa a contestar

*If B533 is greater than 1 and B533H is equal to 1 then LEA: "Solo puedes escoger la opcion "No corresponde" por si sola, verificar respuesta." and siga con P B533.*

*If B533G is not equal to 1, then siga con P instrucción antes de B535.*

B534. Especifica de que otra manera usaste barbitúricos (Amytal, Nembutal, o Seconal) en los últimos 6 meses en México.

-----

*If B533A is not equal to 1, then siga con P instrucción antes de B536.*

B535. Durante los últimos 6 meses, cuando usaste barbitúricos (Amytal, Nembutal, o Seconal) cuando estuviste en México, en promedio ¿Qué tan seguido te los inyectaste? (Escoja una)

- |    |                       |
|----|-----------------------|
| 00 | Nunca                 |
| 01 | 1 vez al mes o menos  |
| 02 | 2-3 días al mes       |
| 03 | Una vez a la semana   |
| 04 | 2-3 días a la semana  |
| 05 | 4-6 días a la semana  |
| 06 | Una vez al día        |
| 07 | 2-3 veces al día      |
| 08 | 4 veces o mas por día |
| 98 | Se rehúsa a contestar |

*If B533H is equal to 1 or B533 is equal to 98, then siga con P B537.*

B536. Durante los últimos 6 meses, cuando usaste barbitúricos (Amytal, Nembutal, o Seconal) cuando estuviste en México, en promedio ¿Qué tan seguido lo usaste de otra manera (no inyectada)? (Escoja una)

- 00 Nunca
- 01 1 vez al mes o menos
- 02 2-3 días al mes
- 03 Una vez a la semana
- 04 2-3 días a la semana
- 05 4-6 días a la semana
- 06 Una vez al día
- 07 2-3 veces al día
- 08 4 veces o mas por día
- 98 Se rehúsa a contestar

B537. ¿Alguna vez has usado píldoras del cerebro (modafilino, nootropicos, ritalin) en México?

- 1 Si
- 0 No
- 8 Se rehúsa a contestar

***If B537 is not equal to 1, then siga con P B543.***

B538. ¿Cuándo fue la última vez que usaste píldoras del cerebro (modafilino, nootropicos, ritalin) en México?

- \_\_\_ \_\_ \_\_ AÑOS
- \_\_\_ \_\_ \_\_ MESES
- \_\_\_ \_\_ \_\_ DÍAS
- 998 Se rehúsa a contestar (Meses)
- 999 No corresponde (Meses)

*If B538 is less than LSTMX then LEA: "Esa respuesta es menor que la última vez que el participante fue a México. Por favor verificar respuesta." and siga con P B538.*

*If B538 is equal to 998 or B538 is equal to 999 or B538 is greater than 6, then siga con P B543.*

B539. Si usaste píldoras del cerebro (nootropicos, modafilino, ritalin) en los últimos 6 meses cuando estuviste en México, ¿Cómo los usaste?

**Entrevistador: Si el participante indica que no usó píldoras del cerebro en México en los últimos 6 meses, marque No corresponde.**

(Marque todas las que apliquen)

- Inyectado
- Fumado (chasing)
- Aspirado
- Inhalado
- Tomado
- Rectal (bumping)
- Otro
- No corresponde
- Se rehúsa a contestar

*If B539 is greater than 1 and B539H is equal to 1 then LEA: "Solo puedes escoger la opcion "No corresponde" por si sola, verificar respuesta." and siga con P B539.*

*If B539G is not equal to 1, then siga con P instrucción antes de B541.*

B540. Especifica otras maneras en las que usaste píldoras del cerebro (nootropicos, modafilino, ritalin) en los últimos 6 meses cuando estuviste en México.

-----

*If B539A is not equal to 1, then siga con P instrucción antes de B542.*

B541. En los últimos 6 meses, cuando usaste píldoras del cerebro (nootropicos, modafilino, ritalin) en México, en promedio ¿Qué tan seguido te inyectabas? (Escoja una)

- |    |                       |
|----|-----------------------|
| 00 | Nunca                 |
| 01 | 1 vez al mes o menos  |
| 02 | 2-3 días al mes       |
| 03 | Una vez a la semana   |
| 04 | 2-3 días a la semana  |
| 05 | 4-6 días a la semana  |
| 06 | Una vez al día        |
| 07 | 2-3 veces al día      |
| 08 | 4 veces o mas por día |
| 98 | Se rehúsa a contestar |

*If B539H is equal to 1 or B539 is equal to 98, then siga con P B543.*

B542. En los últimos 6 meses, cuando usaste píldoras del cerebro (nootropicos, modafilino, ritalin) en México, en promedio ¿Qué tan seguido las usaste de otra manera (no inyectada)? (Escoja una)

- 00 Nunca
- 01 1 vez al mes o menos
- 02 2-3 días al mes
- 03 Una vez a la semana
- 04 2-3 días a la semana
- 05 4-6 días a la semana
- 06 Una vez al día
- 07 2-3 veces al día
- 08 4 veces o mas por día
- 98 Se rehúsa a contestar

B543. ¿Alguna vez has usado otra droga sola (no mencionada anteriormente) en México?**Entrevistador, por favor pregunte sobre sales de baño**

- 1 Si
- 0 No
- 8 Se rehúsa a contestar

*If B543 is not equal to 1, then siga con P B557.*

B544. Por favor especifica la **primera** otra droga que has usado sola cuando estuviste en México.

-----



B545. ¿Cuándo fue la última vez que usaste [Respuesta a P B544] sola en México?

- AÑOS
- MESES
- DÍAS
- 998 Se rehúsa a contestar (Meses)
- 999 No corresponde (Meses)

*If B545 is less than LSTMX then LEA: "Esa respuesta es menor que la última vez que el participante fue a México. Por favor verificar respuesta." and siga con P B545.*

*If B545 is equal to 998 or B545 is equal to 999 or B545 is greater than 6, then siga con P B550.*

B546. Si usaste [Respuesta a P B544] en los últimos 6 meses mientras estuviste en México, ¿Cómo los usaste?

**Entrevistador: Si el participante indica que no usó [Respuesta a P B544] en México en los últimos 6 meses, marque No corresponde.**

(Marque todas las que apliquen)

- Inyectado
- Fumado (chasing)
- Aspirado
- Inhalado
- Tomado
- Rectal (bumping)
- Otro
- No corresponde
- Se rehúsa a contestar

*If B546 is greater than 1 and B546H is equal to 1 then LEA: "Solo puedes escoger la opcion "No corresponde" por si sola, verificar respuesta." and siga con P B546.*

*If B546G is not equal to 1, then siga con P instrucción antes de B548.*

B547. Especifica de que otra manera usaste [Respuesta a P B544] en los últimos 6 meses mientras estuviste en México.

-----

*If B546A is not equal to 1, then siga con P instrucción antes de B549.*

B548. Durante los últimos 6 meses, cuando usaste [Respuesta a P B544] en México, en promedio ¿Qué tan seguido te la inyectaste? (Escoja una)

- |    |                       |
|----|-----------------------|
| 00 | Nunca                 |
| 01 | 1 vez al mes o menos  |
| 02 | 2-3 días al mes       |
| 03 | Una vez a la semana   |
| 04 | 2-3 días a la semana  |
| 05 | 4-6 días a la semana  |
| 06 | Una vez al día        |
| 07 | 2-3 veces al día      |
| 08 | 4 veces o mas por día |
| 98 | Se rehúsa a contestar |

*If B546H is equal to 1 or B546 is equal to 98, then siga con P B550.*

B549. Durante los últimos 6 meses, cuando usaste [Respuesta a P B544] cuando estuviste en México, en promedio ¿Qué tan seguido lo usaste de otra manera (no inyectada)? (Escoja una)

- 00 Nunca
- 01 1 vez al mes o menos
- 02 2-3 días al mes
- 03 Una vez a la semana
- 04 2-3 días a la semana
- 05 4-6 días a la semana
- 06 Una vez al día
- 07 2-3 veces al día
- 08 4 veces o mas por día
- 98 Se rehúsa a contestar

B550. ¿Alguna vez has usado otra droga sola (no mencionada anteriormente) cuando estuviste en México?

- 1 Si
- 0 No
- 8 Se rehúsa a contestar

*If B550 is not equal to 1, then siga con P B557.*

B551. ¿Alguna vez has usado otra droga sola (no mencionada anteriormente) cuando estuviste en México?

-----

B552. ¿Cuándo fue la última vez que usaste [Respuesta a P B551] sola en México?

- AÑOS
- MESES
- DÍAS
- 998 Se rehúsa a contestar (Meses)
- 999 No corresponde (Meses)

*If B552 is less than LSTMX then LEA: "Esa respuesta es menor que la última vez que el participante fue a México. Por favor verificar respuesta." and siga con P B552.*

*If B552 is equal to 998 or B552 is equal to 999 or B552 is greater than 6, then siga con P B557.*

B553. Si usaste [Respuesta a P B551] en los últimos 6 meses mientras estuviste en México, ¿Cómo los usaste?

**Entrevistador: Si el participante indica que no usó [Respuesta a P B551] en México en los últimos 6 meses, marque No corresponde.**

(Marque todas las que apliquen)

- Inyectado
- Fumado (chasing)
- Aspirado
- Inhalado
- Tomado
- Rectal (bumping)
- Otro
- No corresponde
- Se rehúsa a contestar

*If B553 is greater than 1 and B553H is equal to 1 then LEA: "Solo puedes escoger la opcion "No corresponde" por si sola, verificar respuesta." and siga con P B553.*

*If B553G is not equal to 1, then siga con P instrucción antes de B555.*

B554. Especifica de que otra manera usaste [Respuesta a P B551] en los últimos 6 meses mientras estuviste en México.

-----

*If B553A is not equal to 1, then siga con P instrucción antes de B556.*

B555. Durante los últimos 6 meses, cuando usaste [Respuesta a P B551] cuando estuviste en México, en promedio ¿Qué tan seguido te lo inyectaste? (Escoja una)

- |    |                       |
|----|-----------------------|
| 00 | Nunca                 |
| 01 | 1 vez al mes o menos  |
| 02 | 2-3 días al mes       |
| 03 | Una vez a la semana   |
| 04 | 2-3 días a la semana  |
| 05 | 4-6 días a la semana  |
| 06 | Una vez al día        |
| 07 | 2-3 veces al día      |
| 08 | 4 veces o mas por día |
| 98 | Se rehúsa a contestar |

*If B553H is equal to 1 or B553 is equal to 98, then siga con P B557.*

B556. Durante los últimos 6 meses, cuando usaste [Respuesta a P B551] cuando estuviste en México, en promedio ¿Qué tan seguido lo usaste de otra manera (no inyectada)? (Escoja una)

- 00 Nunca
- 01 1 vez al mes o menos
- 02 2-3 días al mes
- 03 Una vez a la semana
- 04 2-3 días a la semana
- 05 4-6 días a la semana
- 06 Una vez al día
- 07 2-3 veces al día
- 08 4 veces o mas por día
- 98 Se rehúsa a contestar

B557. ¿Alguna vez has usado otra combinación de drogas (no mencionada anteriormente) en Mexico?

- 1 Si
- 0 No
- 8 Se rehúsa a contestar

*If B557 is not equal to 1, then siga con P instrucción antes de B571.*

B558. Por favor especifica la **primera** otra combinación de drogas que usaste cuando estuviste en México.

-----

B559. ¿Cuándo fue la última vez que usaste [Respuesta a P B558] sola en México?

- AÑOS
- MESES
- DÍAS
- 998 Se rehúsa a contestar (Meses)
- 999 No corresponde (Meses)

*If B559 is less than LSTMX then LEA: "Esa respuesta es menor que la última vez que el participante fue a México. Por favor verificar respuesta." and siga con P B559.*

*If B559 is equal to 998 or B559 is equal to 999 or B559 is greater than 6, then siga con P B564.*

B560. Cuando usaste [Respuesta a P B558] en los últimos 6 meses mientras estuviste en México, ¿Cómo los usaste?

**Entrevistador: Si el participante indica que no usó [Respuesta a P B558] en México en los últimos 6 meses, marque No corresponde.**

(Marque todas las que apliquen)

- Inyectado
- Fumado (chasing)
- Aspirado
- Inhalado
- Tomado
- Rectal (bumping)
- Otro
- No corresponde
- Se rehúsa a contestar

*If B560 is greater than 1 and B560H is equal to 1 then LEA: "Solo puedes escoger la opcion "No corresponde" por si sola, verificar respuesta." and siga con P B560.*

*If B560G is not equal to 1, then siga con P instrucción antes de B562.*

B561. Especifica de que otra manera usaste [Respuesta a P B558] en los últimos 6 meses mientras estuviste en México.

-----

*If B560A is not equal to 1, then siga con P instrucción antes de B563.*

B562. Durante los últimos 6 meses, cuando usaste [Respuesta a P B558] en México, en promedio ¿Qué tan seguido te lo inyectaste? (Escoja una)

- |    |                       |
|----|-----------------------|
| 00 | Nunca                 |
| 01 | 1 vez al mes o menos  |
| 02 | 2-3 días al mes       |
| 03 | Una vez a la semana   |
| 04 | 2-3 días a la semana  |
| 05 | 4-6 días a la semana  |
| 06 | Una vez al día        |
| 07 | 2-3 veces al día      |
| 08 | 4 veces o mas por día |
| 98 | Se rehúsa a contestar |

*If B560H is equal to 1 or B560 is equal to 98, then siga con P B564.*



B563. Durante los últimos 6 meses, cuando usaste [Respuesta a P B558] cuando estuviste en México, en promedio ¿Qué tan seguido lo usaste de otra manera (no inyectada)? (Escoja una)

- 00 Nunca
- 01 1 vez al mes o menos
- 02 2-3 días al mes
- 03 Una vez a la semana
- 04 2-3 días a la semana
- 05 4-6 días a la semana
- 06 Una vez al día
- 07 2-3 veces al día
- 08 4 veces o mas por día
- 98 Se rehúsa a contestar

B564. ¿Alguna vez has usado otra droga sola (no mencionada anteriormente) cuando estuviste en México?

- 1 Si
- 0 No
- 8 Se rehúsa a contestar

*If B564 is not equal to 1, then siga con P instrucción antes de B571.*

B565. Por favor especifica la **segunda** otra combinación de drogas que usaste cuando estuviste en México.

-----

B566. ¿Cuándo fue la última vez que usaste [Respuesta a P B565] en México?

- AÑOS
- MESES
- DÍAS
- 998 Se rehúsa a contestar (Meses)
- 999 No corresponde (Meses)

*If B566 is less than LSTMX then LEA: "Esa respuesta es menor que la última vez que el participante fue a México. Por favor verificar respuesta." and siga con P B566.*

*If B566 is equal to 998 or B566 is equal to 999 or B566 is greater than 6, then siga con P instrucción antes de B571.*

B567. Cuando usaste [Respuesta a P B565] en los últimos 6 meses mientras estuviste en México, ¿Cómo los usaste?

**Entrevistador: Si el participante indica que no usó [Respuesta a P B565] en México en los últimos 6 meses, marque No corresponde.**

(Marque todas las que apliquen)

- Inyectado
- Fumado (chasing)
- Aspirado
- Inhalado
- Tomado
- Rectal (bumping)
- Otro
- No corresponde
- Se rehúsa a contestar

*If B567 is greater than 1 and B567H is equal to 1 then LEA: "Solo puedes escoger la opción "No corresponde" por si sola, verificar respuesta." and siga con P B567.*

*If B567G is not equal to 1, then siga con P instrucción antes de B569.*

B568. Especifica de que otra manera usaste [Respuesta a P B565] en los últimos 6 meses mientras estuviste en México.

-----

*If B567A is not equal to 1, then siga con P instrucción antes de B570.*

B569. Durante los últimos 6 meses, cuando usaste [Respuesta a P B565] en México, en promedio ¿Qué tan seguido te lo inyectaste? (Escoja una)

- |    |                       |
|----|-----------------------|
| 00 | Nunca                 |
| 01 | 1 vez al mes o menos  |
| 02 | 2-3 días al mes       |
| 03 | Una vez a la semana   |
| 04 | 2-3 días a la semana  |
| 05 | 4-6 días a la semana  |
| 06 | Una vez al día        |
| 07 | 2-3 veces al día      |
| 08 | 4 veces o mas por día |
| 98 | Se rehúsa a contestar |

*If B567H is equal to 1 or B567 is equal to 98, then siga con P instrucción antes de B571.*

B570. Durante los últimos 6 meses, cuando usaste [Respuesta a P B565] cuando estuviste en México, en promedio ¿Qué tan seguido lo usaste de otra manera (no inyectada)? (Escoja una)

- |    |                       |
|----|-----------------------|
| 00 | Nunca                 |
| 01 | 1 vez al mes o menos  |
| 02 | 2-3 días al mes       |
| 03 | Una vez a la semana   |
| 04 | 2-3 días a la semana  |
| 05 | 4-6 días a la semana  |
| 06 | Una vez al día        |
| 07 | 2-3 veces al día      |
| 08 | 4 veces o mas por día |
| 98 | Se rehúsa a contestar |

***ANYINJMX = If(B440 is not equal to 0 and B440 is not equal to 98 and B440 is not equal to "Salto" or B454 is not equal to 0 and B454 is not equal to 98 and B454 is not equal to "Salto" or B457 is not equal to 0 and B457 is not equal to 98 and B457 is not equal to "Salto" or B464 is not equal to 0 and B464 is not equal to 98 and B464 is not equal to "Salto" or B467 is not equal to 0 and B467 is not equal to 98 and B467 is not equal to "Salto" or B470 is not equal to 0 and B470 is not equal to 98 and B470 is not equal to "Salto" or B481 is not equal to 0 and B481 is not equal to 98 and B481 is not equal to "Salto" or B484 is not equal to 0 and B484 is not equal to 98 and B484 is not equal to "Salto" or B490 is not equal to 0 and B490 is not equal to 98 and B490 is not equal to "Salto" or B491 is not equal to 0 and B491 is not equal to 98 and B491 is not equal to "Salto" or B499 is not equal to 0 and B499 is not equal to 98 and B499 is not equal to "Salto" or B505 is not equal to 0 and B505 is not equal to 98 and B505 is not equal to "Salto" or B511 is not equal to 0 and B511 is not equal to 98 and B511 is not equal to "Salto" or B517 is not equal to 0 and B517 is not equal to 98 and B517 is not equal to "Salto" or B529 is not equal to 0 and B529 is not equal to 98 and B529 is not equal to "Salto" or B535 is not equal to 0 and B535 is not equal to 98 and B535 is not equal to "Salto" or B541 is not equal to 0 and B541 is not equal to 98 and B541 is not equal to "Salto" or B548 is not equal to 0 and B548 is not equal to 98 and B548 is not equal to "Salto" or B555 is not equal to 0 and B555 is not equal to 98 and B555 is not equal to "Salto" or B562 is not equal to 0 and B562 is not equal to 98 and B562 is not equal to "Salto" or B569 is not equal to 0 and B569 is not equal to 98 and B569 is not equal to "Salto", 1, 0)***

**LEA: ENTREVISTADOR LEER EN VOZ ALTA: Las siguientes preguntas tienen que ver con las maneras en las que hayas podido inyectarte drogas cuando estuviste en México. Yo sé que ya te había preguntado antes pero me podrías recordar...**

***If LSTMX is greater than 6 and LSTMX is not equal to 998, then siga con P B591.***

B571. Durante los últimos 6 meses cuando estuviste en México, en promedio ¿Qué tan seguido te inyectaste cualquier droga o combinación de drogas? (Escoja una)

- |    |                       |
|----|-----------------------|
| 00 | Nunca                 |
| 01 | 1 vez al mes o menos  |
| 02 | 2-3 días al mes       |
| 03 | Una vez a la semana   |
| 04 | 2-3 días a la semana  |
| 05 | 4-6 días a la semana  |
| 06 | Una vez al día        |
| 07 | 2-3 veces al día      |
| 08 | 4 veces o mas por día |
| 98 | Se rehúsa a contestar |

B572. De las veces que se inyectó en los **últimos 6 meses cuando estuviste en México**, ¿qué tan seguido le dio, rentó, prestó a alguien una jeringa que usted ya había usado? (Escoja una)

- |   |                            |
|---|----------------------------|
| 1 | Nunca                      |
| 2 | A veces                    |
| 3 | Casi la mitad de las veces |
| 4 | Seguido                    |
| 5 | Siempre                    |
| 8 | Se rehúsa a contestar      |

B573. De las veces que se inyectó en los **últimos 6 meses cuando estuviste en México**, ¿qué tan seguido uso una jeringa que usted sabía o sospechaba que alguien más ya la había usado? (Escoja una)

- |   |                            |
|---|----------------------------|
| 1 | Nunca                      |
| 2 | A veces                    |
| 3 | Casi la mitad de las veces |
| 4 | Seguido                    |
| 5 | Siempre                    |
| 8 | Se rehúsa a contestar      |

*If B573 is equal to 1 or B573 is equal to 8, then siga con P B576.*

B574. Durante la última vez que se inyectó drogas en México, ¿uso una jeringa que usted sabía o sospechaba hubiera sido usada por alguien más?

- |   |                       |
|---|-----------------------|
| 1 | Si                    |
| 0 | No                    |
| 8 | Se rehúsa a contestar |

B575. De las veces en los **últimos 6 meses** que se inyectó en México con una jeringa que ya había sido usada por alguien más, ¿qué tan seguido limpió la jeringa con cloro antes de usarla? (Escoja una)

- |   |                          |
|---|--------------------------|
| 1 | Nunca                    |
| 2 | A veces                  |
| 3 | Casi la mitad del tiempo |
| 4 | Seguido                  |
| 5 | Siempre                  |
| 8 | Se rehúsa a contestar    |

B576. De las veces que se inyectó en México con otras personas en los **últimos 6 meses**, ¿qué tan seguido ha dividido drogas con alguien más usando una jeringa? Esto también es conocido como backloading, piggybacking o dividir drogas mojadas. (Escoja una)

- 1 Nunca
- 2 A veces
- 3 Casi la mitad del tiempo
- 4 Seguido
- 5 Siempre
- 8 Se rehúsa a contestar

B577. De las veces que se inyectó en los **últimos 6 meses mientras estuvo en México**, ¿qué tan seguido usó un cacharro, algodón o agua de enjuague con alguien o después que alguien más ya lo había usado? (Escoja una)

- 1 Nunca
- 2 A veces
- 3 Casi la mitad del tiempo
- 4 Seguido
- 5 Siempre
- 8 Se rehúsa a contestar

B578. De las veces que se inyectó en los **últimos 6 meses mientras estuviste en México**, ¿qué tan seguido compró drogas que ya venían preparadas en la jeringa? (Escoja una)

- 1 Nunca
- 2 A veces
- 3 Casi la mitad del tiempo
- 4 Seguido
- 5 Siempre
- 8 Se rehúsa a contestar

B579. De las veces que se inyectó en los **últimos 6 meses mientras estuviste en México**, ¿qué tan seguido se inyectó con una jeringa nueva, estéril? (Escoja una)

- 1 Nunca
- 2 A veces
- 3 Casi la mitad del tiempo
- 4 Seguido
- 5 Siempre
- 8 Se rehúsa a contestar

B580. En los últimos 6 meses que se inyectó drogas mientras estuvo en México, ¿dónde consiguió la jeringa que Ud. uso para inyectarse drogas? (Marque todas las que apliquen)

- Farmacia
- Esposo (a), familiar, o pareja sexual
- Amigo (a)
- Un Traficante
- Doctor que ayuda a inyectarse a cambio de drogas o dinero
- Picadero
- Intercambio de Jeringas (usted lo cambió)
- De alguien que los obtiene de un intercambio de Jeringas
- Comprada en la calle
- Doctor / clínica / hospital
- Clínica Veterinaria/ tienda de mascotas
- Mercado/Tienda
- Encontrada en el suelo o la basura
- Otro lugar
- Se rehúsa a contestar



***If B580N is not equal to 1, then siga con P instrucción antes de B582.***

B581. Por favor especifique en qué otro lugar usted consiguió las jeringas en los últimos 6 meses mientras estuvo en México.

-----

***If B580A + B580B + B580C + B580D + B580E + B580F + B580G + B580H + B580I + B580J + B580K + B580L + B580M + B580N is equal to 1 or B580 is equal to 98, then siga con P instrucción antes de B584.***

B582. En los últimos 6 meses mientras estuvo en México, ¿dónde consiguió sus jeringas más seguido? (Escoja una)

- 01 Farmacia
- 02 Esposo (a), familiar, o pareja sexual
- 03 Amigo (a)
- 04 Un Traficante
- 05 Doctor que ayuda a inyectarse a cambio de drogas o dinero
- 06 Picadero
- 07 Intercambio de Jeringas (usted lo cambió)
- 08 De alguien que los obtiene de un intercambio de Jeringas
- 09 Comprada en la calle
- 10 Doctor / clínica / hospital
- 11 Clínica Veterinaria/ tienda de mascotas
- 12 Mercado/Tienda
- 13 Encontrada en el suelo o la basura
- 14 Otro lugar
- 98 Se rehúsa a contestar

***If B582 is equal to 1 and B580A is not equal to 1 or B582 is equal to 2 and B580B is not equal to 1 or B582 is equal to 3 and B580C is not equal to 1 or B582 is equal to 4 and B580D is not equal to 1 or B582 is equal to 5 and B580E is not equal to 1 or B582 is equal to 6 and B580F is not equal to 1 or B582 is equal to 7 and B580G is not equal to 1 or B582 is equal to 8 and B580H is not equal to 1 or B582 is equal to 9 and B580I is not equal to 1 or B582 is equal to 10 and B580J is not equal to 1 or B582 is equal to 11 and B580K is not equal to 1 or B582 is equal to 12 and B580L is not equal to 1 or B582 is equal to 13 and B580M is not equal to 1 or B582 is equal to 14 and B580N is not equal to 1 then LEA: "El participante solo puede elegir el lugar con más frecuencia de entre los lugares nombrados anteriormente." and siga con P B582.***

***If B582 is not equal to 14, then siga con P instrucción antes de B584.***

B583. Por favor especifique en qué lugar usted consiguió sus jeringas más seguido, en los últimos 6 meses mientras estuvo en México.

-----

***If B580G is equal to 1 or B582 is equal to 7 then siga con P B584***

***If not, then siga con P instrucción antes de B586.***

B584. En los últimos 6 meses, cuando estuviste en México, ¿cuántas jeringas estériles y limpias obtenías por visita al intercambio de jeringas en promedio?

-----

998 Se rehúsa a contestar

***If B584 is equal to 0 or B584 is equal to 998, then siga con P instrucción antes de B586.***

B585. ¿Cuál es el nombre del programa de intercambio de jeringa de donde obtuviste tus jeringas más seguido en México?

-----

***If B580A is equal to 1 or B582 is equal to 1 then siga con P B586***

***If not, then siga con P B588.***

B586. En los últimos 6 meses, cuando estuviste en México, ¿cuántas jeringas estériles y limpias obtuviste en cada visita a la farmacia en promedio?

-----

998 Se rehúsa a contestar

***If B586 is equal to 0 or B586 is equal to 998, then siga con P B588.***

B587. ¿Cuál es el nombre de la farmacia en la que compraste jeringas más seguido en México?

-----

B588. En los últimos 6 meses mientras estuvo en México, cuando se inyectaba drogas ¿qué tan difícil o fácil fue conseguir jeringas nuevas, que no han sido usadas? (Escoja una)

- 1 Nunca ha tratado de conseguir jeringas nuevas que no han sido usadas
- 2 Bastante fácil
- 3 Fácil
- 4 Difícil
- 5 Bastante difícil
- 8 Se rehúsa a contestar

***If B588 is equal to 4 or B588 is equal to 5 then siga con P B589***

***If not, then siga con P B591.***

B589. ¿Cuál fue la razón principal por la que fue difícil conseguir jeringas nuevas, que no han sido usadas mientras estuvo en México? (Escoja una)

- 01 No sabia donde obtenerlas
- 02 Cuestan demasiado/ No tengo dinero para comprarlas
- 03 No hay ningún sitio donde comprar jeringas legalmente/ la tienda no me las vende
- 04 No hay ningún lugar de intercambio de jeringas
- 05 Me da miedo que me encuentren /arresten la policía por llevar jeringas
- 06 La farmacia/tienda estaba cerrada
- 07 Otro
- 97 No sé
- 98 Se rehúsa a contestar

***If B589 is not equal to 7, then siga con P B591.***

B590. Por favor especifique cuál fue la otra razón por la cual fue difícil conseguir jeringas nuevas, que no han sido usadas mientras estuvo en México.

-----

B591. ¿Ha tenido alguna ayuda de alguien más (como un hit doctor) para inyectarse drogas cuando Ud. estaba en México?

- 1 Si
- 0 No
- 8 Se rehúsa a contestar

***If B591 is not equal to 1, then siga con P B594.***

B592. ¿Cuándo fue la última vez que alguien le ayudó a inyectarse drogas mientras estuvo en México?

- \_\_\_ \_\_\_ MESES
- \_\_\_ \_\_\_ SEMANAS
- \_\_\_ \_\_\_ DÍAS
- 998 Se rehúsa a contestar (Meses)

***If B592 is less than LSTMX then LEA: "Esa respuesta es menor que la última vez que el participante fue a México. Por favor verificar respuesta." and siga con P B592.***

***If B592 is equal to 998 or B592 is equal to 999 or B592 is greater than 6, then siga con P B594.***

B593. En los últimos 6 meses cuando estuvo en México, ¿qué tan seguido se ha inyectado con la ayuda de alguien? (Escoja una)

- 1 Siempre
- 2 Con frecuencia
- 3 A veces
- 4 Casi nunca
- 8 Se rehúsa a contestar

B594. Por favor, seleccione el tipo de moneda en el que usted sabe que cuesta la droga en Mexico. (Escoja una)

- 1 Pesos
- 2 Dólares
- 8 Se rehúsa a contestar

*If B594 is equal to 2 then siga con P B595*

*If not, then siga con P instrucción antes de B610.*

B595. En dólares ¿Cuánto cuesta comprar una dosis de Heroína en goma/Goma negra (la negra) sola en México?

- — — dólares
- 997 No sé
- 998 Se rehúsa a contestar

B596. En dólares ¿Cuánto cuesta comprar una dosis de heroína en polvo sola en México?

- — — dólares
- 997 No sé
- 998 Se rehúsa a contestar

B597. En dólares ¿Cuánto cuesta comprar una dosis de cocaína (crack) sola en México?

- — — dólares
- 997 No sé
- 998 Se rehúsa a contestar

B598. En dólares ¿Cuánto cuesta comprar una dosis de cocaína (polvo) en México?

- — — dólares
- 997 No sé
- 998 Se rehúsa a contestar

B599. En dólares ¿Cuánto cuesta comprar una dosis de heroína y cocaína juntas (speedball) en México?

- — — dólares
- 997 No sé
- 998 Se rehúsa a contestar

B600. En dólares ¿Cuánto cuesta comprar una dosis de metanfetamina/cristal sola en México?

- — — dólares
- 997 No sé
- 998 Se rehúsa a contestar

B601. En dólares ¿Cuánto cuesta comprar una dosis de China White en México?

- — — dólares
- 997 No sé
- 998 Se rehúsa a contestar

B602. En dólares ¿Cuánto cuesta comprar una dosis de OxyContin sin receta en México?

|       |                       |
|-------|-----------------------|
| — — — | dólares               |
| 997   | No sé                 |
| 998   | Se rehúsa a contestar |

B603. En dólares ¿Cuánto cuesta comprar una dosis de otros opiáceos controlados sin receta (Vicodin, Darvon, Percocet) en México?

|       |                       |
|-------|-----------------------|
| — — — | dólares               |
| 997   | No sé                 |
| 998   | Se rehúsa a contestar |

B604. En dólares ¿Cuánto cuesta comprar una dosis de tranquilizantes (Rivotril, Diazepam, Valium, Ativan o Restoril) en México?

|       |                       |
|-------|-----------------------|
| — — — | dólares               |
| 997   | No sé                 |
| 998   | Se rehúsa a contestar |

B605. En dólares ¿Cuánto cuesta comprar una dosis de barbitúricos sin receta (Amytal, Nembutal y Seconal) en México?

|       |                       |
|-------|-----------------------|
| — — — | dólares               |
| 997   | No sé                 |
| 998   | Se rehúsa a contestar |

B606. En dólares ¿Cuánto cuesta comprar una dosis de fentanilo (fentanyl) en México?

|       |                       |
|-------|-----------------------|
| — — — | dólares               |
| 997   | No sé                 |
| 998   | Se rehúsa a contestar |

B607. ¿Conoce el costo en dólares de Otras drogas o combinaciones que no se haya mencionado en la lista anterior en México?

- 1 Si
- 0 No
- 8 Se rehúsa a contestar

*If B607 is not equal to 1, then siga con P instrucción antes de B610.*

B608. En dólares ¿Cuánto cuesta comprar una dosis de otras drogas o combinaciones que no se haya mencionado en la lista anterior en México?

- — — dólares
- 997 No sé
- 998 Se rehúsa a contestar

*If B608 is greater than 0 and B608 is not equal to 998 then siga con P B609*

*If not, then siga con P instrucción antes de B610.*

B609. Otra droga o combinacion de la que diste costo anteriormente

-----

*If B594 is equal to 1 then siga con P B610*

*If not, then siga con P B625.*

B610. En pesos ¿Cuánto cuesta comprar una dosis de Heroína en goma/Goma negra (la negra) sola en México?

- — — pesos
- 997 No sé
- 998 Se rehúsa a contestar



B611. En pesos ¿Cuánto cuesta comprar una dosis de heroína en polvo sola en México?

- — — pesos
- 997 No sé
- 998 Se rehúsa a contestar

B612. En pesos ¿Cuánto cuesta comprar una dosis de cocaína (crack) sola en México?

- — — pesos
- 997 No sé
- 998 Se rehúsa a contestar

B613. En pesos ¿Cuánto cuesta comprar una dosis de cocaína (polvo) en México?

- — — pesos
- 997 No sé
- 998 Se rehúsa a contestar

B614. En pesos ¿Cuánto cuesta comprar una dosis de heroína y cocaína juntas (speedball) en México?

- — — pesos
- 997 No sé
- 998 Se rehúsa a contestar

B615. En pesos ¿Cuánto cuesta comprar una dosis de metanfetamina/cristal sola en México?

- — — pesos
- 997 No sé
- 998 Se rehúsa a contestar

B616. En pesos ¿Cuánto cuesta comprar una dosis de China White en México?

- — — pesos
- 997 No sé
- 998 Se rehúsa a contestar

B617. En pesos ¿Cuánto cuesta comprar una dosis de OxyContin sin receta en México?

- — — pesos
- 997 No sé
- 998 Se rehúsa a contestar

B618. En pesos ¿Cuánto cuesta comprar una dosis de otros opiáceos controlados sin receta (Vicodin, Darvon, Percocet) en México?

- — — pesos
- 997 No sé
- 998 Se rehúsa a contestar

B619. En pesos ¿Cuánto cuesta comprar una dosis de tranquilizantes (Rivotril, Diazepam, Valium, Ativan o Restoril) en México?

- — — pesos
- 997 No sé
- 998 Se rehúsa a contestar

B620. En pesos ¿Cuánto cuesta comprar una dosis de barbitúricos sin receta (Amytal, Nembutal o Seconal) en México?

- — — pesos
- 997 No sé
- 998 Se rehúsa a contestar

B621. En pesos ¿Cuánto cuesta comprar una dosis de fentanilo (fentanyl) en México?

- — — pesos
- 997 No sé
- 998 Se rehúsa a contestar

B622. ¿Conoce el costo en pesos de Otras drogas o combinaciones que no se haya mencionado en la lista anterior en México?

- 1 Si
- 0 No
- 8 Se rehúsa a contestar

*If B622 is not equal to 1, then siga con P B625.*

B623. En pesos ¿Cuánto cuesta comprar una dosis de otras drogas o combinaciones que no se haya mencionado en la lista anterior en México?

- — — pesos
- 997 No sé
- 998 Se rehúsa a contestar

*If B623 is greater than 0 and B623 is not equal to 998 then siga con P B624*

*If not, then siga con P B625.*

B624. Otra droga o combinacion de la que diste costo anteriormente

-----

PREGUNTAS DE INICIACION DE INYECCION

B625. ¿Alguna vez le has ayudado a inyectarse alguien que nunca antes se había inyectado?

- 1 Si
- 0 No
- 8 Se rehúsa a contestar

*If B625 is not equal to 1, then siga con P instrucción antes de B641.*

B626. ¿A cuántas personas has ayudado a inyectarse por primera vez?

- — — —
- 9998 Se rehúsa a contestar

B627. ¿Cuáles han sido las razones por las que has ayudado a alguien a inyectarse por primera vez? (Marque todas las que apliquen)

- Compartí drogas con ellos
- "Hit doctor" (me pagaron para ayudarlos a inyectarse)
- Quería compartir la experiencia
- Ellos no sabían cómo inyectarse
- Ellos estaban muy tembloroso o nerviosos para inyectarse
- Otro
- Se rehúsa a contestar

*If B627F is not equal to 1, then siga con P B629.*

B628. Por favor especifique, otra razón.

-----

B629. A quien has ayudado a inyectarse por primera vez? (Marque todas las que apliquen)

- Hermano(a)
- Pareja sexual casual
- Pareja sexual comercial
- Novio(a) o esposo(a)
- Hijo(a)
- Les vendí drogas
- Les vendí jeringas
- Amigo(a)
- Conocido(a)
- Desconocido(a)
- Compañero en la Prisión
- Otro
- Se rehúsa a contestar

*If B629L is not equal to 1, then siga con P B631.*

B630. Por favor especifique, otra relación

-----

B631. ¿En los últimos seis meses has ayudado a alguien a inyectarse por primera vez? (Escoja una)

- 1 Si
- 0 No
- 8 Se rehúsa a contestar

*If B631 is not equal to 1, then siga con P instrucción antes de B641.*

B632. ¿A cuántas diferentes personas?

\_\_ \_\_ \_\_ \_\_

personas

9998

Se rehúsa a contestar

***If B632 is greater than B626 and B632 is not equal to 9998 then LEA: "La respuesta es mayor que el número total. Por favor, verifique las respuesta." and siga con P B632.***

B633. ¿Cuántas de las personas a las que les ayudaste viven en México?

\_\_ \_\_ \_\_ \_\_

personas

9998

Se rehúsa a contestar

***If B633 is greater than B632 and B633 is not equal to 9998 then LEA: "La respuesta es mayor que el número total. Por favor, verifique las respuesta." and siga con P B633.***

B634. ¿Cuántas de las personas a las que les ayudaste viven en Estados Unidos?

\_\_ \_\_ \_\_ \_\_

personas

9998

Se rehúsa a contestar

***If B633 is not equal to 9998 and B634 is not equal to 9998 and B633 + B634 is greater than B632 then LEA: "La suma de dos respuestas es mayor que el número total. Por favor, verifique las respuesta." and siga con P B634.***

B635. ¿Cuál era el sexo de esta(s) persona(s)? (Marque todas las que apliquen)

\_\_

Hombre

\_\_

Mujer

\_\_

Transgenero

\_\_

Se rehúsa a contestar

B636. ¿Cuáles fueron los motivos por que en los últimos 6 meses has ayudado a alguien a inyectarse que nunca se habia inyectado? **Lea las lista y marque todas las que apliquen.** (Marque todas las que apliquen)

- Compartí drogas con ellos
- "Hit doctor" (me pagaron para ayudarlos a inyectarse )
- Quería compartir la experiencia
- No sabían como inyectarse
- Estaban muy temblorosos o nerviosos para inyectarse
- Otro
- Se rehúsa a contestar

***If B636F is not equal to 1, then siga con P B638.***

B637. Por favor especifique, otra razón.

-----

B638. Si en los últimos 6 meses ayudaste a alguien a inyectarse por primera vez, ¿cuál era tu relación con esa(s) persona(s)? (Marque todas las que apliquen)

- Hermano(a)
- Pareja sexual casual
- Pareja sexual comercial
- Novio(a) o esposo(a)
- Hijo(a)
- Les vendí drogas
- Les vendí jeringas
- Amigo(a)
- Conocido(a)
- Desconocido(a)
- Compañero en la Prisión
- Otro
- Se rehúsa a contestar

***If B638L is not equal to 1, then siga con P B640.***

B639. Por favor especifique, otra relación

-----

B640. En los últimos 6 meses, ¿compartiste jeringas con alguien a quien le ayudaste a inyectarse que nunca se había inyectado?

- 1 Si
- 0 No
- 8 Se rehúsa a contestar

***LEA: LEER: Las siguientes preguntas son sobre qué tan hábiles son las personas para practicar ciertos comportamientos. Por favor responde de la manera que sea de acuerdo a ti.***



B641. Puedo evitar inyectarme con una jeringa que alguien más usó, incluso si estoy inyectándome con personas que conozco bien. (Escoja una)

- 1 Absolutamente seguro que NO PUEDO
- 2 Muy seguro que NO PUEDO
- 3 Muy seguro que SI PUEDO
- 4 Absolutamente seguro que SI PUEDO
- 8 Se rehúsa a contestar

B642. Puedo evitar inyectarme con una jeringa que alguien más usó, incluso si estoy dopado, enfermo con la malilla. (Escoja una)

- 1 Absolutamente seguro que NO PUEDO
- 2 Muy seguro que NO PUEDO
- 3 Muy seguro que SI PUEDO
- 4 Absolutamente seguro que SI PUEDO
- 8 Se rehúsa a contestar

B643. Puedo evitar usar un cacharro, algodón, o agua de enjuague que alguien más usó, incluso si estoy inyectándome con personas que conozco bien. (Escoja una)

- 1 Absolutamente seguro que NO PUEDO
- 2 Muy seguro que NO PUEDO
- 3 Muy seguro que SI PUEDO
- 4 Absolutamente seguro que SI PUEDO
- 8 Se rehúsa a contestar

B644. Puedo evitar inyectarme con la jeringa de mi pareja de inyeccion, incluso si antes hemos compartido jeringas. (Escoja una)

- 1 Absolutamente seguro que NO PUEDO
- 2 Muy seguro que NO PUEDO
- 3 Muy seguro que SI PUEDO
- 4 Absolutamente seguro que SI PUEDO
- 8 Se rehúsa a contestar

B645. Puedo evitar usar el cacharro, algodón o agua de enjuague de mi pareja, incluso si antes los hemos compartido. (Escoja una)

- 1 Absolutamente seguro que NO PUEDO
- 2 Muy seguro que NO PUEDO
- 3 Muy seguro que SI PUEDO
- 4 Absolutamente seguro que SI PUEDO
- 8 Se rehúsa a contestar

B646. Puedo evitar inyectarme con una jeringa que alguien más usó, incluso si he tenido sexo sin condón con esa persona. (Escoja una)

- 1 Absolutamente seguro que NO PUEDO
- 2 Muy seguro que NO PUEDO
- 3 Muy seguro que SI PUEDO
- 4 Absolutamente seguro que SI PUEDO
- 8 Se rehúsa a contestar

**EXPERIENCIAS DE SOBREDOSIS**

**LEA:** *LEA: Las siguientes preguntas son acerca de sobredosis. Cuando digo sobredosis, me refiero a una situación en la que usted haya desmayado y no haya podido despertarse o sus labios se le pusieron azules.*

B647. En toda su vida, ¿cuántas veces ha tenido una sobredosis?

- |             |                       |                                           |
|-------------|-----------------------|-------------------------------------------|
| ___ ___ ___ | veces                 |                                           |
| 997         | No sé                 | <i>Siga con P instrucción antes de Q1</i> |
| 998         | Se rehúsa a contestar | <i>Siga con P instrucción antes de Q1</i> |

*If B647 is equal to 0, then siga con P B677.*

*If NDT\_TJ is equal to 1, then siga con P instrucción antes de B649.*

B648. De esas veces que tuvo sobredosis, ¿Cuántas veces ocurrieron en EUA?

- |             |                       |                                           |
|-------------|-----------------------|-------------------------------------------|
| ___ ___ ___ | veces                 |                                           |
| 997         | No sé                 | <i>Siga con P instrucción antes de Q1</i> |
| 998         | Se rehúsa a contestar | <i>Siga con P instrucción antes de Q1</i> |
| 999         | No corresponde        | <i>Siga con P instrucción antes de Q1</i> |

*If B648 is greater than B647 and B648 is not equal to 997 and B648 is not equal to 998 and B648 is not equal to 999 then LEA: "Esa respuesta es mayor que la cantidad de sobredosis en la vida del participante. Por favor revise la respuesta." and siga con P B648.*

*If NDT\_SD is equal to 1, then siga con P B650.*

B649. De esas veces que tuvo sobredosis, ¿Cuántas veces ocurrieron en México?

- |             |                       |                                           |
|-------------|-----------------------|-------------------------------------------|
| ___ ___ ___ | veces                 |                                           |
| 997         | No sé                 | <i>Siga con P instrucción antes de Q1</i> |
| 998         | Se rehúsa a contestar | <i>Siga con P instrucción antes de Q1</i> |
| 999         | No corresponde        | <i>Siga con P instrucción antes de Q1</i> |

***If B649 is greater than B647 and B649 is not equal to 997 and B649 is not equal to 998 and B649 is not equal to 999 then LEA: "Esa respuesta es mayor que la cantidad de sobredosis en la vida del participante. Por favor revise la respuesta." and siga con P B649.***

B650. En los últimos **6 MESES**, ¿cuántas veces ha tenido una sobredosis?

— — veces

97 No sé ***Siga con P instrucción antes de Q1***

98 Se rehúsa a contestar ***Siga con P instrucción antes de Q1***

***If B650 is greater than B647 and B650 is not equal to 97 and B650 is not equal to 98 then LEA: "Esa respuesta es mayor que la cantidad de sobredosis en la vida del participante. Por favor revise la respuesta." and siga con P B650.***

***If B650 is equal to 0, then siga con P instrucción antes de B659.***

B651. ¿En qué ciudad tuvo la sobredosis más reciente? (Escoja una)

- 1 Condado de San Diego
- 2 Tijuana
- 3 Otra ciudad en E.E.U.U
- 4 Otra ciudad en México
- 5 Otro país (no EUA o México)
- 7 No sé
- 8 Se rehúsa a contestar

***If B651 is equal to 5 then siga con P B652***

***If not, then siga con P B653.***

B652. Por favor especifique en qué otro país (no EUA o Mexico) tuvo esta sobredosis más reciente

-----

B653. ¿Qué drogas estaba usando la **última vez** que tuvo una sobredosis? (Marque todas las que apliquen)

- Alcohol
- Marihuana
- Heroína/Goma negra (la negra) sola
- Heroína en polvo
- Cocaína crack sola
- Cocaína sola (en polvo)
- Heroína y cocaína juntas (speedball)
- Metanfetamina/cristal sola
- Metanfetamina/cristal y heroína juntas
- China White sola
- China White y heroína juntas
- China White y fentanilo juntas
- China White y cristal/metanfetamina juntas
- PCP
- Drogas alucinógenas como ácido, LSD, peyote, mezcalina, hongos
- Inhalantes (por ejemplo, goma, gasolina, diluyente de pintura, agua celeste u otros químicos)
- Tranquilizantes sin receta (Rivotril, Diazepam, Valium, Ativan o Restoril)
- OxyContin, Sin receta
- Otros opioides controlados sin receta (Vicodin, Darvono Percocet)
- Barbitúricos sin receta (Amytal, Nembutal, o Seconal)
- Fentanilo and cocaína juntas
- Fentanilo and heroína juntas

- Fentanilo and Metanfetaminas/cristal juntas
- Otra droga o combinación de drogas que no se ha mencionado aún
- No sé
- Se rehúsa a contestar

***If B653X is equal to 1 then siga con P B654***

***If not, then siga con P B655.***

B654. Por favor especifique qué otra droga o combinación de drogas usó la última vez que tuvo una sobredosis.

-----

B655. ¿Cuál de las drogas que Ud. uso el día de su última sobredosis se inyectó? (Marque todas las que apliquen)

- Heroína negra/Goma negra (la negra) sola
- Heroína en polvo
- Cocaína crack sola
- Cocaína sola (en polvo)
- Heroína y cocaína juntas (speedball)
- Metanfetamina/cristal sola
- Metanfetamina/cristal y heroína juntas
- China White sola
- China White y heroína juntas
- China White y fentanilo juntas
- China White y cristal/metanfetamina juntas
- PCP
- Drogas alucinógenas como ácido, LSD, peyote, mezcalina, hongos
- Inhalantes (por ejemplo, goma, gasolina, diluyente de pintura, agua celeste u otros químicos)
- Tranquilizantes sin receta (Rivotril, Diazepam, Valium, Ativan o Restoril)
- OxyContin, Sin receta
- Otros opioides controlados sin receta (Vicodin, Darvono Percocet)
- Barbitúricos sin receta (Amytal, Nembutal, y Seconal)
- Fentanilo and cocaína juntas
- Fentanilo and heroína juntas
- Fentanilo and Metanfetaminas/cristal juntas
- Fentanilo and china white juntas

- \_\_\_ Otra droga o combinación de drogas que no se ha mencionado aún
- \_\_\_ No sé
- \_\_\_ Se rehúsa a contestar

***If B655W is equal to 1 then siga con P B656***

***If not, then siga con P B657.***

B656. Por favor especifique qué otra droga o combinación de drogas se inyectó la última vez que tuvo una sobredosis.

-----

B657. En los últimos 30 días antes a la sobredosis que usted acaba de describir ¿había estado en custodia (prison, cárcel, o centro de detención) por 3 días o más?

- 1 Si
- 0 No
- 8 Se rehúsa a contestar

B658. En los últimos 30 días antes a la sobredosis que usted acaba de describir ¿había dejado de usar drogas por 3 días o más porque estaba en tratamiento para su uso de drogas o por otra razón?

- 1 Si
- 0 No
- 8 Se rehúsa a contestar

***LEA: LEER: Naoloxona es una medicina que se puede usar para revertir una sobredosis.***

B659. **¿Habías escuchado sobre naloxona antes del día de hoy?**  
(Escoja una)

- 1 Si
- 2 No
- 3 No estoy seguro-a
- 8 Se rehúsa a contestar

***If B659 is not equal to 1, then siga con P B676.***



B660. ¿Alguna vez en su vida ha tenido que usar naloxona en usted mismo? (Escoja una)

- 1 Si
- 2 No
- 3 No estoy seguro-a
- 8 Se rehúsa a contestar

***If B660 is not equal to 1, then siga con P B662.***

B661. ¿Cuántas veces le tuvo que usar naloxona en usted mismo en los últimos 6 meses?

- — — veces
- 998 Se rehúsa a contestar

B662. ¿Alguien vez en su vida más le ha tenido que usar Naloxone en usted? (Escoja una)

- 1 Si
- 2 No
- 3 No estoy seguro-a
- 8 Se rehúsa a contestar

***If B662 is not equal to 1, then siga con P B664.***

B663. ¿Cuántas veces alguien más le tuvo que usarle Naloxona a Ud. en los últimos 6 meses?

- — — veces
- 998 Se rehúsa a contestar

B664. ¿Alguna vez en su vida Ud. le tuvo que user Naloxona a alguien más? (Escoja una)

- 1 Si
- 2 No
- 3 No estoy seguro-a
- 8 Se rehúsa a contestar

***If B664 is not equal to 1, then siga con P B666.***

B665. ¿Cuántas veces le tuvo que usar naloxona a alguien más en los últimos 6 meses?

\_\_\_ \_\_\_ \_\_\_ veces  
998 Se rehúsa a contestar

B666. ¿Trae con Ud. Naloxona ahora mismo?

1 Si  
0 No  
8 Se rehúsa a contestar

B667. ¿Dónde consiguió la última naloxona? (Escoja una)

- 01 Programa de intercambio de Jeringas
- 02 En Punto
- 03 PrevenCasa
- 04 Centro de Salud de la Comunidad
- 05 Farmacia
- 06 Centro de rehabilitación de drogas
- 07 N/C (nunca conseguí Naloxona)
- 08 Otro
- 98 Se rehúsa a contestar

***If B667 is not equal to 8, then siga con P B669.***

B668. Por favor especifique de dónde consiguió la última naloxona

-----

B669. ¿Cómo pagó por la última naloxona que consiguió? (Escoja una)

- 1 en dólares estadounidenses
- 2 en pesos
- 3 en otra forma de pago
- 4 no pagó (cero)
- 8 Se rehúsa a contestar

*If B669 is not equal to 1, then siga con P instrucción antes de B671.*

B670. ¿Cuánto pagó por la última naloxona en dólares?    \_\_\_ \_\_\_

- 998 Se rehúsa a contestar

*If B669 is not equal to 2, then siga con P instrucción antes de B672.*

B671. ¿Cuánto pagó por la última naloxona en pesos?    \_\_\_ \_\_\_ \_\_\_

- 9998 Se rehúsa a contestar

*If B669 is not equal to 3, then siga con P B673.*

B672. Por favor especifique otra forma de pago.

-----

**B673. En los últimos 6 meses, que tan seguido tuviste naloxona contigo donde pudieras obtenerla dentro/en menos de 5 minutos? (Escoja una)**

- 1 Siempre
- 2 La mayoría del tiempo
- 3 A veces
- 4 Nunca
- 8 Se rehúsa a contestar

B674. **En los últimos 6 meses, ¿Qué tan seguido te has inyectado alrededor de otras personas que tenían naloxona que te pudieran dar dentro de 5 minutos?** (Escoja una)

- 1 Siempre
- 2 La mayoría del tiempo
- 3 A veces
- 4 Nunca
- 8 Se rehúsa a contestar

B675. **¿Sabe a dónde ir para conseguir Naloxona gratis hoy día?** (Escoja una)

- 1 Si
- 2 No
- 3 No estoy seguro-a
- 8 Se rehúsa a contestar

B676. ***En los últimos 6 meses, has tenido algún absceso (cuerazo) en una ubicación en tu cuerpo donde te inyectas drogas?***

- 1 Si
- 0 No
- 8 Se rehúsa a contestar

B677. **¿Cuál es el tipo de seguridad o plan de salud principal que tiene Ud. ahora?** (Escoja una)

- 0 No tengo seguridad de salud
- 1 Privada (contratada directamente o a través de mi trabajo)
- 2 Pública (Medicare, MediCal, Tricare)
- 7 No sé
- 8 Se rehúsa a contestar

B678. Perdió Ud. su seguridad médica a causa de la pandemia del COVID-19?

- 1 Si
- 0 No
- 7 No sé
- 8 Se rehúsa a contestar

B679. ¿Tiene Ud. una discapacidad que interfiere con su habilidad para realizar tareas cotidianas? Ejemplos de actividades cotidianas incluirían el caminar, subir escaleras, ir de compras, balancear su chequera, bañarse, o vestirse.

- 1 Si
- 0 No
- 8 Se rehúsa a contestar

**EXPERIENCIA DE REHABILITACIÓN DE DROGAS**

**LEA: ENTREVISTADOR:** *Ahora, le voy a preguntar algunas preguntas sobre el conseguir ayuda para su uso de drogas.*

B680. ¿Hasta qué punto diría usted que actualmente necesita ayuda para su uso de drogas? (Escoja una)

- |   |                       |
|---|-----------------------|
| 0 | No necesita ayuda     |
| 1 | Algo de ayuda         |
| 2 | Mucha ayuda           |
| 3 | Ayuda urgente         |
| 8 | Se rehúsa a contestar |

B681. Alguna vez, ¿ha recibido cualquier tipo de ayuda profesional para su uso de alcohol o drogas? Por ayuda me refiero a un centro de rehabilitación, la metadona o el uso de otros medicamentos, o cualquier otro tipo de programa o reunión que le ayuda a reducir o detener su uso de alcohol o drogas.

- |   |                       |
|---|-----------------------|
| 1 | Si                    |
| 0 | No                    |
| 8 | Se rehúsa a contestar |

***If B681 is not equal to 1, then siga con P instrucción antes de B770.***

B682. ¿Para cuál de las siguientes condiciones recibió ayuda profesional? (Escoja una)

- |   |                           |
|---|---------------------------|
| 1 | Drogas solamente          |
| 2 | Alcohol solamente         |
| 3 | Los dos, alcohol y drogas |
| 8 | No sé                     |
| 9 | Se rehúsa a contestar     |

***If B682 is equal to 1 or B682 is equal to 3 then siga con P B683***

***If not, then siga con P instrucción antes de B686.***

B683. En toda su vida, ¿cuántas veces ha recibido algún tipo de ayuda profesional para su uso de drogas?

|       |                       |
|-------|-----------------------|
| __ __ | # de veces            |
| 97    | No sé                 |
| 98    | Se rehúsa a contestar |

B684. De esas [Respuesta a P B683] veces ¿cuántas veces recibió ayuda en los Estados Unidos para su uso de drogas?

|       |                       |
|-------|-----------------------|
| __ __ | # de veces            |
| 98    | Se rehúsa a contestar |

***If B684 is greater than B683 and B684 is not equal to 98 then LEA: "Esa respuesta es mayor que el número total de veces que el participante recibió ayuda profesional por consumo de drogas y alcohol." and siga con P B684.***

B685. De esas [Respuesta a P B683] veces ¿cuántas veces recibió ayuda en México para su uso de drogas?

|       |                       |
|-------|-----------------------|
| __ __ | # de veces            |
| 98    | Se rehúsa a contestar |

***If B685 is greater than B683 and B685 is not equal to 98 then LEA: "Esa respuesta es mayor que el número total de veces que el participante recibió ayuda profesional por consumo de drogas y alcohol." and siga con P B685.***

***If B682 is equal to 2 or B682 is equal to 3 then siga con P B686***

***If not, then siga con P B689.***

B686. En toda su vida, ¿cuántas veces ha recibido algún tipo de ayuda profesional por consumir alcohol?

|       |                       |
|-------|-----------------------|
| __ __ | # de veces            |
| -1    | No sé                 |
| 98    | Se rehúsa a contestar |

B687. De esas [Respuesta a P B686] veces ¿cuántas veces recibió ayuda en los Estados Unidos para su consumo de alcohol?

— — # de veces  
98 Se rehúsa a contestar

***If B687 is greater than B686 and B687 is not equal to 98 then LEA: "Esa respuesta es mayor que el número total de veces que el participante recibió ayuda profesional por consumo de drogas y alcohol." and siga con P B687.***

B688. De esas [Respuesta a P B686] veces ¿cuántas veces recibió ayuda en México para su consumo de alcohol?

— — # de veces  
98 Se rehúsa a contestar

***If B688 is greater than B686 and B688 is not equal to 98 then LEA: "Esa respuesta es mayor que el número total de veces que el participante recibió ayuda profesional por consumo de drogas y alcohol." and siga con P B688.***

B689. ¿Alguna vez se ha inscrito en un centro de rehabilitación? Por centro de rehabilitación, me refiero a un lugar a donde fue y pasó la noche para recibir ayuda por sus problemas con las drogas o alcohol.

1 Si  
0 No  
8 Se rehúsa a contestar

***If B689 is not equal to 1, then siga con P B720.***

B690. ¿Cuántas veces se ha inscrito en un centro de rehabilitación?

— — # de veces  
98 Se rehúsa a contestar

***If B690 is greater than B683 + B686 and B690 is not equal to 98 then LEA: "Esa respuesta es mayor que el número total de veces que el participante recibió ayuda profesional por consumo de drogas y alcohol." and siga con P B690.***

***LEA: LEA: LEA: Ahora me gustaría hacerle preguntas sobre sus experiencias en los centros de rehabilitación en los que ha estado.***



B691. ¿Cuál es el nombre del centro de rehabilitación en el cual se inscribió más recientemente y pasó la noche?

-----

B692. ¿En qué ciudad o ciudades esta ubicado(s) este centro(s) de rehabilitación o tratamiento para drogas? (Escoja una)

- 1 Condado de San Diego
- 2 Tijuana
- 3 Otra ciudad en EUA
- 4 Otra ciudad en México
- 5 Otro
- 8 Se rehúsa a contestar

***If B692 is equal to 5 then siga con P B693***

***If not, then siga con P B694.***

B693. Por favor especifica la ciudad donde esta ubicado este centro de tratamiento para el uso de drogas/ rehabilitación.

-----

B694. ¿Cuándo fue la última vez que entró a este centro de tratamiento para el uso drogas? (Escoja una)

- 1 Hace menos de un mes
- 2 Hace 1-6 meses
- 3 > 6 meses
- 8 Se rehúsa a contestar

***If B694 is equal to 3, then siga con P B720.***

B695. ¿Qué tipo de programa era? (Escoja una)

- 1 Ayuda mutua o programa de 12 pasos
- 2 Fe/Basado en Religión
- 3 Instituto del Gobierno
- 4 Instituto de Hospital Privado
- 5 Clínica de Metadona/ Buprenorfina/Suboxone
- 6 Otro
- 7 No sé
- 8 Se rehúsa a contestar

***If B695 is equal to 6 then siga con P B696***

***If not, then siga con P B697.***

B696. Por favor especifique el tipo de programa.

-----

B697. ¿Había un costo para inscribirse en el centro de tratamiento para el uso de drogas/  
rehabilitación?

- 1 Si
- 0 No
- 8 Se rehúsa a contestar

***If B697 is not equal to 1, then siga con P B703.***

B698. Por favor, seleccione el tipo de moneda que sabe que cuesta el programa de rehabilitación. (Escoja una)

- 1 Pesos
- 2 Dólares
- 8 Se rehúsa a contestar
- 9 No corresponde

***If B698 is equal to 2 then siga con P B699***

***If not, then siga con P instrucción antes de B701.***

B699. ¿Cuál era el costo del programa de rehabilitación en dólares?

- \_\_\_\_\_ dólares
- 99998 Se rehúsa a contestar

B700. Por favor especifique el período de pago (diario, semanal, mensual) del costo del programa de rehabilitación. (Escoja una)

- 1 Por día
- 2 Por semana
- 3 Por mes
- 8 Se rehúsa a contestar

***If B698 is equal to 1 then siga con P B701***

***If not, then siga con P B703.***

B701. ¿Cuál era el costo del programa de rehabilitación en pesos?

- \_\_\_\_\_ pesos
- 99998 Se rehúsa a contestar

B702. Por favor especifique el período de pago (diario, semanal, mensual) del costo del programa de rehabilitación. (Escoja una)

- 1 Por día
- 2 Por semana
- 3 Por mes
- 8 Se rehúsa a contestar

B703. ¿Sigue inscrito en el programa de tratamiento para drogas?

- 1 Si
- 0 No
- 8 Se rehúsa a contestar

B704. A este centro de rehabilitación más reciente ¿para la rehabilitación de qué drogas fue a pedir ayuda? (Marque todas las que apliquen)

- Alcohol
- Marihuana
- Heroína
- Crack
- Cocaína (en polvo)
- Metanfetamina/cristal
- China White
- PCP
- Drogas alucinógenas como ácido, LSD, peyote, mezcalina, hongos
- Inhalantes (por ejemplo, goma, gasolina, diluyente de pintura, agua celeste u otros químicos)
- Tranquilizantes (Rivotril, Diazepam, Valium, Ativan o Restoril)
- OxyContin, Sin receta
- Opioides controlados sin receta (Vicodin, Darvono o Percocet)
- Barbitúricos sin receta (Amytal, Nembutal, o Seconal)
- Fentanilo (Fentanyl)
- Otra droga o combinación de drogas que no se ha mencionado aún
- Se rehúsa a contestar

***If B704P is equal to 1 then siga con P B705***

***If not, then siga con P B706.***

B705. Por favor especifique qué otra droga o combinación de drogas fue a pedir ayuda.

-----

B706. ¿Cuánto tiempo estuvo en el centro de rehabilitación más reciente?

- |       |                               |
|-------|-------------------------------|
| — — — | AÑOS                          |
| — — — | MESES                         |
| — — — | DÍAS                          |
| 997   | No sé (Meses)                 |
| 998   | Se rehúsa a contestar (Meses) |

***If Trunc(B706/12) is greater than A1 then LEA: "La respuesta debe ser menor que la edad del participante. Por favor revise la respuesta." and siga con P B706.***

B707. ¿Fue usted por su propia voluntad al centro de rehabilitación más reciente?

- |   |                       |
|---|-----------------------|
| 1 | Si                    |
| 0 | No                    |
| 8 | Se rehúsa a contestar |

***If B707 is equal to 0 then siga con P B708***

***If not, then siga con P instrucción antes de B709.***

B708. Quien te hizo ir a este más reciente centro de rehabilitacion? (Marque todas las que apliquen)

- Padri
- Pare
- Hijos
- Herr
- Otra
- Juez
- Juez
- Fue
- Trab
- Trab
- Otro
- Se r

***If B708K is not equal to 1, then siga con P instrucción antes de B710.***

B709. Por favor especifique qué otra persona lo hizo ir a este centro de rehabilitación

-----

***If B707 is equal to 1 then siga con P B710***

***If not, then siga con P instrucción antes de B711.***

B710. ¿Cuáles son todas las razones por las que usted decidió inscribirse en el centro de rehabilitación más reciente? (Marque todas las que apliquen)

- Tuve una muy mala malilla
- Estaba cansado (a) de usar drogas/quería hacer algo más con mi vida
- Quería evitar que me arrestaran
- Me dieron de escoger entre ir a tratamiento o ir a la cárcel, elegí ir a tratamiento
- Los agentes del orden me forzaron a ir
- Mi pareja quería que yo fuera (a rehabilitarme)
- Mi pareja también se estaba limpiando/rehabilitando
- Estaba embarazada/tuve un bebé
- Me quitaron a mis hijos (as)
- Mi familia me animó/motivó
- Estaba enfermo(a) y necesitaba atención médica
- Tenía problemas mentales
- Tuve una sobredosis
- Razones religiosas
- Ya no podía pagar las drogas que usaba
- Otra
- Se rehúsa a contestar

***If B710P is not equal to 1, then siga con P B712.***

B711. Por favor especifique qué otra razón (es) tuvo para inscribirse en este centro de rehabilitación más reciente.

-----



B712. ¿Recibió medicamentos para la desintoxicación en este centro de rehabilitación más reciente?

- 1 Si
- 0 No
- 8 Se rehúsa a contestar

***If B712 is equal to 1 then siga con P B713***

***If not, then siga con P B715.***

B713. ¿Qué medicamento(s) recibió en este centro de rehabilitación más reciente? (Marque todas las que apliquen)

- Rivotril
- Darvon
- Metadona
- Buprenorfina/Suboxone
- Naltrexone
- Modafinilo
- Otro
- No sé
- Se rehúsa a contestar

***If B713G is equal to 1 then siga con P B714***

***If not, then siga con P B715.***

B714. Por favor especifique qué otro(s) medicamento(s) recibió.

-----

B715. ¿Cuáles fueron los servicios a los que usted tuvo acceso en este centro de rehabilitación más reciente? **Entrevistador: Lea las opciones y marque todas las que apliquen.** (Marque todas las que apliquen)

- Ayuda mutua o reuniones de 12 pasos
- Asesoría individual psicológica
- Asesoría psicológica familiar
- Asesoría espiritual
- Prueba del VIH
- Prueba de ITS
- Prueba de VHC
- Prueba de COVID-19
- Tratamiento médico de un doctor
- Servicios legales
- Educación de salud
- Ropa y otras cosas personales
- Entrenamiento de trabajo o desarrollo de habilidades
- Otro
- Se rehúsa a contestar

***If B715N is equal to 1 then siga con P B716***

***If not, then siga con P B717.***

B716. Por favor especifique a qué otros servicios tuvo acceso

-----

B717. ¿La última vez que estuvo en el centro de rehabilitación fue maltratado por parte del personal?

- |   |                       |
|---|-----------------------|
| 1 | Si                    |
| 0 | No                    |
| 8 | Se rehúsa a contestar |

*If B717 is equal to 1 then siga con P B718*

*If not, then siga con P instrucción antes de B719.*

B718. ¿Qué tipo de maltrato ha recibido usted por parte del personal? (**Entrevistador: No lea la lista en voz alta. Marque todas las que el participante diga.**) (Marque todas las que apliquen)

- Abuso verbal, ser insultado(a)
- Falta de respeto
- Abuso mental/psicológico
- Abuso físico (golpes, puñetazos, patadas)
- Físicamente restringido (atado a una cama o impedimento del movimiento)
- Impedir que se vaya, no permitirle salirse del centro
- Castigo físico por recaer
- Abuso sexual
- Se han rehusado a darle la medicina para el síndrome de abstinencia (la malilla)
- Ud. tuvo que trabajar fuera del programa o hacer servicio, pero no le pagaron
- Le robaron dinero/propiedad
- No le permitían tener visitas
- No tenía suficiente comida/se sentía enfermo con la comida
- Estaba enfermo, pero no recibió atención médica de un doctor
- Otro
- Se rehúsa a contestar

***If B7180 is equal to 1 then siga con P B719***

***If not, then siga con P B720.***

B719. Por favor especifique qué otro tipo de maltrato recibió Ud

-----

### EXPERIENCIAS DE METADONA

B720. ¿Alguna vez se ha inscrito en un programa de metadona? **Entrevistador: Si el participante dice: "No sé", LEA: La Metadona es una terapia de sustitución oral, lo que significa que el medicamento se le administra por vía oral para ayudar a lidiar con su adicción.)**

- |   |                       |
|---|-----------------------|
| 1 | Si                    |
| 0 | No                    |
| 8 | Se rehúsa a contestar |

*If B720 is equal to 0 then siga con P B721*

*If not, then siga con P instrucción antes de B723.*

B721. ¿Por qué nunca se ha inscrito en un programa de metadona? (Escoja una)

- 01 No funciona
- 02 No quería que mi familia se diera cuenta de que era adicto
- 03 Recaí
- 04 Es muy caro
- 05 Es mucho problema ir a la clínica todos los días
- 06 La clínica estaba muy lejos
- 07 Te da más síntomas abstinencia (malilla)
- 08 La dosis es muy alta
- 09 La dosis es muy baja
- 10 Todavía quiero usar, no le veo propósito
- 11 Es más adictiva
- 12 Nadie me la recomendó
- 13 No sé qué es la metadona
- 14 Otro
- 98 Se rehúsa a contestar

*If B721 is not equal to 14, then siga con P instrucción antes de B723.*

B722. Por favor, especifique otra razon.

-----

*If B720 is not equal to 1, then siga con P B745.*

B723. ¿Cuántas veces ha iniciado un programa de metadona?  
**(ENTREVISTADOR: Si el participante dice, "No se" pregúntele por la respuesta más aproximada)**

---

98 Se rehúsa a contestar

*If B723 is greater than B683 and B723 is not equal to 98 then LEA: "Esa respuesta es mayor que el número total de veces que el participante recibió ayuda profesional por consumo de drogas y alcohol." and siga con P B723.*

B724. ¿Qué edad tenías la primera vez que entraste a un programa de metadona? **(Entrevistador: Si el participante dice: "No sé pídale su mejor cálculo o estimación.)**

|     |                       |
|-----|-----------------------|
| — — | años                  |
| 98  | Se rehúsa a contestar |

*If B724 is greater than A1 and B724 is not equal to 98 then LEA: "La respuesta es mayor que la edad del participante. Por favor verifique la respuesta." and siga con P B724.*

B725. ¿Actualmente se encuentra inscrito en un programa de metadona?

|   |                       |
|---|-----------------------|
| 1 | Si                    |
| 0 | No                    |
| 8 | Se rehúsa a contestar |

B726. ¿Cuándo fue la última vez que entró a este centro de tratamiento para el uso drogas? (Escoja una)

|   |                                                    |
|---|----------------------------------------------------|
| 1 | Dentro de los últimos 6 meses                      |
| 2 | Hace ya más de 6 meses, pero dentro del último año |
| 3 | Hace más de 1 año, pero menos de 3 años            |
| 4 | Hace 3-5 años                                      |
| 5 | Hace más de 5 años                                 |
| 8 | Se rehúsa a contestar                              |

B727. ¿En qué ciudad fue este programa de metadona? (Escoja una)

- 1 Condado de San Diego
- 2 Tijuana
- 3 Otra ciudad en EUA
- 4 Otra ciudad en México
- 5 Otro
- 7 No sé
- 8 Se rehúsa a contestar

*If B727 is equal to 5 then siga con P B728*

*If not, then siga con P B729.*

B728. Por favor especifica la ciudad donde se ubica la clinica de metadona

-----

B729. Alguna vez, ¿se ha inscrito en un programa de tratamiento con metadona por orden de un agente del orden o un juez?

- 1 Si
- 0 No
- 8 Se rehúsa a contestar

*If B729 is not equal to 1, then siga con P B732.*



B730. ¿En qué ciudad fue este programa de metadona? (Marque todas las que apliquen)

- Condado de San Diego
- Tijuana
- Otra ciudad en EUA
- Otra ciudad en México
- Otro
- Se rehúsa a contestar

*If B730E is equal to 1 then siga con P B731*

*If not, then siga con P B732.*

B731. Por favor especifica la ciudad donde se ubica la clinica/el programa de metadona

-----

B732. Por favor, seleccione el tipo de moneda que sabe que cuesta el programa de metadona.  
(Escoja una)

- 1 Pesos
- 2 Dólares
- 8 Se rehúsa a contestar
- 9 No corresponde

*If B732 is equal to 2 then siga con P B733*

*If not, then siga con P instrucción antes de B735.*

B733. ¿Cuál fue el costo del programa de metadona? \_\_\_\_\_ dólares

99998 Se rehúsa a contestar





***If B7400 is equal to 1 then siga con P B741***

***If not, then siga con P B742.***

B741. Por favor especifique la(s) otra razón(es) por las que dejó de usar metadona

-----

B742. ¿Cuánto tiempo duro inscrito en el programa de metadona esta ultima vez?

- \_\_\_ \_\_\_ MESES
- \_\_\_ \_\_\_ SEMANAS
- \_\_\_ \_\_\_ DÍAS
- 998 Se rehúsa a contestar (Meses)

***If Trunc(B742/12) is greater than A1 then LEA: "La respuesta es mayor que la edad del participante. Por favor verifique la respuesta." and siga con P B742.***

***If B723 is greater than 1 and B723 is not equal to 98 then siga con P B743***

***If not, then siga con P B744.***

B743. ¿Cuál es el período más largo que ha estado inscrito en un programa de metadona?

- \_\_\_ \_\_\_ MESES
- \_\_\_ \_\_\_ SEMANAS
- \_\_\_ \_\_\_ DÍAS
- 998 Se rehúsa a contestar (Meses)

***If Trunc(B743/12) is greater than A1 then LEA: "La respuesta es mayor que la edad del participante. Por favor verifique la respuesta." and siga con P B743.***

B744. ¿Qué le pareció la dosis de metadona que le dieron? (Escoja una)

- 1 Era muy alta
- 2 Era muy baja
- 3 Era la cantidad precisa
- 7 No sé
- 8 Se rehúsa a contestar

**EXPERIENCIAS CON BUPRENORFINA**

B745. ¿Alguna vez ha estado inscrito en un programa de Buprenorfina? (**Entrevistador: Si el participante dice: "No sé", LEA: La buprenorfina es una terapia de sustitución oral similar a la metadona, lo que significa que el medicamento se le administra por vía oral para ayudar a lidiar con su adicción.**)

- 1 Si
- 0 No
- 8 Se rehúsa a contestar

*If B745 is equal to 0 then siga con P B746*

*If not, then siga con P instrucción antes de B748.*

B746. ¿Por qué no se ha inscrito en un programa de Buprenorfina/Saboxone? (Escoja una)

- 01 No funciona
- 02 No quería que mi familia se diera cuenta de que era adicto
- 03 Recaí
- 04 Es muy caro
- 05 Es mucho problema ir a la clínica todos los días
- 06 La clínica estaba muy lejos
- 07 Te dá más síntomas de abstinencia (malilla)
- 08 La dosis es muy alta
- 09 La dosis es muy baja
- 10 Todavía quiero usar (drogas), no le veo propósito
- 11 Es más adictiva
- 12 Nadie me la recomendó
- 13 No sé qué es la Buprenorfina/Saboxone
- 14 Otro
- 98 Se rehúsa a contestar

*If B746 is not equal to 14, then siga con P instrucción antes de B748.*

B747. Por favor especifique la(s) otra(s) razón(es) por las que dejó de usar Buprenorfina /Saboxone

-----

*If B745 is not equal to 1, then siga con P instrucción antes de B770.*

B748. ¿Cuántas veces en tu vida has estado en un programa de Buprenorfina/Saboxone?  
**(Entrevistador: Si el participante dice: "No sé pídale su mejor cálculo o estimación.)**

\_\_\_ veces

-01 Se rehúsa a contestar

*If B748 is greater than B683 and B748 is not equal to 98 then LEA: "Esa respuesta es mayor que el número total de veces que el participante recibió ayuda profesional por consumo de drogas y alcohol." and siga con P B748.*

B749. ¿Qué edad tenías la primera vez que usaste Buprenorfina/Saboxone? **(Entrevistador: Si el participante dice: "No sé pídale su mejor cálculo o estimación.)**

- — veces
- 98 Se rehúsa a contestar

*If B749 is greater than A1 and B749 is not equal to 98 then LEA: "Esa respuesta supera la edad actual del participante. Por favor revise la respuesta." and siga con P B749.*

B750. ¿Está inscrito en un programa de Buprenorfina-Suboxona actualmente?

- 1 Si
- 0 No
- 8 Se rehúsa a contestar

B751. ¿Cuándo fue la última vez que se inscribió en un programa de Buprenorfina/Suboxona?  
**Entrevistador: Si el participante dice No Sé, pídale que le dé su mejor estimación**  
 (Escoja una)

- 1 Dentro de los últimos 6 meses
- 2 Hace ya más de 6 meses, pero dentro del último año
- 3 Hace más de 1 año, pero menos de 3 años
- 4 Hace 3-5 años
- 5 Hace más de 5 años
- 7 No sé
- 8 Se rehúsa a contestar



B752. ¿En qué ciudad se ubicaba este programa de Buprenorfina/Saboxone? (Escoja una)

- 1 Condado de San Diego
- 2 Tijuana
- 3 Otra ciudad en EUA
- 4 Otra ciudad en México
- 5 Otro
- 8 Se rehúsa a contestar

*If B752 is equal to 5 then siga con P B753*

*If not, then siga con P B754.*

B753. Por favor especifique en qué otra ciudad se ubicaba el programa de buprenorfina-Suboxona

-----

B754. ¿Alguna vez se ha inscrito en un programa de tratamiento con Buprenorfina/Saboxone por orden de un agente del orden o un juez?

- 1 Si
- 0 No
- 8 Se rehúsa a contestar

*If B754 is not equal to 1, then siga con P B757.*

B755. ¿En qué ciudad se ubicaba este programa de Buprenorfina/Saboxone ordenado de un agente del orden o un juez? (Marque todas las que apliquen)

- Condado de San Diego
- Tijuana
- Otra ciudad en EUA
- Otra ciudad en México
- Otro
- Se rehúsa a contestar

*If B755E is equal to 1 then siga con P B756*

*If not, then siga con P B757.*

B756. Por favor especifique en qué otra ciudad se ubicaba el programa de buprenorfina-Suboxona

-----

B757. Por favor especifique el tipo de moneda en que costaba el programa de Buprenorfina-Suboxona. (Escoja una)

- 1 Pesos Mexicanos
- 2 Dólar americano
- 8 Se rehúsa a contestar
- 9 No corresponde

*If B757 is equal to 2 then siga con P B758*

*If not, then siga con P instrucción antes de B760.*

B758. ¿Cuál fue el costo del programa de Buprenorfina/Suboxona (en dólar americano)?

-----

- 99998 Se rehúsa a contestar

B759. Por favor especifique el período de pago (diario, semanal, mensual) del costo del programa de Buprenorfina/Suboxona (en dólar americano). (Escoja una)

- 1 Por día
- 2 Por semana
- 3 Por mes
- 8 Se rehúsa a contestar

*If B757 is equal to 1 then siga con P B760*

*If not, then siga con P instrucción antes de B762.*

B760. ¿Cuál fue el costo del programa de Buprenorfina/Suboxona (en Pesos Mexicanos)?

\_\_\_\_\_

99998 Se rehúsa a contestar

B761. Por favor especifique el período de pago (diario, semanal, mensual) del costo del programa de Buprenorfina/Suboxona (en Pesos Mexicanos). (Escoja una)

- 1 Por día
- 2 Por semana
- 3 Por mes
- 8 Se rehúsa a contestar

*If B750 is equal to 1 then siga con P B762*

*If not, then siga con P instrucción antes de B763.*

B762. ¿Todavía está usando Buprenorfina?

- 1 Si
- 0 No
- 8 Se rehúsa a contestar

*If B762 is equal to 1 then siga con P B763*

*If not, then siga con P instrucción antes de B765.*



B766. Por favor especifique la otra razón por la que ha dejado su programa de Buprenorfina-Suboxona.

-----

B767. ¿Cuánto tiempo estuvo inscrito en el programa de Buprenorfina/Suboxona la última vez?

- \_\_\_ \_\_\_ MESES
- \_\_\_ \_\_\_ SEMANAS
- \_\_\_ \_\_\_ DÍAS
- 998 Se rehúsa a contestar (Meses)

***If Trunc(B767/12) is greater than A1 then LEA: "Esa respuesta supera la edad actual del participante. Por favor revise la respuesta." and siga con P B767.***

B768. ¿Cuál es el período más largo de tiempo que ha estado inscrito en un programa de Buprenorfina/Suboxone?

- \_\_\_ \_\_\_ MESES
- \_\_\_ \_\_\_ SEMANAS
- \_\_\_ \_\_\_ DÍAS
- 998 Se rehúsa a contestar (Meses)

***If Trunc(B768/12) is greater than A1 then LEA: "Esa respuesta supera la edad actual del participante. Por favor revise la respuesta." and siga con P B768.***

B769. ¿Qué le pareció la dosis de Buprenorfina/Suboxone que le dieron? (Escoja una)

- 1 Era muy alta
- 2 Era muy baja
- 3 Era la cantidad precisa
- 7 No sé
- 8 Se rehúsa a contestar

***If B681 is not equal to 1 then siga con P B770***

***If not, then siga con P instrucción antes de B772.***

B770. Por favor indique todas las razones por qué no se ha inscrito en un programa de Buprenorfina/Saboxone. (Marque todas las que apliquen)

- Por miedo a la malilla
- Costo/Económico
- No tenía quien me cuidara los niños
- Esposo o pareja no quiere que el/la participante vaya o cause problemas en la relación
- No reunió los requisitos para ser ingresado
- No le gustan los centros
- No le gustan los regímenes de tratamiento
- Demasiadas reglas/restricciones de los centros de rehabilitación
- No le gusta sentirse encerrado
- Problemas de trabajo (como el pedir permiso en el trabajo)
- Demasiado lejos para ir/no estaba cerca
- No sabía a dónde tenía que ir
- Tenía temor que lo fueran a maltratar los empleados del centro
- Tenía temor que otros se enteraran que el participante estaba en tratamiento
- No tiene la fuerza de voluntad para dejarla (la droga)
- El uso de drogas no es el problema
- Intenté un programa de rehabilitación antes y no funcionó
- No cree que la rehabilitación funcione
- Puedo reducir o dejar de usar drogas por mi cuenta
- No estoy listo para dejar de usar drogas
- Todavía no he pensado en ir a rehabilitación
- Estoy feliz con mi estilo de vida actual

- \_\_\_ Miedo por su seguridad al acudir al programa
- \_\_\_ Miedo de ser molestado por la policía cuando acuda al programa
- \_\_\_ Se rehúsa a contestar

B771. Tiene alguna otra razón por la que no ha recibido ningún tipo de ayuda o tratamiento para su uso de drogas.

- 1 Si
- 0 No
- 8 Se rehúsa a contestar

*If B771 is equal to 1 then siga con P B772*

*If not, then siga con P instrucción antes de B773.*

B772. Por favor especifique otra(s) razón(es) por la(s) que no ha buscado ayuda o tratamiento para su uso de drogas.

-----

*If B725 is equal to 1, then siga con P instrucción antes de B774.*

B773. ¿Qué tan probable es que Ud. inicie un programa de metadona dentro de los próximos 6 meses?

**ENTREVISTADOR: Si el participante dice que No Sabe, lea lo siguiente: La Metadona es una terapia de reemplazo oral, lo que quiere decir que es una medicina que se toma para lidiar con su adicción. (Escoja una)**

- 1 Muy Improbable
- 2 Poco probable
- 3 Probable
- 4 Muy Probable
- 8 Se rehúsa a contestar

*If B750 is equal to 1, then siga con P instrucción antes de B775.*



B774. ¿Qué tan probable es que Ud. inicie un programa de Buprenorfina/Suboxone dentro de los próximos 6 meses?

**ENTREVISTADOR: Si el participante dice que No Sabe, lea lo siguiente: La Buprenorfina/Suboxone es una terapia de reemplazo oral similar a la metadona, lo que quiere decir que es una medicina que se le dá para lidiar con su adicción.**

(Escoja una)

- 1      Muy Improbable
- 2      Poco probable
- 3      Probable
- 4      Muy Probable
- 8      Se rehúsa a contestar

## ENCUENTROS CON LAS FUERZAS DEL ORDEN

**LEA: ENTREVISTADOR LEA AL PARTICIPANTE:** Las siguientes preguntas se refieren a las leyes vigentes y las experiencias con la justicia criminal. Por favor responda según su mejor conocimiento de las leyes, mas allá de lo que Ud. opine sobre si la policía cumple con estas leyes

*If NDT\_SD is equal to 1 or DT\_SD is equal to 1 then siga con P B775*

*If not, then siga con P instrucción antes de B776.*

B775. En tu opinión actualmente en San Diego ¿es legal traer jeringas nuevas, que no han sido usadas?

- |   |                       |
|---|-----------------------|
| 1 | Si                    |
| 0 | No                    |
| 7 | No sé                 |
| 8 | Se rehúsa a contestar |

*If NDT\_TJ is equal to 1 or DT\_SD is equal to 1 then siga con P B776*

*If not, then siga con P instrucción antes de B777.*

B776. En tu opinión actualmente en Tijuana ¿es legal traer jeringas nuevas, que no han sido usadas?

- |   |                       |
|---|-----------------------|
| 1 | Si                    |
| 0 | No                    |
| 7 | No sé                 |
| 8 | Se rehúsa a contestar |

**LEA: ENTREVISTADOR LEA:** Ahora me gustaría hacerle algunas preguntas acerca de los encuentros que ha tenido con agentes del orden. Cuando digo los agentes del orden, este término incluye todo tipo de policías municipales, estatales o federales, u oficiales del ejército, investigadores o procuradores. Esta sección es sólo acerca de las interacciones con los agentes del orden en México o en los Estados Unidos. Sé que algunas de estas preguntas pueden ser algo incómodas para responder, pero la entrevista es confidencial, y nosotros no daremos ningún tipo de información a nadie fuera de este proyecto. Nada de lo que nos digas puede ser ligado a ti como individuo.

B777. ¿Alguna vez ha sido parado por agentes del orden? Por esto, nos referimos a alguna vez que fue parado por agentes del orden por ejemplo que lo pararon y lo dejaron ir o que lo pararon y arrestaron.

- 1 Si
- 0 No
- 8 Se rehúsa a contestar

***If B777 is not equal to 1, then siga con P B797.***

B778. Durante los últimos 6 meses, ¿ha sido parado por agentes del orden? Por esto, nos referimos a alguna vez que fue parado por agentes del orden por ejemplo que lo pararon y lo dejaron ir o que lo pararon y arrestaron.

- 1 Si
- 0 No
- 8 Se rehúsa a contestar

***If B778 is not equal to 1, then siga con P B797.***

B779. En los últimos 6 meses, ¿en que ciudad estuviste cuando te pararon los agentes del orden? (Marque todas las que apliquen)

- Condado de San Diego
- Tijuana
- Otra ciudad en EUA
- Otra ciudad en México
- Otro
- Se rehúsa a contestar

***If B779E is equal to 1 then siga con P B780***

***If not, then siga con P B781.***

B780. Por favor especifique en qué otra ciudad te pararon los agentes del orden en los últimos 6 meses

-----

B781. Durante los últimos 6 meses, cuando fue parado por agentes del orden, ¿qué fue lo que le sucedió? (Marque todas las que apliquen)

- Lo pararon y lo arrestaron
- Lo pararon y lo dejaron ir
- No sé
- Se rehúsa a contestar

*If B781B is equal to 1 then siga con P instrucción antes de B782*

*If not, then siga con P B790.*

**LEA:** *LEA: Las siguientes preguntas se refieren a las ocasiones que fuiste parado pero NO arrestado por un agente del orden en los últimos 6 meses.*

B782. ¿Cuántas veces ha sido parado (pero no arrestado) por agentes del orden en los últimos 6 meses? **Entrevistador: si el participante tiene dificultad para calcular la respuesta para el período de 6 meses, por favor, ayúdelo mediante una estimación de la frecuencia de eventos (veces por semana o mes); y luego calcule una estimación basada en la frecuencia de los encuentros por mes o por semana (por ejemplo, una vez por semana multiplicado por 26 semanas = 26 veces, o dos veces al mes, multiplicado por 6 meses = 12 veces)]**

\_\_\_ # de veces

998 Se rehúsa a contestar *Siga con P instrucción antes de Q1*

*If B782 is equal to 998 then siga con P instrucción antes de B783*

*If not, then siga con P instrucción antes de B784.*

**LEA:** *ENTREVISTADOR LEA SI EL PARTICIPANTE SE REHUSA A RESPONDER ESTA PREGUNTA: Yo sé que algunas de estas preguntas pueden ser un poco incómodas para ti para responder, pero la entrevista es confidencial, y nosotros no compartiremos ningún tipo de información personal con nadie fuera de este proyecto. Nada de lo que nos digas puede ser ligado a ti como individuo.*

B783. ¿Cuántas veces ha sido parado (pero no arrestado) por agentes del orden en los últimos 6 meses? **Entrevistador: si el participante tiene dificultad para calcular la respuesta para el período de 6 meses, por favor, ayúdelo mediante una estimación de la frecuencia de eventos (veces por semana o mes); y luego calcule una estimación basada en la frecuencia de los encuentros por mes o por semana (por ejemplo, una vez por semana multiplicado por 26 semanas = 26 veces, o dos veces al mes, multiplicado por 6 meses = 12 veces)]**

\_\_\_ # de veces

998 Se rehúsa a contestar *Siga con P instrucción antes de Q1*

*STOPPED = If(B782 is not equal to 998, B782, If(B782 is equal to 998, B783, 0))*

*If B782 is equal to 0 or B783 is equal to 0 or B783 is equal to 998, then siga con P B790.*

B784. ¿En qué ciudad estabas cuando fuiste parado (no arrestado) por agentes del orden en los último 6 meses? (Marque todas las que apliquen)

- \_\_\_ Condado de San Diego
- \_\_\_ Tijuana
- \_\_\_ Otra ciudad en EUA
- \_\_\_ Otra ciudad en México
- \_\_\_ Otro
- \_\_\_ Se rehúsa a contestar

*If B784E is equal to 1 then siga con P B785*

*If not, then siga con P B786.*

B785. Por favor especifique en qué otra ciudad te pararon pero no te arrestaron los agentes del orden en los últimos 6 meses

-----

B786. De las **[STOPPED]** veces que usted fue parado por agentes del orden en los últimos 6 meses, ¿cuántas veces un agente del orden le exigió dinero como una forma de soborno (mordida)?

\_\_\_ veces

998 Se rehúsa a contestar

***If B786 is greater than STOPPED and B786 is not equal to 998 then LEA: "Need translation" and siga con P B786.***

B787. De las **[STOPPED]** veces que usted fue parado por agentes del orden en los últimos 6 meses, ¿cuántas veces un agente del orden le confiscó y nunca le regresó dinero u otras cosas de valor?

— — — veces  
998 Se rehúsa a contestar

***If B787 is greater than STOPPED and B787 is not equal to 998 then LEA: "La respuesta del participante debe ser menor o igual al número de veces que fue detenido por la policía en los últimos 6 meses. Por favor revise las respuestas." and siga con P B787.***

B788. De las **[STOPPED]** veces que usted fue parado por agentes del orden en los últimos 6 meses, ¿cuántas veces un agente del orden le confiscó sus jeringas limpias, sin arrestarlo?

— — — veces  
998 Se rehúsa a contestar

***If B788 is greater than STOPPED and B788 is not equal to 998 then LEA: "La respuesta del participante debe ser menor o igual al número de veces que fue detenido por la policía en los últimos 6 meses. Por favor revise las respuestas." and siga con P B788.***

B789. De las **[STOPPED]** veces que usted fue parado por agentes del orden en los últimos 6 meses, ¿cuántas veces un agente del orden le confiscó sus jeringas usadas sin arrestarlo?

— — — veces  
998 Se rehúsa a contestar

***If B789 is greater than STOPPED and B789 is not equal to 998 then LEA: "La respuesta del participante debe ser menor o igual al número de veces que fue detenido por la policía en los últimos 6 meses. Por favor revise las respuestas." and siga con P B789.***

B790. ¿Alguna vez has sido arrestado/a por agentes del orden? **Por arresto me refiero a experiencias cuando la policía te ha llevado a la estación de policía y hubo un reporte formal hecho sobre este evento.**

1 Si  
0 No  
8 Se rehúsa a contestar

*If B790 is not equal to 1, then siga con P B797.*

B791. ¿En qué ciudad fuiste arrestado/a por agentes del orden? (Marque todas las que apliquen)

- Condado de San Diego
- Tijuana
- Otra ciudad en EUA
- Otra ciudad en México
- Otro
- Se rehúsa a contestar

*If B791E is equal to 1 then siga con P B792*

*If not, then siga con P instrucción antes de B793.*

B792. Por favor especifique en qué otra ciudad te arrestaron los agentes del orden.

-----

**LEA: ENTREVISTADOR LEA AL PARTICIPANTE: Ahora le voy a preguntar específicamente sobre las experiencias de arrestos que haya tenido.**

B793. ¿Cuántas veces ha sido arrestado por agentes del orden en los últimos 6 meses?  
**[Entrevistador: si el participante tiene dificultad para calcular la respuesta para el período de 6 meses, por favor, ayúdelo mediante una estimación de la frecuencia de eventos (veces por semana o mes), y luego calcule una estimación basada en la frecuencia de los encuentros por mes o por semana (por ejemplo, una vez por semana multiplicado por 26 semanas = 26 veces, o dos veces al mes, multiplicado por 6 meses = 12 veces)]**

\_\_\_ \_\_\_ \_\_\_ Veces

998 Se rehúsa a contestar *Siga con P instrucción antes de Q1*

*If B793 is equal to 0 or B793 is equal to 998, then siga con P B797.*

B794. ¿En qué ciudad estabas cuando fuiste arrestado por agentes del orden en los últimos 6 meses? (Marque todas las que apliquen)

- Condado de San Diego
- Tijuana
- Otra ciudad en EUA
- Otra ciudad en México
- Otro
- Se rehúsa a contestar

*If B794E is equal to 1 then siga con P B795*

*If not, then siga con P B796.*

B795. Por favor especifique en qué otra ciudad te arrestaron los agentes del orden en los últimos 6 meses

-----

B796. De las [Respuesta a P B793] veces que fuiste arrestado en los últimos 6 meses, ¿cuántas veces te sentenciaron a tiempo en la cárcel?

- Veces
- 997 No sé
- 998 Se rehúsa a contestar

*If B796 is greater than B793 and B796 is not equal to 997 and B796 is not equal to 998 then LEA: "La respuesta del participante debe ser menor o igual al número de veces que fue arrestado en los últimos 6 meses. Por favor revise las respuestas." and siga con P B796.*

B797. En los últimos 6 meses ¿cuántas veces ha sido físicamente golpeado (golpe, puñetazo, patada) por quién sea?

- # de veces
- 998 Se rehúsa a contestar

*If B797 is equal to 0 or B797 is equal to 998, then siga con P instrucción antes de B802.*



B798. De las [Respuesta a P B797] veces en los últimos 6 meses que fue golpeado, ¿cuántas veces fue golpeado por agentes del orden?

\_\_\_ \_\_\_ \_\_\_ # de veces  
998 Se rehúsa a contestar

*If B798 is greater than B797 and B798 is not equal to 998 then LEA: "La respuesta del participante debe ser menor o igual al número de veces que alguien lo golpeó físicamente (golpeó, golpeó o pateó) en los últimos 6 meses. Por favor revise las respuestas." and siga con P B798.*

*If B798 is greater than 0 and B798 is not equal to 998 then siga con P B799*

*If not, then siga con P B801.*

B799. ¿En qué ciudad lo golpearon físicamente (golpe, puñetazo, patada) los agentes del orden? (Marque todas las que apliquen)

- \_\_\_ Condado de San Diego
- \_\_\_ Tijuana
- \_\_\_ Otra ciudad en EUA
- \_\_\_ Otra ciudad en México
- \_\_\_ Otro
- \_\_\_ Se rehúsa a contestar

*If B799E is equal to 1 then siga con P B800*

*If not, then siga con P B801.*

B800. Por favor especifique en qué otra ciudad lo golpearon físicamente los agentes del orden en los últimos 6 meses

-----

B801. De las [Respuesta a P B797] veces en los últimos 6 meses en que fue golpeado, ¿cuántas veces fue golpeado por su pareja íntima?

\_\_\_ \_\_\_ \_\_\_ # de veces  
998 Se rehúsa a contestar

***If B801 is greater than B797 and B801 is not equal to 998 then LEA: "La respuesta del participante debe ser menor o igual al número de veces que fue golpeado en los últimos 6 meses. Por favor revise las respuestas." and siga con P B801.***

**SECCIÓN D: ACTITUDES**

**LEA:** *LEA: El siguiente grupo de preguntas le pedirá su opinión sobre una serie de escenarios diferentes. Me gustaría saber qué tan probable cree que es que estas cosas le puedan pasar en el futuro.*

B802. ¿Qué tan probable piensa que sea que usted pueda ser arrestado en [LCOUNTRY] por posesión de drogas si lo/a para la policía cuando lleva drogas? (Escoja una)

- 1 Muy improbable
- 2 Un poco improbable
- 3 Un poco probable
- 4 Muy probable
- 8 Se rehúsa a contestar

B803. ¿Qué tan probable piensa que es que usted pueda ser arrestado en [LCOUNTRY] por posesión de parafernalia si lo/a para la policía cuando lleva jeringas nuevas, sin usar? (Escoja una)

- 1 Muy improbable
- 2 Un poco improbable
- 3 Un poco probable
- 4 Muy probable
- 8 Se rehúsa a contestar

B804. ¿Qué tan probable piensa que es que usted pueda ser arrestado en [LCOUNTRY] por posesión de parafernalia si lo/a para la policía cuando lleva jeringas usadas? (Escoja una)

- 1 Muy improbable
- 2 Un poco improbable
- 3 Un poco probable
- 4 Muy probable
- 8 Se rehúsa a contestar

B805. ¿Qué tan probable piensa que es que la policía le exija un soborno (mordida) en [LCOUNTRY] si lo/la para cuando lleva jeringas nuevas que no han sido usadas? (Escoja una)

- 1 Muy improbable
- 2 Un poco improbable
- 3 Un poco probable
- 4 Muy probable
- 8 Se rehúsa a contestar

B806. ¿Qué tan probable piensa que es que la policía le exija un soborno (mordida) en [LCOUNTRY] si lo/la para cuando lleva jeringas usadas? (Escoja una)

- 1 Muy improbable
- 2 Un poco improbable
- 3 Un poco probable
- 4 Muy probable
- 8 Se rehúsa a contestar

B807. ¿Qué tan probable piensa que es que sea arrestado en [LCOUNTRY] sólo porque parece un consumidor de drogas? (Escoja una)

- 1 Muy improbable
- 2 Un poco improbable
- 3 Un poco probable
- 4 Muy probable
- 8 Se rehúsa a contestar

### Experiencias De Encarcelamiento

**LEA: LEER: Ahora te voy a preguntar algunas preguntas sobre tus experiencias con prisiones y cárceles. Para las siguientes preguntas, prisiones se refieren a instituciones a nivel federal y cárceles se refiere a instituciones estatales o del condado (no a nivel municipal) donde te detienen con o sin ser sentenciado (en México Centros de Readaptación Social Penitenciaria La Mesa o El Hongo y en EUA The Federal Bureau of Prisons clasifica las prisiones en varias categorías: Penitenciaria de EUA, Instituciones correccionales federales, instituciones correccionales privadas, campamentos de prisión federal, instalaciones administrativa, complejos de correccionales federales.)**

- B808. ¿Has estado alguna vez en tu vida en la cárcel/prisión?
- |  |   |                       |
|--|---|-----------------------|
|  | 1 | Si                    |
|  | 0 | No                    |
|  | 8 | Se rehúsa a contestar |

***If B808 is not equal to 1, then siga con P B812.***

- B809. Desde que empezaste a usar drogas, ¿cuántas veces estuviste en la cárcel/prisión?
- |  |       |                       |
|--|-------|-----------------------|
|  | _ _ _ | veces                 |
|  | 998   | Se rehúsa a contestar |

***If B809 is equal to 0 or B809 is equal to 998, then siga con P B811.***

- B810. Desde que tú empezaste a inyectarte, ¿cuál es el total del tiempo que has pasado en la cárcel/prisión?
- |  |     |                              |
|--|-----|------------------------------|
|  | _ _ | AÑOS                         |
|  | _ _ | MESES                        |
|  | _ _ | DÍAS                         |
|  | 98  | Se rehúsa a contestar (Años) |
|  | 99  | No corresponde (Años)        |

- B811. ¿Estuvo usted encarcelado o en prisión la primera vez que usted se inyectó drogas?
- |  |   |                       |
|--|---|-----------------------|
|  | 1 | Si                    |
|  | 0 | No                    |
|  | 8 | Se rehúsa a contestar |

- B812. ¿Alguna vez en su vida estuvo en la cárcel?
- |   |                       |
|---|-----------------------|
| 1 | Si                    |
| 0 | No                    |
| 8 | Se rehúsa a contestar |

***If B812 is not equal to 1, then siga con P instrucción antes de B816.***

- B813. De que empezaste a inyectarte drogas, ¿Cuántas veces has estado en la cárcel?
- |       |                       |
|-------|-----------------------|
| — — — | veces                 |
| 998   | Se rehúsa a contestar |

***If B813 is equal to 0 or B813 is equal to 998, then siga con P B815.***

- B814. De que empezaste a inyectarte drogas, ¿Cuál es el tiempo total que has pasado en la cárcel
- |     |                              |
|-----|------------------------------|
| — — | AÑOS                         |
| — — | MESES                        |
| — — | DÍAS                         |
| 98  | Se rehúsa a contestar (Años) |
| 99  | No corresponde (Años)        |

- B815. ¿Estuvo usted en la cárcel la primera vez que usted se inyectó drogas?
- |   |                       |
|---|-----------------------|
| 1 | Si                    |
| 0 | No                    |
| 8 | Se rehúsa a contestar |

***If B811 is equal to 1 and B815 is equal to 1 then LEA: "El participante indicó que la primera vez que el participante inyectado fue en prisión. Ahora el participante indicó que la primera vez estuvo en la cárcel. Por favor, revise en consecuencia." and siga con P B815.***

***If B808 is not equal to 1 and B812 is not equal to 1, then siga con P instrucción antes de B837.***

***LEA: ENTREVISTADOR LEA: Ahora te voy a preguntar sobre tu experiencia en prisión en los últimos 6 meses.***

B816. En los últimos 6 MESES, ¿cuántas veces ha estado en prisión/cárcel?

\_\_\_ \_\_\_ \_\_\_ veces

998 Se rehúsa a contestar

*If B816 is equal to 0 or B816 is equal to 998, then siga con P instrucción antes de B837.*

B817. ¿En qué ciudad estuviste en la cárcel en los últimos 6 meses? (Marque todas las que apliquen)

\_\_\_ Condado de San Diego

\_\_\_ Tijuana

\_\_\_ Otra ciudad en EUA

\_\_\_ Otra ciudad en México

\_\_\_ Otro

\_\_\_ Se rehúsa a contestar

*If B817E is equal to 1 then siga con P B818*

*If not, then siga con P B819.*

B818. Por favor especifique en qué otra ciudad estaba ubicada esta cárcel

-----

B819. En los últimos 6 meses, ¿cuánto tiempo en total ha estado en la cárcel/prisión

\_\_\_ \_\_\_ AÑOS

\_\_\_ \_\_\_ MESES

\_\_\_ \_\_\_ DÍAS

98 Se rehúsa a contestar (Años)

**LEA:** *LEA: Ahora le voy a preguntar sobre su uso de drogas la última vez que estuvo en prisión/cárcel, en los últimos 6 meses.*

B820. ¿En que ciudad estaba la cárcel/prisión en la que estuviste la última vez? (Escoja una)

- 1 Condado de San Diego
- 2 Tijuana
- 3 Otra ciudad en EUA
- 4 Otra ciudad en México
- 5 Otro
- 8 Se rehúsa a contestar

***If B820 is equal to 5 then siga con P B821***

***If not, then siga con P B822.***

B821. Por favor especifique en qué otra ciudad estaba ubicada esta cárcel más reciente

-----

B822. ¿Cuál es el nombre de la prisión/cárcel en donde estuvo recluso? (Escoja una)

- 1 Mínima seguridad de Otay Mesa
- 2 Las Colinas
- 3 Donovan
- 4 La Mesa
- 5 El Hongo
- 6 Otra
- 7 No sé
- 8 Se rehúsa a contestar

***If B822 is equal to 6 then siga con P B823***

***If not, then siga con P B824.***





B827. ¿Qué drogas usaste mientras estabas en la cárcel/prisión? (Marque todas las que apliquen)

- Alcohol
- Marijuana
- Heroína sola
- Cocaína crack sola
- Cocaína en polvo sola
- Heroína y cocaína juntas (speedball)
- Metanfetamina/cristal sola
- Metanfetamina/cristal y heroína juntas
- China white sola
- China white y heroína juntas
- PCP
- China white y cristal/metanfetamina juntas
- Drogas alucinógenas como ácido, LSD, peyote, mezcalina
- Inhalantes (pegamento, gasolina, tinner de pintura)
- Tranquilizantes sin receta (Rivotril, diazepam, ativan)
- Oxycontin sin receta
- Otros opioides controlados sin receta (vicodin, darvon, percocet)
- Barbitúricos sin receta (amytal, nembutal, seconal)
- Fentanyl solo
- Fentanyl y cocaína juntos
- Fentanyl y heroína juntos
- Fentanyl y metanfetamina/cristal juntos
- Fentanyl y China White juntos

\_\_\_ Otra droga o combinación de drogas que no se mencionó antes

\_\_\_ Se rehúsa a contestar

**If B827X is not equal to 1, then siga con P B829.**

B828. Por favor especifique que droga(s) uso mientras estuvo en prisión/cárcel.

-----

- B829. ¿Te inyectaste drogas mientras estuviste en la cárcel/prisión? 1 Si
- 0 No
- 8 Se rehúsa a contestar

**If B829 is not equal to 1, then siga con P instrucción antes de B836.**

B830. ¿Utilizó alguna jeringa nueva mientras estuvo en prisión / cárcel?

- 1 Si
- 0 No
- 8 Se rehúsa a contestar

**If B830 is equal to 1 then siga con P B831**

**If not, then siga con P B832.**

B831. En promedio, ¿cuántas jeringas nuevas utilizó en un mes en la prisión / cárcel?

- \_\_\_ \_\_\_ \_\_\_ jeringas
- 998 Se rehúsa a contestar

B832. ¿Utilizó jeringas usadas o jeringas viejas mientras estuvo en la prisión/cárcel?

- 1 Si
- 0 No
- 8 Se rehúsa a contestar

**If B832 is equal to 1 then siga con P B833**

***If not, then siga con P instrucción antes de B836.***

B833. Cuando se inyectó drogas en prisión/cárcel, ¿qué tan seguido utilizó una jeringa que usted sabía o sospechaba que había sido usada antes por otra persona? (Escoja una)

- 1 Nunca
- 2 A veces
- 3 Como la mitad de las veces
- 4 A menudo
- 5 Siempre
- 8 Se rehúsa a contestar

B834. De las veces que se inyectó con otras personas en prisión/cárcel, ¿qué tan seguido ha dividido drogas con alguien más usando una jeringa? Esto también es conocido como backloading, piggybacking o dividir drogas mojadas. (Escoja una)

- 1 Nunca
- 2 Menos de la mitad de las veces
- 3 Como la mitad de las veces
- 4 Más de la mitad de las veces
- 5 Siempre
- 8 Se rehúsa a contestar

***If B833 is not equal to 1 and B833 is not equal to 8 then siga con P B835***

***If not, then siga con P instrucción antes de B836.***

B835. De las veces que se inyectó con una jeringa usada por alguien más en la prisión/cárcel, ¿qué tan seguido la limpió con cloro antes de usarla? (Escoja una)

- |   |                                |
|---|--------------------------------|
| 1 | Nunca                          |
| 2 | Menos de la mitad de las veces |
| 3 | Como la mitad de las veces     |
| 4 | Más de la mitad de las veces   |
| 5 | Siempre                        |
| 8 | Se rehúsa a contestar          |

*If B825 is equal to 1, then siga con P instrucción antes de B837.*

B836. *Cuando saliste te prisión/cárcel, ¿recibiste cualquiera de las siguientes...* (Marque todas las que apliquen)

- Metadona, suboxona o buprenorfina (Terapia de Antagonista de Opioides)
- Referencia a un programa de metadona, suboxona o burprenorfina
- Referencia a otros tratamientos de drogas o servicios
- Naloxona/Narcan
- Referencia a un intercambio de jeringa
- Se rehúsa a contestar

**LEA:** *LEA: Ahora le voy a hacer algunas preguntas acerca de sus experiencias en centros de detención en donde estuvo en custodia). Para el propósito de estas preguntas, se considera un centro de detención como un lugar en donde puede estar detenido hasta 72 horas (por ejemplo, Fuerzas especiales, La 20 o Cárcel Municipal o Centro Municipal de Infractores, Separos de la Judicial).*

**LEA:** *LEA: Te voy a preguntar primero sobre tus experiencias en centros de detención a lo largo de tu vida y en los últimos 6 meses.*

B837. ¿Alguna vez has estado en un centro de detención (no la cárcel)?

- 1 Si
- 0 No
- 8 Se rehúsa a contestar

*If B837 is not equal to 1, then siga con P instrucción antes de B842.*

**LEA:** LEA: *Ahora le voy a hacer algunas preguntas acerca de sus experiencias en centros de detención en los últimos 6 meses. Para el propósito de estas preguntas, se considera un centro de detención como un lugar en donde puede estar detenido hasta 72 horas.*

B838. En los últimos seis meses, ¿cuántas veces ha estado en un centro de detención?

- — — veces
- 998 Se rehúsa a contestar

*If B838 is equal to 0 or B838 is equal to 998, then siga con P instrucción antes de B842.*

B839. En los últimos 6 meses, ¿Cuantos días estuvo usted en un centro de detención en los últimos 6 meses?

- — veces
- 98 Se rehúsa a contestar

*If B839 is less than 2, then siga con P instrucción antes de B842.*

B840. En los últimos 6 meses, ¿En dónde se ubica este centro de detención (Marque todas las que apliquen)

- Condado de San Diego
- Tijuana
- Otra ciudad en EUA
- Otra ciudad en México
- Otro
- Se rehúsa a contestar

***If B840E is not equal to 1, then siga con P instrucción antes de B842.***

B841. Por favor especifique en dónde se ubicaba estaba ubicada este centro de detención

-----

***If B816 is greater than 0 and B816 is not equal to 998 or B839 is greater than 0 and B839 is not equal to 998 then siga con P B842***

***If not, then siga con P instrucción antes de B843.***

B842. ¿Saliste de prisión, cárcel, o un centro de detención en los últimos 30 días?

- 1 Si
- 0 No
- 8 Se rehúsa a contestar

**TRATAMIENTO Y PRUEBA DE HEPATITIS C (VHC)**

**LEA:** *LEA: Las siguientes preguntas son sobre Hepatitis C.*

|       |                                                       |   |                       |
|-------|-------------------------------------------------------|---|-----------------------|
| B843. | ¿Alguna vez le han hecho la prueba de la Hepatitis C? | 1 | Si                    |
|       |                                                       | 0 | No                    |
|       |                                                       | 7 | No sé                 |
|       |                                                       | 8 | Se rehúsa a contestar |

*If B843 is equal to 1 then siga con P B844*

*If not, then siga con P instrucción antes de B845.*

B844. ¿Cuándo se hizo la prueba para Hepatitis C? [ENTREVISTADOR: SI PARTICIPANTE NO RESPONDE INMEDIATAMENTE, PREGUNTAR HASTA LLEGAR A UNA FECHA APROXIMADA]

|                   |                             |
|-------------------|-----------------------------|
| ___ / ___ / _____ | dd / mm / aaaa              |
| 2097              | No sé (Año)                 |
| 2098              | Se rehúsa a contestar (Año) |
| 2099              | No corresponde (Año)        |

*If B843 is equal to 0 then siga con P B845*

*If not, then siga con P instrucción antes de B848.*

B845. ¿ Comparado con otros usuarios de droga en esta ciudad que tan probable cree usted que se pueda contagiar con Hepatitis C (VHC)? (Escoja una)

|   |                       |
|---|-----------------------|
| 1 | Mucho más probable    |
| 2 | Muy probable          |
| 3 | Igual                 |
| 4 | Muy improbable        |
| 5 | Mucho más improbable  |
| 8 | Se rehúsa a contestar |



B846. ¿Por qué nunca te has hecho una prueba VHC? (Marque todas las que apliquen)

- Nunca he escuchado de Hep C
- No sabía que había una prueba
- No quiera pagar el costo de le prueba
- Yo nunca, o casi nunca, voy a las clínicas u hospitales
- No quiero saber si tengo VHC
- No me importa si tengo VHC
- No sé a dónde ir para obtener prueba de VHC
- Otro
- No sé
- Se rehúsa a contestar

***If B846H is not equal to 1, then siga con P instrucción antes de B848.***

B847. Por favor especifica porque nunca has tenido una prueba de VHC:

-----

***If B843 is equal to 1 then siga con P B848***

***If not, then siga con P B859.***

B848. ¿Dónde le hicieron la prueba de VHC fuera de este estudio? (Escoja una)

- |   |                                           |
|---|-------------------------------------------|
| 0 | Como parte de un estudio de investigación |
| 1 | Centro de rehabilitación de drogas        |
| 2 | Clínica privada/oficina del doctor        |
| 3 | Clínica pública/Hospital                  |
| 4 | Otro lugar                                |
| 7 | No sé                                     |
| 8 | Se rehúsa a contestar                     |

*If B848 is equal to 0 then siga con P B849*

*If not, then siga con P instrucción antes de B850.*

B849. Por favor especifica en qué estudio:

-----

*If B848 is equal to 4 then siga con P B850*

*If not, then siga con P B851.*

B850. Por favor especifica la ubicación:

-----

B851. ¿Cuál fue su último resultado de la Prueba de VHC? (Escoja una)

- |   |                           |
|---|---------------------------|
| 0 | Negativo                  |
| 1 | Positivo                  |
| 2 | Nunca obtuvo el resultado |
| 7 | No sé                     |
| 8 | Se rehúsa a contestar     |

*If B851 is not equal to 0 then siga con P B852*

***If not, then siga con P B859.***

B852. ¿Un doctor o un trabajador de salud le dijo que usted tiene Hepatitis C?

- |   |                       |
|---|-----------------------|
| 1 | Si                    |
| 0 | No                    |
| 7 | No sé                 |
| 8 | Se rehúsa a contestar |

***If B852 is equal to 1 then siga con P B853***

***If not, then siga con P B859.***

B853. ¿Cuándo fue la primera vez que dió positivo en una prueba de Hepatitis C?

- |           |                             |
|-----------|-----------------------------|
| ___ / ___ | mm / aaaa                   |
| 2097      | No sé (Año)                 |
| 2098      | Se rehúsa a contestar (Año) |

B854. ¿Un doctor enfermera(o) o trabajador de salud le ofreció tratamiento para el Hepatitis C?

- |   |                       |
|---|-----------------------|
| 1 | Si                    |
| 0 | No                    |
| 7 | No sé                 |
| 8 | Se rehúsa a contestar |

***If B854 is not equal to 1, then siga con P B859.***

B855. ¿Alguna vez en su vida Usted tomó medicamentos recetados por un doctor para prevenir que se enferme por la Hepatitis C?

- |   |                       |
|---|-----------------------|
| 1 | Si                    |
| 0 | No                    |
| 7 | No sé                 |
| 8 | Se rehúsa a contestar |

***If B855 is not equal to 1, then siga con P B859.***

|                                   |   |                       |
|-----------------------------------|---|-----------------------|
| B856. ¿Terminaste tu tratamiento? | 1 | Si                    |
|                                   | 0 | No                    |
|                                   | 7 | No sé                 |
|                                   | 8 | Se rehúsa a contestar |

***If B856 is not equal to 0, then siga con P B859.***

B857. ¿Porqué no se está tomando sus medicamentos? (Marque todas las que apliquen)

- Me siento bien/ saludable
- Tengo otras condiciones médicas
- No tengo seguro de salud
- No tengo dinero
- Estoy consumiendo drogas/tomando alcohol
- Perdí mi cita
- Mi doctor me recetó pastillas pero me negué tomarlas
- Mi doctor me dijo que no necesito medicamento
- Dejé de ir a mi médico/nunca regresé
- No tengo doctor
- No quería tomar el medicamento disponible
- No quería que me pusieran inyecciones
- Otro
- No sé
- Se rehúsa a contestar

***If B857M is equal to 1 then siga con P B858***

***If not, then siga con P B859.***

B858. Por favor, especifique la razón por la que no está tomando el medicamento.

-----

B859. Ahora hay tratamientos disponibles que son una pastilla al día por 8-12 semana las cuales pueden curar >90% del VHC de las personas con pocos o sin efectos secundarios. ¿Estarías dispuesto/a ser tratado/a?

- 1 Si
- 0 No
- 7 No sé
- 8 Se rehúsa a contestar

*If B859 is equal to 0 then siga con P B860*

*If not, then siga con P instrucción antes de B861.*

B860. ¿Me puedes decir por qué no estarías dispuesto/a a ser tratado/a para VHC?

-----

**VIH/SIDA**

**LEA: ENTREVISTADOR LEA EN VOZ ALTA: Vamos muy bien. Ahora vamos a hablar sobre VIH/SIDA. Le haré algunas preguntas generales y luego algunas preguntas sobre su experiencia con pruebas y tratamientos para VIH.**

B861. Comparado con otros usuarios de drogas en esta ciudad, ¿qué tan probable cree Ud. que se pueda contagiar con VIH/SIDA? (Escoja una)

- |   |                                                |
|---|------------------------------------------------|
| 1 | Muy Probable                                   |
| 2 | Un poco más probable                           |
| 3 | Igual                                          |
| 4 | Menos Probable                                 |
| 5 | Mucho menos probable                           |
| 6 | No aplicable (por ejemplo: ya es VIH-positiva) |
| 8 | Se rehúsa a contestar                          |

***If B861 is equal to 6, then siga con P B865.***

B862. ¿Alguna vez en la vida le han hecho la prueba de VIH antes de hoy?

- |   |                       |
|---|-----------------------|
| 1 | Si                    |
| 0 | No                    |
| 7 | No sé                 |
| 8 | Se rehúsa a contestar |

***If B862 is equal to 0 then siga con P B863***

***If not, then siga con P instrucción antes de B865.***

B863. ¿Por qué nunca te has hecho una prueba VIH/SIDA? (Marque todas las que apliquen)

- No quiero pagar el costo de la prueba
- Yo nunca, o casi nunca, voy a las clínicas u hospitales
- No quiero saber si tengo VIH
- No me importa si tengo VIH
- No sé a dónde ir para obtener prueba de VIH
- Otro
- No sé
- Se rehúsa a contestar

***If B863F is not equal to 1, then siga con P instrucción antes de B865.***

B864. Por favor especifica por qué nunca te has hecho una prueba de VIH:

-----

***If B862 is equal to 1 then siga con P B865***

***If not, then siga con P instrucción antes de B870.***

B865. ¿Dónde le hicieron la prueba de VIH la última vez? (Escoja una)

- 0 Como parte de un estudio de investigación
- 1 Centro de rehabilitación de drogas
- 2 Clínica privada/oficina del doctor
- 3 Clínica pública/Hospital
- 4 Otro lugar
- 7 No sé
- 8 Se rehúsa a contestar

***If B865 is equal to 0 then siga con P B866***

*If not, then siga con P instrucción antes de B867.*

B866. Por favor especifica el nombre del estudio:

-----

*If B865 is equal to 4 then siga con P B867*

*If not, then siga con P B868.*

B867. Por favor especifica la ubicación:

-----

B868. ¿Cuándo fue la última vez que le hicieron una prueba de VIH/SIDA?

**[ENTREVISTADOR: PON UNA FECHA APROXIMADA SI EL PARTICIPANTE NO  
RECUERDA EXACTAMENTE CUANDO FUE]**

\_\_\_ / \_\_\_

mm / aaaa

2097

No sé (Año)

2098

Se rehúsa a contestar (Año)

B869. ¿Cuál fue su ultimo resultado de la Prueba de VIH/SIDA? (Escoja una)

0

Negativo

1

Positivo

2

Nunca obtuve el resultado

7

No sé

8

Se rehúsa a contestar

*If B869 is equal to 1 then siga con P B870*

*If not, then siga con P instrucción antes de B871.*



B870. ¿Cuándo fue la primera vez que dió positivo en una prueba de VIH/SIDA?  
**[ENTREVISTADOR: PON UNA FECHA APROXIMADA SI EL PARTICIPANTE NO  
 RECUERDA EXACTAMENTE CUANDO FUE]**

|                     |                             |
|---------------------|-----------------------------|
| __ __ / __ __ __ __ | mm / aaaa                   |
| 2097                | No sé (Año)                 |
| 2098                | Se rehúsa a contestar (Año) |

*If B869 is equal to 1 or B869 is equal to 2 then siga con P B871*

*If not, then siga con P B878.*

B871. ¿Un doctor o un trabajador de salud le dijo que usted tiene VIH/SIDA?

|   |                       |
|---|-----------------------|
| 1 | Si                    |
| 0 | No                    |
| 7 | No sé                 |
| 8 | Se rehúsa a contestar |

*If B871 is not equal to 1, then siga con P B878.*

B872. ¿Un doctor enfermera(o) o trabajador de salud le ofreció tratamiento para el VIH/SIDA?

|   |                       |
|---|-----------------------|
| 1 | Si                    |
| 0 | No                    |
| 7 | No sé                 |
| 8 | Se rehúsa a contestar |

*If B872 is not equal to 1, then siga con P B878.*

B873. Alguna vez en la vida, ¿algún doctor o enfermera le dió algún tratamiento o medicina para evitar que se enfermara de VIH/SIDA?

- 1 Si
- 0 No
- 7 No sé
- 8 Se rehúsa a contestar

*If B873 is not equal to 1, then siga con P B878.*

B874. ¿Todavía sigue tomando estos medicamentos?

- 1 Si
- 0 No
- 7 No sé
- 8 Se rehúsa a contestar

*If B874 is not equal to 0, then siga con P B878.*

B875. ¿Por cuánto tiempo tomaste estos medicamentos?

- — — AÑOS
- — — MESES
- — — DÍAS
- 997 No sé (Meses)
- 998 Se rehúsa a contestar (Meses)

B876. ¿Porqué no se esta tomando estos medicamentos? (Marque todas las que apliquen)

- Me siento bien/ saludable
- Tengo otras condiciones médicas
- No tengo seguro de salud
- No tengo dinero
- Estoy consumiendo drogas / tomando alcohol
- Perdí mi cita
- Mi doctor me recetó pastillas pero me negué tomarlas
- Mi doctor me dijo que no necesito medicamento
- Dejé de ir a mi médico/nunca regresé
- No tengo doctor
- No quería tomar el medicamento disponible
- Las medicinas me hacían sentir enfermo
- No quería que mi familia/otros supieran que estaba enfermo
- No podía conseguir mis medicinas ya que me andaba mudando a menudo
- Otro
- No sé
- Se rehúsa a contestar

***If B8760 is equal to 1 then siga con P B877***

***If not, then siga con P B878.***

B877. Por favor, especifique la razón por la que no está tomando el medicamento.

-----

|                                                          |   |                       |
|----------------------------------------------------------|---|-----------------------|
| B878. ¿Ha conocido personalmente a alguien con VIH/SIDA? | 1 | Si                    |
|                                                          | 0 | No                    |
|                                                          | 7 | No sé                 |
|                                                          | 8 | Se rehúsa a contestar |

*If B878 is equal to 1 then siga con P B879*

*If not, then siga con P instrucción antes de B881.*

|                            |       |                       |
|----------------------------|-------|-----------------------|
| B879. ¿A cuántas personas? | — — — | personas              |
|                            | 997   | No sé                 |
|                            | 998   | Se rehúsa a contestar |

|                                                                                  |       |                       |
|----------------------------------------------------------------------------------|-------|-----------------------|
| B880. ¿A cuántas personas conoce personalmente que hayan fallecido por VIH/SIDA? | — — — | personas              |
|                                                                                  | 997   | No sé                 |
|                                                                                  | 998   | Se rehúsa a contestar |

## SECCION PrEP

**LEA: ENTREVISTADOR LEA EN VOZ ALTA:**

*La profilaxis antes de la exposición o PrEP es una medicina que las personas en riesgo de infectarse con el VIH por relaciones sexuales o uso de drogas inyectables. Cuando la medicina se toma a diario como se la ha recetado, el PrEP funciona muy bien para prevenir la infección por VIH. El PrEP aún no está disponible ampliamente en México, pero si está disponible en EUA desde hace varios años ya. El PrEP es seguro, pero algunas personas tienen efectos secundarios como diarrea, náuseas y Dolores de cabeza. Estos efectos secundarios usualmente se desaparecen gradualmente con el tiempo. El PrEP no protege contra otras infecciones de transmisión sexual (ITSs), por lo que es importante que también siga usando condones cuando está tomando PrEP. Como el PrEP no trata la infección de VIH, es también muy importante que vea a un doctor cada tres meses para hacerse las pruebas para VIH y otras ITSs cada tres meses y otros exámenes de laboratorio para asegurarse que todo está bien con su salud.*

B881. Antes de hoy, ¿Habías escuchado sobre personas que son VIH negativo tomando medicamento para VIH o PrEP **antes** de ser expuestos a VIH para proteger de la infección de VIH?

- 1 Si
- 0 No
- 8 Se rehúsa a contestar

*If B881 is not equal to 1, then siga con P B889.*

B882. ¿Has tomando medicamento para VIH o PrEP **antes** de ser expuesto a VIH para protegerte de la infección de VIH?

- 1 Si
- 0 No
- 8 Se rehúsa a contestar

*If B882 is not equal to 1, then siga con P B889.*

B883. ¿En qué ciudad te prescribió un doctor terapia PrEP? (Marque todas las que apliquen)

- Condado de San Diego
- Tijuana
- Otra ciudad en EUA
- Otra ciudad en México
- Otro
- No sé
- Se rehúsa a contestar

*If B883E is not equal to 1, then siga con P B885.*

B884. Por favor, especifique en qué ciudad le recetaron su terapia PrEP

-----

- B885. ¿Actualmente estas tomando terapia PrEP?
- 1 Si
  - 0 No
  - 7 No sé
  - 8 Se rehúsa a contestar

*If B885 is not equal to 1, then siga con P B889.*

B886. ¿Cuándo comenzaste tu terapia PrEP actual? **[ENTREVISTADOR: PON UNA FECHA APROXIMADA SI EL PARTICIPANTE NO RECUERDA EXACTAMENTE CUANDO FUE]**

- \_\_\_ / \_\_\_ mm / aaaa
- 2097 No sé (Año)
- 2098 Se rehúsa a contestar (Año)

B887. ¿Cuál terapia PrEP estas tomando actualmente? (Escoja una)

- 01 Truvada (una vez al día, oral)
- 02 Maraviroc (una vez al día, oral)
- 03 Rilpivirine (una vez al mes, inyección)
- 04 Dapivirine (anillo vaginal se usa 4 semanas a la vez)
- 05 Tenofovir (gel insertado rectal/vaginal)
- 06 Cabotegravir (PrEP inyectable)
- 07 Otro
- 97 No sé
- 98 Se rehúsa a contestar

***If B887 is not equal to 7, then siga con P B889.***

B888. Por favor especifica qué otra terapia PrEP estas tomando.

-----

B889. ¿Qué tipo de producto PrEP estarías interesado/a en tomar? (Marque todas las que apliquen)

- Una pastilla diaria
- Una inyección cada 2 semanas
- (para mujeres) Gel vaginal que debo usar antes de tener relaciones sexuales
- Ninguno
- Se rehúsa a contestar
- No corresponde

***If B889D is equal to 1 and B889A + B889B + B889C is greater than 0 then LEA: "El participante indicó Ninguno junto con otras opciones. Por favor, revise la respuesta." and siga con P B889.***

***LEA: LEA: Ahora le haré preguntas sobre su salud sexual en los últimos 6 meses.***

B890. En los últimos 6 meses, ha tenido alguno de los siguientes síntomas? **Lea en voz alta la lista**  
(Marque todas las que apliquen)

- Orinar frecuentemente o orinar con dolor
- Ulceras dolorosas o ampollas en sus genitales
- Verrugas en sus genitales
- Desecho o goteo por sus genitales
- Comezón en su área genital
- Sangrado después de tener sexo
- No he tenido ninguno de estos síntomas
- No sé
- Se rehúsa a contestar

*If B890G is equal to 1 and B890A + B890B + B890C + B890D + B890E + B890F is greater than 0 then LEA: "El participante indicó "No he tenido ninguno de estos síntomas" junto con otras opciones. Por favor, revise la respuesta." and siga con P B890.*



B891. **En los últimos 6 meses, lo han diagnosticado con alguno de los siguientes problemas de salud? Lea en voz alta la lista** (Marque todas las que apliquen)

- Gonorrea o goteo por genitales
- Clamidia, uretritis no gonocócica, uretritis no específica
- Sífilis (RPR, VDRL)
- Verrugas genitales, (en, sobre o alrededor del área genital)
- Verrugas anales, (en, sobre o alrededor del ano)
- Chancro (lesión o ulcera en o alrededor de la vagina, pene o ano)
- Hepatitis B
- Hepatitis C
- Tricomoniasis
- Enfermedad Pélvica Inflamatoria
- Candidiasis Vaginal
- Cáncer Cervical
- Infección de Transmisión Sexual no sabe cual
- Otros problemas de la mujer
- Nunca he sido diagnosticada con ninguna infección de transmisión sexual
- No sé
- Se rehúsa a contestar

***If B891O is equal to 1 and B891A + B891B + B891C + B891D + B891E + B891F + B891G + B891H + B891I + B891J + B891K + B891L + B891M + B891N is greater than 0 then LEA: "El participante indicó "No he tenido ninguno de estos síntomas" junto con otras opciones. Por favor, revise la respuesta." and siga con P B891.***

***If B891N is not equal to 1, then siga con P B893.***

B892. Por favor díganos sobre qué otro problema femenino

\_\_\_\_\_

B893. En los últimos 6 meses, ¿algún doctor o enfermera le dió algún tratamiento o medicina para tratar cualquier síntoma en sus genitales?

- 1 Si
- 0 No
- 8 Se rehúsa a contestar

## COMPORTAMIENTO SEXUAL

**LEA:** *LEA: Le agradezco su cooperación, buen trabajo. Casi terminamos. Ahora le preguntaré sobre sus experiencias sexuales en los últimos seis meses. Si usted ha estado en prisión/cárcel durante ese tiempo, estas preguntas se refieren al tiempo en que usted NO estaba en prisión/cárcel. Nuevamente, sé que estas preguntas pueden ser incómodas para contestar, pero serán de mucha utilidad para ayudarnos a prevenir enfermedades a usted y personas como usted. Por favor trate de ser lo más honesto que pueda. Para estas preguntas, cuando yo diga sexo se refiere a sexo oral, vaginal o anal. Cuando decimos usar protección nos referimos a usar un condón de hombre o uno de mujer o una barrera para prevenir el contacto de fluidos corporales durante la actividad sexual.*

B894. ¿Qué edad tenías la **primera vez** que tuviste sexo vaginal o anal consensual. Por sexo consensual, quiero decir que tú aceptaste tener sexo por tu propia cuenta. (Entrevistador: Por favor ingresar 0 para Nunca he tenido sexo consensual.)

— — años  
98 Se rehúsa a contestar

*If B894 is greater than A1 and B894 is not equal to 98 then LEA: "El participante ha respondido con un período de tiempo mayor que su edad. Por favor revise las respuestas." and siga con P B894.*

*If B894 is equal to 0 or B894 is equal to 98, then siga con P B896.*

B895. La primera vez que tuviste sexo, ¿fue con un hombre o una mujer? (Escoja una)

1 Hombre  
2 Mujer  
3 Los dos  
8 Se rehúsa a contestar

B896. ¿Cómo te identificas (sexo)? (Escoja una)

1 Heterosexual  
2 Homosexual/Gay/Lesbiana  
3 Bisexual  
4 Otro  
8 Se rehúsa a contestar

*If B896 is equal to 4 then siga con P B897*

*If not, then siga con P instrucción antes de B898.*

B897. Por favor especifica de qué otra manera te identificas

-----

*If B26 is equal to 1 then siga con P instrucción antes de B898*

*If not, then siga con P B899.*

**LEA:** *LEA: A continuación le voy a mostrar algunas fotos. Esta foto es de un pene que ha sido circuncidado (le han quitado la piel que cubre la punta del pene), y ésta es de un pene que no ha sido circuncidado (la piel que cubre la punta todavía sigue allí).*

B898. ¿Ha sido usted circuncidado? **Entrevistador:** *LEER: Esta foto es de un pene que ha sido circuncidado (le han quitado la piel que cubre la punta del pene), y ésta es de un pene que no ha sido circuncidado (la piel que cubre la punta todavía sigue allí).*

- 1 Si
- 0 No
- 8 Se rehúsa a contestar

B899. ¿Con cuántas mujeres has tenido sexo en toda tu vida? **(LEER: Recuerda que, por sexo, me refiero a sexo vaginal, anal, u oral) (ENTREVISTADOR: Por favor usar 0 si el participante Nunca ha tenido sexo con mujeres**

- \_\_\_\_\_ Mujeres
- 9998 Se rehúsa a contestar

B900. ¿Con cuántos hombres has tenido sexo en toda tu vida? **(LEER: Recuerda que, por sexo, me refiero a sexo vaginal, anal, u oral) (ENTREVISTADOR: Por favor usar 0 si el participante Nunca ha tenido sexo con hombres.)**

- \_\_\_\_\_ Hombres
- 9998 Se rehúsa a contestar

B901. En los últimos **6 meses**, ¿ha tenido relaciones sexuales?

- 1 Si
- 0 No
- 8 Se rehúsa a contestar

*If B901 is not equal to 1, then siga con P B944.*

B902. ¿En qué ciudad tuviste sexo en los últimos 6 meses? (Marque todas las que apliquen)

- Condado de San Diego
- Tijuana
- Otra ubicación en USA-EUA
- Otra ubicación en México
- Otro lugar
- No sé
- Se rehúsa a contestar

*If B902E is equal to 1 then siga con P B903*

*If not, then siga con P B904.*

B903. Por favor especifique en qué lugar tuvo relaciones sexuales en los últimos 6 meses

-----

B904. Durante los **últimos 6 meses**, ¿ha tenido relaciones sexuales con hombres, mujeres o ambos? (Escoja una)

- 1 Hombres
- 2 Mujeres
- 3 Los dos
- 8 Se rehúsa a contestar

**LEA:** *LEA: Ahora le voy a preguntar de su pareja regular. Por regular, nos referimos a alguien con quien se siente comprometido/a más que ninguna otra persona y con quien usted tiene relaciones sexuales*

B905. En los **últimos 6 meses**, ¿tuvo una **pareja regular** con la cual se sintiera comprometida más que con ninguna otra persona y con quien usted tiene relaciones sexuales?

- 1 Si
- 0 No
- 8 Se rehúsa a contestar

*If B905 is not equal to 1, then siga con P instrucción antes de B916.*

B906. ¿Cuál es el sexo de esta pareja sexual? (Escoja una)

- 1 Hombre
- 2 Mujer
- 3 Transgénero
- 8 Se rehúsa a contestar

*If B906 is not equal to 3, then siga con P B908.*

B907. Si es transgénero, selecciona cuál (Escoja una)

- 1 Mujer a hombre
- 2 Hombre a Mujer
- 8 Se rehúsa a contestar

B908. ¿Era esta pareja regular un cliente?

- 1 Si
- 0 No
- 8 Se rehúsa a contestar

*If B906 is equal to 1 or B907 is equal to 2 then siga con P B909*

*If not, then siga con P B910.*

B909. ¿Está circuncidada su pareja regular?

- 1 Si
- 0 No
- 7 No sé
- 8 Se rehúsa a contestar

- B910. ¿En qué país vive esta persona? (Escoja una)
- |   |                       |
|---|-----------------------|
| 1 | EUA-USA               |
| 2 | México                |
| 3 | Otro                  |
| 8 | Se rehúsa a contestar |

***If B910 is not equal to 3, then siga con P B912.***

B911. Por favor especifique en qué otro país vive esta persona

-----

B912. En los últimos 6 meses, ¿qué tan seguido tuvo sexo vaginal con su pareja estable? (Escoja una)

- |   |                                  |
|---|----------------------------------|
| 1 | Nunca                            |
| 2 | Una o dos veces                  |
| 3 | Cada dos o tres meses            |
| 4 | Cada dos o tres semanas          |
| 5 | Por lo menos una vez a la semana |
| 6 | Varias veces a la semana         |
| 8 | Se rehúsa a contestar            |

B913. En los últimos 6 meses, ¿qué tan seguido tuvo sexo anal con su pareja estable? (Escoja una)

- |   |                                  |
|---|----------------------------------|
| 1 | Nunca                            |
| 2 | Una o dos veces                  |
| 3 | Cada dos o tres meses            |
| 4 | Cada dos o tres semanas          |
| 5 | Por lo menos una vez a la semana |
| 6 | Varias veces a la semana         |
| 8 | Se rehúsa a contestar            |

B914. En los **últimos 6 meses**, cuando usted tuvo relaciones sexuales con su **pareja regular**, ¿qué tan seguido usó condón? (Escoja una)

- 1 Nunca
- 2 A veces
- 3 Casi la mitad de las ocasiones
- 4 Seguido
- 5 Siempre
- 8 Se rehúsa a contestar

B915. **En los últimos seis meses Tuvo usted sexo anal SIN PROTECCIÓN (sin condón) la última vez que estuvo con su pareja regular?**

- 1 Si
- 0 No
- 8 Se rehúsa a contestar
- 9 No corresponde

**LEA:** *LEA: Ahora le voy a preguntar de su pareja casual. Por casual, nos referimos a parejas con quien tiene relaciones sexuales pero no recibe bienes o servicios a cambio de sexo, aparte de su pareja regular.*

B916. En los **últimos 6 meses**, ¿con cuántas parejas **casuales** tuvo relaciones sexuales aparte de su pareja regular?

- — — — parejas
- 9998 Se rehúsa a contestar

***If B916 is equal to 0 or B916 is equal to 9998, then siga con P B940.***



B917. ¿Estas parejas casuales fueron clientes/alguien que te dio dinero, drogas o algo más a cambio de sexo?

- 1 Si
- 0 No
- 8 Se rehúsa a contestar

B918. ¿Cuántos de estas parejas casuales ([Respuesta a P B916]) eran hombres?

- — — —
- 9998 Se rehúsa a contestar

*If B918 is greater than B916 and B918 is not equal to 9998 then LEA: "La respuesta del participante debe ser menor o igual al número de parejas casuales con las que tiene relaciones sexuales además de la pareja habitual. Por favor revise las respuestas." and siga con P B916.*

*If B918 is equal to 0 or B918 is equal to 9998, then siga con P instrucción antes de B922.*

B919. ¿Cuántas parejas hombres eran de EUA-USA?

- — — —
- 9998 Se rehúsa a contestar

*If B919 is greater than B918 and B919 is not equal to 9998 then LEA: "La respuesta del participante debe ser menor o igual al número de parejas casuales masculinas con las que tiene relaciones sexuales además de la pareja habitual. Por favor revise las respuestas." and siga con P B919.*

*If B919 is equal to B918, then siga con P instrucción antes de B922.*

B920. ¿Cuántas parejas hombres eran de México?

- — — —
- 9998 Se rehúsa a contestar

*If B919 + B920 is greater than B918 and B919 is not equal to 9998 and B920 is not equal to 9998 then LEA: "La respuesta del participante debe ser menor o igual al número de parejas casuales masculinas con las que tiene relaciones sexuales además de la pareja habitual. Por favor revise las respuestas." and siga con P B920.*

*If B919 + B920 is equal to B918, then siga con P instrucción antes de B922.*

B921. ¿Cuántas parejas hombres eran de otro país?

- — — —
- 9998 Se rehúsa a contestar

***If B919 + B920 + B921 is greater than B918 and B919 is not equal to 9998 and B920 is not equal to 9998 and B921 is not equal to 9998 then LEA: "La respuesta del participante debe ser menor o igual al número de parejas casuales masculinas con las que tiene relaciones sexuales además de la pareja habitual. Por favor revise las respuestas." and siga con P B921.***

***If B918 is equal to B916, then siga con P instrucción antes de B930.***

B922. ¿Cuántas de estas parejas casuales mujeres ([Respuesta a P B916]) eran mujeres?

— — — —

9998 Se rehúsa a contestar

***If B918 + B922 is greater than B916 and B918 is not equal to 9998 and B922 is not equal to 9998 then LEA: "La respuesta del participante debe ser menor o igual al número de parejas casuales con las que tiene relaciones sexuales además de la pareja habitual. Por favor revise las respuestas." and siga con P B916.***

***If B922 is equal to 0 or B922 is equal to 9998, then siga con P instrucción antes de B926.***

B923. ¿Cuántas parejas mujeres eran de EUA-USA?

— — — —

9998 Se rehúsa a contestar

***If B923 is greater than B922 and B923 is not equal to 9998 then LEA: "La respuesta del participante debe ser menor o igual al número de parejas ocasionales femeninas con las que tiene relaciones sexuales además de su pareja habitual. Por favor revise las respuestas." and siga con P B923.***

***If B923 is equal to B922, then siga con P instrucción antes de B926.***

B924. ¿Cuántas parejas mujeres eran de México?

— — — —

9998 Se rehúsa a contestar

***If B923 + B924 is greater than B922 and B923 is not equal to 9998 and B924 is not equal to 9998 then LEA: "La respuesta del participante debe ser menor o igual al número de parejas ocasionales femeninas con las que tiene relaciones sexuales además de su pareja habitual. Por favor revise las respuestas." and siga con P B924.***

***If B923 + B924 is equal to B922, then siga con P instrucción antes de B926.***

B925. ¿Cuántas parejas mujeres eran de otro país?

— — — —

9998 Se rehúsa a contestar

***If B923 + B924 + B925 is greater than B922 and B923 is not equal to 9998 and B924 is not equal to 9998 and B925 is not equal to 9998 then LEA: "La respuesta del participante debe ser menor o igual al número de parejas ocasionales femeninas con las que tiene relaciones sexuales además de su pareja habitual. Por favor revise las respuestas." and siga con P B925.***

***If B918 + B922 is equal to B916, then siga con P instrucción antes de B930.***

B926. ¿Cuántas de estas parejas casuales mujeres ([Respuesta a P B916]) eran transgéneros?

— — — —

9998

Se rehúsa a contestar

***If B918 + B922 + B926 is not equal to B916 and B918 is not equal to 9998 and B922 is not equal to 9998 and B926 is not equal to 9998 then LEA: "La respuesta del participante debe ser menor o igual a la cantidad de parejas ocasionales transgénero con las que tiene relaciones sexuales además de su pareja habitual. Por favor revise las respuestas." and siga con P B916.***

***If B926 is equal to 0 or B926 is equal to 9998, then siga con P instrucción antes de B930.***

B927. ¿Cuántas parejas transgéneros eran de EUA-USA?

— — — —

9998

Se rehúsa a contestar

***If B927 is greater than B926 and B927 is not equal to 9998 then LEA: "La respuesta del participante debe ser menor o igual a la cantidad de parejas ocasionales transgénero con las que tiene relaciones sexuales además de su pareja habitual. Por favor revise las respuestas." and siga con P B927.***

***If B927 is equal to B926, then siga con P instrucción antes de B930.***

B928. ¿Cuántas parejas transgéneros eran de México?

— — — —

9998

Se rehúsa a contestar

***If B927 + B928 is greater than B926 and B927 is not equal to 9998 and B928 is not equal to 9998 then LEA: "La respuesta del participante debe ser menor o igual a la cantidad de parejas ocasionales transgénero con las que tiene relaciones sexuales además de su pareja habitual. Por favor revise las respuestas." and siga con P B928.***

***If B927 + B928 is equal to B926, then siga con P instrucción antes de B930.***

B929. ¿Cuántas parejas transgéneros eran de otros países?

9998

Se rehúsa a contestar

*If B927 + B928 + B929 is greater than B926 and B927 is not equal to 9998 and B928 is not equal to 9998 and B929 is not equal to 9998 then LEA: "La respuesta del participante debe ser menor o igual a la cantidad de parejas ocasionales transgénero con las que tiene relaciones sexuales además de su pareja habitual. Por favor revise las respuestas." and siga con P B929.*

*If B922 is greater than 0 and B922 is not equal to 9998 then siga con P B930*

*If not, then siga con P instrucción antes de B934.*

B930. En los últimos 6 meses, ¿qué tan seguido tuviste sexo vaginal con tus parejas casuales mujeres? (Escoja una)

- |   |                                  |
|---|----------------------------------|
| 1 | Nunca                            |
| 2 | Una o dos veces                  |
| 3 | Cada dos o tres meses            |
| 4 | Cada dos o tres semanas          |
| 5 | Por lo menos una vez a la semana |
| 8 | Se rehúsa a contestar            |

*If B930 is equal to 1 or B930 is equal to 8, then siga con P B932.*

B931. En los últimos seis meses, ¿tuvo sexo vaginal SIN PROTECCIÓN (sin condón) la última vez que tuvo sexo con su pareja casual mujer?

- |   |                       |
|---|-----------------------|
| 1 | Si                    |
| 0 | No                    |
| 8 | Se rehúsa a contestar |
| 9 | No corresponde        |

B932. En los últimos 6 meses, que tan seguido tuvo sexo anal con sus parejas casuales mujeres?  
(Escoja una)

- |   |                                  |
|---|----------------------------------|
| 1 | Nunca                            |
| 2 | Una o dos veces                  |
| 3 | Cada dos o tres meses            |
| 4 | Cada dos o tres semanas          |
| 5 | Por lo menos una vez a la semana |
| 8 | Se rehúsa a contestar            |

*If B932 is equal to 1 or B932 is equal to 8, then siga con P instrucción antes de B934.*

B933. **¿Tuvo sexo anal SIN PROTECCIÓN (sin condón) la última vez que tuvo sexo con su pareja casual mujer?**

- |   |                       |
|---|-----------------------|
| 1 | Si                    |
| 0 | No                    |
| 8 | Se rehúsa a contestar |
| 9 | No corresponde        |

*If B918 is greater than 0 and B918 is not equal to 9998 then siga con P B934*

*If not, then siga con P instrucción antes de B938.*

B934. En los últimos 6 meses, que tan seguido tuvo usted sexo vaginal con sus parejas casuales hombres? (Escoja una)

- |   |                                  |
|---|----------------------------------|
| 1 | Nunca                            |
| 2 | Una o dos veces                  |
| 3 | Cada dos o tres meses            |
| 4 | Cada dos o tres semanas          |
| 5 | Por lo menos una vez a la semana |
| 8 | Se rehúsa a contestar            |

*If B934 is equal to 1 or B934 is equal to 8, then siga con P B936.*

**B935. ¿Tuvo sexo vaginal SIN PROTECCIÓN (sin condón) la última vez que tuvo sexo con su pareja casual hombre?**

- |   |                       |
|---|-----------------------|
| 1 | Si                    |
| 0 | No                    |
| 8 | Se rehúsa a contestar |
| 9 | No corresponde        |

**B936. En los últimos 6 meses, ¿que tan frecuentemente tuvo sexo anal con tus parejas casuales hombres? (Escoja una)**

- |   |                                  |
|---|----------------------------------|
| 1 | Nunca                            |
| 2 | Una o dos veces                  |
| 3 | Cada dos o tres meses            |
| 4 | Cada dos o tres semanas          |
| 5 | Por lo menos una vez a la semana |
| 8 | Se rehúsa a contestar            |

*If B936 is equal to 1 or B936 is equal to 8, then siga con P instrucción antes de B938.*

**B937. ¿Tuvo sexo anal SIN PROTECCIÓN (sin condón) la última vez que tuvo sexo con su pareja casual hombre?**

- |   |                       |
|---|-----------------------|
| 1 | Si                    |
| 0 | No                    |
| 8 | Se rehúsa a contestar |
| 9 | No corresponde        |

*If B926 is greater than 0 and B926 is not equal to 9998 then siga con P B938*

*If not, then siga con P B940.*

B938. En los últimos 6 meses, ¿qué tan frecuentemente tuvo sexo con sus parejas casuales transgénero? (Escoja una)

- |   |                                  |
|---|----------------------------------|
| 1 | Nunca                            |
| 2 | Uno o dos veces                  |
| 3 | Cada dos o tres meses            |
| 4 | Cada dos o tres semanas          |
| 5 | Por lo menos una vez a la semana |
| 8 | Se rehúsa a contestar            |

*If B938 is equal to 1 or B938 is equal to 8, then siga con P B940.*

B939. **¿Tuvo sexo SIN PROTECCIÓN (sin condón) la última vez que tuvo sexo con su pareja casual transgénero?**

- |   |                       |
|---|-----------------------|
| 1 | Si                    |
| 0 | No                    |
| 8 | Se rehúsa a contestar |
| 9 | No corresponde        |

B940. En los últimos **6 meses**, cuando tuvo relaciones sexuales, ¿qué tan seguido había estado borracho(a) **dentro de un periodo de 2 horas antes o durante el sexo?** (Escoja una)

- |   |                                |
|---|--------------------------------|
| 1 | Nunca                          |
| 2 | A veces                        |
| 3 | Casi la mitad de las ocasiones |
| 4 | Seguido                        |
| 5 | Siempre                        |
| 8 | Se rehúsa a contestar          |

B941. En los **últimos 6 meses, cuando tuvo relaciones sexuales**, ¿qué tan seguido había usado drogas **dentro de un periodo de 2 horas antes o durante el sexo?** (Escoja una)

- |   |                                |
|---|--------------------------------|
| 1 | Nunca                          |
| 2 | A veces                        |
| 3 | Casi la mitad de las ocasiones |
| 4 | Seguido                        |
| 5 | Siempre                        |
| 8 | Se rehúsa a contestar          |

B942. ¿Alguna vez ha tenido relaciones sexuales con alguien que usted en ese tiempo sabía que estaba infectado con VIH/SIDA?

- |   |                       |
|---|-----------------------|
| 1 | Si                    |
| 0 | No                    |
| 8 | Se rehúsa a contestar |

*If B942 is equal to 1 then siga con P B943*

*If not, then siga con P B944.*

B943. Si es así ¿con qué frecuencia usó un condón? (Escoja una)

- |   |                                |
|---|--------------------------------|
| 1 | Nunca                          |
| 2 | A veces                        |
| 3 | Casi la mitad de las ocasiones |
| 4 | Seguido                        |
| 5 | Siempre                        |
| 8 | Se rehúsa a contestar          |



B944. ¿Alguien le ha dado algo que usted necesitaba (como dinero, drogas, albergue, comida o transportación o protección) a cambio de sexo?

- 1 Si
- 0 No
- 8 Se rehúsa a contestar

*If B917 is equal to 1 then siga con P B945*

*If not, then siga con P instrucción antes de B946.*

B945. Antes dijiste que tu(s) pareja(s) ocasional(s) te daban dinero, drogas u otra cosa a cambio de sexo. ¿Podría, por favor, reconsiderar la pregunta: ¿Alguien le ha dado algo que usted necesitaba (como dinero, drogas, albergue, comida o transportación o protección) a cambio de sexo?

- 1 Si
- 0 No
- 8 Se rehúsa a contestar

*If B944 is not equal to 1 and B945 is not equal to 1, then siga con P instrucción antes de B973.*

B946. Cuando alguien le ha dado algo que usted necesitaba a cambio de sexo, ¿qué le dió? **(Entrevistador: Lea la lista y marque todas las respuestas que apliquen.)** (Marque todas las que apliquen)

- Dinero
- Drogas
- Jeringas
- Alcohol
- Albergue
- Transportación
- Protección
- Comida
- Trabajo
- Ropa
- Regalos
- Otro
- Se rehúsa a contestar

*If B946L is equal to 1 then siga con P B947*

*If not, then siga con P B948.*

B947. Por favor especifique qué otra cosa le dió:

-----

B948. ¿Qué edad tenías la primera vez que alguien te dio algo que tu necesitabas a cambio de sexo?

- años
- 98 Se rehúsa a contestar

*If B948 is greater than A1 and B948 is not equal to 98 then LEA: "El participante ha respondido con un período de tiempo mayor que su edad. Por favor revise las respuestas." and siga con P B948.*

*If B901 is not equal to 1, then siga con P instrucción antes de B973.*

B949. En los **últimos 6 meses**, ¿cuántas personas le han dado algo que usted necesitaba a cambio de tener relaciones sexuales con usted?

— — — — personas  
 9998 Se rehúsa a contestar

*If B949 is equal to 0 or B949 is equal to 9998, then siga con P instrucción antes de B973.*

B950. *¿En qué ciudad (ciudades) alguien te dió algo a cambio de sexo?* (Marque todas las que apliquen)

- Condado de San Diego
- Tijuana
- Otra ciudad en EUA
- Otra ciudad en México
- Otro
- Se rehúsa a contestar

*If B950E is equal to 1 then siga con P B951*

*If not, then siga con P B952.*

B951. Por favor especifique en qué otra ciudad *alguien te dió algo a cambio de sexo*:

-----

B952. En los últimos 6 meses, en promedio, ¿cuántas veces al mes alguien le dio algo que necesitaba a cambio de tener sexo con ellos? **Entrevistador: Si el participante dice "No Se" pregúntele por la respuesta más aproximada.**

— — — —  
 998 Se rehúsa a contestar

B953. Durante los últimos 6 meses, ¿Cuál de los siguientes le ha dado alguien a cambio de tener sexo con ellos? **Entrevistador: Lea las opciones y marque las que apliquen.** (Marque todas las que apliquen)

- Dinero
- Drogas
- Jeringas
- Alcohol
- Albergue
- Transportación
- Protección
- Comida
- Trabajo
- Ropa
- Regalos
- Otro
- Se rehúsa a contestar

*If B953L is equal to 1 then siga con P B954*

*If not, then siga con P B955.*

B954. Por favor especifique qué otra cosa *alguien te dió algo a cambio de sexo:*

-----

B955. En los últimos 6 meses, cuando alguien te doy algo que necesitabas a cambio de sexo, ¿cuántas de estas ([Respuesta a P B949]) personas eran hombres?

-----

9998 Se rehúsa a contestar

***If B955 is greater than B949 and B955 is not equal to 9998 then LEA: "La respuesta del participante debe ser menor o igual a la cantidad de personas que les dieron algo a cambio de sexo. ¡Por favor revise las respuestas y haga las correcciones!" and siga con P B955.***

***If B955 is equal to 0 or B955 is equal to 9998, then siga con P instrucción antes de B959.***

B956. ¿Cuántos hombres que te dieron algo que necesitabas a cambio de sexo eran de: EUA-USA?

— — — —

9998 Se rehúsa a contestar

***If B956 is greater than B955 and B956 is not equal to 9998 then LEA: "La respuesta del participante debe ser menor o igual a la cantidad de hombres que les dieron algo que necesitaban a cambio de sexo. Por favor revise las respuestas." and siga con P B956.***

***If B956 is equal to B955, then siga con P instrucción antes de B959.***

B957. ¿Cuántos hombres que te dieron algo que necesitabas a cambio de sexo eran de México?

— — — —

9998 Se rehúsa a contestar

***If B956 + B957 is greater than B955 and B956 is not equal to 9998 and B955 is not equal to 9998 then LEA: "La respuesta del participante debe ser menor o igual a la cantidad de hombres que les dieron algo que necesitaban a cambio de sexo. Por favor revise las respuestas." and siga con P B957.***

***If B956 + B957 is equal to B955, then siga con P instrucción antes de B959.***

B958. ¿Cuántos hombres que te dieron algo que necesitabas a cambio de sexo eran de otros países?

— — — —

9998 Se rehúsa a contestar

***If B956 + B957 + B958 is greater than B955 and B956 is not equal to 9998 and B957 is not equal to 9998 and B958 is not equal to 9998 then LEA: "La respuesta del participante debe ser menor o igual a la cantidad de hombres que les dieron algo que necesitaban a cambio de sexo. Por favor revise las respuestas." and siga con P B958.***

***If B955 is equal to B949, then siga con P B963.***

B959. En los últimos 6 meses, cuando alguien te dió algo a cambio de sexo, ¿cuántas de estas ([Respuesta a P B949]) personas eran mujeres?

— — — —

9998 Se rehúsa a contestar

*If B955 + B959 is greater than B949 and B955 is not equal to 9998 and B959 is not equal to 9998 then LEA: "La respuesta del participante debe ser menor o igual a la cantidad de personas que les dieron algo a cambio de sexo. Verifique las respuestas y haga las correcciones." and siga con P B959.*

*If B959 is equal to 0 or B959 is equal to 9998, then siga con P B963.*

B960. ¿Cuántas mujeres que te dieron algo que necesitabas a cambio de sexo eran de: EUA-USA?

— — — —

9998 Se rehúsa a contestar

*If B960 is greater than B959 and B960 is not equal to 9998 then LEA: "La respuesta del participante debe ser menor o igual al número de mujeres que les dieron algo que necesitaban a cambio de sexo. Por favor revise las respuestas." and siga con P B960.*

*If B960 is equal to B959, then siga con P B963.*

B961. ¿Cuántas mujeres que te dieron algo que necesitabas a cambio de sexo eran de: México?

— — — —

9998 Se rehúsa a contestar

*If B960 + B961 is greater than B959 and B960 is not equal to 9998 and B959 is not equal to 9998 then LEA: "La respuesta del participante debe ser menor o igual al número de mujeres que les dieron algo que necesitaban a cambio de sexo. Por favor revise las respuestas." and siga con P B961.*

*If B960 + B961 is equal to B959, then siga con P B963.*

B962. ¿Cuántas mujeres que te dieron algo que necesitabas a cambio de sexo eran de otros países?

— — — —

9998 Se rehúsa a contestar

*If B960 + B961 + B962 is greater than B959 and B960 is not equal to 9998 and B961 is not equal to 9998 and B962 is not equal to 9998 then LEA: "La respuesta del participante debe ser menor o igual al número de mujeres que les dieron algo que necesitaban a cambio de sexo. Por favor revise las respuestas." and siga con P B962.*

B963. En los **últimos 6 meses**, cuando alguien le dio algo que usted necesitaba a cambio de sexo, ¿dónde conoció a esta persona? (Marque todas las que apliquen)

- Calle
- Trabajo
- Picadero
- Vecindario
- Escuela
- Bar/Antro
- Hotel
- Periódico/Revista/Internet
- Amigos/Conocidos
- Padrote
- Otro
- Se rehúsa a contestar

*If B963K is not equal to 1, then siga con P B965.*

B964. Por favor especifica qué otro lugar:

-----

B965. Desde que comenzó la pandemia de COVID en Marzo de 2020, ¿el número de personas que le ha dado dinero, drogas o cualquier otra cosa a cambio de tener relaciones sexuales con ellos a cambiado? (Escoja una)

- 1 Más gente
- 2 Menos gente
- 3 Igual
- 8 Se rehúsa a contestar

B966. En los últimos 6 meses, ¿Qué tan seguido tuviste sexo a cambio de algo que tú necesitabas? (Escoja una)

- 1 Una o dos veces al mes
- 2 Una o dos veces al mes
- 3 Al menos una vez a la semana
- 4 Varias veces a la semana
- 5 Varias veces al día
- 8 Se rehúsa a contestar

B967. En los últimos 6 meses, cuando tuvo relaciones sexuales a cambio de algo que necesitaba, ¿qué tan seguido tuvo sexo vaginal? (Escoja una)

- 1 Nunca
- 2 A veces
- 3 Casi la mitad de las ocasiones
- 4 Seguido
- 5 Siempre
- 8 Se rehúsa a contestar

***If B967 is equal to 1 or B967 is equal to 8, then siga con P B969.***



B968. ¿Tuvo sexo vaginal SIN PROTECCIÓN (sin condón) la última vez que tuvo sexo a cambio de algo que necesitaba?

- |   |                       |
|---|-----------------------|
| 1 | Si                    |
| 0 | No                    |
| 8 | Se rehúsa a contestar |
| 9 | No corresponde        |

B969. En los últimos 6 meses, cuando tuvo relaciones sexuales a cambio de algo que necesitaba, ¿qué tan seguido tuvo sexo anal? (Escoja una)

- |   |                                |
|---|--------------------------------|
| 1 | Nunca                          |
| 2 | A veces                        |
| 3 | Casi la mitad de las ocasiones |
| 4 | Seguido                        |
| 5 | Siempre                        |
| 8 | Se rehúsa a contestar          |

*If B969 is equal to 1 or B969 is equal to 8, then siga con P B971.*

B970. ¿Tuvo sexo anal SIN PROTECCIÓN (sin condón) la última vez que tuvo sexo a cambio de algo que necesitaba?

- |   |                       |
|---|-----------------------|
| 1 | Si                    |
| 0 | No                    |
| 8 | Se rehúsa a contestar |
| 9 | No corresponde        |

B971. En los últimos 6 meses, cuando alguien le dió algo que usted necesitaba a cambio de sexo, ¿qué tan seguido se inyectaba drogas con ellos? (Escoja una)

- |   |                                |
|---|--------------------------------|
| 1 | Nunca                          |
| 2 | A veces                        |
| 3 | Casi la mitad de las ocasiones |
| 4 | Seguido                        |
| 5 | Siempre                        |
| 8 | Se rehúsa a contestar          |

*If B971 is equal to 1 or B971 is equal to 8, then siga con P instrucción antes de B973.*

B972. ¿Qué tan seguido compartió la misma jeringa con ellos? (Escoja una)

- |   |                                |
|---|--------------------------------|
| 1 | Nunca                          |
| 2 | A veces                        |
| 3 | Casi la mitad de las ocasiones |
| 4 | Seguido                        |
| 5 | Siempre                        |
| 8 | Se rehúsa a contestar          |

**LEA: NOTA DE PRECAUCIÓN PARA ENTREVISTADOR: Es posible que las siguientes preguntas haya sido malinterpretadas por algunas mujeres, donde dar.. a cambio de tener sexo contigo se haya confundido con recibir... a cambio de tener sexo contigo.**

B973. ¿Alguna vez les ha dado a alguien algo que necesitaban (drogas, dinero, comida, hospedaje, transportación, alcohó o protección)a cambio de tener relaciones sexuales con usted?

- |   |                       |
|---|-----------------------|
| 1 | Si                    |
| 0 | No                    |
| 8 | Se rehúsa a contestar |

*If B973 is not equal to 1, then siga con P B992.*

B974. La/s persona/personas a la que les dió drogas, dinero, comida, hospedaje, transportación, alcohol, o algo que necesitaban eran ¿hombres, mujeres o transgenero? (Marque todas las que apliquen)

- Hombre
- Mujer
- Transgénero
- Se rehúsa a contestar

B975. ¿En qué ciudad (ciudades) estaba cuando le dió drogas, dinero, comida, hospedaje, transportación, alcohol, o algo que necesitaba a alguien? (Marque todas las que apliquen)

- Condado de San Diego
- Tijuana
- Otra ciudad en EUA
- Otra ciudad en México
- Otro
- Se rehúsa a contestar

*If B975E is equal to 1 then siga con P B976*

*If not, then siga con P instrucción antes de B977.*

B976. Por favor especifique en qué otra ciudad (ciudades) estaba cuando le dió drogas, dinero, comida, hospedaje, transportación, alcohol, o algo que necesitaba a alguien?

-----

*If B901 is not equal to 1, then siga con P B992.*

B977. En los **últimos 6 meses**, ¿a cuántas personas les ha dado drogas, dinero, comida, hospedaje, transportación, alcohol, o algo a cambio de tener relaciones sexuales con usted?

- personas
- 9998 Se rehúsa a contestar

*If B977 is equal to 0 or B977 is equal to 9998, then siga con P B992.*

B978. En los últimos 6 meses, ¿en qué ciudad (ciudades) estaba cuando le dió drogas, dinero, comida, hospedaje, transportación, alcohol, o algo que necesitaba a alguien? (Marque todas las que apliquen)

- Condado de San Diego
- Tijuana
- Otra ciudad en EUA
- Otra ciudad en México
- Otro
- Se rehúsa a contestar

*If B978E is equal to 1 then siga con P B979*

*If not, then siga con P B980.*

B979. Por favor especifique en qué otra ciudad (ciudades) estaba cuando le dió drogas, dinero, comida, hospedaje, transportación, alcohol, o algo que necesitaba a alguien?

-----

B980. De estas [Respuesta a P B977] personas, ¿cuántas eran hombres?

-----

9998 Se rehúsa a contestar

*If B980 is greater than B977 and B980 is not equal to 9998 then LEA: "La respuesta del participante debe ser menor o igual a la cantidad de personas a las que les da drogas, dinero, comida, refugio, transporte, alcohol o cualquier otra cosa a cambio de tener relaciones sexuales con usted. Por favor revise las respuestas." and siga con P B980.*

*If B980 is equal to 0 or B980 is equal to 9998, then siga con P instrucción antes de B984.*

B981. ¿Cuántas de estas parejas hombres eran de:EUA-USA?

-----

9998 Se rehúsa a contestar

***If B981 is greater than B980 and B981 is not equal to 9998 then LEA: "La respuesta del participante debe ser menor o igual a la cantidad de hombres a los que les da drogas, dinero, comida, refugio, transporte, alcohol o cualquier otra cosa a cambio de tener relaciones sexuales con usted. Por favor revise las respuestas." and siga con P B981.***

***If B981 is equal to B980, then siga con P instrucción antes de B984.***

B982. ¿Cuántas de estas parejas hombres eran de México?

— — — —

9998

Se rehúsa a contestar

***If B981 + B982 is greater than B980 and B981 is not equal to 9998 and B982 is not equal to 9998 then LEA: "La respuesta del participante debe ser menor o igual a la cantidad de hombres a los que les da drogas, dinero, comida, refugio, transporte, alcohol o cualquier otra cosa a cambio de tener relaciones sexuales con usted. Por favor revise las respuestas." and siga con P B982.***

***If B981 + B982 is equal to B980, then siga con P instrucción antes de B984.***

B983. ¿Cuántas de estas parejas hombres eran de otros países?

— — — —

9998

Se rehúsa a contestar

***If B981 + B982 + B983 is greater than B980 and B981 is not equal to 9998 and B982 is not equal to 9998 and B983 is not equal to 9998 then LEA: "La respuesta del participante debe ser menor o igual a la cantidad de hombres a los que les da drogas, dinero, comida, refugio, transporte, alcohol o cualquier otra cosa a cambio de tener relaciones sexuales con usted. Por favor revise las respuestas." and siga con P B983.***

***If B980 is equal to B977, then siga con P B992.***

B984. De estas [Respuesta a P B977] personas, ¿cuántas eran mujeres?

— — — —

9998

Se rehúsa a contestar

***If B980 + B984 is greater than B977 and B980 is not equal to 9998 and B984 is not equal to 9998 then LEA: "La respuesta del participante debe ser menor o igual a la cantidad de personas a las que les da drogas, dinero, comida, refugio, transporte, alcohol o cualquier otra cosa a cambio de tener relaciones sexuales con usted. Por favor revise las respuestas." and siga con P B984.***

***If B984 is equal to 0 or B984 is equal to 9998, then siga con P instrucción antes de B988.***

B985. ¿Cuántas de estas parejas mujeres eran de EUA-USA?

— — — —

9998

Se rehúsa a contestar

***If B985 is greater than B984 and B985 is not equal to 9998 then LEA: "La respuesta del participante debe ser menor o igual a la cantidad de mujeres a las que les da drogas, dinero, comida, refugio, transporte, alcohol o cualquier otra cosa a cambio de tener relaciones sexuales con usted. Por favor revise las respuestas." and siga con P B985.***

***If B985 is equal to B984, then siga con P instrucción antes de B988.***

B986. ¿Cuántas de estas parejas mujeres eran de México? — — — —

9998

Se rehúsa a contestar

***If B985 + B986 is greater than B984 and B985 is not equal to 9998 and B986 is not equal to 9998 then LEA: "La respuesta del participante debe ser menor o igual a la cantidad de mujeres a las que les da drogas, dinero, comida, refugio, transporte, alcohol o cualquier otra cosa a cambio de tener relaciones sexuales con usted. Por favor revise las respuestas." and siga con P B986.***

***If B985 + B986 is equal to B984, then siga con P instrucción antes de B988.***

B987. ¿Cuántas de estas parejas mujeres eran de otros países?

— — — —

9998

Se rehúsa a contestar

***If B985 + B986 + B987 is greater than B984 and B985 is not equal to 9998 and B986 is not equal to 9998 and B987 is not equal to 9998 then LEA: "La respuesta del participante debe ser menor o igual a la cantidad de mujeres a las que les da drogas, dinero, comida, refugio, transporte, alcohol o cualquier otra cosa a cambio de tener relaciones sexuales con usted. Por favor revise las respuestas." and siga con P B987.***

***If B980 + B984 is equal to B977, then siga con P B992.***

B988. De estas [Respuesta a P B977] personas, ¿cuántas eran transgéneros?

— — — —

9998

Se rehúsa a contestar

***If B980 + B984 + B988 is greater than B977 and B980 is not equal to 9998 and B984 is not equal to 9998 and B988 is not equal to 9998 then LEA: "La respuesta del participante debe ser menor o igual a la cantidad de personas a las que les da drogas, dinero, comida, refugio, transporte, alcohol o cualquier otra cosa a cambio de tener relaciones sexuales con usted. Por favor revise las respuestas." and siga con P B988.***

***If B988 is equal to 0 or B988 is equal to 9998, then siga con P B992.***

B989. ¿Cuántas de estas parejas transgéneros eran de EUA-USA?

— — — —

9998

Se rehúsa a contestar

***If B989 is greater than B988 and B989 is not equal to 9998 then LEA: "La respuesta del participante debe ser menor o igual a la cantidad de personas transgénero a las que le da drogas, dinero, comida, refugio, transporte, alcohol o cualquier otra cosa a cambio de tener relaciones sexuales con usted. Por favor revise las respuestas." and siga con P B989.***

***If B989 is equal to B988, then siga con P B992.***

B990. ¿Cuántas de estas parejas transgéneros eran de México?

— — — —

9998

Se rehúsa a contestar

***If B989 + B990 is greater than B988 and B989 is not equal to 9998 and B990 is not equal to 9998 then LEA: "La respuesta del participante debe ser menor o igual a la cantidad de personas transgénero a las que le da drogas, dinero, comida, refugio, transporte, alcohol o cualquier otra cosa a cambio de tener relaciones sexuales con usted. Por favor revise las respuestas." and siga con P B990.***

***If B989 + B990 is equal to B988, then siga con P B992.***

B991. ¿Cuántas de estas parejas transgéneros eran de otros países?

— — — —

9998

Se rehúsa a contestar

***If B989 + B990 + B991 is greater than B988 and B989 is not equal to 9998 and B990 is not equal to 9998 and B991 is not equal to 9998 then LEA: "La respuesta del participante debe ser menor o igual a la cantidad de personas transgénero a las que le da drogas, dinero, comida, refugio, transporte, alcohol o cualquier otra cosa a cambio de tener relaciones sexuales con usted. Por favor revise las respuestas." and siga con P B991.***

B992. ¿Alguna vez alguien lo/la ha forzado a tener relaciones sexuales por medio de fuerza física o presión emocional? (Recuerde, puede ser sexo vaginal, oral o anal)

- 1 Si  
0 No  
8 Se rehúsa a contestar

*If B992 is not equal to 1, then siga con P instrucción antes de B1001.*

B993. ¿Qué edad tenías la PRIMERA VEZ que alguien te forzó a tener sexo?

- — años  
98 Se rehúsa a contestar

*If B993 is greater than A1 and B993 is not equal to 98 then LEA: "El participante ha respondido con un período de tiempo mayor que su edad. Por favor revise las respuestas." and siga con P B993.*

B994. La PRIMERA VEZ que alguien lo/la forzó a tener sexo ¿quién lo forzó a tener relaciones sexuales? (Marque todas las que apliquen)

- Familiar  
— Esposo (a)  
— Amigo (a)  
— Conocido  
— Desconocido  
— Otra Pareja Sexual  
— Cliente Sexual  
— Padrote  
— Policía / Figura Autoritaria  
— Otro  
— Se rehúsa a contestar

*If B994J is not equal to 1, then siga con P instrucción antes de B996.*



B995. Por favor especifique quién otro:

-----

*If B901 is not equal to 1, then siga con P instrucción antes de B1001.*

B996. En los **últimos 6 meses**, ¿alguien lo ha forzado a tener relaciones sexuales por medio de fuerza física o presión emocional? (Recuerde, puede ser sexo vaginal, oral o anal)

- 1 Si
- 0 No
- 8 Se rehúsa a contestar

*If B996 is not equal to 1, then siga con P instrucción antes de B1001.*

B997. ¿En qué ciudad fuiste forzado/a a tener sexo en los últimos 6 meses? (Marque todas las que apliquen)

- \_\_\_ Condado de San Diego
- \_\_\_ Tijuana
- \_\_\_ Otra ciudad en EUA
- \_\_\_ Otra ciudad en México
- \_\_\_ Otro
- \_\_\_ Se rehúsa a contestar

*If B997E is not equal to 1, then siga con P B999.*

B998. Por favor especifique en qué otra ciudad:

-----

B999. En los últimos 6 meses, ¿quién lo/a forzó a tener relaciones sexuales? (Marque todas las que apliquen)

- Familiar
- Esposo (a)
- Amigo (a)
- Conocido
- Desconocido
- Otra Pareja Sexual
- Cliente Sexual
- Padrote
- Policía / Figura Autoritaria
- Otro
- Se rehúsa a contestar

***If B999J is not equal to 1, then siga con P instrucción antes de B1001.***

B1000. Por favor especifique quién otro lo ha forzado a tener relaciones sexuales por medio de fuerza física o presión emocional:

-----

***LEA: LEA: Ahora le voy a preguntar sobre las veces que ha tenido relaciones sexuales con agentes del orden. Estos pueden haber sido encuentros que fueron voluntarios o involuntarios. Estas preguntas son sobre encuentros ocurrieron en México y no en los Estados Unidos o cualquier otro país.***

- B1001. ¿Alguna vez ha tenido sexo con un agente del orden?
- 1 Si
  - 0 No
  - 8 Se rehúsa a contestar

***If B1001 is not equal to 1 and B901 is not equal to 1, then siga con P final de la entrevista.***

B1002. ¿Cuántas veces ha tenido relaciones sexuales con agentes del orden en los **últimos 6 meses**?

— — — — # de veces  
 9998 Se rehúsa a contestar

*If B1002 is equal to 0 or B1002 is equal to 9998, then siga con P final de la entrevista.*

B1003. De las [Respuesta a P B1002] veces que ha tenido relaciones sexuales con agentes del orden **en los últimos 6 meses**, ¿cuántas veces fue para evadir arresto u otro castigo?

— — — — # de veces  
 9998 Se rehúsa a contestar

*If B1003 is greater than B1002 and B1003 is not equal to 9998 then LEA: "La respuesta del participante debe ser menor o igual al número de veces que tuvo relaciones sexuales con un agente de la ley. Por favor revise las respuestas." and siga con P B1003.*

*If B1003 is equal to 0 or B1003 is equal to 9998, then siga con P final de la entrevista.*

B1004. De esas [Respuesta a P B1002] veces, ¿cuántas veces ocurrió esto en EUA-USA?

— — — —  
 9998 Se rehúsa a contestar

*If B1004 is greater than B1003 and B1004 is not equal to 9998 then LEA: "La respuesta del participante debe ser menor o igual al número de veces que tuvo relaciones sexuales con un oficial de la ley para evitar el arresto u otro castigo. Por favor revise las respuestas." and siga con P B1004.*

*If B1004 is equal to B1003, then siga con P final de la entrevista.*

B1005. De esas [Respuesta a P B1002] veces, ¿cuántas veces ocurrió esto en México?

— — — —  
 9998 Se rehúsa a contestar

*If B1004 + B1005 is greater than B1003 and B1004 is not equal to 9998 and B1005 is not equal to 9998 then LEA: "La respuesta del participante debe ser menor o igual al número de veces que tuvo relaciones sexuales con un oficial de la ley para evitar el arresto u otro castigo. Por favor revise las respuestas." and siga con P B1005.*

**LEA: FINAL DE LA ENTREVISTA.**

**LEA: Este es el final del cuestionario. Muchas gracias por su valioso tiempo y cooperación.**

**DISQ1 = If(A1 is less than 18 or A1 is equal to 998 or A3 is greater than 30 or A3 is equal to 9998 or A7 is equal to 3 or A7 is equal to 8, 1, 0)**

**DISQ2 = If(A7 is equal to 1 and (A8 is equal to 7 or A8 is equal to 8) or A7 is equal to 2 and A12 is not equal to 1, 1, 0)**

**DISQ3 = If(GROUP is equal to 0, 1, 0)**

**DISQALL = DISQ1 + DISQ2 + DISQ3**

**If DISQALL is greater than 0 then siga con P final de la entrevista**

**If not, then siga con P final de la entrevista.**

**LEA: ENTREVISTADOR: EL PARTICIPANTE NO CALIFICA! FINAL DE LA ENTREVISTA.  
Agradezca al participante por su tiempo.**

**LEA: Fin de entrevista.**

## **La Frontera Project**

# Supplemental Survey

Disclaimer: This survey has been formatted for programming into QDS and is not intended to be administered on pencil and paper

PI: Steffanie Strathdee  
10-18-2021

LaFrontera.Supplemental.20210820 (English)

**READ: La Frontera  
Supplemental Interview  
English**

**VERSION = 20210820**

Q1. Interviewer: Please enter interview date.                    \_\_\_ / \_\_\_ / \_\_\_\_\_                    mm / dd / yyyy

**If Q1 is greater than TODAY and TODAY is not equal to "missing" then READ: "That date occurs in the future. Please check the entry." and skip to Q1.**

Q2. Interviewer Initials.                    \_\_\_\_\_

Q3. City of the Interview

**Interviewer, it is crucial that you enter the interview location correctly!**

(Choose one)

1            San Diego

2            Tijuana

Q4. Interviewer, how will this interview be conducted? (Choose one)

1            In Person, Inside

2            In Person, Outside

3            Video call (e.g., zoom, skype)

4            Audio Call (e.g., phone, zoom)

5            Other

8            Refuse to Answer

**If Q4 is not equal to 5, then skip to Q6.**

Q5. Please, specify Other.

-----

Q6. Participant ID Number (e.g., LF001). \_\_\_\_\_

*ID1 = SubString(Q6, 0, 1)*

*ID2 = SubString(Q6, 1, 1)*

*ID3 = SubString(Q6, 2, 1)*

*ID4 = SubString(Q6, 3, 1)*

*ID5 = SubString(Q6, 4, 1)*

*IDSTUDY = Concatenated(ID1, ID2)*

*If IDSTUDY is not equal to LF then READ: "Check ID." and skip to Q6.*

*If ID3 is not equal to 0 and ID3 is not equal to 1 and ID3 is not equal to 2 and ID3 is not equal to 3 and ID3 is not equal to 4 and ID3 is not equal to 5 and ID3 is not equal to 6 and ID3 is not equal to 7 and ID3 is not equal to 8 and ID3 is not equal to 9 or ID4 is not equal to 0 and ID4 is not equal to 1 and ID4 is not equal to 2 and ID4 is not equal to 3 and ID4 is not equal to 4 and ID4 is not equal to 5 and ID4 is not equal to 6 and ID4 is not equal to 7 and ID4 is not equal to 8 and ID4 is not equal to 9 or ID5 is not equal to 0 and ID5 is not equal to 1 and ID5 is not equal to 2 and ID5 is not equal to 3 and ID5 is not equal to 4 and ID5 is not equal to 5 and ID5 is not equal to 6 and ID5 is not equal to 7 and ID5 is not equal to 8 and ID5 is not equal to 9 then READ: "Check ID." and skip to Q6.*

Q7. Please enter the SCREENER ID of the Subject (e.g., LF0001).

**Note to the Interviewer: Please do not confuse the screener number with the Subject ID number!**

\_\_\_\_\_

*SCRID1 = SubString(Q7, 0, 1)*

*SCRID2 = SubString(Q7, 1, 1)*

*SCRID3 = SubString(Q7, 2, 1)*

*SCRID4 = SubString(Q7, 3, 1)*

*SCRID5 = SubString(Q7, 4, 1)*

*SCRID6 = SubString(Q7, 5, 1)*

*IDSCREEN = Concatenated(SCRID1, SCRID2)*

**If IDSCREEN is not equal to LF then READ: "Check SCRID." and skip to Q7.**

**If SCRID3 is not equal to 0 and SCRID3 is not equal to 1 and SCRID3 is not equal to 2 and SCRID3 is not equal to 3 and SCRID3 is not equal to 4 and SCRID3 is not equal to 5 and SCRID3 is not equal to 6 and SCRID3 is not equal to 7 and SCRID3 is not equal to 8 and SCRID3 is not equal to 9 or SCRID4 is not equal to 0 and SCRID4 is not equal to 1 and SCRID4 is not equal to 2 and SCRID4 is not equal to 3 and SCRID4 is not equal to 4 and SCRID4 is not equal to 5 and SCRID4 is not equal to 6 and SCRID4 is not equal to 7 and SCRID4 is not equal to 8 and SCRID4 is not equal to 9 or SCRID5 is not equal to 0 and SCRID5 is not equal to 1 and SCRID5 is not equal to 2 and SCRID5 is not equal to 3 and SCRID5 is not equal to 4 and SCRID5 is not equal to 5 and SCRID5 is not equal to 6 and SCRID5 is not equal to 7 and SCRID5 is not equal to 8 and SCRID5 is not equal to 9 or SCRID6 is not equal to 0 and SCRID6 is not equal to 1 and SCRID6 is not equal to 2 and SCRID6 is not equal to 3 and SCRID6 is not equal to 4 and SCRID6 is not equal to 5 and SCRID6 is not equal to 6 and SCRID6 is not equal to 7 and SCRID6 is not equal to 8 and SCRID6 is not equal to 9 then READ: "Check ID." and skip to Q6.**

- |     |                                                       |   |           |
|-----|-------------------------------------------------------|---|-----------|
| Q8. | Interview Location ( <b>Choose one</b> ) (Choose one) | 1 | Tijuana   |
|     |                                                       | 2 | San Diego |
|     |                                                       | 3 | Other     |

**If Q8 is equal to 3 then skip to Q9**

**If not, then skip to instruction before Q11.**

Q9. Specify the Interview Location (i.e. name of city).

-----

Q10. Specify the Interview Place in [Response to Q9].

-----  
-----  
-----

**If Q8 is equal to 1 then skip to Q11**

**If not, then skip to instruction before Q13.**



- Q11. Interview Place in Tijuana. **(Choose one)** (Choose one)
- |   |                                |
|---|--------------------------------|
| 1 | Tijuana 1 Zone Norte - El Mapa |
| 2 | Tijuana 2 Coahuila Office      |
| 3 | Tijuana 3                      |
| 4 | Rehab                          |
| 5 | Jail                           |
| 6 | Other                          |

*If Q11 is equal to 6 then skip to Q12*

*If not, then skip to instruction before Q13.*

Q12. Specify the Interview Place in Tijuana.

-----  
-----  
-----

*If Q8 is equal to 2 then skip to Q13*

*If not, then skip to Q15.*

- Q13. Interview Place in San Diego. **(Choose one)** (Choose one)
- |   |             |
|---|-------------|
| 1 | San Diego 1 |
| 2 | San Diego 2 |
| 3 | San Diego 3 |
| 4 | Rehab       |
| 5 | Jail        |
| 6 | Other       |

*If Q13 is equal to 6 then skip to Q14*

*If not, then skip to Q15.*

Q14. Specify the Interview Place in San Diego.

-----  
-----  
-----

- Q15. In what country do you live? (**Choose one**) (Choose one)
- |   |                  |
|---|------------------|
| 1 | United States    |
| 2 | Mexico           |
| 3 | Other            |
| 8 | Refuse to Answer |

*If Q15 is equal to 3 then skip to Q16*

*If not, then skip to instruction before Q17.*

Q16. Specify the country in which you live.

-----  
-----  
-----

*If Q15 is equal to 1 then skip to Q17*

*If not, then skip to instruction before Q19.*

Q17. In what region of San Diego County do you live? **(Choose one)** (Choose one)

- 1 City of San Diego
- 2 East County
- 3 North County Coastal
- 4 North County Inland
- 5 South Bay
- 6 Other San Diego region
- 7 I do not live in San Diego County
- 8 Refuse to Answer

***If Q17 is not equal to 6, then skip to instruction before Q19.***

Q18. Please specify what region you live in.

-----  
-----  
-----  
-----  
-----

***If Q15 is equal to 2 then skip to Q19***

***If not, then skip to instruction before Q21.***

Q19. What city do you live in? (Choose one) (Choose one)

- 1 Tijuana
- 2 Mexicali
- 3 Ensenada
- 4 Rosarito
- 5 Other
- 8 Refuse to Answer

***If Q19 is not equal to 5, then skip to instruction before Q21.***

Q20. Please specify the name of the city where you reside.

-----  
-----  
-----  
-----  
-----

***If Q15 is equal to 1 then skip to instruction before Q21***

***If not, then skip to instruction before Q25.***

***If Q8 is equal to 2 then skip to Q21***

***If not, then skip to Q22.***

|                                    |   |                  |
|------------------------------------|---|------------------|
| Q21. Have you ever been to Mexico? | 1 | Yes              |
|                                    | 0 | No               |
|                                    | 8 | Refuse to Answer |

***If Q21 is not equal to 1, then skip to instruction before Q25.***

|                                              |   |                  |
|----------------------------------------------|---|------------------|
| Q22. Have you ever used any drugs in Mexico? | 1 | Yes              |
|                                              | 0 | No               |
|                                              | 8 | Refuse to Answer |

***If Q22 is not equal to 1, then skip to instruction before Q24.***

|                                              |   |                  |
|----------------------------------------------|---|------------------|
| Q23. Have you ever injected drugs in Mexico? | 1 | Yes              |
|                                              | 0 | No               |
|                                              | 8 | Refuse to Answer |

***If Q23 is not equal to 1, then skip to instruction before Q25.***

Q24. When was the last time you injected drugs in Mexico?

\_\_\_/\_\_\_/\_\_\_\_\_ mm / dd / yyyy

2098 Refuse to Answer (Year)

***If Q24 is not equal to 2098 and Q24 is not equal to "skipped" then skip to instruction before Q25***

***If not, then skip to instruction before Q25.***

***INJTMEX = TODAY - Q24***

***If Q8 is equal to 1 and Q15 is equal to 2 then skip to Q25***

***If not, then skip to instruction before Q29.***

Q25. Have you ever been to the United States?

1 Yes

0 No

8 Refuse to Answer

***If Q25 is not equal to 1, then skip to instruction before Q29.***

Q26. Have you ever used any drugs in the US?

1 Yes

0 No

8 Refuse to Answer

***If Q26 is not equal to 1, then skip to instruction before Q28.***

Q27. Have you ever injected drugs in the US?

1 Yes

0 No

8 Refuse to Answer

***If Q27 is not equal to 1, then skip to instruction before Q29.***

Q28. When was the last time you injected drugs in the US?

\_\_\_ / \_\_\_ / \_\_\_\_\_ mm / dd / yyyy

2098 Refuse to Answer (Year)

*If Q28 is not equal to 2098 and Q28 is not equal to "skipped" then skip to instruction before Q29*

*If not, then skip to instruction before Q29.*

*INJTUS = TODAY - Q28*

*NDT\_SD = If(Q8 is equal to 2 and (Q17 is equal to 1 or Q17 is equal to 2 or Q17 is equal to 3 or Q17 is equal to 4 or Q17 is equal to 5 or Q17 is equal to 6) and (Q21 is equal to 0 or Q22 is equal to 0), 1, 0)*

*NDT\_TJ = If(Q8 is equal to 1 and Q19 is equal to 1 and (Q25 is equal to 0 or Q26 is equal to 0), 1, 0)*

*DT\_SD = If(NDT\_SD is equal to 0 and NDT\_TJ is equal to 0, 1, 0)*

**READ: INTERVIEWER, PLEASE READ THE FOLLOWING TEXT ALOUD TO THE RESPONDENT:**  
*This supplemental interview is part of the research study about HIV/HCV, SARSCoV-2 and overdose among people who inject drugs in San Diego and Tijuana. The questions we will be asking complement the questions we asked you during your first visit and are related to some basic information about you, your SARSCoV-2 and TB health, your friends and people you know and utilization of health and other services, and your attitudes towards some of these issues. I know some of the questions we will ask may be a little uncomfortable for you to answer. I want to remind you like in your first visit, this interview is confidential, and we will not give any of your personal information to anyone outside of this project. Nothing that you tell us can be traced back to you as an individual. It is important that you know that your participation in this interview is entirely voluntary. You do not need to answer a question if you do not want to, and you may stop the interview at any point. Do you have any questions before we begin?*

Q29. What is your date of birth?

\_\_\_ / \_\_\_ / \_\_\_\_\_ mm / dd / yyyy

2098 Refuse to Answer (Year)

*AGE = Age(Q29, TODAY)*

- Q30. What sex was listed on your birth certificate? (Choose one) (Choose one)
- 1 Male
  - 2 Female
  - 3 Intersex
  - 8 Refuse to Answer

## WATER

**READ: READ TO THE RESPONDENT: Now I am going to ask some questions about your use and access to water in your daily life.**

Q31. Over the past 6 months, which one of these sources of drinking water you used? **Interviewer: show images of water sources and select all that apply.** (Check all that apply)

- Private Tap (piped to your household)
- Private tap (piped to a neighbor, family member, friend)
- Public tap (park/gas station/outside store)
- Irrigation water (public parks)
- Unprotected well
- Protected well
- Unprotected spring
- Protected spring
- Rainwater
- Delivered water (truck)
- Packaged (bottled/sachet/water dispenser)
- Surface water (river/lake/canal)
- Tubes/holes inside the Tijuana river canal (Iloraderos)
- No water sources
- Other
- Refuse to Answer

**If Q31N is equal to 1 and Q31 is not equal to 98 and Q31 is greater than 1 then READ: "You can only choose the response "No water sources" by itself. Please check responses." and skip to Q31.**

**If Q31O is equal to 1 then skip to Q32**

**If not, then skip to Q33.**



Q32. You said that you had access to other water sources in the past 6 months. Please specify.

-----  
 -----  
 -----

Q33. What is your main source for drinking water (most common)? **Interviewer: show images of water sources and select only one.** (Choose one)

- 01 Private tap (piped to your household)
- 02 Private tap (piped to a neighbor, family member, friend)
- 03 Public tap (park/gas station/outside store)
- 04 Irrigation water (public parks)
- 05 Unprotected well
- 06 Protected well
- 07 Unprotected spring
- 08 Protected spring
- 09 Rainwater
- 10 Delivered water (truck)
- 11 Packaged (bottled/sachet/water dispenser)
- 12 Surface water (river/lake/canal)
- 13 Tubes/holes inside the Tijuana river canal (Iloraderos)
- 14 No water sources
- 15 Other
- 98 Refuse to Answer

*If Q33 is equal to 15 then skip to Q34*

*If not, then skip to Q35.*

Q34. Please specify your main source for drinking water.

-----  
 -----  
 -----

Q35. Is this main source of drinking water always available to you? (Choose one) (Choose one)

- 1 Yes, always available
- 2 Most of the time
- 3 Some of the time
- 4 No, water is rarely available
- 8 Refuse to Answer

Q36. How long does it take you to secure drinking water from your main drinking water source (go there, get water, and come back)? **Interviewer, if the respondent indicates that water is always available, enter 0.**

- \_\_\_\_ HOURS
- \_\_\_\_ MINUTES
- 998 Refuse to Answer (Minutes)

Q37. Since the COVID-19 epidemic started in March 2020, did water availability change for you? (Choose one) (Choose one)

- 0 No, it is the same
- 1 Yes, it got worse
- 2 Yes, it improved
- 8 Refuse to Answer

Q38. In the last week, what was your main (most common) beverage when you felt thirsty? (Choose one)

- 01 Regular Water
- 02 Sparkling Water
- 03 Milk
- 04 Coffee
- 05 Tea
- 06 Juice/sweetened flavored drink
- 07 Soda
- 08 Alcoholic beverages
- 09 None
- 10 Other
- 98 Refuse to Answer

*If Q38 is equal to 10 then skip to Q39*

*If not, then skip to Q40.*

Q39. Please specify your main beverage.

-----  
 -----  
 -----

Q40. In the last week, how often did you feel thirsty and were without water? (Choose one) (Choose one)

- 1 Multiple times per day
- 2 Daily
- 3 Multiple times in the week
- 4 Once
- 5 Never
- 8 Refuse to Answer

Q41. In the last week, how many glasses of water did you drink per day? (Choose one) (Choose one)

- 01 1 glass=250 ml/8 oz
- 02 2 glasses=500 ml/16 oz
- 03 3 glasses=750 ml/24 oz
- 04 4 glasses=1 ltr/32 oz
- 05 5 glasses=1.25 ltr/40 oz
- 06 6 glasses=1.5 ltr/48 oz
- 07 7 glasses=1.75 ltr/52oz
- 08 8 glasses=2 ltr/64 oz
- 09 9 glasses=2.25 ltr/72 oz
- 10 More than 9 glasses per day
- 98 Refuse to Answer

*If Q41 is equal to 10 then skip to Q42*

*If not, then skip to Q43.*

Q42. Please specify how many glasses of water did you drink per day?    \_\_\_ glasses  
 98 Refuse to Answer

Q43. In the last week, how much money did you spend on drinking water? **Interviewer, please enter the amount and on the next screen you'll be prompted to enter the currency.**

\_\_\_\_\_ 99998 Refuse to Answer

*If Q43 is not equal to 99998 and Q43 is not equal to 0 then skip to Q44*

*If not, then skip to Q45.*

Q44. Interviewer, please enter the **currency.** (Choose one)    1 US Dollars  
 2 Mexican Pesos  
 8 Refuse to Answer

Q45. Over the past 6 months, what water sources did you use for handwashing? **Interviewer: show images of water sources and select all that apply.** (Check all that apply)

- Private tap (piped to your household)
- Private tap (piped to a neighbor, family member, friend)
- Public tap (park/gas station/outside store)
- Irrigation water (public parks)
- Unprotected well
- Protected well
- Unprotected spring
- Protected spring
- Rainwater
- Delivered water (truck)
- Packaged (bottled/sachet/water dispenser)
- Surface water (river/lake/canal)
- Tubes/holes inside the Tijuana river canal (Iloraderos)
- No water sources
- Other
- Refuse to Answer

***If Q45N is equal to 1 and Q45 is not equal to 98 and Q45 is greater than 1 then READ: "You can only choose the response "No water sources" by itself. Please check responses." and skip to Q45.***

***If Q45O is equal to 1 then skip to Q46***

***If not, then skip to Q47.***

Q46. You said that you use another source of water for handwashing. Please specify.

-----  
 -----  
 -----

Q47. What is your main source of water for handwashing (most common)? **Interviewer: read out loud to the respondent and select only one** (Choose one)

- 01 Private tap (piped to your household)
- 02 Private tap (piped to a neighbor, family member, friend)
- 03 Public tap (park/gas station/outside store)
- 04 Irrigation water (public parks)
- 05 Unprotected well
- 06 Protected well
- 07 Unprotected spring
- 08 Protected spring
- 09 Rainwater
- 10 Delivered water (truck)
- 11 Packaged (bottled/sachet/water dispenser)
- 12 Surface water (river/lake/canal)
- 13 Tubes/holes inside the Tijuana river canal (Iloraderos)
- 14 No water sources
- 15 Other
- 98 Refuse to Answer

*If Q47 is equal to 15 then skip to Q48*

*If not, then skip to Q49.*

Q48. Please specify your main source of water for handwashing.

-----  
 -----  
 -----

Q49. How often is this main source for handwashing available to you? (Choose one)

- 1 Always
- 2 Usually
- 3 Sometimes
- 4 Rarely
- 5 Never
- 8 Refuse to Answer

Q50. How often is soap available to you? (Choose one)

- 1 Always
- 2 Usually
- 3 Sometimes
- 4 Rarely
- 5 Never
- 8 Refuse to Answer

Q51. How often are you able to wash your hands with soap and water on an average day? (Choose one)

- 1 Always
- 2 Usually
- 3 Sometimes
- 4 Rarely
- 5 Never
- 8 Refuse to Answer

Q52. Since the COVID-19 epidemic started, did soap availability change for you? (Choose one)

- 0 No, it is the same
- 1 Yes, it got worse
- 2 Yes, it improved
- 8 Refuse to Answer

Q53. How often is alcohol-based hand rub available to you? (Choose one)

- 1 Always
- 2 Usually
- 3 Sometimes
- 4 Rarely
- 5 Never
- 8 Refuse to Answer

Q54. In the last week, how often did you wash your hands (with soap and water) after a bowel movement? (Choose one)

- 1 Always
- 2 Usually
- 3 Sometimes
- 4 Rarely
- 5 Never
- 8 Refuse to Answer



Q55. In the last week, how often did you wash your hands (soap and water) before eating? (Choose one)

- 1 Always
- 2 Usually
- 3 Sometimes
- 4 Rarely
- 5 Never
- 8 Refuse to Answer

Q56. In the last week, how often did you wash your hands (soap and water) before preparing food? (Choose one)

- 1 Always
- 2 Usually
- 3 Sometimes
- 4 Rarely
- 5 Never
- 8 Refuse to Answer

Q57. What is your main source of water for bathing (most common)? **Interviewer: show images of water sources and select only one.** (Choose one)

- 01 Private tap (piped to your household)
- 02 Private tap (piped to a neighbor, family member, friend)
- 03 Public tap (park/gas station/outside store)
- 04 Irrigation water (public parks)
- 05 Unprotected well
- 06 Protected well
- 07 Unprotected spring
- 08 Protected spring
- 09 Rainwater
- 10 Delivered water (truck)
- 11 Packaged (bottled/sachet/water dispenser)
- 12 Surface water (river/lake/canal)
- 13 Tubes/holes inside the Tijuana river canal (Iloraderos)
- 14 No water sources
- 15 Other
- 98 Refuse to Answer

*If Q57 is equal to 15 then skip to Q58*

*If not, then skip to Q59.*

Q58. Please specify your main source of water for bathing.

-----  
 -----  
 -----

Q59. In the last week, how many times did you shower/bathe?      \_\_\_  times

98      Refuse to Answer

Q60. What is your main water source for cleaning wounds/abscesses? **Interviewer: show images of water sources.** (Choose one) (Choose one)

- 01 Private tap (piped to your household)
- 02 Private tap (piped to a neighbor, family member, friend)
- 03 Public tap (park/gas station/outside store)
- 04 Irrigation water (public parks)
- 05 Unprotected well
- 06 Protected well
- 07 Unprotected spring
- 08 Protected spring
- 09 Rainwater
- 10 Delivered water (truck)
- 11 Packaged (bottled/sachet/water dispenser)
- 12 Surface water (river/lake/canal)
- 13 Tubes/holes inside the Tijuana river canal (Iloraderos)
- 14 No water sources
- 15 Other
- 98 Refuse to Answer

*If Q60 is equal to 15 then skip to Q61*

*If not, then skip to Q62.*

Q61. You said that you use another main source of water for cleaning wounds/abscesses. Please specify.

-----  
 -----  
 -----

Q62. What is your main water source for preparing drugs for injection? **Interviewer: show images of water sources and select one** (Choose one) (Choose one)

- 01 Private tap (piped to your household)
- 02 Private tap (piped to a neighbor, family member, friend)
- 03 Public tap (park/gas station/outside store)
- 04 Irrigation water (public parks)
- 05 Unprotected well
- 06 Protected well
- 07 Unprotected spring
- 08 Protected spring
- 09 Rainwater
- 10 Delivered water (truck)
- 11 Packaged (bottled/sachet/water dispenser)
- 12 Surface water (river/lake/canal)
- 13 Tubes/holes inside the Tijuana river canal (Iloraderos)
- 14 No water sources
- 15 Other
- 98 Refuse to Answer

*If Q62 is equal to 15 then skip to Q63*

*If not, then skip to Q64.*

Q63. You said that you use another main source of water for preparing drugs for injection. Please specify.

-----

-----

-----

Q64. In the last week, how much money did you spend on personal hygiene (soap and water for hygiene, bathing costs, laundry costs, menstrual hygiene)? **Interviewer, please enter the amount and on the next screen you'll be prompted to enter the currency.**

\_\_\_\_\_  
 99998 Refuse to Answer

*If Q64 is not equal to 99998 and Q64 is not equal to 0 then skip to Q65*

*If not, then skip to instruction before Q66.*

Q65. Interviewer, please enter the **currency**. (Choose one)

|   |                  |
|---|------------------|
| 1 | US Dollars       |
| 2 | Mexican Pesos    |
| 8 | Refuse to Answer |

*If Q30 is equal to 2 or Q30 is equal to 3 then skip to Q66*

*If not, then skip to instruction before Q67.*

Q66. Have you ever had menstrual periods?

|   |                  |
|---|------------------|
| 1 | Yes              |
| 0 | No               |
| 8 | Refuse to Answer |

*If Q66 is equal to 1 then skip to Q67*

*If not, then skip to instruction before Q69.*

Q67. When (how long ago) was your last menstrual period? Interviewer, if the participant says that they are currently on their period, enter 0 in the "days" field.

|       |                           |
|-------|---------------------------|
| _____ | YEARS                     |
| _____ | MONTHS                    |
| _____ | DAYS                      |
| 997   | Don't Know (Months)       |
| 998   | Refuse to Answer (Months) |

Q68. During your last menstrual period, which hygiene materials did you use? **Interviewer, check all that apply.** (Check all that apply)

- Cloth
- Reusable sanitary pads
- Disposable sanitary pads
- Tampons
- Menstrual cup
- Toilet paper
- Underwear alone
- Nothing
- Other
- N/A (I don't have a period)
- Refuse to Answer

*If Q68I is equal to 1 then skip to Q69*

*If not, then skip to Q70.*

Q69. Please specify which hygiene materials you used during your last menstrual period.

-----  
 -----  
 -----

Q70. In the last 6 months, what kind of toilet did you use? **Interviewer, check all that apply.** (Check all that apply)

- Flush/Pour-flush
- Pit latrine with slab
- Pit latrine without slab/open pit
- Composting toilet
- Container based sanitation
- Bucket
- Hanging toilet/latrine
- No facility (open defecation)
- Other
- Refuse to Answer

***If Q70I is equal to 1 then skip to Q71***

***If not, then skip to Q72.***

Q71. Please specify what kind of toilet did you use in the past 6 months.

-----

-----

-----

Q72. What kind of toilet do you use most commonly? (Choose one)

- 01 Flush/Pour-flush
- 02 Pit latrine with slab
- 03 Pit latrine without slab/open pit
- 04 Composting toilet
- 05 Container based sanitation
- 06 Bucket
- 07 Hanging toilet/latrine
- 08 No facility (open defecation)
- 09 Other
- 98 Refuse to Answer

***If Q72 is equal to 9 then skip to Q73***

***If not, then skip to Q74.***

Q73. Please specify what kind of toilet you use most commonly.

-----  
 -----  
 -----

Q74. Is this main toilet shared with members of other households that you know or the general public?  
(Choose one)

- 1 Shared with more than one household that I know
- 2 General public
- 3 Not shared
- 8 Refuse to Answer
- 9 Not Applicable



Q75. How often is this main toilet available (open and not locked)? (Choose one)

- 1 Always
- 2 Usually
- 3 Sometimes
- 4 Rarely
- 5 Never
- 8 Refuse to Answer
- 9 Not Applicable

Q76. How often is this main toilet functional? (Choose one)

- 1 Always
- 2 Usually
- 3 Sometimes
- 4 Rarely
- 5 Never
- 8 Refuse to Answer
- 9 Not Applicable

Q77. How often is this main toilet private? (Choose one)

- 1 Always
- 2 Usually
- 3 Sometimes
- 4 Rarely
- 5 Never
- 8 Refuse to Answer
- 9 Not Applicable

Q78. How long does it take to walk to the main toilet sanitation type? **Interviewer, if the respondent indicates that they don't have to walk to the main sanitation facility, enter 0.**

- \_\_\_ HOURS
- \_\_\_ MINUTES
- 998 Refuse to Answer (Minutes)
- 999 Not Applicable (Minutes)

Q79. Have you experienced harassment or violence when using the toilet?

- 1 Yes
- 0 No
- 8 Refuse to Answer
- 9 Not Applicable

*If Q79 is equal to 1 then skip to Q80*

*If not, then skip to instruction before Q81.*

Q80. What types of harassment or violence have you had when using the toilet? **Interviewer, select all that apply.** (Check all that apply)

- \_\_\_ physical assault
- \_\_\_ sexual assault
- \_\_\_ verbal assault
- \_\_\_ robbery
- \_\_\_ arrest
- \_\_\_ other type of harassment/violence
- \_\_\_ Refuse to Answer
- \_\_\_ Not Applicable

*If Q80F is equal to 1 then skip to Q81*

*If not, then skip to Q82.*



**SARSCoV-2 COMPONENT: General Impact**

**READ: READ TO THE RESPONDENT: COVID-19 is a new disease, caused by a novel (or new) coronavirus that has not previously been seen in humans. I'm going to ask you questions about signs or symptoms you might have experienced in the last two weeks. We will also ask you questions about your daily activities, employment and adjusting to the current situation.**

**READ: READ TO THE RESPONDENT: Now we are going to ask you some questions about how COVID-19 and changes in your community has affected your life and your health.**

Q85. What are you doing/did you do during the COVID-19 pandemic to protect yourself or other people?  
**Interviewer: Read the options out loud to the respondent and select all that apply. (Check all that apply)**

- Prac
- Isola
- Carri
- Wor
- Not
- Foll
- Char
- Incre
- Cov
- Avo
- No c
- Refu

**If Q85L is equal to 1 and Q85 is greater than 1 then READ: ""No changes to my life or behavior" cannot be selected in conjunction with other options. You are redirected to make corrections." and skip to Q85.**

Q86. How much is/did the COVID-19 pandemic impact your day-to-day life? (Choose one)

- 1 Not at all
- 2 A little
- 3 Much
- 4 Very Much
- 5 Extremely
- 8 Refuse to Answer

Q87. In the last 2 weeks, because of the COVID-19 pandemic, I have:  
**Interviewer read out and select all that apply. If none of the options apply, move on to the next screen.** (Check all that apply)

- Stocked up on alcohol
- Stocked up on illicit drugs
- Stocked up on harm reduction supplies (clean needles, works)
- Avoided sharing cigarettes, joints or e-cigarettes/vapes (more than usual)
- Avoided sharing crack pipes, meth pipes or bongs (more than usual)
- Avoid sharing drinks with others (more than usual)
- Avoided shelters
- Avoided needle exchange sites
- Avoided picking up methadone or buprenorphine
- Avoided picking up other medications
- Avoided healthcare (e.g., clinical care appointments, hospitals, health clinics)
- Stopped smoking
- Accessed treatments for alcohol use disorder
- Other
- Refuse to Answer

**If Q87N is equal to 1 then skip to Q88**

**If not, then skip to Q89.**

Q88. Please specify what else you have done in the last 2 weeks because of the COVID-19 pandemic.

-----  
-----

Q89. Has your access to food been impacted in the last 2 weeks? (Check all that apply)

- No,
- Yes,
- Yes,
- Yes,
- Yes,
- Refu

**If Q89A is equal to 1 and Q89 is greater than 1 then READ: "You selected the "No" option and also an "Yes" option. Please go back and revise the answer." and skip to Q89.**

**If Q89F is equal to 1 then skip to Q90**

**If not, then skip to instruction before Q91.**

Q90. Please specify how else has your access to food has been impacted.

-----  
-----  
-----

**SARSCoV-2 COMPONENT: Food Insecurity from USDA Adult Food Insecurity Survey**

**READ: READ TO THE RESPONDENT: Now I'm going to read you several statements that people have made about their food situation. For these statements, please tell me whether the statement was often true, sometimes true, or never true for (you/your household), since the COVID epidemic began in March 2020.**

Q91. The first statement is: I worried whether (my/our) food would run out before I got money to buy more. Was that often true, sometimes true, or never true for you since the COVID epidemic began in March 2020? (Choose one)

- 1 Often true
- 2 Sometimes true
- 3 Never true
- 8 Refuse to Answer

Q92. The food that I bought just didn't last, and I didn't have money to get more. (Choose one)

- 1 Often true
- 2 Sometimes true
- 3 Never true
- 8 Refuse to Answer

Q93. I couldn't afford to eat balanced meals. (Choose one)

- 1 Often true
- 2 Sometimes true
- 3 Never true
- 8 Refuse to Answer

Q94. Since the COVID epidemic began in March 2020, did you ever cut the size of your meals or skip meals because there wasn't enough money for food?

- 1 Yes
- 0 No
- 8 Refuse to Answer

***If Q94 is equal to 1 then skip to Q95***

**If not, then skip to Q96.**

- Q95. How often did this happen? (Choose one)
- |   |                                 |
|---|---------------------------------|
| 1 | Almost every month              |
| 2 | Some months but not every month |
| 3 | Only 1 or 2 months              |
| 8 | Refuse to Answer                |

Q96. Since the COVID epidemic began in March 2020, did you ever eat less than you felt you should because there wasn't enough money for food?

- |   |                  |
|---|------------------|
| 1 | Yes              |
| 0 | No               |
| 8 | Refuse to Answer |

Q97. Since the COVID epidemic began in March 2020, were you ever hungry but didn't eat because there wasn't enough money for food?

- |   |                  |
|---|------------------|
| 1 | Yes              |
| 0 | No               |
| 8 | Refuse to Answer |

Q98. Since the COVID epidemic began in March 2020, did you lose weight because there wasn't enough money for food?

- |   |                  |
|---|------------------|
| 1 | Yes              |
| 0 | No               |
| 8 | Refuse to Answer |

Q99. Since the COVID epidemic began in March 2020, did you ever not eat for a whole day because there wasn't enough money for food?

- |   |                  |
|---|------------------|
| 1 | Yes              |
| 0 | No               |
| 8 | Refuse to Answer |

**If Q99 is equal to 1 then skip to Q100**



***If not, then skip to Q101.***

- Q100. How often did this happen? (Choose one)
- |   |                                 |
|---|---------------------------------|
| 1 | Almost every month              |
| 2 | Some months but not every month |
| 3 | Only 1 or 2 months              |
| 8 | Refuse to Answer                |

Q101. Do you follow a special diet (e.g. low cholesterol, vegan, vegetarian, paleo, weight loss, organic, etc.)?

- |   |                  |
|---|------------------|
| 1 | Yes              |
| 0 | No               |
| 8 | Refuse to Answer |

***If Q101 is equal to 1 then skip to Q102***

***If not, then skip to Q103.***

Q102. Please, specify a diet.

-----

Q103. Do you have any of the following chronic conditions?

**Interviewer, read the options to the respondent and check all that apply. If none apply, don't check anything and move on to the next screen. (Check all that apply)**

- Seasonal allergies
- Asthma or other lung problems
- Heart problems
- Kidney problems
- Immune disorder
- Diabetes or high blood sugar
- Cancer
- Arthritis
- Frequent or very bad headaches
- Epilepsy or seizures
- Serious stomach or bowel problems
- Serious acne or skin problems
- Hypertension
- Chronic Obstructive Pulmonary Disease (COPD)
- Congestive Heart Failure
- Atrial Fibrillation or Atrial Flutter
- Heart disease / Myocardial infarction
- Stroke
- Any autoimmune disease
- HIV
- Deep vein thrombosis
- Pulmonary embolism

\_\_\_ Refuse to Answer

- Q104. Have you used antibiotics in past 6 months?
- |   |                  |
|---|------------------|
| 1 | Yes              |
| 0 | No               |
| 8 | Refuse to Answer |

***If Q104 is equal to 1 then skip to Q105***

***If not, then skip to Q106.***

- Q105. Please, specify what condition were you taking antibiotics for?

-----

- Q106. Have you been exposed to someone likely to have Coronavirus/COVID-19? (Check all that apply)

- \_\_\_ Yes, someone with positive test
- \_\_\_ Yes, someone with medical diagnosis, but no test
- \_\_\_ Yes, someone with possible symptoms, but no diagnosis by doctor
- \_\_\_ No
- \_\_\_ Refuse to Answer

***If Q106D is equal to 1 and Q106A + Q106B + Q106C is greater than 0 then READ: "You can only choose the response "No" by itself. Please check responses." and skip to Q106.***

**COVID-19 KNOWLEDGE**

Q107. Where do you get information about COVID19/the coronavirus? **(Interviewer: check all that apply and if none apply, move on to the next screen)** (Check all that apply)

- Friends
- Doctors/health professionals
- Conservative TV/radio (e.g. Fox, One America Network, Drudge Report)
- Liberal TV/radio (e.g. CNN, MSNBC, Huffington Post, NPR)
- Social Media (e.g., Facebook, YouTube, Twitter)
- Refuse to Answer

Q108. Which of these sources of COVID19 information is most important to you? (Choose one)

- 1 Friends
- 2 Doctors/health professionals
- 3 Conservative TV/radio (e.g. Fox, One America Network, Drudge Report)
- 4 Liberal TV/radio (e.g., CNN, MSNBC, Huffington Post, NPR)
- 5 Social Media (e.g., Facebook, YouTube, Twitter)
- 8 Refuse to Answer

**READ: Im going to read a few statements about COVID-19. Please tell me if you think each statement is true, false or if you are unsure.**

Q109. The pharmaceutical industry created the COVID-19 virus. (Choose one)

- 1 True
- 2 False
- 3 Unsure
- 8 Refuse to Answer

Q110. The coronavirus was created by the Chinese government as a biological weapon. (Choose one)

- 1 True
- 2 False
- 3 Unsure
- 8 Refuse to Answer

Q111. Some people in the US government are exaggerating the danger posed by COVID19. (Choose one)

- 1 True
- 2 False
- 3 Unsure
- 8 Refuse to Answer

Q112. Vaccines given to children for diseases like measles and mumps cause autism. (Choose one)

- 1 True
- 2 False
- 3 Unsure
- 8 Refuse to Answer

Q113. The virus that causes COVID19 can be easily spread from one person to another. (Choose one)

- 1 True
- 2 False
- 3 Unsure
- 8 Refuse to Answer

Q114. Many thousands of people have died from COVID19. (Choose one)

- 1 True
- 2 False
- 3 Unsure
- 8 Refuse to Answer

- Q115. A vaccine is available to prevent COVID19. (Choose one)
- 1 True
  - 2 False
  - 3 Unsure
  - 8 Refuse to Answer
- Q116. Most people already have immunity to COVID19. (Choose one)
- 1 True
  - 2 False
  - 3 Unsure
  - 8 Refuse to Answer
- Q117. You can tell someone has COVID19 by looking at them. (Choose one)
- 1 True
  - 2 False
  - 3 Unsure
  - 8 Refuse to Answer
- Q118. There are effective treatments for COVID19 that can cure most people. (Choose one)
- 1 True
  - 2 False
  - 3 Unsure
  - 8 Refuse to Answer
- Q119. Having COVID19 is about as dangerous as having the flu. (Choose one)
- 1 True
  - 2 False
  - 3 Unsure
  - 8 Refuse to Answer

Q120. COVID vaccines being offered to people like me are not as safe as other COVID vaccines. (Choose one)

- 1 True
- 2 False
- 3 Unsure
- 8 Refuse to Answer

Q121. COVID vaccines include a tracking device. (Choose one)

- 1 True
- 2 False
- 3 Unsure
- 8 Refuse to Answer

Q122. COVID vaccines are safe for pregnant women. (Choose one)

- 1 True
- 2 False
- 3 Unsure
- 8 Refuse to Answer

Q123. Some COVID vaccines could change my DNA. (Choose one)

- 1 True
- 2 False
- 3 Unsure
- 8 Refuse to Answer

**COVID-19 TESTING AND VACCINATION**

Q124. If you were offered a free test for COVID today that would give you results in 20 minutes from a nose swab, would you want to get it done? (Choose one)

- 0 No
- 1 Yes
- 2 Unsure
- 7 Don't Know
- 8 Refuse to Answer

*If Q124 is equal to 1 and Q15 is equal to 1 then skip to Q125*

*If not, then skip to Q126.*

Q125. Would you still agree to this test if the San Diego government required that we report your results by name?

- 1 Yes
- 0 No
- 7 Don't Know
- 8 Refuse to Answer
- 9 Not Applicable

Q126. Do you think you've had COVID-19? (Choose one)

- 1 Yes
- 2 No
- 3 Unsure
- 8 Refuse to Answer



Q127. On a scale of 1 to 10, how worried are you about getting COVID-19 (or getting it again)? (Note: 1 being not worried at all, and 10 being extremely worried.) **Interviewer, please ask the question even if participant says they had COVID already or had the vaccine.**

- 01 Low
- 02
- 03
- 04
- 05
- 06
- 07
- 08
- 09
- 10 High
- 98 Refuse to Answer

*If Q126 is equal to 1 then skip to Q128*

*If not, then skip to Q129.*

- Q128. How long ago you think you had COVID-19?
- \_\_\_ MONTHS
  - \_\_\_ WEEKS
  - \_\_\_ DAYS
  - 98 Refuse to Answer (Months)

Q129. Have you been tested for COVID-19 (outside of our study)? (Choose one)

- 1 Yes, I received a test
- 2 No, I have not been tested
- 3 I tried to get tested but couldn't
- 4 I am not sure if I got tested for COVID-19
- 8 Refuse to Answer

***If Q129 is equal to 1 then skip to Q130***

***If not, then skip to Q158.***

Q130. How many times were you tested for COVID-19, outside of our study?

- \_\_\_ times
- 98 Refuse to Answer

Q131. In what country/countries were you tested for COVID-19, outside of our study? (**Interviewer, check all that apply**) (Check all that apply)

- \_\_\_ US
- \_\_\_ Mexico
- \_\_\_ Other country
- \_\_\_ Refuse to Answer

Q132. When you were tested for COVID-19 outside of our study, what kind of test was it? (**Check all that apply**) (Check all that apply)

- \_\_\_ Nasal swab test
- \_\_\_ Blood (antibody) test
- \_\_\_ Saliva
- \_\_\_ Another type of COVID test
- \_\_\_ Refuse to Answer

***If Q132D is equal to 1 then skip to Q133***

**If not, then skip to Q134.**

Q133. Please specify what type of COVID-19 test was it.

-----

Q134. Where did you get tested for COVID-19, outside of our study? (**Interviewer, read out list and check all that apply**) (Check all that apply)

- Doctor's office
- Community health clinic/Health fair
- Needle Exchange
- Research Study (other than our study)
- Self-tested with a rapid home test kit
- Other
- Refuse to Answer

**If Q134F is equal to 1 then skip to Q135**

**If not, then skip to Q136.**

Q135. Specify where you got tested for COVID-19.

-----

Q136. When was the LAST time you got tested for COVID-19 outside of our study?

- \_\_\_ / \_\_\_ / \_\_\_\_\_ mm / dd / yyyy
- 2097 Don't Know (Year)
  - 2098 Refuse to Answer (Year)

- Q137. Did you test positive for COVID-19? (Choose one)
- |   |                                          |
|---|------------------------------------------|
| 1 | Yes, I tested positive                   |
| 2 | No, I tested negative                    |
| 3 | I was tested, but did not get the result |
| 4 | Don't know/Didn't understand the result  |
| 8 | Refuse to Answer                         |

***If Q137 is equal to 1 then skip to Q138***

***If not, then skip to instruction before Q139.***

Q138. When did you test positive for COVID-19, outside of our study?

\_\_\_ / \_\_\_ / \_\_\_\_\_ mm / dd / yyyy

2097 Don't Know (Year)

2098 Refuse to Answer (Year)

***If Q126 is equal to 1 or Q137 is equal to 1 then skip to Q139***

***If not, then skip to Q158.***

Q139. When you had or you think you had COVID, which of the following symptoms did you have? (Check all that apply) (Check all that apply)

- Fever >100.4F (38C)
- Subjective fever (felt feverish, unconfirmed)
- Moderate fever or chills
- Night sweats (wet sheets more than or equal to 3 times per week)
- Repeated shaking with chills
- Runny nose
- Cough
- Sore throat
- Hoarseness
- Shortness of breath
- Nausea or vomiting
- Headache
- Abdominal pain
- Diarrhea (three or more loose/looser than normal stools in a 24 hr period)
- Sudden loss of smell
- Sudden loss of taste
- Joint pain
- Fatigue/extreme tiredness
- Refuse to Answer

***If Q139A is equal to 1 then skip to Q140***

***If not, then skip to instruction before Q141.***

- Q140. For how long have you had Fever >100.4F (38C)? (Choose one)
- |   |                   |
|---|-------------------|
| 1 | Less than 8 days  |
| 2 | 8-13 days         |
| 3 | 14-20 days        |
| 4 | More than 20 days |
| 7 | Don't Know        |
| 8 | Refuse to Answer  |

***If Q139B is equal to 1 then skip to Q141***

***If not, then skip to instruction before Q142.***

- Q141. For how long have you had Subjective fever? (Choose one)
- |   |                   |
|---|-------------------|
| 1 | Less than 8 days  |
| 2 | 8-13 days         |
| 3 | 14-20 days        |
| 4 | More than 20 days |
| 7 | Don't Know        |
| 8 | Refuse to Answer  |

***If Q139C is equal to 1 then skip to Q142***

***If not, then skip to instruction before Q143.***

- Q142. For how long have you had Moderate fever or chills? (Choose one)
- |   |                   |
|---|-------------------|
| 1 | Less than 8 days  |
| 2 | 8-13 days         |
| 3 | 14-20 days        |
| 4 | More than 20 days |
| 7 | Don't Know        |
| 8 | Refuse to Answer  |

***If Q139D is equal to 1 then skip to Q143***

***If not, then skip to instruction before Q144.***

- Q143. For how long have you had Night sweats? (Choose one)
- |   |                   |
|---|-------------------|
| 1 | Less than 8 days  |
| 2 | 8-13 days         |
| 3 | 14-20 days        |
| 4 | More than 20 days |
| 7 | Don't Know        |
| 8 | Refuse to Answer  |

*If Q139E is equal to 1 then skip to Q144*

*If not, then skip to instruction before Q145.*

- Q144. For how long have you had Repeated shaking with chills? (Choose one)
- |   |                   |
|---|-------------------|
| 1 | Less than 8 days  |
| 2 | 8-13 days         |
| 3 | 14-20 days        |
| 4 | More than 20 days |
| 7 | Don't Know        |
| 8 | Refuse to Answer  |

*If Q139F is equal to 1 then skip to Q145*

*If not, then skip to instruction before Q146.*

- Q145. For how long have you had Runny nose? (Choose one)
- |   |                   |
|---|-------------------|
| 1 | Less than 8 days  |
| 2 | 8-13 days         |
| 3 | 14-20 days        |
| 4 | More than 20 days |
| 7 | Don't Know        |
| 8 | Refuse to Answer  |

*If Q139G is equal to 1 then skip to Q146*

*If not, then skip to instruction before Q147.*

- Q146. For how long have you had Cough? (Choose one)
- |   |                   |
|---|-------------------|
| 1 | Less than 8 days  |
| 2 | 8-13 days         |
| 3 | 14-20 days        |
| 4 | More than 20 days |
| 7 | Don't Know        |
| 8 | Refuse to Answer  |

*If Q139H is equal to 1 then skip to Q147*

*If not, then skip to instruction before Q148.*

- Q147. For how long have you had Sore throat? (Choose one)
- |   |                   |
|---|-------------------|
| 1 | Less than 8 days  |
| 2 | 8-13 days         |
| 3 | 14-20 days        |
| 4 | More than 20 days |
| 7 | Don't Know        |
| 8 | Refuse to Answer  |

*If Q139I is equal to 1 then skip to Q148*

*If not, then skip to instruction before Q149.*

- Q148. For how long have you had Hoarseness? (Choose one)
- |   |                   |
|---|-------------------|
| 1 | Less than 8 days  |
| 2 | 8-13 days         |
| 3 | 14-20 days        |
| 4 | More than 20 days |
| 7 | Don't Know        |
| 8 | Refuse to Answer  |

*If Q139J is equal to 1 then skip to Q149*

*If not, then skip to instruction before Q150.*



- Q149. For how long have you had Shortness of breath? (Choose one)
- |   |                   |
|---|-------------------|
| 1 | Less than 8 days  |
| 2 | 8-13 days         |
| 3 | 14-20 days        |
| 4 | More than 20 days |
| 7 | Don't Know        |
| 8 | Refuse to Answer  |

***If Q139K is equal to 1 then skip to Q150***

***If not, then skip to instruction before Q151.***

- Q150. For how long have you had Nausea or vomiting? (Choose one)
- |   |                   |
|---|-------------------|
| 1 | Less than 8 days  |
| 2 | 8-13 days         |
| 3 | 14-20 days        |
| 4 | More than 20 days |
| 7 | Don't Know        |
| 8 | Refuse to Answer  |

***If Q139L is equal to 1 then skip to Q151***

***If not, then skip to instruction before Q152.***

- Q151. For how long have you had Headache? (Choose one)
- |   |                   |
|---|-------------------|
| 1 | Less than 8 days  |
| 2 | 8-13 days         |
| 3 | 14-20 days        |
| 4 | More than 20 days |
| 7 | Don't Know        |
| 8 | Refuse to Answer  |

***If Q139M is equal to 1 then skip to Q152***

***If not, then skip to instruction before Q153.***

- Q152. For how long have you had Abdominal pain? (Choose one)
- |   |                   |
|---|-------------------|
| 1 | Less than 8 days  |
| 2 | 8-13 days         |
| 3 | 14-20 days        |
| 4 | More than 20 days |
| 7 | Don't Know        |
| 8 | Refuse to Answer  |

*If Q139N is equal to 1 then skip to Q153*

*If not, then skip to instruction before Q154.*

- Q153. For how long have you had Diarrhea? (Choose one)
- |   |                   |
|---|-------------------|
| 1 | Less than 8 days  |
| 2 | 8-13 days         |
| 3 | 14-20 days        |
| 4 | More than 20 days |
| 7 | Don't Know        |
| 8 | Refuse to Answer  |

*If Q139O is equal to 1 then skip to Q154*

*If not, then skip to instruction before Q155.*

- Q154. For how long have you had Sudden loss of smell? (Choose one)
- |   |                   |
|---|-------------------|
| 1 | Less than 8 days  |
| 2 | 8-13 days         |
| 3 | 14-20 days        |
| 4 | More than 20 days |
| 7 | Don't Know        |
| 8 | Refuse to Answer  |

*If Q139P is equal to 1 then skip to Q155*

*If not, then skip to instruction before Q156.*

- Q155. For how long have you had Sudden loss of taste? (Choose one)
- |   |                   |
|---|-------------------|
| 1 | Less than 8 days  |
| 2 | 8-13 days         |
| 3 | 14-20 days        |
| 4 | More than 20 days |
| 7 | Don't Know        |
| 8 | Refuse to Answer  |

*If Q139Q is equal to 1 then skip to Q156*

*If not, then skip to instruction before Q157.*

- Q156. For how long have you had Joint pain? (Choose one)
- |   |                   |
|---|-------------------|
| 1 | Less than 8 days  |
| 2 | 8-13 days         |
| 3 | 14-20 days        |
| 4 | More than 20 days |
| 7 | Don't Know        |
| 8 | Refuse to Answer  |

*If Q139R is equal to 1 then skip to Q157*

*If not, then skip to Q158.*

- Q157. For how long have you had Fatigue/extreme tiredness? (Choose one)
- |   |                   |
|---|-------------------|
| 1 | Less than 8 days  |
| 2 | 8-13 days         |
| 3 | 14-20 days        |
| 4 | More than 20 days |
| 7 | Don't Know        |
| 8 | Refuse to Answer  |

- Q158. Have you been hospitalized due to COVID-19? (Choose one)
- |   |                               |
|---|-------------------------------|
| 0 | No                            |
| 1 | Yes, I have been hospitalized |
| 8 | Refuse to Answer              |

***If Q158 is equal to 1 then skip to Q159***

***If not, then skip to Q160.***

- Q159. When were you last hospitalized for COVID-19? \_\_\_ / \_\_\_ / \_\_\_\_\_ mm / dd / yyyy
- |      |                   |
|------|-------------------|
| 2097 | Don't Know (Year) |
|------|-------------------|

- Q160. How many people do you know who have died from COVID-19? \_\_\_\_\_ people
- |     |                  |
|-----|------------------|
| 998 | Refuse to Answer |
|-----|------------------|

- Q161. How many people do you know who have had a COVID19 vaccine?
- |       |                  |
|-------|------------------|
| _____ | people           |
| 9998  | Refuse to Answer |

- Q162. Have you ever received a flu vaccination?
- |   |                  |
|---|------------------|
| 1 | Yes              |
| 0 | No               |
| 7 | Don't Know       |
| 8 | Refuse to Answer |

- Q163. Have you been offered a COVID-19 vaccine? (Choose one)
- |   |                  |
|---|------------------|
| 1 | Yes              |
| 2 | No               |
| 3 | Unsure           |
| 8 | Refuse to Answer |

- Q164. Have you received a COVID-19 vaccine? (Choose one)
- |   |                  |
|---|------------------|
| 1 | Yes              |
| 2 | No               |
| 3 | Unsure           |
| 8 | Refuse to Answer |

***If Q164 is equal to 1 then skip to Q165***

***If not, then skip to instruction before Q172.***

Q165. In what country have you received the COVID-19 vaccine? (Choose one)

- |   |                  |
|---|------------------|
| 1 | US               |
| 2 | Mexico           |
| 3 | Other            |
| 8 | Refuse to Answer |

***If Q165 is equal to 3 then skip to Q166***

***If not, then skip to Q167.***

Q166. Specify the country where you received the COVID-19 vaccine.

-----

Q167. What type of COVID-19 vaccine did you get? (Choose one)

- |    |                     |
|----|---------------------|
| 01 | Moderna             |
| 02 | Pfizer              |
| 03 | Johnson and Johnson |
| 04 | Astrazeneca         |
| 05 | CanSino             |
| 06 | Sinovac             |
| 07 | Sputnik             |
| 08 | Other               |
| 97 | Don't Know          |
| 98 | Refuse to Answer    |

***If Q167 is equal to 8 then skip to Q168***

***If not, then skip to Q169.***

Q168. Specify the COVID-19 vaccine.

-----

- Q169. How many shots of the COVID-19 vaccine did you get? (Choose one)
- 1 One
  - 2 Two
  - 3 I forgot
  - 8 Refuse to Answer

Q170. When did you received the first shot of the COVID-19 vaccine?

- \_\_\_ / \_\_\_ / \_\_\_\_\_ mm / dd / yyyy
- 2097 Don't Know (Year)
  - 2098 Refuse to Answer (Year)

***If Q169 is equal to 2 then skip to Q171***

***If not, then skip to instruction before Q172.***

Q171. When did you received the second shot of the COVID-19 vaccine?

- \_\_\_ / \_\_\_ / \_\_\_\_\_ mm / dd / yyyy
- 2097 Don't Know (Year)
  - 2098 Refuse to Answer (Year)

***If Q164 is not equal to 1 then skip to Q172***

***If not, then skip to Q186.***

- Q172. Have you tried to get the COVID vaccine but could not get it?
- 1 Yes
  - 0 No
  - 8 Refuse to Answer

***If Q172 is equal to 1 then skip to Q173***

***If not, then skip to instruction before Q174.***

Q173. What problems have you had trying to get the COVID vaccine? (**Interviewer, read out list and check all that apply**) (Check all that apply)

- I dont know where to go
- Too far away/transportation issues
- I didnt have an appointment
- I dont have access to a computer or phone for making an appointment
- I dont like the place or the people at the places that are offering vaccine
- Line was too long
- The staff mistreated me/treated me badly
- I didnt meet the criteria (e.g., age, pre-existing condition)
- Dont have insurance/money
- Didnt have identification/ID
- Only CanSino, Sinovac, or Sputnik were offered
- Other
- Refuse to Answer

***If Q173L is equal to 1 then skip to Q174***

***If not, then skip to Q175.***

Q174. Specify what problems have you had trying to get the COVID vaccine?

-----

Q175. If you were offered a free vaccine available to prevent you from getting COVID 19 or getting it again, would you agree to get it? (Choose one)

- 1 Yes
- 2 No
- 3 Unsure
- 8 Refuse to Answer

***If Q175 is equal to 2 or Q175 is equal to 3 then skip to Q176***

***If not, then skip to Q186.***

Q176. Why would you not want to get a vaccine to prevent you from getting COVID (or from getting it again)?  
(Check all that apply)

- Don't like shots/needles
- I'm allergic to vaccines
- I'm not concerned about getting really sick from COVID19
- I don't think vaccines work really well
- I don't trust that the vaccine will be safe
- I don't believe that the COVID19 pandemic is as bad as some people say it is
- I don't want to pay for it
- I don't know enough about how a COVID19 vaccine works
- Worried I would get COVID19 from the vaccine
- I don't care about my health
- I'm going to get COVID anyway/fate
- Worried that I would test positive for COVID from the vaccine
- Takes too much time/too far
- I'm concerned about side effects from the vaccine/will make me sick
- I already had COVID and I don't think I can get it again
- I have a strong immune system/think I am immune
- I am taking vitamins and natural remedies to protect me from getting COVID
- I am afraid of getting it because I have pre-existing health conditions
- Other
- Refuse to Answer

***If Q176S is equal to 1 then skip to Q177***



**If not, then skip to Q178.**

Q177. Please specify why would you not want to get a vaccine to prevent you from getting COVID.

-----  
-----  
-----

Q178. Which of the following places would you be willing to go for a free COVID-19 vaccine? (**check all that apply**) (Check all that apply)

- Doctor's office
- Community health clinic
- Pharmacy
- Jail/Prison (if you were incarcerated)
- Needle exchange van
- Other mobile van
- Shelter
- Soup kitchen
- Drop-in center
- Church
- Health fair
- Other
- I would not be willing to go to any place
- Refuse to Answer

**If Q178M is equal to 1 and Q178 is greater than 1 then READ: "The "I would not be willing to go to any place" option may not be chosen in conjunction with other options. Please review and revise the answer." and skip to Q178.**

**If Q178L is equal to 1 then skip to Q179**

**If not, then skip to Q180.**

Q179. Please specify which place/places would you be willing to go to for a free COVID-19 vaccine?

-----  
-----  
-----

Q180. How much time would you be willing to take out of your day to get a free COVID-19 vaccine?  
(Choose one)

- 0 No amount of time (zero minutes)
- 1 Less than 1 hr
- 2 1-3 hours
- 3 Any amount of time
- 8 Refuse to Answer

Q181. Which of the following might make you more willing to get a free COVID vaccine? (Check all that apply)

- If it was only one shot instead of 2
- If I could inhale/swallow the vaccine
- If I could get it close by where I live/hang out
- If I could get it at a place I already go
- If my friends already got it
- If someone I trusted told me it was safe
- Other
- Nothing could convince me
- Refuse to Answer

***If Q181H is equal to 1 and Q181 is greater than 1 then READ: "The "Nothing could convince me" option may not be chosen in conjunction with other options. Please review and revise the answer." and skip to Q181.***

Q182. Would you be more or less willing to get a COVID vaccine if you received \$10? (Choose one)

- 1 More likely
- 2 Less likely
- 3 No difference
- 8 Refuse to Answer

Q183. Would you be more or less willing to get a COVID vaccine if you received \$25? (Choose one)

- 1 More likely
- 2 Less likely
- 3 No difference
- 8 Refuse to Answer

Q184. Would you be more or less willing to get a COVID vaccine if you received \$50? (Choose one)

- 1 More likely
- 2 Less likely
- 3 No difference
- 8 Refuse to Answer

Q185. Would you be more or less willing to get a COVID vaccine if you received \$100? (Choose one)

- 1 More likely
- 2 Less likely
- 3 No difference
- 8 Refuse to Answer

Q186. If you were to test positive for COVID-19, would you be able to isolate?

- 1 Yes
- 0 No
- 7 Don't Know
- 8 Refuse to Answer

Q187. If you were to be exposed to someone with COVID-19, would you be able to quarantine (i.e., separate yourself from other people for 10 days)?

- 1 Yes
- 0 No
- 7 Don't Know
- 8 Refuse to Answer

**READ: To what extent do you agree with the following two statements:**

Q188. I know where I can get COVID-19 testing in my community. (Choose one)

- 0 Strongly disagree
- 1 Disagree
- 2 Neither disagree or agree
- 3 Agree
- 4 Strongly agree
- 8 Refuse to Answer

Q189. It is easy to get tested for COVID-19. (Choose one)

- 0 Strongly disagree
- 1 Disagree
- 2 Neither disagree or agree
- 3 Agree
- 4 Strongly agree
- 8 Refuse to Answer

Q190. If I get a negative test result, it means...(Interviewer read the options to the respondent and check all that apply) (Check all that apply)

- I don't have to worry about getting COVID-19
- I don't have COVID-19 now
- I can be around others without giving the virus to them
- I can be around others without getting virus from them
- Refuse to Answer

**SARSCoV-2 Component (Health Questions)**

***READ: READ TO THE RESPONDENT: Now I would like to ask you some questions about your personal health. Remember that all the information you give me is private and will not be shared outside of the study. We will start with a series of signs and symptoms, I will ask you if you currently have it, if so, for how long you've had it.***

CURRENT SYMPTOMS ASSESSMENT

|                                                  |   |                  |
|--------------------------------------------------|---|------------------|
| Q191. Do you have: <b>Fever &gt;100.4F (38C)</b> | 1 | Yes              |
|                                                  | 0 | No               |
|                                                  | 7 | Don't Know       |
|                                                  | 8 | Refuse to Answer |

*If Q191 is equal to 1 then skip to Q192*

*If not, then skip to Q193.*

|                                                  |   |                   |
|--------------------------------------------------|---|-------------------|
| Q192. For how long have you had it? (Choose one) | 1 | Less than 8 days  |
|                                                  | 2 | 8-13 days         |
|                                                  | 3 | 14-20 days        |
|                                                  | 4 | More than 20 days |
|                                                  | 7 | Don't Know        |
|                                                  | 8 | Refuse to Answer  |

|                                                                          |   |                  |
|--------------------------------------------------------------------------|---|------------------|
| Q193. Do you have: <b>Subjective fever (felt feverish, unconfirmed)?</b> | 1 | Yes              |
|                                                                          | 0 | No               |
|                                                                          | 7 | Don't Know       |
|                                                                          | 8 | Refuse to Answer |

*If Q193 is equal to 1 then skip to Q194*

*If not, then skip to Q195.*

Q194. For how long have you had it? (Choose one)

- 1 Less than 8 days
- 2 8-13 days
- 3 14-20 days
- 4 More than 20 days
- 7 Don't Know
- 8 Refuse to Answer

Q195. Do you have: **Moderate fever or chills?**

- 1 Yes
- 0 No
- 7 Don't Know
- 8 Refuse to Answer

*If Q195 is equal to 1 then skip to Q196*

*If not, then skip to Q197.*

Q196. For how long have you had it? (Choose one)

- 1 Less than 8 days
- 2 8-13 days
- 3 14-20 days
- 4 More than 20 days
- 7 Don't Know
- 8 Refuse to Answer

Q197. Do you have: **Night sweats (wet sheets more than or equal to 3 times per week)?**

- 1 Yes
- 0 No
- 7 Don't Know
- 8 Refuse to Answer

*If Q197 is equal to 1 then skip to Q198*



***If not, then skip to Q199.***

- Q198. For how long have you had it? (Choose one)
- 1 Less than 8 days
  - 2 8-13 days
  - 3 14-20 days
  - 4 More than 20 days
  - 7 Don't Know
  - 8 Refuse to Answer

- Q199. Do you have: **Repeated shaking with chills?**
- 1 Yes
  - 0 No
  - 7 Don't Know
  - 8 Refuse to Answer

***If Q199 is equal to 1 then skip to Q200***

***If not, then skip to Q201.***

- Q200. For how long have you had it? (Choose one)
- 1 Less than 8 days
  - 2 8-13 days
  - 3 14-20 days
  - 4 More than 20 days
  - 7 Don't Know
  - 8 Refuse to Answer

- Q201. Do you have: **Runny nose**
- 1 Yes
  - 0 No
  - 7 Don't Know
  - 8 Refuse to Answer

***If Q201 is equal to 1 then skip to Q202***

***If not, then skip to Q203.***

- Q202. For how long have you had it? (Choose one)
- |   |                   |
|---|-------------------|
| 1 | Less than 8 days  |
| 2 | 8-13 days         |
| 3 | 14-20 days        |
| 4 | More than 20 days |
| 7 | Don't Know        |
| 8 | Refuse to Answer  |

- Q203. Do you have: **Cough?**
- |   |                  |
|---|------------------|
| 1 | Yes              |
| 0 | No               |
| 7 | Don't Know       |
| 8 | Refuse to Answer |

***If Q203 is equal to 1 then skip to Q204***

***If not, then skip to Q205.***

- Q204. For how long have you had it? (Choose one)
- |   |                   |
|---|-------------------|
| 1 | Less than 8 days  |
| 2 | 8-13 days         |
| 3 | 14-20 days        |
| 4 | More than 20 days |
| 7 | Don't Know        |
| 8 | Refuse to Answer  |

- Q205. Do you have: **Sore throat?**
- |   |                  |
|---|------------------|
| 1 | Yes              |
| 0 | No               |
| 7 | Don't Know       |
| 8 | Refuse to Answer |

***If Q205 is equal to 1 then skip to Q206***

***If not, then skip to Q207.***

Q206. For how long have you had it? (Choose one)

- 1 Less than 8 days
- 2 8-13 days
- 3 14-20 days
- 4 More than 20 days
- 7 Don't Know
- 8 Refuse to Answer

Q207. Do you have: **Hoarseness?**

- 1 Yes
- 0 No
- 7 Don't Know
- 8 Refuse to Answer

***If Q207 is equal to 1 then skip to Q208***

***If not, then skip to Q209.***

Q208. For how long have you had it? (Choose one)

- 1 Less than 8 days
- 2 8-13 days
- 3 14-20 days
- 4 More than 20 days
- 7 Don't Know
- 8 Refuse to Answer

Q209. Do you have: **Shortness of breath**

- 1 Yes
- 0 No
- 7 Don't Know
- 8 Refuse to Answer

*If Q209 is equal to 1 then skip to Q210*

*If not, then skip to Q211.*

Q210. For how long have you had it? (Choose one)

- 1 Less than 8 days
- 2 8-13 days
- 3 14-20 days
- 4 More than 20 days
- 7 Don't Know
- 8 Refuse to Answer

Q211. Do you have: **enlarged lymph nodes**

- 1 Yes
- 0 No
- 7 Don't Know
- 8 Refuse to Answer

*If Q211 is equal to 1 then skip to Q212*

*If not, then skip to Q213.*

Q212. For how long have you had it? (Choose one)

- 1 Less than 8 days
- 2 8-13 days
- 3 14-20 days
- 4 More than 20 days
- 7 Don't Know
- 8 Refuse to Answer

Q213. Do you have: **Nausea or vomiting?**

- 1 Yes
- 0 No
- 7 Don't Know
- 8 Refuse to Answer

*If Q213 is equal to 1 then skip to Q214*

*If not, then skip to Q215.*

Q214. For how long have you had it? (Choose one)

- 1 Less than 8 days
- 2 8-13 days
- 3 14-20 days
- 4 More than 20 days
- 7 Don't Know
- 8 Refuse to Answer

Q215. Do you have: **Headache**

- 1 Yes
- 0 No
- 7 Don't Know
- 8 Refuse to Answer

*If Q215 is equal to 1 then skip to Q216*

*If not, then skip to Q217.*

Q216. For how long have you had it? (Choose one)

- 1 Less than 8 days
- 2 8-13 days
- 3 14-20 days
- 4 More than 20 days
- 7 Don't Know
- 8 Refuse to Answer

Q217. Do you have: **Abdominal pain**

- 1 Yes
- 0 No
- 7 Don't Know
- 8 Refuse to Answer

*If Q217 is equal to 1 then skip to Q218*

*If not, then skip to Q219.*

Q218. For how long have you had it? (Choose one)

- 1 Less than 8 days
- 2 8-13 days
- 3 14-20 days
- 4 More than 20 days
- 7 Don't Know
- 8 Refuse to Answer

Q219. Do you have: **Diarrhea (three or more loose/looser than normal stools in a 24 hr period)**

- 1 Yes
- 0 No
- 7 Don't Know
- 8 Refuse to Answer

*If Q219 is equal to 1 then skip to Q220*

***If not, then skip to Q221.***

- Q220. For how long have you had it? (Choose one)
- 1 Less than 8 days
  - 2 8-13 days
  - 3 14-20 days
  - 4 More than 20 days
  - 7 Don't Know
  - 8 Refuse to Answer

- Q221. Do you have: **Sudden loss of smell**
- 1 Yes
  - 0 No
  - 7 Don't Know
  - 8 Refuse to Answer

***If Q221 is equal to 1 then skip to Q222***

***If not, then skip to Q223.***

- Q222. For how long have you had it? (Choose one)
- 1 Less than 8 days
  - 2 8-13 days
  - 3 14-20 days
  - 4 More than 20 days
  - 7 Don't Know
  - 8 Refuse to Answer

- Q223. Do you have: **Sudden loss of taste**
- 1 Yes
  - 0 No
  - 7 Don't Know
  - 8 Refuse to Answer

***If Q223 is equal to 1 then skip to Q224***

***If not, then skip to Q225.***

- Q224. For how long have you had it? (Choose one)
- 1 Less than 8 days
  - 2 8-13 days
  - 3 14-20 days
  - 4 More than 20 days
  - 7 Don't Know
  - 8 Refuse to Answer

- Q225. Do you have: **Joint pain**
- 1 Yes
  - 0 No
  - 7 Don't Know
  - 8 Refuse to Answer

***If Q225 is equal to 1 then skip to Q226***

***If not, then skip to Q227.***

- Q226. For how long have you had it? (Choose one)
- 1 Less than 8 days
  - 2 8-13 days
  - 3 14-20 days
  - 4 More than 20 days
  - 7 Don't Know
  - 8 Refuse to Answer

- Q227. Do you have: **fatigue/extreme tiredness**
- 1 Yes
  - 0 No
  - 7 Don't Know
  - 8 Refuse to Answer

***If Q227 is equal to 1 then skip to Q228***



***If not, then skip to Q229.***

- Q228. For how long have you had it? (Choose one)
- 1 Less than 8 days
  - 2 8-13 days
  - 3 14-20 days
  - 4 More than 20 days
  - 7 Don't Know
  - 8 Refuse to Answer

- Q229. Do you have: **hemoptysis (coughed up blood in phlegm)**
- 1 Yes
  - 0 No
  - 7 Don't Know
  - 8 Refuse to Answer

***If Q229 is equal to 1 then skip to Q230***

***If not, then skip to Q231.***

- Q230. For how long have you had it? (Choose one)
- 1 Less than 8 days
  - 2 8-13 days
  - 3 14-20 days
  - 4 More than 20 days
  - 7 Don't Know
  - 8 Refuse to Answer

- Q231. Do you have: **chest pain or tightness in chest**
- 1 Yes
  - 0 No
  - 7 Don't Know
  - 8 Refuse to Answer

***If Q231 is equal to 1 then skip to Q232***

***If not, then skip to Q233.***

- Q232. For how long have you had it? (Choose one)
- 1 Less than 8 days
  - 2 8-13 days
  - 3 14-20 days
  - 4 More than 20 days
  - 7 Don't Know
  - 8 Refuse to Answer

- Q233. Do you have: **lost weight unintentionally**
- 1 Yes
  - 0 No
  - 7 Don't Know
  - 8 Refuse to Answer

***If Q233 is equal to 1 then skip to Q234***

***If not, then skip to instruction before Q235.***

- Q234. For how long have you had it? (Choose one)
- 1 Less than 8 days
  - 2 8-13 days
  - 3 14-20 days
  - 4 More than 20 days
  - 7 Don't Know
  - 8 Refuse to Answer

**COVID Intersectional Stigma Questions**

**READ: READ TO THE RESPONDENT:** *The following questions are going to ask about whether you were treated differently during the COVID-19 pandemic, when the government asked people to shelter in place, stay at home, and to limit the number of people hanging out in public.*

*By COVID-19, we mean the novel corona virus which is also called corona, the Rona, and Miss Rona. The first few questions will ask how worried you were that you might be treated differently, and the last few questions will ask about different ways you were actually treated differently.*

Q235. When the COVID-19 pandemic began in March 2020 were you worried that you might be verbally or physically harassed by others (including the police) because there were fewer people were in public?

- 1 Yes
- 0 No
- 8 Refuse to Answer

*If Q235 is equal to 1 then skip to instruction before Q236*

*If not, then skip to Q242.*

**READ: READ TO THE RESPONDENT:** *On a scale from 1-5, with 1 being not at all and 5 being a lot, how much was this worry that you would be threatened or harassed due to the following:*

Q236. Worried that you would be threatened or harassed due to: **Your gender** (Choose one)

- 1 Not at all
- 2 A little bit
- 3 Somewhat
- 4 Quiet a bit
- 5 A lot
- 8 Refuse to Answer

Q237. Worried that you would be threatened or harassed due to: **The color of your skin** (Choose one)

- 1 Not at all
- 2 A little bit
- 3 Somewhat
- 4 Quiet a bit
- 5 A lot
- 8 Refuse to Answer

Q238. Worried that you would be threatened or harassed due to: **Visible tattoos or other physical markings** (Choose one)

- 1 Not at all
- 2 A little bit
- 3 Somewhat
- 4 Quiet a bit
- 5 A lot
- 8 Refuse to Answer

Q239. Worried that you would be threatened or harassed due to: **The clothes you wear** (Choose one)

- 1 Not at all
- 2 A little bit
- 3 Somewhat
- 4 Quiet a bit
- 5 A lot
- 8 Refuse to Answer

Q240. Worried that you would be threatened or harassed due to: **Having track marks or other signs of active drug use** (Choose one)

- 1 Not at all
- 2 A little bit
- 3 Somewhat
- 4 Quiet a bit
- 5 A lot
- 8 Refuse to Answer

Q241. Worried that you would be threatened or harassed due to: **Your sexual orientation** (Choose one)

- 1 Not at all
- 2 A little bit
- 3 Somewhat
- 4 Quiet a bit
- 5 A lot
- 8 Refuse to Answer

Q242. When the COVID-19 pandemic began in March 2020 were you worried that you might be verbally or physically harassed by others (including the police) if you wore a mask?

- 1 Yes
- 0 No
- 8 Refuse to Answer

*If Q242 is equal to 1 then skip to instruction before Q243*

*If not, then skip to Q249.*

**READ: READ TO THE RESPONDENT: On a scale from 1-5, with 1 being not at all and 5 being a lot, how much was this worry that you would be threatened or harassed for wearing a mask due to the following:**

Q243. Worried that you would be threatened or harassed for **wearing a mask** due to: **Your gender** (Choose one)

- 1 Not at all
- 2 A little bit
- 3 Somewhat
- 4 Quiet a bit
- 5 A lot
- 8 Refuse to Answer

Q244. Worried that you would be threatened or harassed for **wearing a mask** due to: **The color of your skin** (Choose one)

- 1 Not at all
- 2 A little bit
- 3 Somewhat
- 4 Quiet a bit
- 5 A lot
- 8 Refuse to Answer

Q245. Worried that you would be threatened or harassed for **wearing a mask** due to: **Visible tattoos or other physical markings** (Choose one)

- 1 Not at all
- 2 A little bit
- 3 Somewhat
- 4 Quiet a bit
- 5 A lot
- 8 Refuse to Answer

Q246. Worried that you would be threatened or harassed for **wearing a mask** due to: **The clothes you wear**  
(Choose one)

- 1 Not at all
- 2 A little bit
- 3 Somewhat
- 4 Quiet a bit
- 5 A lot
- 8 Refuse to Answer

Q247. Worried that you would be threatened or harassed for **wearing a mask** due to: **Having track marks or other signs of active drug use** (Choose one)

- 1 Not at all
- 2 A little bit
- 3 Somewhat
- 4 Quiet a bit
- 5 A lot
- 8 Refuse to Answer

Q248. Worried that you would be threatened or harassed for **wearing a mask** due to: **Your sexual orientation**  
(Choose one)

- 1 Not at all
- 2 A little bit
- 3 Somewhat
- 4 Quiet a bit
- 5 A lot
- 8 Refuse to Answer

Q249. During the COVID-19 pandemic did you experience more verbal harassment than before (called names or insulted)?

- 1 Yes
- 0 No
- 8 Refuse to Answer

*If Q249 is equal to 1 then skip to instruction before Q250*

*If not, then skip to Q256.*

**READ: READ TO THE RESPONDENT: On a scale from 1-5, with 1 being not at all and 5 being a lot, how much was this treatment due to the following:**

Q250. Experienced more verbal harassment than before due to: **Your gender** (Choose one)

- 1 Not at all
- 2 A little bit
- 3 Somewhat
- 4 Quiet a bit
- 5 A lot
- 8 Refuse to Answer

Q251. Experienced more verbal harassment than before due to: **The color of your skin** (Choose one)

- 1 Not at all
- 2 A little bit
- 3 Somewhat
- 4 Quiet a bit
- 5 A lot
- 8 Refuse to Answer



Q252. Experienced more verbal harassment than before due to: **Visible tattoos or other physical markings**  
(Choose one)

- 1 Not at all
- 2 A little bit
- 3 Somewhat
- 4 Quiet a bit
- 5 A lot
- 8 Refuse to Answer

Q253. Experienced more verbal harassment than before due to: **The clothes you wear** (Choose one)

- 1 Not at all
- 2 A little bit
- 3 Somewhat
- 4 Quiet a bit
- 5 A lot
- 8 Refuse to Answer

Q254. Experienced more verbal harassment than before due to: **Having track marks or other signs of active drug use** (Choose one)

- 1 Not at all
- 2 A little bit
- 3 Somewhat
- 4 Quiet a bit
- 5 A lot
- 8 Refuse to Answer

Q255. Experienced more verbal harassment than before due to: **Your sexual orientation** (Choose one)

- 1 Not at all
- 2 A little bit
- 3 Somewhat
- 4 Quiet a bit
- 5 A lot
- 8 Refuse to Answer

Q256. During the COVID-19 pandemic were you physically threatened or harmed more than before?

- 1 Yes
- 0 No
- 8 Refuse to Answer

*If Q256 is equal to 1 then skip to instruction before Q257*

*If not, then skip to instruction before Q263.*

**READ: READ TO THE RESPONDENT: On a scale from 1-5, with 1 being not at all and 5 being a lot, how much was this due to the following:**

Q257. Physically threatened or harmed more than before due to: **Your gender** (Choose one)

- 1 Not at all
- 2 A little bit
- 3 Somewhat
- 4 Quiet a bit
- 5 A lot
- 8 Refuse to Answer

Q258. Physically threatened or harmed more than before due to: **The color of your skin** (Choose one)

- 1 Not at all
- 2 A little bit
- 3 Somewhat
- 4 Quiet a bit
- 5 A lot
- 8 Refuse to Answer

Q259. Physically threatened or harmed more than before due to: **Visible tattoos or other physical markings** (Choose one)

- 1 Not at all
- 2 A little bit
- 3 Somewhat
- 4 Quiet a bit
- 5 A lot
- 8 Refuse to Answer

Q260. Physically threatened or harmed more than before due to: **The clothes you wear** (Choose one)

- 1 Not at all
- 2 A little bit
- 3 Somewhat
- 4 Quiet a bit
- 5 A lot
- 8 Refuse to Answer

Q261. Physically threatened or harmed more than before due to: **Having track marks or other signs of active drug use** (Choose one)

- 1 Not at all
- 2 A little bit
- 3 Somewhat
- 4 Quiet a bit
- 5 A lot
- 8 Refuse to Answer

Q262. Physically threatened or harmed more than before due to: **Your sexual orientation** (Choose one)

- 1 Not at all
- 2 A little bit
- 3 Somewhat
- 4 Quiet a bit
- 5 A lot
- 8 Refuse to Answer

GAD-7 ANXIETY SCALE ITEMS

**READ: READ TO THE RESPONDENT: The next few questions are about your mood.**

GAD-7 ANXIETY SCALE ITEMS (COVBO1-COVBO7)

Q263. Over the last 2 weeks, how often have you been bothered by the following problems: **Feeling nervous, anxious, or on edge?** (Choose one)

- 1 Not at all
- 2 Several days
- 3 Over half the days
- 4 Nearly every day
- 7 Don't Know
- 8 Refuse to Answer

Q264. Over the last 2 weeks, how often have you been bothered by: **Not being able to stop or control worrying?** (Choose one)

- 1 Not at all
- 2 Several days
- 3 Over half the days
- 4 Nearly every day
- 7 Don't Know
- 8 Refuse to Answer

Q265. Over the last 2 weeks, how often have you been bothered by: **Worrying too much about different things?** (Choose one)

- 1 Not at all
- 2 Several days
- 3 Over half the days
- 4 Nearly every day
- 7 Don't Know
- 8 Refuse to Answer

Q266. Over the last 2 weeks, how often have you been bothered by: **Trouble relaxing?** (Choose one)

- 1 Not at all
- 2 Several days
- 3 Over half the days
- 4 Nearly every day
- 7 Don't Know
- 8 Refuse to Answer

Q267. Over the last 2 weeks, how often have you been bothered by: **Being so restless that it's hard to sit still?** (Choose one)

- 1 Not at all
- 2 Several days
- 3 Over half the days
- 4 Nearly every day
- 7 Don't Know
- 8 Refuse to Answer

Q268. Over the last 2 weeks, how often have you been bothered by: **Being easily annoyed or irritable?**  
(Choose one)

- 1 Not at all
- 2 Several days
- 3 Over half the days
- 4 Nearly every day
- 7 Don't Know
- 8 Refuse to Answer

Q269. Over the last 2 weeks, how often have you been bothered by: **Feeling afraid as if something awful might happen?** (Choose one)

- 1 Not at all
- 2 Several days
- 3 Over half the days
- 4 Nearly every day
- 7 Don't Know
- 8 Refuse to Answer

***READ: READ TO THE RESPONDENT: Please indicate the extent to which you agree with each of the following statements:***

**BRIEF RESILIENCE SCALE ITEMS (COVCOP1-COVCOP6)**

Q270. I tend to bounce back quickly after hard times. (Choose one)

- 1 Strongly Disagree
- 2 Disagree
- 3 Neutral
- 4 Agree
- 5 Strongly Agree
- 8 Refuse to Answer

- Q271. I have a hard time making it through stressful events. (Choose one)
- 1 Strongly Disagree
  - 2 Disagree
  - 3 Neutral
  - 4 Agree
  - 5 Strongly Agree
  - 8 Refuse to Answer
- Q272. It does not take me long to recover from a stressful event. (Choose one)
- 1 Strongly Disagree
  - 2 Disagree
  - 3 Neutral
  - 4 Agree
  - 5 Strongly Agree
  - 8 Refuse to Answer
- Q273. It is hard for me to snap back when something bad happens. (Choose one)
- 1 Strongly Disagree
  - 2 Disagree
  - 3 Neutral
  - 4 Agree
  - 5 Strongly Agree
  - 8 Refuse to Answer



Q274. I usually come through difficult times with little trouble. (Choose one)

|   |                   |
|---|-------------------|
| 1 | Strongly Disagree |
| 2 | Disagree          |
| 3 | Neutral           |
| 4 | Agree             |
| 5 | Strongly Agree    |
| 8 | Refuse to Answer  |

Q275. I tend to take a long time to get over set-backs in my life. (Choose one)

|   |                   |
|---|-------------------|
| 1 | Strongly Disagree |
| 2 | Disagree          |
| 3 | Neutral           |
| 4 | Agree             |
| 5 | Strongly Agree    |
| 8 | Refuse to Answer  |

Q276. When was your most recent visit to a doctor, nurse, or other health care provider? Includes telemedicine and remote visits. (Choose one)

|   |                                  |
|---|----------------------------------|
| 1 | Within the last two weeks        |
| 2 | Between 2 weeks and a month      |
| 3 | Over a month but within 6 months |
| 4 | 6-12 months ago                  |
| 5 | More than 12 months ago          |
| 8 | Refuse to Answer                 |

Q277. In the last 7 days, have you missed taking any prescribed medications? (Choose one)

- 1 Yes,
- 2 Yes,
- 3 Yes,
- 4 No
- 8 Refu

### Tuberculosis, Perceptions, Testing, and Treatment

**READ: READ TO THE RESPONDENT: The following questions are about your understanding of and feelings about TB. Please answer "Yes" or "No" to each question. If you don't know the answer, that is alright; just tell me you don't know.**

Q278. Can people have TB in their body that is sleeping and not an active form of disease?

1 Yes  
0 No  
7 Don't Know  
8 Refuse to Answer

Q279. Does sharing dishes, bottles, or a toothbrush with someone who has TB increase a person's chance of getting TB?

1 Yes  
0 No  
7 Don't Know  
8 Refuse to Answer

Q280. Can TB be spread from person to person through the air?

1 Yes  
0 No  
7 Don't Know  
8 Refuse to Answer

Q281. Can TB be cured by taking medicines?

1 Yes  
0 No  
7 Don't Know  
8 Refuse to Answer

Q282. Do you have a BCG scar? (by BCG scar I mean that BCG is administered in the bicep, unlike TB skin test (PPD) that is administered in the forearm)

- 1 Yes
- 0 No
- 7 Don't Know
- 8 Refuse to Answer

Q283. Have you ever had a skin test for TB?

- 1 Yes
- 0 No
- 7 Don't Know
- 8 Refuse to Answer

*If Q283 is equal to 1 then skip to Q284*

*If not, then skip to Q285.*

Q284. What was the result of your last test? (Choose one)

- 0 Negative
- 1 Positive
- 2 Indeterminate
- 7 Don't Know
- 8 Refuse to Answer

Q285. Have you ever had a chest X-ray because a medical person thought you might have TB?

- 1 Yes
- 0 No
- 7 Don't Know
- 8 Refuse to Answer

*If Q285 is equal to 1 then skip to Q286*

*If not, then skip to Q287.*

- Q286. When was the last time you had a chest X-ray for TB? (Choose one)
- 1 Within the past month
  - 2 2-6 Months ago
  - 3 7-12 Months ago
  - 4 More than a year ago
  - 5 Don't Know
  - 6 Refuse to Answer

Q287. Have you ever been told by a doctor or health care provider that you have active TB?  
 This does not include having a positive skin test for TB but no symptoms.

- 1 Yes
- 0 No
- 7 Don't Know
- 8 Refuse to Answer

***If Q287 is equal to 1 then skip to Q288***

***If not, then skip to Q293.***

Q288. In which CITY were you told that you have active TB?

-----

Q289. In which STATE were you told that you have active TB?

-----

Q290. In which COUNTRY were you told that you have active TB? (Choose one)

- 0 Mexico
- 1 US
- 2 Other
- 7 Don't Know
- 8 Refuse to Answer

**If Q290 is not equal to 2, then skip to Q292.**

Q291. Specify other country:

-----

Q292. When were you told that you had an active TB test?

|                     |                         |
|---------------------|-------------------------|
| __ __ / __ __ __ __ | mm / yyyy               |
| 2097                | Don't Know (Year)       |
| 2098                | Refuse to Answer (Year) |

|                                                                     |   |                  |
|---------------------------------------------------------------------|---|------------------|
| Q293. Have you ever taken medication for TB disease or sleeping TB? | 1 | Yes              |
|                                                                     | 0 | No               |
|                                                                     | 7 | Don't Know       |
|                                                                     | 8 | Refuse to Answer |

**If Q293 is equal to 1 then skip to Q294**

**If not, then skip to Q298.**

|                                                      |       |                  |
|------------------------------------------------------|-------|------------------|
| Q294. For how many months did you take TB medicines? | __ __ | months           |
|                                                      | 97    | Don't Know       |
|                                                      | 98    | Refuse to Answer |

|                                                                                   |   |                  |
|-----------------------------------------------------------------------------------|---|------------------|
| Q295. Have you stopped taking your medicine sooner than your doctor asked you to? | 1 | Yes              |
|                                                                                   | 0 | No               |
|                                                                                   | 7 | Don't Know       |
|                                                                                   | 8 | Refuse to Answer |

**If Q295 is equal to 1 then skip to Q296**

**If not, then skip to instruction before Q297.**

Q296. What was your reason(s) for stopping early? (**Interviewer: Read out the listed reasons and check all that apply**) (Check all that apply)

- \_\_\_ The drugs made me feel sick
- \_\_\_ The drugs made me feel sick
- \_\_\_ I could not afford to buy the medicine
- \_\_\_ My doctor told me to stop
- \_\_\_ I was deported back to Mexico
- \_\_\_ Other
- \_\_\_ Refuse to Answer

***If Q296F is equal to 1 then skip to Q297***

***If not, then skip to Q298.***

Q297. Specify other reason for stopping early:

-----

- Q298. Have you ever known anyone who had TB?
- 1 Yes
  - 0 No
  - 7 Don't Know
  - 8 Refuse to Answer

***If Q298 is equal to 1 then skip to Q299***

***If not, then skip to instruction before Q301.***

- Q299. How many people have you known who had TB?
- \_\_\_ \_\_\_ \_\_\_ \_\_\_ people
  - 9997 Don't Know
  - 9998 Refuse to Answer

Q300. What was your relationship to that person or persons? (**Interviewer: Read out the listed options and check all that apply**) (Check all that apply)

- Adult family member living with you including spouse
- Child family member living with you
- Non-family member living with you
- Family member NOT living with you
- Sex partner not living with you
- Close friend
- Someone you work with
- Acquaintance (someone you met with once or twice)
- Other drug user
- Other
- Don't Know
- Refuse to Answer

*If Q300J is equal to 1 then skip to Q301*

*If not, then skip to Q302.*

Q301. Specify relationship to that person:

-----

Q302. In the last **6 months**, did you drink raw milk or unpasteurized cheese? This is usually with milk products that haven't been processed in a factory or store like **queso fresco**.

- 1 Yes
- 0 No
- 7 Don't Know
- 8 Refuse to Answer



Q303. Have you **ever** lived or worked on a dairy, ranch, slaughterhouse, or other place where cows are raised or butchered?

- |   |                  |
|---|------------------|
| 1 | Yes              |
| 0 | No               |
| 7 | Don't Know       |
| 8 | Refuse to Answer |

*If Q191 is equal to 1 or Q193 is equal to 1 or Q195 is equal to 1 or Q197 is equal to 1 or Q199 is equal to 1 or Q201 is equal to 1 or Q203 is equal to 1 or Q205 is equal to 1 or Q207 is equal to 1 or Q209 is equal to 1 or Q213 is equal to 1 or Q215 is equal to 1 or Q217 is equal to 1 or Q219 is equal to 1 or Q221 is equal to 1 or Q223 is equal to 1 or Q227 is equal to 1 then READ: "Interviewer, at the end of the interview, you will be prompted to provide the participant with a Covid-19 referral."*

*If Q204 is equal to 4 and (Q195 is equal to 1 or Q197 is equal to 1 or Q207 is equal to 1 or Q209 is equal to 1 or Q211 is equal to 1 or Q225 is equal to 1 or Q227 is equal to 1 or Q231 is equal to 1) or Q229 is equal to 1 then READ: "Interviewer, at the end of the interview, you will be prompted to provide the participant with a TB referral."*

## HIV Self-Tests Section

**READ: READ TO THE RESPONDENT:** *The next set of questions asks about HIV self-tests. An HIV self-test refers to a rapid HIV test that you can give yourself at home or any convenient location by collecting your own saliva or blood via a finger prick with a small needle. If you test HIV-positive on an HIV self-test, you will still need to take a standard HIV test at a clinic or another community-based organization that performs HIV testing to confirm your test result. HIV self-tests are currently available in other countries, including the United States. To plan for the future use of HIV self-tests in Mexico, we would like to know what you think about HIV self-tests.*

Q304. Have you ever used an HIV self-test to test yourself for HIV infection? (Choose one)

- 0 No
- 1 Yes
- 2 Not Applicable (already HIV positive)
- 8 Refuse to Answer

*If Q304 is equal to 2, then skip to instruction before Q314.*

Q305. Would you be willing to use an HIV self-test to test yourself for HIV infection? (Choose one)

- 1 Definitely not
- 2 Probably not
- 3 Not sure, do not know
- 4 Probably
- 5 Definitely
- 8 Refuse to Answer

Q306. Would you be willing to give your sexual partners HIV self-tests to test themselves for HIV infection?  
(Choose one)

- 1 Definitely not
- 2 Probably not
- 3 Not sure, do not know
- 4 Probably
- 5 Definitely
- 8 Refuse to Answer

Q307. Would you be willing to give your drug use partners HIV self-tests to test themselves for HIV infection?  
(Choose one)

- 1 Definitely not
- 2 Probably not
- 3 Not sure, do not know
- 4 Probably
- 5 Definitely
- 8 Refuse to Answer

*If Q305 is equal to 1 or Q305 is equal to 2 or Q305 is equal to 3 then skip to instruction before Q308*

*If not, then skip to instruction before Q311.*

**READ: READ TO THE RESPONDENT: Now I am going to read to you a list of reasons some people do not want to use HIV self-tests. Please indicate the extent to which you agree or disagree with each statement.**

Q308. I would not want to use an HIV self-test because **I would be worried that HIV self-tests are less accurate than standard HIV tests.**

(Choose one)

- 1 Strongly disagree
- 2 Disagree
- 3 Neither agree nor disagree
- 4 Agree
- 5 Strongly agree
- 8 Refuse to Answer

Q309. I would not want to use an HIV self-test because **I would be worried about using the test incorrectly.**

(Choose one)

- 1 Strongly disagree
- 2 Disagree
- 3 Neither agree nor disagree
- 4 Agree
- 5 Strongly agree
- 8 Refuse to Answer

Q310. I would not want to use an HIV self-test because **I would be worried about misinterpreting the test result.**

(Choose one)

- 1 Strongly disagree
- 2 Disagree
- 3 Neither agree nor disagree
- 4 Agree
- 5 Strongly agree
- 8 Refuse to Answer

***If Q305 is equal to 3 or Q305 is equal to 4 or Q305 is equal to 5 then skip to instruction before Q311***

*If not, then skip to instruction before Q314.*

**READ: READ TO THE RESPONDENT:** *Now I am going to read to you a list of reasons that motivate some people to use HIV self-tests. Please indicate the extent to which you agree or disagree with each statement.*

Q311. I would be motivated to use HIV self-tests **because I would be able to test for HIV more regularly.**  
(Choose one)

- 1 Strongly disagree
- 2 Disagree
- 3 Neither agree nor disagree
- 4 Agree
- 5 Strongly agree
- 8 Refuse to Answer

Q312. I would be motivated to use an HIV self-test **because it would be more convenient than going to a clinic or community-based organization for a standard HIV test.** (Choose one)

- 1 Strongly disagree
- 2 Disagree
- 3 Neither agree nor disagree
- 4 Agree
- 5 Strongly agree
- 8 Refuse to Answer

Q313. I would be motivated to use an HIV self-test **because it would give me more privacy and help ensure the confidentiality of my HIV test result.** (Choose one)

- 1 Strongly disagree
- 2 Disagree
- 3 Neither agree nor disagree
- 4 Agree
- 5 Strongly agree
- 8 Refuse to Answer

**Methadone, Buprenorphine, Suboxone Stigma Section**

**READ: READ TO THE RESPONDENT: The next questions will be about access to drug rehabilitation treatment. We talked about this in your initial visit a bit. Can you remind of your experiences with drug rehabilitation programs?**

Q314. Have you ever been enrolled in a Methadone program? **(Interviewer: If participant says, "Don't know," READ: Methadone is an oral replacement therapy, which means the medication is given to you orally to help you deal with your addiction).**

1 Yes  
 0 No  
 8 Refuse to Answer

*If Q314 is equal to 1 then skip to Q315*

*If not, then skip to Q316.*

Q315. Are you currently enrolled in a Methadone program?

1 Yes  
 0 No  
 8 Refuse to Answer

Q316. Have you ever been enrolled in a Buprenorphine/ Suboxone program? **(Interviewer: If participant says, "Don't know," READ: Buprenorphine/Suboxone is an oral replacement therapy similar to methadone, which means the medication is given to you orally to help you deal with your addiction)**

1 Yes  
 0 No  
 8 Refuse to Answer

*If Q316 is equal to 1 then skip to Q317*

*If not, then skip to instruction before Q318.*

Q317. Are you currently enrolled in a Buprenorphine/Suboxone program?

1 Yes  
 0 No  
 8 Refuse to Answer

**Methadone Maintenance Treatment Stigma Mechanism Scale (MMT-SMS)**

*If Q315 is equal to 1 and Q15 is equal to 1 then skip to instruction before Q318*

*If not, then skip to instruction before Q343.*

**READ: READ TO THE RESPONDENT:** *The following questions ask about receiving medications for opioid dependence like methadone, maintenance treatment. Please think about each question and circle your answer. The first group of questions asks you about how people will treat you in the future because of your methadone maintenance treatment. The second group of questions asks you about how people have treated you in the past because of your methadone maintenance treatment. The third group of questions asks about how you feel about your methadone maintenance treatment.*

**READ: READ THE FOLLOWING TO THE RESPONDENT AND THEN MOVE ON TO THE NEXT SCREEN AND READ THE RELATED STATEMENTS:** *How often have people treated you this way in the past because you receive methadone?*

ENACTED SCALE ITEMS (ES1-ES9)

- Q318. Family members have thought that I'm still a drug user. (Choose one)
- 1 Never
  - 2 Not often
  - 3 Somewhat often
  - 4 Often
  - 5 Very often
  - 8 Refuse to Answer

- Q319. Family members have not supported my methadone treatment. (Choose one)
- 1 Never
  - 2 Not often
  - 3 Somewhat often
  - 4 Often
  - 5 Very often
  - 8 Refuse to Answer



- Q320. Family members have thought that I cannot recover. (Choose one)
- 1 Never
  - 2 Not often
  - 3 Somewhat often
  - 4 Often
  - 5 Very often
  - 8 Refuse to Answer
- Q321. Employers have thought that I'm still a drug user. (Choose one)
- 1 Never
  - 2 Not often
  - 3 Somewhat often
  - 4 Often
  - 5 Very often
  - 8 Refuse to Answer
- Q322. Employers have thought that I'm a bad employee. (Choose one)
- 1 Never
  - 2 Not often
  - 3 Somewhat often
  - 4 Often
  - 5 Very often
  - 8 Refuse to Answer

Q323. Employers have thought that managing my methadone dosage schedule will be a problem. (Choose one)

- 1 Never
- 2 Not often
- 3 Somewhat often
- 4 Often
- 5 Very often
- 8 Refuse to Answer

Q324. Healthcare workers have thought that I'm still a drug user. (Choose one)

- 1 Never
- 2 Not often
- 3 Somewhat often
- 4 Often
- 5 Very often
- 8 Refuse to Answer

Q325. Healthcare workers have given me poor treatment. (Choose one)

- 1 Never
- 2 Not often
- 3 Somewhat often
- 4 Often
- 5 Very often
- 8 Refuse to Answer

Q326. Healthcare workers have not prescribed me medication that I needed. (Choose one)

- 1 Never
- 2 Not often
- 3 Somewhat often
- 4 Often
- 5 Very often
- 8 Refuse to Answer

**READ: READ THE FOLLOWING TO THE RESPONDENT AND THEN MOVE ON TO THE NEXT SCREEN AND READ THE RELATED STATEMENTS: How likely is it that people will treat you in the following ways in the future because you receive methadone?**

ANTICIPATED SCALE ITEMS (AS1-AS9)

Q327. Family members will think that I'm still a drug user. (Choose one)

- 1 Never
- 2 Not often
- 3 Somewhat often
- 4 Often
- 5 Very often
- 8 Refuse to Answer

Q328. Family members will not support my methadone treatment. (Choose one)

- 1 Never
- 2 Not often
- 3 Somewhat often
- 4 Often
- 5 Very often
- 8 Refuse to Answer

- Q329. Family members will think that I cannot recover. (Choose one)
- 1 Never
  - 2 Not often
  - 3 Somewhat often
  - 4 Often
  - 5 Very often
  - 8 Refuse to Answer
- Q330. Employers will think that I'm still a drug user. (Choose one)
- 1 Never
  - 2 Not often
  - 3 Somewhat often
  - 4 Often
  - 5 Very often
  - 8 Refuse to Answer
- Q331. Employers will think that I'm a bad employee. (Choose one)
- 1 Never
  - 2 Not often
  - 3 Somewhat often
  - 4 Often
  - 5 Very often
  - 8 Refuse to Answer

Q332. Employers will think that managing my methadone treatment schedule will be a problem. (Choose one)

- 1 Never
- 2 Not often
- 3 Somewhat often
- 4 Often
- 5 Very often
- 8 Refuse to Answer

Q333. Healthcare workers will think that I'm still a drug user. (Choose one)

- 1 Never
- 2 Not often
- 3 Somewhat often
- 4 Often
- 5 Very often
- 8 Refuse to Answer

Q334. Healthcare workers will give me poor care. (Choose one)

- 1 Never
- 2 Not often
- 3 Somewhat often
- 4 Often
- 5 Very often
- 8 Refuse to Answer

Q335. Healthcare workers will not prescribe me medication that I need. (Choose one)

- 1 Never
- 2 Not often
- 3 Somewhat often
- 4 Often
- 5 Very often
- 8 Refuse to Answer

**INTERNALIZED STIGMA ITEMS (IS1-IS7)**

Q336. Receiving methadone makes me feel like I'm a bad person. (Choose one)

- 1 Never
- 2 Not often
- 3 Somewhat often
- 4 Often
- 5 Very often
- 8 Refuse to Answer

Q337. I feel I'm not as good as others because I receive methadone. (Choose one)

- 1 Never
- 2 Not often
- 3 Somewhat often
- 4 Often
- 5 Very often
- 8 Refuse to Answer

- Q338. I feel ashamed of my methadone treatment. (Choose one)
- 1 Never
  - 2 Not often
  - 3 Somewhat often
  - 4 Often
  - 5 Very often
  - 8 Refuse to Answer
- Q339. I think less of myself because I receive methadone. (Choose one)
- 1 Never
  - 2 Not often
  - 3 Somewhat often
  - 4 Often
  - 5 Very often
  - 8 Refuse to Answer
- Q340. Receiving methadone makes me feel unclean. (Choose one)
- 1 Never
  - 2 Not often
  - 3 Somewhat often
  - 4 Often
  - 5 Very often
  - 8 Refuse to Answer
- Q341. Being on methadone treatment is disgusting to me. (Choose one)
- 1 Never
  - 2 Not often
  - 3 Somewhat often
  - 4 Often
  - 5 Very often
  - 8 Refuse to Answer

Q342. Being on methadone treatment makes me feel like I'm still a drug user. (Choose one)

- 1 Never
- 2 Not often
- 3 Somewhat often
- 4 Often
- 5 Very often
- 8 Refuse to Answer



**NEVER on MMT Methadone Maintenance Treatment Stigma (18 items)**

METHADONE MAINTENANCE TREATMENT STIGMA (18 items)-MMTS1-MMTS18. Note: MMTS17 is reversed coded.

*If Q314 is not equal to 1 then skip to instruction before Q343*

*If not, then skip to instruction before Q361.*

**READ:** *Interviewer, read to the respondent: Methadone is a medication that can be taken to treat opioid dependence. Methadone is medication that treats heroin addiction and other opioids. It reduces withdrawal symptoms and drug cravings, but won't make you feel high. These questions will ask about how you might be treated in the future if you were to take methadone. Please select one response option for each question. Do not spend too much time considering your answer. Your first impression is usually best.*

Q343. How concerned are you that you will be denied housing if you take methadone? **(Choose one)** (Choose one)

- 1 Not at all
- 2 A little bit
- 3 Somewhat
- 4 Quite a bit
- 5 Extremely
- 8 Refuse to Answer

Q344. How concerned are you that you will be denied employment if you take methadone? **(Choose one)** (Choose one)

- 1 Not at all
- 2 A little bit
- 3 Somewhat
- 4 Quite a bit
- 5 Extremely
- 8 Refuse to Answer

Q345. How concerned are you that you will be denied government assistance or similar benefits if you take methadone? **(Choose one)** (Choose one)

- |   |                  |
|---|------------------|
| 1 | Not at all       |
| 2 | A little bit     |
| 3 | Somewhat         |
| 4 | Quite a bit      |
| 5 | Extremely        |
| 8 | Refuse to Answer |

**READ: READ THE FOLLOWING TO THE RESPONDENT AND THEN MOVE ON TO THE NEXT SCREEN AND READ THE RELATED STATEMENTS: How likely is it that people will treat you in the following ways in the future if you were to take methadone?**

Q346. Family members will think that Im still a drug user. **(Choose one)** (Choose one)

- |   |                  |
|---|------------------|
| 1 | Never            |
| 2 | Not often        |
| 3 | Somewhat often   |
| 4 | Often            |
| 5 | Very often       |
| 8 | Refuse to Answer |

Q347. Family members will not support my methadone treatment. **(Choose one)** (Choose one)

- |   |                  |
|---|------------------|
| 1 | Never            |
| 2 | Not often        |
| 3 | Somewhat often   |
| 4 | Often            |
| 5 | Very often       |
| 8 | Refuse to Answer |

Q348. Family members will think that I cannot recover. **(Choose one)** (Choose one)

- 1 Never
- 2 Not often
- 3 Somewhat often
- 4 Often
- 5 Very often
- 8 Refuse to Answer

Q349. Healthcare workers will think that Im still a drug user. **(Choose one)** (Choose one)

- 1 Never
- 2 Not often
- 3 Somewhat often
- 4 Often
- 5 Very often
- 8 Refuse to Answer

Q350. Healthcare workers will give me poor care. **(Choose one)** (Choose one)

- 1 Never
- 2 Not often
- 3 Somewhat often
- 4 Often
- 5 Very often
- 8 Refuse to Answer

Q351. Healthcare workers will not prescribe me medication that I need. **(Choose one)** (Choose one)

- 1 Never
- 2 Not often
- 3 Somewhat often
- 4 Often
- 5 Very often
- 8 Refuse to Answer

Q352. Other people who inject drugs will think Im weak if I take methadone. **(Choose one)** (Choose one)

- 1 Never
- 2 Not often
- 3 Somewhat often
- 4 Often
- 5 Very often
- 8 Refuse to Answer

Q353. Other people who inject drugs will not support me if I take methadone. **(Choose one)** (Choose one)

- 1 Never
- 2 Not often
- 3 Somewhat often
- 4 Often
- 5 Very often
- 8 Refuse to Answer

Q354. Other people who inject drugs wont trust me if I take methadone. **(Choose one)** (Choose one)

- 1 Never
- 2 Not often
- 3 Somewhat often
- 4 Often
- 5 Very often
- 8 Refuse to Answer

**READ: READ THE FOLLOWING TO THE RESPONDENT AND THEN MOVE ON TO THE NEXT SCREEN AND READ THE RELATED STATEMENTS: How do you feel about people who take methadone?**

Q355. People who take methadone are replacing one drug for another. **(Choose one)** (Choose one)

- 1 Strongly disagree
- 2 Disagree
- 3 Neither disagree nor agree
- 4 Agree
- 5 Strongly agree
- 8 Refuse to Answer

Q356. People who take methadone cannot be trusted. **(Choose one)** (Choose one)

- 1 Strongly disagree
- 2 Disagree
- 3 Neither disagree nor agree
- 4 Agree
- 5 Strongly agree
- 8 Refuse to Answer

Q357. People who take methadone are not in control of their own life. (Choose one) (Choose one)

- 1 Strongly disagree
- 2 Disagree
- 3 Neither disagree nor agree
- 4 Agree
- 5 Strongly agree
- 8 Refuse to Answer

Q358. People who take methadone make me feel uncomfortable. (Choose one) (Choose one)

- 1 Strongly disagree
- 2 Disagree
- 3 Neither disagree nor agree
- 4 Agree
- 5 Strongly agree
- 8 Refuse to Answer

Q359. People who take methadone make me feel hopeful. (Choose one) (Choose one)

- 1 Strongly agree
- 2 Agree
- 3 Neither disagree nor agree
- 4 Agree
- 5 Strongly agree
- 8 Refuse to Answer

Q360. People who take methadone make me feel angry. (Choose one) (Choose one)

- 1 Strongly disagree
- 2 Disagree
- 3 Neither disagree nor agree
- 4 Agree
- 5 Strongly agree
- 8 Refuse to Answer

## Buprenorphine/Suboxone Maintenance Treatment Stigma Mechanism Scale (BSMT-SMS)

*If Q317 is equal to 1 and Q15 is equal to 1 then skip to instruction before Q361*

*If not, then skip to instruction before Q386.*

**READ: Interviewer, READ TO THE RESPONDENT:***The following questions ask about receiving medications for opioid dependence like buprenorphine or Suboxone maintenance treatment. Please think about each question and circle your answer. The first group of questions asks you about how people will treat you in the future because of your buprenorphine or Suboxone maintenance treatment. The second group of questions asks you about how people have treated you in the past because of your buprenorphine or Suboxone maintenance treatment. The third group of questions asks about how you feel about your buprenorphine or Suboxone maintenance treatment.*

**READ: READ THE FOLLOWING TO THE RESPONDENT AND THEN MOVE ON TO THE NEXT SCREEN AND READ THE RELATED STATEMENTS:***How often have people treated you this way in the past because you receive buprenorphine or Suboxone?*

### ENACTED STIGMA ITEMS (BSES1-BSES9)

- Q361. Family members have thought that I'm still a drug user. (Choose one)
- |   |                  |
|---|------------------|
| 1 | Never            |
| 2 | Not often        |
| 3 | Somewhat often   |
| 4 | Often            |
| 5 | Very often       |
| 8 | Refuse to Answer |



Q362. Family members have not supported my buprenorphine/ Suboxone treatment. (Choose one)

- 1 Never
- 2 Not often
- 3 Somewhat often
- 4 Often
- 5 Very often
- 8 Refuse to Answer

Q363. Family members have thought that I cannot recover. (Choose one)

- 1 Never
- 2 Not often
- 3 Somewhat often
- 4 Often
- 5 Very often
- 8 Refuse to Answer

Q364. Employers have thought that Im still a drug user. (Choose one)

- 1 Never
- 2 Not often
- 3 Somewhat often
- 4 Often
- 5 Very often
- 8 Refuse to Answer

Q365. Employers have thought that Im a bad employee. (Choose one)

|   |                  |
|---|------------------|
| 1 | Never            |
| 2 | Not often        |
| 3 | Somewhat often   |
| 4 | Often            |
| 5 | Very often       |
| 8 | Refuse to Answer |

Q366. Employers have thought that managing my buprenorphine/ Suboxone dosage schedule will be a problem. (Choose one)

|   |                  |
|---|------------------|
| 1 | Never            |
| 2 | Not often        |
| 3 | Somewhat often   |
| 4 | Often            |
| 5 | Very often       |
| 8 | Refuse to Answer |

Q367. Healthcare workers have thought that Im still a drug user. (Choose one)

|   |                  |
|---|------------------|
| 1 | Never            |
| 2 | Not often        |
| 3 | Somewhat often   |
| 4 | Often            |
| 5 | Very often       |
| 8 | Refuse to Answer |

- Q368. Healthcare workers have given me poor treatment. (Choose one)
- |   |                  |
|---|------------------|
| 1 | Never            |
| 2 | Not often        |
| 3 | Somewhat often   |
| 4 | Often            |
| 5 | Very often       |
| 8 | Refuse to Answer |

- Q369. Healthcare workers have not prescribed me medication that I needed. (Choose one)
- |   |                  |
|---|------------------|
| 1 | Never            |
| 2 | Not often        |
| 3 | Somewhat often   |
| 4 | Often            |
| 5 | Very often       |
| 8 | Refuse to Answer |

**READ: READ THE FOLLOWING TO THE RESPONDENT AND THEN MOVE ON TO THE NEXT SCREEN AND READ THE RELATED STATEMENTS: How likely is it that people will treat you in the following ways in the future because you receive buprenorphine or Suboxone?**

ANTICIPATED STIGMA ITEMS (BSAS1-BSAS9)

- Q370. Family members will think that Im still a drug user. (Choose one)
- |   |                  |
|---|------------------|
| 1 | Never            |
| 2 | Not often        |
| 3 | Somewhat often   |
| 4 | Often            |
| 5 | Very often       |
| 8 | Refuse to Answer |

Q371. Family members will not support my buprenorphine/ Suboxone treatment. (Choose one)

- 1 Never
- 2 Not often
- 3 Somewhat often
- 4 Often
- 5 Very often
- 8 Refuse to Answer

Q372. Family members will think that I cannot recover. (Choose one)

- 1 Never
- 2 Not often
- 3 Somewhat often
- 4 Often
- 5 Very often
- 8 Refuse to Answer

Q373. Employers will think that Im still a drug user. (Choose one)

- 1 Never
- 2 Not often
- 3 Somewhat often
- 4 Often
- 5 Very often
- 8 Refuse to Answer

Q374. Employers will think that Im a bad employee. (Choose one)

|   |                  |
|---|------------------|
| 1 | Never            |
| 2 | Not often        |
| 3 | Somewhat often   |
| 4 | Often            |
| 5 | Very often       |
| 8 | Refuse to Answer |

Q375. Employers will think that managing my buprenorphine/ Suboxone treatment schedule will be a problem. (Choose one)

|   |                  |
|---|------------------|
| 1 | Never            |
| 2 | Not often        |
| 3 | Somewhat often   |
| 4 | Often            |
| 5 | Very often       |
| 8 | Refuse to Answer |

Q376. Healthcare workers will think that Im still a drug user. (Choose one)

|   |                  |
|---|------------------|
| 1 | Never            |
| 2 | Not often        |
| 3 | Somewhat often   |
| 4 | Often            |
| 5 | Very often       |
| 8 | Refuse to Answer |

Q377. Healthcare workers will give me poor care. (Choose one)

|   |                  |
|---|------------------|
| 1 | Never            |
| 2 | Not often        |
| 3 | Somewhat often   |
| 4 | Often            |
| 5 | Very often       |
| 8 | Refuse to Answer |

Q378. Healthcare workers will not prescribe me medication that I need. (Choose one)

|   |                  |
|---|------------------|
| 1 | Never            |
| 2 | Not often        |
| 3 | Somewhat often   |
| 4 | Often            |
| 5 | Very often       |
| 8 | Refuse to Answer |

INTERNALIZED STIGMA ITEMS (BSIS1-BSIS7)

Q379. Receiving buprenorphine/saboxone makes me feel like Im a bad person. (Choose one)

|   |                  |
|---|------------------|
| 1 | Never            |
| 2 | Not often        |
| 3 | Somewhat often   |
| 4 | Often            |
| 5 | Very often       |
| 8 | Refuse to Answer |

Q380. I feel Im not as good as others because I receive buprenorphine/saboxone. (Choose one)

- 1 Never
- 2 Not often
- 3 Somewhat often
- 4 Often
- 5 Very often
- 8 Refuse to Answer

Q381. I feel ashamed of my buprenorphine/saboxone treatment. (Choose one)

- 1 Never
- 2 Not often
- 3 Somewhat often
- 4 Often
- 5 Very often
- 8 Refuse to Answer

Q382. I think less of myself because I receive buprenorphine/saboxone. (Choose one)

- 1 Never
- 2 Not often
- 3 Somewhat often
- 4 Often
- 5 Very often
- 8 Refuse to Answer

Q383. Receiving buprenorphine/ saboxone makes me feel unclean. (Choose one)

- 1 Never
- 2 Not often
- 3 Somewhat often
- 4 Often
- 5 Very often
- 8 Refuse to Answer

Q384. Being on buprenorphine/ saboxone treatment is disgusting to me. (Choose one)

- 1 Never
- 2 Not often
- 3 Somewhat often
- 4 Often
- 5 Very often
- 8 Refuse to Answer

Q385. Being on buprenorphine/ saboxone treatment makes me feel like Im still a drug user. (Choose one)

- 1 Never
- 2 Not often
- 3 Somewhat often
- 4 Often
- 5 Very often
- 8 Refuse to Answer



**NEVER on B/Smt BUPRENORPHINE/ SUBOXONE Maintenance Treatment Stigma (18 items)**

*If Q316 is not equal to 1 and Q15 is equal to 1 then skip to instruction before Q386*

*If not, then skip to Q404.*

**READ: Interviewer, READ TO THE RESPONDENT: Buprenorphine and Suboxone are medications that treat heroin addiction and other opioids. They reduce withdrawal symptoms and drug cravings, but won't make you feel high. These questions will ask about how you might be treated in the future if you were to take buprenorphine or Suboxone.**

**Please select one response option for each question. Do not spend too much time considering your answer. Your first impression is usually best.**

BUPRENORPHINE/ SUBOXONE MAINTENANCE TREATMENT STIGMA (18 items)-BMTS1-BMTS18. Note: BMTS17 is reversed coded.

Q386. How concerned are you that you will be denied housing if you take buprenorphine/ Suboxone? (Choose one)

- 1 Not at all
- 2 A little bit
- 3 Somewhat
- 4 Quite a bit
- 5 Extremely
- 8 Refuse to Answer

Q387. How concerned are you that you will be denied employment if you take buprenorphine/ Suboxone? (Choose one)

- 1 Not at all
- 2 A little bit
- 3 Somewhat
- 4 Quite a bit
- 5 Extremely
- 8 Refuse to Answer

Q388. **How concerned are you that you will be denied government assistance or similar benefits if you take buprenorphine/ Suboxone?** (Choose one)

- 1 Not at all
- 2 A little bit
- 3 Somewhat
- 4 Quite a bit
- 5 Extremely
- 8 Refuse to Answer

**READ: READ THE FOLLOWING TO THE RESPONDENT AND THEN MOVE ON TO THE NEXT SCREEN AND READ THE RELATED STATEMENTS: How likely is it that people will treat you in the following ways in the future if you were to take buprenorphine/ Suboxone?**

Q389. Family members will think that Im still a drug user. (Choose one)

- 1 Never
- 2 Not often
- 3 Somewhat often
- 4 Often
- 5 Very often
- 8 Refuse to Answer

Q390. Family members will not support my buprenorphine/ Suboxone treatment. (Choose one)

- 1 Never
- 2 Not often
- 3 Somewhat often
- 4 Often
- 5 Very often
- 8 Refuse to Answer

- Q391. Family members will think that I cannot recover. (Choose one)
- 1 Never
  - 2 Not often
  - 3 Somewhat often
  - 4 Often
  - 5 Very often
  - 8 Refuse to Answer
- Q392. Healthcare workers will think that Im still a drug user. (Choose one)
- 1 Never
  - 2 Not often
  - 3 Somewhat often
  - 4 Often
  - 5 Very often
  - 8 Refuse to Answer
- Q393. Healthcare workers will give me poor care. (Choose one)
- 1 Never
  - 2 Not often
  - 3 Somewhat often
  - 4 Often
  - 5 Very often
  - 8 Refuse to Answer

Q394. Healthcare workers will not prescribe me medication that I need. (Choose one)

- 1 Never
- 2 Not often
- 3 Somewhat often
- 4 Often
- 5 Very often
- 8 Refuse to Answer

Q395. Other people who inject drugs will think Im weak if I take buprenorphine/ Suboxone. (Choose one)

- 1 Never
- 2 Not often
- 3 Somewhat often
- 4 Often
- 5 Very often
- 8 Refuse to Answer

Q396. Other people who inject drugs will not support me if I take buprenorphine/ Suboxone. (Choose one)

- 1 Never
- 2 Not often
- 3 Somewhat often
- 4 Often
- 5 Very often
- 8 Refuse to Answer

Q397. Other people who inject drugs wont trust me if I take buprenorphine/ Suboxone. (Choose one)

- 1 Never
- 2 Not often
- 3 Somewhat often
- 4 Often
- 5 Very often
- 8 Refuse to Answer

**READ: READ THE FOLLOWING TO THE RESPONDENT AND THEN MOVE ON TO THE NEXT SCREEN AND READ THE RELATED STATEMENTS: How do you feel about people who take buprenorphine/ Suboxone?**

Q398. People who take buprenorphine/ Suboxone are replacing one drug for another. (Choose one)

- 1 Strongly disagree
- 2 Disagree
- 3 Neither disagree nor agree
- 4 Agree
- 5 Strongly agree
- 8 Refuse to Answer

Q399. People who take buprenorphine/ Suboxone cannot be trusted. (Choose one)

- 1 Strongly disagree
- 2 Disagree
- 3 Neither disagree nor agree
- 4 Agree
- 5 Strongly agree
- 8 Refuse to Answer

Q400. People who take buprenorphine/ Suboxone are not in control of their own life. (Choose one)

- 1 Strongly disagree
- 2 Disagree
- 3 Neither disagree nor agree
- 4 Agree
- 5 Strongly agree
- 8 Refuse to Answer

Q401. People who take buprenorphine/ Suboxone make me feel uncomfortable. (Choose one)

- 1 Strongly disagree
- 2 Disagree
- 3 Neither disagree nor agree
- 4 Agree
- 5 Strongly agree
- 8 Refuse to Answer

Q402. People who take buprenorphine/ Suboxone make me feel hopeful. (Choose one)

- 1 Strongly disagree
- 2 Disagree
- 3 Neither disagree nor agree
- 4 Agree
- 5 Strongly agree
- 8 Refuse to Answer

Q403. People who take buprenorphine/ Suboxone make me feel angry. (Choose one)

- 1 Strongly disagree
- 2 Disagree
- 3 Neither disagree nor agree
- 4 Agree
- 5 Strongly agree
- 8 Refuse to Answer

Q404. In the next section, you will be asked to list the names of people in your social network, along with questions about them such as your relationship to them, and the sexual and drug use practices of these people who are not in the study (i.e. they have not provided consent). This information is very important for improving disease prevention strategies to reduce HIV transmission in communities. However, there is a possibility that your sharing of information about members of your social network without their consent will become known to them and/or the community through speculation. We would like to assure you that we will never contact anyone you name during the survey under any circumstance, and we will never share this information with anyone outside of the people working on this study. The information you share with us is private and confidential, and we will make every effort to safeguard such information from unauthorized access or dissemination. If you feel uncomfortable about providing names, you may provide nicknames or initials instead, or opt out of individual questions. **Do we have your consent to proceed to these questions?**

- 1 Yes
- 0 No
- 8 Refuse to Answer

*If Q404 is equal to 1 then skip to instruction before Q405*

*If not, then skip to Q1150.*

**READ: Interviewer, SAY TO THE RESPONDENT: For this survey we will be talking about people you hang out with frequently and that you consider friends. I'm going to ask you about people you know well. We are trying to learn about how people are connected to one another and how those connections relate to preventing HIV infection and other diseases. Having names and demographic information will help us see how people in this study are connected to one another, for example through mutual friends. Please keep in mind that everything you tell me is confidential and that we will protect your privacy and the privacy of the people you mention. We will never at any time use this information to contact the people you tell us about.**

**Specifically, I'm going to ask you about how many people you know who you have seen in the past 30 days who you talk to about things that are important to you. These people could be your partner (girlfriend/boyfriend, wife/husband), family, friends, people you use drugs with, or anyone else you consider yourself close with. For example, a person that reminds you to take medication, someone you ask to borrow money, someone you pool drugs or money with, someone you use drugs with, or someone you talk with about drug use or personal issues. Remember, we are only interested in those people you have seen in the past 30 days.**

Q405. Please tell me how many friends or people who you associate with and talk to about things that are important to you, have you seen in the past 30 days?

\_\_\_\_\_ people  
998 Refuse to Answer

**If Q405 is equal to 0 or Q405 is equal to 998, then skip to instruction before Q686.**

**READ: What are the names of these people? Please start with the one closest to you. Interviewer: In the screens that follow, you'll be prompted to enter the names.**

**If Q405 is greater than 0 then skip to Q406**

**If not, then skip to instruction before Q408.**

Q406. What is the name of the person closest to you that you talked to about things that are important to you and you have seen in the past 30 days? **Interviewer: IF THE PARTICIPANT IS RELUCTANT TO GIVE FULL NAME READ THE FOLLOWING TO THEM: If you do not want to give us their full name you can use initials or just their First name or a nickname, so that you will know who we are talking about when I ask you follow up questions about this person. If the participant gives ONLY a nickname or just initials, enter it here and on the next screen.**

-----  
**If Q406 is equal to "Refuse to Answer", then skip to instruction before Q446.**

Q407. Can you tell me [Response to Q406]'s nickname if they have one? Interviewer, please record the nickname.



*If Q405 is greater than 1 then skip to Q408*

*If not, then skip to instruction before Q410.*

Q408. So, the name of the first person that you talked to about things that are important to you and you have seen in the past 30 days is [Response to Q406]. What is the name of the 2nd person? **Interviewer: If the participant is having a hard time naming anyone, read to them: "Please think back to the last time or two you talked with a family member, friend or partner about things that are important to you. Can you recall their names?" IF THE PARTICIPANT IS RELUCTANT TO GIVE THE PERSON'S FULL NAME, tell them that they can use initials or just the first name or a nickname.**

-----

*If Q408 is equal to "Refuse to Answer", then skip to instruction before Q446.*

Q409. Can you tell me [Response to Q408]'s nickname if they have one? Interviewer, please record the nickname.

-----

*If Q405 is greater than 2 then skip to Q410*

*If not, then skip to instruction before Q412.*

Q410. So far you named [Response to Q406] and [Response to Q408]. What is the name of the 3rd person? **Interviewer: If the participant is having a hard time naming anyone, read to them: "Please think back to the last time or two you talked with a family member, friend or partner about things that are important to you. Can you recall their names?" IF THE PARTICIPANT IS RELUCTANT TO GIVE THE PERSON'S FULL NAME, tell them that they can use initials or just the first name or a nickname.**

-----

*If Q410 is equal to "Refuse to Answer", then skip to instruction before Q446.*

Q411. Can you tell me [Response to Q410]'s nickname if they have one? Interviewer, please record the nickname.

-----

*If Q405 is greater than 3 then skip to Q412*

*If not, then skip to instruction before Q414.*

Q412. So far you named [Response to Q406], [Response to Q408] and [Response to Q410]. What is the name of the 4th person? **Interviewer: If the participant is having a hard time naming anyone, read to them: "Please think back to the last time or two you talked with a family member, friend or partner about things that are important to you. Can you recall their names?" IF THE PARTICIPANT IS RELUCTANT TO GIVE THE PERSON'S FULL NAME, tell them that they can use initials or just the first name or a nickname.**

---

*If Q412 is equal to "Refuse to Answer", then skip to instruction before Q446.*

Q413. Can you tell me [Response to Q412]'s nickname if they have one? Interviewer, please record the nickname.

---

*If Q405 is greater than 4 then skip to Q414*

*If not, then skip to instruction before Q416.*

Q414. So far you named [Response to Q406], [Response to Q408], [Response to Q410] and [Response to Q412]. What is the name of the 5th person? **Interviewer: If the participant is having a hard time naming anyone, read to them: "Please think back to the last time or two you talked with a family member, friend or partner about things that are important to you. Can you recall their names?" IF THE PARTICIPANT IS RELUCTANT TO GIVE THE PERSON'S FULL NAME, tell them that they can use initials or just the first name or a nickname.**

---

*If Q414 is equal to "Refuse to Answer", then skip to instruction before Q446.*

Q415. Can you tell me [Response to Q414]'s nickname if they have one? Interviewer, please record the nickname.

---

*If Q405 is greater than 5 then skip to Q416*

*If not, then skip to instruction before Q418.*

Q416. So far you named [Response to Q406], [Response to Q408], [Response to Q410], [Response to Q412], and [Response to Q414]. Can you tell me what the name of the 6th person is?

---

*If Q416 is equal to "Refuse to Answer", then skip to instruction before Q446.*

Q417. Can you tell me [Response to Q416]'s nickname if they have one? Interviewer, please record the nickname.

-----

***If Q405 is greater than 6 then skip to Q418***

***If not, then skip to instruction before Q420.***

Q418. So far you named [Response to Q406], [Response to Q408], [Response to Q410], [Response to Q412], [Response to Q414], and [Response to Q416]. What is the name of the 7th person.

-----

***If Q418 is equal to "Refuse to Answer", then skip to instruction before Q446.***

Q419. Can you tell me [Response to Q418]'s nickname if they have one? Interviewer, please record the nickname.

-----

***If Q405 is greater than 7 then skip to Q420***

***If not, then skip to instruction before Q422.***

Q420. So far you named [Response to Q406], [Response to Q408], [Response to Q410], [Response to Q412], [Response to Q414], [Response to Q416] and [Response to Q418]. What is the name of the 8th person?

-----

***If Q420 is equal to "Refuse to Answer", then skip to instruction before Q446.***

Q421. Can you tell me [Response to Q420]'s nickname if they have one? Interviewer, please record the nickname.

-----

***If Q405 is greater than 8 then skip to Q422***

***If not, then skip to instruction before Q424.***

Q422. So far you named [Response to Q406], [Response to Q408], [Response to Q410], [Response to Q412], [Response to Q414], [Response to Q416], [Response to Q418] and [Response to Q420]. What is the name of the 9th person?

-----

***If Q422 is equal to "Refuse to Answer", then skip to instruction before Q446.***

Q423. Can you tell me [Response to Q422]'s nickname if they have one? Interviewer, please record the nickname.

-----

***If Q405 is greater than 9 then skip to Q424***

***If not, then skip to instruction before Q426.***

Q424. So far you named [Response to Q406], [Response to Q408], [Response to Q410], [Response to Q412], [Response to Q414], [Response to Q416], [Response to Q418], [Response to Q420], and [Response to Q422]. What is the name of the 10th person.

-----

***If Q424 is equal to "Refuse to Answer", then skip to instruction before Q446.***

Q425. Can you tell me [Response to Q424]'s nickname if they have one? Interviewer, please record the nickname.

-----

***If Q405 is greater than 10 then skip to Q426***

***If not, then skip to instruction before Q428.***

Q426. So far you named [Response to Q406], [Response to Q408], [Response to Q410], [Response to Q412], [Response to Q414], [Response to Q416], [Response to Q418], [Response to Q420], [Response to Q422], and [Response to Q424]. What is the name of the 11th person?

-----

***If Q426 is equal to "Refuse to Answer", then skip to instruction before Q446.***

Q427. Can you tell me [Response to Q426]'s nickname if they have one? Interviewer, please record the nickname.

-----

***If Q405 is greater than 11 then skip to Q428***

***If not, then skip to instruction before Q430.***

Q428. So far you named [Response to Q406], [Response to Q408], [Response to Q410], [Response to Q412], [Response to Q414], [Response to Q416], [Response to Q418], [Response to Q420], [Response to Q422], [Response to Q424] and [Response to Q426]. What is the name of the 12th person?

-----

***If Q428 is equal to "Refuse to Answer", then skip to instruction before Q446.***

Q429. Can you tell me [Response to Q428]'s nickname if they have one? Interviewer, please record the nickname.

-----

***If Q405 is greater than 12 then skip to Q430***

***If not, then skip to instruction before Q432.***

Q430. So far you named [Response to Q406], [Response to Q408], [Response to Q410], [Response to Q412], [Response to Q414], [Response to Q416], [Response to Q418], [Response to Q420], [Response to Q422], [Response to Q424], [Response to Q426], and [Response to Q428]. What is the name of the 13th person?

-----

***If Q430 is equal to "Refuse to Answer", then skip to instruction before Q446.***

Q431. Can you tell me [Response to Q430]'s nickname if they have one? Interviewer, please record the nickname.

-----

***If Q405 is greater than 13 then skip to Q432***

***If not, then skip to instruction before Q434.***

Q432. So far you named [Response to Q406], [Response to Q408], [Response to Q410], [Response to Q412], [Response to Q414], [Response to Q416], [Response to Q418], [Response to Q420], [Response to Q422], [Response to Q424], [Response to Q426], [Response to Q428] and [Response to Q430]. What is the name of the 14th person?

-----

***If Q432 is equal to "Refuse to Answer", then skip to instruction before Q446.***

Q433. Can you tell me [Response to Q432]'s nickname if they have one? Interviewer, please record the nickname.

-----

***If Q405 is greater than 14 then skip to Q434***

***If not, then skip to instruction before Q436.***

Q434. So far you named [Response to Q406], [Response to Q408], [Response to Q410], [Response to Q412], [Response to Q414], [Response to Q416], [Response to Q418], [Response to Q420], [Response to Q422], [Response to Q424], [Response to Q426], [Response to Q428], [Response to Q430] and [Response to Q432]. What is the name of the 15th person?

-----

***If Q434 is equal to "Refuse to Answer", then skip to instruction before Q446.***

Q435. Can you tell me [Response to Q434]'s nickname if they have one? Interviewer, please record the nickname.

-----

***If Q405 is greater than 15 then skip to Q436***

***If not, then skip to instruction before Q438.***

Q436. So far you named [Response to Q406], [Response to Q408], [Response to Q410], [Response to Q412], [Response to Q414], [Response to Q416], [Response to Q418], [Response to Q420], [Response to Q422], [Response to Q424], [Response to Q426], [Response to Q428], [Response to Q430], [Response to Q432] and [Response to Q434]. What is the name of the 16th person?

-----

***If Q436 is equal to "Refuse to Answer", then skip to instruction before Q446.***

Q437. Can you tell me [Response to Q436]'s nickname if they have one? Interviewer, please record the nickname.

-----

***If Q405 is greater than 16 then skip to Q438***

***If not, then skip to instruction before Q440.***

Q438. So far you named [Response to Q406], [Response to Q408], [Response to Q410], [Response to Q412], [Response to Q414], [Response to Q416], [Response to Q418], [Response to Q420], [Response to Q422], [Response to Q424], [Response to Q426], [Response to Q428], [Response to Q430], [Response to Q432], [Response to Q434] and [Response to Q436]. What is the name of the 17th person?

-----

***If Q438 is equal to "Refuse to Answer", then skip to instruction before Q446.***

Q439. Can you tell me [Response to Q438]'s nickname if they have one? Interviewer, please record the nickname.

-----

***If Q405 is greater than 17 then skip to Q440***

***If not, then skip to instruction before Q442.***

Q440. So far you named [Response to Q406], [Response to Q408], [Response to Q410], [Response to Q412], [Response to Q414], [Response to Q416], [Response to Q418], [Response to Q420], [Response to Q422], [Response to Q424], [Response to Q426], [Response to Q428], [Response to Q430], [Response to Q432], [Response to Q434], [Response to Q436] and [Response to Q438]. What is the name of the 18th person?

-----

***If Q440 is equal to "Refuse to Answer", then skip to instruction before Q446.***

Q441. Can you tell me [Response to Q440]'s nickname if they have one? Interviewer, please record the nickname.

-----

***If Q405 is greater than 18 then skip to Q442***

***If not, then skip to instruction before Q444.***

Q442. So far you named [Response to Q406], [Response to Q408], [Response to Q410], [Response to Q412], [Response to Q414], [Response to Q416], [Response to Q418], [Response to Q420], [Response to Q422], [Response to Q424], [Response to Q426], [Response to Q428], [Response to Q430], [Response to Q432], [Response to Q434], [Response to Q436], [Response to Q438], and [Response to Q440]. What is the name of the 19th person?

-----

***If Q442 is equal to "Refuse to Answer", then skip to instruction before Q446.***

Q443. Can you tell me [Response to Q442]'s nickname if they have one? Interviewer, please record the nickname.

-----

***If Q405 is greater than 19 then skip to Q444***

***If not, then skip to instruction before Q446.***

Q444. So far you named [Response to Q406], [Response to Q408], [Response to Q410], [Response to Q412], [Response to Q414], [Response to Q416], [Response to Q418], [Response to Q420], [Response to Q422], [Response to Q424], [Response to Q426], [Response to Q428], [Response to Q430], [Response to Q432], [Response to Q434], [Response to Q436], [Response to Q438], [Response to Q440], and [Response to Q442]. What is the name of the 20th person?

-----

***If Q444 is equal to "Refuse to Answer", then skip to instruction before Q446.***

Q445. Can you tell me [Response to Q444]'s nickname if they have one? Interviewer, please record the nickname.

-----

***READ: Now I will ask questions about the first five people you have listed. These questions are about basic information. Keep in mind that everything you tell me is confidential and that we will protect your privacy and the privacy of the people that you mention.***

***If Q405 is greater than 0 and Q406 is not equal to "Refuse to Answer" then skip to Q446***

***If not, then skip to instruction before Q468.***





- Q449. Is [Response to Q406]? (Choose one)
- |   |                            |
|---|----------------------------|
| 1 | Spouse                     |
| 2 | Current romantic partner   |
| 3 | Ex-romantic partner        |
| 4 | Sex partner (non-romantic) |
| 5 | Other                      |
| 8 | Refuse to Answer           |

*If Q449 is equal to 5 then skip to Q450*

*If not, then skip to instruction before Q451.*

Q450. Please specify your relationship with [Response to Q406].

---

*If Q448 is equal to 2 then skip to Q451*

*If not, then skip to instruction before Q452.*

- Q451. Is [Response to Q406]? (Choose one)
- |   |                  |
|---|------------------|
| 1 | Best Friend      |
| 2 | Close Friend     |
| 3 | Friend           |
| 4 | Acquaintance     |
| 5 | Other            |
| 8 | Refuse to Answer |

*If Q451 is equal to 5 then skip to Q452*

*If not, then skip to instruction before Q453.*

Q452. Please specify your relationship with [Response to Q406].

---

*If Q448 is equal to 3 then skip to Q453*

***If not, then skip to instruction before Q454.***

- Q453. Is [Response to Q406]? (Choose one)
- |   |                    |
|---|--------------------|
| 1 | Neighbor           |
| 2 | Housemate/Roommate |
| 3 | Other              |
| 8 | Refuse to Answer   |

***If Q453 is equal to 3 then skip to Q454***

***If not, then skip to instruction before Q455.***

Q454. Please specify your relationship with [Response to Q406].

-----

***If Q448 is equal to 4 then skip to Q455***

***If not, then skip to instruction before Q456.***

- Q455. Is [Response to Q406]? (Choose one)
- |   |                  |
|---|------------------|
| 1 | Co-worker        |
| 2 | Boss             |
| 3 | Other            |
| 8 | Refuse to Answer |

***If Q455 is equal to 3 then skip to Q456***

***If not, then skip to instruction before Q457.***

Q456. Please specify your relationship with [Response to Q406].

-----

***If Q448 is equal to 5 then skip to Q457***

***If not, then skip to instruction before Q458.***

- Q457. Is [Response to Q406]? (Choose one)
- |   |                                              |
|---|----------------------------------------------|
| 1 | Parent [Mother/Father/Step-parent]           |
| 2 | Child                                        |
| 3 | Sibling [Brother/sister/step-brother/sister] |
| 4 | Brother-in-law or Sister-in-law              |
| 5 | Other Relative                               |
| 8 | Refuse to Answer                             |

***If Q457 is equal to 5 then skip to Q458***

***If not, then skip to instruction before Q459.***

Q458. Please specify your relationship with [Response to Q406].

---

***If Q448 is equal to 6 then skip to Q459***

***If not, then skip to instruction before Q460.***

- Q459. Is [Response to Q406]? (Choose one)
- |   |                                                   |
|---|---------------------------------------------------|
| 1 | Bartender                                         |
| 2 | Drug Dealer                                       |
| 3 | Someone who injects others for a fee or for drugs |
| 4 | Drug Selling Client (someone you sell drugs to)   |
| 5 | Drinking Buddy                                    |
| 6 | Someone you use drugs with                        |
| 7 | Other                                             |
| 8 | Refuse to Answer                                  |

***If Q459 is equal to 7 then skip to Q460***

***If not, then skip to instruction before Q461.***

Q460. Please specify your relationship with [Response to Q406].

-----

*If Q448 is equal to 7 then skip to Q461*

*If not, then skip to instruction before Q462.*

- Q461. Is [Response to Q406]? (Choose one)
- |   |                                |
|---|--------------------------------|
| 1 | Religious or Spiritual Advisor |
| 2 | Teacher or Other Educator      |
| 3 | Medical Professional           |
| 4 | Mental Health Professional     |
| 5 | Other                          |
| 8 | Refuse to Answer               |

*If Q461 is equal to 5 then skip to Q462*

*If not, then skip to instruction before Q463.*

Q462. Please specify your relationship with [Response to Q406]?

-----

*If Q448 is not equal to 5 and Q448 is not equal to 8 then skip to Q463*

*If not, then skip to Q464.*

Q463. Did you have vaginal or anal sex with [Response to Q406] in the previous 6 months?

- |   |                  |
|---|------------------|
| 1 | Yes              |
| 0 | No               |
| 8 | Refuse to Answer |

Q464. Is [Response to Q406] male, female, transgender, non-binary or other? (Choose one)

- 1 Male
- 2 Female
- 3 Transgender woman (i.e., male to female)
- 4 Transgender man (i.e., female to male)
- 5 Non-binary / genderqueer / gender fluid / agender
- 6 Another identity not listed
- 8 Refuse to Answer

Q465. Please tell me how often you communicate with [Response to Q406] (in person, phone, email, and on social media, like Facebook, count) (Choose one)

- 01 Every Day
- 02 Several times a week
- 03 Once a week
- 04 Once every two weeks
- 05 Once a month
- 06 A couple of times a year
- 07 Once a year
- 08 Less than once a year
- 98 Refuse to Answer

Q466. How close do you feel to [Response to Q406]? (Choose one)

- 1 Very close
- 2 Somewhat close
- 3 Not very close
- 4 Not close at all
- 8 Refuse to Answer



Q470. What is your relationship to [Response to Q408]? (Choose one)

- 1 Romantic or sex partner
- 2 Friend
- 3 Neighbor or housemate
- 4 Co-worker or boss
- 5 Family - relative by blood or marriage
- 6 Drug or Alcohol Related
- 7 Other
- 8 Refuse to Answer

***If Q470 is equal to 1 then skip to Q471***

***If not, then skip to instruction before Q472.***

Q471. Is [Response to Q408]? (Choose one)

- 1 Spouse
- 2 Current romantic partner
- 3 Ex-romantic partner
- 4 Sex partner (non-romantic)
- 5 Other
- 8 Refuse to Answer

***If Q471 is equal to 5 then skip to Q472***

***If not, then skip to instruction before Q473.***

Q472. Please specify your relationship with [Response to Q408].

-----

***If Q470 is equal to 2 then skip to Q473***

***If not, then skip to instruction before Q474.***



- Q473. Is [Response to Q408]? (Choose one)
- |   |                  |
|---|------------------|
| 1 | Best Friend      |
| 2 | Close Friend     |
| 3 | Friend           |
| 4 | Acquaintance     |
| 5 | Other            |
| 8 | Refuse to Answer |

*If Q473 is equal to 5 then skip to Q474*

*If not, then skip to instruction before Q475.*

Q474. Please specify your relationship with [Response to Q408].

---

*If Q470 is equal to 3 then skip to Q475*

*If not, then skip to instruction before Q476.*

- Q475. Is [Response to Q408]? (Choose one)
- |   |                    |
|---|--------------------|
| 1 | Neighbor           |
| 2 | Housemate/Roommate |
| 3 | Other              |
| 8 | Refuse to Answer   |

*If Q475 is equal to 3 then skip to Q476*

*If not, then skip to instruction before Q477.*

Q476. Please specify your relationship with [Response to Q408].

---

*If Q470 is equal to 4 then skip to Q477*

*If not, then skip to instruction before Q478.*

- Q477. Is [Response to Q408]? (Choose one)
- |   |                  |
|---|------------------|
| 1 | Co-worker        |
| 2 | Boss             |
| 3 | Other            |
| 8 | Refuse to Answer |

*If Q477 is equal to 3 then skip to Q478*

*If not, then skip to instruction before Q479.*

Q478. Please specify your relationship with [Response to Q408].

-----

*If Q470 is equal to 5 then skip to Q479*

*If not, then skip to instruction before Q480.*

- Q479. Is [Response to Q408]? (Choose one)
- |   |                                              |
|---|----------------------------------------------|
| 1 | Parent [Mother/Father/Step-parent]           |
| 2 | Child                                        |
| 3 | Sibling [Brother/sister/step-brother/sister] |
| 4 | Brother-in-law or Sister-in-law              |
| 5 | Other Relative                               |
| 8 | Refuse to Answer                             |

*If Q479 is equal to 5 then skip to Q480*

*If not, then skip to instruction before Q481.*

Q480. Please specify your relationship with [Response to Q408].

-----

*If Q470 is equal to 6 then skip to Q481*

*If not, then skip to instruction before Q482.*

- Q481. Is [Response to Q408]? (Choose one)
- |   |                                                   |
|---|---------------------------------------------------|
| 1 | Bartender                                         |
| 2 | Drug Dealer                                       |
| 3 | Someone who injects others for a fee or for drugs |
| 4 | Drug Selling Client (someone you sell drugs to)   |
| 5 | Drinking Buddy                                    |
| 6 | Someone you use drugs with                        |
| 7 | Other                                             |
| 8 | Refuse to Answer                                  |

*If Q481 is equal to 7 then skip to Q482*

*If not, then skip to instruction before Q483.*

Q482. Please specify your relationship with [Response to Q408].

---

*If Q470 is equal to 7 then skip to Q483*

*If not, then skip to instruction before Q484.*

- Q483. Is [Response to Q408]? (Choose one)
- |   |                                |
|---|--------------------------------|
| 1 | Religious or Spiritual Advisor |
| 2 | Teacher or Other Educator      |
| 3 | Medical Professional           |
| 4 | Mental Health Professional     |
| 5 | Other                          |
| 8 | Refuse to Answer               |

*If Q483 is equal to 5 then skip to Q484*

*If not, then skip to instruction before Q485.*

Q484. Please specify your relationship with [Response to Q408]?

-----

***If Q470 is not equal to 5 and Q470 is not equal to 8 then skip to Q485***

***If not, then skip to Q486.***

Q485. Did you have vaginal or anal sex with [Response to Q408] in the previous 6 months?

- 1 Yes
- 0 No
- 8 Refuse to Answer

Q486. Is [Response to Q408] male, female, transgender, non-binary or other? (Choose one)

- 1 Male
- 2 Female
- 3 Transgender woman (i.e., male to female)
- 4 Transgender man (i.e., female to male)
- 5 Non-binary / genderqueer / gender fluid / agender
- 6 Another identity not listed
- 8 Refuse to Answer

Q487. Please tell me how often you communicate with [Response to Q408] (in person, phone, email, and on social media, like Facebook, count) (Choose one)

- 01 Every Day
- 02 Several times a week
- 03 Once a week
- 04 Once every two weeks
- 05 Once a month
- 06 A couple of times a year
- 07 Once a year
- 08 Less than once a year
- 98 Refuse to Answer

Q488. How close do you feel to [Response to Q408]? (Choose one)

- 1 Very close
- 2 Somewhat close
- 3 Not very close
- 4 Not close at all
- 8 Refuse to Answer

Q489. How long have you felt this close to [Response to Q408]? \_\_\_

- \_\_\_ YEARS
- \_\_\_ MONTHS
- \_\_\_ DAYS
- 97 Don't Know (Years)
- 98 Refuse to Answer (Years)

***If Q489 is greater than Q469 and Q469 is not equal to 97 and Q469 is not equal to 98 then READ: "That response is greater than the times you said you know & [NAME2]. Please check the response." and skip to Q489.***

***If Q405 is greater than 2 and Q410 is not equal to "Refuse to Answer" and Q410 is not equal to "skipped" then skip to Q490***



- Q493. Is [Response to Q410]? (Choose one)
- |   |                            |
|---|----------------------------|
| 1 | Spouse                     |
| 2 | Current romantic partner   |
| 3 | Ex-romantic partner        |
| 4 | Sex partner (non-romantic) |
| 5 | Other                      |
| 8 | Refuse to Answer           |

*If Q493 is equal to 5 then skip to Q494*

*If not, then skip to instruction before Q495.*

Q494. Please specify your relationship with [Response to Q410].

---

*If Q492 is equal to 2 then skip to Q495*

*If not, then skip to instruction before Q496.*

- Q495. Is [Response to Q410]? (Choose one)
- |   |                  |
|---|------------------|
| 1 | Best Friend      |
| 2 | Close Friend     |
| 3 | Friend           |
| 4 | Acquaintance     |
| 5 | Other            |
| 8 | Refuse to Answer |

*If Q495 is equal to 5 then skip to Q496*

*If not, then skip to instruction before Q497.*

Q496. Please specify your relationship with [Response to Q410].

---

*If Q492 is equal to 3 then skip to Q497*

***If not, then skip to instruction before Q498.***

- Q497. Is [Response to Q410]? (Choose one)
- |   |                    |
|---|--------------------|
| 1 | Neighbor           |
| 2 | Housemate/Roommate |
| 3 | Other              |
| 8 | Refuse to Answer   |

***If Q497 is equal to 3 then skip to Q498***

***If not, then skip to instruction before Q499.***

Q498. Please specify your relationship with [Response to Q410].

-----

***If Q492 is equal to 4 then skip to Q499***

***If not, then skip to instruction before Q500.***

- Q499. Is [Response to Q410]? (Choose one)
- |   |                  |
|---|------------------|
| 1 | Co-worker        |
| 2 | Boss             |
| 3 | Other            |
| 8 | Refuse to Answer |

***If Q499 is equal to 3 then skip to Q500***

***If not, then skip to instruction before Q501.***

Q500. Please specify your relationship with [Response to Q410].

-----

***If Q492 is equal to 5 then skip to Q501***

***If not, then skip to instruction before Q502.***



- Q501. Is [Response to Q410]? (Choose one)
- |   |                                              |
|---|----------------------------------------------|
| 1 | Parent [Mother/Father/Step-parent]           |
| 2 | Child                                        |
| 3 | Sibling [Brother/sister/step-brother/sister] |
| 4 | Brother-in-law or Sister-in-law              |
| 5 | Other Relative                               |
| 8 | Refuse to Answer                             |

*If Q501 is equal to 5 then skip to Q502*

*If not, then skip to instruction before Q503.*

Q502. Please specify your relationship with [Response to Q410].

---

*If Q492 is equal to 6 then skip to Q503*

*If not, then skip to instruction before Q504.*

- Q503. Is [Response to Q410]? (Choose one)
- |   |                                                   |
|---|---------------------------------------------------|
| 1 | Bartender                                         |
| 2 | Drug Dealer                                       |
| 3 | Someone who injects others for a fee or for drugs |
| 4 | Drug Selling Client (someone you sell drugs to)   |
| 5 | Drinking Buddy                                    |
| 6 | Someone you use drugs with                        |
| 7 | Other                                             |
| 8 | Refuse to Answer                                  |

*If Q503 is equal to 7 then skip to Q504*

*If not, then skip to instruction before Q505.*

Q504. Please specify your relationship with [Response to Q410].

-----

*If Q492 is equal to 7 then skip to Q505*

*If not, then skip to instruction before Q506.*

- Q505. Is [Response to Q410]? (Choose one)
- |   |                                |
|---|--------------------------------|
| 1 | Religious or Spiritual Advisor |
| 2 | Teacher or Other Educator      |
| 3 | Medical Professional           |
| 4 | Mental Health Professional     |
| 5 | Other                          |
| 8 | Refuse to Answer               |

*If Q505 is equal to 5 then skip to Q506*

*If not, then skip to instruction before Q507.*

Q506. Please specify your relationship with [Response to Q410]?

-----

*If Q492 is not equal to 5 and Q492 is not equal to 8 then skip to Q507*

*If not, then skip to Q508.*

Q507. Did you have vaginal or anal sex with [Response to Q410] in the previous 6 months?

- |   |                  |
|---|------------------|
| 1 | Yes              |
| 0 | No               |
| 8 | Refuse to Answer |

Q508. Is [Response to Q410] male, female, transgender, non-binary or other? (Choose one)

- 1 Male
- 2 Female
- 3 Transgender woman (i.e., male to female)
- 4 Transgender man (i.e., female to male)
- 5 Non-binary / genderqueer / gender fluid / agender
- 6 Another identity not listed
- 8 Refuse to Answer

Q509. Please tell me how often you communicate with [Response to Q410] (in person, phone, email, and on social media, like Facebook, count) (Choose one)

- 01 Every Day
- 02 Several times a week
- 03 Once a week
- 04 Once every two weeks
- 05 Once a month
- 06 A couple of times a year
- 07 Once a year
- 08 Less than once a year
- 98 Refuse to Answer

Q510. How close do you feel to [Response to Q410]? (Choose one)

- 1 Very close
- 2 Somewhat close
- 3 Not very close
- 4 Not close at all
- 8 Refuse to Answer



Q514. What is your relationship to [Response to Q412]? (Choose one)

- 1 Romantic or sex partner
- 2 Friend
- 3 Neighbor or housemate
- 4 Co-worker or boss
- 5 Family - relative by blood or marriage
- 6 Drug or Alcohol Related
- 7 Other
- 8 Refuse to Answer

*If Q514 is equal to 1 then skip to Q515*

*If not, then skip to instruction before Q516.*

Q515. Is [Response to Q412]? (Choose one)

- 1 Spouse
- 2 Current romantic partner
- 3 Ex-romantic partner
- 4 Sex partner (non-romantic)
- 5 Other
- 8 Refuse to Answer

*If Q515 is equal to 5 then skip to Q516*

*If not, then skip to instruction before Q517.*

Q516. Please specify your relationship with [Response to Q412].

-----

*If Q514 is equal to 2 then skip to Q517*

*If not, then skip to instruction before Q518.*

- Q517. Is [Response to Q412]? (Choose one)
- |   |                  |
|---|------------------|
| 1 | Best Friend      |
| 2 | Close Friend     |
| 3 | Friend           |
| 4 | Acquaintance     |
| 5 | Other            |
| 8 | Refuse to Answer |

*If Q517 is equal to 5 then skip to Q518*

*If not, then skip to instruction before Q519.*

Q518. Please specify your relationship with [Response to Q412].

---

*If Q514 is equal to 3 then skip to Q519*

*If not, then skip to instruction before Q520.*

- Q519. Is [Response to Q412]? (Choose one)
- |   |                    |
|---|--------------------|
| 1 | Neighbor           |
| 2 | Housemate/Roommate |
| 3 | Other              |
| 8 | Refuse to Answer   |

*If Q519 is equal to 3 then skip to Q520*

*If not, then skip to instruction before Q521.*

Q520. Please specify your relationship with [Response to Q412].

---

*If Q514 is equal to 4 then skip to Q521*

*If not, then skip to instruction before Q522.*

- Q521. Is [Response to Q412]? (Choose one)
- |   |                  |
|---|------------------|
| 1 | Co-worker        |
| 2 | Boss             |
| 3 | Other            |
| 8 | Refuse to Answer |

*If Q521 is equal to 3 then skip to Q522*

*If not, then skip to instruction before Q523.*

Q522. Please specify your relationship with [Response to Q412].

-----

*If Q514 is equal to 5 then skip to Q523*

*If not, then skip to instruction before Q524.*

- Q523. Is [Response to Q412]? (Choose one)
- |   |                                              |
|---|----------------------------------------------|
| 1 | Parent [Mother/Father/Step-parent]           |
| 2 | Child                                        |
| 3 | Sibling [Brother/sister/step-brother/sister] |
| 4 | Brother-in-law or Sister-in-law              |
| 5 | Other Relative                               |
| 8 | Refuse to Answer                             |

*If Q523 is equal to 5 then skip to Q524*

*If not, then skip to instruction before Q525.*

Q524. Please specify your relationship with [Response to Q412].

-----

*If Q514 is equal to 6 then skip to Q525*

*If not, then skip to instruction before Q526.*

- Q525. Is [Response to Q412]? (Choose one)
- 1 Bartender
  - 2 Drug Dealer
  - 3 Someone who injects others for a fee or for drugs
  - 4 Drug Selling Client (someone you sell drugs to)
  - 5 Drinking Buddy
  - 6 Someone you use drugs with
  - 7 Other
  - 8 Refuse to Answer

*If Q525 is equal to 7 then skip to Q526*

*If not, then skip to instruction before Q527.*

Q526. Please specify your relationship with [Response to Q412].

-----

*If Q514 is equal to 7 then skip to Q527*

*If not, then skip to instruction before Q528.*

- Q527. Is [Response to Q412]? (Choose one)
- 1 Religious or Spiritual Advisor
  - 2 Teacher or Other Educator
  - 3 Medical Professional
  - 4 Mental Health Professional
  - 5 Other
  - 8 Refuse to Answer

*If Q527 is equal to 5 then skip to Q528*

*If not, then skip to instruction before Q529.*



Q528. Please specify your relationship with [Response to Q412]?

-----

***If Q514 is not equal to 5 and Q514 is not equal to 8 then skip to Q529***

***If not, then skip to Q530.***

Q529. Did you have vaginal or anal sex with [Response to Q412] in the previous 6 months?

- 1 Yes
- 0 No
- 8 Refuse to Answer

Q530. Is [Response to Q412] male, female, transgender, non-binary or other? (Choose one)

- 1 Male
- 2 Female
- 3 Transgender woman (i.e., male to female)
- 4 Transgender man (i.e., female to male)
- 5 Non-binary / genderqueer / gender fluid / agender
- 6 Another identity not listed
- 8 Refuse to Answer

Q531. Please tell me how often you communicate with [Response to Q412] (in person, phone, email, and on social media, like Facebook, count) (Choose one)

- 01 Every Day
- 02 Several times a week
- 03 Once a week
- 04 Once every two weeks
- 05 Once a month
- 06 A couple of times a year
- 07 Once a year
- 08 Less than once a year
- 98 Refuse to Answer

Q532. How close do you feel to [Response to Q412]? (Choose one)

- 1 Very close
- 2 Somewhat close
- 3 Not very close
- 4 Not close at all
- 8 Refuse to Answer

Q533. How long have you felt this close to [Response to Q412]? \_\_\_

- \_\_\_ YEARS
- \_\_\_ MONTHS
- \_\_\_ DAYS
- 97 Don't Know (Years)
- 98 Refuse to Answer (Years)

***If Q533 is greater than Q513 and Q513 is not equal to 97 and Q513 is not equal to 98 then READ: "That response is greater than the times you said you know &[NAME4]. Please check the response." and skip to Q533.***

***If Q405 is greater than 4 and Q414 is not equal to "Refuse to Answer" and Q414 is not equal to "skipped" then skip to Q534***



- Q537. Is [Response to Q414]? (Choose one)
- |   |                            |
|---|----------------------------|
| 1 | Spouse                     |
| 2 | Current romantic partner   |
| 3 | Ex-romantic partner        |
| 4 | Sex partner (non-romantic) |
| 5 | Other                      |
| 8 | Refuse to Answer           |

*If Q537 is equal to 5 then skip to Q538*

*If not, then skip to instruction before Q539.*

Q538. Please specify your relationship with [Response to Q414].

---

*If Q536 is equal to 2 then skip to Q539*

*If not, then skip to instruction before Q540.*

- Q539. Is [Response to Q414]? (Choose one)
- |   |                  |
|---|------------------|
| 1 | Best Friend      |
| 2 | Close Friend     |
| 3 | Friend           |
| 4 | Acquaintance     |
| 5 | Other            |
| 8 | Refuse to Answer |

*If Q539 is equal to 5 then skip to Q540*

*If not, then skip to instruction before Q541.*

Q540. Please specify your relationship with [Response to Q414].

---

*If Q536 is equal to 3 then skip to Q541*

***If not, then skip to instruction before Q542.***

- Q541. Is [Response to Q414]? (Choose one)
- |   |                    |
|---|--------------------|
| 1 | Neighbor           |
| 2 | Housemate/Roommate |
| 3 | Other              |
| 8 | Refuse to Answer   |

***If Q541 is equal to 3 then skip to Q542***

***If not, then skip to instruction before Q543.***

Q542. Please specify your relationship with [Response to Q414].

-----

***If Q536 is equal to 4 then skip to Q543***

***If not, then skip to instruction before Q544.***

- Q543. Is [Response to Q414]? (Choose one)
- |   |                  |
|---|------------------|
| 1 | Co-worker        |
| 2 | Boss             |
| 3 | Other            |
| 8 | Refuse to Answer |

***If Q543 is equal to 3 then skip to Q544***

***If not, then skip to instruction before Q545.***

Q544. Please specify your relationship with [Response to Q414].

-----

***If Q536 is equal to 5 then skip to Q545***

***If not, then skip to instruction before Q546.***

- Q545. Is [Response to Q414]? (Choose one)
- |   |                                              |
|---|----------------------------------------------|
| 1 | Parent [Mother/Father/Step-parent]           |
| 2 | Child                                        |
| 3 | Sibling [Brother/sister/step-brother/sister] |
| 4 | Brother-in-law or Sister-in-law              |
| 5 | Other Relative                               |
| 8 | Refuse to Answer                             |

*If Q545 is equal to 5 then skip to Q546*

*If not, then skip to instruction before Q547.*

Q546. Please specify your relationship with [Response to Q414].

---

*If Q536 is equal to 6 then skip to Q547*

*If not, then skip to instruction before Q548.*

- Q547. Is [Response to Q414]? (Choose one)
- |   |                                                   |
|---|---------------------------------------------------|
| 1 | Bartender                                         |
| 2 | Drug Dealer                                       |
| 3 | Someone who injects others for a fee or for drugs |
| 4 | Drug Selling Client (someone you sell drugs to)   |
| 5 | Drinking Buddy                                    |
| 6 | Someone you use drugs with                        |
| 7 | Other                                             |
| 8 | Refuse to Answer                                  |

*If Q547 is equal to 7 then skip to Q548*

*If not, then skip to instruction before Q549.*

Q548. Please specify your relationship with [Response to Q414].

-----

***If Q536 is equal to 7 then skip to Q549***

***If not, then skip to instruction before Q550.***

- Q549. Is [Response to Q414]? (Choose one)
- |   |                                |
|---|--------------------------------|
| 1 | Religious or Spiritual Advisor |
| 2 | Teacher or Other Educator      |
| 3 | Medical Professional           |
| 4 | Mental Health Professional     |
| 5 | Other                          |
| 8 | Refuse to Answer               |

***If Q549 is equal to 5 then skip to Q550***

***If not, then skip to instruction before Q551.***

Q550. Please specify your relationship with [Response to Q414]?

-----

***If Q536 is not equal to 5 and Q536 is not equal to 8 then skip to Q551***

***If not, then skip to Q552.***

Q551. Did you have vaginal or anal sex with [Response to Q414] in the previous 6 months?

- |   |                  |
|---|------------------|
| 1 | Yes              |
| 0 | No               |
| 8 | Refuse to Answer |

Q552. Is [Response to Q414] male, female, transgender, non-binary or other? (Choose one)

- 1 Male
- 2 Female
- 3 Transgender woman (i.e., male to female)
- 4 Transgender man (i.e., female to male)
- 5 Non-binary / genderqueer / gender fluid / agender
- 6 Another identity not listed
- 8 Refuse to Answer

Q553. Please tell me how often you communicate with [Response to Q414] (in person, phone, email, and on social media, like Facebook, count) (Choose one)

- 01 Every Day
- 02 Several times a week
- 03 Once a week
- 04 Once every two weeks
- 05 Once a month
- 06 A couple of times a year
- 07 Once a year
- 08 Less than once a year
- 98 Refuse to Answer

Q554. How close do you feel to [Response to Q414]? (Choose one)

- 1 Very close
- 2 Somewhat close
- 3 Not very close
- 4 Not close at all
- 8 Refuse to Answer





Q556. How frequently do [Response to Q406] and [Response to Q408] communicate with each other, that could be by talking, texting, or chatting? (Choose one)

- 01 Several times a day
- 02 Every day
- 03 Several times a week
- 04 Once a week
- 05 Once every two weeks
- 06 Once a month
- 07 A couple of times a year
- 08 Once a year
- 09 Never
- 97 Don't Know
- 98 Refuse to Answer

***If Q405 is greater than 2 and Q406 is not equal to "Refuse to Answer" and Q406 is not equal to "skipped" and Q410 is not equal to "Refuse to Answer" and Q410 is not equal to "skipped" then skip to Q557***

***If not, then skip to instruction before Q558.***

Q557. How frequently do [Response to Q406] and [Response to Q410] communicate with each other, that could be by talking, texting, or chatting? (Choose one)

- 01 Several times a day
- 02 Every day
- 03 Several times a week
- 04 Once a week
- 05 Once every two weeks
- 06 Once a month
- 07 A couple of times a year
- 08 Once a year
- 09 Never
- 97 Don't Know
- 98 Refuse to Answer

***If Q405 is greater than 3 and Q406 is not equal to "Refuse to Answer" and Q406 is not equal to "skipped" and Q412 is not equal to "Refuse to Answer" and Q412 is not equal to "skipped" then skip to Q558***

***If not, then skip to instruction before Q559.***

Q558. How frequently do [Response to Q406] and [Response to Q412] communicate with each other, that could be by talking, texting, or chatting? (Choose one)

- 01 Several times a day
- 02 Every day
- 03 Several times a week
- 04 Once a week
- 05 Once every two weeks
- 06 Once a month
- 07 A couple of times a year
- 08 Once a year
- 09 Never
- 97 Don't Know
- 98 Refuse to Answer

***If Q405 is greater than 4 and Q406 is not equal to "Refuse to Answer" and Q406 is not equal to "skipped" and Q414 is not equal to "Refuse to Answer" and Q414 is not equal to "skipped" then skip to Q559***

***If not, then skip to instruction before Q560.***

Q559. How frequently do [Response to Q406] and [Response to Q414] communicate with each other, that could be by talking, texting, or chatting? (Choose one)

- 01 Several times a day
- 02 Every day
- 03 Several times a week
- 04 Once a week
- 05 Once every two weeks
- 06 Once a month
- 07 A couple of times a year
- 08 Once a year
- 09 Never
- 97 Don't Know
- 98 Refuse to Answer

***If Q405 is greater than 2 and Q408 is not equal to "Refuse to Answer" and Q408 is not equal to "skipped" and Q410 is not equal to "Refuse to Answer" and Q410 is not equal to "skipped" then skip to Q560***

***If not, then skip to instruction before Q561.***

Q560. How frequently do [Response to Q408] and [Response to Q410] communicate with each other, that could be by talking, texting, or chatting? (Choose one)

- 01 Several times a day
- 02 Every day
- 03 Several times a week
- 04 Once a week
- 05 Once every two weeks
- 06 Once a month
- 07 A couple of times a year
- 08 Once a year
- 09 Never
- 97 Don't Know
- 98 Refuse to Answer

***If Q405 is greater than 3 and Q408 is not equal to "Refuse to Answer" and Q408 is not equal to "skipped" and Q412 is not equal to "Refuse to Answer" and Q412 is not equal to "skipped" then skip to Q561***

***If not, then skip to instruction before Q562.***

Q561. How frequently do [Response to Q408] and [Response to Q412] communicate with each other, that could be by talking, texting, or chatting? (Choose one)

- 01 Several times a day
- 02 Every day
- 03 Several times a week
- 04 Once a week
- 05 Once every two weeks
- 06 Once a month
- 07 A couple of times a year
- 08 Once a year
- 09 Never
- 97 Don't Know
- 98 Refuse to Answer

***If Q405 is greater than 4 and Q408 is not equal to "Refuse to Answer" and Q408 is not equal to "skipped" and Q414 is not equal to "Refuse to Answer" and Q414 is not equal to "skipped" then skip to Q562***

***If not, then skip to instruction before Q563.***

Q562. How frequently do [Response to Q408] and [Response to Q414] communicate with each other, that could be by talking, texting, or chatting? (Choose one)

- 01 Several times a day
- 02 Every day
- 03 Several times a week
- 04 Once a week
- 05 Once every two weeks
- 06 Once a month
- 07 A couple of times a year
- 08 Once a year
- 09 Never
- 97 Don't Know
- 98 Refuse to Answer

***If Q405 is greater than 3 and Q410 is not equal to "Refuse to Answer" and Q410 is not equal to "skipped" and Q412 is not equal to "Refuse to Answer" and Q412 is not equal to "skipped" then skip to Q563***

***If not, then skip to instruction before Q564.***



Q563. How frequently do [Response to Q410] and [Response to Q412] communicate with each other, that could be by talking, texting, or chatting? (Choose one)

- 01 Several times a day
- 02 Every day
- 03 Several times a week
- 04 Once a week
- 05 Once every two weeks
- 06 Once a month
- 07 A couple of times a year
- 08 Once a year
- 09 Never
- 97 Don't Know
- 98 Refuse to Answer

***If Q405 is greater than 4 and Q410 is not equal to "Refuse to Answer" and Q410 is not equal to "skipped" and Q414 is not equal to "Refuse to Answer" and Q414 is not equal to "skipped" then skip to Q564***

***If not, then skip to instruction before Q565.***

Q564. How frequently do [Response to Q410] and [Response to Q414] communicate with each other, that could be by talking, texting, or chatting? (Choose one)

- 01 Several times a day
- 02 Every day
- 03 Several times a week
- 04 Once a week
- 05 Once every two weeks
- 06 Once a month
- 07 A couple of times a year
- 08 Once a year
- 09 Never
- 97 Don't Know
- 98 Refuse to Answer

***If Q405 is greater than 4 and Q412 is not equal to "Refuse to Answer" and Q412 is not equal to "skipped" and Q414 is not equal to "Refuse to Answer" and Q414 is not equal to "skipped" then skip to Q565***

***If not, then skip to instruction before Q566.***

Q565. How frequently do [Response to Q412] and [Response to Q414] communicate with each other, that could be by talking, texting, or chatting? (Choose one)

- 01 Several times a day
- 02 Every day
- 03 Several times a week
- 04 Once a week
- 05 Once every two weeks
- 06 Once a month
- 07 A couple of times a year
- 08 Once a year
- 09 Never
- 97 Don't Know
- 98 Refuse to Answer

***If Q405 is greater than 0 and Q406 is not equal to "Refuse to Answer" and Q406 is not equal to "skipped" then skip to Q566***

***If not, then skip to instruction before Q590.***

Q566. How often does [Response to Q406] use drugs? (Choose one)

- 01 Every day
- 02 Several times a week
- 03 Once a week
- 04 Once every two weeks
- 05 Once a month
- 06 A couple of times a year
- 07 Once a year
- 08 Less than once a year
- 09 Never
- 10 Used to use drugs, but does not at the present time
- 97 Don't Know
- 98 Refuse to Answer

***If Q566 is not less than 1 and Q566 is not greater than 8 then skip to Q567***

***If not, then skip to instruction before Q568.***

Q567. Which of these does [Response to Q406] use? (Check all that apply) (Check all that apply)

- Alcohol
- Marijuana
- Heroin by itself
- Crack cocaine by itself
- Cocaine powder by itself
- Heroin and cocaine together (speedball)
- Methamphetamine/crystal by itself
- Methamphetamine/crystal and heroin together
- China White by itself
- China White and heroin together
- China White and crystal/meth together
- PCP
- Hallucinogenic drugs like acid, LSD, peyote, mescaline, mushrooms
- Inhalants (for example, glue, gasoline, paint thinner, agua celeste or other chemicals)
- Tranquilizers without a prescription (Rivotril, Diazepam, Valium, Ativan or Restoril)
- OxyContin without a prescription
- Other prescription opioids without a prescription (Vicodin, Darvon, Percocet)
- Barbiturates without a prescription (Amytal, Nembutal, and Seconal)
- Another drug or combination that was not already mentioned
- Don't Know
- Refuse to Answer

***If Q567S is equal to 1 then skip to Q568***

***If not, then skip to instruction before Q569.***

Q568. Please specify what other drugs or combination of drugs [Response to Q406] uses.

-----

***If Q566 is not less than 1 and Q566 is not greater than 8 then skip to Q569***

***If not, then skip to instruction before Q570.***

Q569. Does [Response to Q406] use drugs by injection, by noninjection, or sometimes one and sometimes the other? (Choose one)

- 1 Only uses drugs by injection
- 2 Only uses drugs by non-injection
- 3 Sometimes uses drugs by injection and sometimes by non-injection
- 7 Don't Know
- 8 Refuse to Answer

***If Q569 is equal to 1 or Q569 is equal to 3 then skip to Q570***

***If not, then skip to instruction before Q571.***

Q570. Have you ever used a needle, water, cooker or cotton that had already been used by [Response to Q406]?

- 1 Yes
- 0 No
- 8 Refuse to Answer

***If Q566 is not equal to 9 and Q566 is not equal to 97 and Q566 is not equal to 98 then skip to Q571***

***If not, then skip to instruction before Q572.***

Q571. Has [Response to Q406] ever offered to share or encouraged you to use drugs?

- 1 Yes
- 0 No
- 8 Refuse to Answer

*If Q571 is equal to 1 then skip to Q572*

*If not, then skip to instruction before Q573.*

Q572. Which of these has [Response to Q406] offered to share or encouraged you to use? (Check all that apply)  
(Check all that apply)

- Alcohol
- Marijuana
- Heroin by itself
- Crack cocaine by itself
- Cocaine powder by itself
- Heroin and cocaine together (speedball)
- Methamphetamine/crystal by itself
- Methamphetamine/crystal and heroin together
- China White by itself
- China White and heroin together
- China White and crystal/meth together
- PCP
- Hallucinogenic drugs like acid, LSD, peyote, mescaline, mushrooms
- Inhalants (for example, glue, gasoline, paint thinner, agua celeste or other chemicals)
- Tranquilizers without a prescription (Rivotril, Diazepam, Valium, Ativan or Restoril)
- OxyContin without a prescription
- Other prescription opioids without a prescription (Vicodin, Darvon, Percocet)
- Barbiturates without a prescription (Amytal, Nembutal, and Seconal)
- Another drug or combination that was not already mentioned
- Refuse to Answer

***If Q572S is equal to 1 then skip to Q573***

***If not, then skip to Q574.***



Q573. Please specify which of drugs has [Response to Q406] offered to share or encouraged you to use?

-----

|                                                                       |   |                  |
|-----------------------------------------------------------------------|---|------------------|
| Q574. Has [Response to Q406] ever encouraged you to stop using drugs? | 1 | Yes              |
|                                                                       | 0 | No               |
|                                                                       | 8 | Refuse to Answer |

***If Q574 is equal to 1 then skip to Q575***

***If not, then skip to instruction before Q576.***

Q575. Has [Response to Q406] ever encouraged you to specifically stop using drugs by injection?

|   |                  |
|---|------------------|
| 1 | Yes              |
| 0 | No               |
| 7 | Don't Know       |
| 8 | Refuse to Answer |

***If Q566 is not equal to 9 and Q566 is not equal to 97 and Q566 is not equal to 98 then skip to Q576***

***If not, then skip to instruction before Q577.***

Q576. How old was [Response to Q406] when they first started using drugs?

|     |                  |
|-----|------------------|
| ___ | years old        |
| 97  | Don't Know       |
| 98  | Refuse to Answer |

***If Q566 is not equal to 9 and Q566 is not equal to 10 and Q566 is not equal to 97 and Q566 is not equal to 98 then skip to Q577***

***If not, then skip to Q578.***

Q577. Consider [Response to Q406] usual daily drug use, does [Response to Q406] ever use double the amount or mix with other drugs?

- 1 Yes
- 0 No
- 7 Don't Know
- 8 Refuse to Answer

Q578. Has [Response to Q406] ever lived on the street, in a shelter, in a Single Room Occupancy hotel (SRO), temporarily with friends/relatives, in a car, or squatted?

- 1 Yes
- 0 No
- 7 Don't Know
- 8 Refuse to Answer

Q579. Where does [Response to Q406] currently live? (Choose one)

- 1 San Diego County
- 2 Tijuana
- 3 Other
- 7 Don't Know
- 8 Refuse to Answer

***If Q579 is equal to 3 then skip to Q580***

***If not, then skip to instruction before Q581.***

Q580. Please specify where [Response to Q406] lives.

-----

***If Q579 is equal to 1 and Q566 is not equal to 9 and Q566 is not equal to 97 and Q566 is not equal to 98 then skip to Q581***

***If not, then skip to instruction before Q582.***

Q581. **In the past 6 months**, had [Response to Q406] traveled to Mexico to buy or obtain drugs?

- 1 Yes
- 0 No
- 7 Don't Know
- 8 Refuse to Answer

*If Q581 is equal to 1 then skip to Q582*

*If not, then skip to instruction before Q583.*

Q582. Which types of drugs did [Response to Q406] buy in Mexico? (Check all that apply) (Check all that apply)

- Marijuana
- Heroin
- Crack cocaine by itself
- Cocaine (powder) by itself
- Heroin and cocaine together (speedball)
- Methamphetamine/crystal by itself
- Methamphetamine/crystal and heroin together
- China White by itself
- China White and heroin together
- China White and crystal/meth together
- PCP
- Hallucinogenic drugs like acid, LSD, peyote, mescaline, mushrooms
- Inhalants (for example, glue, gasoline, paint thinner, agua celeste or other chemicals)
- Tranquilizers without a prescription (Rivotril, Diazepam, Valium, Ativan or Restoril)
- OxyContin without a prescription
- Other prescription opioids without a prescription (Vicodin, Darvon, Percocet)
- Barbiturates without a prescription (Amytal, Nembutal, and Seconal)
- Another drug or combination that was not already mentioned
- Don't Know
- Refuse to Answer

***If Q582R is equal to 1 then skip to Q583***

***If not, then skip to instruction before Q584.***

Q583. Please specify which types of drugs did [Response to Q406] buy in Mexico?

-----

*If Q579 is equal to 1 then skip to Q584*

*If not, then skip to instruction before Q585.*

Q584. In the past 6 months, had [Response to Q406] traveled to Mexico to pay money or drugs for sex?

- 1 Yes
- 0 No
- 7 Don't Know
- 8 Refuse to Answer

*If Q579 is equal to 2 and Q566 is not equal to 9 and Q566 is not equal to 97 and Q566 is not equal to 98 then skip to Q585*

*If not, then skip to instruction before Q586.*

Q585. In the past 6 months, had [Response to Q406] traveled to the United states to buy or obtain drugs?

- 1 Yes
- 0 No
- 7 Don't Know
- 8 Refuse to Answer

*If Q585 is equal to 1 then skip to Q586*

*If not, then skip to instruction before Q587.*

Q586. Which types of drugs did [Response to Q406] buy in the US? (Check all that apply) (Check all that apply)

- Marijuana
- Heroin
- Crack cocaine by itself
- Cocaine (powder) by itself
- Heroin and cocaine together (speedball)
- Methamphetamine/crystal by itself
- Methamphetamine/crystal and heroin together
- China White by itself
- China White and heroin together
- China White and crystal/meth together
- PCP
- Hallucinogenic drugs like acid, LSD, peyote, mescaline, mushrooms
- Inhalants (for example, glue, gasoline, paint thinner, agua celeste or other chemicals)
- Tranquilizers without a prescription (Rivotril, Diazepam, Valium, Ativan or Restoril)
- OxyContin without a prescription
- Other prescription opioids without a prescription (Vicodin, Darvon, Percocet)
- Barbiturates without a prescription (Amytal, Nembutal, and Seconal)
- Another drug or combination that was not already mentioned
- Don't Know
- Refuse to Answer

***If Q586R is equal to 1 then skip to Q587***

***If not, then skip to instruction before Q588.***

Q587. Please specify which types of drugs did [Response to Q406] buy in the US?

-----

*If Q579 is equal to 2 then skip to Q588*

*If not, then skip to Q589.*

Q588. **In the past 6 months**, has [Response to Q406] had sex for money or drugs with someone from the United States?

- 1 Yes
- 0 No
- 7 Don't Know
- 8 Refuse to Answer

Q589. Has [Response to Q406] ever been detained or arrested?

- 1 Yes
- 0 No
- 7 Don't Know
- 8 Refuse to Answer

*If Q405 is greater than 1 and Q408 is not equal to "Refuse to Answer" and Q408 is not equal to "skipped" then skip to Q590*

*If not, then skip to instruction before Q614.*

Q590. How often does [Response to Q408] use drugs? (Choose one)

- 01 Every day
- 02 Several times a week
- 03 Once a week
- 04 Once every two weeks
- 05 Once a month
- 06 A couple of times a year
- 07 Once a year
- 08 Less than once a year
- 09 Never
- 10 Used to use drugs, but does not at the present time
- 97 Don't Know
- 98 Refuse to Answer

***If Q590 is not less than 1 and Q590 is not greater than 8 then skip to Q591***

***If not, then skip to instruction before Q592.***



Q591. Which of these does [Response to Q408] use? (Check all that apply) (Check all that apply)

- Alcohol
- Marijuana
- Heroin by itself
- Crack cocaine by itself
- Cocaine powder by itself
- Heroin and cocaine together (speedball)
- Methamphetamine/crystal by itself
- Methamphetamine/crystal and heroin together
- China White by itself
- China White and heroin together
- China White and crystal/meth together
- PCP
- Hallucinogenic drugs like acid, LSD, peyote, mescaline, mushrooms
- Inhalants (for example, glue, gasoline, paint thinner, agua celeste or other chemicals)
- Tranquilizers without a prescription (Rivotril, Diazepam, Valium, Ativan or Restoril)
- OxyContin without a prescription
- Other prescription opioids without a prescription (Vicodin, Darvon, Percocet)
- Barbiturates without a prescription (Amytal, Nembutal, and Seconal)
- Another drug or combination that was not already mentioned
- Don't Know
- Refuse to Answer

***If Q591S is equal to 1 then skip to Q592***

***If not, then skip to instruction before Q593.***

Q592. Please specify what other drugs or combination of drugs [Response to Q408] uses.

-----

***If Q590 is not less than 1 and Q590 is not greater than 8 then skip to Q593***

***If not, then skip to instruction before Q594.***

Q593. Does [Response to Q408] use drugs by injection, by noninjection, or sometimes one and sometimes the other? (Choose one)

- 1 Only uses drugs by injection
- 2 Only uses drugs by non-injection
- 3 Sometimes uses drugs by injection and sometimes by non-injection
- 7 Don't Know
- 8 Refuse to Answer

***If Q593 is equal to 1 or Q593 is equal to 3 then skip to Q594***

***If not, then skip to instruction before Q595.***

Q594. Have you ever used a needle, water, cooker or cotton that had already been used by [Response to Q408]?

- 1 Yes
- 0 No
- 8 Refuse to Answer

***If Q590 is not equal to 9 and Q590 is not equal to 97 and Q590 is not equal to 98 then skip to Q595***

***If not, then skip to instruction before Q596.***

Q595. Has [Response to Q408] ever offered to share or encouraged you to use drugs?

- 1 Yes
- 0 No
- 8 Refuse to Answer

*If Q595 is equal to 1 then skip to Q596*

*If not, then skip to instruction before Q597.*

Q596. Which of these has [Response to Q408] offered to share or encouraged you to use? (Check all that apply)  
(Check all that apply)

- Alcohol
- Marijuana
- Heroin by itself
- Crack cocaine by itself
- Cocaine powder by itself
- Heroin and cocaine together (speedball)
- Methamphetamine/crystal by itself
- Methamphetamine/crystal and heroin together
- China White by itself
- China White and heroin together
- China White and crystal/meth together
- PCP
- Hallucinogenic drugs like acid, LSD, peyote, mescaline, mushrooms
- Inhalants (for example, glue, gasoline, paint thinner, agua celeste or other chemicals)
- Tranquilizers without a prescription (Rivotril, Diazepam, Valium, Ativan or Restoril)
- OxyContin without a prescription
- Other prescription opioids without a prescription (Vicodin, Darvon, Percocet)
- Barbiturates without a prescription (Amytal, Nembutal, and Seconal)
- Another drug or combination that was not already mentioned
- Refuse to Answer

***If Q596S is equal to 1 then skip to Q597***

***If not, then skip to Q598.***

Q597. Please specify which of drugs has [Response to Q408] offered to share or encouraged you to use?

-----

|                                                                       |   |                  |
|-----------------------------------------------------------------------|---|------------------|
| Q598. Has [Response to Q408] ever encouraged you to stop using drugs? | 1 | Yes              |
|                                                                       | 0 | No               |
|                                                                       | 8 | Refuse to Answer |

***If Q598 is equal to 1 then skip to Q599***

***If not, then skip to instruction before Q600.***

Q599. Has [Response to Q408] ever encouraged you to specifically stop using drugs by injection?

|   |                  |
|---|------------------|
| 1 | Yes              |
| 0 | No               |
| 7 | Don't Know       |
| 8 | Refuse to Answer |

***If Q590 is not equal to 9 and Q590 is not equal to 97 and Q590 is not equal to 98 then skip to Q600***

***If not, then skip to instruction before Q601.***

Q600. How old was [Response to Q408] when they first started using drugs?

|     |                  |
|-----|------------------|
| ___ | years old        |
| 97  | Don't Know       |
| 98  | Refuse to Answer |

***If Q590 is not equal to 9 and Q590 is not equal to 10 and Q590 is not equal to 97 and Q590 is not equal to 98 then skip to Q601***

***If not, then skip to Q602.***

Q601. Consider [Response to Q408] usual daily drug use, does [Response to Q408] ever use double the amount or mix with other drugs?

- 1 Yes
- 0 No
- 7 Don't Know
- 8 Refuse to Answer

Q602. Has [Response to Q408] ever lived on the street, in a shelter, in a Single Room Occupancy hotel (SRO), temporarily with friends/relatives, in a car, or squatted?

- 1 Yes
- 0 No
- 7 Don't Know
- 8 Refuse to Answer

Q603. Where does [Response to Q408] currently live? (Choose one)

- 1 San Diego County
- 2 Tijuana
- 3 Other
- 7 Don't Know
- 8 Refuse to Answer

*If Q603 is equal to 3 then skip to Q604*

*If not, then skip to instruction before Q605.*

Q604. Please specify where [Response to Q408] lives.

-----

*If Q603 is equal to 1 and Q590 is not equal to 9 and Q590 is not equal to 97 and Q590 is not equal to 98 then skip to Q605*

*If not, then skip to instruction before Q606.*

Q605. **In the past 6 months**, had [Response to Q408] traveled to Mexico to buy or obtain drugs?

- 1 Yes
- 0 No
- 7 Don't Know
- 8 Refuse to Answer

*If Q605 is equal to 1 then skip to Q606*

*If not, then skip to instruction before Q607.*

Q606. Which types of drugs did [Response to Q408] buy in Mexico? (Check all that apply) (Check all that apply)

- Marijuana
- Heroin
- Crack cocaine by itself
- Cocaine (powder) by itself
- Heroin and cocaine together (speedball)
- Methamphetamine/crystal by itself
- Methamphetamine/crystal and heroin together
- China White by itself
- China White and heroin together
- China White and crystal/meth together
- PCP
- Hallucinogenic drugs like acid, LSD, peyote, mescaline, mushrooms
- Inhalants (for example, glue, gasoline, paint thinner, agua celeste or other chemicals)
- Tranquilizers without a prescription (Rivotril, Diazepam, Valium, Ativan or Restoril)
- OxyContin without a prescription
- Other prescription opioids without a prescription (Vicodin, Darvon, Percocet)
- Barbiturates without a prescription (Amytal, Nembutal, and Seconal)
- Another drug or combination that was not already mentioned
- Don't Know
- Refuse to Answer

***If Q606R is equal to 1 then skip to Q607***

***If not, then skip to instruction before Q608.***



Q607. Please specify which types of drugs did [Response to Q408] buy in Mexico?

-----

*If Q603 is equal to 1 then skip to Q608*

*If not, then skip to instruction before Q609.*

Q608. In the past 6 months, had [Response to Q408] traveled to Mexico to pay money or drugs for sex?

- 1 Yes
- 0 No
- 7 Don't Know
- 8 Refuse to Answer

*If Q603 is equal to 2 and Q590 is not equal to 9 and Q590 is not equal to 97 and Q590 is not equal to 98 then skip to Q609*

*If not, then skip to instruction before Q610.*

Q609. In the past 6 months, had [Response to Q408] traveled to the United states to buy or obtain drugs?

- 1 Yes
- 0 No
- 7 Don't Know
- 8 Refuse to Answer

*If Q609 is equal to 1 then skip to Q610*

*If not, then skip to instruction before Q611.*

Q610. Which types of drugs did [Response to Q408] buy in the US? (Check all that apply) (Check all that apply)

- Marijuana
- Heroin
- Crack cocaine by itself
- Cocaine (powder) by itself
- Heroin and cocaine together (speedball)
- Methamphetamine/crystal by itself
- Methamphetamine/crystal and heroin together
- China White by itself
- China White and heroin together
- China White and crystal/meth together
- PCP
- Hallucinogenic drugs like acid, LSD, peyote, mescaline, mushrooms
- Inhalants (for example, glue, gasoline, paint thinner, agua celeste or other chemicals)
- Tranquilizers without a prescription (Rivotril, Diazepam, Valium, Ativan or Restoril)
- OxyContin without a prescription
- Other prescription opioids without a prescription (Vicodin, Darvon, Percocet)
- Barbiturates without a prescription (Amytal, Nembutal, and Seconal)
- Another drug or combination that was not already mentioned
- Don't Know
- Refuse to Answer

***If Q610R is equal to 1 then skip to Q611***

***If not, then skip to instruction before Q612.***

Q611. Please specify which types of drugs did [Response to Q408] buy in the US?

-----

*If Q603 is equal to 2 then skip to Q612*

*If not, then skip to Q613.*

Q612. **In the past 6 months**, has [Response to Q408] had sex for money or drugs with someone from the United States?

- 1 Yes
- 0 No
- 7 Don't Know
- 8 Refuse to Answer

Q613. Has [Response to Q408] ever been detained or arrested?

- 1 Yes
- 0 No
- 7 Don't Know
- 8 Refuse to Answer

*If Q405 is greater than 2 and Q410 is not equal to "Refuse to Answer" and Q410 is not equal to "skipped" then skip to Q614*

*If not, then skip to instruction before Q638.*

Q614. How often does [Response to Q410] use drugs? (Choose one)

- 01 Every day
- 02 Several times a week
- 03 Once a week
- 04 Once every two weeks
- 05 Once a month
- 06 A couple of times a year
- 07 Once a year
- 08 Less than once a year
- 09 Never
- 10 Used to use drugs, but does not at the present time
- 97 Don't Know
- 98 Refuse to Answer

***If Q614 is not less than 1 and Q614 is not greater than 8 then skip to Q615***

***If not, then skip to instruction before Q616.***

Q615. Which of these does [Response to Q410] use? (Check all that apply) (Check all that apply)

- Alcohol
- Marijuana
- Heroin by itself
- Crack cocaine by itself
- Cocaine powder by itself
- Heroin and cocaine together (speedball)
- Methamphetamine/crystal by itself
- Methamphetamine/crystal and heroin together
- China White by itself
- China White and heroin together
- China White and crystal/meth together
- PCP
- Hallucinogenic drugs like acid, LSD, peyote, mescaline, mushrooms
- Inhalants (for example, glue, gasoline, paint thinner, agua celeste or other chemicals)
- Tranquilizers without a prescription (Rivotril, Diazepam, Valium, Ativan or Restoril)
- OxyContin without a prescription
- Other prescription opioids without a prescription (Vicodin, Darvon, Percocet)
- Barbiturates without a prescription (Amytal, Nembutal, and Seconal)
- Another drug or combination that was not already mentioned
- Don't Know
- Refuse to Answer

***If Q615S is equal to 1 then skip to Q616***

***If not, then skip to instruction before Q617.***

Q616. Please specify what other drugs or combination of drugs [Response to Q410] uses.

-----

***If Q614 is not less than 1 and Q614 is not greater than 8 then skip to Q617***

***If not, then skip to instruction before Q618.***

Q617. Does [Response to Q410] use drugs by injection, by noninjection, or sometimes one and sometimes the other? (Choose one)

- 1 Only uses drugs by injection
- 2 Only uses drugs by non-injection
- 3 Sometimes uses drugs by injection and sometimes by non-injection
- 7 Don't Know
- 8 Refuse to Answer

***If Q617 is equal to 1 or Q617 is equal to 3 then skip to Q618***

***If not, then skip to instruction before Q619.***

Q618. Have you ever used a needle, water, cooker or cotton that had already been used by [Response to Q410]?

- 1 Yes
- 0 No
- 8 Refuse to Answer

***If Q614 is not equal to 9 and Q614 is not equal to 97 and Q614 is not equal to 98 then skip to Q619***

***If not, then skip to instruction before Q620.***

Q619. Has [Response to Q410] ever offered to share or encouraged you to use drugs?

- 1 Yes
- 0 No
- 8 Refuse to Answer

*If Q619 is equal to 1 then skip to Q620*

*If not, then skip to instruction before Q621.*

Q620. Which of these has [Response to Q410] offered to share or encouraged you to use? (Check all that apply)  
(Check all that apply)

- Alcohol
- Marijuana
- Heroin by itself
- Crack cocaine by itself
- Cocaine powder by itself
- Heroin and cocaine together (speedball)
- Methamphetamine/crystal by itself
- Methamphetamine/crystal and heroin together
- China White by itself
- China White and heroin together
- China White and crystal/meth together
- PCP
- Hallucinogenic drugs like acid, LSD, peyote, mescaline, mushrooms
- Inhalants (for example, glue, gasoline, paint thinner, agua celeste or other chemicals)
- Tranquilizers without a prescription (Rivotril, Diazepam, Valium, Ativan or Restoril)
- OxyContin without a prescription
- Other prescription opioids without a prescription (Vicodin, Darvon, Percocet)
- Barbiturates without a prescription (Amytal, Nembutal, and Seconal)
- Another drug or combination that was not already mentioned
- Refuse to Answer

***If Q620S is equal to 1 then skip to Q621***

***If not, then skip to Q622.***



Q621. Please specify which of drugs has [Response to Q410] offered to share or encouraged you to use?

-----

|                                                                       |   |                  |
|-----------------------------------------------------------------------|---|------------------|
| Q622. Has [Response to Q410] ever encouraged you to stop using drugs? | 1 | Yes              |
|                                                                       | 0 | No               |
|                                                                       | 8 | Refuse to Answer |

***If Q622 is equal to 1 then skip to Q623***

***If not, then skip to instruction before Q624.***

Q623. Has [Response to Q410] ever encouraged you to specifically stop using drugs by injection?

|   |                  |
|---|------------------|
| 1 | Yes              |
| 0 | No               |
| 7 | Don't Know       |
| 8 | Refuse to Answer |

***If Q614 is not equal to 9 and Q614 is not equal to 97 and Q614 is not equal to 98 then skip to Q624***

***If not, then skip to instruction before Q625.***

Q624. How old was [Response to Q410] when they first started using drugs?

|     |                  |
|-----|------------------|
| ___ | years old        |
| 97  | Don't Know       |
| 98  | Refuse to Answer |

***If Q614 is not equal to 9 and Q614 is not equal to 10 and Q614 is not equal to 97 and Q614 is not equal to 98 then skip to Q625***

***If not, then skip to Q626.***

Q625. Consider [Response to Q410] usual daily drug use, does [Response to Q410] ever use double the amount or mix with other drugs?

- 1 Yes
- 0 No
- 7 Don't Know
- 8 Refuse to Answer

Q626. Has [Response to Q410] ever lived on the street, in a shelter, in a Single Room Occupancy hotel (SRO), temporarily with friends/relatives, in a car, or squatted?

- 1 Yes
- 0 No
- 7 Don't Know
- 8 Refuse to Answer

Q627. Where does [Response to Q410] currently live? (Choose one)

- 1 San Diego County
- 2 Tijuana
- 3 Other
- 7 Don't Know
- 8 Refuse to Answer

***If Q627 is equal to 3 then skip to Q628***

***If not, then skip to instruction before Q629.***

Q628. Please specify where [Response to Q410] lives.

-----

***If Q627 is equal to 1 and Q614 is not equal to 9 and Q614 is not equal to 97 and Q614 is not equal to 98 then skip to Q629***

***If not, then skip to instruction before Q630.***

Q629. **In the past 6 months**, had [Response to Q410] traveled to Mexico to buy or obtain drugs?

- 1 Yes
- 0 No
- 7 Don't Know
- 8 Refuse to Answer

*If Q629 is equal to 1 then skip to Q630*

*If not, then skip to instruction before Q631.*

Q630. Which types of drugs did [Response to Q410] buy in Mexico? (Check all that apply) (Check all that apply)

- Marijuana
- Heroin
- Crack cocaine by itself
- Cocaine (powder) by itself
- Heroin and cocaine together (speedball)
- Methamphetamine/crystal by itself
- Methamphetamine/crystal and heroin together
- China White by itself
- China White and heroin together
- China White and crystal/meth together
- PCP
- Hallucinogenic drugs like acid, LSD, peyote, mescaline, mushrooms
- Inhalants (for example, glue, gasoline, paint thinner, agua celeste or other chemicals)
- Tranquilizers without a prescription (Rivotril, Diazepam, Valium, Ativan or Restoril)
- OxyContin without a prescription
- Other prescription opioids without a prescription (Vicodin, Darvon, Percocet)
- Barbiturates without a prescription (Amytal, Nembutal, and Seconal)
- Another drug or combination that was not already mentioned
- Don't Know
- Refuse to Answer

***If Q630R is equal to 1 then skip to Q631***

***If not, then skip to instruction before Q632.***

Q631. Please specify which types of drugs did [Response to Q410] buy in Mexico?

-----

*If Q627 is equal to 1 then skip to Q632*

*If not, then skip to instruction before Q633.*

Q632. In the past 6 months, had [Response to Q410] traveled to Mexico to pay money or drugs for sex?

- 1 Yes
- 0 No
- 7 Don't Know
- 8 Refuse to Answer

*If Q627 is equal to 2 and Q614 is not equal to 9 and Q614 is not equal to 97 and Q614 is not equal to 98 then skip to Q633*

*If not, then skip to instruction before Q634.*

Q633. In the past 6 months, had [Response to Q410] traveled to the United states to buy or obtain drugs?

- 1 Yes
- 0 No
- 7 Don't Know
- 8 Refuse to Answer

*If Q633 is equal to 1 then skip to Q634*

*If not, then skip to instruction before Q635.*

Q634. Which types of drugs did [Response to Q410] buy in the US? (Check all that apply) (Check all that apply)

- Marijuana
- Heroin
- Crack cocaine by itself
- Cocaine (powder) by itself
- Heroin and cocaine together (speedball)
- Methamphetamine/crystal by itself
- Methamphetamine/crystal and heroin together
- China White by itself
- China White and heroin together
- China White and crystal/meth together
- PCP
- Hallucinogenic drugs like acid, LSD, peyote, mescaline, mushrooms
- Inhalants (for example, glue, gasoline, paint thinner, agua celeste or other chemicals)
- Tranquilizers without a prescription (Rivotril, Diazepam, Valium, Ativan or Restoril)
- OxyContin without a prescription
- Other prescription opioids without a prescription (Vicodin, Darvon, Percocet)
- Barbiturates without a prescription (Amytal, Nembutal, and Seconal)
- Another drug or combination that was not already mentioned
- Don't Know
- Refuse to Answer

***If Q634R is equal to 1 then skip to Q635***

***If not, then skip to instruction before Q636.***

Q635. Please specify which types of drugs did [Response to Q410] buy in the US?

-----

*If Q627 is equal to 2 then skip to Q636*

*If not, then skip to Q637.*

Q636. **In the past 6 months**, has [Response to Q410] had sex for money or drugs with someone from the United States?

- 1 Yes
- 0 No
- 7 Don't Know
- 8 Refuse to Answer

Q637. Has [Response to Q410] ever been detained or arrested?

- 1 Yes
- 0 No
- 7 Don't Know
- 8 Refuse to Answer

*If Q405 is greater than 3 and Q412 is not equal to "Refuse to Answer" and Q412 is not equal to "skipped" then skip to Q638*

*If not, then skip to instruction before Q662.*

Q638. How often does [Response to Q412] use drugs? (Choose one)

- 01 Every day
- 02 Several times a week
- 03 Once a week
- 04 Once every two weeks
- 05 Once a month
- 06 A couple of times a year
- 07 Once a year
- 08 Less than once a year
- 09 Never
- 10 Used to use drugs, but does not at the present time
- 97 Don't Know
- 98 Refuse to Answer

***If Q638 is not less than 1 and Q638 is not greater than 8 then skip to Q639***

***If not, then skip to instruction before Q640.***



Q639. Which of these does [Response to Q412] use? (Check all that apply) (Check all that apply)

- Alcohol
- Marijuana
- Heroin by itself
- Crack cocaine by itself
- Cocaine powder by itself
- Heroin and cocaine together (speedball)
- Methamphetamine/crystal by itself
- Methamphetamine/crystal and heroin together
- China White by itself
- China White and heroin together
- China White and crystal/meth together
- PCP
- Hallucinogenic drugs like acid, LSD, peyote, mescaline, mushrooms
- Inhalants (for example, glue, gasoline, paint thinner, agua celeste or other chemicals)
- Tranquilizers without a prescription (Rivotril, Diazepam, Valium, Ativan or Restoril)
- OxyContin without a prescription
- Other prescription opioids without a prescription (Vicodin, Darvon, Percocet)
- Barbiturates without a prescription (Amytal, Nembutal, and Seconal)
- Another drug or combination that was not already mentioned
- Don't Know
- Refuse to Answer

***If Q639S is equal to 1 then skip to Q640***

***If not, then skip to instruction before Q641.***

Q640. Please specify what other drugs or combination of drugs [Response to Q412] uses.

-----

***If Q638 is not less than 1 and Q638 is not greater than 8 then skip to Q641***

***If not, then skip to instruction before Q642.***

Q641. Does [Response to Q412] use drugs by injection, by noninjection, or sometimes one and sometimes the other? (Choose one)

- 1 Only uses drugs by injection
- 2 Only uses drugs by non-injection
- 3 Sometimes uses drugs by injection and sometimes by non-injection
- 7 Don't Know
- 8 Refuse to Answer

***If Q641 is equal to 1 or Q641 is equal to 3 then skip to Q642***

***If not, then skip to instruction before Q643.***

Q642. Have you ever used a needle, water, cooker or cotton that had already been used by [Response to Q412]?

- 1 Yes
- 0 No
- 8 Refuse to Answer

***If Q638 is not equal to 9 and Q638 is not equal to 97 and Q638 is not equal to 98 then skip to Q643***

***If not, then skip to instruction before Q644.***

Q643. Has [Response to Q412] ever offered to share or encouraged you to use drugs?

- 1 Yes
- 0 No
- 8 Refuse to Answer

*If Q643 is equal to 1 then skip to Q644*

*If not, then skip to instruction before Q645.*

Q644. Which of these has [Response to Q412] offered to share or encouraged you to use? (Check all that apply)  
(Check all that apply)

- Alcohol
- Marijuana
- Heroin by itself
- Crack cocaine by itself
- Cocaine powder by itself
- Heroin and cocaine together (speedball)
- Methamphetamine/crystal by itself
- Methamphetamine/crystal and heroin together
- China White by itself
- China White and heroin together
- China White and crystal/meth together
- PCP
- Hallucinogenic drugs like acid, LSD, peyote, mescaline, mushrooms
- Inhalants (for example, glue, gasoline, paint thinner, agua celeste or other chemicals)
- Tranquilizers without a prescription (Rivotril, Diazepam, Valium, Ativan or Restoril)
- OxyContin without a prescription
- Other prescription opioids without a prescription (Vicodin, Darvon, Percocet)
- Barbiturates without a prescription (Amytal, Nembutal, and Seconal)
- Another drug or combination that was not already mentioned
- Refuse to Answer

***If Q644S is equal to 1 then skip to Q645***

***If not, then skip to Q646.***



Q649. Consider [Response to Q412] usual daily drug use, does [Response to Q412] ever use double the amount or mix with other drugs?

- 1 Yes
- 0 No
- 7 Don't Know
- 8 Refuse to Answer

Q650. Has [Response to Q412] ever lived on the street, in a shelter, in a Single Room Occupancy hotel (SRO), temporarily with friends/relatives, in a car, or squatted?

- 1 Yes
- 0 No
- 7 Don't Know
- 8 Refuse to Answer

Q651. Where does [Response to Q412] currently live? (Choose one)

- 1 San Diego County
- 2 Tijuana
- 3 Other
- 7 Don't Know
- 8 Refuse to Answer

*If Q651 is equal to 3 then skip to Q652*

*If not, then skip to instruction before Q653.*

Q652. Please specify where [Response to Q412] lives.

-----

*If Q651 is equal to 1 and Q638 is not equal to 9 and Q638 is not equal to 97 and Q638 is not equal to 98 then skip to Q653*

*If not, then skip to instruction before Q654.*

Q653. **In the past 6 months**, had [Response to Q412] traveled to Mexico to buy or obtain drugs?

- 1 Yes
- 0 No
- 7 Don't Know
- 8 Refuse to Answer

*If Q653 is equal to 1 then skip to Q654*

*If not, then skip to instruction before Q655.*

Q654. Which types of drugs did [Response to Q412] buy in Mexico? (Check all that apply) (Check all that apply)

- Marijuana
- Heroin
- Crack cocaine by itself
- Cocaine (powder) by itself
- Heroin and cocaine together (speedball)
- Methamphetamine/crystal by itself
- Methamphetamine/crystal and heroin together
- China White by itself
- China White and heroin together
- China White and crystal/meth together
- PCP
- Hallucinogenic drugs like acid, LSD, peyote, mescaline, mushrooms
- Inhalants (for example, glue, gasoline, paint thinner, agua celeste or other chemicals)
- Tranquilizers without a prescription (Rivotril, Diazepam, Valium, Ativan or Restoril)
- OxyContin without a prescription
- Other prescription opioids without a prescription (Vicodin, Darvon, Percocet)
- Barbiturates without a prescription (Amytal, Nembutal, and Seconal)
- Another drug or combination that was not already mentioned
- Don't Know
- Refuse to Answer

***If Q654R is equal to 1 then skip to Q655***

***If not, then skip to instruction before Q656.***



Q655. Please specify which types of drugs did [Response to Q412] buy in Mexico?

-----

*If Q651 is equal to 1 then skip to Q656*

*If not, then skip to instruction before Q657.*

Q656. In the past 6 months, had [Response to Q412] traveled to Mexico to pay money or drugs for sex?

- 1 Yes
- 0 No
- 7 Don't Know
- 8 Refuse to Answer

*If Q651 is equal to 2 and Q638 is not equal to 9 and Q638 is not equal to 97 and Q638 is not equal to 98 then skip to Q657*

*If not, then skip to instruction before Q658.*

Q657. In the past 6 months, had [Response to Q412] traveled to the United states to buy or obtain drugs?

- 1 Yes
- 0 No
- 7 Don't Know
- 8 Refuse to Answer

*If Q657 is equal to 1 then skip to Q658*

*If not, then skip to instruction before Q659.*

Q658. Which types of drugs did [Response to Q412] buy in the US? (Check all that apply) (Check all that apply)

- Marijuana
- Heroin
- Crack cocaine by itself
- Cocaine (powder) by itself
- Heroin and cocaine together (speedball)
- Methamphetamine/crystal by itself
- Methamphetamine/crystal and heroin together
- China White by itself
- China White and heroin together
- China White and crystal/meth together
- PCP
- Hallucinogenic drugs like acid, LSD, peyote, mescaline, mushrooms
- Inhalants (for example, glue, gasoline, paint thinner, agua celeste or other chemicals)
- Tranquilizers without a prescription (Rivotril, Diazepam, Valium, Ativan or Restoril)
- OxyContin without a prescription
- Other prescription opioids without a prescription (Vicodin, Darvon, Percocet)
- Barbiturates without a prescription (Amytal, Nembutal, and Seconal)
- Another drug or combination that was not already mentioned
- Don't Know
- Refuse to Answer

***If Q658R is equal to 1 then skip to Q659***

***If not, then skip to instruction before Q660.***

Q659. Please specify which types of drugs did [Response to Q412] buy in the US?

-----

*If Q651 is equal to 2 then skip to Q660*

*If not, then skip to Q661.*

Q660. **In the past 6 months**, has [Response to Q412] had sex for money or drugs with someone from the United States?

- 1 Yes
- 0 No
- 7 Don't Know
- 8 Refuse to Answer

Q661. Has [Response to Q412] ever been detained or arrested?

- 1 Yes
- 0 No
- 7 Don't Know
- 8 Refuse to Answer

*If Q405 is greater than 4 and Q414 is not equal to "Refuse to Answer" and Q414 is not equal to "skipped" then skip to Q662*

*If not, then skip to instruction before Q686.*

Q662. How often does [Response to Q414] use drugs? (Choose one)

- 01 Every day
- 02 Several times a week
- 03 Once a week
- 04 Once every two weeks
- 05 Once a month
- 06 A couple of times a year
- 07 Once a year
- 08 Less than once a year
- 09 Never
- 10 Used to use drugs, but does not at the present time
- 97 Don't Know
- 98 Refuse to Answer

***If Q662 is not less than 1 and Q662 is not greater than 8 then skip to Q663***

***If not, then skip to instruction before Q664.***

Q663. Which of these does [Response to Q414] use? (Check all that apply) (Check all that apply)

- Alcohol
- Marijuana
- Heroin by itself
- Crack cocaine by itself
- Cocaine powder by itself
- Heroin and cocaine together (speedball)
- Methamphetamine/crystal by itself
- Methamphetamine/crystal and heroin together
- China White by itself
- China White and heroin together
- China White and crystal/meth together
- PCP
- Hallucinogenic drugs like acid, LSD, peyote, mescaline, mushrooms
- Inhalants (for example, glue, gasoline, paint thinner, agua celeste or other chemicals)
- Tranquilizers without a prescription (Rivotril, Diazepam, Valium, Ativan or Restoril)
- OxyContin without a prescription
- Other prescription opioids without a prescription (Vicodin, Darvon, Percocet)
- Barbiturates without a prescription (Amytal, Nembutal, and Seconal)
- Another drug or combination that was not already mentioned
- Don't Know
- Refuse to Answer

***If Q663S is equal to 1 then skip to Q664***

***If not, then skip to instruction before Q665.***

Q664. Please specify what other drugs or combination of drugs [Response to Q414] uses.

-----

***If Q662 is not less than 1 and Q662 is not greater than 8 then skip to Q665***

***If not, then skip to instruction before Q666.***

Q665. Does [Response to Q414] use drugs by injection, by noninjection, or sometimes one and sometimes the other? (Choose one)

- 1 Only uses drugs by injection
- 2 Only uses drugs by non-injection
- 3 Sometimes uses drugs by injection and sometimes by non-injection
- 7 Don't Know
- 8 Refuse to Answer

***If Q665 is equal to 1 or Q665 is equal to 3 then skip to Q666***

***If not, then skip to instruction before Q667.***

Q666. Have you ever used a needle, water, cooker or cotton that had already been used by [Response to Q414]?

- 1 Yes
- 0 No
- 8 Refuse to Answer

***If Q662 is not equal to 9 and Q662 is not equal to 97 and Q662 is not equal to 98 then skip to Q667***

***If not, then skip to instruction before Q668.***

Q667. Has [Response to Q414] ever offered to share or encouraged you to use drugs?

- 1 Yes
- 0 No
- 8 Refuse to Answer

*If Q667 is equal to 1 then skip to Q668*

*If not, then skip to instruction before Q669.*

Q668. Which of these has [Response to Q414] offered to share or encouraged you to use? (Check all that apply)  
(Check all that apply)

- Alcohol
- Marijuana
- Heroin by itself
- Crack cocaine by itself
- Cocaine powder by itself
- Heroin and cocaine together (speedball)
- Methamphetamine/crystal by itself
- Methamphetamine/crystal and heroin together
- China White by itself
- China White and heroin together
- China White and crystal/meth together
- PCP
- Hallucinogenic drugs like acid, LSD, peyote, mescaline, mushrooms
- Inhalants (for example, glue, gasoline, paint thinner, agua celeste or other chemicals)
- Tranquilizers without a prescription (Rivotril, Diazepam, Valium, Ativan or Restoril)
- OxyContin without a prescription
- Other prescription opioids without a prescription (Vicodin, Darvon, Percocet)
- Barbiturates without a prescription (Amytal, Nembutal, and Seconal)
- Another drug or combination that was not already mentioned
- Refuse to Answer

***If Q668S is equal to 1 then skip to Q669***

***If not, then skip to Q670.***





Q673. Consider [Response to Q414] usual daily drug use, does [Response to Q414] ever use double the amount or mix with other drugs?

- 1 Yes
- 0 No
- 7 Don't Know
- 8 Refuse to Answer

Q674. Has [Response to Q414] ever lived on the street, in a shelter, in a Single Room Occupancy hotel (SRO), temporarily with friends/relatives, in a car, or squatted?

- 1 Yes
- 0 No
- 7 Don't Know
- 8 Refuse to Answer

Q675. Where does [Response to Q414] currently live? (Choose one)

- 1 San Diego County
- 2 Tijuana
- 3 Other
- 7 Don't Know
- 8 Refuse to Answer

***If Q675 is equal to 3 then skip to Q676***

***If not, then skip to instruction before Q677.***

Q676. Please specify where [Response to Q414] lives.

-----

***If Q675 is equal to 1 and Q662 is not equal to 9 and Q662 is not equal to 97 and Q662 is not equal to 98 then skip to Q677***

***If not, then skip to instruction before Q678.***

Q677. **In the past 6 months**, had [Response to Q414] traveled to Mexico to buy or obtain drugs?

- 1 Yes
- 0 No
- 7 Don't Know
- 8 Refuse to Answer

*If Q677 is equal to 1 then skip to Q678*

*If not, then skip to instruction before Q679.*

Q678. Which types of drugs did [Response to Q414] buy in Mexico? (Check all that apply) (Check all that apply)

- Marijuana
- Heroin
- Crack cocaine by itself
- Cocaine (powder) by itself
- Heroin and cocaine together (speedball)
- Methamphetamine/crystal by itself
- Methamphetamine/crystal and heroin together
- China White by itself
- China White and heroin together
- China White and crystal/meth together
- PCP
- Hallucinogenic drugs like acid, LSD, peyote, mescaline, mushrooms
- Inhalants (for example, glue, gasoline, paint thinner, agua celeste or other chemicals)
- Tranquilizers without a prescription (Rivotril, Diazepam, Valium, Ativan or Restoril)
- OxyContin without a prescription
- Other prescription opioids without a prescription (Vicodin, Darvon, Percocet)
- Barbiturates without a prescription (Amytal, Nembutal, and Seconal)
- Another drug or combination that was not already mentioned
- Don't Know
- Refuse to Answer

***If Q678R is equal to 1 then skip to Q679***

***If not, then skip to instruction before Q680.***

Q679. Please specify which types of drugs did [Response to Q414] buy in Mexico?

-----

*If Q675 is equal to 1 then skip to Q680*

*If not, then skip to instruction before Q681.*

Q680. In the past 6 months, had [Response to Q414] traveled to Mexico to pay money or drugs for sex?

- 1 Yes
- 0 No
- 7 Don't Know
- 8 Refuse to Answer

*If Q675 is equal to 2 and Q662 is not equal to 9 and Q662 is not equal to 97 and Q662 is not equal to 98 then skip to Q681*

*If not, then skip to instruction before Q682.*

Q681. In the past 6 months, had [Response to Q414] traveled to the United states to buy or obtain drugs?

- 1 Yes
- 0 No
- 7 Don't Know
- 8 Refuse to Answer

*If Q681 is equal to 1 then skip to Q682*

*If not, then skip to instruction before Q683.*

Q682. Which types of drugs did [Response to Q414] buy in the US? (Check all that apply) (Check all that apply)

- Marijuana
- Heroin
- Crack cocaine by itself
- Cocaine (powder) by itself
- Heroin and cocaine together (speedball)
- Methamphetamine/crystal by itself
- Methamphetamine/crystal and heroin together
- China White by itself
- China White and heroin together
- China White and crystal/meth together
- PCP
- Hallucinogenic drugs like acid, LSD, peyote, mescaline, mushrooms
- Inhalants (for example, glue, gasoline, paint thinner, agua celeste or other chemicals)
- Tranquilizers without a prescription (Rivotril, Diazepam, Valium, Ativan or Restoril)
- OxyContin without a prescription
- Other prescription opioids without a prescription (Vicodin, Darvon, Percocet)
- Barbiturates without a prescription (Amytal, Nembutal, and Seconal)
- Another drug or combination that was not already mentioned
- Don't Know
- Refuse to Answer

***If Q682R is equal to 1 then skip to Q683***

***If not, then skip to instruction before Q684.***

Q683. Please specify which types of drugs did [Response to Q414] buy in the US?

-----

*If Q675 is equal to 2 then skip to Q684*

*If not, then skip to Q685.*

Q684. **In the past 6 months**, has [Response to Q414] had sex for money or drugs with someone from the United States?

- 1 Yes
- 0 No
- 7 Don't Know
- 8 Refuse to Answer

Q685. Has [Response to Q414] ever been detained or arrested?

- 1 Yes
- 0 No
- 7 Don't Know
- 8 Refuse to Answer

CoV-2 SOCIAL NETWORK COMPONENT

READ: Now we are going to switch gears and talk about more recent times that you have spent time with other people. As before, we are trying to learn about how people are connected to one another and how those connections relate to preventing diseases, but now we will focus on CoV-2 infection. Having names and demographic information will help us see how people in this study are connected to one another, for example through mutual friends.

Please keep in mind that everything you tell me is confidential and that we will protect your privacy and the privacy of the people you mention. We will never at any time use this information to contact the people you tell us about.

READ: Please think about the following types of people you've had close contact with in the past 14 days: romantic or sex partners or spouse; other family-relatives by blood or marriage; close friends; roommates; neighbors; work related (co-workers, bosses, customers); classmates; drug or alcohol related; people who provide you a service; others (e.g., people you saw at community groups, religious services, sports or exercise classes, school, etc.)

We are interested in people you've had either: In person, non-physical contact with (within 6ft) that lasted over an hour OR Physical contact with.

We'll start by first listing their names (first, last, nickname). Feel free to look through your phone to jog your memory. This is important. We will never share the names you provide us. Only the researchers will have access to these names.

Q686. Let's start with the people from the category **Romantic or sex partners or spouse** that you had close contact with in the past 14 days (again by close contact, we mean either: non-physical contact with (within 6ft) that lasted over an hour **OR** Physical contact). How many of them have you had contact with? Next, we'll list their names (up to 5 names may be listed).

98 Refuse to Answer

If Q686 is greater than 0 then skip to Q687

If not, then skip to instruction before Q691.

Q687. **Romantic or sex partner or spouse:** Person #1 First Name

-----

Q688. **Romantic or sex partner or spouse:** Person #1 Last Name

-----

Q689. **Romantic or sex partner or spouse:** Person #1 Nick Name

-----









Q713. **Family Relative by Blood or Marriage:** Person #2 Last Name

-----

Q714. **Family Relative by Blood or Marriage:** Person #2 Nick Name

-----

|                                                                  |       |                  |
|------------------------------------------------------------------|-------|------------------|
| Q715. <b>Family Relative by Blood or Marriage:</b> Person #2 Age | __ __ | years old        |
|                                                                  | 97    | Don't Know       |
|                                                                  | 98    | Refuse to Answer |

*If Q707 is greater than 2 then skip to Q716*

*If not, then skip to instruction before Q720.*

Q716. **Family relative by blood or marriage:** Person #3 First Name

-----

Q717. **Family Relative by Blood or Marriage:** Person #3 Last Name

-----

Q718. **Family Relative by Blood or Marriage:** Person #3 Nick Name

-----

|                                                                  |       |                  |
|------------------------------------------------------------------|-------|------------------|
| Q719. <b>Family Relative by Blood or Marriage:</b> Person #3 Age | __ __ | years old        |
|                                                                  | 97    | Don't Know       |
|                                                                  | 98    | Refuse to Answer |

*If Q707 is greater than 3 then skip to Q720*

*If not, then skip to instruction before Q724.*

Q720. **Family relative by blood or marriage:** Person #4 First Name

-----



Q729. Next, we'll list their names (up to 5 names may be listed).  
**Close Friend:** Person #1 First Name

-----

Q730. **Close friend:** Person #1 Last Name

-----

Q731. **Close Friend:** Person #1 Nick Name

-----

|                                          |     |                  |
|------------------------------------------|-----|------------------|
| Q732. <b>Close Friend:</b> Person #1 Age | ___ | years old        |
|                                          | 97  | Don't Know       |
|                                          | 98  | Refuse to Answer |

*If Q728 is greater than 1 then skip to Q733*

*If not, then skip to instruction before Q737.*

Q733. **Close Friend:** Person #2 First Name

-----

Q734. **Close friend:** Person #2 Last Name

-----

Q735. **Close Friend:** Person #2 Nick Name

-----

|                                          |     |                  |
|------------------------------------------|-----|------------------|
| Q736. <b>Close Friend:</b> Person #2 Age | ___ | years old        |
|                                          | 97  | Don't Know       |
|                                          | 98  | Refuse to Answer |

*If Q728 is greater than 2 then skip to Q737*

*If not, then skip to instruction before Q741.*

Q737. **Close Friend:** Person #3 First Name

-----

Q738. **Close friend:** Person #3 Last Name

-----

Q739. **Close Friend:** Person #3 Nick Name

-----

Q740. **Close Friend:** Person #3 Age

|     |                  |
|-----|------------------|
| ___ | years old        |
| 97  | Don't Know       |
| 98  | Refuse to Answer |

*If Q728 is greater than 3 then skip to Q741*

*If not, then skip to instruction before Q745.*

Q741. **Close Friend:** Person #4 First Name

-----

Q742. **Close friend:** Person #4 Last Name

-----

Q743. **Close Friend:** Person #4 Nick Name

-----

Q744. **Close Friend:** Person #4 Age

|     |                  |
|-----|------------------|
| ___ | years old        |
| 97  | Don't Know       |
| 98  | Refuse to Answer |

*If Q728 is greater than 4 then skip to Q745*

*If not, then skip to Q749.*

Q745. **Close Friend:** Person #5 First Name

-----

Q746. **Close friend:** Person #5 Last Name

-----

Q747. **Close Friend:** Person #5 Nick Name

-----

Q748. **Close Friend:** Person #5 Age

\_\_\_ years old

97 Don't Know

98 Refuse to Answer

Q749. **Now, please think of roommates (i.e. housemates, flat mates)** that you have had close contact with in the past 14 days. How many of them have you had contact with?

\_\_\_

98 Refuse to Answer

*If Q749 is greater than 0 then skip to Q750*

*If not, then skip to instruction before Q754.*

Q750. Next, we'll list their names (up to 5 names may be listed).

**Roommate:** Person #1 First Name

-----

Q751. **Roommate:** Person #1 Last Name

-----

Q752. **Roommate:** Person #1 Nick Name

-----





Q761. **Roommate:** Person #3 Age \_\_\_\_\_ years old  
 97 Don't Know  
 98 Refuse to Answer

*If Q749 is greater than 3 then skip to Q762*

*If not, then skip to instruction before Q766.*

Q762. **Roommate:** Person #4 First Name  
 \_\_\_\_\_

Q763. **Roommate:** Person #4 Last Name  
 \_\_\_\_\_

Q764. **Roommate:** Person #4 Nick Name  
 \_\_\_\_\_

Q765. **Roommate:** Person #4 Age \_\_\_\_\_ years old  
 97 Don't Know  
 98 Refuse to Answer

*If Q749 is greater than 4 then skip to Q766*

*If not, then skip to Q770.*

Q766. **Roommate:** Person #5 First Name  
 \_\_\_\_\_

Q767. **Roommate:** Person #5 Last Name  
 \_\_\_\_\_

Q768. **Roommate:** Person #5 Nick Name  
 \_\_\_\_\_

- Q769. **Roommate:** Person #5 Age \_\_\_\_\_ years old
- 97 Don't Know
- 98 Refuse to Answer

Q770. **Now, please think of neighbors** that you have had close contact with in the past 14 days. How many of them have you had contact with?

- \_\_\_\_\_
- 98 Refuse to Answer

*If Q770 is greater than 0 then skip to Q771*

*If not, then skip to instruction before Q775.*

Q771. Next, we'll list their names (up to 5 names may be listed).  
**Neighbor:** Person #1 First Name

-----

Q772. **Neighbor:** Person #1 Last Name

-----

Q773. **Neighbor:** Person #1 Nick Name

-----

- Q774. **Neighbor:** Person #1 Age \_\_\_\_\_ years old
- 97 Don't Know
- 98 Refuse to Answer

*If Q770 is greater than 1 then skip to Q775*

*If not, then skip to instruction before Q779.*

Q775. **Neighbor:** Person #2 First Name

-----

Q776. **Neighbor:** Person #2 Last Name

-----

Q777. **Neighbor:** Person #2 Nick Name

-----

Q778. **Neighbor:** Person #2 Age

\_\_\_ years old

97 Don't Know

98 Refuse to Answer

*If Q770 is greater than 2 then skip to Q779*

*If not, then skip to instruction before Q783.*

Q779. **Neighbor:** Person #3 First Name

-----

Q780. **Neighbor:** Person #3 Last Name

-----

Q781. **Neighbor:** Person #3 Nick Name

-----

Q782. **Neighbor:** Person #3 Age

\_\_\_ years old

97 Don't Know

98 Refuse to Answer

*If Q770 is greater than 3 then skip to Q783*

*If not, then skip to instruction before Q787.*

Q783. **Neighbor:** Person #4 First Name

-----

Q784. **Neighbor:** Person #4 Last Name

-----

Q785. **Neighbor:** Person #4 Nick Name

-----

Q786. **Neighbor:** Person #4 Age

\_\_\_ years old

97 Don't Know

98 Refuse to Answer

*If Q770 is greater than 4 then skip to Q787*

*If not, then skip to Q791.*

Q787. **Neighbor:** Person #5 First Name

-----

Q788. **Neighbor:** Person #5 Last Name

-----

Q789. **Neighbor:** Person #5 Nick Name

-----

Q790. **Neighbor:** Person #5 Age

\_\_\_ years old

97 Don't Know

98 Refuse to Answer

Q791. **Now, please think of work related people (co-workers, bosses, customers) that you have had close contact with in the past 14 days. How many of them have you had contact with?**

\_\_\_

98 Refuse to Answer

*If Q791 is greater than 0 then skip to Q792*

*If not, then skip to instruction before Q796.*

Q792. Next, we'll list their names (up to 5 names may be listed).  
**Work Related:** Person #1 First Name

-----

Q793. **Work Related:** Person #1 Last Name

-----

Q794. **Work Related:** Person #1 Nick Name

-----

|                                          |     |                  |
|------------------------------------------|-----|------------------|
| Q795. <b>Work Related:</b> Person #1 Age | ___ | years old        |
|                                          | 97  | Don't Know       |
|                                          | 98  | Refuse to Answer |

*If Q791 is greater than 1 then skip to Q796*

*If not, then skip to instruction before Q800.*

Q796. **Work Related:** Person #2 First Name

-----

Q797. **Work Related:** Person #2 Last Name

-----

Q798. **Work Related:** Person #2 Nick Name

-----

|                                          |     |                  |
|------------------------------------------|-----|------------------|
| Q799. <b>Work Related:</b> Person #2 Age | ___ | years old        |
|                                          | 97  | Don't Know       |
|                                          | 98  | Refuse to Answer |

*If Q791 is greater than 2 then skip to Q800*

*If not, then skip to instruction before Q804.*

Q800. **Work Related:** Person #3 First Name

-----

Q801. **Work Related:** Person #3 Last Name

-----

Q802. **Work Related:** Person #3 Nick Name

-----

|                                          |     |                  |
|------------------------------------------|-----|------------------|
| Q803. <b>Work Related:</b> Person #3 Age | ___ | years old        |
|                                          | 97  | Don't Know       |
|                                          | 98  | Refuse to Answer |

*If Q791 is greater than 3 then skip to Q804*

*If not, then skip to instruction before Q808.*

Q804. **Work Related:** Person #4 First Name

-----

Q805. **Work Related:** Person #4 Last Name

-----

Q806. **Work Related:** Person #4 Nick Name

-----

|                                          |     |                  |
|------------------------------------------|-----|------------------|
| Q807. <b>Work Related:</b> Person #4 Age | ___ | years old        |
|                                          | 97  | Don't Know       |
|                                          | 98  | Refuse to Answer |

*If Q791 is greater than 4 then skip to Q808*

*If not, then skip to Q812.*

Q808. **Work Related:** Person #5 First Name

-----

Q809. **Work Related:** Person #5 Last Name

-----

Q810. **Work Related:** Person #5 Nick Name

-----

|                                          |     |                  |
|------------------------------------------|-----|------------------|
| Q811. <b>Work Related:</b> Person #5 Age | ___ | years old        |
|                                          | 97  | Don't Know       |
|                                          | 98  | Refuse to Answer |

Q812. **Now, please think of classmates** that you have had close contact with in the past 14 days. How many of them have you had contact with?

\_\_\_

98 Refuse to Answer

*If Q812 is greater than 0 then skip to Q813*

*If not, then skip to instruction before Q817.*

Q813. Next, we'll list their names (up to 5 names may be listed).  
**Classmate:** Person #1 First Name

-----

Q814. **Classmate:** Person #1 Last Name

-----

Q815. **Classmate:** Person #1 Nick Name

-----









Q839. **Drugs or alcohol related:** Person #2 Last Name

-----

Q840. **Drugs or alcohol related:** Person #2 Nick Name

-----

Q841. **Drugs or alcohol related:** Person #2 Age

\_\_\_ years old

97 Don't Know

98 Refuse to Answer

*If Q833 is greater than 2 then skip to Q842*

*If not, then skip to instruction before Q846.*

Q842. **Drugs or alcohol related:** Person #3 First Name

-----

Q843. **Drugs or alcohol related:** Person #3 Last Name

-----

Q844. **Drugs or alcohol related:** Person #3 Nick Name

-----

Q845. **Drugs or alcohol related:** Person #3 Age

\_\_\_ years old

97 Don't Know

98 Refuse to Answer

*If Q833 is greater than 3 then skip to Q846*

*If not, then skip to instruction before Q850.*

Q846. **Drugs or alcohol related:** Person #4 First Name

-----



Q855. Next, we'll list their names (up to 5 names may be listed).  
**People who provide you a service: Person #1 First Name**

-----

Q856. **People who provide you a service: Person #1 Last Name**

-----

Q857. **People who provide you a service: Person #1 Nick Name**

-----

|                                                              |       |                  |
|--------------------------------------------------------------|-------|------------------|
| Q858. <b>People who provide you a service: Person #1 Age</b> | __ __ | years old        |
|                                                              | 97    | Don't Know       |
|                                                              | 98    | Refuse to Answer |

*If Q854 is greater than 1 then skip to Q859*

*If not, then skip to instruction before Q863.*

Q859. **People who provide you a service: Person #2 First Name**

-----

Q860. **People who provide you a service: Person #2 Last Name**

-----

Q861. **People who provide you a service: Person #2 Nick Name**

-----

|                                                              |       |                  |
|--------------------------------------------------------------|-------|------------------|
| Q862. <b>People who provide you a service: Person #2 Age</b> | __ __ | years old        |
|                                                              | 97    | Don't Know       |
|                                                              | 98    | Refuse to Answer |

*If Q854 is greater than 2 then skip to Q863*

*If not, then skip to instruction before Q867.*

Q863. **People who provide you a service:** Person #3 First Name

-----

Q864. **People who provide you a service:** Person #3 Last Name

-----

Q865. **People who provide you a service:** Person #3 Nick Name

-----

|                                                              |     |                  |
|--------------------------------------------------------------|-----|------------------|
| Q866. <b>People who provide you a service:</b> Person #3 Age | ___ | years old        |
|                                                              | 97  | Don't Know       |
|                                                              | 98  | Refuse to Answer |

*If Q854 is greater than 3 then skip to Q867*

*If not, then skip to instruction before Q871.*

Q867. **People who provide you a service:** Person #4 First Name

-----

Q868. **People who provide you a service:** Person #4 Last Name

-----

Q869. **People who provide you a service:** Person #4 Nick Name

-----

|                                                              |     |                  |
|--------------------------------------------------------------|-----|------------------|
| Q870. <b>People who provide you a service:</b> Person #4 Age | ___ | years old        |
|                                                              | 97  | Don't Know       |
|                                                              | 98  | Refuse to Answer |

*If Q854 is greater than 4 then skip to Q871*

*If not, then skip to Q875.*

Q871. **People who provide you a service:** Person #5 First Name

-----

Q872. **People who provide you a service:** Person #5 Last Name

-----

Q873. **People who provide you a service:** Person #5 Nick Name

-----

Q874. **People who provide you a service:** Person #5 Age

|     |                  |
|-----|------------------|
| ___ | years old        |
| 97  | Don't Know       |
| 98  | Refuse to Answer |

Q875. **Now, please think of *other people not mentioned previously (e.g., people you saw at community groups, religious services, sports or exercise classes, school, etc.)* that you have had close contact with in the past 14 days. How many of them have you had contact with?**

\_\_\_

98 Refuse to Answer

***If Q875 is greater than 0 then skip to Q876***

***If not, then skip to instruction before Q880.***

Q876. Next, we'll list their names (up to 5 names may be listed).  
**Other people:** Person #1 First Name

-----

Q877. **Other people:** Person #1 Last Name

-----

Q878. **Other people:** Person #1 Nick Name

-----







- Q895. **Other people:** Person #5 Age \_\_\_\_\_ years old
- 97 Don't Know
- 98 Refuse to Answer

*If Q686 + Q707 + Q728 + Q749 + Q770 + Q791 + Q812 + Q833 + Q854 + Q875 is greater than 0 then skip to instruction before Q896*

*If not, then skip to instruction before Q899.*

**READ:** *Of the people you listed, please think about which 5 people you've had the most contact with. This could be the longest number of hours of non-physical contact (within 6 ft) with a person and/or the most physical contact.*

- Q896. Next, we'll list their names.  
**Most Contact:** Person #1 First Name
- \_\_\_\_\_

- Q897. **Most Contact:** Person #1 Last Name
- \_\_\_\_\_

- Q898. **Most Contact:** Person #1 Nick Name
- \_\_\_\_\_

*If Q686 + Q707 + Q728 + Q749 + Q770 + Q791 + Q812 + Q833 + Q854 + Q875 is greater than 1 then skip to Q899*

*If not, then skip to instruction before Q902.*

- Q899. **Most Contact:** Person #2 First Name
- \_\_\_\_\_

- Q900. **Most Contact:** Person #2 Last Name
- \_\_\_\_\_

- Q901. **Most Contact:** Person #2 Nick Name
- \_\_\_\_\_

*If Q686 + Q707 + Q728 + Q749 + Q770 + Q791 + Q812 + Q833 + Q854 + Q875 is greater than 2 then skip to Q902*

*If not, then skip to instruction before Q905.*

Q902. **Most Contact:** Person #3 First Name

-----

Q903. **Most Contact:** Person #3 Last Name

-----

Q904. **Most Contact:** Person #3 Nick Name

-----

*If Q686 + Q707 + Q728 + Q749 + Q770 + Q791 + Q812 + Q833 + Q854 + Q875 is greater than 3 then skip to Q905*

*If not, then skip to instruction before Q908.*

Q905. **Most Contact:** Person #4 First Name

-----

Q906. **Most Contact:** Person #4 Last Name

-----

Q907. **Most Contact:** Person #4 Nick Name

-----

*If Q686 + Q707 + Q728 + Q749 + Q770 + Q791 + Q812 + Q833 + Q854 + Q875 is greater than 4 then skip to Q908*

*If not, then skip to instruction before Q911.*

Q908. **Most Contact:** Person #5 First Name

-----

Q909. **Most Contact:** Person #5 Last Name

-----

Q910. **Most Contact:** Person #5 Nick Name

-----

*MCL1 = If(Q897 is not equal to 97 and Q897 is not equal to 98, Q897, )*

*MCN1 = If(Q898 is not equal to 97 and Q898 is not equal to 98, Q898, )*

*MCL2 = If(Q900 is not equal to 97 and Q900 is not equal to 98, Q900, )*

*MCN2 = If(Q901 is not equal to 97 and Q901 is not equal to 98, Q901, )*

*MCL3 = If(Q903 is not equal to 97 and Q903 is not equal to 98, Q903, )*

*MCN3 = If(Q904 is not equal to 97 and Q904 is not equal to 98, Q904, )*

*MCL4 = If(Q906 is not equal to 97 and Q906 is not equal to 98, Q906, )*

*MCN4 = If(Q907 is not equal to 97 and Q907 is not equal to 98, Q907, )*

*MCL5 = If(Q909 is not equal to 97 and Q909 is not equal to 98, Q909, )*

*MCN5 = If(Q910 is not equal to 97 and Q910 is not equal to 98, Q910, )*

**READ:** *Now we are going to ask some follow-up questions about the people you said you've had the most close contact with in the past 14 days.*

*If Q686 + Q707 + Q728 + Q749 + Q770 + Q791 + Q812 + Q833 + Q854 + Q875 is greater than 0 and Q896 is not equal to "Refuse to Answer" and Q896 is not equal to "skipped" then skip to Q911*

*If not, then skip to instruction before Q954.*

Q911. Is [Response to Q896] [MCL1] ([MCN1]) male, female, transgender, non-binary or another? (Choose one)

- 1 Male
- 2 Female
- 3 Trans female
- 4 Trans male
- 5 Non-binary / genderqueer / gender fluid / agender
- 6 Another gender identity not listed
- 8 Refuse to Answer

*If Q911 is equal to 6 then skip to Q912*

*If not, then skip to Q913.*

Q912. Please specify the gender identity of [Response to Q896].

-----

- Q913. Where does [Response to Q896] primarily live? (Choose one)
- 1 Mexico
  - 2 United States
  - 3 Other
  - 7 Don't Know
  - 8 Refuse to Answer

*If Q913 is equal to 3 then skip to Q914*

*If not, then skip to Q915.*

Q914. Please specify where [Response to Q896] primarily lives.

-----

Q915. Did you meet [Response to Q896] for the first time in the previous 14 days?

- 1 Yes
- 0 No
- 8 Refuse to Answer

Q916. How many days have you seen [Response to Q896] in the previous 14 days?

- \_\_\_ Days
- 98 Refuse to Answer

Q917. On average, on the days that you saw [Response to Q896], how much time (e.g., hours, minutes) did you spend in close contact with him/her? Interviewer: the max amount of time per day is 24 hours.

- \_\_\_ HOURS
- \_\_\_ MINUTES
- 98 Refuse to Answer (Hours)

Q918. When was the last time you had close contact with [Response to Q896] in the past 14 days? Interviewer: Enter how many days ago the participant had close contact for the last time with the person in question. If the last time was today, enter 0.

- \_\_\_ DAYS
- 98 Refuse to Answer (Days)

***If Q916 is greater than 1 then skip to Q919***

***If not, then skip to Q920.***

Q919. During that last contact, on how many consecutive days did you see [Response to Q896]?

- \_\_\_ days
- 98 Refuse to Answer

***MC1FDAY = If(Q918 is equal to 1, Q918, If(Q918 is not equal to 98 and Q918 is greater than 1, Q918 + Q919, "missing"))***

Q920. When you saw [Response to Q896] that last time, what type of contact did you have with them? (Check all that apply) (Check all that apply)

- Physical, non-sexual [i.e. handshake, hug, skin contact, etc.]
- Physical, sexual
- Non-physical [i.e. in-person conversation, meal/drinks, meeting]
- Refuse to Answer

Q921. When you saw [Response to Q896] that last time, at which of the following places did the close contact occur? (Check all that apply) (Check all that apply)

- Home/someone's house
- Work
- Restaurant or cafe
- Leisure (i.e. a theater, bar, night club)
- School/education
- Exercise or fitness related (i.e., gym, fitness studio)
- Personal service (i.e. haircut, massage)
- Religious service (place of worshiip)
- Community Center/Group
- Park
- Street
- El Bordo/Canal
- Shooting gallery
- Other
- Refuse to Answer

***If Q921N is equal to 1 then skip to Q922***

***If not, then skip to instruction before Q923.***



Q922. Please specify the place (i.e., name of the place and cross-streets or neighborhood/colonia) where the last close contact with [Response to Q896] occurred.

-----

***If Q921A is equal to 1 then skip to Q923***

***If not, then skip to instruction before Q924.***

Q923. You said the the last close contact with [Response to Q896] occurred at your house/someone else's house. Where is this house located? Could you please provide the name of the cross-streets at the nearest intersection? Interviewer: Please type in the names of the cross-streets. If the participant cannot provide this information, ask them the name of the neighborhood/colonia and type in that info.

-----

-----

***If Q921B is equal to 1 then skip to Q924***

***If not, then skip to instruction before Q925.***

Q924. You said that the last close contact with [Response to Q896] occurred at work. Could you please provide the name of the work place and the address? Interviewer: If the work place does not have a name or address, record whatever info the participant can provide for the location (i.e., cross-streets, neighborhood/colonia).

-----

-----

***If Q921C is equal to 1 then skip to Q925***

***If not, then skip to instruction before Q926.***

Q925. You said that the last close contact with [Response to Q896] occurred at a restaurant/cafe. Could you please provide the name of this place and the cross-streets/neighborhood/colonia where this restaurant is located?

-----

-----

***If Q921D is equal to 1 then skip to Q926***

***If not, then skip to instruction before Q927.***

Q926. You said that the last close contact with [Response to Q896] occurred at a place of leisure (i.e. a theater, bar, night club). Could you please provide the name of the place and the cross-streets/neighborhood/colonia where this place is located?

-----  
-----

***If Q921E is equal to 1 then skip to Q927***

***If not, then skip to instruction before Q928.***

Q927. You said that the last close contact with [Response to Q896] occurred at a school/education place. Could you please provide the name of this place and the cross-streets/neighborhood/colonia where this place is located?

-----  
-----

***If Q921F is equal to 1 then skip to Q928***

***If not, then skip to instruction before Q929.***

Q928. You said that the last close contact with [Response to Q896] occurred at a gym/fitness place. Could you please provide the name of this place and the cross streets/neighborhood/colonia where this place is located?

-----  
-----

***If Q921G is equal to 1 then skip to Q929***

***If not, then skip to instruction before Q930.***

Q929. You said that the last close contact with [Response to Q896] occurred at a personal service (i.e. haircut, massage) place. Could you please provide the name of this place and the cross streets/neighborhood/colonia where this place is located?

-----  
-----

***If Q921H is equal to 1 then skip to Q930***

***If not, then skip to instruction before Q931.***

Q930. You said that the last close contact with [Response to Q896] occurred at a religious service place. Could you please provide the name of this place and the cross streets/neighborhood/colonia where this place is located?

-----  
-----

*If Q921I is equal to 1 then skip to Q931*

*If not, then skip to instruction before Q932.*

Q931. You said that the last close contact with [Response to Q896] occurred at a community center/group place. Could you please provide the name of this place and the cross streets/neighborhood/colonia where this place is located?

-----  
-----

*If Q921J is equal to 1 then skip to Q932*

*If not, then skip to instruction before Q933.*

Q932. You said that the last close contact with [Response to Q896] occurred at a park. Could you please provide the name of this place and the cross streets/neighborhood/colonia where this place is located?

-----  
-----

*If Q921K is equal to 1 then skip to Q933*

*If not, then skip to instruction before Q934.*

Q933. You said that the last close contact with [Response to Q896] occurred on the street. Could you please provide the name of this street and the neighborhood/colonia where this place is located?

-----  
-----

*If Q921M is equal to 1 then skip to Q934*

*If not, then skip to instruction before Q935.*

Q934. You said that the last close contact with [Response to Q896] occurred at a shooting gallery. Which shooting gallery did it occur at? (Choose one)

- 01 Las Palmitas/Zona Norte
- 02 Los Pinos/ Zona Norte
- 03 Las Bombas/ Zona Norte
- 04 Los Aragón/ Zona Norte
- 05 La Veinte/ Bordo, Col. Veinte de Noviembre
- 06 El Azteca/ Cerro Colorado
- 07 Oxxo, Calle 5ta Zona Norte
- 08 Bordo/ Los Álamos, Mundo divertido
- 09 Cañón Guerrero/Maclovio Herrera Colonia Guerrero
- 10 Col. Guaycura (casa privada)
- 11 Col. Presidentes (Infonavit edificio)
- 12 Florido 1era Sección (casa privada)
- 13 Florido 1era Sección (Bomberos, conecta)
- 14 Col. Francisco Villa (edificio abandonado)
- 15 Cañón del Pato/ Colonia Villa
- 16 Col. Postal (casa privada)
- 17 Col. del Río (Parte baja, barranco)
- 18 Sánchez Taboada (Av. Sánchez Taboada y Parque Industrial)
- 19 La cima (casa abandonado)
- 20 Otay módulos
- 21 Other
- 98 Refuse to Answer

***If Q934 is equal to 21 then skip to Q935***

**If not, then skip to instruction before Q936.**

Q935. Please specify the shooting gallery (i.e., name of the place and cross-streets or neighborhood/colonia) where the last close contact with [Response to Q896] occurred.

-----

**If Q916 is greater than 1 then skip to Q936**

**If not, then skip to instruction before Q954.**

Q936. Please think of a different time that you saw [Response to Q896] in the past 14 days, other than the contact that you just described. By 'time' we mean a contact where you saw [Response to Q896] in person and then separated. How many days ago did that take place?

\_\_\_ DAYS  
98 Refuse to Answer (Days)

**If Q936 is less than MC1FDAY then READ: "This time is more recent than the first day of the last contact. Please make corrections." and skip to Q936.**

**If Q916 is greater than 1 then skip to Q937**

**If not, then skip to Q938.**

Q937. During this contact, on how many consecutive days did you see [Response to Q896]?

\_\_\_ days  
98 Refuse to Answer

Q938. When you saw [Response to Q896] that time, what type of contact did you have with them? (Check all that apply) (Check all that apply)

- \_\_\_ Physical, non-sexual [i.e. handshake, hug, skin contact, etc.]
- \_\_\_ Physical, sexual
- \_\_\_ Non-physical [i.e. in-person conversation, meal/drinks, meeting]
- \_\_\_ Refuse to Answer

Q939. When you saw [Response to Q896] that time, at which of the following places did the close contact occur? (Check all that apply) (Check all that apply)

- Home/someone's house
- Work
- Restaurant or cafe
- Leisure (i.e. a theater, bar, night club)
- School/education
- Exercise or fitness related (i.e., gym, fitness studio)
- Personal service (i.e. haircut, massage)
- Religious service (place of worshiip)
- Community Center/Group
- Park
- Street
- El Bordo/Canal
- Shooting gallery
- Other
- Refuse to Answer

***If Q939N is equal to 1 then skip to Q940***

***If not, then skip to instruction before Q941.***

Q940. Please specify the place (i.e., name of the place and cross-streets or neighborhood/colonia) where that close contact wiith [Response to Q896] occurred.

-----

***If Q939A is equal to 1 then skip to Q941***

***If not, then skip to instruction before Q942.***

Q941. You said the the last close contact with [Response to Q896] occurred at your house/someone else's house. Where is this house located? Could you please provide the name of the cross-streets at the nearest intersection? Interviewer: Please type in the names of the cross-streets. If the participant cannot provide this information, ask them the name of the neighborhood/colonia and type in that info.

-----  
-----

*If Q939B is equal to 1 then skip to Q942*

*If not, then skip to instruction before Q943.*

Q942. You said that the last close contact with [Response to Q896] occurred at work. Could you please provide the name of the work place and the address? Interviewer: If the work place does not have a name or address, record whatever info the participant can provide for the location (i.e., cross-streets, neighborhood/colonia).

-----  
-----

*If Q939C is equal to 1 then skip to Q943*

*If not, then skip to instruction before Q944.*

Q943. You said that the last close contact with [Response to Q896] occurred at a restaurant/cafe. Could you please provide the name of this place and the cross-streets/neighborhood/colonia where this restaurant is located?

-----  
-----

*If Q939D is equal to 1 then skip to Q944*

*If not, then skip to instruction before Q945.*

Q944. You said that the last close contact with [Response to Q896] occurred at a place of leisure (i.e. a theater, bar, night club). Could you please provide the name of the place and the cross-streets/neighborhood/colonia where this place is located?

-----  
-----

*If Q939E is equal to 1 then skip to Q945*

*If not, then skip to instruction before Q946.*

Q945. You said that the last close contact with [Response to Q896] occurred at a school/education place. Could you please provide the name of this place and the cross-streets/neighborhood/colonia where this place is located?

-----  
-----

*If Q939F is equal to 1 then skip to Q946*

*If not, then skip to instruction before Q947.*

Q946. You said that the last close contact with [Response to Q896] occurred at a gym/fitness place. Could you please provide the name of this place and the cross streets/neighborhood/colonia where this place is located?

-----  
-----

*If Q939G is equal to 1 then skip to Q947*

*If not, then skip to instruction before Q948.*

Q947. You said that the last close contact with [Response to Q896] occurred at a personal service (i.e. haircut, massage) place. Could you please provide the name of this place and the cross streets/neighborhood/colonia where this place is located?

-----  
-----

*If Q939H is equal to 1 then skip to Q948*

*If not, then skip to instruction before Q949.*

Q948. You said that the last close contact with [Response to Q896] occurred at a religious service place. Could you please provide the name of this place and the cross streets/neighborhood/colonia where this place is located?

-----  
-----

*If Q939I is equal to 1 then skip to Q949*

*If not, then skip to instruction before Q950.*



Q949. You said that the last close contact with [Response to Q896] occurred at a community center/group place. Could you please provide the name of this place and the cross streets/neighborhood/colonia where this place is located?

-----  
-----

*If Q939J is equal to 1 then skip to Q950*

*If not, then skip to instruction before Q951.*

Q950. You said that the last close contact with [Response to Q896] occurred at a park. Could you please provide the name of this place and the cross streets/neighborhood/colonia where this place is located?

-----  
-----

*If Q939K is equal to 1 then skip to Q951*

*If not, then skip to instruction before Q952.*

Q951. You said that the last close contact with [Response to Q896] occurred on the street. Could you please provide the name of this street and the neighborhood/colonia where this place is located?

-----  
-----

*If Q939L is equal to 1 then skip to Q952*

*If not, then skip to instruction before Q953.*

Q952. You said that the last close contact with [Response to Q896] occurred at a shooting gallery. Which shooting gallery did it occur at? (Choose one)

- 01 Las Palmitas/Zona Norte
- 02 Los Pinos/ Zona Norte
- 03 Las Bombas/ Zona Norte
- 04 Los Aragón/ Zona Norte
- 05 La Veinte/ Bordo, Col. Veinte de Noviembre
- 06 El Azteca/ Cerro Colorado
- 07 Oxxo, Calle 5ta Zona Norte
- 08 Bordo/ Los Álamos, Mundo divertido
- 09 Cañón Guerrero/Maclovio Herrera Colonia Guerrero
- 10 Col. Guaycura (casa privada)
- 11 Col. Presidentes (Infonavit edificio)
- 12 Florido 1era Sección (casa privada)
- 13 Florido 1era Sección (Bomberos, conecta)
- 14 Col. Francisco Villa (edificio abandonado)
- 15 Cañón del Pato/ Colonia Villa
- 16 Col. Postal (casa privada)
- 17 Col. del Río (Parte baja, barranco)
- 18 Sánchez Taboada (Av. Sánchez Taboada y Parque Industrial)
- 19 La cima (casa abandonado)
- 20 Otay módulos
- 21 Other
- 98 Refuse to Answer

***If Q952 is equal to 21 then skip to Q953***

***If not, then skip to instruction before Q954.***

Q953. Please specify the shooting gallery (i.e., name of the place and cross-streets or neighborhood/colonia) where the last close contact with [Response to Q896] occurred.

-----

***If Q686 + Q707 + Q728 + Q749 + Q770 + Q791 + Q812 + Q833 + Q854 + Q875 is greater than 1 and Q899 is not equal to "Refuse to Answer" and Q899 is not equal to "skipped" then skip to Q954***

***If not, then skip to instruction before Q997.***

Q954. Is [Response to Q899] [MCL2] ([MCN2]) male, female, transgender, non-binary or another? (Choose one)

- 1 Male
- 2 Female
- 3 Trans female
- 4 Trans male
- 5 Non-binary / genderqueer / gender fluid / agender
- 6 Another gender identity not listed
- 8 Refuse to Answer

***If Q954 is equal to 6 then skip to Q955***

***If not, then skip to Q956.***

Q955. Please specify the gender identity of [Response to Q899].

-----

- Q956. Where does [Response to Q899] primarily live? (Choose one)
- 1 Mexico
  - 2 United States
  - 3 Other
  - 7 Don't Know
  - 8 Refuse to Answer

**If Q956 is equal to 3 then skip to Q957**

**If not, then skip to Q958.**

Q957. Please specify where [Response to Q899] primarily lives.

-----

Q958. Did you meet [Response to Q899] for the first time in the previous 14 days?

- 1 Yes
- 0 No
- 8 Refuse to Answer

Q959. How many days have you seen [Response to Q899] in the previous 14 days?

- \_\_\_ Days
- 98 Refuse to Answer

Q960. On average, on the days that you saw [Response to Q899], how much time (e.g., hours, minutes) did you spend in close contact with him/her? Interviewer: the max amount of time per day is 24 hours.

- \_\_\_ HOURS
- \_\_\_ MINUTES
- 98 Refuse to Answer (Hours)

Q961. When was the last time you had close contact with [Response to Q899] in the past 14 days? Interviewer: Enter how many days ago the participant had close contact for the last time with the person in question. If the last time was today, enter 0.

- \_\_\_ DAYS
- 98 Refuse to Answer (Days)

**If Q959 is greater than 1 then skip to Q962**

**If not, then skip to Q963.**

Q962. During that last contact, on how many consecutive days did you see [Response to Q899]?

\_\_\_ days

98 Refuse to Answer

***MC2FDAY = If(Q961 is equal to 1, Q961, If(Q961 is not equal to 98 and Q961 is greater than 1, Q961 + Q962, "missing"))***

Q963. When you saw [Response to Q899] that last time, what type of contact did you have with them? (Check all that apply) (Check all that apply)

\_\_\_ Physical, non-sexual [i.e. handshake, hug, skin contact, etc.]

\_\_\_ Physical, sexual

\_\_\_ Non-physical [i.e. in-person conversation, meal/drinks, meeting]

\_\_\_ Refuse to Answer

Q964. When you saw [Response to Q899] that last time, at which of the following places did the close contact occur? (Check all that apply) (Check all that apply)

- Home/someone's house
- Work
- Restaurant or cafe
- Leisure (i.e. a theater, bar, night club)
- School/education
- Exercise or fitness related (i.e., gym, fitness studio)
- Personal service (i.e. haircut, massage)
- Religious service (place of worshiip)
- Community Center/Group
- Park
- Street
- El Bordo/Canal
- Shooting gallery
- Other
- Refuse to Answer

***If Q964N is equal to 1 then skip to Q965***

***If not, then skip to instruction before Q966.***

Q965. Please specify the place (i.e., name of the place and cross-streets or neighborhood/colonia) where the last close contact wiith [Response to Q899] occurred.

-----

***If Q964A is equal to 1 then skip to Q966***

***If not, then skip to instruction before Q967.***

Q966. You said the the last close contact with [Response to Q899] occurred at your house/someone else's house. Where is this house located? Could you please provide the name of the cross-streets at the nearest intersection? Interviewer: Please type in the names of the cross-streets. If the participant cannot provide this information, ask them the name of the neighborhood/colonia and type in that info.

-----  
-----

***If Q964B is equal to 1 then skip to Q967***

***If not, then skip to instruction before Q968.***

Q967. You said that the last close contact with [Response to Q899] occurred at work. Could you please provide the name of the work place and the address? Interviewer: If the work place does not have a name or address, record whatever info the participant can provide for the location (i.e., cross-streets, neighborhood/colonia).

-----  
-----

***If Q964C is equal to 1 then skip to Q968***

***If not, then skip to instruction before Q969.***

Q968. You said that the last close contact with [Response to Q899] occurred at a restaurant/cafe. Could you please provide the name of this place and the cross-streets/neighborhood/colonia where this restaurant is located?

-----  
-----

***If Q964D is equal to 1 then skip to Q969***

***If not, then skip to instruction before Q970.***

Q969. You said that the last close contact with [Response to Q899] occurred at a place of leisure (i.e. a theater, bar, night club). Could you please provide the name of the place and the cross-streets/neighborhood/colonia where this place is located?

-----  
-----

***If Q964E is equal to 1 then skip to Q970***

***If not, then skip to instruction before Q971.***

Q970. You said that the last close contact with [Response to Q896] occurred at a school/education place. Could you please provide the name of this place and the cross-streets/neighborhood/colonia where this place is located?

-----  
-----

***If Q964F is equal to 1 then skip to Q971***

***If not, then skip to instruction before Q972.***

Q971. You said that the last close contact with [Response to Q899] occurred at a gym/fitness place. Could you please provide the name of this place and the cross streets/neighborhood/colonia where this place is located?

-----  
-----

***If Q964G is equal to 1 then skip to Q972***

***If not, then skip to instruction before Q973.***

Q972. You said that the last close contact with [Response to Q899] occurred at a personal service (i.e. haircut, massage) place. Could you please provide the name of this place and the cross streets/neighborhood/colonia where this place is located?

-----  
-----

***If Q964H is equal to 1 then skip to Q973***

***If not, then skip to instruction before Q974.***

Q973. You said that the last close contact with [Response to Q899] occurred at a religious service place. Could you please provide the name of this place and the cross streets/neighborhood/colonia where this place is located?

-----  
-----

***If Q964I is equal to 1 then skip to Q974***

***If not, then skip to instruction before Q975.***



Q974. You said that the last close contact with [Response to Q899] occurred at a community center/group place. Could you please provide the name of this place and the cross streets/neighborhood/colonia where this place is located?

-----  
-----

*If Q964J is equal to 1 then skip to Q975*

*If not, then skip to instruction before Q976.*

Q975. You said that the last close contact with [Response to Q899] occurred at a park. Could you please provide the name of this place and the cross streets/neighborhood/colonia where this place is located?

-----  
-----

*If Q964K is equal to 1 then skip to Q976*

*If not, then skip to instruction before Q977.*

Q976. You said that the last close contact with [Response to Q899] occurred on the street. Could you please provide the name of this street and the neighborhood/colonia where this place is located?

-----  
-----

*If Q964M is equal to 1 then skip to Q977*

*If not, then skip to instruction before Q978.*

Q977. You said that the last close contact with [Response to Q899] occurred at a shooting gallery. Which shooting gallery did it occur at? (Choose one)

- 01 Las Palmitas/Zona Norte
- 02 Los Pinos/ Zona Norte
- 03 Las Bombas/ Zona Norte
- 04 Los Aragón/ Zona Norte
- 05 La Veinte/ Bordo, Col. Veinte de Noviembre
- 06 El Azteca/ Cerro Colorado
- 07 Oxxo, Calle 5ta Zona Norte
- 08 Bordo/ Los Álamos, Mundo divertido
- 09 Cañón Guerrero/Maclovio Herrera Colonia Guerrero
- 10 Col. Guaycura (casa privada)
- 11 Col. Presidentes (Infonavit edificio)
- 12 Florido 1era Sección (casa privada)
- 13 Florido 1era Sección (Bomberos, conecta)
- 14 Col. Francisco Villa (edificio abandonado)
- 15 Cañón del Pato/ Colonia Villa
- 16 Col. Postal (casa privada)
- 17 Col. del Río (Parte baja, barranco)
- 18 Sánchez Taboada (Av. Sánchez Taboada y Parque Industrial)
- 19 La cima (casa abandonado)
- 20 Otay módulos
- 21 Other
- 98 Refuse to Answer

***If Q977 is equal to 21 then skip to Q978***

**If not, then skip to instruction before Q979.**

Q978. Please specify the shooting gallery (i.e., name of the place and cross-streets or neighborhood/colonia) where the last close contact with [Response to Q899] occurred.

-----

**If Q959 is greater than 1 then skip to Q979**

**If not, then skip to instruction before Q997.**

Q979. Please think of a different time that you saw [Response to Q899] in the past 14 days, other than the contact that you just described. By 'time' we mean a contact where you saw [Response to Q899] in person and then separated. How many days ago did that take place?

\_\_\_ DAYS  
98 Refuse to Answer (Days)

**If Q979 is less than MC2FDAY then READ: "This time is more recent than the first day of the last contact. Please make corrections." and skip to Q979.**

**If Q959 is greater than 1 then skip to Q980**

**If not, then skip to Q981.**

Q980. During this contact, on how many consecutive days did you see [Response to Q899]?

\_\_\_ days  
98 Refuse to Answer

Q981. When you saw [Response to Q899] that time, what type of contact did you have with them? (Check all that apply) (Check all that apply)

- \_\_\_ Physical, non-sexual [i.e. handshake, hug, skin contact, etc.]
- \_\_\_ Physical, sexual
- \_\_\_ Non-physical [i.e. in-person conversation, meal/drinks, meeting]
- \_\_\_ Refuse to Answer

Q982. When you saw [Response to Q899] that time, at which of the following places did the close contact occur? (Check all that apply) (Check all that apply)

- Home/someone's house
- Work
- Restaurant or cafe
- Leisure (i.e. a theater, bar, night club)
- School/education
- Exercise or fitness related (i.e., gym, fitness studio)
- Personal service (i.e. haircut, massage)
- Religious service (place of worshiip)
- Community Center/Group
- Park
- Street
- El Bordo/Canal
- Shooting gallery
- Other
- Refuse to Answer

***If Q982N is equal to 1 then skip to Q983***

***If not, then skip to instruction before Q984.***

Q983. Please specify the place (i.e., name of the place and cross-streets or neighborhood/colonia) where that close contact wiith [Response to Q899] occurred.

-----

***If Q982A is equal to 1 then skip to Q984***

***If not, then skip to instruction before Q985.***

Q984. You said the the last close contact with [Response to Q899] occurred at your house/someone else's house. Where is this house located? Could you please provide the name of the cross-streets at the nearest intersection? Interviewer: Please type in the names of the cross-streets. If the participant cannot provide this information, ask them the name of the neighborhood/colonia and type in that info.

-----  
-----

***If Q982B is equal to 1 then skip to Q985***

***If not, then skip to instruction before Q986.***

Q985. You said that the last close contact with [Response to Q899] occurred at work. Could you please provide the name of the work place and the address? Interviewer: If the work place does not have a name or address, record whatever info the participant can provide for the location (i.e., cross-streets, neighborhood/colonia).

-----  
-----

***If Q982C is equal to 1 then skip to Q986***

***If not, then skip to instruction before Q987.***

Q986. You said that the last close contact with [Response to Q899] occurred at a restaurant/cafe. Could you please provide the name of this place and the cross-streets/neighborhood/colonia where this restaurant is located?

-----  
-----

***If Q982D is equal to 1 then skip to Q987***

***If not, then skip to instruction before Q988.***

Q987. You said that the last close contact with [Response to Q899] occurred at a place of leisure (i.e. a theater, bar, night club). Could you please provide the name of the place and the cross-streets/neighborhood/colonia where this place is located?

-----  
-----

***If Q982E is equal to 1 then skip to Q988***

***If not, then skip to instruction before Q989.***

Q988. You said that the last close contact with [Response to Q899] occurred at a school/education place. Could you please provide the name of this place and the cross-streets/neighborhood/colonia where this place is located?

-----  
-----

***If Q982F is equal to 1 then skip to Q989***

***If not, then skip to instruction before Q990.***

Q989. You said that the last close contact with [Response to Q899] occurred at a gym/fitness place. Could you please provide the name of this place and the cross streets/neighborhood/colonia where this place is located?

-----  
-----

***If Q982G is equal to 1 then skip to Q990***

***If not, then skip to instruction before Q991.***

Q990. You said that the last close contact with [Response to Q899] occurred at a personal service (i.e. haircut, massage) place. Could you please provide the name of this place and the cross streets/neighborhood/colonia where this place is located?

-----  
-----

***If Q982H is equal to 1 then skip to Q991***

***If not, then skip to instruction before Q992.***

Q991. You said that the last close contact with [Response to Q899] occurred at a religious service place. Could you please provide the name of this place and the cross streets/neighborhood/colonia where this place is located?

-----  
-----

***If Q982I is equal to 1 then skip to Q992***

***If not, then skip to instruction before Q993.***

Q992. You said that the last close contact with [Response to Q899] occurred at a community center/group place. Could you please provide the name of this place and the cross streets/neighborhood/colonia where this place is located?

-----  
-----

*If Q982J is equal to 1 then skip to Q993*

*If not, then skip to instruction before Q994.*

Q993. You said that the last close contact with [Response to Q899] occurred at a park. Could you please provide the name of this place and the cross streets/neighborhood/colonia where this place is located?

-----  
-----

*If Q982K is equal to 1 then skip to Q994*

*If not, then skip to instruction before Q995.*

Q994. You said that the last close contact with [Response to Q899] occurred on the street. Could you please provide the name of this street and the neighborhood/colonia where this place is located?

-----  
-----

*If Q982M is equal to 1 then skip to Q995*

*If not, then skip to instruction before Q996.*

Q995. You said that the last close contact with [Response to Q899] occurred at a shooting gallery. Which shooting gallery did it occur at? (Choose one)

- 01 Las Palmitas/Zona Norte
- 02 Los Pinos/ Zona Norte
- 03 Las Bombas/ Zona Norte
- 04 Los Aragón/ Zona Norte
- 05 La Veinte/ Bordo, Col. Veinte de Noviembre
- 06 El Azteca/ Cerro Colorado
- 07 Oxxo, Calle 5ta Zona Norte
- 08 Bordo/ Los Álamos, Mundo divertido
- 09 Cañón Guerrero/Maclovio Herrera Colonia Guerrero
- 10 Col. Guaycura (casa privada)
- 11 Col. Presidentes (Infonavit edificio)
- 12 Florido 1era Sección (casa privada)
- 13 Florido 1era Sección (Bomberos, conecta)
- 14 Col. Francisco Villa (edificio abandonado)
- 15 Cañón del Pato/ Colonia Villa
- 16 Col. Postal (casa privada)
- 17 Col. del Río (Parte baja, barranco)
- 18 Sánchez Taboada (Av. Sánchez Taboada y Parque Industrial)
- 19 La cima (casa abandonado)
- 20 Otay módulos
- 21 Other
- 98 Refuse to Answer

***If Q995 is equal to 21 then skip to Q996***



***If not, then skip to instruction before Q997.***

Q996. Please specify the shooting gallery (i.e., name of the place and cross-streets or neighborhood/colonia) where the last close contact with [Response to Q899] occurred.

-----

***If Q686 + Q707 + Q728 + Q749 + Q770 + Q791 + Q812 + Q833 + Q854 + Q875 is greater than 2 and Q902 is not equal to "Refuse to Answer" and Q902 is not equal to "skipped" then skip to Q997***

***If not, then skip to instruction before Q1040.***

Q997. Is [Response to Q902] [MCL3] ([MCN3]) male, female, transgender, non-binary or another? (Choose one)

- 1 Male
- 2 Female
- 3 Trans female
- 4 Trans male
- 5 Non-binary / genderqueer / gender fluid / agender
- 6 Another gender identity not listed
- 8 Refuse to Answer

***If Q997 is equal to 6 then skip to Q998***

***If not, then skip to Q999.***

Q998. Please specify the gender identity of [Response to Q902].

-----

- Q999. Where does [Response to Q902] primarily live? (Choose one)
- 1 Mexico
  - 2 United States
  - 3 Other
  - 7 Don't Know
  - 8 Refuse to Answer

**If Q999 is equal to 3 then skip to Q1000**

**If not, then skip to Q1001.**

Q1000. Please specify where [Response to Q902] primarily lives.

-----

Q1001. Did you meet [Response to Q902] for the first time in the previous 14 days?

- 1 Yes
- 0 No
- 8 Refuse to Answer

Q1002. How many days have you seen [Response to Q902] in the previous 14 days?

- \_\_\_ Days
- 98 Refuse to Answer

Q1003. On average, on the days that you saw [Response to Q902], how much time (e.g., hours, minutes) did you spend in close contact with him/her? Interviewer: the max amount of time per day is 24 hours.

- \_\_\_ HOURS
- \_\_\_ MINUTES
- 98 Refuse to Answer (Hours)

Q1004. When was the last time you had close contact with [Response to Q902] in the past 14 days? Interviewer: Enter how many days ago the participant had close contact for the last time with the person in question. If the last time was today, enter 0.

- \_\_\_ DAYS
- 98 Refuse to Answer (Days)

**If Q1002 is greater than 1 then skip to Q1005**

**If not, then skip to Q1006.**

Q1005. During that last contact, on how many consecutive days did you see [Response to Q902]?

\_\_\_ days

98 Refuse to Answer

*MC3FDAY = If(Q1004 is equal to 1, Q1004, If(Q1004 is not equal to 98 and Q1004 is greater than 1, Q1004 + Q1005, "missing"))*

Q1006. When you saw [Response to Q902] that last time, what type of contact did you have with them? (Check all that apply) (Check all that apply)

\_\_\_ Physical, non-sexual [i.e. handshake, hug, skin contact, etc.]

\_\_\_ Physical, sexual

\_\_\_ Non-physical [i.e. in-person conversation, meal/drinks, meeting]

\_\_\_ Refuse to Answer

Q1007. When you saw [Response to Q902] that last time, at which of the following places did the close contact occur? (Check all that apply) (Check all that apply)

- Home/someone's house
- Work
- Restaurant or cafe
- Leisure (i.e. a theater, bar, night club)
- School/education
- Exercise or fitness related (i.e., gym, fitness studio)
- Personal service (i.e. haircut, massage)
- Religious service (place of worshiip)
- Community Center/Group
- Park
- Street
- El Bordo/Canal
- Shooting gallery
- Other
- Refuse to Answer

***If Q1007N is equal to 1 then skip to Q1008***

***If not, then skip to instruction before Q1009.***

Q1008. Please specify the place (i.e., name of the place and cross-streets or neighborhood/colonia) where the last close contact wiith [Response to Q902] occurred.

-----

***If Q1007A is equal to 1 then skip to Q1009***

***If not, then skip to instruction before Q1010.***

Q1009. You said the the last close contact with [Response to Q902] occurred at your house/someone else's house. Where is this house located? Could you please provide the name of the cross-streets at the nearest intersection? Interviewer: Please type in the names of the cross-streets. If the participant cannot provide this information, ask them the name of the neighborhood/colonia and type in that info.

-----  
-----

***If Q1007B is equal to 1 then skip to Q1010***

***If not, then skip to instruction before Q1011.***

Q1010. You said that the last close contact with [Response to Q902] occurred at work. Could you please provide the name of the work place and the address? Interviewer: If the work place does not have a name or address, record whatever info the participant can provide for the location (i.e., cross-streets, neighborhood/colonia).

-----  
-----

***If Q1007C is equal to 1 then skip to Q1011***

***If not, then skip to instruction before Q1012.***

Q1011. You said that the last close contact with [Response to Q902] occurred at a restaurant/cafe. Could you please provide the name of this place and the cross-streets/neighborhood/colonia where this restaurant is located?

-----  
-----

***If Q1007D is equal to 1 then skip to Q1012***

***If not, then skip to instruction before Q1013.***

Q1012. You said that the last close contact with [Response to Q902] occurred at a place of leisure (i.e. a theater, bar, night club). Could you please provide the name of the place and the cross-streets/neighborhood/colonia where this place is located?

-----  
-----

***If Q1007E is equal to 1 then skip to Q1013***

***If not, then skip to instruction before Q1014.***

Q1013. You said that the last close contact with [Response to Q902] occurred at a school/education place. Could you please provide the name of this place and the cross-streets/neighborhood/colonia where this place is located?

-----  
-----

***If Q1007F is equal to 1 then skip to Q1014***

***If not, then skip to instruction before Q1015.***

Q1014. You said that the last close contact with [Response to Q902] occurred at a gym/fitness place. Could you please provide the name of this place and the cross streets/neighborhood/colonia where this place is located?

-----  
-----

***If Q1007G is equal to 1 then skip to Q1015***

***If not, then skip to instruction before Q1016.***

Q1015. You said that the last close contact with [Response to Q902] occurred at a personal service (i.e. haircut, massage) place. Could you please provide the name of this place and the cross streets/neighborhood/colonia where this place is located?

-----  
-----

***If Q1007H is equal to 1 then skip to Q1016***

***If not, then skip to instruction before Q1017.***

Q1016. You said that the last close contact with [Response to Q902] occurred at a religious service place. Could you please provide the name of this place and the cross streets/neighborhood/colonia where this place is located?

-----  
-----

***If Q1007I is equal to 1 then skip to Q1017***

***If not, then skip to instruction before Q1018.***

Q1017. You said that the last close contact with [Response to Q902] occurred at a community center/group place. Could you please provide the name of this place and the cross streets/neighborhood/colonia where this place is located?

-----  
-----

*If Q1007J is equal to 1 then skip to Q1018*

*If not, then skip to instruction before Q1019.*

Q1018. You said that the last close contact with [Response to Q902] occurred at a park. Could you please provide the name of this place and the cross streets/neighborhood/colonia where this place is located?

-----  
-----

*If Q1007K is equal to 1 then skip to Q1019*

*If not, then skip to instruction before Q1020.*

Q1019. You said that the last close contact with [Response to Q902] occurred on the street. Could you please provide the name of this street and the neighborhood/colonia where this place is located?

-----  
-----

*If Q1007M is equal to 1 then skip to Q1020*

*If not, then skip to instruction before Q1021.*

Q1020. You said that the last close contact with [Response to Q902] occurred at a shooting gallery. Which shooting gallery did it occur at? (Choose one)

- 01 Las Palmitas/Zona Norte
- 02 Los Pinos/ Zona Norte
- 03 Las Bombas/ Zona Norte
- 04 Los Aragón/ Zona Norte
- 05 La Veinte/ Bordo, Col. Veinte de Noviembre
- 06 El Azteca/ Cerro Colorado
- 07 Oxxo, Calle 5ta Zona Norte
- 08 Bordo/ Los Álamos, Mundo divertido
- 09 Cañón Guerrero/Maclovio Herrera Colonia Guerrero
- 10 Col. Guaycura (casa privada)
- 11 Col. Presidentes (Infonavit edificio)
- 12 Florido 1era Sección (casa privada)
- 13 Florido 1era Sección (Bomberos, conecta)
- 14 Col. Francisco Villa (edificio abandonado)
- 15 Cañón del Pato/ Colonia Villa
- 16 Col. Postal (casa privada)
- 17 Col. del Río (Parte baja, barranco)
- 18 Sánchez Taboada (Av. Sánchez Taboada y Parque Industrial)
- 19 La cima (casa abandonado)
- 20 Otay módulos
- 21 Other
- 98 Refuse to Answer

***If Q1020 is equal to 21 then skip to Q1021***



**If not, then skip to instruction before Q1022.**

Q1021. Please specify the shooting gallery (i.e., name of the place and cross-streets or neighborhood/colonia) where the last close contact with [Response to Q902] occurred.

-----

**If Q1002 is greater than 1 then skip to Q1022**

**If not, then skip to instruction before Q1040.**

Q1022. Please think of a different time that you saw [Response to Q902] in the past 14 days, other than the contact that you just described. By 'time' we mean a contact where you saw [Response to Q902] in person and then separated. How many days ago did that take place?

|       |                         |
|-------|-------------------------|
| __ __ | DAYS                    |
| 98    | Refuse to Answer (Days) |

**If Q1022 is less than MC3FDAY then READ: "This time is more recent than the first day of the last contact. Please make corrections." and skip to Q1022.**

**If Q1002 is greater than 1 then skip to Q1023**

**If not, then skip to Q1024.**

Q1023. During this contact, on how many consecutive days did you see [Response to Q902]?

|       |                  |
|-------|------------------|
| __ __ | days             |
| 98    | Refuse to Answer |

Q1024. When you saw [Response to Q902] that time, what type of contact did you have with them? (Check all that apply) (Check all that apply)

- Physical, non-sexual [i.e. handshake, hug, skin contact, etc.]
- Physical, sexual
- Non-physical [i.e. in-person conversation, meal/drinks, meeting]
- Refuse to Answer

Q1025. When you saw [Response to Q902] that time, at which of the following places did the close contact occur? (Check all that apply) (Check all that apply)

- Home/someone's house
- Work
- Restaurant or cafe
- Leisure (i.e. a theater, bar, night club)
- School/education
- Exercise or fitness related (i.e., gym, fitness studio)
- Personal service (i.e. haircut, massage)
- Religious service (place of worshiip)
- Community Center/Group
- Park
- Street
- El Bordo/Canal
- Shooting gallery
- Other
- Refuse to Answer

***If Q1025N is equal to 1 then skip to Q1026***

***If not, then skip to instruction before Q1027.***

Q1026. Please specify the place (i.e., name of the place and cross-streets or neighborhood/colonia) where that close contact wiith [Response to Q902] occurred.

-----

***If Q1025A is equal to 1 then skip to Q1027***

***If not, then skip to instruction before Q1028.***

Q1027. You said the the last close contact with [Response to Q902] occurred at your house/someone else's house. Where is this house located? Could you please provide the name of the cross-streets at the nearest intersection? Interviewer: Please type in the names of the cross-streets. If the participant cannot provide this information, ask them the name of the neighborhood/colonia and type in that info.

-----  
-----

***If Q1025B is equal to 1 then skip to Q1028***

***If not, then skip to instruction before Q1029.***

Q1028. You said that the last close contact with [Response to Q902] occurred at work. Could you please provide the name of the work place and the address? Interviewer: If the work place does not have a name or address, record whatever info the participant can provide for the location (i.e., cross-streets, neighborhood/colonia).

-----  
-----

***If Q1025C is equal to 1 then skip to Q1029***

***If not, then skip to instruction before Q1030.***

Q1029. You said that the last close contact with [Response to Q902] occurred at a restaurant/cafe. Could you please provide the name of this place and the cross-streets/neighborhood/colonia where this restaurant is located?

-----  
-----

***If Q1025D is equal to 1 then skip to Q1030***

***If not, then skip to instruction before Q1031.***

Q1030. You said that the last close contact with [Response to Q902] occurred at a place of leisure (i.e. a theater, bar, night club). Could you please provide the name of the place and the cross-streets/neighborhood/colonia where this place is located?

-----  
-----

***If Q1025E is equal to 1 then skip to Q1031***

***If not, then skip to instruction before Q1032.***

Q1031. You said that the last close contact with [Response to Q902] occurred at a school/education place. Could you please provide the name of this place and the cross-streets/neighborhood/colonia where this place is located?

-----  
-----

***If Q1025F is equal to 1 then skip to Q1032***

***If not, then skip to instruction before Q1033.***

Q1032. You said that the last close contact with [Response to Q902] occurred at a gym/fitness place. Could you please provide the name of this place and the cross streets/neighborhood/colonia where this place is located?

-----  
-----

***If Q1025G is equal to 1 then skip to Q1033***

***If not, then skip to instruction before Q1034.***

Q1033. You said that the last close contact with [Response to Q902] occurred at a personal service (i.e. haircut, massage) place. Could you please provide the name of this place and the cross streets/neighborhood/colonia where this place is located?

-----  
-----

***If Q1025H is equal to 1 then skip to Q1034***

***If not, then skip to instruction before Q1035.***

Q1034. You said that the last close contact with [Response to Q902] occurred at a religious service place. Could you please provide the name of this place and the cross streets/neighborhood/colonia where this place is located?

-----  
-----

***If Q1025I is equal to 1 then skip to Q1035***

***If not, then skip to instruction before Q1036.***

Q1035. You said that the last close contact with [Response to Q902] occurred at a community center/group place. Could you please provide the name of this place and the cross streets/neighborhood/colonia where this place is located?

-----  
-----

*If Q1025J is equal to 1 then skip to Q1036*

*If not, then skip to instruction before Q1037.*

Q1036. You said that the last close contact with [Response to Q902] occurred at a park. Could you please provide the name of this place and the cross streets/neighborhood/colonia where this place is located?

-----  
-----

*If Q1025K is equal to 1 then skip to Q1037*

*If not, then skip to instruction before Q1038.*

Q1037. You said that the last close contact with [Response to Q902] occurred on the street. Could you please provide the name of this street and the neighborhood/colonia where this place is located?

-----  
-----

*If Q1025M is equal to 1 then skip to Q1038*

*If not, then skip to instruction before Q1039.*

Q1038. You said that the last close contact with [Response to Q902] occurred at a shooting gallery. Which shooting gallery did it occur at? (Choose one)

- 01 Las Palmitas/Zona Norte
- 02 Los Pinos/ Zona Norte
- 03 Las Bombas/ Zona Norte
- 04 Los Aragón/ Zona Norte
- 05 La Veinte/ Bordo, Col. Veinte de Noviembre
- 06 El Azteca/ Cerro Colorado
- 07 Oxxo, Calle 5ta Zona Norte
- 08 Bordo/ Los Álamos, Mundo divertido
- 09 Cañón Guerrero/Maclovio Herrera Colonia Guerrero
- 10 Col. Guaycura (casa privada)
- 11 Col. Presidentes (Infonavit edificio)
- 12 Florido 1era Sección (casa privada)
- 13 Florido 1era Sección (Bomberos, conecta)
- 14 Col. Francisco Villa (edificio abandonado)
- 15 Cañón del Pato/ Colonia Villa
- 16 Col. Postal (casa privada)
- 17 Col. del Río (Parte baja, barranco)
- 18 Sánchez Taboada (Av. Sánchez Taboada y Parque Industrial)
- 19 La cima (casa abandonado)
- 20 Otay módulos
- 21 Other
- 98 Refuse to Answer

***If Q1038 is equal to 21 then skip to Q1039***

***If not, then skip to instruction before Q1040.***

Q1039. Please specify the shooting gallery (i.e., name of the place and cross-streets or neighborhood/colonia) where the last close contact with [Response to Q902] occurred.

-----

***If Q686 + Q707 + Q728 + Q749 + Q770 + Q791 + Q812 + Q833 + Q854 + Q875 is greater than 3 and Q905 is not equal to "Refuse to Answer" and Q905 is not equal to "skipped" then skip to Q1040***

***If not, then skip to instruction before Q1083.***

Q1040. Is [Response to Q905] [Response to Q906] ([Response to Q907]) male, female, transgender, non-binary or another? (Choose one)

- 1 Male
- 2 Female
- 3 Trans female
- 4 Trans male
- 5 Non-binary / genderqueer / gender fluid / agender
- 6 Another gender identity not listed
- 8 Refuse to Answer

***If Q1040 is equal to 6 then skip to Q1041***

***If not, then skip to Q1042.***

Q1041. Please specify the gender identity of [Response to Q905].

-----

- Q1042. Where does [Response to Q905] primarily live? (Choose one)
- 1 Mexico
  - 2 United States
  - 3 Other
  - 7 Don't Know
  - 8 Refuse to Answer

**If Q1042 is equal to 3 then skip to Q1043**

**If not, then skip to Q1044.**

Q1043. Please specify where [Response to Q905] primarily lives.

-----

Q1044. Did you meet [Response to Q905] for the first time in the previous 14 days?

- 1 Yes
- 0 No
- 8 Refuse to Answer

Q1045. How many days have you seen [Response to Q905] in the previous 14 days?

- \_\_\_ Days
- 98 Refuse to Answer

Q1046. On average, on the days that you saw [Response to Q905], how much time (e.g., hours, minutes) did you spend in close contact with him/her? Interviewer: the max amount of time per day is 24 hours.

- \_\_\_ HOURS
- \_\_\_ MINUTES
- 98 Refuse to Answer (Hours)

Q1047. When was the last time you had close contact with [Response to Q905] in the past 14 days? Interviewer: Enter how many days ago the participant had close contact for the last time with the person in question. If the last time was today, enter 0.

- \_\_\_ DAYS
- 98 Refuse to Answer (Days)

**If Q1045 is greater than 1 then skip to Q1048**

**If not, then skip to Q1049.**



Q1048. During that last contact, on how many consecutive days did you see [Response to Q905]?

\_\_\_ days

98 Refuse to Answer

*MC4FDAY = If(Q1047 is equal to 1, Q1047, If(Q1047 is not equal to 98 and Q1047 is greater than 1, Q1047 + Q1048, "missing"))*

Q1049. When you saw [Response to Q905] that last time, what type of contact did you have with them? (Check all that apply) (Check all that apply)

\_\_\_ Physical, non-sexual [i.e. handshake, hug, skin contact, etc.]

\_\_\_ Physical, sexual

\_\_\_ Non-physical [i.e. in-person conversation, meal/drinks, meeting]

\_\_\_ Refuse to Answer

Q1050. When you saw [Response to Q905] that last time, at which of the following places did the close contact occur? (Check all that apply) (Check all that apply)

- Home/someone's house
- Work
- Restaurant or cafe
- Leisure (i.e. a theater, bar, night club)
- School/education
- Exercise or fitness related (i.e., gym, fitness studio)
- Personal service (i.e. haircut, massage)
- Religious service (place of worshiip)
- Community Center/Group
- Park
- Street
- El Bordo/Canal
- Shooting gallery
- Other
- Refuse to Answer

***If Q1050N is equal to 1 then skip to Q1051***

***If not, then skip to instruction before Q1052.***

Q1051. Please specify the place (i.e., name of the place and cross-streets or neighborhood/colonia) where the last close contact wiith [Response to Q905] occurred.

-----

***If Q1050A is equal to 1 then skip to Q1052***

***If not, then skip to instruction before Q1053.***

Q1052. You said the the last close contact with [Response to Q905] occurred at your house/someone else's house. Where is this house located? Could you please provide the name of the cross-streets at the nearest intersection? Interviewer: Please type in the names of the cross-streets. If the participant cannot provide this information, ask them the name of the neighborhood/colonia and type in that info.

-----  
-----

***If Q1050B is equal to 1 then skip to Q1053***

***If not, then skip to instruction before Q1054.***

Q1053. You said that the last close contact with [Response to Q905] occurred at work. Could you please provide the name of the work place and the address? Interviewer: If the work place does not have a name or address, record whatever info the participant can provide for the location (i.e., cross-streets, neighborhood/colonia).

-----  
-----

***If Q1050C is equal to 1 then skip to Q1054***

***If not, then skip to instruction before Q1055.***

Q1054. You said that the last close contact with [Response to Q905] occurred at a restaurant/cafe. Could you please provide the name of this place and the cross-streets/neighborhood/colonia where this restaurant is located?

-----  
-----

***If Q1050D is equal to 1 then skip to Q1055***

***If not, then skip to instruction before Q1056.***

Q1055. You said that the last close contact with [Response to Q905] occurred at a place of leisure (i.e. a theater, bar, night club). Could you please provide the name of the place and the cross-streets/neighborhood/colonia where this place is located?

-----  
-----

***If Q1050E is equal to 1 then skip to Q1056***

***If not, then skip to instruction before Q1057.***

Q1056. You said that the last close contact with [Response to Q905] occurred at a school/education place. Could you please provide the name of this place and the cross-streets/neighborhood/colonia where this place is located?

-----  
-----

***If Q1050F is equal to 1 then skip to Q1057***

***If not, then skip to instruction before Q1058.***

Q1057. You said that the last close contact with [Response to Q905] occurred at a gym/fitness place. Could you please provide the name of this place and the cross streets/neighborhood/colonia where this place is located?

-----  
-----

***If Q1050G is equal to 1 then skip to Q1058***

***If not, then skip to instruction before Q1059.***

Q1058. You said that the last close contact with [Response to Q905] occurred at a personal service (i.e. haircut, massage) place. Could you please provide the name of this place and the cross streets/neighborhood/colonia where this place is located?

-----  
-----

***If Q1050H is equal to 1 then skip to Q1059***

***If not, then skip to instruction before Q1060.***

Q1059. You said that the last close contact with [Response to Q905] occurred at a religious service place. Could you please provide the name of this place and the cross streets/neighborhood/colonia where this place is located?

-----  
-----

***If Q1050I is equal to 1 then skip to Q1060***

***If not, then skip to instruction before Q1061.***

Q1060. You said that the last close contact with [Response to Q905] occurred at a community center/group place. Could you please provide the name of this place and the cross streets/neighborhood/colonia where this place is located?

-----  
-----

*If Q1050J is equal to 1 then skip to Q1061*

*If not, then skip to instruction before Q1062.*

Q1061. You said that the last close contact with [Response to Q905] occurred at a park. Could you please provide the name of this place and the cross streets/neighborhood/colonia where this place is located?

-----  
-----

*If Q1050K is equal to 1 then skip to Q1062*

*If not, then skip to instruction before Q1063.*

Q1062. You said that the last close contact with [Response to Q905] occurred on the street. Could you please provide the name of this street and the neighborhood/colonia where this place is located?

-----  
-----

*If Q1050M is equal to 1 then skip to Q1063*

*If not, then skip to instruction before Q1064.*

Q1063. You said that the last close contact with [Response to Q905] occurred at a shooting gallery. Which shooting gallery did it occur at? (Choose one)

- 01 Las Palmitas/Zona Norte
- 02 Los Pinos/ Zona Norte
- 03 Las Bombas/ Zona Norte
- 04 Los Aragón/ Zona Norte
- 05 La Veinte/ Bordo, Col. Veinte de Noviembre
- 06 El Azteca/ Cerro Colorado
- 07 Oxxo, Calle 5ta Zona Norte
- 08 Bordo/ Los Álamos, Mundo divertido
- 09 Cañón Guerrero/Maclovio Herrera Colonia Guerrero
- 10 Col. Guaycura (casa privada)
- 11 Col. Presidentes (Infonavit edificio)
- 12 Florido 1era Sección (casa privada)
- 13 Florido 1era Sección (Bomberos, conecta)
- 14 Col. Francisco Villa (edificio abandonado)
- 15 Cañón del Pato/ Colonia Villa
- 16 Col. Postal (casa privada)
- 17 Col. del Río (Parte baja, barranco)
- 18 Sánchez Taboada (Av. Sánchez Taboada y Parque Industrial)
- 19 La cima (casa abandonado)
- 20 Otay módulos
- 21 Other
- 98 Refuse to Answer

***If Q1063 is equal to 21 then skip to Q1064***

**If not, then skip to instruction before Q1065.**

Q1064. Please specify the shooting gallery (i.e., name of the place and cross-streets or neighborhood/colonia) where the last close contact with [Response to Q905] occurred.

-----

**If Q1045 is greater than 1 then skip to Q1065**

**If not, then skip to instruction before Q1083.**

Q1065. Please think of a different time that you saw [Response to Q905] in the past 14 days, other than the contact that you just described. By 'time' we mean a contact where you saw [Response to Q905] in person and then separated. How many days ago did that take place?

|       |                         |
|-------|-------------------------|
| __ __ | DAYS                    |
| 98    | Refuse to Answer (Days) |

**If Q1065 is less than MC4FDAY then READ: "This time is more recent than the first day of the last contact. Please make corrections." and skip to Q1065.**

**If Q1045 is greater than 1 then skip to Q1066**

**If not, then skip to Q1067.**

Q1066. During this contact, on how many consecutive days did you see [Response to Q905]?

|       |                  |
|-------|------------------|
| __ __ | days             |
| 98    | Refuse to Answer |

Q1067. When you saw [Response to Q905] that time, what type of contact did you have with them? (Check all that apply) (Check all that apply)

- Physical, non-sexual [i.e. handshake, hug, skin contact, etc.]
- Physical, sexual
- Non-physical [i.e. in-person conversation, meal/drinks, meeting]
- Refuse to Answer

Q1068. When you saw [Response to Q905] that time, at which of the following places did the close contact occur? (Check all that apply) (Check all that apply)

- Home/someone's house
- Work
- Restaurant or cafe
- Leisure (i.e. a theater, bar, night club)
- School/education
- Exercise or fitness related (i.e., gym, fitness studio)
- Personal service (i.e. haircut, massage)
- Religious service (place of worshiip)
- Community Center/Group
- Park
- Street
- El Bordo/Canal
- Shooting gallery
- Other
- Refuse to Answer

***If Q1068N is equal to 1 then skip to Q1069***

***If not, then skip to instruction before Q1070.***

Q1069. Please specify the place (i.e., name of the place and cross-streets or neighborhood/colonia) where that close contact wiith [Response to Q905] occurred.

-----

***If Q1068A is equal to 1 then skip to Q1070***

***If not, then skip to instruction before Q1071.***



Q1070. You said the the last close contact with [Response to Q905] occurred at your house/someone else's house. Where is this house located? Could you please provide the name of the cross-streets at the nearest intersection? Interviewer: Please type in the names of the cross-streets. If the participant cannot provide this information, ask them the name of the neighborhood/colonia and type in that info.

-----  
-----

***If Q1068B is equal to 1 then skip to Q1071***

***If not, then skip to instruction before Q1072.***

Q1071. You said that the last close contact with [Response to Q905] occurred at work. Could you please provide the name of the work place and the address? Interviewer: If the work place does not have a name or address, record whatever info the participant can provide for the location (i.e., cross-streets, neighborhood/colonia).

-----  
-----

***If Q1068C is equal to 1 then skip to Q1072***

***If not, then skip to instruction before Q1073.***

Q1072. You said that the last close contact with [Response to Q905] occurred at a restaurant/cafe. Could you please provide the name of this place and the cross-streets/neighborhood/colonia where this restaurant is located?

-----  
-----

***If Q1068D is equal to 1 then skip to Q1073***

***If not, then skip to instruction before Q1074.***

Q1073. You said that the last close contact with [Response to Q905] occurred at a place of leisure (i.e. a theater, bar, night club). Could you please provide the name of the place and the cross-streets/neighborhood/colonia where this place is located?

-----  
-----

***If Q1068E is equal to 1 then skip to Q1074***

***If not, then skip to instruction before Q1075.***

Q1074. You said that the last close contact with [Response to Q905] occurred at a school/education place. Could you please provide the name of this place and the cross-streets/neighborhood/colonia where this place is located?

-----  
-----

***If Q1068F is equal to 1 then skip to Q1075***

***If not, then skip to instruction before Q1076.***

Q1075. You said that the last close contact with [Response to Q905] occurred at a gym/fitness place. Could you please provide the name of this place and the cross streets/neighborhood/colonia where this place is located?

-----  
-----

***If Q1068G is equal to 1 then skip to Q1076***

***If not, then skip to instruction before Q1077.***

Q1076. You said that the last close contact with [Response to Q905] occurred at a personal service (i.e. haircut, massage) place. Could you please provide the name of this place and the cross streets/neighborhood/colonia where this place is located?

-----  
-----

***If Q1068H is equal to 1 then skip to Q1077***

***If not, then skip to instruction before Q1078.***

Q1077. You said that the last close contact with [Response to Q905] occurred at a religious service place. Could you please provide the name of this place and the cross streets/neighborhood/colonia where this place is located?

-----  
-----

***If Q1068I is equal to 1 then skip to Q1078***

***If not, then skip to instruction before Q1079.***

Q1078. You said that the last close contact with [Response to Q905] occurred at a community center/group place. Could you please provide the name of this place and the cross streets/neighborhood/colonia where this place is located?

-----  
-----

*If Q1068J is equal to 1 then skip to Q1079*

*If not, then skip to instruction before Q1080.*

Q1079. You said that the last close contact with [Response to Q905] occurred at a park. Could you please provide the name of this place and the cross streets/neighborhood/colonia where this place is located?

-----  
-----

*If Q1068K is equal to 1 then skip to Q1080*

*If not, then skip to instruction before Q1081.*

Q1080. You said that the last close contact with [Response to Q905] occurred on the street. Could you please provide the name of this street and the neighborhood/colonia where this place is located?

-----  
-----

*If Q1068M is equal to 1 then skip to Q1081*

*If not, then skip to instruction before Q1082.*

Q1081. You said that the last close contact with [Response to Q905] occurred at a shooting gallery. Which shooting gallery did it occur at? (Choose one)

- 01 Las Palmitas/Zona Norte
- 02 Los Pinos/ Zona Norte
- 03 Las Bombas/ Zona Norte
- 04 Los Aragón/ Zona Norte
- 05 La Veinte/ Bordo, Col. Veinte de Noviembre
- 06 El Azteca/ Cerro Colorado
- 07 Oxxo, Calle 5ta Zona Norte
- 08 Bordo/ Los Álamos, Mundo divertido
- 09 Cañón Guerrero/Maclovio Herrera Colonia Guerrero
- 10 Col. Guaycura (casa privada)
- 11 Col. Presidentes (Infonavit edificio)
- 12 Florido 1era Sección (casa privada)
- 13 Florido 1era Sección (Bomberos, conecta)
- 14 Col. Francisco Villa (edificio abandonado)
- 15 Cañón del Pato/ Colonia Villa
- 16 Col. Postal (casa privada)
- 17 Col. del Río (Parte baja, barranco)
- 18 Sánchez Taboada (Av. Sánchez Taboada y Parque Industrial)
- 19 La cima (casa abandonado)
- 20 Otay módulos
- 21 Other
- 98 Refuse to Answer

***If Q1081 is equal to 21 then skip to Q1082***

**If not, then skip to instruction before Q1083.**

Q1082. Please specify the shooting gallery (i.e., name of the place and cross-streets or neighborhood/colonia) where the last close contact with [Response to Q905] occurred.

-----

**If Q686 + Q707 + Q728 + Q749 + Q770 + Q791 + Q812 + Q833 + Q854 + Q875 is greater than 4 and Q908 is not equal to "Refuse to Answer" and Q908 is not equal to "skipped" then skip to Q1083**

**If not, then skip to instruction before Q1126.**

Q1083. Is [Response to Q908] [MCL5] ([MCN5]) male, female, transgender, non-binary or another? (Choose one)

- 1 Male
- 2 Female
- 3 Trans female
- 4 Trans male
- 5 Non-binary / genderqueer / gender fluid / agender
- 6 Another gender identity not listed
- 8 Refuse to Answer

**If Q1083 is equal to 6 then skip to Q1084**

**If not, then skip to Q1085.**

Q1084. Please specify the gender identity of [Response to Q908].

-----

- Q1085. Where does [Response to Q908] primarily live? (Choose one)
- 1 Mexico
  - 2 United States
  - 3 Other
  - 7 Don't Know
  - 8 Refuse to Answer

**If Q1085 is equal to 3 then skip to Q1086**

**If not, then skip to Q1087.**

Q1086. Please specify where [Response to Q908] primarily lives.

-----

Q1087. Did you meet [Response to Q908] for the first time in the previous 14 days?

- 1 Yes
- 0 No
- 8 Refuse to Answer

Q1088. How many days have you seen [Response to Q908] in the previous 14 days?

- \_\_\_ Days
- 98 Refuse to Answer

Q1089. On average, on the days that you saw [Response to Q908], how much time (e.g., hours, minutes) did you spend in close contact with him/her? Interviewer: the max amount of time per day is 24 hours.

- \_\_\_ HOURS
- \_\_\_ MINUTES
- 98 Refuse to Answer (Hours)

Q1090. When was the last time you had close contact with [Response to Q908] in the past 14 days? Interviewer: Enter how many days ago the participant had close contact for the last time with the person in question. If the last time was today, enter 0.

- \_\_\_ DAYS
- 98 Refuse to Answer (Days)

**If Q1088 is greater than 1 then skip to Q1091**

**If not, then skip to Q1092.**

Q1091. During that last contact, on how many consecutive days did you see [Response to Q908]?

\_\_\_ days

98 Refuse to Answer

***MC5FDAY = If(Q1090 is equal to 1, Q1090, If(Q1090 is not equal to 98 and Q1090 is greater than 1, Q1090 + Q1091, "missing")***

Q1092. When you saw [Response to Q908] that last time, what type of contact did you have with them? (Check all that apply) (Check all that apply)

\_\_\_ Physical, non-sexual [i.e. handshake, hug, skin contact, etc.]

\_\_\_ Physical, sexual

\_\_\_ Non-physical [i.e. in-person conversation, meal/drinks, meeting]

\_\_\_ Refuse to Answer

Q1093. When you saw [Response to Q908] that last time, at which of the following places did the close contact occur? (Check all that apply) (Check all that apply)

- Home/someone's house
- Work
- Restaurant or cafe
- Leisure (i.e. a theater, bar, night club)
- School/education
- Exercise or fitness related (i.e., gym, fitness studio)
- Personal service (i.e. haircut, massage)
- Religious service (place of worshiip)
- Community Center/Group
- Park
- Street
- El Bordo/Canal
- Shooting gallery
- Other
- Refuse to Answer

***If Q1093N is equal to 1 then skip to Q1094***

***If not, then skip to instruction before Q1095.***

Q1094. Please specify the place (i.e., name of the place and cross-streets or neighborhood/colonia) where the last close contact wiith [Response to Q908] occurred.

-----

***If Q1093A is equal to 1 then skip to Q1095***

***If not, then skip to instruction before Q1096.***



Q1095. You said the the last close contact with [Response to Q908] occurred at your house/someone else's house. Where is this house located? Could you please provide the name of the cross-streets at the nearest intersection? Interviewer: Please type in the names of the cross-streets. If the participant cannot provide this information, ask them the name of the neighborhood/colonia and type in that info.

-----  
-----

***If Q1093B is equal to 1 then skip to Q1096***

***If not, then skip to instruction before Q1097.***

Q1096. You said that the last close contact with [Response to Q908] occurred at work. Could you please provide the name of the work place and the address? Interviewer: If the work place does not have a name or address, record whatever info the participant can provide for the location (i.e., cross-streets, neighborhood/colonia).

-----  
-----

***If Q1093C is equal to 1 then skip to Q1097***

***If not, then skip to instruction before Q1098.***

Q1097. You said that the last close contact with [Response to Q908] occurred at a restaurant/cafe. Could you please provide the name of this place and the cross-streets/neighborhood/colonia where this restaurant is located?

-----  
-----

***If Q1093D is equal to 1 then skip to Q1098***

***If not, then skip to instruction before Q1099.***

Q1098. You said that the last close contact with [Response to Q908] occurred at a place of leisure (i.e. a theater, bar, night club). Could you please provide the name of the place and the cross-streets/neighborhood/colonia where this place is located?

-----  
-----

***If Q1093E is equal to 1 then skip to Q1099***

***If not, then skip to instruction before Q1100.***

Q1099. You said that the last close contact with [Response to Q908] occurred at a school/education place. Could you please provide the name of this place and the cross-streets/neighborhood/colonia where this place is located?

-----  
-----

*If Q1093F is equal to 1 then skip to Q1100*

*If not, then skip to instruction before Q1101.*

Q1100. You said that the last close contact with [Response to Q908] occurred at a gym/fitness place. Could you please provide the name of this place and the cross streets/neighborhood/colonia where this place is located?

-----  
-----

*If Q1093G is equal to 1 then skip to Q1101*

*If not, then skip to instruction before Q1102.*

Q1101. You said that the last close contact with [Response to Q908] occurred at a personal service (i.e. haircut, massage) place. Could you please provide the name of this place and the cross streets/neighborhood/colonia where this place is located?

-----  
-----

*If Q1093H is equal to 1 then skip to Q1102*

*If not, then skip to instruction before Q1103.*

Q1102. You said that the last close contact with [Response to Q908] occurred at a religious service place. Could you please provide the name of this place and the cross streets/neighborhood/colonia where this place is located?

-----  
-----

*If Q1093I is equal to 1 then skip to Q1103*

*If not, then skip to instruction before Q1104.*

Q1103. You said that the last close contact with [Response to Q908] occurred at a community center/group place. Could you please provide the name of this place and the cross streets/neighborhood/colonia where this place is located?

-----  
-----

*If Q1093J is equal to 1 then skip to Q1104*

*If not, then skip to instruction before Q1105.*

Q1104. You said that the last close contact with [Response to Q908] occurred at a park. Could you please provide the name of this place and the cross streets/neighborhood/colonia where this place is located?

-----  
-----

*If Q1093K is equal to 1 then skip to Q1105*

*If not, then skip to instruction before Q1106.*

Q1105. You said that the last close contact with [Response to Q908] occurred on the street. Could you please provide the name of this street and the neighborhood/colonia where this place is located?

-----  
-----

*If Q1093M is equal to 1 then skip to Q1106*

*If not, then skip to instruction before Q1107.*

Q1106. You said that the last close contact with [Response to Q908] occurred at a shooting gallery. Which shooting gallery did it occur at? (Choose one)

- 01 Las Palmitas/Zona Norte
- 02 Los Pinos/ Zona Norte
- 03 Las Bombas/ Zona Norte
- 04 Los Aragón/ Zona Norte
- 05 La Veinte/ Bordo, Col. Veinte de Noviembre
- 06 El Azteca/ Cerro Colorado
- 07 Oxxo, Calle 5ta Zona Norte
- 08 Bordo/ Los Álamos, Mundo divertido
- 09 Cañón Guerrero/Maclovio Herrera Colonia Guerrero
- 10 Col. Guaycura (casa privada)
- 11 Col. Presidentes (Infonavit edificio)
- 12 Florido 1era Sección (casa privada)
- 13 Florido 1era Sección (Bomberos, conecta)
- 14 Col. Francisco Villa (edificio abandonado)
- 15 Cañón del Pato/ Colonia Villa
- 16 Col. Postal (casa privada)
- 17 Col. del Río (Parte baja, barranco)
- 18 Sánchez Taboada (Av. Sánchez Taboada y Parque Industrial)
- 19 La cima (casa abandonado)
- 20 Otay módulos
- 21 Other
- 98 Refuse to Answer

***If Q1106 is equal to 21 then skip to Q1107***

**If not, then skip to instruction before Q1108.**

Q1107. Please specify the shooting gallery (i.e., name of the place and cross-streets or neighborhood/colonia) where the last close contact with [Response to Q908] occurred.

-----

**If Q1088 is greater than 1 then skip to Q1108**

**If not, then skip to instruction before Q1126.**

Q1108. Please think of a different time that you saw [Response to Q908] in the past 14 days, other than the contact that you just described. By 'time' we mean a contact where you saw [Response to Q908] in person and then separated. How many days ago did that take place?

|       |                         |
|-------|-------------------------|
| __ __ | DAYS                    |
| 98    | Refuse to Answer (Days) |

**If Q1108 is less than MC5FDAY then READ: "This time is more recent than the first day of the last contact. Please make corrections." and skip to Q1108.**

**If Q1088 is greater than 1 then skip to Q1109**

**If not, then skip to Q1110.**

Q1109. During this contact, on how many consecutive days did you see [Response to Q908]?

|       |                  |
|-------|------------------|
| __ __ | days             |
| 98    | Refuse to Answer |

Q1110. When you saw [Response to Q908] that time, what type of contact did you have with them? (Check all that apply) (Check all that apply)

- Physical, non-sexual [i.e. handshake, hug, skin contact, etc.]
- Physical, sexual
- Non-physical [i.e. in-person conversation, meal/drinks, meeting]
- Refuse to Answer

Q1111. When you saw [Response to Q908] that time, at which of the following places did the close contact occur? (Check all that apply) (Check all that apply)

- Home/someone's house
- Work
- Restaurant or cafe
- Leisure (i.e. a theater, bar, night club)
- School/education
- Exercise or fitness related (i.e., gym, fitness studio)
- Personal service (i.e. haircut, massage)
- Religious service (place of worshiip)
- Community Center/Group
- Park
- Street
- El Bordo/Canal
- Shooting gallery
- Other
- Refuse to Answer

***If Q1111N is equal to 1 then skip to Q1112***

***If not, then skip to instruction before Q1113.***

Q1112. Please specify the place (i.e., name of the place and cross-streets or neighborhood/colonia) where that close contact wiith [Response to Q908] occurred.

-----

***If Q1111A is equal to 1 then skip to Q1113***

***If not, then skip to instruction before Q1114.***

Q1113. You said the the last close contact with [Response to Q908] occurred at your house/someone else's house. Where is this house located? Could you please provide the name of the cross-streets at the nearest intersection? Interviewer: Please type in the names of the cross-streets. If the participant cannot provide this information, ask them the name of the neighborhood/colonia and type in that info.

-----  
-----

***If Q1111B is equal to 1 then skip to Q1114***

***If not, then skip to instruction before Q1115.***

Q1114. You said that the last close contact with [Response to Q908] occurred at work. Could you please provide the name of the work place and the address? Interviewer: If the work place does not have a name or address, record whatever info the participant can provide for the location (i.e., cross-streets, neighborhood/colonia).

-----  
-----

***If Q1111C is equal to 1 then skip to Q1115***

***If not, then skip to instruction before Q1116.***

Q1115. You said that the last close contact with [Response to Q908] occurred at a restaurant/cafe. Could you please provide the name of this place and the cross-streets/neighborhood/colonia where this restaurant is located?

-----  
-----

***If Q1111D is equal to 1 then skip to Q1116***

***If not, then skip to instruction before Q1117.***

Q1116. You said that the last close contact with [Response to Q908] occurred at a place of leisure (i.e. a theater, bar, night club). Could you please provide the name of the place and the cross-streets/neighborhood/colonia where this place is located?

-----  
-----

***If Q1111E is equal to 1 then skip to Q1117***

***If not, then skip to instruction before Q1118.***

Q1117. You said that the last close contact with [Response to Q908] occurred at a school/education place. Could you please provide the name of this place and the cross-streets/neighborhood/colonia where this place is located?

-----  
-----

***If Q1117F is equal to 1 then skip to Q1118***

***If not, then skip to instruction before Q1119.***

Q1118. You said that the last close contact with [Response to Q908] occurred at a gym/fitness place. Could you please provide the name of this place and the cross streets/neighborhood/colonia where this place is located?

-----  
-----

***If Q1118G is equal to 1 then skip to Q1119***

***If not, then skip to instruction before Q1120.***

Q1119. You said that the last close contact with [Response to Q908] occurred at a personal service (i.e. haircut, massage) place. Could you please provide the name of this place and the cross streets/neighborhood/colonia where this place is located?

-----  
-----

***If Q1119H is equal to 1 then skip to Q1120***

***If not, then skip to instruction before Q1121.***

Q1120. You said that the last close contact with [Response to Q908] occurred at a religious service place. Could you please provide the name of this place and the cross streets/neighborhood/colonia where this place is located?

-----  
-----

***If Q1120I is equal to 1 then skip to Q1121***

***If not, then skip to instruction before Q1122.***



Q1121. You said that the last close contact with [Response to Q908] occurred at a community center/group place. Could you please provide the name of this place and the cross streets/neighborhood/colonia where this place is located?

-----  
-----

*If Q1111J is equal to 1 then skip to Q1122*

*If not, then skip to instruction before Q1123.*

Q1122. You said that the last close contact with [Response to Q908] occurred at a park. Could you please provide the name of this place and the cross streets/neighborhood/colonia where this place is located?

-----  
-----

*If Q1111K is equal to 1 then skip to Q1123*

*If not, then skip to instruction before Q1124.*

Q1123. You said that the last close contact with [Response to Q908] occurred on the street. Could you please provide the name of this street and the neighborhood/colonia where this place is located?

-----  
-----

*If Q1111M is equal to 1 then skip to Q1124*

*If not, then skip to instruction before Q1125.*

Q1124. You said that the last close contact with [Response to Q908] occurred at a shooting gallery. Which shooting gallery did it occur at? (Choose one)

- 01 Las Palmitas/Zona Norte
- 02 Los Pinos/ Zona Norte
- 03 Las Bombas/ Zona Norte
- 04 Los Aragón/ Zona Norte
- 05 La Veinte/ Bordo, Col. Veinte de Noviembre
- 06 El Azteca/ Cerro Colorado
- 07 Oxxo, Calle 5ta Zona Norte
- 08 Bordo/ Los Álamos, Mundo divertido
- 09 Cañón Guerrero/Maclovio Herrera Colonia Guerrero
- 10 Col. Guaycura (casa privada)
- 11 Col. Presidentes (Infonavit edificio)
- 12 Florido 1era Sección (casa privada)
- 13 Florido 1era Sección (Bomberos, conecta)
- 14 Col. Francisco Villa (edificio abandonado)
- 15 Cañón del Pato/ Colonia Villa
- 16 Col. Postal (casa privada)
- 17 Col. del Río (Parte baja, barranco)
- 18 Sánchez Taboada (Av. Sánchez Taboada y Parque Industrial)
- 19 La cima (casa abandonado)
- 20 Otay módulos
- 21 Other
- 98 Refuse to Answer

***If Q1124 is equal to 21 then skip to Q1125***

**If not, then skip to instruction before Q1126.**

Q1125. Please specify the shooting gallery (i.e., name of the place and cross-streets or neighborhood/colonia) where the last close contact with [Response to Q908] occurred.

-----

**READ: Now we will ask you about potential changes in contact behaviors related to SARSCoV-2.**

**Try to think back to the time before we were aware of the novel coronavirus epidemic.**

Q1126. How many friends or people that you associated with, who you talked to about things that were important to you do you no longer see due to the pandemic?

\_\_\_\_\_ people  
998 Refuse to Answer

**If Q1126 is greater than 0 and Q1126 is not equal to 998 then skip to Q1127**

**If not, then skip to instruction before Q1135.**

Q1127. Of the people you no longer see, how many were: Sex Partners?

\_\_\_\_\_ people  
998 Refuse to Answer

**If Q1127 is not equal to 998 and Q1127 is greater than Q1126 then READ: "This number is bigger than the total number. Please make corrections." and skip to Q1127.**

**If Q1127 is not equal to 998 and Q1126 is greater than Q1127 then skip to Q1128**

**If not, then skip to instruction before Q1129.**

Q1128. Of the people you no longer see, how many were: Friends?

\_\_\_\_\_ people  
998 Refuse to Answer

**If Q1128 is not equal to 998 and Q1127 is not equal to 998 and Q1128 is greater than Q1126 - Q1127 then READ: "This number is bigger than the total number. Please make corrections." and skip to Q1128.**

**If Q1127 is not equal to 998 and Q1128 is not equal to 998 and Q1126 is greater than Q1127 + Q1128 then skip to Q1129**

**If not, then skip to instruction before Q1130.**

Q1129. Of the people you no longer see, how many were: Neighbor or Housemates?

\_\_\_ \_\_\_ \_\_\_ people  
 998 Refuse to Answer

***If Q1129 is not equal to 998 and Q1127 is not equal to 998 and Q1128 is not equal to 998 and Q1129 is greater than Q1126 - Q1127 - Q1128 then READ: "This number is bigger than the total number. Please make corrections." and skip to Q1129.***

***If Q1127 is not equal to 998 and Q1128 is not equal to 998 and Q1129 is not equal to 998 and Q1126 is greater than Q1127 + Q1128 + Q1129 then skip to Q1130***

***If not, then skip to instruction before Q1131.***

Q1130. Of the people you no longer see, how many were: Co-workers or Bosses?

\_\_\_ \_\_\_ \_\_\_ people  
 998 Refuse to Answer

***If Q1130 is not equal to 998 and Q1127 is not equal to 998 and Q1128 is not equal to 998 and Q1129 is not equal to 998 and Q1130 is greater than Q1126 - Q1127 - Q1128 - Q1129 then READ: "This number is bigger than the total number. Please make corrections." and skip to Q1130.***

***If Q1127 is not equal to 998 and Q1128 is not equal to 998 and Q1129 is not equal to 998 and Q1130 is not equal to 998 and Q1126 is greater than Q1127 + Q1128 + Q1129 + Q1130 then skip to Q1131***

***If not, then skip to instruction before Q1132.***

Q1131. Of the people you no longer see, how many were: Family-relatives by blood or marriage

\_\_\_ \_\_\_ \_\_\_ people  
 998 Refuse to Answer

***If Q1131 is not equal to 998 and Q1130 is not equal to 998 and Q1127 is not equal to 998 and Q1128 is not equal to 998 and Q1129 is not equal to 998 and Q1131 is greater than Q1126 - Q1127 - Q1128 - Q1129 - Q1130 then READ: "This number is bigger than the total number. Please make corrections." and skip to Q1131.***

***If Q1127 is not equal to 998 and Q1128 is not equal to 998 and Q1129 is not equal to 998 and Q1130 is not equal to 998 and Q1131 is not equal to 998 and Q1126 is greater than Q1127 + Q1128 + Q1129 + Q1130 + Q1131 then skip to Q1132***

***If not, then skip to instruction before Q1133.***

Q1132. Of the people you no longer see, how many were: Drug or Alcohol Related

\_\_\_\_\_ people

998 Refuse to Answer

*If Q1132 is not equal to 998 and Q1131 is not equal to 998 and Q1130 is not equal to 998 and Q1127 is not equal to 998 and Q1128 is not equal to 998 and Q1129 is not equal to 998 and Q1132 is greater than Q1126 - Q1127 - Q1128 - Q1129 - Q1130 - Q1131 then READ: "This number is bigger than the total number. Please make corrections." and skip to Q1132.*

*If Q1127 is not equal to 998 and Q1128 is not equal to 998 and Q1129 is not equal to 998 and Q1130 is not equal to 998 and Q1131 is not equal to 998 and Q1132 is not equal to 998 and Q1126 is greater than Q1127 + Q1128 + Q1129 + Q1130 + Q1131 + Q1132 then skip to Q1133*

*If not, then skip to instruction before Q1134.*

Q1133. Of the people you no longer see, how many were: Other

\_\_\_\_\_ people

998 Refuse to Answer

*If Q1133 is not equal to 998 and Q1132 is not equal to 998 and Q1131 is not equal to 998 and Q1130 is not equal to 998 and Q1127 is not equal to 998 and Q1128 is not equal to 998 and Q1129 is not equal to 998 and Q1133 is greater than Q1126 - Q1127 - Q1128 - Q1129 - Q1130 - Q1131 - Q1132 then READ: "This number is bigger than the total number. Please make corrections." and skip to Q1133.*

*If Q1133 is greater than 0 then skip to Q1134*

*If not, then skip to instruction before Q1135.*

Q1134. Please specify.

-----

**READ:** *Now try to remember the two first weeks of February 2020 (or a typical 14 day period in 2020 before we were aware of the novel coronavirus epidemic).*

Q1135. How many people would you normally have had close contact with over those 14 days? Remember, we are interested in people you've had: Non-physical (face-to-face) contact with (within 6ft) that **lasted over an hour** OR Physical contact with. Again, feel free to look through your phone or calendar to jog your memory.

\_\_\_\_\_ people

998 Refuse to Answer

*If Q1135 is greater than 0 and Q1135 is not equal to 998 then skip to Q1136*

***If not, then skip to Q1150.***

Q1136. How many of these close contacts were: Living in the United States?

|       |                  |
|-------|------------------|
| _____ | people           |
| 997   | Don't Know       |
| 998   | Refuse to Answer |

***If Q1136 is not equal to 997 and Q1136 is not equal to 998 and Q1136 is greater than Q1135 then READ: "This number is bigger than the total number. Please make corrections." and skip to Q1136.***

***If Q1135 is greater than Q1136 then skip to Q1137***

***If not, then skip to instruction before Q1138.***

Q1137. How many of these close contacts were: Living in Mexico?

|       |                  |
|-------|------------------|
| _____ | people           |
| 997   | Don't Know       |
| 998   | Refuse to Answer |

***If Q1136 is not equal to 997 and Q1136 is not equal to 998 and Q1137 is not equal to 997 and Q1137 is not equal to 998 and Q1137 is greater than Q1135 - Q1136 then READ: "This number is bigger than the total number. Please make corrections." and skip to Q1137.***

Q1138. How many of these close contacts were: Male?

|       |                  |
|-------|------------------|
| _____ | people           |
| 998   | Refuse to Answer |

***If Q1138 is not equal to 998 and Q1138 is greater than Q1135 then READ: "This number is bigger than the total number. Please make corrections." and skip to Q1138.***

***If Q1135 is greater than Q1138 then skip to Q1139***

***If not, then skip to instruction before Q1140.***

Q1139. How many of these close contacts were: Female?

|       |                  |
|-------|------------------|
| _____ | people           |
| 997   | Don't Know       |
| 998   | Refuse to Answer |

***If Q1138 is not equal to 998 and Q1139 is not equal to 998 and Q1139 is greater than Q1135 - Q1138 then READ: "This number is bigger than the total number. Please make corrections." and skip to Q1139.***

***If Q1135 is greater than Q1138 + Q1139 then skip to Q1140***



Q1143. How many of these close contacts were: Another identity not listed?

|       |                  |
|-------|------------------|
| _____ | people           |
| 997   | Don't Know       |
| 998   | Refuse to Answer |

**If Q1143 is not equal to 998 and Q1142 is not equal to 998 and Q1140 is not equal to 998 and Q1141 is not equal to 998 and Q1143 is greater than Q1135 - Q1140 - Q1141 - Q1142 then READ: "This number is bigger than the total number. Please make corrections." and skip to Q1143.**

**If Q1143 is greater than 0 then skip to Q1144**

**If not, then skip to Q1145.**

Q1144. Please specify.

-----

Q1145. How many of these close contacts were: <18 years old?

|       |                  |
|-------|------------------|
| _____ | people           |
| 997   | Don't Know       |
| 998   | Refuse to Answer |

**If Q1145 is not equal to 997 and Q1145 is not equal to 998 and Q1145 is greater than Q1135 then READ: "This number is bigger than the total number. Please make corrections." and skip to Q1145.**

**If Q1135 is greater than Q1145 then skip to Q1146**

**If not, then skip to instruction before Q1147.**

Q1146. How many of these close contacts were: 18-35 years old?

|       |                  |
|-------|------------------|
| _____ | people           |
| 997   | Don't Know       |
| 998   | Refuse to Answer |

**If Q1145 is not equal to 997 and Q1145 is not equal to 998 and Q1146 is not equal to 997 and Q1146 is not equal to 998 and Q1146 is greater than Q1135 - Q1145 then READ: "This number is bigger than the total number. Please make corrections." and skip to Q1146.**

**If Q1135 is greater than Q1145 + Q1146 then skip to Q1147**

**If not, then skip to instruction before Q1148.**





Q1151. **Interviewer: This is a reminder to provide the participant with a TB referral. Please confirm.**  
(Choose one)

1 Yes

*If Q191 is equal to 1 or Q193 is equal to 1 or Q195 is equal to 1 or Q197 is equal to 1 or Q199 is equal to 1 or Q201 is equal to 1 or Q203 is equal to 1 or Q205 is equal to 1 or Q207 is equal to 1 or Q209 is equal to 1 or Q213 is equal to 1 or Q215 is equal to 1 or Q217 is equal to 1 or Q219 is equal to 1 or Q221 is equal to 1 or Q223 is equal to 1 or Q227 is equal to 1 then skip to Q1152*

*If not, then skip to end of questionnaire.*

Q1152. **Interviewer: This is a reminder to provide the participant with a COVID-19 referral. Please confirm.** (Choose one)

1 Yes

**READ:** *End of survey.*

**Proyecto La Frontera**

# Entrevista Suplemento

Descargo de responsabilidad: Esta entrevista ha sido adaptada para su programación en QDS y no ha sido adaptada para ser administrada con papel y lápiz

IP: Steffanie Strathdee  
10/18/2021

LaFrontera.Supplemental.20210820 (Español)

**READ: La Frontera  
Entrevista suplementaria  
Español**

**VERSION = 20210820**

Q1. Por favor ingresar la fecha de entrevista \_\_\_ / \_\_\_ / \_\_\_ dd / mm / aaaa

**If Q1 is greater than TODAY and TODAY is not equal to "Falta" then READ: "Esa fecha ocurre en el futuro. Verificar respuesta." and skip to Q1.**

Q2. Iniciales del Entrevistador. \_\_\_\_\_

Q3. Ciudad de entrevista.

**Entrevistador, ies crucial que ingrese correctamente el lugar de la entrevista!**

- (Elija Uno)
- |   |           |
|---|-----------|
| 1 | San Diego |
| 2 | Tijuana   |

Q4. Entrevistador, ¿cómo se realizará esta entrevista? (Elija Uno)

- |   |                                                |
|---|------------------------------------------------|
| 1 | En persona, adentro                            |
| 2 | En persona, afuera                             |
| 3 | Por video llamada (por ejemplo: Zoom o Skype)  |
| 4 | Por audio llamada (por ejemplo telefono, Zoom) |
| 5 | Otro                                           |
| 8 | Se rehúsa a contestar                          |

**If Q4 is not equal to 5, then skip to Q6.**

Q5. Por favor especifique de qué otra manera.

\_\_\_\_\_

Q6. ID de Participante (e.g., LF001) \_\_\_\_\_

*ID1 = SubString(Q6, 0, 1)*

*ID2 = SubString(Q6, 1, 1)*

*ID3 = SubString(Q6, 2, 1)*

*ID4 = SubString(Q6, 3, 1)*

*ID5 = SubString(Q6, 4, 1)*

*IDSTUDY = Concatenated(ID1, ID2)*

*If IDSTUDY is not equal to LF then READ: "Verificar ID" and skip to Q6.*

*If ID3 is not equal to 0 and ID3 is not equal to 1 and ID3 is not equal to 2 and ID3 is not equal to 3 and ID3 is not equal to 4 and ID3 is not equal to 5 and ID3 is not equal to 6 and ID3 is not equal to 7 and ID3 is not equal to 8 and ID3 is not equal to 9 or ID4 is not equal to 0 and ID4 is not equal to 1 and ID4 is not equal to 2 and ID4 is not equal to 3 and ID4 is not equal to 4 and ID4 is not equal to 5 and ID4 is not equal to 6 and ID4 is not equal to 7 and ID4 is not equal to 8 and ID4 is not equal to 9 or ID5 is not equal to 0 and ID5 is not equal to 1 and ID5 is not equal to 2 and ID5 is not equal to 3 and ID5 is not equal to 4 and ID5 is not equal to 5 and ID5 is not equal to 6 and ID5 is not equal to 7 and ID5 is not equal to 8 and ID5 is not equal to 9 then READ: "Verificar ID" and skip to Q6.*

Q7. Por favor ingresar ID de SCREENER del participante (ej. LF0001) **NOTA PARA Entrevistador: Por favor no confundir el número de screener con el ID de Participante.**

\_\_\_\_\_

*SCRID1 = SubString(Q7, 0, 1)*

*SCRID2 = SubString(Q7, 1, 1)*

*SCRID3 = SubString(Q7, 2, 1)*

*SCRID4 = SubString(Q7, 3, 1)*

*SCRID5 = SubString(Q7, 4, 1)*

**SCRID6 = SubString(Q7, 5, 1)**

**IDSCREEN = Concatenated(SCRID1, SCRID2)**

**If IDSCREEN is not equal to LF then READ: "Verificar SCRID." and skip to Q7.**

**If SCRID3 is not equal to 0 and SCRID3 is not equal to 1 and SCRID3 is not equal to 2 and SCRID3 is not equal to 3 and SCRID3 is not equal to 4 and SCRID3 is not equal to 5 and SCRID3 is not equal to 6 and SCRID3 is not equal to 7 and SCRID3 is not equal to 8 and SCRID3 is not equal to 9 or SCRID4 is not equal to 0 and SCRID4 is not equal to 1 and SCRID4 is not equal to 2 and SCRID4 is not equal to 3 and SCRID4 is not equal to 4 and SCRID4 is not equal to 5 and SCRID4 is not equal to 6 and SCRID4 is not equal to 7 and SCRID4 is not equal to 8 and SCRID4 is not equal to 9 or SCRID5 is not equal to 0 and SCRID5 is not equal to 1 and SCRID5 is not equal to 2 and SCRID5 is not equal to 3 and SCRID5 is not equal to 4 and SCRID5 is not equal to 5 and SCRID5 is not equal to 6 and SCRID5 is not equal to 7 and SCRID5 is not equal to 8 and SCRID5 is not equal to 9 or SCRID6 is not equal to 0 and SCRID6 is not equal to 1 and SCRID6 is not equal to 2 and SCRID6 is not equal to 3 and SCRID6 is not equal to 4 and SCRID6 is not equal to 5 and SCRID6 is not equal to 6 and SCRID6 is not equal to 7 and SCRID6 is not equal to 8 and SCRID6 is not equal to 9 then READ: "Verificar ID" and skip to Q6.**

- |     |                                               |   |           |
|-----|-----------------------------------------------|---|-----------|
| Q8. | Lugar de entrevista. (Escoja uno) (Elija Uno) | 1 | Tijuana   |
|     |                                               | 2 | San Diego |
|     |                                               | 3 | Otro      |

**If Q8 is equal to 3 then skip to Q9**

**If not, then skip to instruction before Q11.**

Q9. Por favor especifica lugar(ciudad) de entrevista

-----

Q10. Por favor especifica lugar de entrevista en [Response to Q9]

-----  
-----  
-----

**If Q8 is equal to 1 then skip to Q11**

***If not, then skip to instruction before Q13.***

Q11. Lugar de entrevista en Tijuana (escoja solo una) (Elija Uno)

- 1 Tijuana 1 Zona Norte - El Mapa
- 2 Tijuana 2 Coahuila
- 3 Tijuana 3
- 4 Rehab
- 5 Cárcel
- 6 Otro

***If Q11 is equal to 6 then skip to Q12***

***If not, then skip to instruction before Q13.***

Q12. Especifica lugar de entrevista en Tijuana.

-----  
-----  
-----

***If Q8 is equal to 2 then skip to Q13***

***If not, then skip to Q15.***

Q13. Lugar de entrevista en San Diego. (escoja solo una) (Elija Uno)

- 1 San Diego 1
- 2 San Diego 2
- 3 San Diego 3
- 4 Rehab
- 5 Cárcel
- 6 Otro

***If Q13 is equal to 6 then skip to Q14***

***If not, then skip to Q15.***

Q14. Especifica lugar de entrevista en San Diego

-----  
-----  
-----

- Q15. ¿En qué país vives? (**escoja solo una**) (Elija Uno)
- |   |                       |
|---|-----------------------|
| 1 | Estados Unidos        |
| 2 | México                |
| 3 | Otro                  |
| 8 | Se rehúsa a contestar |

***If Q15 is equal to 3 then skip to Q16***

***If not, then skip to instruction before Q17.***

Q16. Especifica el país en dónde vives.

-----  
-----  
-----

***If Q15 is equal to 1 then skip to Q17***

***If not, then skip to instruction before Q19.***



Q17. ¿En qué región de San Diego vives? (**escoja solo una**) (Elija Uno)

- 1 Ciudad de San Diego
- 2 Condado Este (East County)
- 3 Condado Norte de la costa (North County Costal)
- 4 Condado Norte del interior (North County Inland)
- 5 El Sur de la Bahia (South Bay)
- 6 Otra región de San Diego
- 7 No vivo en el condado de San Diego
- 8 Se rehúsa a contestar

*If Q17 is not equal to 6, then skip to instruction before Q19.*

Q18. Por favor especifica la región en donde vives.

-----  
-----  
-----  
-----  
-----  
-----

*If Q15 is equal to 2 then skip to Q19*

*If not, then skip to instruction before Q21.*

- Q19. ¿En qué ciudad vives? (**escoja solo una**) (Elija Uno)
- |   |                       |
|---|-----------------------|
| 1 | Tijuana               |
| 2 | Mexicali              |
| 3 | Ensenada              |
| 4 | Rosarito              |
| 5 | Otro                  |
| 8 | Se rehúsa a contestar |

*If Q19 is not equal to 5, then skip to instruction before Q21.*

Q20. Por favor especifica el nombre de la ciudad en la que vives.

-----  
-----  
-----  
-----  
-----  
-----

*If Q15 is equal to 1 then skip to instruction before Q21*

*If not, then skip to instruction before Q25.*

*If Q8 is equal to 2 then skip to Q21*

*If not, then skip to Q22.*

- Q21. ¿Alguna vez has estado en México?
- |   |                       |
|---|-----------------------|
| 1 | Si                    |
| 0 | No                    |
| 8 | Se rehúsa a contestar |

*If Q21 is not equal to 1, then skip to instruction before Q25.*

- Q22. ¿Alguna vez en su vida ha usado drogas en México? 1 Si  
0 No  
8 Se rehúsa a contestar

*If Q22 is not equal to 1, then skip to instruction before Q24.*

- Q23. ¿Alguna vez en su vida se inyectó drogas en México? 1 Si  
0 No  
8 Se rehúsa a contestar

*If Q23 is not equal to 1, then skip to instruction before Q25.*

- Q24. ¿Cuándo fue la última vez que se inyectó drogas en México?

\_\_\_ / \_\_\_ / \_\_\_\_\_ dd / mm / aaaa  
2098 Se rehúsa a contestar (Año)

*If Q24 is not equal to 2098 and Q24 is not equal to "Saltó" then skip to instruction before Q25*

*If not, then skip to instruction before Q25.*

*INJTMEX = TODAY - Q24*

*If Q8 is equal to 1 and Q15 is equal to 2 then skip to Q25*

*If not, then skip to instruction before Q29.*

- Q25. ¿Alguna vez en su vida ha estado en EUA? 1 Si  
0 No  
8 Se rehúsa a contestar

*If Q25 is not equal to 1, then skip to instruction before Q29.*

- Q26. ¿Alguna vez en tu vida ha usado alguna droga en EUA? 1 Si  
0 No  
8 Se rehúsa a contestar

*If Q26 is not equal to 1, then skip to instruction before Q28.*

- Q27. ¿Alguna vez en su vida se ha inyectado alguna droga en EUA? 1 Si  
0 No  
8 Se rehúsa a contestar

*If Q27 is not equal to 1, then skip to instruction before Q29.*

- Q28. ¿Cuándo fue la última vez que se inyectó alguna droga en EUA?

\_\_\_ / \_\_\_ / \_\_\_\_\_ dd / mm / aaaa  
2098 Se rehúsa a contestar (Año)

*If Q28 is not equal to 2098 and Q28 is not equal to "Saltó" then skip to instruction before Q29*

*If not, then skip to instruction before Q29.*

*INJTUS = TODAY - Q28*

*NDT\_SD = If(Q8 is equal to 2 and (Q17 is equal to 1 or Q17 is equal to 2 or Q17 is equal to 3 or Q17 is equal to 4 or Q17 is equal to 5 or Q17 is equal to 6) and (Q21 is equal to 0 or Q22 is equal to 0), 1, 0)*

*NDT\_TJ = If(Q8 is equal to 1 and Q19 is equal to 1 and (Q25 is equal to 0 or Q26 is equal to 0), 1, 0)*

*DT\_SD = If(NDT\_SD is equal to 0 and NDT\_TJ is equal to 0, 1, 0)*

**READ: LEA: ENTREVISTADOR, POR FAVOR LEER EL SIGUIENTE TEXTO EN VOZ ALTA AL PARTICIPANTE:** Esta entrevista de suplemento es parte de un estudio de investigación sobre VIH/VHC, SARSCoV-2 y sobredosis entre personas que usan drogas inyectables en San Diego y Tijuana. Las preguntas que estaremos haciendo complementan las pregunta que le hicimos durante su primera visita y están relacionadas a alguna información básica sobre usted, su salud de SARSCoV-2 y TB, sus amigos y personas que usted conoce y el uso de servicios de salud y otros servicios, y sus actitudes hacia algunos de estos problemas. Sé que algunas preguntas que haremos pueden ser un poco incomodas de contestar. Quiero recordarle que al igual que en su primera visita, esta entrevista es confidencial, y nosotros no le daremos información personal suya a nadie fuera de este estudio. Nada de lo que nos diga puede ser relacionado con usted como individuo. Es importante que sepa que su participación en este estudio es totalmente voluntaria. No necesita responder alguna pregunta si no quiere, y puede interrumpir la entrevista en cualquier momento. ¿Tiene alguna pregunta antes de comenzar?

Q29. ¿Cuál es su fecha de nacimiento?

\_\_\_ / \_\_\_ / \_\_\_\_\_

dd / mm / aaaa

2098

Se rehúsa a contestar (Año)

**AGE = Age(Q29, TODAY)**

Q30. ¿Qué sexo aparece anotado en su acta de nacimiento? (**Escoja solo uno**) (Elija Uno)

1 Hombre

2 Mujer

3 Intersexual

8 Se rehúsa a contestar

**READ: LEA: LEER A PARTICIPANTE:** Ahora te voy a hacerle algunas preguntas sobre su uso y acceso a agua en su vida diaria.

Q31. En los últimos 6 meses, ¿Cuáles de estas fuentes de agua utilizó para tomar? **Entrevistador: seleccione todas las que apliquen.** (Marque Todas las que Correspondan)

- Agua de la llave/potable privada (llave de casa)
- Agua de la llave/potable privada (llave de vecino, familiar, amigo)
- Agua de la llave pública (parque/gasolinera/afuera de tienda)
- Agua de aspersores (parques públicos)
- Pozo desprotegido
- Pozo protegido
- Fuente natural desprotegida
- Fuente natural protegida
- Agua de lluvia
- Pipa de agua (camión)
- Envasada (embotellada/en bolsita/de garrafón)
- Agua superficial (río/lago/canal)
- Tubos/hoyos dentro del canal del río Tijuana (lloraderos)
- Sin recurso de agua
- Otro
- Se rehúsa a contestar

***If Q31N is equal to 1 and Q31 is not equal to 98 and Q31 is greater than 1 then READ: "Solo puedes escoger la opción "Sin recurso de agua" por si sola, verificar respuesta." and skip to Q31.***

***If Q310 is equal to 1 then skip to Q32***

***If not, then skip to Q33.***

Q32. Dijiste que tuviste acceso a otras fuentes de agua en los últimos 6 meses. Por favor especifica.

-----  
-----  
-----

Q33. ¿Cuál es su fuente principal (la más común) de agua para tomar? **ENTREVISTADOR: escoja solo una** . (Elija Uno)

- 01 Agua entubada privada (llave de casa)
- 02 Agua entubada privada (llave de vecino, familiar, amigo)
- 03 Agua entubada pública (parque/gasolinera/afuera de tienda)
- 04 Agua de aspersores (parques públicos)
- 05 Pozo desprotegido
- 06 Pozo protegido
- 07 Fuente natural desprotegida
- 08 Fuente natural protegida
- 09 Agua de lluvia
- 10 Pipa de agua (camión)
- 11 Envasada (embotellada/en bolsita/de garrafón)
- 12 Agua superficial (río/lago/canal)
- 13 Tubos/hoyos dentro del canal del río Tijuana (lloraderos)
- 14 Sin recurso de agua
- 15 Otro
- 98 Se rehúsa a contestar

*If Q33 is equal to 15 then skip to Q34*

**If not, then skip to Q35.**

Q34. Por favor especifique cuál es su fuente principal (la más común) de agua para tomar.

-----  
-----  
-----

Q35. Su fuente principal de agua para tomar ¿está siempre disponible para usted? (escoger una) (Elija Uno)

- 1 Si, siempre
- 2 El agua está disponible la mayor parte del tiempo
- 3 El agua está disponible a veces
- 4 No, el agua raramente está disponible
- 8 Se rehúsa a contestar

Q36. ¿Cuánto tiempo tardas en conseguir agua para tomar de su fuente principal de agua (caminar de ida, tomar el agua y regresar)? **Entrevistador, si el participante indica que el agua siempre está disponible, ingresar 0.**

\_\_\_ \_\_\_ \_\_\_ HOURS  
\_\_\_ \_\_\_ \_\_\_ MINUTES  
998 Se rehúsa a contestar (Minutes)

Q37. Desde que inició la epidemia de COVID-19 en Marzo 2020, ¿cambió su disponibilidad de agua? (escoge una) (Elija Uno)

- 0 No, es igual
- 1 Si, empeoró
- 2 Si, mejoró
- 8 Se rehúsa a contestar



Q38. En la última semana, ¿cuál fue su principal bebida (más común) cuando tuvo sed? (escoge una) (Elija Uno)

- 01 Agua
- 02 Agua mineral
- 03 Leche
- 04 Café
- 05 Té
- 06 Jugo/bebidas azucaradas
- 07 Soda
- 08 Bebidas alcohólicas
- 09 Ninguno
- 10 Otro
- 98 Se rehúsa a contestar

*If Q38 is equal to 10 then skip to Q39*

*If not, then skip to Q40.*

Q39. Por favor especifique cuál es su bebida principal.

-----  
-----  
-----

Q40. En la última semana, ¿con qué frecuencia tuvo sed y no tenía agua? (escoge una) (Elija Uno)

- 1 Varias veces al día
- 2 Diario
- 3 Varias veces en la semana
- 4 Una vez
- 5 Nunca
- 8 Se rehúsa a contestar

Q41. En la última semana, ¿cuántos vasos de agua tomó por día? (escoge una) (Elija Uno)

- 01 1 vaso=250 ml/8 oz
- 02 2 vasos=500 ml/16 oz
- 03 3 vasos =750 ml/24 oz
- 04 4 vasos =1 ltr/32 oz
- 05 5 vasos =1.25 ltr/40 oz
- 06 6 vasos =1.5 ltr/48 oz
- 07 7 vasos =1.75 ltr/52oz
- 08 8 vasos =2 ltr/64 oz
- 09 9 vasos =2.25 ltr/72 oz
- 10 Más de 9 vasos por día
- 98 Se rehúsa a contestar

***If Q41 is equal to 10 then skip to Q42***

***If not, then skip to Q43.***

Q42. Por favor especifique cuántos vasos de agua tomó por día.

— —

98 Se rehúsa a contestar

Q43. En la última semana, ¿cuánto dinero gastó en agua para tomar? *Entrevistador, por favor ingresa la cantidad.*

— — — — —

99998 Se rehúsa a contestar

*If Q43 is not equal to 99998 and Q43 is not equal to 0 then skip to Q44*

*If not, then skip to Q45.*

Q44. Entrevistador, por favor ingresa el **tipo de moneda.** (Elija Uno)

1 Dólares

2 Pesos

8 Se rehúsa a contestar

Q45. En los últimos 6 meses, ¿cuáles fuentes de agua utilizó para lavarse las manos?  
**Entrevistador escoja todas las que apliquen.** (Marque Todas las que Correspondan)

- Agua de la llave/potable privada (llave de casa)
- Agua de la llave/potable privada (llave de vecino, familiar, amigo)
- Agua de la llave pública (parque/gasolinera/afuera de tienda)
- Agua de aspersores (parques públicos)
- Pozo desprotegido
- Pozo protegido
- Fuente natural desprotegida
- Fuente natural protegida
- Agua de lluvia
- Pipa de agua (camión)
- Envasada (embotellada/en bolsita/de garrafón)
- Agua superficial (río/lago/canal)
- Tubos/hoyos dentro del canal del río Tijuana (lloraderos)
- Sin recurso de agua
- Otro
- Se rehúsa a contestar

***If Q45N is equal to 1 and Q45 is not equal to 98 and Q45 is greater than 1 then READ:  
"Solo puedes escoger la opcion "Sin recurso de agua" por si sola, verificar respuesta." and  
skip to Q45.***

***If Q45O is equal to 1 then skip to Q46***

***If not, then skip to Q47.***

Q46. Usted mencionó que usa otra fuente de agua para lavarse las manos. Por favor especifique.

-----  
-----  
-----

Q47. ¿Cuál es su fuente principal de agua para lavarse las manos (la más común)?

**ENTREVISTADOR: elija solo una.** (Elija Uno)

- 01 Agua entubada privada (llave de casa)
- 02 Agua entubada privada (llave de vecino, familiar, amigo)
- 03 Agua entubada pública (parque/gasolinera/afuera de tienda)
- 04 Agua de aspersores (parques públicos)
- 05 Pozo desprotegido
- 06 Pozo protegido
- 07 Fuente natural desprotegida
- 08 Fuente natural protegida
- 09 Agua de lluvia
- 10 Pipa de agua (camión)
- 11 Envasada (embotellada/en bolsita/de garrafón)
- 12 Agua superficial (río/lago/canal)
- 13 Tubos/hoyos dentro del canal del río Tijuana (lloraderos)
- 14 Sin recurso de agua
- 15 Otro
- 98 Se rehúsa a contestar

*If Q47 is equal to 15 then skip to Q48*

***If not, then skip to Q49.***

Q48. Por favor especifique su fuente principal de agua para lavarse las manos.

-----  
-----  
-----

Q49. ¿Con qué frecuencia está disponible para usted esta fuente (principal) de agua para el lavarse las manos? (Elija Uno)

- 1 Siempre
- 2 Usualmente
- 3 A veces
- 4 Raramente
- 5 Nunca
- 8 Se rehúsa a contestar

Q50. ¿Con qué frecuencia tiene jabón disponible para usted? (escoja uno) (Elija Uno)

- 1 Siempre
- 2 Usualmente
- 3 A veces
- 4 Raramente
- 5 Nunca
- 8 Se rehúsa a contestar

Q51. ¿Con qué frecuencia puede lavarse las manos con agua y jabón en un día promedio? (escoja uno) (Elija Uno)

- 1 Siempre
- 2 Usualmente
- 3 A veces
- 4 Raramente
- 5 Nunca
- 8 Se rehúsa a contestar

Q52. Desde que inició la epidemia de COVID-19, ¿cambió su disponibilidad de jabón? (escoja uno) (Elija Uno)

- 0 No, es lo mismo
- 1 Si, empeoro
- 2 Si, mejoro
- 8 Se rehúsa a contestar

Q53. ¿Con qué frecuencia está disponible el gel antibacterial a base de alcohol para usted? (escoja uno) (Elija Uno)

- 1 Siempre
- 2 Usualmente
- 3 A veces
- 4 Raramente
- 5 Nunca
- 8 Se rehúsa a contestar

Q54. En la última semana, ¿qué tan seguido lavó sus manos (con agua y jabón) después de hacer del baño (defecar)? (escoja uno) (Elija Uno)

- 1 Siempre
- 2 Usualmente
- 3 A veces
- 4 Raramente
- 5 Nunca
- 8 Se rehúsa a contestar

Q55. En la última semana, ¿qué tan seguido lavó sus manos (con agua y jabón) antes de comer? (escoja uno) (Elija Uno)

- 1 Siempre
- 2 Usualmente
- 3 A veces
- 4 Raramente
- 5 Nunca
- 8 Se rehúsa a contestar



Q56. En la última semana, ¿qué tan seguido lavó sus manos (con agua y jabón) antes de preparar comida? (escoja uno) (Elija Uno)

- 1 Siempre
- 2 Usualmente
- 3 A veces
- 4 Raramente
- 5 Nunca
- 8 Se rehúsa a contestar

Q57. ¿Cuál es su fuente principal de agua para bañarse (la más común)? **ENTREVISTADOR: elija solo una.** (Elija Uno)

- 01 Agua entubada privada (llave de casa)
- 02 Agua entubada privada (llave de vecino, familiar, amigo)
- 03 Agua entubada pública (parque/gasolinera/afuera de tienda)
- 04 Agua de aspersores (parques públicos)
- 05 Pozo desprotegido
- 06 Pozo protegido
- 07 Fuente natural desprotegida
- 08 Fuente natural protegida
- 09 Agua de lluvia
- 10 Pipa de agua (camión)
- 11 Envasada (embotellada/en bolsita/de garrafón)
- 12 Agua superficial (río/lago/canal)
- 13 Tubos/hoyos dentro del canal del río Tijuana (lloraderos)
- 14 Sin recurso de agua
- 15 Otro
- 98 Se rehúsa a contestar

*If Q57 is equal to 15 then skip to Q58*

*If not, then skip to Q59.*

Q58. Por favor especifique qué fuente principal de agua utiliza para bañarse.

-----  
-----  
-----

Q59. En la última semana, ¿cuántas veces se bañó/lavó?      — —

98      Se rehúsa a contestar

Q60. ¿Cuál es la principal fuente de agua que utiliza para limpiar heridas/abscesos? **Entrevistador: elija solo una.** (Elija Uno)

- 01 Agua de la llave/potable privada (llave de casa)
- 02 Agua de la llave/potable privada (llave de vecino, familiar, amigo)
- 03 Agua de la llave pública (parque/gasolinera/afuera de tienda)
- 04 Agua de aspersores (parques públicos)
- 05 Pozo desprotegido
- 06 Pozo protegido
- 07 Fuente natural desprotegida
- 08 Fuente natural protegida
- 09 Agua de lluvia
- 10 Pipa de agua (camión)
- 11 Envasada (embotellada/en bolsita/de garrafón)
- 12 Agua superficial (río/lago/canal)
- 13 Tubos/hoyos dentro del canal del río Tijuana (lloraderos)
- 14 Sin recurso de agua
- 15 Otro
- 98 Se rehúsa a contestar

***If Q60 is equal to 15 then skip to Q61***

***If not, then skip to Q62.***

Q61. Mencionó que usa otra fuente de agua para limpiar heridas/abscesos. Por favor especifique.

-----  
-----  
-----

Q62. ¿Cuál es su principal fuente de agua para preparar drogas para inyectarse? **Entrevistador: elija solo una.** (Elija Uno)

- 01 Agua entubada privada (llave de casa)
- 02 Agua entubada privada (llave de vecino, familiar, amigo)
- 03 Agua entubada pública (parque/gasolinera/afuera de tienda)
- 04 Agua de aspersores (parques públicos)
- 05 Pozo desprotegido
- 06 Pozo protegido
- 07 Fuente natural desprotegida
- 08 Fuente natural protegida
- 09 Agua de lluvia
- 10 Pipa de agua (camión)
- 11 Envasada (embotellada/en bolsita/de garrafón)
- 12 Agua superficial (río/lago/canal)
- 13 Tubos/hoyos dentro del canal del río Tijuana (lloraderos)
- 14 Sin recurso de agua
- 15 Otro
- 98 Se rehúsa a contestar

***If Q62 is equal to 15 then skip to Q63***

***If not, then skip to Q64.***

Q63. Mencionó que usa otra fuente de agua para preparar drogas para inyectarte. Por favor especifique cuál.

-----  
-----  
-----

Q64. En la última semana, ¿cuánto dinero gastó en higiene personal (jabón, agua, baños, lavandería, higiene menstrual)? ***Entrevistador, por favor ingresa la cantidad.***

-----

99998 Se rehúsa a contestar

***If Q64 is not equal to 99998 and Q64 is not equal to 0 then skip to Q65***

***If not, then skip to instruction before Q66.***

Q65. Entrevistador, por favor ingresa el **tipo de moneda.** (Elija Uno)

|   |                       |
|---|-----------------------|
| 1 | Dólares               |
| 2 | Pesos                 |
| 8 | Se rehúsa a contestar |

***If Q30 is equal to 2 or Q30 is equal to 3 then skip to Q66***

***If not, then skip to instruction before Q67.***

|                                                  |   |                       |
|--------------------------------------------------|---|-----------------------|
| Q66. ¿Alguna vez ha tenido períodos menstruales? | 1 | Si                    |
|                                                  | 0 | No                    |
|                                                  | 8 | Se rehúsa a contestar |

***If Q66 is equal to 1 then skip to Q67***

***If not, then skip to instruction before Q69.***

Q67. ¿Hace cuánto tiempo fue su último periodo menstrual? **Entrevistador, ingrese el número en el apartado correspondiente.**

- — — AÑOS
- — — MESES
- — — DÍAS
- 997 No Sabe (Meses)
- 998 Se rehúsa a contestar (Meses)

Q68. Durante su último período menstrual, ¿qué productos de higiene femenina usó? **Entrevistador, escoja todas las que apliquen.** (Marque Todas las que Correspondan)

- Trapo/tela
- Toalla sanitaria reutilizable
- Toalla sanitaria desechable
- Tampones
- Copa menstrual
- Papel de baño
- Ropa interior sola
- Nada
- Otro (especificar)
- N/A (No tengo menstruación)
- Se rehúsa a contestar

***If Q68I is equal to 1 then skip to Q69***

***If not, then skip to Q70.***

Q69. Por favor especifique qué materiales de higiene usó durante su último período menstrual.

-----  
-----  
-----

Q70. En los últimos 6 meses, ¿cuáles de estos tipo de baños/sanitarios usó? **Entrevistador, Escoja todas las que apliquen** (Marque Todas las que Correspondan)

- Escusado conectado al drenaje/utilizando cubeta
- Letrina de pozo con loza
- Letrina de pozo sin loza/pozo abierto
- Baño de compostaje
- Baño portátil (contenedor)
- Cubeta
- Inodoro/letrina colgante
- Ninguno (defecación al aire libre)
- Otro
- Se rehúsa a contestar

***If Q70I is equal to 1 then skip to Q71***

***If not, then skip to Q72.***

Q71. Por favor especifique qué otro tipo de baño/sanitario usó en los últimos 6 meses.

-----  
-----  
-----



Q72. De estos tipos de baños que mencionó, ¿Cuáles es el que más comúnmente usa? (escoge uno)  
(Elija Uno)

- 01 Escusado conectado al drenaje/utilizando cubeta
- 02 Letrina de pozo con loza
- 03 Letrina de pozo sin loza/pozo abierto
- 04 Baño de compostaje
- 05 Contenedor (baño portátil)
- 06 Cubeta
- 07 Inodoro/letrina colgante
- 08 Ninguno (defecación al aire libre/en la calle o callejón)
- 09 Otro
- 98 Se rehúsa a contestar

*If Q72 is equal to 9 then skip to Q73*

*If not, then skip to Q74.*

Q73. Por favor especifique qué tipo de baño/sanitario usa más comúnmente.

-----  
-----  
-----

Q74. ¿Este baño/sanitario (principal) lo comparte con personas de otras viviendas que usted conoce o con el público en general? (Elija Uno) (Elija Uno)

- 1 Compartido con más de una vivienda que conozco
- 2 Público en general
- 3 No lo comparte
- 8 Se rehúsa a contestar
- 9 No Corresponde

Q75. ¿Con qué frecuencia este baño/sanitario (principal) está disponible (abierto y sin llave)? (Elija Uno) (Elija Uno)

- 1 Siempre
- 2 Usualmente
- 3 A veces
- 4 Raramente
- 5 Nunca
- 8 Se rehúsa a contestar
- 9 No Corresponde

Q76. ¿Con qué frecuencia este baño/sanitario (principal) funciona? (Elija Uno) (Elija Uno)

- 1 Siempre
- 2 Usualmente
- 3 A veces
- 4 Raramente
- 5 Nunca
- 8 Se rehúsa a contestar
- 9 No Corresponde

Q77. ¿Con qué frecuencia este baño/sanitario (principal) es privado? (Elija Uno) (Elija Uno)

- 1 Siempre
- 2 Usualmente
- 3 A veces
- 4 Raramente
- 5 Nunca
- 8 Se rehúsa a contestar
- 9 No Corresponde

Q78. ¿Cuánto tiempo se tarda en llegar caminando al baño/sanitario (principal)? (Entrevistador: si el participante indica que no tiene que caminar al baño/sanitario principal, escriba 0)

- — — HOURS
- — — MINUTES
- 998 Se rehúsa a contestar (Minutes)
- 999 No Corresponde (Minutes)

Q79. ¿Alguna vez ha experimentado acoso o violencia usando el baño (escusado)?

- 1 Si
- 0 No
- 8 Se rehúsa a contestar
- 9 No Corresponde

*If Q79 is equal to 1 then skip to Q80*

*If not, then skip to instruction before Q81.*

Q80. ¿Qué tipos de acoso o violencia ha sufrido cuando usa el baño (escusado)? **Entrevistador, selecciona todas las que apliquen.** (Marque Todas las que Correspondan)

- Ataque físico
- Ataque sexual
- Ataque verbal
- Robo
- Arresto
- Otro tipo de acoso/violencia
- Se rehúsa a contestar
- No Corresponde

*If Q80F is equal to 1 then skip to Q81*

*If not, then skip to Q82.*

Q81. Por favor especifique qué otros tipos de acoso o violencia ha sufrido usando el baño (escusado).

-----  
-----  
-----

Q82. En la última semana, ¿cuántas veces hizo del baño (defecó) al aire libre?

-----  
998 Se rehúsa a contestar

Q83. En la última semana, ¿cuánto dinero gastó usando el baño/sanitario? *Entrevistador, ingrese cantidad.*

-----  
99998 Se rehúsa a contestar

*If Q83 is not equal to 99998 and Q83 is not equal to 0 then skip to Q84*

*If not, then skip to instruction before Q85.*

Q84. Entrevistador, por favor ingresa el **tipo de moneda**. (Elija Uno)

1 Dólares  
2 Pesos  
8 Se rehúsa a contestar

**READ: LEA AL PARTICIPANTE: El COVID-19 es una enfermedad nueva, causada por un coronavirus nuevo que no se había visto antes en los seres humanos. Le voy a hacer algunas preguntas sobre signos o síntomas que Ud. haya podido tener en las últimas 2 semanas. También le preguntaremos sobre sus actividades diarias, trabajo y su adaptación a la situación actual.**

**READ: LEA AL PARTICIPANTE: Ahora te vamos a preguntar sobre cómo el COVID-19 y los cambios en tu comunidad han afectado tu vida y tu salud.**

Q85. ¿Qué está haciendo/hizo durante la pandemia de COVID-19 para protegerse a sí mismo y a otros? **(Entrevistador: Lea en voz alta el listado y marque todas las que apliquen).**  
(Marque Todas las que Correspondan)

- Prac
- Aisla
- Cuid
- Trab
- No t
- Seg
- Cam
- May
- Cub
- Evita
- No h
- Se r

*If Q85L is equal to 1 and Q85 is greater than 1 then READ: ""Ningún cambio en mi vida o mi comportamiento" no se puede seleccionar en conjunto con otras opciones. Lo regresaremos para que realice las correcciones necesarias." and skip to Q85.*

Q86. ¿Qué tanto afecta/afectó la pandemia de COVID-19 a su vida cotidiana? (Escoja una) (Elija Uno)

1 De ningún modo

2 Un poco

3 Bastante

4 Muchísimo

5 Extremadamente

8 Se rehúsa a contestar

Q87. En las últimas 2 semanas, debido a la pandemia de COVID-19, yo (me) he:  
**(Entrevistador lea en voz alta y seleccione todos los que correspondan. Si ninguno aplica, ir a la siguiente pantalla)** (Marque Todas las que Correspondan)

- Abastecido de alcohol
- Abastecido de drogas ilícitas
- Abastecido de suministros para la reducción de daños (agujas limpias, equipo de inyección)
- Evitado compartir cigarrillos, porros o cigarrillos electrónicos / vaporizadores (más de lo habitual)
- Evitado compartir pipas de crack, pipas de metanfetamina o bongas (más de lo habitual)
- Evitado compartir bebidas con otros (más de lo habitual)
- Evitado albergues
- Evitados sitios de distribución de jeringas
- Evitado recoger medicamentos para el trastorno por uso de opioides (MTUO)
- Evitado recoger otros medicamentos
- Evitado atención médica (por ejemplo, citas médicas, hospitales, clínicas de salud)
- Dejar de fumar
- Accedido a tratamientos para el trastorno por consumo de alcohol
- Otro
- Se rehúsa a contestar

***If Q87N is equal to 1 then skip to Q88***

***If not, then skip to Q89.***

Q88. Por favor especifique qué más ha hecho en las últimas 2 semanas, debido a la pandemia de COVID-19.

-----  
-----



Q89. ¿Ha sido impactado tu acceso a comida en las últimas 2 semanas? (Escoge todas las que apliquen) (Marque Todas las que Correspondan)

- \_\_\_ No,
- \_\_\_ Si, n
- \_\_\_ Si, h
- \_\_\_ Si, n
- \_\_\_ Si, n
- \_\_\_ Se r

***If Q89A is equal to 1 and Q89 is greater than 1 then READ: "Seleccionaste la opcion "No" y tambien la opcion "Si." Por favor regresar y revisar la respuesta." and skip to Q89.***

***If Q89F is equal to 1 then skip to Q90***

***If not, then skip to instruction before Q91.***

Q90. Por favor, especifique de qué otra forma ha sido afectado su acceso a los alimentos.

-----  
-----  
-----

**SARSCoV-2 COMPONENT: Inseguridad Alimentaria de la Encuesta de Inseguridad Alimentaria para Adultos del USDA**

**READ: LEA AL PARTICIPANTE:** *Ahora le voy a leer algunas declaraciones que las personas han hecho sobre situaciones alimentarias. Para estas declaraciones, por favor dígame si fue cierto a menudo, a veces, o nunca fue cierto (para Ud./las personas con quien vive), eso es desde que la pandemia de COVID-19 comenzó en Marzo 2020.*

Q91. La primera declaración es: Me preocupaba que (mi/nuestra) comida se pudiera acabar antes de que tuviera dinero para comprar más, ¿Esto fue cierto a menudo, a veces, o nunca fue cierto para usted desde que comenzó la pandemia de COVID en Marzo de 2020? (Escoja una) (Elija Uno)

- 1 Fue cierto a menudo
- 2 A veces fue cierto
- 3 Nunca fue cierto
- 8 Se rehúsa a contestar

Q92. La comida que compré no duró lo suficiente, y no tenía dinero para comprar más. (Elija Uno)

- 1 Fue cierto a menudo
- 2 A veces fue cierto
- 3 Nunca fue cierto
- 8 Se rehúsa a contestar

Q93. No tenía recursos suficientes para comer comida variada y nutritiva. (Elija Uno)

- 1 Fue cierto a menudo
- 2 A veces fue cierto
- 3 Nunca fue cierto
- 8 Se rehúsa a contestar

Q94. Desde que comenzó la pandemia de COVID en Marzo de 2020, ¿Usted redujo alguna vez la cantidad de sus comidas o tuvo que dejar de comer porque le faltaba dinero para alimentos?

- 1 Si
- 0 No
- 8 Se rehúsa a contestar

*If Q94 is equal to 1 then skip to Q95*

*If not, then skip to Q96.*

Q95. ¿Con qué frecuencia sucedió esto? (Escoja una) (Elija Uno)

- 1 Casi todos los meses
- 2 Algunos meses pero no todos
- 3 Solamente en 1 ó 2 meses
- 8 Se rehúsa a contestar

Q96. Desde que comenzó la pandemia de COVID en Marzo de 2020, ¿comió Ud. alguna vez menos de lo que pensaba que debía comer porque le faltaba dinero para alimentos?

- 1 Si
- 0 No
- 8 Se rehúsa a contestar

Q97. Desde que comenzó la pandemia de COVID en Marzo de 2020, ¿Tuvo Ud. hambre alguna vez pero no comió porque le faltaba dinero para alimentos?

- 1 Si
- 0 No
- 8 Se rehúsa a contestar

Q98. Desde que comenzó la pandemia de COVID en Marzo de 2020, ¿Perdió Ud. peso porque no comió los alimentos suficientes por falta de dinero para comida?

- 1 Si
- 0 No
- 8 Se rehúsa a contestar

Q99. Desde que comenzó la pandemia de COVID en Marzo de 2020, ¿alguna vez no comió Ud. en todo el día porque le faltaba dinero para comida?

- 1 Si
- 0 No
- 8 Se rehúsa a contestar

*If Q99 is equal to 1 then skip to Q100*

*If not, then skip to Q101.*

Q100. ¿Con qué frecuencia sucedió esto? (escoja uno) (Elija Uno)

- 1 Casi todos los meses
- 2 Algunos meses pero no todos
- 3 Solamente en 1 ó 2 meses
- 8 Se rehúsa a contestar

Q101. ¿Sigue alguna dieta especial (por ejemplo: baja en colesterol, vegana, vegetariana, paleo, para bajar de peso, orgánica, etc.)?

- 1 Si
- 0 No
- 8 Se rehúsa a contestar

*If Q101 is equal to 1 then skip to Q102*

*If not, then skip to Q103.*

Q102. Por favor especifique qué dieta.

-----

Q103. ¿Tiene Ud. alguna de las siguientes condiciones crónicas

**Entrevistador: Si ninguna de las opciones corresponden, no indique nada y siga con la siguiente pantalla.** (Marque Todas las que Correspondan)

- Alergias de temporada
- Asma u otros problemas pulmonares
- Problemas cardíacos
- Problemas renales
- Desórdenes inmunológicos
- Diabetes o niveles elevados de azúcar en sangre
- Cáncer
- Artritis
- Dolores de cabeza fuertes o frecuentes
- Epilepsia o ataques
- Problemas de intestinos o estomacales serios
- Problemas de acné o de piel serios
- Hipertensión
- Enfermedad Crónica obstructiva Pulmonar (EPOC)
- Congestión Cardíaca
- Fibrilacion Atrial o Flutter Atrial
- Enfermedad Cardíaca/Infarto de Miocardio
- Derrame cerebral
- Cualquier enfermedad autoinmune
- VIH
- Trombosis de vena profunda
- Embolismo pulmonar

\_\_\_ Se rehúsa a contestar

- Q104. ¿Ha tomado antibióticos en los últimos 6 meses?
- |   |                       |
|---|-----------------------|
| 1 | Si                    |
| 0 | No                    |
| 8 | Se rehúsa a contestar |

*If Q104 is equal to 1 then skip to Q105*

*If not, then skip to Q106.*

- Q105. ¿Por favor especifique para qué problema de salud está tomando antibióticos?

-----

- Q106. ¿Ha estado expuesto a alguien que probablemente tenga Coronavirus/COVID-19? (Marque Todas las que Correspondan)

- \_\_\_ Si, alguien que tuvo una prueba positiva
- \_\_\_ Si, alguien con un diagnóstico de médico pero sin prueba
- \_\_\_ Si, alguien con posibles síntomas, pero sin diagnóstico de doctor
- \_\_\_ No
- \_\_\_ Se rehúsa a contestar

*If Q106D is equal to 1 and Q106A + Q106B + Q106C is greater than 0 then READ: "Solo puedes escoger la opcion "No" por si sola, verificar respuesta." and skip to Q106.*

Q107. ¿De dónde obtiene Ud. información sobre COVID19/el coronavirus? **(Entrevistador: indique todas las que correspondan, si no se indica ninguna, siga con la siguiente pantalla)**  
(Marque Todas las que Correspondan)

- Amistades
- Doctores/Profesionales de la salud
- Radio/TV Conservadora (Fox, Red Una América, El Informe Drudge)
- Radio/TV Liberal (CNN, MSNBC, Huffington Post, NPR)
- Medios sociales (Facebook, YouTube, Twiter)
- Se rehúsa a contestar

Q108. ¿Cuál de estas fuentes de información sobre COVID19 e más importante para Ud? (Elija Uno)

- 1 Amistades
- 2 Doctores/Profesionales de la salud
- 3 Radio/TV Conservadora (Fox, Red Una América, El Informe Drudge)
- 4 Radio/TV Liberal (CNN, MSNBC, Huffington Post, NPR)
- 5 Medios sociales (Facebook, YouTube, Twiter)
- 8 Se rehúsa a contestar

**READ: Ahora le voy a leer algunas oraciones sobre COVID-19. Por favor quiero que me diga si a ud. le parece que la oración es verdadera, falsa o si no está seguro.**

Q109. La industria farmacéutica fue quien creó el virus COVID-19. (Elija Uno)

- 1 Verdadero
- 2 Falso
- 3 No estoy seguro
- 8 Se rehúsa a contestar



Q110. El coronavirus fué creado por el gobierno Chino como un arma biológica. (Elija Uno)

- 1 Verdadero
- 2 Falso
- 3 No estoy seguro
- 8 Se rehúsa a contestar

Q111. Algunas personas en el gobierno de EUA están exagerando el riesgo que representa el COVID19. (Elija Uno)

- 1 Verdadero
- 2 Falso
- 3 No estoy seguro
- 8 Se rehúsa a contestar

Q112. Las vacunas que se le dan a los niños para enfermedades como la varicela y paperas causan autismo. (Elija Uno)

- 1 Verdadero
- 2 Falso
- 3 No estoy seguro
- 8 Se rehúsa a contestar

Q113. El virus que causa el COVID19 se puede transmitir fácilmente de una persona a otra. (Elija Uno)

- 1 Verdadero
- 2 Falso
- 3 No estoy seguro
- 8 Se rehúsa a contestar

Q114. Muchos miles de personas han fallecido por COVID19. (Elija Uno)

- 1 Verdadero
- 2 Falso
- 3 No estoy seguro
- 8 Se rehúsa a contestar

Q115. Se encuentra disponible una vacuna para prevenir el COVID19. (Elija Uno)

- 1 Verdadero
- 2 Falso
- 3 No estoy seguro
- 8 Se rehúsa a contestar

Q116. La mayoría de las personas ya tienen inmunidad contra el COVID19. (Elija Uno)

- 1 Verdadero
- 2 Falso
- 3 No estoy seguro
- 8 Se rehúsa a contestar

Q117. Uno se puede dar cuenta si alguien tiene COVID19 con solo mirarlo. (Elija Uno)

- 1 Verdadero
- 2 Falso
- 3 No estoy seguro
- 8 Se rehúsa a contestar

Q118. Existen tratamientos efectivos para COVID19 que pueden curar a la mayoría de las personas.  
(Elija Uno)

- 1 Verdadero
- 2 Falso
- 3 No estoy seguro
- 8 Se rehúsa a contestar

Q119. El tener COVID19 es tan peligroso como el tener la gripa. (Elija Uno)

- 1 Verdadero
- 2 Falso
- 3 No estoy seguro
- 8 Se rehúsa a contestar

Q120. Las vacunas para el COVID que le ofrecen a personas como yo no son tan seguras como las otras vacunas para el COVID. (Elija Uno)

- 1 Verdadero
- 2 Falso
- 3 No estoy seguro
- 8 Se rehúsa a contestar

Q121. Las vacunas para el COVID tienen un dispositivo de rastreo. (Elija Uno)

- 1 Verdadero
- 2 Falso
- 3 No estoy seguro
- 8 Se rehúsa a contestar

Q122. Las vacunas para el COVID son seguras para las mujeres embarazadas. (Elija Uno)

- 1 Verdadero
- 2 Falso
- 3 No estoy seguro
- 8 Se rehúsa a contestar

Q123. Algunas vacunas para el COVID pueden cambiar mi ADN. (Elija Uno)

- 1 Verdadero
- 2 Falso
- 3 No estoy seguro
- 8 Se rehúsa a contestar

Q124. Si le ofrecieran una prueba rápida por hisopo nasal para el COVID hoy día y que le daría sus resultados en 20 minutos, ¿querría Ud. que se la hicieran? (Elija Uno)

- 0 No
- 1 Si
- 2 No estoy seguro
- 7 No Sabe
- 8 Se rehúsa a contestar

***If Q124 is equal to 1 and Q15 is equal to 1 then skip to Q125***

***If not, then skip to Q126.***

Q125. ¿Estaría Ud. dispuesto a hacerse la prueba si el gobierno de San Diego le exigiera que se reporte con su nombre el resultado de su prueba?

- 1 Si
- 0 No
- 7 No Sabe
- 8 Se rehúsa a contestar
- 9 No Corresponde

Q126. ¿Cree Ud. que ya le dió COVID-19? (Elija Uno)

- 1 Si
- 2 No
- 3 No estoy seguro
- 8 Se rehúsa a contestar

Q127. En una escala del 1 al 10, qué tan preocupada está de infectarse con COVID-19 (o de re-infectarse)? (Nota: 1 es no estar para nada preocupada, y 10 es estar demasiado preocupada.) **Entrevistador, por favor haga la pregunta aún cuando el participante le diga que ya tuvieron COVID o si ya se pusieron la vacuna.**

- 01 Low
- 02
- 03
- 04
- 05
- 06
- 07
- 08
- 09
- 10 High
- 98 Se rehúsa a contestar



Q132. Cuando se hizo la prueba para COVID-19 fuera de nuestro estudio, ¿qué tipo de prueba fué?  
**(Marque todas las que correspondan)** (Marque Todas las que Correspondan)

- Prueba de hisopado nasal
- Prueba de sangre (de anticuerpos)
- Saliva
- Otro tipo de prueba para COVID-19
- Se rehúsa a contestar

*If Q132D is equal to 1 then skip to Q133*

*If not, then skip to Q134.*

Q133. Por favor especifique qué otro tipo de prueba para COVID-19 se hizo.

-----

Q134. Dónde se hizo la prueba de COVID-19, fuera de nuestro estudio? **(Entrevistador, lea en voz alta las opciones y marque todas las que correspondan)** (Marque Todas las que Correspondan)

- Consultorio de un doctor
- Clínica/Centro de Salud de la Comunidad
- Programa de Intercambio de Jeringas
- Proyecto de Investigación (distinto de nuestro proyecto)
- Kit de prueba rapida en el hogar autoadministrada
- Otro
- Se rehúsa a contestar

*If Q134F is equal to 1 then skip to Q135*

*If not, then skip to Q136.*

Q135. Por favor especifique dónde se hizo la prueba para COVID-19 desde su última visita.

-----

Q136. ¿Cuándo fue la última vez que se hizo la prueba de COVID-19 fuera de nuestro estudio?

\_\_\_ / \_\_\_ / \_\_\_\_\_      dd / mm / aaaa  
2097      No Sabe (Año)  
2098      Se rehúsa a contestar (Año)

Q137. ¿Le dieron un resultado positivo para al COVID-19 fuera de nuestro estudio? (Escoja una)  
(Elija Uno)

- 1      Sí, obtuve resultado positivo
- 2      No, obtuve resultado negativo
- 3      Me realizaron la prueba, pero no obtuve el resultado
- 4      Desconoce/no entendió el resultado
- 8      Se rehúsa a contestar

*If Q137 is equal to 1 then skip to Q138*

*If not, then skip to instruction before Q139.*

Q138. ¿Cuándo fue la última vez que se hizo la prueba de COVID-19 fuera de nuestro estudio?

\_\_\_ / \_\_\_ / \_\_\_\_\_      dd / mm / aaaa  
2097      No Sabe (Año)  
2098      Se rehúsa a contestar (Año)

*If Q126 is equal to 1 or Q137 is equal to 1 then skip to Q139*

*If not, then skip to Q158.*



Q139. Cuando Ud. tuvo o Ud. creyó que tuvo COVID, ¿cuál de los siguientes síntomas tuvo Ud.?  
(Indique todos los que correspondan) (Marque Todas las que Correspondan)

- Fiebre de > 100.4F (38C)
- Fiebre subjetiva (se sintió afebrado, sin confirmar)
- Fiebre moderada o escalofríos
- Sudores nocturnos (que mojas las sábanas como 3 o más veces por semana)
- Estremecimientos reiterados con escalofríos
- Nariz escurridiza
- Tos
- Dolor de garganta
- Carraspera
- Falta de respiración
- Nausea o vómito
- Dolor de cabeza
- Dolor abdominal
- Diarrea (tres o más evacuaciones sueltas o más sueltas de lo normal en un período de 24 horas)
- Perdida repentina del olfato
- Perdida repentina del sabor
- Dolor de articulaciones
- Fatiga/cansancio extremo
- Se rehúsa a contestar

***If Q139A is equal to 1 then skip to Q140***

***If not, then skip to instruction before Q141.***

Q140. ¿Por cuánto tiempo ha tenido Fiebre >100.4F (38C)? (Elija Uno)

- 1 Menos de 8 días
- 2 8-13 días
- 3 14-20 días
- 4 Más de 20 días
- 7 No Sabe
- 8 Se rehúsa a contestar

*If Q139B is equal to 1 then skip to Q141*

*If not, then skip to instruction before Q142.*

Q141. ¿Por cuánto tiempo ha tenido Fiebre subjetiva? (Elija Uno)

- 1 Menos de 8 días
- 2 8-13 días
- 3 14-20 días
- 4 Más de 20 días
- 7 No Sabe
- 8 Se rehúsa a contestar

*If Q139C is equal to 1 then skip to Q142*

*If not, then skip to instruction before Q143.*

Q142. ¿Por cuánto tiempo ha tenido Fiebre moderada o escalofríos? (Elija Uno)

- 1 Menos de 8 días
- 2 8-13 días
- 3 14-20 días
- 4 Más de 20 días
- 7 No Sabe
- 8 Se rehúsa a contestar

*If Q139D is equal to 1 then skip to Q143*

*If not, then skip to instruction before Q144.*

Q143. ¿Por cuánto tiempo ha tenido Sudoración nocturna? (Elija Uno)

- 1 Menos de 8 días
- 2 8-13 días
- 3 14-20 días
- 4 Más de 20 días
- 7 No Sabe
- 8 Se rehúsa a contestar

*If Q139E is equal to 1 then skip to Q144*

*If not, then skip to instruction before Q145.*

Q144. ¿Por cuánto tiempo ha tenido Estremecimientos reiterados con escalofríos? (Elija Uno)

- 1 Menos de 8 días
- 2 8-13 días
- 3 14-20 días
- 4 Más de 20 días
- 7 No Sabe
- 8 Se rehúsa a contestar

*If Q139F is equal to 1 then skip to Q145*

*If not, then skip to instruction before Q146.*

Q145. ¿Por cuánto tiempo ha tenido Nariz escurridiza? (Elija Uno)

- 1 Menos de 8 días
- 2 8-13 días
- 3 14-20 días
- 4 Más de 20 días
- 7 No Sabe
- 8 Se rehúsa a contestar

*If Q139G is equal to 1 then skip to Q146*

*If not, then skip to instruction before Q147.*

Q146. ¿Por cuánto tiempo ha tenido Tos? (Elija Uno)

- 1 Menos de 8 días
- 2 8-13 días
- 3 14-20 días
- 4 Más de 20 días
- 7 No Sabe
- 8 Se rehúsa a contestar

*If Q139H is equal to 1 then skip to Q147*

*If not, then skip to instruction before Q148.*

Q147. ¿Por cuánto tiempo ha tenido Dolor de garganta? (Elija Uno)

- 1 Menos de 8 días
- 2 8-13 días
- 3 14-20 días
- 4 Más de 20 días
- 7 No Sabe
- 8 Se rehúsa a contestar

*If Q139I is equal to 1 then skip to Q148*

*If not, then skip to instruction before Q149.*

Q148. ¿Por cuánto tiempo ha tenido Carraspera? (Elija Uno)

- 1 Menos de 8 días
- 2 8-13 días
- 3 14-20 días
- 4 Más de 20 días
- 7 No Sabe
- 8 Se rehúsa a contestar

*If Q139J is equal to 1 then skip to Q149*

*If not, then skip to instruction before Q150.*

Q149. ¿Por cuánto tiempo ha tenido Falta de respiración? (Elija Uno)

- 1 Menos de 8 días
- 2 8-13 días
- 3 14-20 días
- 4 Más de 20 días
- 7 No Sabe
- 8 Se rehúsa a contestar

*If Q139K is equal to 1 then skip to Q150*

*If not, then skip to instruction before Q151.*

Q150. ¿Por cuánto tiempo ha tenido Nausea o vómito? (Elija Uno)

- 1 Menos de 8 días
- 2 8-13 días
- 3 14-20 días
- 4 Más de 20 días
- 7 No Sabe
- 8 Se rehúsa a contestar

*If Q139L is equal to 1 then skip to Q151*

*If not, then skip to instruction before Q152.*

Q151. ¿Por cuánto tiempo ha tenido Dolor de cabeza? (Elija Uno)

- 1 Menos de 8 días
- 2 8-13 días
- 3 14-20 días
- 4 Más de 20 días
- 7 No Sabe
- 8 Se rehúsa a contestar

*If Q139M is equal to 1 then skip to Q152*

*If not, then skip to instruction before Q153.*

|                                                                 |   |                       |
|-----------------------------------------------------------------|---|-----------------------|
| Q152. ¿Por cuánto tiempo ha tenido Dolor abdominal? (Elija Uno) | 1 | Menos de 8 días       |
|                                                                 | 2 | 8-13 días             |
|                                                                 | 3 | 14-20 días            |
|                                                                 | 4 | Más de 20 días        |
|                                                                 | 7 | No Sabe               |
|                                                                 | 8 | Se rehúsa a contestar |

*If Q139N is equal to 1 then skip to Q153*

*If not, then skip to instruction before Q154.*

|                                                         |   |                       |
|---------------------------------------------------------|---|-----------------------|
| Q153. ¿Por cuánto tiempo ha tenido Diarrea? (Elija Uno) | 1 | Menos de 8 días       |
|                                                         | 2 | 8-13 días             |
|                                                         | 3 | 14-20 días            |
|                                                         | 4 | Más de 20 días        |
|                                                         | 7 | No Sabe               |
|                                                         | 8 | Se rehúsa a contestar |

*If Q139O is equal to 1 then skip to Q154*

*If not, then skip to instruction before Q155.*

|                                                                              |   |                       |
|------------------------------------------------------------------------------|---|-----------------------|
| Q154. ¿Por cuánto tiempo ha tenido Perdida repentina del olfato? (Elija Uno) | 1 | Menos de 8 días       |
|                                                                              | 2 | 8-13 días             |
|                                                                              | 3 | 14-20 días            |
|                                                                              | 4 | Más de 20 días        |
|                                                                              | 7 | No Sabe               |
|                                                                              | 8 | Se rehúsa a contestar |

***If Q139P is equal to 1 then skip to Q155***

***If not, then skip to instruction before Q156.***

Q155. ¿Por cuánto tiempo ha tenido Perdida repentina del sabor? (Elija Uno)

- |   |                       |
|---|-----------------------|
| 1 | Menos de 8 días       |
| 2 | 8-13 días             |
| 3 | 14-20 días            |
| 4 | Más de 20 días        |
| 7 | No Sabe               |
| 8 | Se rehúsa a contestar |

***If Q139Q is equal to 1 then skip to Q156***

***If not, then skip to instruction before Q157.***

Q156. ¿Por cuánto tiempo ha tenido Dolor de articulaciones? (Elija Uno)

- |   |                       |
|---|-----------------------|
| 1 | Menos de 8 días       |
| 2 | 8-13 días             |
| 3 | 14-20 días            |
| 4 | Más de 20 días        |
| 7 | No Sabe               |
| 8 | Se rehúsa a contestar |

***If Q139R is equal to 1 then skip to Q157***

***If not, then skip to Q158.***



Q157. ¿Por cuánto tiempo ha tenido Fatiga/cansancio extremo? (Elija Uno)

- 1 Menos de 8 días
- 2 8-13 días
- 3 14-20 días
- 4 Más de 20 días
- 7 No Sabe
- 8 Se rehúsa a contestar

Q158. ¿Lo han hospitalizado por COVID-19? (Elija Uno)

- 0 No
- 1 Si, he sido hospitalizado
- 8 Se rehúsa a contestar

*If Q158 is equal to 1 then skip to Q159*

*If not, then skip to Q160.*

Q159. ¿Cuándo fue hospitalizado por COVID-19 la última vez?

\_\_\_ / \_\_\_ / \_\_\_\_\_      dd / mm / aaaa  
2097      No Sabe (Año)

Q160. ¿Cuántas personas conoce Ud. que han fallecido de COVID-19?

\_\_\_  
998      Se rehúsa a contestar

Q161. ¿Cuántas personas conoce que se han puesto la vacuna para el COVID-19?

\_\_\_\_\_  
9998      Se rehúsa a contestar

Q162. ¿Alguna vez en su vida ha recibido una vacuna para la gripa? 1 Si  
0 No  
7 No Sabe  
8 Se rehúsa a contestar

Q163. ¿Le han ofrecido una vacuna contra el COVID19? (Elija Uno) 1 Si  
2 No  
3 No estoy seguro  
8 Se rehúsa a contestar

Q164. ¿Ya le han puesto unaa vacuna contra el COVID19? (Elija Uno)  
1 Si  
2 No  
3 No estoy seguro-a  
8 Se rehúsa a contestar

*If Q164 is equal to 1 then skip to Q165*

*If not, then skip to instruction before Q172.*

Q165. ¿En qué país recibió la vacuna de COVID-19? (Elija Uno) 1 EUA  
2 México  
3 Otro país  
8 Se rehúsa a contestar

*If Q165 is equal to 3 then skip to Q166*

*If not, then skip to Q167.*

Q166. Por favor, especifique en qué otro país recibió la vacuna para el COVID-19.

-----

- Q167. ¿Cuál vacuna contra el COVID19 le pusieron? (Elija Uno)
- |    |                       |
|----|-----------------------|
| 01 | Moderna               |
| 02 | Pfizer                |
| 03 | Johnson y Johnson     |
| 04 | Astra Zeneca          |
| 05 | CanSino               |
| 06 | Sinovac               |
| 07 | Sputnik               |
| 08 | Otra                  |
| 97 | No Sabe               |
| 98 | Se rehúsa a contestar |

***If Q167 is equal to 8 then skip to Q168***

***If not, then skip to Q169.***

Q168. Por favor, especifique la vacuna para el COVID-19.

-----

- Q169. ¿Cuántas dosis de la vacuna le pusieron ya? (Elija Uno)
- |   |                       |
|---|-----------------------|
| 1 | Una                   |
| 2 | Dos                   |
| 3 | Me olvidé cuántas     |
| 8 | Se rehúsa a contestar |

Q170. ¿Cuándo recibió la primera inyección de la vacuna COVID-19?

\_\_\_ / \_\_\_ / \_\_\_\_\_ dd / mm / aaaa

2097 No Sabe (Año)

2098 Se rehúsa a contestar (Año)

***If Q169 is equal to 2 then skip to Q171***

*If not, then skip to instruction before Q172.*

Q171. ¿Cuándo recibió la segunda inyección de la vacuna COVID-19?

\_\_\_ / \_\_\_ / \_\_\_\_\_

dd / mm / aaaa

2097

No Sabe (Año)

2098

Se rehúsa a contestar (Año)

*If Q164 is not equal to 1 then skip to Q172*

*If not, then skip to Q186.*

Q172. ¿Ha tratado de ponerse la vacuna para el COVID pero no lo ha logrado?

1 Si

0 No

8 Se rehúsa a contestar

*If Q172 is equal to 1 then skip to Q173*

*If not, then skip to instruction before Q174.*

Q173. ¿Qué tipo de problemas ha tenido al tratar de ponerse la vacuna para el COVID?  
**(Entrevistador, lea la lista en voz alta e indiquen todas las que correspondan)**  
(Marque Todas las que Correspondan)

- No sé a dónde ir
- Demasiado lejos/Problemas de transporte
- No tenía una cita
- No tengo acceso a un teléfono o computadora para hacer la cita
- No me gusta el lugar o las personas en el lugar donde estann ofreciendo la vacuna
- La línea estab muy larga
- El personal me maltrató/me trató mal
- No reunía los requisitos (p. ej., edad, condiciones pre-existentes)
- No tengo seguridad/dinero
- No tenía identificación, ID
- Solamente ofrecían CanSino, Sinovac o Sputnik
- Otra
- Se rehúsa a contestar

*If Q173L is equal to 1 then skip to Q174*

*If not, then skip to Q175.*

Q174. Especifique qué otro tipo de problemas tuvo al tratar de conseguir ponerse la vacuna para el COVID?

-----

Q175. Si le ofrecieran una vacuna gratis para prevenir/evitar que se infecte con COVID 19 o que se vuelva a infectar, ¿estaría de acuerdo en recibirla/ponérsela? (Elija Uno)

- 1 Si
- 2 No
- 3 No estoy seguro
- 8 Se rehúsa a contestar

*If Q175 is equal to 2 or Q175 is equal to 3 then skip to Q176*

*If not, then skip to Q186.*

Q176. ¿Pro qué no querría recibir/ponerse una vacuna para evitar/prevenir que se infecte con COVID-19 (o que se vuelva a infectar)? (Marque Todas las que Correspondan)

- No me gustan las vacunas/jeringas
- Tengo alergias a las vacunas
- No me preocupa que me vaya a enfermar mucho con el COVID-19
- Pienso que las vacunas no funcionan muy bien
- No confío que las vacunas sean seguras
- No creo que la pandemia del COVID-19 sea tan mal como dice la gente
- No quiero tener que pagar por la vacuna
- No sé lo suficiente sobre cómo funciona la vacuna contra el COVID-19
- Me preocupa que me vaya a infectar con COVID-19 por la vacuna
- No me preocupa mi salud
- De todas maneras me voy a infectar con COVID-19/mi destino
- Me preocupa que la prueba de COVID me salga positiva por la vacuna
- Toma demasiado tiempo/Está muy lejos
- Me preocupan los efectos secundarios de la vacuna/que me haga sentir enfermo
- Ya me dió COVID y no creo que me vuelva a dar
- Tengo un sistema de defensas muy fuerte/ Creo que soy inmune
- Estoy tomando vitaminas y remedios naturales para protegerme de infectarme con COVID-19
- Me preocupa que me vaya a infectar porque tengo condiciones de salud pre-existentes
- Otra
- Se rehúsa a contestar

***If Q176S is equal to 1 then skip to Q177***

***If not, then skip to Q178.***

Q177. Por favor especifique por qué Ud. no querría recibir/ponerse la vacuna para evitar/prevenir infectarse con COVID-19.

-----  
-----  
-----

Q178. ¿A cuál de los siguientes lugares estaría Ud. dispuesto a asistir para obtener/recibir gratuitamente la vacuna para el COVID-19? **(Marque todas las que correspondan)**  
(Marque Todas las que Correspondan)

- Consultorio de un doctor
- Clínica/Centro de Salud de la Comunidad
- Farmacia
- Cárcel/Prisión/CERESO (si estuviera privado de la libertad)
- Unidad móvil del Programa de Intercambio de Jeringas
- Otra unidad móvil
- Albergue
- Programa de comidas
- Centro de servicios
- Iglesia/Templo
- Feria de Salud
- Otro
- Estaría dispuesto a ir a cualquier lugar
- Se rehúsa a contestar

***If Q178M is equal to 1 and Q178 is greater than 1 then READ: "No se puede elegir la opción "Estoy dispuesto a ir a cualquier lugar" junto con cualquiera de las otras opciones. Por favor verifique con el participante y actualice su respuesta." and skip to Q178.***

***If Q178L is equal to 1 then skip to Q179***

***If not, then skip to Q180.***



Q179. Por favor especifique a qué otro lugar/es estaría dispuesto a ir para recibir/ponerse la vacuna gratuita para el COVID-19?

-----  
-----  
-----

Q180. ¿Cuánto tiempo estaría Ud. dispuesto a dedicar de su tiempo para obtener/ponerse la vacuna gratuita para el COVID-19? (Elija Uno)

- 0 Nada de mi tiempo (ni un minuto)
- 1 Menos de 1 hora
- 2 De 1 a 3 horas
- 3 Cualquier cantidad de tiempo
- 8 Se rehúsa a contestar

Q181. ¿Cuál de lo siguiente estaría dispuesto a hacer para obtener/ponerse gratuitamente la vacuna para el COVID-19? (Marque Todas las que Correspondan)

- Si fuera una dosis en lugar de 2
- Si pudiera inhalar/tragar la vacuna
- Si la pudiera conseguir en un lugar cerca de donde vivo/me la llevo
- Si la pudiera conseguir en algún lugar donde ya voy
- Si mis amistades ya se la hubieran puesto
- Si alguien en quien confío me dijera que es segura
- Otra
- Nada me podría convencer de ponerme la
- Se rehúsa a contestar

***If Q181H is equal to 1 and Q181 is greater than 1 then READ: "No se puede usar la opción "Nada podría convencerme de ponerme la vacuna" junto con cualquiera de las otras opciones. por favor revise con el participante y actualice la respuesta." and skip to Q181.***

Q182. ¿Estaría Ud. más o menos dispuesto a ponerse la vacuna del COVID si Ud. recibiera \$10 dólares? (Elija Uno)

- 1 Más probablemente
- 2 Menos probablemente
- 3 No haría diferencia
- 8 Se rehúsa a contestar

Q183. ¿Estaría Ud. más o menos dispuesto a ponerse la vacuna del COVID si Ud. recibiera \$25 dólares? (Elija Uno)

- 1 Más probablemente
- 2 Menos probablemente
- 3 No haría diferencia
- 8 Se rehúsa a contestar

Q184. ¿Estaría Ud. más o menos dispuesto a ponerse la vacuna del COVID si Ud. recibiera \$50 dólares? (Elija Uno)

- 1 Más probablemente
- 2 Menos probablemente
- 3 No haría diferencia
- 8 Se rehúsa a contestar

Q185. ¿Estaría Ud. más o menos dispuesto a ponerse la vacuna del COVID si Ud. recibiera \$100 dólares? (Elija Uno)

- 1 Más probablemente
- 2 Menos probablemente
- 3 No haría diferencia
- 8 Se rehúsa a contestar

Q186. En caso que le salga positiva la prueba para el COVID-19, ¿se prodrá aislar?

- 1 Si
- 0 No
- 7 No Sabe
- 8 Se rehúsa a contestar

Q187. En caso que Ud estuviera expuesto a alguien con COVID-19, ¿se podría poner Ud. en cuarentena (es decir, separase Ud mismo de las demás personas por 10 días)?

- 1 Si
- 0 No
- 7 No Sabe
- 8 Se rehúsa a contestar

**READ: Hasta qué punto está de acuerdo con las dos siguientes oraciones:**

Q188. Yo sé dónde puedo conseguir prueba para el COVID-19 en mi comunidad. (Elija Uno)

- 0 Totalmente en desacuerdo
- 1 En desacuerdo
- 2 Ni en desacuerdo ni de acuerdo
- 3 De acuerdo
- 4 Totalmente de acuerdo
- 8 Se rehúsa a contestar

Q189. Es fácil conseguir hacerse la prueba para el COVID-19. (Elija Uno)

- 0 Totalmente en desacuerdo
- 1 En desacuerdo
- 2 Ni en desacuerdo ni de acuerdo
- 3 De acuerdo
- 4 Totalmente de acuerdo
- 8 Se rehúsa a contestar

Q190. Si me dan un resultado negativo a la prueba, quiere decir...**(Entrevistador lea las opciones al participante en voz alta e indique todas las que correspondan)** (Marque Todas las que Correspondan)

- No me tengo que preocupar de infectarme con COVID-19
- No tengo COVID-19 ahora
- Puedo estar con otros sin preocuparme de contagiarlos con COVID-19
- Puedo estar con otros sin preocuparme que me vayan a infectar con COVID-19
- Se rehúsa a contestar

**READ: LEA: Ahora tengo algunas preguntas sobre tu salud. Recuerda que toda la información que tu me proporcionas es privada y no se compartirá fuera del estudio. Empezaremos con una serie de signos y síntomas, te preguntaré si actualmente lo/los tienes, de ser así, por cuánto tiempo lo/s has tenido.**

Q191. Actualmente, ¿tienes Fiebre de > 100.4F (38C)?

- 1 Si
- 0 No
- 7 No Sabe
- 8 Se rehúsa a contestar

***If Q191 is equal to 1 then skip to Q192***

***If not, then skip to Q193.***

- Q192. ¿Cuánto tiempo la has tenido? (escoja uno) (Elija Uno)
- |   |                       |
|---|-----------------------|
| 1 | Menos de 8 días       |
| 2 | 8-13 días             |
| 3 | 14-20 días            |
| 4 | Más de 20 días        |
| 7 | No Sabe               |
| 8 | Se rehúsa a contestar |

Q193. Actualmente, ¿tienes fiebre subjetiva (se sintió afiebrado, sin confirmar)?

- |   |                       |
|---|-----------------------|
| 1 | Si                    |
| 0 | No                    |
| 7 | No Sabe               |
| 8 | Se rehúsa a contestar |

*If Q193 is equal to 1 then skip to Q194*

*If not, then skip to Q195.*

- Q194. ¿Cuánto tiempo la has tenido? (escoja uno) (Elija Uno)
- |   |                       |
|---|-----------------------|
| 1 | Menos de 8 días       |
| 2 | 8-13 días             |
| 3 | 14-20 días            |
| 4 | Más de 20 días        |
| 7 | No Sabe               |
| 8 | Se rehúsa a contestar |

Q195. Actualmente, ¿tienes fiebre moderada o escalofrios?

- |   |                       |
|---|-----------------------|
| 1 | Si                    |
| 0 | No                    |
| 7 | No Sabe               |
| 8 | Se rehúsa a contestar |

*If Q195 is equal to 1 then skip to Q196*

*If not, then skip to Q197.*

|                                                              |   |                       |
|--------------------------------------------------------------|---|-----------------------|
| Q196. ¿Cuánto tiempo lo has tenido? (escoja uno) (Elija Uno) | 1 | Menos de 8 días       |
|                                                              | 2 | 8-13 días             |
|                                                              | 3 | 14-20 días            |
|                                                              | 4 | Más de 20 días        |
|                                                              | 7 | No Sabe               |
|                                                              | 8 | Se rehúsa a contestar |

Q197. ¿Tienes: **sudores nocturnos (que mojas las sábanas como 3 o más veces por semana?)**

|   |                       |
|---|-----------------------|
| 1 | Si                    |
| 0 | No                    |
| 7 | No Sabe               |
| 8 | Se rehúsa a contestar |

*If Q197 is equal to 1 then skip to Q198*

*If not, then skip to Q199.*

|                                                              |   |                       |
|--------------------------------------------------------------|---|-----------------------|
| Q198. ¿Cuánto tiempo lo has tenido? (escoja uno) (Elija Uno) | 1 | Menos de 8 días       |
|                                                              | 2 | 8-13 días             |
|                                                              | 3 | 14-20 días            |
|                                                              | 4 | Más de 20 días        |
|                                                              | 7 | No Sabe               |
|                                                              | 8 | Se rehúsa a contestar |

|                                                              |   |                       |
|--------------------------------------------------------------|---|-----------------------|
| Q199. ¿Tienes: <b>Temblores repetitivos con escalofríos?</b> | 1 | Si                    |
|                                                              | 0 | No                    |
|                                                              | 7 | No Sabe               |
|                                                              | 8 | Se rehúsa a contestar |

*If Q199 is equal to 1 then skip to Q200*

*If not, then skip to Q201.*

|                                                              |   |                       |
|--------------------------------------------------------------|---|-----------------------|
| Q200. ¿Cuánto tiempo lo has tenido? (escoja uno) (Elija Uno) | 1 | Menos de 8 días       |
|                                                              | 2 | 8-13 días             |
|                                                              | 3 | 14-20 días            |
|                                                              | 4 | Más de 20 días        |
|                                                              | 7 | No Sabe               |
|                                                              | 8 | Se rehúsa a contestar |

|                                            |   |                       |
|--------------------------------------------|---|-----------------------|
| Q201. ¿Tienes: <b>escurrimiento nasal?</b> | 1 | Si                    |
|                                            | 0 | No                    |
|                                            | 7 | No Sabe               |
|                                            | 8 | Se rehúsa a contestar |

*If Q201 is equal to 1 then skip to Q202*

*If not, then skip to Q203.*

|                                                              |   |                       |
|--------------------------------------------------------------|---|-----------------------|
| Q202. ¿Cuánto tiempo lo has tenido? (escoja uno) (Elija Uno) | 1 | Menos de 8 días       |
|                                                              | 2 | 8-13 días             |
|                                                              | 3 | 14-20 días            |
|                                                              | 4 | Más de 20 días        |
|                                                              | 7 | No Sabe               |
|                                                              | 8 | Se rehúsa a contestar |

|                             |   |                       |
|-----------------------------|---|-----------------------|
| Q203. ¿Tienes: <b>tos</b> ? | 1 | Si                    |
|                             | 0 | No                    |
|                             | 7 | No Sabe               |
|                             | 8 | Se rehúsa a contestar |

*If Q203 is equal to 1 then skip to Q204*

*If not, then skip to Q205.*

|                                                              |   |                       |
|--------------------------------------------------------------|---|-----------------------|
| Q204. ¿Cuánto tiempo lo has tenido? (escoja uno) (Elija Uno) | 1 | Menos de 8 días       |
|                                                              | 2 | 8-13 días             |
|                                                              | 3 | 14-20 días            |
|                                                              | 4 | Más de 20 días        |
|                                                              | 7 | No Sabe               |
|                                                              | 8 | Se rehúsa a contestar |

|                                           |   |                       |
|-------------------------------------------|---|-----------------------|
| Q205. ¿Tienes: <b>dolor de garganta</b> ? | 1 | Si                    |
|                                           | 0 | No                    |
|                                           | 7 | No Sabe               |
|                                           | 8 | Se rehúsa a contestar |

*If Q205 is equal to 1 then skip to Q206*

*If not, then skip to Q207.*

|                                                              |   |                       |
|--------------------------------------------------------------|---|-----------------------|
| Q206. ¿Cuánto tiempo lo has tenido? (escoja uno) (Elija Uno) | 1 | Menos de 8 días       |
|                                                              | 2 | 8-13 días             |
|                                                              | 3 | 14-20 días            |
|                                                              | 4 | Más de 20 días        |
|                                                              | 7 | No Sabe               |
|                                                              | 8 | Se rehúsa a contestar |



|                                  |   |                       |
|----------------------------------|---|-----------------------|
| Q207. ¿Tienes: <b>voz ronca?</b> | 1 | Si                    |
|                                  | 0 | No                    |
|                                  | 7 | No Sabe               |
|                                  | 8 | Se rehúsa a contestar |

*If Q207 is equal to 1 then skip to Q208*

*If not, then skip to Q209.*

|                                                              |   |                       |
|--------------------------------------------------------------|---|-----------------------|
| Q208. ¿Cuánto tiempo lo has tenido? (escoja uno) (Elija Uno) | 1 | Menos de 8 días       |
|                                                              | 2 | 8-13 días             |
|                                                              | 3 | 14-20 días            |
|                                                              | 4 | Más de 20 días        |
|                                                              | 7 | No Sabe               |
|                                                              | 8 | Se rehúsa a contestar |

|                                                 |   |                       |
|-------------------------------------------------|---|-----------------------|
| Q209. ¿Tienes: <b>dificultad para respirar?</b> | 1 | Si                    |
|                                                 | 0 | No                    |
|                                                 | 7 | No Sabe               |
|                                                 | 8 | Se rehúsa a contestar |

*If Q209 is equal to 1 then skip to Q210*

*If not, then skip to Q211.*

|                                                              |   |                       |
|--------------------------------------------------------------|---|-----------------------|
| Q210. ¿Cuánto tiempo lo has tenido? (escoja uno) (Elija Uno) | 1 | Menos de 8 días       |
|                                                              | 2 | 8-13 días             |
|                                                              | 3 | 14-20 días            |
|                                                              | 4 | Más de 20 días        |
|                                                              | 7 | No Sabe               |
|                                                              | 8 | Se rehúsa a contestar |

|                                                           |   |                       |
|-----------------------------------------------------------|---|-----------------------|
| Q211. ¿Tienes: <b>los ganglios linfáticos agrandados?</b> | 1 | Si                    |
|                                                           | 0 | No                    |
|                                                           | 7 | No Sabe               |
|                                                           | 8 | Se rehúsa a contestar |

*If Q211 is equal to 1 then skip to Q212*

*If not, then skip to Q213.*

|                                                              |   |                       |
|--------------------------------------------------------------|---|-----------------------|
| Q212. ¿Cuánto tiempo lo has tenido? (escoja uno) (Elija Uno) | 1 | Menos de 8 días       |
|                                                              | 2 | 8-13 días             |
|                                                              | 3 | 14-20 días            |
|                                                              | 4 | Más de 20 días        |
|                                                              | 7 | No Sabe               |
|                                                              | 8 | Se rehúsa a contestar |

|                                          |   |                       |
|------------------------------------------|---|-----------------------|
| Q213. ¿Tienes: <b>Náuseas o vómitos?</b> | 1 | Si                    |
|                                          | 0 | No                    |
|                                          | 7 | No Sabe               |
|                                          | 8 | Se rehúsa a contestar |

*If Q213 is equal to 1 then skip to Q214*

*If not, then skip to Q215.*

|                                                              |   |                       |
|--------------------------------------------------------------|---|-----------------------|
| Q214. ¿Cuánto tiempo lo has tenido? (escoja uno) (Elija Uno) | 1 | Menos de 8 días       |
|                                                              | 2 | 8-13 días             |
|                                                              | 3 | 14-20 días            |
|                                                              | 4 | Más de 20 días        |
|                                                              | 7 | No Sabe               |
|                                                              | 8 | Se rehúsa a contestar |

|                                        |   |                       |
|----------------------------------------|---|-----------------------|
| Q215. ¿Tienes: <b>dolor de cabeza?</b> | 1 | Si                    |
|                                        | 0 | No                    |
|                                        | 7 | No Sabe               |
|                                        | 8 | Se rehúsa a contestar |

*If Q215 is equal to 1 then skip to Q216*

*If not, then skip to Q217.*

|                                                              |   |                       |
|--------------------------------------------------------------|---|-----------------------|
| Q216. ¿Cuánto tiempo lo has tenido? (escoja uno) (Elija Uno) | 1 | Menos de 8 días       |
|                                                              | 2 | 8-13 días             |
|                                                              | 3 | 14-20 días            |
|                                                              | 4 | Más de 20 días        |
|                                                              | 7 | No Sabe               |
|                                                              | 8 | Se rehúsa a contestar |

|                                        |   |                       |
|----------------------------------------|---|-----------------------|
| Q217. ¿Tienes: <b>dolor abdominal?</b> | 1 | Si                    |
|                                        | 0 | No                    |
|                                        | 7 | No Sabe               |
|                                        | 8 | Se rehúsa a contestar |

*If Q217 is equal to 1 then skip to Q218*

*If not, then skip to Q219.*

|                                                              |   |                       |
|--------------------------------------------------------------|---|-----------------------|
| Q218. ¿Cuánto tiempo lo has tenido? (escoja uno) (Elija Uno) | 1 | Menos de 8 días       |
|                                                              | 2 | 8-13 días             |
|                                                              | 3 | 14-20 días            |
|                                                              | 4 | Más de 20 días        |
|                                                              | 7 | No Sabe               |
|                                                              | 8 | Se rehúsa a contestar |

Q219. ¿Tienes: **Diarrea (3 o más evacuaciones sueltas/más flojas de lo normal en un período de 24 horas)?**

- 1 Si
- 0 No
- 7 No Sabe
- 8 Se rehúsa a contestar

*If Q219 is equal to 1 then skip to Q220*

*If not, then skip to Q221.*

Q220. ¿Cuánto tiempo lo has tenido? (escoja uno) (Elija Uno)

- 1 Menos de 8 días
- 2 8-13 días
- 3 14-20 días
- 4 Más de 20 días
- 7 No Sabe
- 8 Se rehúsa a contestar

Q221. ¿Tienes: **pérdida del olfato repentina?**

- 1 Si
- 0 No
- 7 No Sabe
- 8 Se rehúsa a contestar

*If Q221 is equal to 1 then skip to Q222*

*If not, then skip to Q223.*

|                                                              |   |                       |
|--------------------------------------------------------------|---|-----------------------|
| Q222. ¿Cuánto tiempo lo has tenido? (escoja uno) (Elija Uno) | 1 | Menos de 8 días       |
|                                                              | 2 | 8-13 días             |
|                                                              | 3 | 14-20 días            |
|                                                              | 4 | Más de 20 días        |
|                                                              | 7 | No Sabe               |
|                                                              | 8 | Se rehúsa a contestar |

|                                                    |   |                       |
|----------------------------------------------------|---|-----------------------|
| Q223. ¿Tienes: <b>pérdida del gusto repentino?</b> | 1 | Si                    |
|                                                    | 0 | No                    |
|                                                    | 7 | No Sabe               |
|                                                    | 8 | Se rehúsa a contestar |

*If Q223 is equal to 1 then skip to Q224*

*If not, then skip to Q225.*

|                                                              |   |                       |
|--------------------------------------------------------------|---|-----------------------|
| Q224. ¿Cuánto tiempo lo has tenido? (escoja uno) (Elija Uno) | 1 | Menos de 8 días       |
|                                                              | 2 | 8-13 días             |
|                                                              | 3 | 14-20 días            |
|                                                              | 4 | Más de 20 días        |
|                                                              | 7 | No Sabe               |
|                                                              | 8 | Se rehúsa a contestar |

|                                                |   |                       |
|------------------------------------------------|---|-----------------------|
| Q225. ¿Tienes: <b>dolor de articulaciones?</b> | 1 | Si                    |
|                                                | 0 | No                    |
|                                                | 7 | No Sabe               |
|                                                | 8 | Se rehúsa a contestar |

*If Q225 is equal to 1 then skip to Q226*

*If not, then skip to Q227.*

|                                                              |   |                       |
|--------------------------------------------------------------|---|-----------------------|
| Q226. ¿Cuánto tiempo lo has tenido? (escoja uno) (Elija Uno) | 1 | Menos de 8 días       |
|                                                              | 2 | 8-13 días             |
|                                                              | 3 | 14-20 días            |
|                                                              | 4 | Más de 20 días        |
|                                                              | 7 | No Sabe               |
|                                                              | 8 | Se rehúsa a contestar |

|                                                  |   |                       |
|--------------------------------------------------|---|-----------------------|
| Q227. ¿Tienes: <b>fatiga/cansancio extremo</b> ? | 1 | Si                    |
|                                                  | 0 | No                    |
|                                                  | 7 | No Sabe               |
|                                                  | 8 | Se rehúsa a contestar |

*If Q227 is equal to 1 then skip to Q228*

*If not, then skip to Q229.*

|                                                              |   |                       |
|--------------------------------------------------------------|---|-----------------------|
| Q228. ¿Cuánto tiempo lo has tenido? (escoja uno) (Elija Uno) | 1 | Menos de 8 días       |
|                                                              | 2 | 8-13 días             |
|                                                              | 3 | 14-20 días            |
|                                                              | 4 | Más de 20 días        |
|                                                              | 7 | No Sabe               |
|                                                              | 8 | Se rehúsa a contestar |

|                                                           |   |                       |
|-----------------------------------------------------------|---|-----------------------|
| Q229. ¿Tienes: <b>hemóptisis (tos y flema con sangre)</b> | 1 | Si                    |
|                                                           | 0 | No                    |
|                                                           | 7 | No Sabe               |
|                                                           | 8 | Se rehúsa a contestar |

*If Q229 is equal to 1 then skip to Q230*

*If not, then skip to Q231.*

|                                                              |   |                       |
|--------------------------------------------------------------|---|-----------------------|
| Q230. ¿Cuánto tiempo lo has tenido? (escoja uno) (Elija Uno) | 1 | Menos de 8 días       |
|                                                              | 2 | 8-13 días             |
|                                                              | 3 | 14-20 días            |
|                                                              | 4 | Más de 20 días        |
|                                                              | 7 | No Sabe               |
|                                                              | 8 | Se rehúsa a contestar |

|                                                    |   |                       |
|----------------------------------------------------|---|-----------------------|
| Q231. ¿Tienes: <b>dolor o presión en el pecho?</b> | 1 | Si                    |
|                                                    | 0 | No                    |
|                                                    | 7 | No Sabe               |
|                                                    | 8 | Se rehúsa a contestar |

*If Q231 is equal to 1 then skip to Q232*

*If not, then skip to Q233.*

|                                                              |   |                       |
|--------------------------------------------------------------|---|-----------------------|
| Q232. ¿Cuánto tiempo lo has tenido? (escoja uno) (Elija Uno) | 1 | Menos de 8 días       |
|                                                              | 2 | 8-13 días             |
|                                                              | 3 | 14-20 días            |
|                                                              | 4 | Más de 20 días        |
|                                                              | 7 | No Sabe               |
|                                                              | 8 | Se rehúsa a contestar |

|                                                   |   |                       |
|---------------------------------------------------|---|-----------------------|
| Q233. ¿Tienes: <b>pérdida de peso sin querer?</b> | 1 | Si                    |
|                                                   | 0 | No                    |
|                                                   | 7 | No Sabe               |
|                                                   | 8 | Se rehúsa a contestar |

*If Q233 is equal to 1 then skip to Q234*

*If not, then skip to instruction before Q235.*

- Q234. ¿Cuánto tiempo lo has tenido? (escoja uno) (Elija Uno)
- |   |                       |
|---|-----------------------|
| 1 | Menos de 8 días       |
| 2 | 8-13 días             |
| 3 | 14-20 días            |
| 4 | Más de 20 días        |
| 7 | No Sabe               |
| 8 | Se rehúsa a contestar |



## PREGUNTAS SOBRE EL ESTIGMA INTERSECCIONAL DE COVID

**READ: LEA AL PARTICIPANTE:** *Las siguientes preguntas hablarán sobre si tu has sido tratado de una manera diferente durante la pandemia de COVID-19, cuando el gobierno le pidió a las personas que se resguardaran, se quedaran en casa, y que limitaran el número de personas con las que pasaban el tiempo en público.*

*Por COVID-19, nos referimos al coronavirus que también se le llama corona, el Rona, y Señorita Rona.*

*Las primeras preguntas serán sobre qué tan preocupado estabas que te hubieran tratado diferente, y las últimas preguntas serán sobre las diferentes formas en que a usted realmente lo trataron de manera diferente.*

Q235. Cuando la pandemia de COVID-19 comenzó en Marzo 2020, ¿estabas preocupado de que puieras ser acosado/a verbalmente o físicamente por otras personas (incluyendo la policía) porque había menos personas en público?

- |   |                       |
|---|-----------------------|
| 1 | Si                    |
| 0 | No                    |
| 8 | Se rehúsa a contestar |

*If Q235 is equal to 1 then skip to instruction before Q236*

*If not, then skip to Q242.*

**READ: LEA AL PARTICIPANTE:** *En una escala del 1-5, con 1 siendo para nada y 5 siendo mucho, cuanto le preocupó que fuera amenazado o acosado por lo siguiente:*

Q236. Cuánto te preocupó que fueras amenazado o acosado por: **Tu género** (Escoja uno) (Elija Uno)

- 1 Para nada
- 2 Un poco
- 3 Algo
- 4 Bastante
- 5 Mucho
- 8 Se rehúsa a contestar

Q237. Cuánto te preocupó que fueras amenazado o acosado por: **El color de tu piel** (Escoja uno) (Elija Uno)

- 1 Para nada
- 2 Un poco
- 3 Algo
- 4 Bastante
- 5 Mucho
- 8 Se rehúsa a contestar

Q238. Cuánto te preocupó que fueras amenazado o acosado por: **tatuajes visibles u otras marcas físicas** (Escoja uno) (Elija Uno)

- 1 Para nada
- 2 Un poco
- 3 Algo
- 4 Bastante
- 5 Mucho
- 8 Se rehúsa a contestar

Q239. Cuánto te preocupó que fueras amenazado o acosado por: **la ropa que usas** (Escoja uno)  
(Elija Uno)

- 1 Para nada
- 2 Un poco
- 3 Algo
- 4 Bastante
- 5 Mucho
- 8 Se rehúsa a contestar

Q240. Cuánto te preocupó que fueras amenazado o acosado por: **Tener trakes u otros signos de uso activo de drogas** (Escoja uno) (Elija Uno)

- 1 Para nada
- 2 Un poco
- 3 Algo
- 4 Bastante
- 5 Mucho
- 8 Se rehúsa a contestar

Q241. Cuánto te preocupó que fueras amenazado o acosado por: **Tu orientación sexual** (Escoja uno) (Elija Uno)

- 1 Para nada
- 2 Un poco
- 3 Algo
- 4 Bastante
- 5 Mucho
- 8 Se rehúsa a contestar

Q242. Cuando la pandemia de COVID-19 empezó en Marzo 2020 ¿te preocupaba que podieras ser acosado verbalmente o físicamente por otros (incluyendo la policía) si usabas cubre bocas?

- |   |                       |
|---|-----------------------|
| 1 | Si                    |
| 0 | No                    |
| 8 | Se rehúsa a contestar |

*If Q242 is equal to 1 then skip to instruction before Q243*

*If not, then skip to Q249.*

**READ: LEA AL PARTICIPANTE: En una escala del 1-5, con 1 siendo para nada y 5 siendo mucho, cuánto te preocupó que te amenazaran o acosaran por usar cubre bocas por lo siguiente:**

Q243. Cuánto te preocupó que fueras amenazado o acosado por *usar cubre bocas* por: **su género** (escoja uno) (Elija Uno)

- |   |                       |
|---|-----------------------|
| 1 | Para nada             |
| 2 | Un poco               |
| 3 | Algo                  |
| 4 | Bastante              |
| 5 | Mucho                 |
| 8 | Se rehúsa a contestar |

Q244. Cuánto te preocupó que fueras amenazado o acosado por *usar cubre bocas* por: **el color de tu piel** (escoja uno) (Elija Uno)

- 1 Para nada
- 2 Un poco
- 3 Algo
- 4 Bastante
- 5 Mucho
- 8 Se rehúsa a contestar

Q245. Cuánto te preocupó que fueras amenazado o acosado por *usar cubre bocas* por: **tatuajes visibles u otras marcas físicas** (escoja uno) (Elija Uno)

- 1 Para nada
- 2 Un poco
- 3 Algo
- 4 Bastante
- 5 Mucho
- 8 Se rehúsa a contestar

Q246. Cuánto te preocupó que fueras amenazado o acosado por *usar cubre bocas* por: **la ropa que usas** (escoja uno) (Elija Uno)

- 1 Para nada
- 2 Un poco
- 3 Algo
- 4 Bastante
- 5 Mucho
- 8 Se rehúsa a contestar

Q247. Cuánto te preocupó que fueras amenazado o acosado por *usar cubre bocas* por: **tener trakes u otros signos de uso activo de drogas** (escoja uno) (Elija Uno)

- 1 Para nada
- 2 Un poco
- 3 Algo
- 4 Bastante
- 5 Mucho
- 8 Se rehúsa a contestar

Q248. Cuánto te preocupó que fueras amenazado o acosado por *usar cubre bocas* por: **su orientación sexual** (escoja uno) (Elija Uno)

- 1 Para nada
- 2 Un poco
- 3 Algo
- 4 Bastante
- 5 Mucho
- 8 Se rehúsa a contestar

Q249. Durante la pandemia COVID-19 ¿sufriste más acoso verbal que antes (que te llamaran nombres o insultos)?

- 1 Si
- 0 No
- 8 Se rehúsa a contestar

*If Q249 is equal to 1 then skip to instruction before Q250*

*If not, then skip to Q256.*

**READ: LEA AL PARTICIPANTE: En una escala de 1-5, con 1 siendo para nada y 5 siendo mucho, cuánto ..... este trato por lo siguiente:**

Q250. Sufriste más abuso verbal que antes por: **Tu género** (escoja uno) (Elija Uno)

- 1 Para nada
- 2 Un poco
- 3 Algo
- 4 Bastante
- 5 Mucho
- 8 Se rehúsa a contestar

Q251. Sufriste más abuso verbal que antes por: **el color de tu piel** (escoja uno) (Elija Uno)

- 1 Para nada
- 2 Un poco
- 3 Algo
- 4 Bastante
- 5 Mucho
- 8 Se rehúsa a contestar

Q252. Sufriste más abuso verbal que antes por: **tatuajes visibles u otras marcas físicas** (escoja uno) (Elija Uno)

- 1 Para nada
- 2 Un poco
- 3 Algo
- 4 Bastante
- 5 Mucho
- 8 Se rehúsa a contestar

Q253. Sufriste más abuso verbal que antes por: **La ropa que usas** (escoja uno) (Elija Uno)

- 1 Para nada
- 2 Un poco
- 3 Algo
- 4 Bastante
- 5 Mucho
- 8 Se rehúsa a contestar

Q254. Sufriste más abuso verbal que antes por: **tener trakes u otros signos de uso activo de drogas** (escoja uno) (Elija Uno)

- 1 Para nada
- 2 Un poco
- 3 Algo
- 4 Bastante
- 5 Mucho
- 8 Se rehúsa a contestar



Q255. Sufriste más abuso verbal que antes por: **tu orientación sexual** (escoja uno) (Elija Uno)

- 1 Para nada
- 2 Un poco
- 3 Algo
- 4 Bastante
- 5 Mucho
- 8 Se rehúsa a contestar

Q256. ¿Durante la pandemia de COVID-19 fuiste amenazado o dañado físicamente más que antes?

- 1 Si
- 0 No
- 8 Se rehúsa a contestar

*If Q256 is equal to 1 then skip to instruction before Q257*

*If not, then skip to instruction before Q263.*

**READ: LEER AL PARTICIPANTE: En una escala del 1-5, con 1 siendo para nada y 5 siendo mucho, ¿cuánto fuiste por lo siguiente?**

Q257. Amenazado o dañado físicamente más que antes por: **tu género** (escoja uno) (Elija Uno)

- 1 Para nada
- 2 Un poco
- 3 Algo
- 4 Bastante
- 5 Mucho
- 8 Se rehúsa a contestar

Q258. Amenazado o dañado físicamente más que antes por: **el color de tu piel** (escoja uno) (Elija Uno)

- 1 Para nada
- 2 Un poco
- 3 Algo
- 4 Bastante
- 5 Mucho
- 8 Se rehúsa a contestar

Q259. Amenazado o dañado físicamente más que antes por: **tatuajes visibles u otras marcas físicas** (escoja uno) (Elija Uno)

- 1 Para nada
- 2 Un poco
- 3 Algo
- 4 Bastante
- 5 Mucho
- 8 Se rehúsa a contestar

Q260. Amenazado o dañado físicamente más que antes por: **la ropa que usas** (escoja uno) (Elija Uno)

- 1 Para nada
- 2 Un poco
- 3 Algo
- 4 Bastante
- 5 Mucho
- 8 Se rehúsa a contestar

Q261. Amenazado o dañado físicamente más que antes por: **tener trakes u otros signos de uso activo de drogas** (escoja uno) (Elija Uno)

- |   |                       |
|---|-----------------------|
| 1 | Para nada             |
| 2 | Un poco               |
| 3 | Algo                  |
| 4 | Bastante              |
| 5 | Mucho                 |
| 8 | Se rehúsa a contestar |

Q262. Amenazado o dañado físicamente más que antes por: **orientación sexual** (escoja uno) (Elija Uno)

- |   |                       |
|---|-----------------------|
| 1 | Para nada             |
| 2 | Un poco               |
| 3 | Algo                  |
| 4 | Bastante              |
| 5 | Mucho                 |
| 8 | Se rehúsa a contestar |

**READ: LEER AL PARTICIPANTE: Las siguientes preguntas se tratan sobre su estado de ánimo.**

ITEMS DE LA ESCALA DE ANSIEDAD GAD-7 (COVBO1-COVBO7)

Q263. En las últimas 2 semanas, ¿con qué frecuencia le han molestado los siguientes problemas: sentirse nervioso, ansioso o al límite? (Escoja una) (Elija Uno)

- 1 Para nada
- 2 Varios días
- 3 Más de la mitad de los días
- 4 Casi todos los días
- 7 No Sabe
- 8 Se rehúsa a contestar

Q264. En las últimas 2 semanas, ¿con qué frecuencia le ha molestado el: no poder detener o controlar las preocupaciones? (Escoja una) (Elija Uno)

- 1 Para nada
- 2 Varios días
- 3 Más de la mitad de los días
- 4 Casi todos los días
- 7 No Sabe
- 8 Se rehúsa a contestar

Q265. En las últimas 2 semanas, ¿con qué frecuencia le ha molestado el: preocuparse demasiado por diferentes cosas? (Escoja una) (Elija Uno)

- 1 Para nada
- 2 Varios días
- 3 Más de la mitad de los días
- 4 Casi todos los días
- 7 No Sabe
- 8 Se rehúsa a contestar

Q266. En las últimas 2 semanas, ¿con qué frecuencia le ha molestado el: tener problemas para relajarse? (Escoja una) (Elija Uno)

- 1 Para nada
- 2 Varios días
- 3 Más de la mitad de los días
- 4 Casi todos los días
- 7 No Sabe
- 8 Se rehúsa a contestar

Q267. En las últimas 2 semanas, ¿con qué frecuencia le ha molestado: estar tan intranquilo que es difícil quedarse quieto? (Escoja una) (Elija Uno)

- 1 Para nada
- 2 Varios días
- 3 Más de la mitad de los días
- 4 Casi todos los días
- 7 No Sabe
- 8 Se rehúsa a contestar

Q268. En las últimas 2 semanas, ¿con qué frecuencia le ha molestado: Ser fácilmente irritado o encontrarse irritable? (Escoja una) (Elija Uno)

- 1 Para nada
- 2 Varios días
- 3 Más de la mitad de los días
- 4 Casi todos los días
- 7 No Sabe
- 8 Se rehúsa a contestar

Q269. En las últimas 2 semanas, ¿con qué frecuencia le ha molestado: sentir miedo como si algo horrible fuera a suceder? (Escoja una) (Elija Uno)

- |   |                             |
|---|-----------------------------|
| 1 | Para nada                   |
| 2 | Varios días                 |
| 3 | Más de la mitad de los días |
| 4 | Casi todos los días         |
| 7 | No Sabe                     |
| 8 | Se rehúsa a contestar       |

**READ: LEA: LEA: Por favor indique hasta qué punto está de acuerdo con cada una de las siguientes declaraciones.**

#### ITEMS DE LA ESCALA BREVE SOBRE RESILIENCIA (COVCOP1-COVCOP6)

Q270. Tiendo a recuperarme rápidamente después de tiempos difíciles. (Escoja una) (Elija Uno)

- |   |                       |
|---|-----------------------|
| 1 | Muy en desacuerdo     |
| 2 | En desacuerdo         |
| 3 | Neutral               |
| 4 | De acuerdo            |
| 5 | Muy de acuerdo        |
| 8 | Se rehúsa a contestar |

Q271. Tengo dificultad pasando por eventos estresantes. (Escoja una) (Elija Uno)

- 1 Muy en desacuerdo
- 2 En desacuerdo
- 3 Neutral
- 4 De acuerdo
- 5 Muy de acuerdo
- 8 Se rehúsa a contestar

Q272. No me toma mucho tiempo el recuperarme de un evento estresante. (Escoja una) (Elija Uno)

- 1 Muy en desacuerdo
- 2 En desacuerdo
- 3 Neutral
- 4 De acuerdo
- 5 Muy de acuerdo
- 8 Se rehúsa a contestar

Q273. Regresarme cuesta recuperarme de inmediato de un evento malo. (Escoja una) (Elija Uno)

- 1 Muy en desacuerdo
- 2 En desacuerdo
- 3 Neutral
- 4 De acuerdo
- 5 Muy de acuerdo
- 8 Se rehúsa a contestar

Q274. Normalmente me recupero de tiempos difíciles sin mucho problemas. (Escoja una) (Elija Uno)

- 1 Muy en desacuerdo
- 2 En desacuerdo
- 3 Neutral
- 4 De acuerdo
- 5 Muy de acuerdo
- 8 Se rehúsa a contestar

Q275. Tiendo a tomar mucho tiempo para superar los contratiempos en mi vida. (Escoja una) (Elija Uno)

- 1 Muy en desacuerdo
- 2 En desacuerdo
- 3 Neutral
- 4 De acuerdo
- 5 Muy de acuerdo
- 8 Se rehúsa a contestar

Q276. ¿Cuándo fue su visita más reciente a un médico, enfermera u otro proveedor de salud? Incluyendo telemedicina y visitas remotas. (Escoja una) (Elija Uno)

- 1 En las últimas dos semanas
- 2 Entre 2 semanas y 1 mes
- 3 Más de 1 mes pero dentro de los 6 meses
- 4 Hace 6-12 meses
- 5 Hace más de 12 meses.
- 8 Se rehúsa a contestar



Q277. En los últimos 7 días, ¿se le ha acabado algún medicamento recetado? (Escoja una) (Elija Uno)

- 1 Sí, n
- 2 Sí, n
- 3 Sí, t
- 4 No
- 8 Se r

## Tuberculosis, Percepciones, Pruebas, y Tratamiento

**READ: LEA: Las siguientes preguntas son acerca de su entendimiento y sentimientos acerca de la Tuberculosis (TB). Por favor responda "Si" o "No" a cada pregunta. Si usted no sabe la respuesta, está bien; solo dígame que no lo sabe.**

Q278. ¿Puede la gente tener TB latente (dormida) en su cuerpo y no tener la enfermedad activa?

|   |                       |
|---|-----------------------|
| 1 | Si                    |
| 0 | No                    |
| 7 | No Sabe               |
| 8 | Se rehúsa a contestar |

Q279. ¿El compartir los trastes, botellas, o cepillos de dientes con alguien que tenga TB aumenta la posibilidad de contagiarse con TB?

|   |                       |
|---|-----------------------|
| 1 | Si                    |
| 0 | No                    |
| 7 | No Sabe               |
| 8 | Se rehúsa a contestar |

Q280. ¿Se puede contagiar la TB de persona a persona por medio del aire?

|   |                       |
|---|-----------------------|
| 1 | Si                    |
| 0 | No                    |
| 7 | No Sabe               |
| 8 | Se rehúsa a contestar |

Q281. ¿La TB se puede curar tomando medicinas?

|   |                       |
|---|-----------------------|
| 1 | Si                    |
| 0 | No                    |
| 7 | No Sabe               |
| 8 | Se rehúsa a contestar |

Q282. ¿Tiene la cicatriz de la vacuna BCG? (la cicatriz BCG se hace en el bíceps, a diferencia de la prueba cutánea de TB que se hace en el antebrazo).

- 1 Si
- 0 No
- 7 No Sabe
- 8 Se rehúsa a contestar

Q283. ¿Alguna vez se hizo una prueba de la piel para la TB?

- 1 Si
- 0 No
- 7 No Sabe
- 8 Se rehúsa a contestar

*If Q283 is equal to 1 then skip to Q284*

*If not, then skip to Q285.*

Q284. ¿Cuál fue el resultado de la prueba? (Elija Uno)

- 0 Negativo
- 1 Positivo
- 2 No determinado
- 7 No Sabe
- 8 Se rehúsa a contestar

Q285. ¿Alguna vez le han hecho una radiografía del pecho porque el personal médico pensó que usted podría tener TB?

- 1 Si
- 0 No
- 7 No Sabe
- 8 Se rehúsa a contestar

*If Q285 is equal to 1 then skip to Q286*

*If not, then skip to Q287.*

Q286. ¿Cuándo fue la última vez que le hicieron una radiografía del pecho para la TB? (Elija Uno)  
(Elija Uno)

- 1 Durante el último mes
- 2 Hace 2-6 meses
- 3 Hace 7-12 meses
- 4 Hace Más de un Año
- 5 No Sabe
- 6 Se rehúsa a contestar

Q287. ¿Alguna vez le ha dicho un doctor o un trabajador de salud que usted tiene la TB activa?  
Esto no incluye tener una prueba de piel positiva pero sin síntomas.

- 1 Si
- 0 No
- 7 No Sabe
- 8 Se rehúsa a contestar

*If Q287 is equal to 1 then skip to Q288*

*If not, then skip to Q293.*

Q288. ¿En qué CIUDAD le dijeron que tenía TB activa?

-----

Q289. ¿En qué ESTADO le dijeron que tenía TB activa?

-----

- Q290. ¿En que PAIS le dijeron que tenía TB activa? (Elija Uno)
- |   |                       |
|---|-----------------------|
| 0 | México                |
| 1 | EUA                   |
| 2 | Otro                  |
| 7 | No Sabe               |
| 8 | Se rehúsa a contestar |

*If Q290 is not equal to 2, then skip to Q292.*

Q291. Especifique qué otro país:

-----

Q292. ¿Cuándo le dijeron que su prueba de TB activa salió positiva? (Indique el Mes y Año)

\_\_\_ / \_\_\_ mm / aaaa

2097 No Sabe (Año)

2098 Se rehúsa a contestar (Año)

Q293. ¿Alguna vez ha tomado medicamentos para la enfermedad de la TB o TB latente?

1 Si

0 No

7 No Sabe

8 Se rehúsa a contestar

*If Q293 is equal to 1 then skip to Q294*

*If not, then skip to Q298.*

Q294. ¿Por cuántos meses tomó medicamentos para la TB? \_\_\_

97 No Sabe

98 Se rehúsa a contestar

Q295. ¿Dejaste de tomar tu medicamento antes de lo que te recetó el doctor?

- 1 Si
- 0 No
- 7 No Sabe
- 8 Se rehúsa a contestar

*If Q295 is equal to 1 then skip to Q296*

*If not, then skip to instruction before Q297.*

Q296. Si usted dejó de tomar sus medicamentos antes de lo que le indicó su doctor, ¿cuál fue la razón por la que dejó de tomarlos? **(Entrevistador: Lea la lista, marque todas las respuestas que apliquen)** (Marque Todas las que Correspondan)

- \_\_\_ Los medicamentos me hacían daño
- \_\_\_ No creía que necesitara tomarlos
- \_\_\_ No podía pagar más medicamentos
- \_\_\_ Mi doctor me dijo que los dejara de tomar
- \_\_\_ Me deportaron a México
- \_\_\_ Otro
- \_\_\_ Se rehúsa a contestar

*If Q296F is equal to 1 then skip to Q297*

*If not, then skip to Q298.*

Q297. Especifique cuál otra razón por la que interrumpió el medicamento antes de tiempo:

-----

- Q298. ¿Ha conocido a alguien que tuviera TB?
- |   |                       |
|---|-----------------------|
| 1 | Si                    |
| 0 | No                    |
| 7 | No Sabe               |
| 8 | Se rehúsa a contestar |

*If Q298 is equal to 1 then skip to Q299*

*If not, then skip to instruction before Q301.*

- Q299. ¿Cuántas personas ha conocido que tenían TB?    — — — —
- |      |                       |
|------|-----------------------|
| 9997 | No Sabe               |
| 9998 | Se rehúsa a contestar |

Q300. ¿Cuál era su relación con esta persona o personas? **(Entrevistador: Lea la lista, marque todas las respuestas que apliquen)** (Marque Todas las que Correspondan)

- Miembro Adulto de la familia que vive con usted, incluyendo conyugue
- Miembro menor de la familia que vive con usted
- Persona que vive con usted que no es familiar
- Miembro de la familia que NO vive con usted
- Pareja sexual que no vive con usted
- Amistad cercana
- Alguien que trabaja con usted
- Conocido (alguien que conociste una o dos veces)
- Otro usuario de drogas
- Otro
- No Sabe
- Se rehúsa a contestar

*If Q300J is equal to 1 then skip to Q301*

*If not, then skip to Q302.*

Q301. Especifique la relación a esa persona:

-----

Q302. En los últimos **6 meses**, ha tomado leche bronca o queso sin pasteurizar? Estos son usualmente productos que no han sido procesados en una fábrica como **queso fresco**.

- |   |                       |
|---|-----------------------|
| 1 | Si                    |
| 0 | No                    |
| 7 | No Sabe               |
| 8 | Se rehúsa a contestar |

Q303. ¿Alguna vez ha vivido o trabajado en una lechería, rancho, o un rastro, u otro lugar donde se crían o faenan/carnean/sacrifican vacas?

- |   |                       |
|---|-----------------------|
| 1 | Si                    |
| 0 | No                    |
| 7 | No Sabe               |
| 8 | Se rehúsa a contestar |

*If Q191 is equal to 1 or Q193 is equal to 1 or Q195 is equal to 1 or Q197 is equal to 1 or Q199 is equal to 1 or Q201 is equal to 1 or Q203 is equal to 1 or Q205 is equal to 1 or Q207 is equal to 1 or Q209 is equal to 1 or Q213 is equal to 1 or Q215 is equal to 1 or Q217 is equal to 1 or Q219 is equal to 1 or Q221 is equal to 1 or Q223 is equal to 1 or Q227 is equal to 1 then READ: "Interviewer, at the end of the interview you will be prompted to give the participant a Covid-19 referral."*

*If Q204 is equal to 4 and (Q195 is equal to 1 or Q197 is equal to 1 or Q207 is equal to 1 or Q209 is equal to 1 or Q211 is equal to 1 or Q225 is equal to 1 or Q227 is equal to 1 or Q231 is equal to 1) or Q229 is equal to 1 then READ: "Al final de la entrevista, brinde al participante una referencia para la Clínica de tratamiento de TB."*



### Sección de Autoexamen de VIH

**READ: LEA AL PARTICIPANTE: Las siguientes preguntas son sobre autoexámenes de VIH. Un autoexamen de VIH se refiere a una prueba rápida de VIH que puedes administrarte a ti mismo en casa o en cualquier ubicación conveniente al recolectar tu propia saliva o sangre al pinchar su dedo con una pequeña aguja. Si sales positivo al VIH en un autoexamen de VIH, aun tendras que hacerte una prueba standard de VIH en una clínica u organización comunitaria que realice la prueba de VIH para confirmar tus resultados. Los autoexámenes de VIH están actualmente disponibles en otros países, incluyendo Estados Unidos. Para planear para el uso futuro de autoexámenes de VIH en México, nos gustaría saber qué piensas tu sobre los autoexámenes de VIH.**

Q304. ¿Alguna vez te has hecho un autoexamen de VIH? (escoja uno) (Elija Uno)

- |   |                             |
|---|-----------------------------|
| 0 | No                          |
| 1 | Si                          |
| 2 | No aplica (es VIH Positivo) |
| 8 | Se rehúsa a contestar       |

***If Q304 is equal to 2, then skip to instruction before Q314.***

Q305. ¿Estarías dispuesto a usar un autoexamen de VIH? (escoja uno) (Elija Uno)

- |   |                        |
|---|------------------------|
| 1 | Definitivamente no     |
| 2 | Probablemente no       |
| 3 | No estoy seguro, no se |
| 4 | Probablemente          |
| 5 | Definitivamente        |
| 8 | Se rehúsa a contestar  |

Q306. ¿Estarías dispuesto a darles un autoexamen de VIH a tus parejas sexuales para que ellos se hagan la prueba de VIH? (escoja uno) (Elija Uno)

- 1 Definitivamente no
- 2 Probablemente no
- 3 No estoy seguro, no se
- 4 Probablemente
- 5 Definitivamente
- 8 Se rehúsa a contestar

Q307. ¿Estarías dispuesto a darle autoexámenes de VIH a tus compañeros usuarios de drogas para que ellos se hagan la prueba de VIH? (escoja uno) (Elija Uno)

- 1 Definitivamente no
- 2 Probablemente no
- 3 No estoy seguro, no se
- 4 Probablemente
- 5 Definitivamente
- 8 Se rehúsa a contestar

*If Q305 is equal to 1 or Q305 is equal to 2 or Q305 is equal to 3 then skip to instruction before Q308*

*If not, then skip to instruction before Q311.*

**READ: LEA: LEA AL PARTICIPANTE: Ahora te voy a leer una lista de razones por las que algunas personas no quieren usar autoexámenes de VIH. Por favor indica qué tan de acuerdo o en desacuerdo estás con cada declaración.**

Q308. No me gustaría usar un autoexamen de VIH porque **me preocuparía que los autoexámenes de VIH son menos acertados que las pruebas standard de VIH** (escoja uno) (Elija Uno)

- 1 Totalmente en desacuerdo
- 2 En desacuerdo
- 3 Ni en acuerdo o desacuerdo
- 4 De acuerdo
- 5 Totalmente de acuerdo
- 8 Se rehúsa a contestar

Q309. No me gustaría usar un autoexamen de VIH porque **me preocuparía usar mal el autoexamen de VIH** (escoja uno) (Elija Uno)

- 1 Totalmente en desacuerdo
- 2 En desacuerdo
- 3 Ni en acuerdo o desacuerdo
- 4 De acuerdo
- 5 Totalmente de acuerdo
- 8 Se rehúsa a contestar

Q310. No me gustaría usar un autoexamen de VIH porque **me preocuparía malinterpretar los resultados** (escoja uno) (Elija Uno)

- 1 Totalmente en desacuerdo
- 2 En desacuerdo
- 3 Ni en acuerdo o desacuerdo
- 4 De acuerdo
- 5 Totalmente de acuerdo
- 8 Se rehúsa a contestar

*If Q305 is equal to 3 or Q305 is equal to 4 or Q305 is equal to 5 then skip to instruction before Q311*

*If not, then skip to instruction before Q314.*

**READ: LEER: LEER AL PARTICIPANTE:** *Ahora te voy a leer una lista de razones por las que algunas personas se motivan a querer usar autoexámenes de VIH. Por favor indica que tan de acuerdo o en desacuerdo estas con cada declaración.*

Q311. Me motivaría a usar autoexámenes de VIH **porque podría hacerme pruebas de VIH más seguido.** (Escoja uno) (Elija Uno)

- 1 Totalmente en desacuerdo
- 2 En desacuerdo
- 3 Ni en acuerdo o desacuerdo
- 4 De acuerdo
- 5 Totalmente de acuerdo
- 8 Se rehúsa a contestar

Q312. Me motivaría a usar autoexámenes de VIH **porque sería más conveniente que ir a una clínica u organización comunitaria para una prueba de VIH standard.** (Escoja uno) (Elija Uno)

- 1 Totalmente en desacuerdo
- 2 En desacuerdo
- 3 Ni en acuerdo o desacuerdo
- 4 De acuerdo
- 5 Totalmente de acuerdo
- 8 Se rehúsa a contestar

Q313. Me motivaría a usar autoexámenes de VIH **porque me daría más privacidad y me ayudaría a asegurar la confidencialidad de mis resultados de prueba de VIH.** (Escoja uno) (Elija Uno)

- 1 Totalmente en desacuerdo
- 2 En desacuerdo
- 3 Ni en acuerdo o desacuerdo
- 4 De acuerdo
- 5 Totalmente de acuerdo
- 8 Se rehúsa a contestar

## Sección de Estigma de Metadona, Buprenorfina y Suboxona

**READ: LEA: LEA AL PARTICIPANTE: Las siguientes preguntas serán sobre acceso a tratamiento de rehabilitación de drogas. Hablamos sobre esto en su visita inicial un poco. ¿Puede recordarme de sus experiencias con programas de rehabilitación de drogas?**

Q314. ¿Alguna vez en su vida se ha inscrito en un programa de metadona? **Entrevistador: Si el participante dice: "No sé", LEA: La Metadona es una terapia oral de sustitución, lo que significa que el medicamento se le administra por vía oral (tomada) para ayudar a lidiar con su adicción.)**

|   |                       |
|---|-----------------------|
| 1 | Si                    |
| 0 | No                    |
| 8 | Se rehúsa a contestar |

*If Q314 is equal to 1 then skip to Q315*

*If not, then skip to Q316.*

Q315. ¿Actualmente se encuentra inscrito en un programa de metadona?

|   |                       |
|---|-----------------------|
| 1 | Si                    |
| 0 | No                    |
| 8 | Se rehúsa a contestar |

Q316. ¿Alguna vez en su vida ha estado inscrito en un programa de Buprenorfina-Suboxona? **(Entrevistador: Si el participante dice: "No sé", LEA: La buprenorfina/suboxona es una terapia oral de sustitución similar a la metadona, lo que significa que el medicamento se le administra por vía oral (tomada) para ayudar a lidiar con su adicción.)**

|   |                       |
|---|-----------------------|
| 1 | Si                    |
| 0 | No                    |
| 8 | Se rehúsa a contestar |

*If Q316 is equal to 1 then skip to Q317*

*If not, then skip to instruction before Q318.*

Q317. ¿Actualmente se encuentra inscrito en un programa de Buprenorfina/Suboxona?

- 1 Si
- 0 No
- 8 Se rehúsa a contestar

Escala del Mecanismo de Estigma del Tratamiento de Mantenimiento con Metadona  
(MMT-SMS)

*If Q315 is equal to 1 and Q15 is equal to 1 then skip to instruction before Q318*

*If not, then skip to instruction before Q343.*

**READ: LEA: LEA AL PARTICIPANTE:** *Las siguientes preguntas son sobre recibir medicamento para la dependencia a opioides como la metadona, tratamiento de mantenimiento. Por favor piensa sobre cada pregunta e indica tu respuesta. El primer grupo de preguntas son sobre cómo te tratarían las personas en un futuro por recibir metadona. El segundo grupo de preguntas es sobre cómo te han tratado las personas en el pasado por haber recibido metadona. El tercer grupo es sobre cómo te sientes tu por estar recibiendo metadona.*

**READ: LEA LO SIGUIENTE AL PARTICIPANTE Y LUEGO PASE A LA SIGUIENTE PANTALLA Y LEA LAS AFIRMACIONES RELACIONADAS:** *¿Qué tan seguido la gente te ha tratado así en el pasado porque recibías metadona?*

ITEMS DE LA ESCALA DE ESTIGMA ESTABLECIDO (ES1-ES9)

Q318. Miembros de mi familia han pensado que sigo siendo un usuario de drogas. (Elija Uno)

- |   |                       |
|---|-----------------------|
| 1 | Nunca                 |
| 2 | No muy seguido        |
| 3 | Algo seguido          |
| 4 | Seguido               |
| 5 | Muy seguido           |
| 8 | Se rehúsa a contestar |



Q319. Miembros de mi familia no han apoyado mi tratamiento de metadona. (Escoja una) (Elija Uno)

- 1 Nunca
- 2 No muy seguido
- 3 Algo seguido
- 4 Seguido
- 5 Muy seguido
- 8 Se rehúsa a contestar

Q320. Miembros de mi familia han pensado que no puedo mejorar. (Escoja una) (Elija Uno)

- 1 Nunca
- 2 No muy seguido
- 3 Algo seguido
- 4 Seguido
- 5 Muy seguido
- 8 Se rehúsa a contestar

Q321. Los empleadores han pensado que sigo siendo un usuario de drogas. (Escoja una) (Elija Uno)

- 1 Nunca
- 2 No muy seguido
- 3 Algo seguido
- 4 Seguido
- 5 Muy seguido
- 8 Se rehúsa a contestar

Q322. Los empleadores han pensado que soy un mal trabajador. (Escoja una) (Elija Uno)

- 1 Nunca
- 2 No muy seguido
- 3 Algo seguido
- 4 Seguido
- 5 Muy seguido
- 8 Se rehúsa a contestar

Q323. Los empleadores han pensado que el manejar mi horario de dosis de metadona sería un problema. (Escoja una) (Elija Uno)

- 1 Nunca
- 2 No muy seguido
- 3 Algo seguido
- 4 Seguido
- 5 Muy seguido
- 8 Se rehúsa a contestar

Q324. Los trabajadores de salud han pensado que sigo siendo un usuario de drogas. (Escoja una) (Elija Uno)

- 1 Nunca
- 2 No muy seguido
- 3 Algo seguido
- 4 Seguido
- 5 Muy seguido
- 8 Se rehúsa a contestar

Q325. Los trabajadores de salud me han dado un mal trato. (Escoja una) (Elija Uno)

- 1 Nunca
- 2 No muy seguido
- 3 Algo seguido
- 4 Seguido
- 5 Muy seguido
- 8 Se rehúsa a contestar

Q326. Los trabajadores de salud no me han recetado medicamento que yo necesitaba. (Escoja una) (Elija Uno)

- 1 Nunca
- 2 No muy seguido
- 3 Algo seguido
- 4 Seguido
- 5 Muy seguido
- 8 Se rehúsa a contestar

***READ: LEER LO SIGUIENTE AL PARTICIPANTE Y LUEGO PASAR A LA SIGUIENTE PANTALLA Y LEER LAS AFIRMACIONES RELACIONADAS: ¿Qué tan probable es que las personas te trataran de alguna de las siguientes maneras en el futuro porque recibes metadona?***

ITEMS DE LA ESCALA DE ESTIGMA ANTICIPADO (AS1-AS9)

Q327. Miembros de mi familia pensarán que sigo siendo un usuario de drogas. (Escoja una) (Elija Uno)

- 1 Nunca
- 2 No muy seguido
- 3 Algo seguido
- 4 Seguido
- 5 Muy seguido
- 8 Se rehúsa a contestar

Q328. Miembros de mi familia no me apoyarán con mi tratamiento de metadona. (Escoja una) (Elija Uno)

- 1 Nunca
- 2 No muy seguido
- 3 Algo seguido
- 4 Seguido
- 5 Muy seguido
- 8 Se rehúsa a contestar

Q329. Miembros de mi familia pensarán que no puedo mejorar. (Escoja una) (Elija Uno)

- 1 Nunca
- 2 No muy seguido
- 3 Algo seguido
- 4 Seguido
- 5 Muy seguido
- 8 Se rehúsa a contestar

Q330. Los empleadores pensarán que sigo siendo un usuario de drogas. (Escoja una) (Elija Uno)

- 1 Nunca
- 2 No muy seguido
- 3 Algo seguido
- 4 Seguido
- 5 Muy seguido
- 8 Se rehúsa a contestar

Q331. Los empleadores pensarán que soy un mal trabajador. (Escoja una) (Elija Uno)

- 1 Nunca
- 2 No muy seguido
- 3 Algo seguido
- 4 Seguido
- 5 Muy seguido
- 8 Se rehúsa a contestar

Q332. Los empleadores pensarán que el manejar mi horario de dosis de metadona será un problema. (Escoja una) (Elija Uno)

- 1 Nunca
- 2 No muy seguido
- 3 Algo seguido
- 4 Seguido
- 5 Muy seguido
- 8 Se rehúsa a contestar

Q333. Los trabajadores de salud pensarán que sigo siendo un usuario de drogas. (Escoja una) (Elija Uno)

- 1 Nunca
- 2 No muy seguido
- 3 Algo seguido
- 4 Seguido
- 5 Muy seguido
- 8 Se rehúsa a contestar

Q334. Los trabajadores de salud me darán un mal trato. (Escoja una) (Elija Uno)

- 1 Nunca
- 2 No muy seguido
- 3 Algo seguido
- 4 Seguido
- 5 Muy seguido
- 8 Se rehúsa a contestar

Q335. Los trabajadores de salud no me van a recetar medicamento que yo necesito. (Escoja una) (Elija Uno)

- 1 Nunca
- 2 No muy seguido
- 3 Algo seguido
- 4 Seguido
- 5 Muy seguido
- 8 Se rehúsa a contestar

ITEMS DE ESTIGMA INTERNALIZADO (IS1-IS7)

Q336. El recibir metadona me hace sentir que soy una mala persona. (Escoja una) (Elija Uno)

- 1 Nunca
- 2 No muy seguido
- 3 Algo seguido
- 4 Seguido
- 5 Muy seguido
- 8 Se rehúsa a contestar

Q337. Siento que no soy tan bueno/a como otras personas porque recibo metadona. (Escoja una) (Elija Uno)

- 1 Nunca
- 2 No muy seguido
- 3 Algo seguido
- 4 Seguido
- 5 Muy seguido
- 8 Se rehúsa a contestar

Q338. Me siento avergonzado/a de mi tratamiento de metadona. (Escoja una) (Elija Uno)

- 1 Nunca
- 2 No muy seguido
- 3 Algo seguido
- 4 Seguido
- 5 Muy seguido
- 8 Se rehúsa a contestar

Q339. No me respeto a mí mismo/a porque recibo metadona. (Escoja una) (Elija Uno)

- 1 Nunca
- 2 No muy seguido
- 3 Algo seguido
- 4 Seguido
- 5 Muy seguido
- 8 Se rehúsa a contestar

Q340. El recibir metadona me hace sentir sucio/a. (Escoja una) (Elija Uno)

- 1 Nunca
- 2 No muy seguido
- 3 Algo seguido
- 4 Seguido
- 5 Muy seguido
- 8 Se rehúsa a contestar

Q341. Estar en tratamiento de metadona es algo desagradable/asqueroso para mí. (Escoja una) (Elija Uno)

- 1 Nunca
- 2 No muy seguido
- 3 Algo seguido
- 4 Seguido
- 5 Muy seguido
- 8 Se rehúsa a contestar



Q342. Estar en tratamiento de metadona me hace sentir que sigo siendo un usuario de drogas.  
(Escoja una) (Elija Uno)

- |   |                       |
|---|-----------------------|
| 1 | Nunca                 |
| 2 | No muy seguido        |
| 3 | Algo seguido          |
| 4 | Seguido               |
| 5 | Muy seguido           |
| 8 | Se rehúsa a contestar |

ESCALA DE ESTIGMA HACIA TRATAMIENTO DE MANTENIMIENTO CON METADONA (18 items)-MMS1-MMS18. Nota: MMS17 está codificado al revés.

*If Q314 is not equal to 1 then skip to instruction before Q343*

*If not, then skip to instruction before Q361.*

***READ: Entrevistador, lea al participante: La metadona es un medicamento que se puede tomar para tratar la dependencia a opioides. La metadona es un medicamento que trata la adicción a la heroína y otros opioides; reduce los síntomas de abstinencia y antojo de drogas, pero no te hará sentirte drogado. Estas preguntas serán sobre cómo te podrían tratar en un futuro si empezaras a tomar metadona. Por favor selecciona una respuesta para cada pregunta. No tardes mucho tiempo considerando tu respuesta. Tu primera impresión es usualmente la mejor.***

Q343. ¿Qué tan preocupado/a estás que se te negara alojamiento si tomas metadona? **(escoja uno)**  
(Elija Uno)

- |   |                       |
|---|-----------------------|
| 1 | Para nada             |
| 2 | Un poco               |
| 3 | Algo                  |
| 4 | Bastante              |
| 5 | Extremadamente        |
| 8 | Se rehúsa a contestar |

Q344. ¿Qué tan preocupado/a estás que se te negara trabajo si tomas metadona? **(escoja uno)**  
(Elija Uno)

- 1 Para nada
- 2 Un poco
- 3 Algo
- 4 Bastante
- 5 Extremadamente
- 8 Se rehúsa a contestar

Q345. ¿Qué tan preocupado/a estás que se te niegue asistencia de gobierno o beneficios similares si tomas metadona? **(escoja uno)** (Elija Uno)

- 1 Para nada
- 2 Un poco
- 3 Algo
- 4 Bastante
- 5 Extremadamente
- 8 Se rehúsa a contestar

***READ: LEA: LEA LO SIGUIENTE AL PARTICIPANTE Y LUEGO PASE A LA SIGUIENTE PANTALLA Y LEA LAS AFIRMACIONES RELACIONADAS: ¿Qué tan probable crees que es que las personas te vayan a tratar así en el futuro si estuvieras tomando metadona?***

Q346. Mis familiares pensarán que sigo siendo un usuario de drogas. **(escoja uno)** (Elija Uno)

- 1 Nunca
- 2 No seguido
- 3 Algunas veces
- 4 Seguido
- 5 Muy seguido
- 8 Se rehúsa a contestar

Q347. Mis familiares no apoyarán mi tratamiento de metadona. **(escoja uno)** (Elija Uno)

- 1 Nunca
- 2 No seguido
- 3 Algunas veces
- 4 Seguido
- 5 Muy seguido
- 8 Se rehúsa a contestar

Q348. Mis familiares pensarán que no puedo mejorar. **(escoja uno)** (Elija Uno)

- 1 Nunca
- 2 No seguido
- 3 Algunas veces
- 4 Seguido
- 5 Muy seguido
- 8 Se rehúsa a contestar

Q349. Los trabajadores de salud pensarán que sigo siendo un usuario de drogas. **(escoja uno)**  
(Elija Uno)

- 1 Nunca
- 2 No seguido
- 3 Algunas veces
- 4 Seguido
- 5 Muy seguido
- 8 Se rehúsa a contestar

Q350. Los trabajadores de salud me darán un mal trato. **(escoja uno)** (Elija Uno)

- 1 Nunca
- 2 No seguido
- 3 Algunas veces
- 4 Seguido
- 5 Muy seguido
- 8 Se rehúsa a contestar

Q351. Los trabajadores de salud no me recetarán el medicamento que necesito. **(escoja uno)** (Elija Uno)

- 1 Nunca
- 2 No seguido
- 3 Algunas veces
- 4 Seguido
- 5 Muy seguido
- 8 Se rehúsa a contestar

Q352. Otras personas que se inyectan drogas pensarán que soy débil si tomo metadona. **(escoja uno)** (Elija Uno)

- 1 Nunca
- 2 No seguido
- 3 Algunas veces
- 4 Seguido
- 5 Muy seguido
- 8 Se rehúsa a contestar

Q353. Otras personas que se inyectan drogas no me apoyarán si tomo metadona. **(escoja uno)**  
(Elija Uno)

- 1 Nunca
- 2 No seguido
- 3 Algunas veces
- 4 Seguido
- 5 Muy seguido
- 8 Se rehúsa a contestar

Q354. Otras personas que se inyectan drogas no me tendrán confianza si tomo metadona. **(escoja uno)** (Elija Uno)

- 1 Nunca
- 2 No seguido
- 3 Algunas veces
- 4 Seguido
- 5 Muy seguido
- 8 Se rehúsa a contestar

***READ: LEA: LEA: LEA LO SIGUIENTE AL PARTICIPANTE Y LUEGO PASE A LA SIGUIENTE PANTALLA Y LEA LAS AFIRMACIONES RELACIONADAS: ¿Cómo te sientes sobre las personas que toman metadona?***

Q355. Las personas que toman metadona están reemplazando una droga por otra. **(Escoja una)**  
(Elija Uno)

- 1 Totalmente en desacuerdo
- 2 En desacuerdo
- 3 Ni de acuerdo ni en desacuerdo
- 4 De acuerdo
- 5 Totalmente de acuerdo
- 8 Se rehúsa a contestar

Q356. Las personas que toman metadona no son de fiar/confiables. **(Escoja una)** (Elija Uno)

- 1 Totalmente en desacuerdo
- 2 En desacuerdo
- 3 Ni de acuerdo ni en desacuerdo
- 4 De acuerdo
- 5 Totalmente de acuerdo
- 8 Se rehúsa a contestar

Q357. Las personas que toman metadona no están en control de su propia vida. **(Escoja una)**  
(Elija Uno)

- 1 Totalmente en desacuerdo
- 2 En desacuerdo
- 3 Ni de acuerdo ni en desacuerdo
- 4 De acuerdo
- 5 Totalmente de acuerdo
- 8 Se rehúsa a contestar

Q358. Las personas que toman metadona me hacen sentir incómodo/a. **(Escoja una)** (Elija Uno)

- 1 Totalmente en desacuerdo
- 2 En desacuerdo
- 3 Ni de acuerdo ni en desacuerdo
- 4 De acuerdo
- 5 Totalmente de acuerdo
- 8 Se rehúsa a contestar

Q359. Las personas que toman metadona me hacen sentir con esperanza. **(Escoja una)** (Elija Uno)

- 1 Totalmente en desacuerdo
- 2 En desacuerdo
- 3 Ni de acuerdo ni en desacuerdo
- 4 De acuerdo
- 5 Totalmente de acuerdo
- 8 Se rehúsa a contestar

Q360. Las personas que toman metadona me hacen sentir enojado/a. **(Escoja una)** (Elija Uno)

- 1 Totalmente en desacuerdo
- 2 En desacuerdo
- 3 Ni de acuerdo ni en desacuerdo
- 4 De acuerdo
- 5 Totalmente de acuerdo
- 8 Se rehúsa a contestar

## **Escala de Mecanismo de Estigma por Tratamiento de Mantenimiento con Buprenorfina/Suboxona (BSMT-SMS)**

*If Q317 is equal to 1 and Q15 is equal to 1 then skip to instruction before Q361*

*If not, then skip to instruction before Q386.*

**READ: LEA: Entrevistador LEA AL PARTICIPANTE:** *Las siguientes preguntas son sobre el recibir medicamentos para la dependencia a opioides como Buprenorfina o suboxona, tratamiento de mantenimiento. Por favor piensa sobre cada pregunta e indica tu respuesta. El primer grupo de preguntas son sobre cómo te tratarían las personas en el futuro por tu tratamiento de buprenorfina o suboxona. El segundo grupo de preguntas es sobre cómo te han tratado en el pasado por tu tratamiento de buprenorfina o suboxona. El tercer grupo de preguntas es sobre cómo te sientes tu sobre tu tratamiento de buprenorfina o suboxona.*

**READ: LEA LO SIGUIENTE AL PARTICIPANTE Y LUEGO PASE A LA SIGUIENTE PANTALLA Y LEA LAS AFIRMACIONES RELACIONADAS:** *¿Qué tan seguido te han tratado las personas así en el pasado porque recibías buprenorfina/suboxona?*

### ITEMS DE ESTIGMA ESTABLECIDO (BSES1-BSES9)

Q361. Miembros de mi familia han pensado que aún sigo siendo un usuario de drogas. **(Escoja una)**  
(Elija Uno)

- |   |                       |
|---|-----------------------|
| 1 | Nunca                 |
| 2 | No seguido            |
| 3 | Algunas veces         |
| 4 | Seguido               |
| 5 | Muy seguido           |
| 8 | Se rehúsa a contestar |



Q362. Miembros de mi familia no han apoyado mi tratamiento de buprenorfina/suboxona. **(Escoja una)** (Elija Uno)

- 1 Nunca
- 2 No seguido
- 3 Algunas veces
- 4 Seguido
- 5 Muy seguido
- 8 Se rehúsa a contestar

Q363. Miembros de mi familia han pensado que no puedo mejorar. **(Escoja una)** (Elija Uno)

- 1 Nunca
- 2 No seguido
- 3 Algunas veces
- 4 Seguido
- 5 Muy seguido
- 8 Se rehúsa a contestar

Q364. Los empleadores han pensado que sigo siendo un usuario de drogas. **(Escoja una)** (Elija Uno)

- 1 Nunca
- 2 No seguido
- 3 Algunas veces
- 4 Seguido
- 5 Muy seguido
- 8 Se rehúsa a contestar

Q365. Los empleadores han pensado que soy un mal trabajador. **(Escoja una)** (Elija Uno)

- 1 Nunca
- 2 No seguido
- 3 Algunas veces
- 4 Seguido
- 5 Muy seguido
- 8 Se rehúsa a contestar

Q366. Los empleadores han pensado que el manejar mi horario de dosis de buprenorfina/suboxona era un problema. **(Escoja una)** (Elija Uno)

- 1 Nunca
- 2 No seguido
- 3 Algunas veces
- 4 Seguido
- 5 Muy seguido
- 8 Se rehúsa a contestar

Q367. Los trabajadores de salud han pensado que sigo siendo un usuario de drogas. **(Escoja una)** (Elija Uno)

- 1 Nunca
- 2 No seguido
- 3 Algunas veces
- 4 Seguido
- 5 Muy seguido
- 8 Se rehúsa a contestar

Q368. Los trabajadores de salud me han tratado mal. **(Escoja una)** (Elija Uno)

- 1 Nunca
- 2 No seguido
- 3 Algunas veces
- 4 Seguido
- 5 Muy seguido
- 8 Se rehúsa a contestar

Q369. Los trabajadores de salud no me han recetado medicamento que yo necesitaba. **(Escoja una)**  
(Elija Uno)

- 1 Nunca
- 2 No seguido
- 3 Algunas veces
- 4 Seguido
- 5 Muy seguido
- 8 Se rehúsa a contestar

**READ: LEA LO SIGUIENTE AL PARTICIPANTE Y LUEGO PASE A LA PANTALLA SIGUIENTE Y LEA LAS AFIRMACIONES RELACIONADAS: ¿Qué tan probable es que las personas te vayan a tratar así en el futuro porque estás usando buprenorfina/suboxona?**

ITEMS DE ESTIGMA ANTICIPADO (BSAS1-BSAS9)

Q370. Miembros de mi familia van a pensar que sigo siendo un usuario de drogas. **(Escoja una)**  
(Elija Uno)

- 1 Nunca
- 2 No seguido
- 3 Algunas veces
- 4 Seguido
- 5 Muy seguido
- 8 Se rehúsa a contestar

Q371. Miembros de mi familia no me apoyarán con mi tratamiento de buprenorfina/suboxona. **(Escoja una)**  
(Elija Uno)

- 1 Nunca
- 2 No seguido
- 3 Algunas veces
- 4 Seguido
- 5 Muy seguido
- 8 Se rehúsa a contestar

Q372. Miembros de mi familia pensarán que no puedo mejorar. **(Escoja una)**  
(Elija Uno)

- 1 Nunca
- 2 No seguido
- 3 Algunas veces
- 4 Seguido
- 5 Muy seguido
- 8 Se rehúsa a contestar

Q373. Los empleadores pensarán que sigo siendo un usuario de drogas. **(Escoja una)** (Elija Uno)

- 1 Nunca
- 2 No seguido
- 3 Algunas veces
- 4 Seguido
- 5 Muy seguido
- 8 Se rehúsa a contestar

Q374. Los empleadores pensarán que soy un mal trabajador. **(Escoja una)** (Elija Uno)

- 1 Nunca
- 2 No seguido
- 3 Algunas veces
- 4 Seguido
- 5 Muy seguido
- 8 Se rehúsa a contestar

Q375. Los empleadores pensarán que el manejar mi horario de dosis de buprenorfina/suboxona será un problema. **(Escoja una)** (Elija Uno)

- 1 Nunca
- 2 No seguido
- 3 Algunas veces
- 4 Seguido
- 5 Muy seguido
- 8 Se rehúsa a contestar

Q376. Los trabajadores de salud pensarán que sigo siendo un usuario de drogas. **(Escoja una)**  
(Elija Uno)

- 1 Nunca
- 2 No seguido
- 3 Algunas veces
- 4 Seguido
- 5 Muy seguido
- 8 Se rehúsa a contestar

Q377. Los trabajadores de salud me darán un mal trato. **(Escoja una)** (Elija Uno)

- 1 Nunca
- 2 No seguido
- 3 Algunas veces
- 4 Seguido
- 5 Muy seguido
- 8 Se rehúsa a contestar

Q378. Los trabajadores de salud no me van a recetar el medicamento que yo necesito. **(Escoja una)**  
(Elija Uno)

- 1 Nunca
- 2 No seguido
- 3 Algunas veces
- 4 Seguido
- 5 Muy seguido
- 8 Se rehúsa a contestar

ITEMS DE ESTIGMA INTERNALIZADO (BSIS1-BSIS7)

Q379. El recibir buprenorfina/suboxona me hace sentir que soy una mala persona. **(Escoja una)**  
(Elija Uno)

- 1 Nunca
- 2 No seguido
- 3 Algunas veces
- 4 Seguido
- 5 Muy seguido
- 8 Se rehúsa a contestar

Q380. Siento que no soy tan bueno/a como otras personas porque recibo metadona/buprenorfina/suboxona. **(Escoja una)** (Elija Uno)

- 1 Nunca
- 2 No seguido
- 3 Algunas veces
- 4 Seguido
- 5 Muy seguido
- 8 Se rehúsa a contestar

Q381. Me siento avergonzado/a de mi tratamiento de buprenorfina/suboxona. **(Escoja una)** (Elija Uno)

- 1 Nunca
- 2 No seguido
- 3 Algunas veces
- 4 Seguido
- 5 Muy seguido
- 8 Se rehúsa a contestar

Q382. Me respeto menos a mí mismo/a porque recibo buprenorfina/suboxona. **(Escoja una)** (Elija Uno)

- 1 Nunca
- 2 No seguido
- 3 Algunas veces
- 4 Seguido
- 5 Muy seguido
- 8 Se rehúsa a contestar

Q383. El recibir buprenorfina/suboxona me hace sentir sucio/a. **(Escoja una)** (Elija Uno)

- 1 Nunca
- 2 No seguido
- 3 Algunas veces
- 4 Seguido
- 5 Muy seguido
- 8 Se rehúsa a contestar

Q384. El usar tratamiento de buprenorfina/suboxona es algo desagradable/asqueroso para mí. **(Escoja una)** (Elija Uno)

- 1 Nunca
- 2 No seguido
- 3 Algunas veces
- 4 Seguido
- 5 Muy seguido
- 8 Se rehúsa a contestar



Q385. El usar tratamiento de buprenorfina/suboxona me hace sentir que sigo siendo un usuario de drogas. **(Escoja una)** (Elija Uno)

- 1 Nunca
- 2 No seguido
- 3 Algunas veces
- 4 Seguido
- 5 Muy seguido
- 8 Se rehúsa a contestar

*If Q316 is not equal to 1 and Q15 is equal to 1 then skip to instruction before Q386*

*If not, then skip to Q404.*

**READ: LEA: LEA AL PARTICIPANTE: LA Buprenorfina y suboxona son medicamentos que tratan la adicción a la heroína y otros opioides. Reducen los síntomas de abstinencia y el antojo de droga pero no te harán sentir dopado. Estas preguntas serán sobre cómo podrías llegar a ser tratado/a en el futuro si tomas buprenorfina o suboxona. Por favor selecciona una respuesta para cada pregunta. No te demores mucho pensando tu respuesta. Tu primera impresión usualmente es la mejor.**

ESTIGMA POR TRATAMIENTO DE MANTENIMIENTO CON BUPRENORFINA/ SUBOXONA (18 items)-BMTS1-BMTS18. Nota: BMTS17 está codificada al revés.

Q386. ¿Qué tan preocupado estás que se te niegue alojamiento si tomas buprenorfina/suboxona? **(Escoja una)** (Elija Uno)

- 1 Nunca
- 2 No seguido
- 3 Algunas veces
- 4 Seguido
- 5 Muy seguido
- 8 Se rehúsa a contestar

Q387. ¿Qué tan preocupado estás que se te niegue trabajo si tomas buprenorfina/suboxona?  
**(Escoja una)** (Elija Uno)

- 1 Nunca
- 2 No seguido
- 3 Algunas veces
- 4 Seguido
- 5 Muy seguido
- 8 Se rehúsa a contestar

Q388. ¿Qué tan preocupado estás que se te niegue asistencia de gobierno o beneficios similares si tomas buprenorfina/suboxona? **(Escoja una)** (Elija Uno)

- 1 Nunca
- 2 No seguido
- 3 Algunas veces
- 4 Seguido
- 5 Muy seguido
- 8 Se rehúsa a contestar

**READ: LEA LO SIGUIENTE AL PARTICIPANTE Y LUEGO PASE A LA PANTALLA SIGUIENTE Y LEA LAS AFIRMACIONES RELACIONADAS: ¿Qué tan probable es que las personas te traten así en el futuro si fueras a tomar buprenorfina/Suboxona?**

Q389. Miembros de mi familia pensarán que sigo siendo usuario de drogas. **(Escoja una)** (Elija Uno)

- 1 Nunca
- 2 No seguido
- 3 Algunas veces
- 4 Seguido
- 5 Muy seguido
- 8 Se rehúsa a contestar

Q390. Miembros de mi familia no me apoyarán con mi tratamiento de buprenorfina/Suboxona. **(Escoja una)** (Elija Uno)

- 1 Nunca
- 2 No seguido
- 3 Algunas veces
- 4 Seguido
- 5 Muy seguido
- 8 Se rehúsa a contestar

Q391. Miembros de mi familia pensarán que no me puedo recuperar. **(Escoja una)** (Elija Uno)

- 1 Nunca
- 2 No seguido
- 3 Algunas veces
- 4 Seguido
- 5 Muy seguido
- 8 Se rehúsa a contestar

Q392. Los trabajadores de salud pensarán que sigo siendo un usuario de drogas. **(Escoja una)**  
(Elija Uno)

- 1 Nunca
- 2 No seguido
- 3 Algunas veces
- 4 Seguido
- 5 Muy seguido
- 8 Se rehúsa a contestar

Q393. Los trabajadores de salud me darán un mal trato. **(Escoja una)** (Elija Uno)

- 1 Nunca
- 2 No seguido
- 3 Algunas veces
- 4 Seguido
- 5 Muy seguido
- 8 Se rehúsa a contestar

Q394. Los trabajadores de salud no me recetarán el medicamento que necesito. **(Escoja una)** (Elija Uno)

- 1 Nunca
- 2 No seguido
- 3 Algunas veces
- 4 Seguido
- 5 Muy seguido
- 8 Se rehúsa a contestar

Q395. Otras personas que se inyectan drogas pensarán que soy débil si tomo buprenofina/Suboxona.  
**(Escoja una)** (Elija Uno)

- 1 Nunca
- 2 No seguido
- 3 Algunas veces
- 4 Seguido
- 5 Muy seguido
- 8 Se rehúsa a contestar

Q396. Otras personas que se inyectan drogas no me apoyarán si tomo buprenofina/Suboxona.  
**(Escoja una)** (Elija Uno)

- 1 Nunca
- 2 No seguido
- 3 Algunas veces
- 4 Seguido
- 5 Muy seguido
- 8 Se rehúsa a contestar

Q397. Otras personas que se inyectan drogas no me tendrán confianza si tomo buprenofina/Suboxona. **(Escoja una)** (Elija Uno)

- 1 Nunca
- 2 No seguido
- 3 Algunas veces
- 4 Seguido
- 5 Muy seguido
- 8 Se rehúsa a contestar

**READ: LEA LO SIGUIENTE AL PARTICIPANTE Y LUEGO PASE A LA PANTALLA SIGUIENTE Y LEA LAS AFIRMACIONES RELACIONADAS: ¿Cómo te sientes sobre las personas que toman buprenorfina/saboxona?**

Q398. Las personas que toman buprenorfina/suboxona están reemplazando una droga con otra. **(Escoja una)** (Elija Uno)

- 1 Totalmente en desacuerdo
- 2 En desacuerdo
- 3 Ni de acuerdo ni en desacuerdo
- 4 De acuerdo
- 5 Totalmente de acuerdo
- 8 Se rehúsa a contestar

Q399. Las personas que toman buprenorfina/suboxona no son de fiar/confiables. **(Escoja una)** (Elija Uno)

- 1 Totalmente en desacuerdo
- 2 En desacuerdo
- 3 Ni de acuerdo ni en desacuerdo
- 4 De acuerdo
- 5 Totalmente de acuerdo
- 8 Se rehúsa a contestar

Q400. Las personas que toman buprenorfina/suboxona no tienen control sobre sus propias vidas. **(Escoja una)** (Elija Uno)

- 1 Totalmente en desacuerdo
- 2 En desacuerdo
- 3 Ni de acuerdo ni en desacuerdo
- 4 De acuerdo
- 5 Totalmente de acuerdo
- 8 Se rehúsa a contestar

Q401. Las personas que toman buprenorfina/suboxona me hacen sentir incómodo/a. **(Escoja una)** (Elija Uno)

- 1 Totalmente en desacuerdo
- 2 En desacuerdo
- 3 Ni de acuerdo ni en desacuerdo
- 4 De acuerdo
- 5 Totalmente de acuerdo
- 8 Se rehúsa a contestar

Q402. Las personas que toman buprenorfina/suboxoná me dan esperanza. **(Escoja una)** (Elija Uno)

- 1 Totalmente en desacuerdo
- 2 En desacuerdo
- 3 Ni de acuerdo ni en desacuerdo
- 4 De acuerdo
- 5 Totalmente de acuerdo
- 8 Se rehúsa a contestar

Q403. Las personas que toman buprenorfina/suboxoná me hacen sentir enojado/a. **(Escoja una)**  
(Elija Uno)

- 1 Totalmente en desacuerdo
- 2 En desacuerdo
- 3 Ni de acuerdo ni en desacuerdo
- 4 De acuerdo
- 5 Totalmente de acuerdo
- 8 Se rehúsa a contestar

Q404. En la siguiente sección, se le preguntaran los nombres de las personas en su círculo social, también habrá preguntas acerca de su relación con su círculo y su uso de drogas y practicas variadas de personas que no están en el estudio (no han dado su consentimiento escrito). Esta información es muy importante para mejorar las estrategias de prevención de salud, específicamente la reducción de la transmisión de VIH en su comunidad. Sin embargo, existe la posibilidad de que al compartir información respecto a su red social sin consentimiento de aquellas personas que usted menciona en esta entrevista, sepan de su participación a través de especulación. Me gustaría asegurarle que en ningún momento vamos a contactar a nadie que usted mencione en su entrevista y que la información que nos dé es privada y confidencial. Siempre vamos a hacer el mayor esfuerzo para evitar la diseminación y el acceso no autorizado a la información que usted nos provea. Si se siente incómodo o incomoda de proveer nombres, puede darnos apodos o iniciales de las personas en su círculo social, o bien también tiene derecho a negarse a contestar cualquiera de las preguntas. **¿Tengo su consentimiento para proceder con estas preguntas?**

- 1 Si
- 0 No
- 8 Se rehúsa a contestar

*If Q404 is equal to 1 then skip to instruction before Q405*

*If not, then skip to Q1150.*



**READ: LEA: DIGA LO SIGUIENTE:** Para esta entrevista vamos a platicar sobre personas con las que te juntas frecuentemente y que consideras amigos/as. Voy a preguntarte sobre personas que tú conoces bien. Nosotros intentamos aprender sobre cómo las personas que están conectadas entre sí y cómo esas conexiones se relacionan con el prevenir la infección de VIH y otras enfermedades. El contar con nombres e información demográfica nos ayudará a ver cómo las personas en este estudio están conectadas unas con otras, es decir, a través de amigos en común. Por favor recuerda que todo lo que me digas será confidencial y que nosotros protegeremos tu privacidad y la privacidad de las personas que menciones. Nosotros nunca en ningún momento usaremos esta información para contactar a las personas de las que tú nos hables.

Específicamente, voy a preguntarte sobre cuántas personas conoces que hayas visto en los últimos 30 días, con quien hablas sobre cosas que son importantes para ti. Estas personas pueden ser tu pareja (novia/novio, esposa/esposo), familia, amigos/as, personas con las que usas drogas, o cualquier otra persona con quien tú te consideras cercano/a. Por ejemplo, una persona que te recuerde tomar tu medicamento, alguien a quien le puedes pedir dinero prestado, alguien con quien juntas drogas o dinero, alguien con quien usas drogas, o alguien con quien puedes hablar sobre el uso de drogas o problemas personales. Recuerda, solo estamos interesados en esas personas que has visto en los últimos 30 días.

Q405. Por favor dime ¿cuántos amigos o personas con las que tú te asocias y con quién hablas sobre cosas que son importantes para ti has visto en los últimos 30 días?

— — —  
998

Se rehúsa a contestar

*If Q405 is equal to 0 or Q405 is equal to 998, then skip to instruction before Q686.*

**READ: LEA: ¿Cuáles son los nombres de estas personas? Por favor comienza con los más cercanos a ti.**

**Entrevistador:** Por favor escriba los nombres de las personas en una hoja de papel, primero, y luego el programa QDS le dará la instrucción de ingresar cada nombre.

**SI EL PARTICIPANTE PARECE NO QUERER DAR EL NOMBRE COMPLETO DIGA:** Si no quieres darnos su nombre completo puedes usar sus iniciales o solo su primer nombre o un apodo, para que tú puedas saber de quién hablas cuando te haga las preguntas de seguimiento sobre esta persona.

**SI EL PARTICIPANTE ENUMERA MENOS DE 5 O SI ESTA TENIENDO PROBLEMAS NOMBRANDO A ALGUIEN, PREGUNTA, [¿A quién más deberías agregar?]**

Por favor, piensa en la última vez o la anterior en las que tu hablaste con un amigo o pareja sobre cosas que son importantes para ti. ¿No has mencionado a alguno de ellos?

**TRANSLATION**

*If Q405 is greater than 0 then skip to Q406*

*If not, then skip to instruction before Q408.*

Q406. ¿Cuál es el nombre de la persona más cercana a Ud. con la que ha hablado sobre cosas importantes para Ud. y a quien ha visto en los últimos 30 días? **SI EL PARTICIPANTE MUESTRA RETICENCIA PARA DAR EL NOMBRE COMPLETO DE LA PERSONA, dígale lo siguiente: Si Ud. no quiere darnos su nombre completo, Ud puede darnos sus iniciales, o solo el primer nombre o su apodo para que así Ud pueda reconocer de quién estamos hablando cuando le hagamos mas preguntas sobre ésta persona. Si el participante le dá solo el apodo o las iniciales, anoteles aquí y en la siguiente pantalla.**

-----

*If Q406 is equal to "Se rehúsa a contestar", then skip to instruction before Q446.*

Q407. ¿Me puedes decir el apodo de [Response to Q406], si es que tienen un apodo? Entrevistador, por favor anotar el apodo.

-----

*If Q405 is greater than 1 then skip to Q408*

*If not, then skip to instruction before Q410.*

Q408. Entonces, el nombre de la priemra persona con la que hablas sobre cosas que son importantes para ti y a quien has visto en los últimos 30 días es [Response to Q406]. ¿Cuál es el nombre de la 2da persona con la que hablas y has visto en los últimos 30 días? **Entrevistador: Si el participante tiene dificultad para nombrar a otra persona, por favor dígale lo siguiente: "Por favor piense en las últimas veces que tuvo que hablar con un familiar, amigo/a o pareja sobre cosas que eran importantes para Ud. ¿Puede recordar sus nombres?" SI EL PARTICIPANTE MUESTRA RETICENCIA PARA DAR EL NOMBRE COMPLETO DE LA PERSONA, dígale que le puede dar las iniciales del nombre de la persona o su apodo.**

-----

*If Q408 is equal to "Se rehúsa a contestar", then skip to instruction before Q446.*

Q409. ¿Me puedes decir el apodo de [Response to Q408], si es que tiene un apodo? Entrevistador, por favor anotar el apodo.

-----

*If Q405 is greater than 2 then skip to Q410*

*If not, then skip to instruction before Q412.*

Q410. Hasta ahora has nombrado a [Response to Q406] y a [Response to Q408]. ¿Cuál es el nombre de la 3ra persona? **Entrevistador: Si el participante tiene dificultad para nombrar a otra persona, por favor dígame lo siguiente: "Por favor piense en las últimas veces que tuvo que hablar con un familiar, amigo/a o pareja sobre cosas que eran importantes para Ud. ¿Puede recordar sus nombres?" SI EL PARTICIPANTE MUESTRA RETICENCIA PARA DAR EL NOMBRE COMPLETO DE LA PERSONA, dígame que le puede dar las iniciales del nombre de la persona o su apodo.**

-----

*If Q410 is equal to "Se rehúsa a contestar", then skip to instruction before Q446.*

Q411. ¿Me puedes decir el apodo de [Response to Q410], si es que tiene un apodo? Entrevistador, por favor anotar el apodo.

-----

*If Q405 is greater than 3 then skip to Q412*

*If not, then skip to instruction before Q414.*

Q412. Hasta ahora has nombrado a [Response to Q406], [Response to Q408] y a [Response to Q410]. ¿Cuál es el nombre de la 4ta persona? **Entrevistador: Si el participante tiene dificultad para nombrar a otra persona, por favor dígame lo siguiente: "Por favor piense en las últimas veces que tuvo que hablar con un familiar, amigo/a o pareja sobre cosas que eran importantes para Ud. ¿Puede recordar sus nombres?" SI EL PARTICIPANTE MUESTRA RETICENCIA PARA DAR EL NOMBRE COMPLETO DE LA PERSONA, dígame que le puede dar las iniciales del nombre de la persona o su apodo.**

-----

*If Q412 is equal to "Se rehúsa a contestar", then skip to instruction before Q446.*

Q413. ¿Me puedes decir el apodo de [Response to Q412], si es que tiene un apodo? Entrevistador, por favor anotar el apodo.

-----

*If Q405 is greater than 4 then skip to Q414*

*If not, then skip to instruction before Q416.*

Q414. Hasta ahora has nombrado a [Response to Q406], [Response to Q408], [Response to Q410] y a [Response to Q412]. ¿Cuál es el nombre de la 5ta persona? **Entrevistador: Si el participante tiene dificultad para nombrar a otra persona, por favor dígame lo siguiente: "Por favor piense en las últimas veces que tuvo que hablar con un familiar, amigo/a o pareja sobre cosas que eran importantes para Ud. ¿Puede recordar sus nombres?" SI EL PARTICIPANTE MUESTRA RETICENCIA PARA DAR EL NOMBRE COMPLETO DE LA PERSONA, dígame que le puede dar las iniciales del nombre de la persona o su apodo.**

-----

*If Q414 is equal to "Se rehúsa a contestar", then skip to instruction before Q446.*

Q415. ¿Me puedes decir el apodo de [Response to Q414], si es que tiene un apodo? Entrevistador, por favor anotar el apodo.

-----

*If Q405 is greater than 5 then skip to Q416*

*If not, then skip to instruction before Q418.*

Q416. Hasta ahora has nombrado a [Response to Q406], [Response to Q408], [Response to Q410], [Response to Q412] y a [Response to Q414]. ¿Cuál es el nombre de la 6ta persona?

-----

*If Q416 is equal to "Se rehúsa a contestar", then skip to instruction before Q446.*

Q417. ¿Me puedes decir el apodo de [Response to Q416], si es que tiene un apodo? Entrevistador, por favor anotar el apodo.

-----

*If Q405 is greater than 6 then skip to Q418*

*If not, then skip to instruction before Q420.*

Q418. Hasta ahora has nombrado a [Response to Q406], [Response to Q408], [Response to Q410], [Response to Q412], [Response to Q414] y a [Response to Q416]. ¿Cuál es el nombre de la 7ma persona?

-----

*If Q418 is equal to "Se rehúsa a contestar", then skip to instruction before Q446.*

Q419. ¿Me puedes decir el apodo de [Response to Q418], si es que tiene un apodo? Entrevistador, por favor anotar el apodo.

-----

***If Q405 is greater than 7 then skip to Q420***

***If not, then skip to instruction before Q422.***

Q420. Hasta ahora has nombrado a [Response to Q406], [Response to Q408], [Response to Q410], [Response to Q412], [Response to Q414], [Response to Q416] y a [Response to Q418]. ¿Cuál es el nombre de la 8va persona?

-----

***If Q420 is equal to "Se rehúsa a contestar", then skip to instruction before Q446.***

Q421. ¿Me puedes decir el apodo de [Response to Q420], si es que tiene un apodo? Entrevistador, por favor anotar el apodo.

-----

***If Q405 is greater than 8 then skip to Q422***

***If not, then skip to instruction before Q424.***

Q422. Hasta ahora has nombrado a [Response to Q406], [Response to Q408], [Response to Q410], [Response to Q412], [Response to Q414], [Response to Q416], [Response to Q418] y a [Response to Q420]. ¿Cuál es el nombre de la 9na persona?

-----

***If Q422 is equal to "Se rehúsa a contestar", then skip to instruction before Q446.***

Q423. ¿Me puedes decir el apodo de [Response to Q422], si tienen uno? Entrevistador, por favor ingresar apodo.

-----

***If Q405 is greater than 9 then skip to Q424***

***If not, then skip to instruction before Q426.***

Q424. Hasta ahora has nombrado a [Response to Q406], [Response to Q408], [Response to Q410], [Response to Q412], [Response to Q414], [Response to Q416], [Response to Q418], [Response to Q420] y a [Response to Q422]. ¿Cuál es el nombre de la 10a persona?

-----

***If Q424 is equal to "Se rehúsa a contestar", then skip to instruction before Q446.***

Q425. ¿Me puedes decir el apodo de [Response to Q424], si es que tiene un apodo? Entrevistador, por favor anotar el apodo.

-----

***If Q405 is greater than 10 then skip to Q426***

***If not, then skip to instruction before Q428.***

Q426. Hasta ahora has nombrado a [Response to Q406], [Response to Q408], [Response to Q410], [Response to Q412], [Response to Q414], [Response to Q416], [Response to Q418], [Response to Q420], [Response to Q422] y a [Response to Q424]. ¿Cuál es el nombre de la 11a persona?

-----

***If Q426 is equal to "Se rehúsa a contestar", then skip to instruction before Q446.***

Q427. ¿Me puedes decir el apodo de [Response to Q426], si es que tiene un apodo? Entrevistador, por favor anotar el apodo.

-----

***If Q405 is greater than 11 then skip to Q428***

***If not, then skip to instruction before Q430.***

Q428. Hasta ahora has nombrado a [Response to Q406], [Response to Q408], [Response to Q410], [Response to Q412], [Response to Q414], [Response to Q416], [Response to Q418], [Response to Q420], [Response to Q422], [Response to Q424] y a [Response to Q426]. ¿Cuál es el nombre de la 12a persona?

-----

***If Q428 is equal to "Se rehúsa a contestar", then skip to instruction before Q446.***

Q429. ¿Me puedes decir el apodo de [Response to Q428], si es que tiene un apodo? Entrevistador, por favor anotar el apodo.

---

***If Q405 is greater than 12 then skip to Q430***

***If not, then skip to instruction before Q432.***

Q430. Hasta ahora has nombrado a [Response to Q406], [Response to Q408], [Response to Q410], [Response to Q412], [Response to Q414], [Response to Q416], [Response to Q418], [Response to Q420], [Response to Q422], [Response to Q424], [Response to Q426] y a [Response to Q428]. ¿Cuál es el nombre de la 13a persona?

---

***If Q430 is equal to "Se rehúsa a contestar", then skip to instruction before Q446.***

Q431. ¿Me puedes decir el apodo de [Response to Q430], si es que tiene un apodo? Entrevistador, por favor anotar el apodo.

---

***If Q405 is greater than 13 then skip to Q432***

***If not, then skip to instruction before Q434.***

Q432. Hasta ahora has nombrado a [Response to Q406], [Response to Q408], [Response to Q410], [Response to Q412], [Response to Q414], [Response to Q416], [Response to Q418], [Response to Q420], [Response to Q422], [Response to Q424], [Response to Q426], [Response to Q428] y a [Response to Q430]. ¿Cuál es el nombre de la 14a persona?

---

***If Q432 is equal to "Se rehúsa a contestar", then skip to instruction before Q446.***

Q433. ¿Me puedes decir el apodo de [Response to Q432], si es que tiene un apodo? Entrevistador, por favor anotar el apodo.

---

***If Q405 is greater than 14 then skip to Q434***

***If not, then skip to instruction before Q436.***

Q434. Hasta ahora has nombrado a [Response to Q406], [Response to Q408], [Response to Q410], [Response to Q412], [Response to Q414], [Response to Q416], [Response to Q418], [Response to Q420], [Response to Q422], [Response to Q424], [Response to Q426], [Response to Q428], [Response to Q430] y a [Response to Q432]. ¿Cuál es el nombre de la 15a persona?

-----

***If Q434 is equal to "Se rehúsa a contestar", then skip to instruction before Q446.***

Q435. ¿Me puedes decir el apodo de [Response to Q434], si es que tiene un apodo? Entrevistador, por favor anotar el apodo.

-----

***If Q405 is greater than 15 then skip to Q436***

***If not, then skip to instruction before Q438.***

Q436. Hasta ahora has nombrado a [Response to Q406], [Response to Q408], [Response to Q410], [Response to Q412], [Response to Q414], [Response to Q416], [Response to Q418], [Response to Q420], [Response to Q422], [Response to Q424], [Response to Q426], [Response to Q428], [Response to Q430], [Response to Q432], y a [Response to Q434]. ¿Cuál es el nombre de la 16a persona?  
Nombre de la 16a persona. TRANSLATION

-----

***If Q436 is equal to "Se rehúsa a contestar", then skip to instruction before Q446.***

Q437. ¿Me puedes decir el apodo de [Response to Q436], si es que tiene un apodo? Entrevistador, por favor anotar el apodo.

-----

***If Q405 is greater than 16 then skip to Q438***

***If not, then skip to instruction before Q440.***

Q438. Hasta ahora has nombrado a [Response to Q406], [Response to Q408], [Response to Q410], [Response to Q412], [Response to Q414], [Response to Q416], [Response to Q418], [Response to Q420], [Response to Q422], [Response to Q424], [Response to Q426], [Response to Q428], [Response to Q430], [Response to Q432], [Response to Q434] and [Response to Q436]. ¿Cuál es el nombre de la 17a persona?

-----



***If Q438 is equal to "Se rehúsa a contestar", then skip to instruction before Q446.***

Q439. ¿Me puedes decir el apodo de [Response to Q438], si es que tiene un apodo? Entrevistador, por favor anotar el apodo.

-----

***If Q405 is greater than 17 then skip to Q440***

***If not, then skip to instruction before Q442.***

Q440. Hasta ahora has nombrado a [Response to Q406], [Response to Q408], [Response to Q410], [Response to Q412], [Response to Q414], [Response to Q416], [Response to Q418], [Response to Q420], [Response to Q422], [Response to Q424], [Response to Q426], [Response to Q428], [Response to Q430], [Response to Q432], [Response to Q434], [Response to Q436] y a [Response to Q438]. ¿Cuál es el nombre de la 18a persona?

-----

***If Q440 is equal to "Se rehúsa a contestar", then skip to instruction before Q446.***

Q441. ¿Me puedes decir el apodo de [Response to Q440], si es que tiene un apodo? Entrevistador, por favor anotar el apodo.

-----

***If Q405 is greater than 18 then skip to Q442***

***If not, then skip to instruction before Q444.***

Q442. Hasta ahora has nombrado a [Response to Q406], [Response to Q408], [Response to Q410], [Response to Q412], [Response to Q414], [Response to Q416], [Response to Q418], [Response to Q420], [Response to Q422], [Response to Q424], [Response to Q426], [Response to Q428], [Response to Q430], [Response to Q432], [Response to Q434], [Response to Q436], [Response to Q438], y a [Response to Q440]. ¿Cuál es el nombre de la 19a persona?

-----

***If Q442 is equal to "Se rehúsa a contestar", then skip to instruction before Q446.***

Q443. ¿Me puedes decir el apodo de [Response to Q442], si es que tiene un apodo? Entrevistador, por favor anotar el apodo.

-----



***If Q447 is greater than Q446 then READ: "El participante dice que ha conocido a esta persona por un tiempo más largo que la edad de la persona. Lo estamos redireccionando para que se hagan las correcciones necesarias." and skip to Q446.***

Q448. ¿Cuál es tu relación con [Response to Q406]? (Elija Uno)

- 1 Romántica o pareja sexual
- 2 Amigo/a
- 3 Vecino/a o compañero de casa
- 4 Compañero/a de trabajo o jefe/a
- 5 Familia - familiares de sangre o por matrimonio
- 6 Relacionado con drogas o alcohol
- 7 OTRO [especifica]
- 8 Se rehúsa a contestar

***If Q448 is equal to 1 then skip to Q449***

***If not, then skip to instruction before Q450.***

Q449. Es [Response to Q406] tu: (Elija Uno)

- 1 Esposo/a
- 2 Pareja romántica actual
- 3 Expareja romántica
- 4 Pareja sexual (no romántica)
- 5 OTRO [especifica]
- 8 Se rehúsa a contestar

***If Q449 is equal to 5 then skip to Q450***

***If not, then skip to instruction before Q451.***

Q450. Por favor especifica tu relación con [Response to Q406].

---

***If Q448 is equal to 2 then skip to Q451***

***If not, then skip to instruction before Q452.***

- Q451. Es [Response to Q406] tu: (Elija Uno)
- |   |                       |
|---|-----------------------|
| 1 | Mejor amigo/a         |
| 2 | Amigo/a cercano/a     |
| 3 | Amigo/a               |
| 4 | Conocido/a            |
| 5 | OTRO [especifica]     |
| 8 | Se rehúsa a contestar |

***If Q451 is equal to 5 then skip to Q452***

***If not, then skip to instruction before Q453.***

Q452. Por favor especifica tu relación con [Response to Q406]

---

***If Q448 is equal to 3 then skip to Q453***

***If not, then skip to instruction before Q454.***

- Q453. Es [Response to Q406] tu: (Elija Uno)
- |   |                            |
|---|----------------------------|
| 1 | Vecino/a                   |
| 2 | Compañero de cuarto o casa |
| 3 | OTRO [especifica]          |
| 8 | Se rehúsa a contestar      |

***If Q453 is equal to 3 then skip to Q454***

***If not, then skip to instruction before Q455.***

Q454. Por favor especifica tu relación con [Response to Q406]

---

***If Q448 is equal to 4 then skip to Q455***

***If not, then skip to instruction before Q456.***

- Q455. Es [Response to Q406] tu: (Elija Uno)
- |   |                        |
|---|------------------------|
| 1 | Compañero/a de trabajo |
| 2 | Jefe/a                 |
| 3 | OTRO [especifica]      |
| 8 | Se rehúsa a contestar  |

***If Q455 is equal to 3 then skip to Q456***

***If not, then skip to instruction before Q457.***

Q456. Por favor especifica tu relación con [Response to Q406].

-----

***If Q448 is equal to 5 then skip to Q457***

***If not, then skip to instruction before Q458.***

- Q457. Es [Response to Q406] tu: (Elija Uno)
- |   |                                  |
|---|----------------------------------|
| 1 | Padre/Madre/Padraastro/Madrastra |
| 2 | Hijo/a                           |
| 3 | Hermano/a o Medio-Hermano/a      |
| 4 | Cuñado o cuñada                  |
| 5 | OTRO FAMILIAR [especifica]       |
| 8 | Se rehúsa a contestar            |

***If Q457 is equal to 5 then skip to Q458***

***If not, then skip to instruction before Q459.***

Q458. Por favor especifica tu relación con [Response to Q406].

-----

***If Q448 is equal to 6 then skip to Q459***

***If not, then skip to instruction before Q460.***

Q459. Es [Response to Q406] tu: (Elija Uno)

- 1 Camarero/a
- 2 Distribuidor de drogas
- 3 Alguien quien inyecta a otros por una tarifa o por drogas
- 4 Cliente de venta de drogas (alguien a quien le vendes droga)
- 5 Compañero/a para beber
- 6 Alguien con quien tu usas drogas
- 7 Otro
- 8 Se rehúsa a contestar

***If Q459 is equal to 7 then skip to Q460***

***If not, then skip to instruction before Q461.***

Q460. Por favor especifica tu relación con [Response to Q406].

-----

***If Q448 is equal to 7 then skip to Q461***

***If not, then skip to instruction before Q462.***

Q461. Es [Response to Q406] tu: (Elija Uno)

- 1 Consejero religioso o espiritual
- 2 Maestro u otro tipo de educador
- 3 Profesional Medico
- 4 Profesional en salud mental
- 5 OTRO [especifica]
- 8 Se rehúsa a contestar

***If Q461 is equal to 5 then skip to Q462***

***If not, then skip to instruction before Q463.***

Q462. Por favor especifica tu relación con [Response to Q406].

-----  
***If Q448 is not equal to 5 and Q448 is not equal to 8 then skip to Q463***

***If not, then skip to Q464.***

Q463. ¿Tuviste sexo vaginal o anal con [Response to Q406] en los 6 meses anteriores?

- 1 Si
- 0 No
- 8 Se rehúsa a contestar

Q464. ¿Es [Respuesta a Q330] hombre, mujer o transgénero, no binario u otro? (Elija Uno)

- 1 Hombre
- 2 Mujer
- 3 Mujer transgénero (hombre a mujer)
- 4 Hombre transgénero (mujer a hombre)
- 5 No binario/género fluido/ sin género
- 6 Otra identidad no incluida
- 8 Se rehúsa a contestar

Q465. Por favor dime qué tan seguido te comunicas con [Respuesta a Q330] (en persona, por teléfono, correo electrónico y/o por redes sociales, como Facebook) (Elija Uno)

- 01 Todos los días
- 02 Varias veces a la semana
- 03 Una vez a la semana
- 04 Una vez cada 2 semanas
- 05 Una vez al mes
- 06 Varias veces al año
- 07 Una vez al año
- 08 Menos de una vez al año
- 98 Se rehúsa a contestar

Q466. ¿Qué tan cercano/a te sientes a [Response to Q406]? (Elija Uno)

- 1 Muy cercano/a
- 2 Algo cercano/a
- 3 No tan cercano
- 4 No cercano
- 8 Se rehúsa a contestar

Q467. ¿Cuánto hace que te sientes así de cercano/a con [Respuesta a Q330]?

- — AÑOS
- — MESES
- — DÍAS
- 97 No Sabe (Años)
- 98 Se rehúsa a contestar (Años)





***If Q470 is equal to 1 then skip to Q471***

***If not, then skip to instruction before Q472.***

- Q471. Es [Response to Q408] tu: (Elija Uno)
- |   |                              |
|---|------------------------------|
| 1 | Esposo/a                     |
| 2 | Pareja romántica actual      |
| 3 | Expareja romántica           |
| 4 | Pareja sexual (no romántica) |
| 5 | OTRO [especifica]            |
| 8 | Se rehúsa a contestar        |

***If Q471 is equal to 5 then skip to Q472***

***If not, then skip to instruction before Q473.***

Q472. Por favor especifica tu relación con [Response to Q408].

---

***If Q470 is equal to 2 then skip to Q473***

***If not, then skip to instruction before Q474.***

- Q473. Es [Response to Q408] tu: (Elija Uno)
- |   |                       |
|---|-----------------------|
| 1 | Mejor amigo/a         |
| 2 | Amigo/a cercano/a     |
| 3 | Amigo/a               |
| 4 | Conocido/a            |
| 5 | OTRO [especifica]     |
| 8 | Se rehúsa a contestar |

***If Q473 is equal to 5 then skip to Q474***

***If not, then skip to instruction before Q475.***

Q474. Por favor especifica tu relación con [Response to Q408].

---

*If Q470 is equal to 3 then skip to Q475*

*If not, then skip to instruction before Q476.*

Q475. Es [Response to Q408] tu: (Elija Uno)

|   |                            |
|---|----------------------------|
| 1 | Vecino/a                   |
| 2 | Compañero de cuarto o casa |
| 3 | OTRO [especifica]          |
| 8 | Se rehúsa a contestar      |

*If Q475 is equal to 3 then skip to Q476*

*If not, then skip to instruction before Q477.*

Q476. Por favor especifica tu relación con [Response to Q408].

---

*If Q470 is equal to 4 then skip to Q477*

*If not, then skip to instruction before Q478.*

Q477. Es [Response to Q408] tu: (Elija Uno)

|   |                        |
|---|------------------------|
| 1 | Compañero/a de trabajo |
| 2 | Jefe/a                 |
| 3 | OTRO [especifica]      |
| 8 | Se rehúsa a contestar  |

*If Q477 is equal to 3 then skip to Q478*

*If not, then skip to instruction before Q479.*

Q478. Por favor especifica tu relación con [Response to Q408].

---

*If Q470 is equal to 5 then skip to Q479*

***If not, then skip to instruction before Q480.***

- Q479. Es [Response to Q408] tu: (Elija Uno)
- |   |                                 |
|---|---------------------------------|
| 1 | Padre/Madre/Padrastro/Madrastra |
| 2 | Hijo/a                          |
| 3 | Hermano/a o Medio-Hermano/a     |
| 4 | Cuñado o cuñada                 |
| 5 | OTRO FAMILIAR [especifica]      |
| 8 | Se rehúsa a contestar           |

***If Q479 is equal to 5 then skip to Q480***

***If not, then skip to instruction before Q481.***

Q480. Por favor especifica tu relación con [Response to Q408].

---

***If Q470 is equal to 6 then skip to Q481***

***If not, then skip to instruction before Q482.***

Q481. Es [Response to Q408] tu: (Elija Uno)

- |   |                                                              |
|---|--------------------------------------------------------------|
| 1 | Camarero/a                                                   |
| 2 | Distribuidor de drogas                                       |
| 3 | Alguien quien inyecta a otros por una tarifa o por drogas    |
| 4 | Cliente de venta de drogas (alguien a quien le vendes droga) |
| 5 | Compañero/a para beber                                       |
| 6 | Alguien con quien tú usas drogas                             |
| 7 | OTRO [especifica]                                            |
| 8 | Se rehúsa a contestar                                        |

***If Q481 is equal to 7 then skip to Q482***

*If not, then skip to instruction before Q483.*

Q482. Por favor especifica tu relación con [Response to Q408].

---

*If Q470 is equal to 7 then skip to Q483*

*If not, then skip to instruction before Q484.*

Q483. Es [Response to Q408] tu: (Elija Uno)

|   |                                  |
|---|----------------------------------|
| 1 | Consejero religioso o espiritual |
| 2 | Maestro u otro tipo de educador  |
| 3 | Profesional Medico               |
| 4 | Profesional en salud mental      |
| 5 | OTRO [especifica]                |
| 8 | Se rehúsa a contestar            |

*If Q483 is equal to 5 then skip to Q484*

*If not, then skip to instruction before Q485.*

Q484. Por favor especifica tu relación con [Response to Q408].

---

*If Q470 is not equal to 5 and Q470 is not equal to 8 then skip to Q485*

*If not, then skip to Q486.*

Q485. ¿Tuviste sexo vaginal o anal con [Response to Q408] en los 6 meses anteriores?

|   |                       |
|---|-----------------------|
| 1 | Si                    |
| 0 | No                    |
| 8 | Se rehúsa a contestar |

Q486. ¿Es [Respuesta a Q332] hombre, mujer o transgénero? (Elija Uno)

- 1 Hombre
- 2 Mujer
- 3 Mujer transgénero
- 4 Hombre transgénero
- 5 No binario/género fluido/ agénero
- 6 Otro no en la lista
- 8 Se rehúsa a contestar

Q487. Por favor dime que tan seguido te comunicas con [Response to Q408] (por teléfono, correo electrónico y/o por redes sociales, como Facebook) (Elija Uno)

- 01 Todos los días
- 02 Varias veces a la semana
- 03 Una vez a la semana
- 04 Una vez cada 2 semanas
- 05 Una vez al mes
- 06 Varias veces al año
- 07 Una vez al año
- 08 Menos de una vez al año
- 98 Se rehúsa a contestar

Q488. ¿Qué tan cercano/a te sientes a [Response to Q408]? (Elija Uno)

- 1 Muy cercano/a
- 2 Algo cercano/a
- 3 No tan cercano
- 4 No cercano
- 8 Se rehúsa a contestar

Q489. ¿Cuánto llevas de sentirte así de cercano/a con [Response to Q408]?

- \_\_\_ AÑOS
- \_\_\_ MESES
- \_\_\_ DÍAS
- 97 No Sabe (Años)
- 98 Se rehúsa a contestar (Años)

*If Q489 is greater than Q469 and Q469 is not equal to 97 and Q469 is not equal to 98 then READ: "La respuesta es mayor a las veces que tú nos dijiste que conoces a &[NAME2]. Por favor revisa la respuesta." and skip to Q489.*

*If Q405 is greater than 2 and Q410 is not equal to "Se rehúsa a contestar" and Q410 is not equal to "Saltó" then skip to Q490*

*If not, then skip to instruction before Q512.*

Q490. ¿Cuál es la edad de [Response to Q410]?

- \_\_\_
- 97 No Sabe
- 98 Se rehúsa a contestar





***If Q493 is equal to 5 then skip to Q494***

***If not, then skip to instruction before Q495.***

Q494. Por favor especifica tu relación con [Response to Q410].

-----

***If Q492 is equal to 2 then skip to Q495***

***If not, then skip to instruction before Q496.***

- Q495. Es [Response to Q410] tu: (Elija Uno)
- |   |                       |
|---|-----------------------|
| 1 | Mejor amigo/a         |
| 2 | Amigo/a cercano/a     |
| 3 | Amigo/a               |
| 4 | Conocido/a            |
| 5 | OTRO [especifica]     |
| 8 | Se rehúsa a contestar |

***If Q495 is equal to 5 then skip to Q496***

***If not, then skip to instruction before Q497.***

Q496. Por favor especifica tu relación con [Response to Q410].

-----

***If Q492 is equal to 3 then skip to Q497***

***If not, then skip to instruction before Q498.***

- Q497. Es [Response to Q410] tu: (Elija Uno)
- |   |                            |
|---|----------------------------|
| 1 | Vecino/a                   |
| 2 | Compañero de cuarto o casa |
| 3 | OTRO [especifica]          |
| 8 | Se rehúsa a contestar      |

***If Q497 is equal to 3 then skip to Q498***

*If not, then skip to instruction before Q499.*

Q498. Por favor especifica tu relación con [Response to Q410].

---

*If Q492 is equal to 4 then skip to Q499*

*If not, then skip to instruction before Q500.*

Q499. Es [Response to Q410] tu: (Elija Uno)

|   |                        |
|---|------------------------|
| 1 | Compañero/a de trabajo |
| 2 | Jefe/a                 |
| 3 | OTRO [especifica]      |
| 8 | Se rehúsa a contestar  |

*If Q499 is equal to 3 then skip to Q500*

*If not, then skip to instruction before Q501.*

Q500. Por favor especifica tu relación con [Response to Q410].

---

*If Q492 is equal to 5 then skip to Q501*

*If not, then skip to instruction before Q502.*

Q501. Es [Response to Q410] tu: (Elija Uno)

|   |                                  |
|---|----------------------------------|
| 1 | Padre/Madre/Padraastro/Madrastra |
| 2 | Hijo/a                           |
| 3 | Hermano/a o Medio-Hermano/a      |
| 4 | Cuñado o cuñada                  |
| 5 | OTRO FAMILIAR [especifica]       |
| 8 | Se rehúsa a contestar            |

*If Q501 is equal to 5 then skip to Q502*

*If not, then skip to instruction before Q503.*

Q502. Por favor especifica tu relación con [Response to Q410].

---

***If Q492 is equal to 6 then skip to Q503***

***If not, then skip to instruction before Q504.***

Q503. Es [Response to Q410] tu: (Elija Uno)

- 1 Camarero/a
- 2 Distribuidor de drogas
- 3 Alguien quien inyecta a otros por una tarifa o por drogas
- 4 Cliente de venta de drogas (alguien a quien le vendes droga)
- 5 Compañero/a para beber
- 6 Alguien con quien tú usas drogas
- 7 OTRO [especifica]
- 8 Se rehúsa a contestar

***If Q503 is equal to 7 then skip to Q504***

***If not, then skip to instruction before Q505.***

Q504. Por favor especifica tu relación con [Response to Q410].

---

***If Q492 is equal to 7 then skip to Q505***

***If not, then skip to instruction before Q506.***

- Q505. Es [Response to Q410] tu: (Elija Uno)
- |   |                                  |
|---|----------------------------------|
| 1 | Consejero religioso o espiritual |
| 2 | Maestro u otro tipo de educador  |
| 3 | Profesional Medico               |
| 4 | Profesional en salud mental      |
| 5 | OTRO [especifica]                |
| 8 | Se rehúsa a contestar            |

*If Q505 is equal to 5 then skip to Q506*

*If not, then skip to instruction before Q507.*

Q506. Por favor especifica tu relación con [Response to Q410].

-----

*If Q492 is not equal to 5 and Q492 is not equal to 8 then skip to Q507*

*If not, then skip to Q508.*

Q507. ¿Tuviste sexo vaginal o anal con [Response to Q410] en los 6 meses anteriores?

- |   |                       |
|---|-----------------------|
| 1 | Si                    |
| 0 | No                    |
| 8 | Se rehúsa a contestar |

Q508. Es ¿[Response to Q410] hombre, mujer o transgénero? (Elija Uno)

- 1 Hombre
- 2 Mujer
- 3 Mujer transgénero
- 4 Hombre transgénero
- 5 No binario/género fluido/ agénero
- 6 Otro no en la lista
- 8 Se rehúsa a contestar

Q509. Por favor dime qué tan seguido te comunicas con [Response to Q410] (por teléfono, correo electrónico y/o por redes sociales, como Facebook) (Elija Uno)

- 01 Todos los días
- 02 Varias veces a la semana
- 03 Una vez a la semana
- 04 Una vez cada 2 semanas
- 05 Una vez al mes
- 06 Varias veces al año
- 07 Una vez al año
- 08 Menos de una vez al año
- 98 Se rehúsa a contestar

Q510. ¿Qué tan cercano/a te sientes a [Response to Q410]? (Elija Uno)

- 1 Muy cercano/a
- 2 Algo cercano/a
- 3 No tan cercano
- 4 No cercano
- 8 Se rehúsa a contestar

Q511. ¿Cuánto llevas de sentirte así de cercano/a con [Response to Q410]?

- — AÑOS
- — MESES
- — DÍAS
- 97 No Sabe (Años)
- 98 Se rehúsa a contestar (Años)

*If Q511 is greater than Q491 and Q491 is not equal to 97 and Q491 is not equal to 98 then READ: "La respuesta es mayor a las veces que tú nos dijiste que conoces a &[NAME3]. Por favor revisa la respuesta." and skip to Q511.*

*If Q405 is greater than 3 and Q412 is not equal to "Se rehúsa a contestar" and Q412 is not equal to "Saltó" then skip to Q512*

*If not, then skip to instruction before Q534.*

Q512. ¿Cuál es la edad de [Response to Q412]?

- —
- 97 No Sabe
- 98 Se rehúsa a contestar



***If Q515 is equal to 5 then skip to Q516***

***If not, then skip to instruction before Q517.***

Q516. Por favor especifica tu relación con [Response to Q412].

-----

***If Q514 is equal to 2 then skip to Q517***

***If not, then skip to instruction before Q518.***

Q517. Es [Response to Q412] tu: (Elija Uno)

|   |                       |
|---|-----------------------|
| 1 | Mejor amigo/a         |
| 2 | Amigo/a cercano/a     |
| 3 | Amigo/a               |
| 4 | Conocido/a            |
| 5 | OTRO [especifica]     |
| 8 | Se rehúsa a contestar |

***If Q517 is equal to 5 then skip to Q518***

***If not, then skip to instruction before Q519.***

Q518. Por favor especifica tu relación con [Response to Q412].

-----

***If Q514 is equal to 3 then skip to Q519***

***If not, then skip to instruction before Q520.***

Q519. Es [Response to Q412] tu: (Elija Uno)

|   |                            |
|---|----------------------------|
| 1 | Vecino/a                   |
| 2 | Compañero de cuarto o casa |
| 3 | OTRO [especifica]          |
| 8 | Se rehúsa a contestar      |

***If Q519 is equal to 3 then skip to Q520***



*If not, then skip to instruction before Q521.*

Q520. Por favor especifica tu relación con [Response to Q412].

---

*If Q514 is equal to 4 then skip to Q521*

*If not, then skip to instruction before Q522.*

Q521. Es [Response to Q412] tu: (Elija Uno)

|   |                        |
|---|------------------------|
| 1 | Compañero/a de trabajo |
| 2 | Jefe/a                 |
| 3 | OTRO [especifica]      |
| 8 | Se rehúsa a contestar  |

*If Q521 is equal to 3 then skip to Q522*

*If not, then skip to instruction before Q523.*

Q522. Por favor especifica tu relación con [Response to Q412].

---

*If Q514 is equal to 5 then skip to Q523*

*If not, then skip to instruction before Q524.*

Q523. Es [Response to Q412] tu: (Elija Uno)

|   |                                  |
|---|----------------------------------|
| 1 | Padre/Madre/Padraastro/Madrastra |
| 2 | Hijo/a                           |
| 3 | Hermano/a o Medio-Hermano/a      |
| 4 | Cuñado o cuñada                  |
| 5 | OTRO FAMILIAR [especifica]       |
| 8 | Se rehúsa a contestar            |

*If Q523 is equal to 5 then skip to Q524*

*If not, then skip to instruction before Q525.*

Q524. Por favor especifica tu relación con [Response to Q412].

---

*If Q514 is equal to 6 then skip to Q525*

*If not, then skip to instruction before Q526.*

Q525. Es [Response to Q412] tu: (Elija Uno)

- 1 Camarero/a
- 2 Distribuidor de drogas
- 3 Alguien quien inyecta a otros por una tarifa o por drogas
- 4 Cliente de venta de drogas (alguien a quien le vendes droga)
- 5 Compañero/a para beber
- 6 Alguien con quien tú usas drogas
- 7 OTRO [especifica]
- 8 Se rehúsa a contestar

*If Q525 is equal to 7 then skip to Q526*

*If not, then skip to instruction before Q527.*

Q526. Por favor especifica tu relación con [Response to Q412].

---

*If Q514 is equal to 7 then skip to Q527*

*If not, then skip to instruction before Q528.*

- Q527. Es [Response to Q412] tu: (Elija Uno)
- |   |                                  |
|---|----------------------------------|
| 1 | Consejero religioso o espiritual |
| 2 | Maestro u otro tipo de educador  |
| 3 | Profesional Medico               |
| 4 | Profesional en salud mental      |
| 5 | OTRO [especifica]                |
| 8 | Se rehúsa a contestar            |

*If Q527 is equal to 5 then skip to Q528*

*If not, then skip to instruction before Q529.*

Q528. Por favor especifica tu relación con [Response to Q412].

-----

*If Q514 is not equal to 5 and Q514 is not equal to 8 then skip to Q529*

*If not, then skip to Q530.*

Q529. ¿Tuviste sexo vaginal o anal con [Response to Q412] en los 6 meses anteriores?

- |   |                       |
|---|-----------------------|
| 1 | Si                    |
| 0 | No                    |
| 8 | Se rehúsa a contestar |

Q530. Es ¿[Response to Q410] hombre, mujer o transgénero? (Elija Uno)

- 1 Hombre
- 2 Mujer
- 3 Mujer transgénero
- 4 Hombre transgénero
- 5 No binario/género fluido/ agénero
- 6 Otro no en la lista
- 8 Se rehúsa a contestar

Q531. Por favor dime qué tan seguido te comunicas con [Response to Q412] (por teléfono, correo electrónico y/o por redes sociales, como Facebook) (Elija Uno)

- 01 Todos los días
- 02 Varias veces a la semana
- 03 Una vez a la semana
- 04 Una vez cada 2 semanas
- 05 Una vez al mes
- 06 Varias veces al año
- 07 Una vez al año
- 08 Menos de una vez al año
- 98 Se rehúsa a contestar

Q532. ¿Qué tan cercano/a te sientes a [Response to Q412]? (Elija Uno)

- 1 Muy cercano/a
- 2 Algo cercano/a
- 3 No tan cercano
- 4 No cercano
- 8 Se rehúsa a contestar

Q533. ¿Cuánto llevas de sentirte así de cercano/a con [Response to Q412]?

- \_\_\_ AÑOS
- \_\_\_ MESES
- \_\_\_ DÍAS
- 97 No Sabe (Años)
- 98 Se rehúsa a contestar (Años)

*If Q533 is greater than Q513 and Q513 is not equal to 97 and Q513 is not equal to 98 then READ: "La respuesta es mayor a las veces que tú nos dijiste que conoces a &[NAME4]. Por favor revisa la respuesta." and skip to Q533.*

*If Q405 is greater than 4 and Q414 is not equal to "Se rehúsa a contestar" and Q414 is not equal to "Saltó" then skip to Q534*

*If not, then skip to instruction before Q556.*

Q534. ¿Cuál es la edad de [Response to Q414]?

- \_\_\_
- 97 No Sabe
- 98 Se rehúsa a contestar



***If Q537 is equal to 5 then skip to Q538***

***If not, then skip to instruction before Q539.***

Q538. Por favor especifica tu relación con [Response to Q414].

-----

***If Q536 is equal to 2 then skip to Q539***

***If not, then skip to instruction before Q540.***

Q539. Es [Response to Q414] tu: (Elija Uno)

|   |                       |
|---|-----------------------|
| 1 | Mejor amigo/a         |
| 2 | Amigo/a cercano/a     |
| 3 | Amigo/a               |
| 4 | Conocido/a            |
| 5 | OTRO [especifica]     |
| 8 | Se rehúsa a contestar |

***If Q539 is equal to 5 then skip to Q540***

***If not, then skip to instruction before Q541.***

Q540. Por favor especifica tu relación con [Response to Q414].

-----

***If Q536 is equal to 3 then skip to Q541***

***If not, then skip to instruction before Q542.***

Q541. Es [Response to Q414] tu: (Elija Uno)

|   |                            |
|---|----------------------------|
| 1 | Vecino/a                   |
| 2 | Compañero de cuarto o casa |
| 3 | OTRO [especifica]          |
| 8 | Se rehúsa a contestar      |

***If Q541 is equal to 3 then skip to Q542***

*If not, then skip to instruction before Q543.*

Q542. Por favor especifica tu relación con [Response to Q414].

---

*If Q536 is equal to 4 then skip to Q543*

*If not, then skip to instruction before Q544.*

Q543. Es [Response to Q414] tu: (Elija Uno)

|   |                        |
|---|------------------------|
| 1 | Compañero/a de trabajo |
| 2 | Jefe/a                 |
| 3 | OTRO [especifica]      |
| 8 | Se rehúsa a contestar  |

*If Q543 is equal to 3 then skip to Q544*

*If not, then skip to instruction before Q545.*

Q544. Por favor especifica tu relación con [Response to Q414].

---

*If Q536 is equal to 5 then skip to Q545*

*If not, then skip to instruction before Q546.*

Q545. Es [Response to Q414] tu: (Elija Uno)

|   |                                  |
|---|----------------------------------|
| 1 | Padre/Madre/Padraastro/Madrastra |
| 2 | Hijo/a                           |
| 3 | Hermano/a o Medio-Hermano/a      |
| 4 | Cuñado o cuñada                  |
| 5 | OTRO FAMILIAR [especifica]       |
| 8 | Se rehúsa a contestar            |

*If Q545 is equal to 5 then skip to Q546*

*If not, then skip to instruction before Q547.*



Q546. Por favor especifica tu relación con [Response to Q414].

---

*If Q536 is equal to 6 then skip to Q547*

*If not, then skip to instruction before Q548.*

Q547. Es [Response to Q414] tu: (Elija Uno)

- 1 Camarero/a
- 2 Distribuidor de drogas
- 3 Alguien quien inyecta a otros por una tarifa o por drogas
- 4 Cliente de venta de drogas (alguien a quien le vendes droga)
- 5 Compañero/a para beber
- 6 Alguien con quien tú usas drogas
- 7 OTRO [especifica]
- 8 Se rehúsa a contestar

*If Q547 is equal to 7 then skip to Q548*

*If not, then skip to instruction before Q549.*

Q548. Por favor especifica tu relación con [Response to Q414].

---

*If Q536 is equal to 7 then skip to Q549*

*If not, then skip to instruction before Q550.*

- Q549. Es [Response to Q414] tu: (Elija Uno)
- |   |                                  |
|---|----------------------------------|
| 1 | Consejero religioso o espiritual |
| 2 | Maestro u otro tipo de educador  |
| 3 | Profesional Medico               |
| 4 | Profesional en salud mental      |
| 5 | OTRO [especifica]                |
| 8 | Se rehúsa a contestar            |

*If Q549 is equal to 5 then skip to Q550*

*If not, then skip to instruction before Q551.*

Q550. Por favor especifica tu relación con [Response to Q414].

-----

*If Q536 is not equal to 5 and Q536 is not equal to 8 then skip to Q551*

*If not, then skip to Q552.*

Q551. ¿Tuviste sexo vaginal o anal con [Response to Q414] en los 6 meses anteriores?

- |   |                       |
|---|-----------------------|
| 1 | Si                    |
| 0 | No                    |
| 8 | Se rehúsa a contestar |

Q552. Es ¿[Response to Q414] hombre, mujer o transgénero? (Elija Uno)

- 1 Hombre
- 2 Mujer
- 3 Mujer transgénero
- 4 Hombre transgénero
- 5 No binario/género fluido/ agénero
- 6 Otro no en la lista
- 8 Se rehúsa a contestar

Q553. Por favor dime qué tan seguido te comunicas con [Response to Q414] (por teléfono, correo electrónico y/o por redes sociales, como Facebook) (Elija Uno)

- 01 Todos los días
- 02 Varias veces a la semana
- 03 Una vez a la semana
- 04 Una vez cada 2 semanas
- 05 Una vez al mes
- 06 Varias veces al año
- 07 Una vez al año
- 08 Menos de una vez al año
- 98 Se rehúsa a contestar

Q554. ¿Qué tan cercano/a te sientes a [Response to Q414]? (Elija Uno)

- |   |                       |
|---|-----------------------|
| 1 | Muy cercano/a         |
| 2 | Algo cercano/a        |
| 3 | No tan cercano        |
| 4 | No cercano            |
| 8 | Se rehúsa a contestar |

Q555. ¿Cuánto llevas de sentirte así de cercano/a con [Response to Q414]?

- |       |                              |
|-------|------------------------------|
| __ __ | AÑOS                         |
| __ __ | MESES                        |
| __ __ | DÍAS                         |
| 97    | No Sabe (Años)               |
| 98    | Se rehúsa a contestar (Años) |

*If Q555 is greater than Q535 and Q535 is not equal to 97 and Q535 is not equal to 98 then READ: "La respuesta es mayor a las veces que tú nos dijiste que conoces a &[NAME5]. Por favor revisa la respuesta." and skip to Q555.*

*If Q405 is greater than 1 and Q406 is not equal to "Se rehúsa a contestar" and Q406 is not equal to "Saltó" and Q408 is not equal to "Se rehúsa a contestar" and Q408 is not equal to "Saltó" then skip to instruction before Q556*

*If not, then skip to instruction before Q557.*

*READ: LEA: En el siguiente grupo de preguntas, te voy a dar dos nombres de los que nombraste anteriormente, y te voy a pedir que indiques qué tan frecuentemente estas dos personas se hablan entre si usando las categorías en esta tarjeta. Una vez que hayamos empezado, yo creo que podrás ver que esto funciona fácilmente.*

Q556. ¿Qué tan seguido [Response to Q406] y [Response to Q408] se comunican entre ellos, ya sea platicando en persona, por mensaje de texto, o por chat? (Elija Uno)

- 01 Varias veces al día
- 02 Todos los días
- 03 Varias veces a la semana
- 04 Una vez a la semana
- 05 Una vez cada dos semanas
- 06 Una vez al Mes
- 07 Algunas veces al año
- 08 Una vez al año
- 09 Nunca
- 97 No Sabe
- 98 Se rehúsa a contestar

***If Q405 is greater than 2 and Q406 is not equal to "Se rehúsa a contestar" and Q406 is not equal to "Saltó" and Q410 is not equal to "Se rehúsa a contestar" and Q410 is not equal to "Saltó" then skip to Q557***

***If not, then skip to instruction before Q558.***

Q557. ¿Qué tan seguido [Response to Q406] y [Response to Q410] se comunican entre ellos, ya sea platicando en persona, por mensaje de texto, o por chat? (Elija Uno)

- |    |                          |
|----|--------------------------|
| 01 | Varias veces al día      |
| 02 | Todos los días           |
| 03 | Varias veces a la semana |
| 04 | Una vez a la semana      |
| 05 | Una vez cada dos semanas |
| 06 | Una vez al Mes           |
| 07 | Algunas veces al año     |
| 08 | Una vez al año           |
| 09 | Nunca                    |
| 97 | No Sabe                  |
| 98 | Se rehúsa a contestar    |

***If Q405 is greater than 3 and Q406 is not equal to "Se rehúsa a contestar" and Q406 is not equal to "Saltó" and Q412 is not equal to "Se rehúsa a contestar" and Q412 is not equal to "Saltó" then skip to Q558***

***If not, then skip to instruction before Q559.***

Q558. ¿Qué tan seguido [Response to Q406] y [Response to Q412] se comunican entre ellos, ya sea platicando en persona, por mensaje de texto, o por chat? (Elija Uno)

- 01 Varias veces al día
- 02 Todos los días
- 03 Varias veces a la semana
- 04 Una vez a la semana
- 05 Una vez cada dos semanas
- 06 Una vez al Mes
- 07 Algunas veces al año
- 08 Una vez al año
- 09 Nunca
- 97 No Sabe
- 98 Se rehúsa a contestar

***If Q405 is greater than 4 and Q406 is not equal to "Se rehúsa a contestar" and Q406 is not equal to "Saltó" and Q414 is not equal to "Se rehúsa a contestar" and Q414 is not equal to "Saltó" then skip to Q559***

***If not, then skip to instruction before Q560.***

Q559. ¿Qué tan seguido [Response to Q406] y [Response to Q414] se comunican entre ellos, ya sea platicando en persona, por mensaje de texto, o por chat? (Elija Uno)

- |    |                          |
|----|--------------------------|
| 01 | Varias veces al día      |
| 02 | Todos los días           |
| 03 | Varias veces a la semana |
| 04 | Una vez a la semana      |
| 05 | Una vez cada dos semanas |
| 06 | Una vez al Mes           |
| 07 | Algunas veces al año     |
| 08 | Una vez al año           |
| 09 | Nunca                    |
| 97 | No Sabe                  |
| 98 | Se rehúsa a contestar    |

***If Q405 is greater than 2 and Q408 is not equal to "Se rehúsa a contestar" and Q408 is not equal to "Saltó" and Q410 is not equal to "Se rehúsa a contestar" and Q410 is not equal to "Saltó" then skip to Q560***

***If not, then skip to instruction before Q561.***



Q560. ¿Qué tan seguido [Response to Q408] y [Response to Q410] se comunican entre ellos, ya sea platicando en persona, por mensaje de texto, o por chat? (Elija Uno)

- 01 Varias veces al día
- 02 Todos los días
- 03 Varias veces a la semana
- 04 Una vez a la semana
- 05 Una vez cada dos semanas
- 06 Una vez al Mes
- 07 Algunas veces al año
- 08 Una vez al año
- 09 Nunca
- 97 No Sabe
- 98 Se rehúsa a contestar

***If Q405 is greater than 3 and Q408 is not equal to "Se rehúsa a contestar" and Q408 is not equal to "Saltó" and Q412 is not equal to "Se rehúsa a contestar" and Q412 is not equal to "Saltó" then skip to Q561***

***If not, then skip to instruction before Q562.***

Q561. ¿Qué tan seguido [Response to Q408] y [Response to Q412] se comunican entre ellos, ya sea platicando en persona, por mensaje de texto, o por chat? (Elija Uno)

- |    |                          |
|----|--------------------------|
| 01 | Varias veces al día      |
| 02 | Todos los días           |
| 03 | Varias veces a la semana |
| 04 | Una vez a la semana      |
| 05 | Una vez cada dos semanas |
| 06 | Una vez al Mes           |
| 07 | Algunas veces al año     |
| 08 | Una vez al año           |
| 09 | Nunca                    |
| 97 | No Sabe                  |
| 98 | Se rehúsa a contestar    |

***If Q405 is greater than 4 and Q408 is not equal to "Se rehúsa a contestar" and Q408 is not equal to "Saltó" and Q414 is not equal to "Se rehúsa a contestar" and Q414 is not equal to "Saltó" then skip to Q562***

***If not, then skip to instruction before Q563.***

Q562. ¿Qué tan seguido [Response to Q408] y [Response to Q414] se comunican entre ellos, ya sea platicando en persona, por mensaje de texto, o por chat? (Elija Uno)

- 01 Varias veces al día
- 02 Todos los días
- 03 Varias veces a la semana
- 04 Una vez a la semana
- 05 Una vez cada dos semanas
- 06 Una vez al Mes
- 07 Algunas veces al año
- 08 Una vez al año
- 09 Nunca
- 97 No Sabe
- 98 Se rehúsa a contestar

***If Q405 is greater than 3 and Q410 is not equal to "Se rehúsa a contestar" and Q410 is not equal to "Saltó" and Q412 is not equal to "Se rehúsa a contestar" and Q412 is not equal to "Saltó" then skip to Q563***

***If not, then skip to instruction before Q564.***

Q563. ¿Qué tan seguido [Response to Q410] y [Response to Q412] se comunican entre ellos, ya sea platicando en persona, por mensaje de texto, o por chat? (Elija Uno)

- |    |                          |
|----|--------------------------|
| 01 | Varias veces al día      |
| 02 | Todos los días           |
| 03 | Varias veces a la semana |
| 04 | Una vez a la semana      |
| 05 | Una vez cada dos semanas |
| 06 | Una vez al Mes           |
| 07 | Algunas veces al año     |
| 08 | Una vez al año           |
| 09 | Nunca                    |
| 97 | No Sabe                  |
| 98 | Se rehúsa a contestar    |

***If Q405 is greater than 4 and Q410 is not equal to "Se rehúsa a contestar" and Q410 is not equal to "Saltó" and Q414 is not equal to "Se rehúsa a contestar" and Q414 is not equal to "Saltó" then skip to Q564***

***If not, then skip to instruction before Q565.***

Q564. ¿Qué tan seguido [Response to Q410] y [Response to Q414] se comunican entre ellos, ya sea platicando en persona, por mensaje de texto, o por chat? (Elija Uno)

- 01 Varias veces al día
- 02 Todos los días
- 03 Varias veces a la semana
- 04 Una vez a la semana
- 05 Una vez cada dos semanas
- 06 Una vez al Mes
- 07 Algunas veces al año
- 08 Una vez al año
- 09 Nunca
- 97 No Sabe
- 98 Se rehúsa a contestar

***If Q405 is greater than 4 and Q412 is not equal to "Se rehúsa a contestar" and Q412 is not equal to "Saltó" and Q414 is not equal to "Se rehúsa a contestar" and Q414 is not equal to "Saltó" then skip to Q565***

***If not, then skip to instruction before Q566.***

Q565. ¿Qué tan seguido [Response to Q412] y [Response to Q414] se comunican entre ellos, ya sea platicando en persona, por mensaje de texto, o por chat? (Elija Uno)

- |    |                          |
|----|--------------------------|
| 01 | Varias veces al día      |
| 02 | Todos los días           |
| 03 | Varias veces a la semana |
| 04 | Una vez a la semana      |
| 05 | Una vez cada dos semanas |
| 06 | Una vez al Mes           |
| 07 | Algunas veces al año     |
| 08 | Una vez al año           |
| 09 | Nunca                    |
| 97 | No Sabe                  |
| 98 | Se rehúsa a contestar    |

***If Q405 is greater than 0 and Q406 is not equal to "Se rehúsa a contestar" and Q406 is not equal to "Saltó" then skip to Q566***

***If not, then skip to instruction before Q590.***

Q566. ¿Qué tan seguido usa drogas [Response to Q406]? (Elija Uno)

- 01 Todos los días
- 02 Varias veces a la semana
- 03 Una vez a la semana
- 04 Una vez cada dos semanas
- 05 Una vez al mes
- 06 Algunas veces al año
- 07 Una vez al año
- 08 Menos de una vez al año
- 09 Nunca
- 10 Usaba drogas anteriormente pero no en el presente
- 97 No Sabe
- 98 Se rehúsa a contestar

*If Q566 is not less than 1 and Q566 is not greater than 8 then skip to Q567*

*If not, then skip to instruction before Q568.*

Q567. ¿Cuál de las siguientes drogas usa [Response to Q406]? (Marque Todas las que Correspondan)

- Alcohol
- Marihuana
- Heroína sola
- Cocaína crack sola
- Cocaína en polvo sola
- Heroína y cocaína juntas (speedball)
- Metanfetaminas/cristal solo
- Metanfetaminas/cristal y heroína juntas
- China White sola
- China White y heroína juntas
- China White y metanfetaminas/cristal juntas
- PCP
- Alucinógenos como ácido, LSD, peyote, mescalina, hongos
- Inhalantes (por ejemplo, pegamento, gasolina, diluyente de pintura, agua celeste u otros químicos)
- Tranquilizantes sin prescripción (Rivotril, Diazepam, Valium, Ativan o Restoril)
- Oxycontin sin prescripción
- Otros opioides de prescripción sin prescripción (Vicodin, Darvon, Percocet)
- Barbitúricos sin prescripción (Amytal, Nembutal y Seconal)
- Otro tipo de droga o combinación que no ha sido mencionada
- No Sabe
- Se rehúsa a contestar

***If Q567S is equal to 1 then skip to Q568***



*If not, then skip to instruction before Q569.*

Q568. Otra droga o combinación de drogas [especifica]

---

*If Q566 is not less than 1 and Q566 is not greater than 8 then skip to Q569*

*If not, then skip to instruction before Q570.*

Q569. Usa ¿[Response to Q406] drogas inyectadas, o no inyectadas, o a veces las usa de una manera y a veces de la otra? (Elija Uno)

- |   |                                |
|---|--------------------------------|
| 1 | Solo usa drogas inyectadas     |
| 2 | Solo usa drogas no inyectadas  |
| 3 | A veces usa drogas inyectables |
| 7 | No Sabe                        |
| 8 | Se rehúsa a contestar          |

*If Q569 is equal to 1 or Q569 is equal to 3 then skip to Q570*

*If not, then skip to instruction before Q571.*

Q570. ¿Alguna vez has usado la jeringa, agua, cacharro o algodón que ya había sido usada por [Response to Q406]?

- |   |                       |
|---|-----------------------|
| 1 | Si                    |
| 0 | No                    |
| 8 | Se rehúsa a contestar |

*If Q566 is not equal to 9 and Q566 is not equal to 97 and Q566 is not equal to 98 then skip to Q571*

*If not, then skip to instruction before Q572.*

Q571. ¿Alguna vez te ha ofrecido o animado a usar drogas [Response to Q406]?

- |   |                       |
|---|-----------------------|
| 1 | Si                    |
| 0 | No                    |
| 8 | Se rehúsa a contestar |

*If Q571 is equal to 1 then skip to Q572*

*If not, then skip to instruction before Q573.*

Q572. ¿Cuál de las siguientes drogas te ha ofrecido o animado a usar [Response to Q406]? (Marque Todas las que Correspondan)

- Alcohol
- Marihuana
- Heroína sola
- Cocaína crack sola
- Cocaína en polvo sola
- Heroína y cocaína juntas (speedball)
- Metanfetaminas/cristal solo
- Metanfetaminas/cristal y heroína juntas
- China White sola
- China White y heroína juntas
- China White y metanfetaminas/cristal juntas
- PCP
- Alucinógenos como ácido, LSD, peyote, mescalina, hongos
- Inhalantes (por ejemplo, pegamento, gasolina, diluyente de pintura, agua celeste u otros químicos)
- Tranquilizantes sin prescripción (Rivotril, Diazepam, Valium, Ativan o Restoril)
- Oxycontin sin prescripción
- Otros opioides de prescripción sin prescripción (Vicodin, Darvon, Percocet)
- Barbitúricos sin prescripción (Amytal, Nembutal y Seconal)
- Otro tipo de droga o combinación que no ha sido mencionada
- Se rehúsa a contestar

***If Q572S is equal to 1 then skip to Q573***

***If not, then skip to Q574.***

Q573. Otra droga o combinación de drogas [especifica]

-----

Q574. ¿Alguna vez [Response to Q406] te ha animado a dejar de usar drogas?

- |   |                       |
|---|-----------------------|
| 1 | Si                    |
| 0 | No                    |
| 8 | Se rehúsa a contestar |

*If Q574 is equal to 1 then skip to Q575*

*If not, then skip to instruction before Q576.*

Q575. ¿Alguna vez [Response to Q406] te ha animado a dejar de usar drogas inyectables específicamente?

- |   |                       |
|---|-----------------------|
| 1 | Si                    |
| 0 | No                    |
| 7 | No Sabe               |
| 8 | Se rehúsa a contestar |

*If Q566 is not equal to 9 and Q566 is not equal to 97 and Q566 is not equal to 98 then skip to Q576*

*If not, then skip to instruction before Q577.*

Q576. ¿Qué edad tenía [Response to Q406] cuando empezó a usar drogas por primera vez?

- |     |                       |
|-----|-----------------------|
| --- |                       |
| 97  | No Sabe               |
| 98  | Se rehúsa a contestar |

*If Q566 is not equal to 9 and Q566 is not equal to 10 and Q566 is not equal to 97 and Q566 is not equal to 98 then skip to Q577*

*If not, then skip to Q578.*

Q577. Considera el uso diario de drogas de [Response to Q406], ¿Alguna vez en su vida ha usado [Response to Q406] el doble de la dosis de droga o la ha mezclado con otra droga?

- 1 Si
- 0 No
- 7 No Sabe
- 8 Se rehúsa a contestar

Q578. ¿Alguna vez en su vida [Response to Q406] ha vivido en la calle, en un albergue, en un hotel, temporalmente con amigos/familiares, en un carro, o en una casa deshabitada?

- 1 Si
- 0 No
- 7 No Sabe
- 8 Se rehúsa a contestar

Q579. ¿Dónde vive [Response to Q406] actualmente? (Elija Uno)

- 1 Condado de San Diego
- 2 Tijuana
- 3 Otro (especifica)
- 7 No Sabe
- 8 Se rehúsa a contestar

*If Q579 is equal to 3 then skip to Q580*

*If not, then skip to instruction before Q581.*

Q580. Por favor especifica donde vive [Response to Q406].

---

*If Q579 is equal to 1 and Q566 is not equal to 9 and Q566 is not equal to 97 and Q566 is not equal to 98 then skip to Q581*

*If not, then skip to instruction before Q582.*

Q581. **En los últimos 6 meses**, ¿ha viajado [Response to Q406] a México para comprar o conseguir drogas?

- 1 Si
- 0 No
- 7 No Sabe
- 8 Se rehúsa a contestar

*If Q581 is equal to 1 then skip to Q582*

*If not, then skip to instruction before Q583.*

Q582. ¿Cuál de los siguientes tipos de drogas compró [Response to Q406] en México? (Marque Todas las que Correspondan)

- Mariguana
- Heroína
- Cocaína crack sola
- Cocaína en polvo sola
- Heroína y cocaína juntas (speedball)
- Metanfetaminas/cristal solo
- Metanfetaminas/cristal y heroína juntas
- China White sola
- China White y heroína juntas
- China White y metanfetaminas/cristal juntas
- PCP
- Alucinógenos como ácido, LSD, peyote, mescalina, hongos
- Inhalantes (por ejemplo, pegamento, gasolina, diluyente de pintura, agua celeste u otros químicos)
- Tranquilizantes sin prescripción (Rivotril, Diazepam, Valium, Ativan o Restoril)
- Oxycontin sin prescripción
- Otros opioides de prescripción sin prescripción (Vicodin, Darvon, Percocet)
- Barbitúricos sin prescripción (Amytal, Nembutal y Seconal)
- Otro tipo de droga o combinación que no ha sido mencionada
- No Sabe
- Se rehúsa a contestar

***If Q582R is equal to 1 then skip to Q583***

***If not, then skip to instruction before Q584.***

Q583. Por favor especifica qué tipo de drogas compró [Response to Q406] en México.

-----

*If Q579 is equal to 1 then skip to Q584*

*If not, then skip to instruction before Q585.*

Q584. **En los últimos 6 meses**, ¿ha viajado [Response to Q406] a México para pagar por sexo con dinero o drogas?

- |   |                       |
|---|-----------------------|
| 1 | Si                    |
| 0 | No                    |
| 7 | No Sabe               |
| 8 | Se rehúsa a contestar |

*If Q579 is equal to 2 and Q566 is not equal to 9 and Q566 is not equal to 97 and Q566 is not equal to 98 then skip to Q585*

*If not, then skip to instruction before Q586.*

Q585. **En los últimos 6 meses**, ¿ha viajado [Response to Q406] a Estados Unidos para comprar o conseguir drogas?

- |   |                       |
|---|-----------------------|
| 1 | Si                    |
| 0 | No                    |
| 7 | No Sabe               |
| 8 | Se rehúsa a contestar |

*If Q585 is equal to 1 then skip to Q586*

*If not, then skip to instruction before Q587.*



Q586. ¿Cuál de los siguientes tipos de drogas compró [Response to Q406] en Estados Unidos?  
(Marque Todas las que Correspondan)

- Mariguana
- Heroína
- Cocaína crack sola
- Cocaína en polvo sola
- Heroína y cocaína juntas (speedball)
- Metanfetaminas/cristal solo
- Metanfetaminas/cristal y heroína juntas
- China White sola
- China White y heroína juntas
- China White y metanfetaminas/cristal juntas
- PCP
- Alucinógenos como acido, LSD, peyote, mescalina, hongos
- Inhalantes (por ejemplo, pegamento, gasolina, diluyente de pintura, agua celeste u otros químicos)
- Tranquilizantes sin prescripción (Rivotril, Diazepam, Valium, Ativan o Restoril)
- Oxycontin sin prescripción
- Otros opioides de prescripción sin prescripción (Vicodin, Darvon, Percocet)
- Barbituricos sin prescripción (Amytal, Nembutal y Seconal)
- Otro tipo de droga o combinación que no ha sido mencionada
- No Sabe
- Se rehúsa a contestar

***If Q586R is equal to 1 then skip to Q587***

***If not, then skip to instruction before Q588.***

Q587. Por favor especifica qué tipo de drogas compró [Response to Q406] en Estados Unidos.

-----  
*If Q579 is equal to 2 then skip to Q588*

*If not, then skip to Q589.*

Q588. **En los últimos 6 meses**, ¿[Response to Q406] ha tenido sexo por dinero o drogas con alguien de los Estados Unidos?

- 1 Si
- 0 No
- 7 No Sabe
- 8 Se rehúsa a contestar

Q589. ¿Alguna vez [Response to Q406] ha sido detenido o arrestado?

- 1 Si
- 0 No
- 7 No Sabe
- 8 Se rehúsa a contestar

*If Q405 is greater than 1 and Q408 is not equal to "Se rehúsa a contestar" and Q408 is not equal to "Saltó" then skip to Q590*

*If not, then skip to instruction before Q614.*

Q590. ¿Qué tan seguido usa drogas [Response to Q408]? (Elija Uno)

- 01 Todos los días
- 02 Varias veces a la semana
- 03 Una vez a la semana
- 04 Una vez cada dos semanas
- 05 Una vez al mes
- 06 Algunas veces al año
- 07 Una vez al año
- 08 Menos de una vez al año
- 09 Nunca
- 10 Usaba drogas anteriormente pero no en el presente
- 97 No Sabe
- 98 Se rehúsa a contestar

***If Q590 is not less than 1 and Q590 is not greater than 8 then skip to Q591***

***If not, then skip to instruction before Q592.***

Q591. ¿Cuál de las siguientes drogas usa [Response to Q408]? (Marque Todas las que Correspondan)

- Alcohol
- Marihuana
- Heroína sola
- Cocaína crack sola
- Cocaína en polvo sola
- Heroína y cocaína juntas (speedball)
- Metanfetaminas/cristal solo
- Metanfetaminas/cristal y heroína juntas
- China White sola
- China White y heroína juntas
- China White y metanfetaminas/cristal juntas
- PCP
- Alucinógenos como ácido, LSD, peyote, mescalina, hongos
- Inhalantes (por ejemplo, pegamento, gasolina, diluyente de pintura, agua celeste u otros químicos)
- Tranquilizantes sin prescripción (Rivotril, Diazepam, Valium, Ativan o Restoril)
- Oxycontin sin prescripción
- Otros opioides de prescripción sin prescripción (Vicodin, Darvon, Percocet)
- Barbitúricos sin prescripción (Amytal, Nembutal y Seconal)
- Otro tipo de droga o combinación que no ha sido mencionada
- No Sabe
- Se rehúsa a contestar

***If Q591S is equal to 1 then skip to Q592***

*If not, then skip to instruction before Q593.*

Q592. Otra droga o combinación de drogas [especifica]

---

*If Q590 is not less than 1 and Q590 is not greater than 8 then skip to Q593*

*If not, then skip to instruction before Q594.*

Q593. Usa ¿[Response to Q408] drogas inyectadas, o no inyectadas, o a veces las usa de una manera y a veces de la otra? (Elija Uno)

- |   |                                |
|---|--------------------------------|
| 1 | Solo usa drogas inyectadas     |
| 2 | Solo usa drogas no inyectadas  |
| 3 | A veces usa drogas inyectables |
| 7 | No Sabe                        |
| 8 | Se rehúsa a contestar          |

*If Q593 is equal to 1 or Q593 is equal to 3 then skip to Q594*

*If not, then skip to instruction before Q595.*

Q594. ¿Alguna vez has usado la jeringa, agua, cacharro o algodón que ya había sido usada por [Response to Q408]?

- |   |                       |
|---|-----------------------|
| 1 | Si                    |
| 0 | No                    |
| 8 | Se rehúsa a contestar |

*If Q590 is not equal to 9 and Q590 is not equal to 97 and Q590 is not equal to 98 then skip to Q595*

*If not, then skip to instruction before Q596.*

Q595. ¿Alguna vez te ha ofrecido o animado a usar drogas [Response to Q408]?

- |   |                       |
|---|-----------------------|
| 1 | Si                    |
| 0 | No                    |
| 8 | Se rehúsa a contestar |

*If Q595 is equal to 1 then skip to Q596*

*If not, then skip to instruction before Q597.*

Q596. ¿Cuál de las siguientes drogas te ha ofrecido o animado a usar [Response to Q408]? (Marque Todas las que Correspondan)

- Alcohol
- Marihuana
- Heroína sola
- Cocaína crack sola
- Cocaína en polvo sola
- Heroína y cocaína juntas (speedball)
- Metanfetaminas/cristal solo
- Metanfetaminas/cristal y heroína juntas
- China White sola
- China White y heroína juntas
- China White y metanfetaminas/cristal juntas
- PCP
- Alucinógenos como ácido, LSD, peyote, mescalina, hongos
- Inhalantes (por ejemplo, pegamento, gasolina, diluyente de pintura, agua celeste u otros químicos)
- Tranquilizantes sin prescripción (Rivotril, Diazepam, Valium, Ativan o Restoril)
- Oxycontin sin prescripción
- Otros opioides de prescripción sin prescripción (Vicodin, Darvon, Percocet)
- Barbitúricos sin prescripción (Amytal, Nembutal y Seconal)
- Otro tipo de droga o combinación que no ha sido mencionada
- Se rehúsa a contestar

***If Q596S is equal to 1 then skip to Q597***

***If not, then skip to Q598.***

Q597. Otra droga o combinación de drogas [especifica]

-----

Q598. ¿Alguna vez [Response to Q408] te ha animado a dejar de usar drogas?

- 1 Si
- 0 No
- 8 Se rehúsa a contestar

*If Q598 is equal to 1 then skip to Q599*

*If not, then skip to instruction before Q600.*

Q599. ¿Alguna vez [Response to Q408] te ha animado a dejar de usar drogas inyectables específicamente?

- 1 Si
- 0 No
- 7 No Sabe
- 8 Se rehúsa a contestar

*If Q590 is not equal to 9 and Q590 is not equal to 97 and Q590 is not equal to 98 then skip to Q600*

*If not, then skip to instruction before Q601.*

Q600. ¿Qué edad tenía [Response to Q408] cuando empezó a usar drogas por primera vez?

- —
- 97 No Sabe
  - 98 Se rehúsa a contestar

*If Q590 is not equal to 9 and Q590 is not equal to 10 and Q590 is not equal to 97 and Q590 is not equal to 98 then skip to Q601*

*If not, then skip to Q602.*



Q601. Considera el uso diario de drogas de [Response to Q408], ¿Alguna vez en su vida ha usado [Response to Q408] el doble de la dosis de droga o la ha mezclado con otra droga?

- 1 Si
- 0 No
- 7 No Sabe
- 8 Se rehúsa a contestar

Q602. ¿Alguna vez [Response to Q408] ha vivido en la calle, en un albergue, en un hotel, temporalmente con amigos/familiares, en un carro, o en una casa deshabitada?

- 1 Si
- 0 No
- 7 No Sabe
- 8 Se rehúsa a contestar

Q603. ¿Dónde vive [Response to Q408] actualmente? (Elija Uno)

- 1 Condado de San Diego
- 2 Tijuana
- 3 Otro (especifica)
- 7 No Sabe
- 8 Se rehúsa a contestar

*If Q603 is equal to 3 then skip to Q604*

*If not, then skip to instruction before Q605.*

Q604. Por favor especifica donde vive [Response to Q408].

-----

*If Q603 is equal to 1 and Q590 is not equal to 9 and Q590 is not equal to 97 and Q590 is not equal to 98 then skip to Q605*

*If not, then skip to instruction before Q606.*

Q605. **En los últimos 6 meses**, ¿ha viajado [Response to Q408] a México para comprar u conseguir drogas?

- 1 Si
- 0 No
- 7 No Sabe
- 8 Se rehúsa a contestar

*If Q605 is equal to 1 then skip to Q606*

*If not, then skip to instruction before Q607.*

Q606. ¿Cuál de los siguientes tipos de drogas compró [Response to Q408] en México? (Marque Todas las que Correspondan)

- Mariguana
- Heroína
- Cocaína crack sola
- Cocaína en polvo sola
- Heroína y cocaína juntas (speedball)
- Metanfetaminas/cristal solo
- Metanfetaminas/cristal y heroína juntas
- China White sola
- China White y heroína juntas
- China White y metanfetaminas/cristal juntas
- PCP
- Alucinógenos como acido, LSD, peyote, mescalina, hongos
- Inhalantes (por ejemplo, pegamento, gasolina, diluyente de pintura, agua celeste u otros químicos)
- Tranquilizantes sin prescripción (Rivotril, Diazepam, Valium, Ativan o Restoril)
- Oxycontin sin prescripción
- Otros opioides de prescripción sin prescripción (Vicodin, Darvon, Percocet)
- Barbituricos sin prescripción (Amytal, Nembutal y Seconal)
- Otro tipo de droga o combinación que no ha sido mencionada
- No Sabe
- Se rehúsa a contestar

***If Q606R is equal to 1 then skip to Q607***

***If not, then skip to instruction before Q608.***

Q607. Por favor especifica qué tipo de drogas compró [Response to Q408] en México.

-----

*If Q603 is equal to 1 then skip to Q608*

*If not, then skip to instruction before Q609.*

Q608. **En los últimos 6 meses**, ¿ha viajado [Response to Q408] a México para pagar por sexo con dinero o drogas?

- |   |                       |
|---|-----------------------|
| 1 | Si                    |
| 0 | No                    |
| 7 | No Sabe               |
| 8 | Se rehúsa a contestar |

*If Q603 is equal to 2 and Q590 is not equal to 9 and Q590 is not equal to 97 and Q590 is not equal to 98 then skip to Q609*

*If not, then skip to instruction before Q610.*

Q609. **En los últimos 6 meses**, ¿ha viajado [Response to Q408] a Estados Unidos para comprar u conseguir drogas?

- |   |                       |
|---|-----------------------|
| 1 | Si                    |
| 0 | No                    |
| 7 | No Sabe               |
| 8 | Se rehúsa a contestar |

*If Q609 is equal to 1 then skip to Q610*

*If not, then skip to instruction before Q611.*

Q610. ¿Cuál de los siguientes tipos de drogas compró [Response to Q408] en Estados Unidos?  
(Marque Todas las que Correspondan)

- Mariguana
- Heroína
- Cocaína crack sola
- Cocaína en polvo sola
- Heroína y cocaína juntas (speedball)
- Metanfetaminas/cristal solo
- Metanfetaminas/cristal y heroína juntas
- China White sola
- China White y heroína juntas
- China White y metanfetaminas/cristal juntas
- PCP
- Alucinógenos como ácido, LSD, peyote, mescalina, hongos
- Inhalantes (por ejemplo, pegamento, gasolina, diluyente de pintura, agua celeste u otros químicos)
- Tranquilizantes sin prescripción (Rivotril, Diazepam, Valium, Ativan o Restoril)
- Oxycontin sin prescripción
- Otros opioides de prescripción sin prescripción (Vicodin, Darvon, Percocet)
- Barbitúricos sin prescripción (Amytal, Nembutal y Seconal)
- Otro tipo de droga o combinación que no ha sido mencionada
- No Sabe
- Se rehúsa a contestar

***If Q610R is equal to 1 then skip to Q611***

***If not, then skip to instruction before Q612.***

Q611. Por favor especifica qué tipo de drogas compró [Response to Q408] en Estados Unidos.

-----  
*If Q603 is equal to 2 then skip to Q612*

*If not, then skip to Q613.*

Q612. **En los últimos 6 meses**, ¿[Response to Q408] ha tenido sexo por dinero o drogas con alguien de los Estados Unidos?

- 1 Si
- 0 No
- 7 No Sabe
- 8 Se rehúsa a contestar

Q613. ¿Alguna vez [Response to Q408] ha sido detenido o arrestado?

- 1 Si
- 0 No
- 7 No Sabe
- 8 Se rehúsa a contestar

*If Q405 is greater than 2 and Q410 is not equal to "Se rehúsa a contestar" and Q410 is not equal to "Saltó" then skip to Q614*

*If not, then skip to instruction before Q638.*

Q614. ¿Qué tan seguido usa drogas [Response to Q410]? (Elija Uno)

- 01 Todos los días
- 02 Varias veces a la semana
- 03 Una vez a la semana
- 04 Una vez cada dos semanas
- 05 Una vez al mes
- 06 Algunas veces al año
- 07 Una vez al año
- 08 Menos de una vez al año
- 09 Nunca
- 10 Usaba drogas anteriormente pero no en el presente
- 97 No Sabe
- 98 Se rehúsa a contestar

*If Q614 is not less than 1 and Q614 is not greater than 8 then skip to Q615*

*If not, then skip to instruction before Q616.*

Q615. ¿Cuál de las siguientes drogas usa [Response to Q410]? (Marque Todas las que Correspondan)

- Alcohol
- Marihuana
- Heroína sola
- Cocaína crack sola
- Cocaína en polvo sola
- Heroína y cocaína juntas (speedball)
- Metanfetaminas/cristal solo
- Metanfetaminas/cristal y heroína juntas
- China White sola
- China White y heroína juntas
- China White y metanfetaminas/cristal juntas
- PCP
- Alucinógenos como ácido, LSD, peyote, mescalina, hongos
- Inhalantes (por ejemplo, pegamento, gasolina, diluyente de pintura, agua celeste u otros químicos)
- Tranquilizantes sin prescripción (Rivotril, Diazepam, Valium, Ativan o Restoril)
- Oxycontin sin prescripción
- Otros opioides de prescripción sin prescripción (Vicodin, Darvon, Percocet)
- Barbitúricos sin prescripción (Amytal, Nembutal y Seconal)
- Otro tipo de droga o combinación que no ha sido mencionada
- No Sabe
- Se rehúsa a contestar

***If Q615S is equal to 1 then skip to Q616***



*If not, then skip to instruction before Q617.*

Q616. Otra droga o combinación de drogas [especifica]

---

*If Q614 is not less than 1 and Q614 is not greater than 8 then skip to Q617*

*If not, then skip to instruction before Q618.*

Q617. Usa ¿[Response to Q410] drogas inyectadas, o no inyectadas, o a veces las usa de una manera y a veces de la otra? (Elija Uno)

- |   |                                |
|---|--------------------------------|
| 1 | Solo usa drogas inyectadas     |
| 2 | Solo usa drogas no inyectadas  |
| 3 | A veces usa drogas inyectables |
| 7 | No Sabe                        |
| 8 | Se rehúsa a contestar          |

*If Q617 is equal to 1 or Q617 is equal to 3 then skip to Q618*

*If not, then skip to instruction before Q619.*

Q618. ¿Alguna vez has usado la jeringa, agua, cacharro o algodón que ya había sido usada por [Response to Q410]?

- |   |                       |
|---|-----------------------|
| 1 | Si                    |
| 0 | No                    |
| 8 | Se rehúsa a contestar |

*If Q614 is not equal to 9 and Q614 is not equal to 97 and Q614 is not equal to 98 then skip to Q619*

*If not, then skip to instruction before Q620.*

Q619. ¿Alguna vez te ha ofrecido o animado a usar drogas [Response to Q410]?

- |   |                       |
|---|-----------------------|
| 1 | Si                    |
| 0 | No                    |
| 8 | Se rehúsa a contestar |

*If Q619 is equal to 1 then skip to Q620*

*If not, then skip to instruction before Q621.*

Q620. ¿Cuál de las siguientes drogas te ha ofrecido o animado a usar [Response to Q410]? (Marque Todas las que Correspondan)

- Alcohol
- Marihuana
- Heroína sola
- Cocaína crack sola
- Cocaína en polvo sola
- Heroína y cocaína juntas (speedball)
- Metanfetaminas/cristal solo
- Metanfetaminas/cristal y heroína juntas
- China White sola
- China White y heroína juntas
- China White y metanfetaminas/cristal juntas
- PCP
- Alucinógenos como ácido, LSD, peyote, mescalina, hongos
- Inhalantes (por ejemplo, pegamento, gasolina, diluyente de pintura, agua celeste u otros químicos)
- Tranquilizantes sin prescripción (Rivotril, Diazepam, Valium, Ativan o Restoril)
- Oxycontin sin prescripción
- Otros opioides de prescripción sin prescripción (Vicodin, Darvon, Percocet)
- Barbitúricos sin prescripción (Amytal, Nembutal y Seconal)
- Otro tipo de droga o combinación que no ha sido mencionada
- Se rehúsa a contestar

***If Q620S is equal to 1 then skip to Q621***

***If not, then skip to Q622.***

Q621. Otra droga o combinación de drogas [especifica]

-----

Q622. ¿Alguna vez [Response to Q410] te ha animado a dejar de usar drogas?

- 1 Si
- 0 No
- 8 Se rehúsa a contestar

*If Q622 is equal to 1 then skip to Q623*

*If not, then skip to instruction before Q624.*

Q623. ¿Alguna vez [Response to Q410] te ha animado a dejar de usar drogas inyectables específicamente?

- 1 Si
- 0 No
- 7 No Sabe
- 8 Se rehúsa a contestar

*If Q614 is not equal to 9 and Q614 is not equal to 97 and Q614 is not equal to 98 then skip to Q624*

*If not, then skip to instruction before Q625.*

Q624. ¿Qué edad tenía [Response to Q410] cuando empezó a usar drogas por primera vez?

- —
- 97 No Sabe
  - 98 Se rehúsa a contestar

*If Q614 is not equal to 9 and Q614 is not equal to 10 and Q614 is not equal to 97 and Q614 is not equal to 98 then skip to Q625*

*If not, then skip to Q626.*

Q625. Considera el uso diario de drogas de [Response to Q410], ¿Alguna vez en su vida ha usado [Response to Q410] el doble de la dosis de droga o la ha mezclado con otra droga?

- 1 Si
- 0 No
- 7 No Sabe
- 8 Se rehúsa a contestar

Q626. ¿Alguna vez [Response to Q410] ha vivido en la calle, en un albergue, en un hotel, temporalmente con amigos/familiares, en un carro, o en una casa deshabitada?

- 1 Si
- 0 No
- 7 No Sabe
- 8 Se rehúsa a contestar

Q627. ¿Dónde vive [Response to Q410] actualmente? (Elija Uno)

- 1 Condado de San Diego
- 2 Tijuana
- 3 Otro (especifica)
- 7 No Sabe
- 8 Se rehúsa a contestar

*If Q627 is equal to 3 then skip to Q628*

*If not, then skip to instruction before Q629.*

Q628. Por favor especifica dónde vive [Response to Q410].

---

*If Q627 is equal to 1 and Q614 is not equal to 9 and Q614 is not equal to 97 and Q614 is not equal to 98 then skip to Q629*

*If not, then skip to instruction before Q630.*

Q629. **En los últimos 6 meses**, ¿ha viajado [Response to Q410] a México para comprar u conseguir drogas?

- 1 Si
- 0 No
- 7 No Sabe
- 8 Se rehúsa a contestar

*If Q629 is equal to 1 then skip to Q630*

*If not, then skip to instruction before Q631.*

Q630. ¿Cuál de los siguientes tipos de drogas compró [Response to Q410] en México? (Marque Todas las que Correspondan)

- Mariguana
- Heroína
- Cocaína crack sola
- Cocaína en polvo sola
- Heroína y cocaína juntas (speedball)
- Metanfetaminas/cristal solo
- Metanfetaminas/cristal y heroína juntas
- China White sola
- China White y heroína juntas
- China White y metanfetaminas/cristal juntas
- PCP
- Alucinógenos como ácido, LSD, peyote, mescalina, hongos
- Inhalantes (por ejemplo, pegamento, gasolina, diluyente de pintura, agua celeste u otros químicos)
- Tranquilizantes sin prescripción (Rivotril, Diazepam, Valium, Ativan o Restoril)
- Oxycontin sin prescripción
- Otros opioides de prescripción sin prescripción (Vicodin, Darvon, Percocet)
- Barbitúricos sin prescripción (Amytal, Nembutal y Seconal)
- Otro tipo de droga o combinación que no ha sido mencionada
- No Sabe
- Se rehúsa a contestar

***If Q630R is equal to 1 then skip to Q631***

***If not, then skip to instruction before Q632.***

Q631. Por favor especifica qué tipo de drogas compró [Response to Q410] en México.

-----

*If Q627 is equal to 1 then skip to Q632*

*If not, then skip to instruction before Q633.*

Q632. **En los últimos 6 meses**, ¿ha viajado [Response to Q410] a México para pagar con dinero o drogas por sexo?

- |   |                       |
|---|-----------------------|
| 1 | Si                    |
| 0 | No                    |
| 7 | No Sabe               |
| 8 | Se rehúsa a contestar |

*If Q627 is equal to 2 and Q614 is not equal to 9 and Q614 is not equal to 97 and Q614 is not equal to 98 then skip to Q633*

*If not, then skip to instruction before Q634.*

Q633. **En los últimos 6 meses**, ¿ha viajado [Response to Q410] a Estados Unidos para comprar u conseguir drogas?

- |   |                       |
|---|-----------------------|
| 1 | Si                    |
| 0 | No                    |
| 7 | No Sabe               |
| 8 | Se rehúsa a contestar |

*If Q633 is equal to 1 then skip to Q634*

*If not, then skip to instruction before Q635.*



Q634. ¿Cuál de los siguientes tipos de drogas compró [Response to Q410] en Estados Unidos?  
(Marque Todas las que Correspondan)

- Mariguana
- Heroína
- Cocaína crack sola
- Cocaína en polvo sola
- Heroína y cocaína juntas (speedball)
- Metanfetaminas/cristal solo
- Metanfetaminas/cristal y heroína juntas
- China White sola
- China White y heroína juntas
- China White y metanfetaminas/cristal juntas
- PCP
- Alucinógenos como acido, LSD, peyote, mescalina, hongos
- Inhalantes (por ejemplo, pegamento, gasolina, diluyente de pintura, agua celeste u otros químicos)
- Tranquilizantes sin prescripción (Rivotril, Diazepam, Valium, Ativan o Restoril)
- Oxycontin sin prescripción
- Otros opioides de prescripción sin prescripción (Vicodin, Darvon, Percocet)
- Barbituricos sin prescripción (Amytal, Nembutal y Seconal)
- Otro tipo de droga o combinación que no ha sido mencionada
- No Sabe
- Se rehúsa a contestar

***If Q634R is equal to 1 then skip to Q635***

***If not, then skip to instruction before Q636.***

Q635. Por favor especifica qué tipo de drogas compró [Response to Q410] en Estados Unidos.

-----  
*If Q627 is equal to 2 then skip to Q636*

*If not, then skip to Q637.*

Q636. **En los últimos 6 meses**, ¿[Response to Q410] ha tenido sexo por dinero o drogas con alguien de los Estados Unidos?

- 1 Si
- 0 No
- 7 No Sabe
- 8 Se rehúsa a contestar

Q637. ¿Alguna vez [Response to Q410] ha sido detenido o arrestado?

- 1 Si
- 0 No
- 7 No Sabe
- 8 Se rehúsa a contestar

*If Q405 is greater than 3 and Q412 is not equal to "Se rehúsa a contestar" and Q412 is not equal to "Saltó" then skip to Q638*

*If not, then skip to instruction before Q662.*

Q638. ¿Qué tan seguido usa drogas [Response to Q412]? (Elija Uno)

- 01 Todos los días
- 02 Varias veces a la semana
- 03 Una vez a la semana
- 04 Una vez cada dos semanas
- 05 Una vez al mes
- 06 Algunas veces al año
- 07 Una vez al año
- 08 Menos de una vez al año
- 09 Nunca
- 10 Usaba drogas anteriormente pero no en el presente
- 97 No Sabe
- 98 Se rehúsa a contestar

*If Q638 is not less than 1 and Q638 is not greater than 8 then skip to Q639*

*If not, then skip to instruction before Q640.*

Q639. ¿Cuál de las siguientes drogas usa [Response to Q412]? (Marque Todas las que Correspondan)

- Alcohol
- Marihuana
- Heroína sola
- Cocaína crack sola
- Cocaína en polvo sola
- Heroína y cocaína juntas (speedball)
- Metanfetaminas/cristal solo
- Metanfetaminas/cristal y heroína juntas
- China White sola
- China White y heroína juntas
- China White y metanfetaminas/cristal juntas
- PCP
- Alucinógenos como ácido, LSD, peyote, mescalina, hongos
- Inhalantes (por ejemplo, pegamento, gasolina, diluyente de pintura, agua celeste u otros químicos)
- Tranquilizantes sin prescripción (Rivotril, Diazepam, Valium, Ativan o Restoril)
- Oxycontin sin prescripción
- Otros opioides de prescripción sin prescripción (Vicodin, Darvon, Percocet)
- Barbitúricos sin prescripción (Amytal, Nembutal y Seconal)
- Otro tipo de droga o combinación que no ha sido mencionada
- No Sabe
- Se rehúsa a contestar

***If Q639S is equal to 1 then skip to Q640***

*If not, then skip to instruction before Q641.*

Q640. Otra droga o combinación de drogas [especifica]

---

*If Q638 is not less than 1 and Q638 is not greater than 8 then skip to Q641*

*If not, then skip to instruction before Q642.*

Q641. Usa ¿[Response to Q412] drogas inyectadas, o no inyectadas, o a veces las usa de una manera y a veces de la otra? (Elija Uno)

- |   |                                |
|---|--------------------------------|
| 1 | Solo usa drogas inyectadas     |
| 2 | Solo usa drogas no inyectadas  |
| 3 | A veces usa drogas inyectables |
| 7 | No Sabe                        |
| 8 | Se rehúsa a contestar          |

*If Q641 is equal to 1 or Q641 is equal to 3 then skip to Q642*

*If not, then skip to instruction before Q643.*

Q642. ¿Alguna vez has usado la jeringa, agua, cacharro o algodón que ya había sido usada por [Response to Q412]?

- |   |                       |
|---|-----------------------|
| 1 | Si                    |
| 0 | No                    |
| 8 | Se rehúsa a contestar |

*If Q638 is not equal to 9 and Q638 is not equal to 97 and Q638 is not equal to 98 then skip to Q643*

*If not, then skip to instruction before Q644.*

Q643. ¿Alguna vez te ha ofrecido o animado a usar drogas [Response to Q412]?

- |   |                       |
|---|-----------------------|
| 1 | Si                    |
| 0 | No                    |
| 8 | Se rehúsa a contestar |

*If Q643 is equal to 1 then skip to Q644*

*If not, then skip to instruction before Q645.*

Q644. ¿Cuál de las siguientes drogas te ha ofrecido o animado a usar [Response to Q412]? (Marque Todas las que Correspondan)

- Alcohol
- Marihuana
- Heroína sola
- Cocaína crack sola
- Cocaína en polvo sola
- Heroína y cocaína juntas (speedball)
- Metanfetaminas/cristal solo
- Metanfetaminas/cristal y heroína juntas
- China White sola
- China White y heroína juntas
- China White y metanfetaminas/cristal juntas
- PCP
- Alucinógenos como ácido, LSD, peyote, mescalina, hongos
- Inhalantes (por ejemplo, pegamento, gasolina, diluyente de pintura, agua celeste u otros químicos)
- Tranquilizantes sin prescripción (Rivotril, Diazepam, Valium, Ativan o Restoril)
- Oxycontin sin prescripción
- Otros opioides de prescripción sin prescripción (Vicodin, Darvon, Percocet)
- Barbitúricos sin prescripción (Amytal, Nembutal y Seconal)
- Otro tipo de droga o combinación que no ha sido mencionada
- Se rehúsa a contestar

***If Q644S is equal to 1 then skip to Q645***

***If not, then skip to Q646.***

Q645. Otra droga o combinación de drogas [especifica].

-----

Q646. ¿Alguna vez [Response to Q412] te ha animado a dejar de usar drogas?

- 1 Si
- 0 No
- 8 Se rehúsa a contestar

*If Q646 is equal to 1 then skip to Q647*

*If not, then skip to instruction before Q648.*

Q647. ¿Alguna vez [Response to Q412] te ha animado a dejar de usar drogas inyectables específicamente?

- 1 Si
- 0 No
- 7 No Sabe
- 8 Se rehúsa a contestar

*If Q638 is not equal to 9 and Q638 is not equal to 97 and Q638 is not equal to 98 then skip to Q648*

*If not, then skip to instruction before Q649.*

Q648. ¿Qué edad tenía [Response to Q412] cuando empezó a usar drogas por primera vez?

- 
- 97 No Sabe
- 98 Se rehúsa a contestar

*If Q638 is not equal to 9 and Q638 is not equal to 10 and Q638 is not equal to 97 and Q638 is not equal to 98 then skip to Q649*

*If not, then skip to Q650.*



Q649. Considera el uso diario de drogas de [Response to Q412], ¿Alguna vez en su vida ha usado [Response to Q412] el doble de la dosis de droga o la ha mezclado con otra droga?

- 1 Si
- 0 No
- 7 No Sabe
- 8 Se rehúsa a contestar

Q650. ¿Alguna vez [Response to Q412] ha vivido en la calle, en un albergue, en un hotel, temporalmente con amigos/familiares, en un carro, o en una casa deshabitada?

- 1 Si
- 0 No
- 7 No Sabe
- 8 Se rehúsa a contestar

Q651. ¿Dónde vive [Response to Q412] actualmente? (Elija Uno)

- 1 Condado de San Diego
- 2 Tijuana
- 3 Otro (especifica)
- 7 No Sabe
- 8 Se rehúsa a contestar

*If Q651 is equal to 3 then skip to Q652*

*If not, then skip to instruction before Q653.*

Q652. Por favor especifica donde vive [Response to Q412].

-----

*If Q651 is equal to 1 and Q638 is not equal to 9 and Q638 is not equal to 97 and Q638 is not equal to 98 then skip to Q653*

*If not, then skip to instruction before Q654.*

Q653. **En los últimos 6 meses**, ¿ha viajado [Response to Q412] a México para comprar u conseguir drogas?

- |   |                       |
|---|-----------------------|
| 1 | Si                    |
| 0 | No                    |
| 7 | No Sabe               |
| 8 | Se rehúsa a contestar |

*If Q653 is equal to 1 then skip to Q654*

*If not, then skip to instruction before Q655.*

Q654. ¿Cuál de los siguientes tipos de drogas compró [Response to Q412] en México? (Marque Todas las que Correspondan)

- Mariguana
- Heroína
- Cocaína crack sola
- Cocaína en polvo sola
- Heroína y cocaína juntas (speedball)
- Metanfetaminas/cristal solo
- Metanfetaminas/cristal y heroína juntas
- China White sola
- China White y heroína juntas
- China White y metanfetaminas/cristal juntas
- PCP
- Alucinógenos como ácido, LSD, peyote, mescalina, hongos
- Inhalantes (por ejemplo, pegamento, gasolina, diluyente de pintura, agua celeste u otros químicos)
- Tranquilizantes sin prescripción (Rivotril, Diazepam, Valium, Ativan o Restoril)
- Oxycontin sin prescripción
- Otros opioides de prescripción sin prescripción (Vicodin, Darvon, Percocet)
- Barbitúricos sin prescripción (Amytal, Nembutal y Seconal)
- Otro tipo de droga o combinación que no ha sido mencionada
- No Sabe
- Se rehúsa a contestar

***If Q654R is equal to 1 then skip to Q655***

***If not, then skip to instruction before Q656.***

Q655. Por favor especifica qué tipo de drogas compro [Response to Q412] en México.

-----

*If Q651 is equal to 1 then skip to Q656*

*If not, then skip to instruction before Q657.*

Q656. **En los últimos 6 meses**, ¿ha viajado [Response to Q412] a México para pagar por sexo con dinero o drogas?

- |   |                       |
|---|-----------------------|
| 1 | Si                    |
| 0 | No                    |
| 7 | No Sabe               |
| 8 | Se rehúsa a contestar |

*If Q651 is equal to 2 and Q638 is not equal to 9 and Q638 is not equal to 97 and Q638 is not equal to 98 then skip to Q657*

*If not, then skip to instruction before Q658.*

Q657. **En los últimos 6 meses**, ¿ha viajado [Response to Q412] a Estados Unidos para comprar o conseguir drogas?

- |   |                       |
|---|-----------------------|
| 1 | Si                    |
| 0 | No                    |
| 7 | No Sabe               |
| 8 | Se rehúsa a contestar |

*If Q657 is equal to 1 then skip to Q658*

*If not, then skip to instruction before Q659.*

Q658. ¿Cuál de los siguientes tipos de drogas compró [Response to Q412] en Estados Unidos?  
(Marque Todas las que Correspondan)

- Mariguana
- Heroína
- Cocaína crack sola
- Cocaína en polvo sola
- Heroína y cocaína juntas (speedball)
- Metanfetaminas/cristal solo
- Metanfetaminas/cristal y heroína juntas
- China White sola
- China White y heroína juntas
- China White y metanfetaminas/cristal juntas
- PCP
- Alucinógenos como acido, LSD, peyote, mescalina, hongos
- Inhalantes (por ejemplo, pegamento, gasolina, diluyente de pintura, agua celeste u otros químicos)
- Tranquilizantes sin prescripción (Rivotril, Diazepam, Valium, Ativan o Restoril)
- Oxycontin sin prescripción
- Otros opioides de prescripción sin prescripción (Vicodin, Darvon, Percocet)
- Barbituricos sin prescripción (Amytal, Nembutal y Seconal)
- Otro tipo de droga o combinación que no ha sido mencionada
- No Sabe
- Se rehúsa a contestar

***If Q658R is equal to 1 then skip to Q659***

***If not, then skip to instruction before Q660.***

Q659. Por favor especifica qué tipo de drogas compro [Response to Q412] en Estados Unidos.

-----  
*If Q651 is equal to 2 then skip to Q660*

*If not, then skip to Q661.*

Q660. **En los últimos 6 meses**, ¿[Response to Q412] ha tenido sexo por dinero o drogas con alguien de los Estados Unidos?

- 1 Si
- 0 No
- 7 No Sabe
- 8 Se rehúsa a contestar

Q661. ¿Alguna vez [Response to Q412] ha sido detenido o arrestado?

- 1 Si
- 0 No
- 7 No Sabe
- 8 Se rehúsa a contestar

*If Q405 is greater than 4 and Q414 is not equal to "Se rehúsa a contestar" and Q414 is not equal to "Saltó" then skip to Q662*

*If not, then skip to instruction before Q686.*

Q662. ¿Qué tan seguido usa drogas [Response to Q414]? (Elija Uno)

- 01 Todos los días
- 02 Varias veces a la semana
- 03 Una vez a la semana
- 04 Una vez cada dos semanas
- 05 Una vez al mes
- 06 Algunas veces al año
- 07 Una vez al año
- 08 Menos de una vez al año
- 09 Nunca
- 10 Usaba drogas anteriormente pero no en el presente
- 97 No Sabe
- 98 Se rehúsa a contestar

*If Q662 is not less than 1 and Q662 is not greater than 8 then skip to Q663*

*If not, then skip to instruction before Q664.*

Q663. ¿Cuál de las siguientes drogas usa [Response to Q414]? (Marque Todas las que Correspondan)

- Alcohol
- Marihuana
- Heroína sola
- Cocaína crack sola
- Cocaína en polvo sola
- Heroína y cocaína juntas (speedball)
- Metanfetaminas/cristal solo
- Metanfetaminas/cristal y heroína juntas
- China White sola
- China White y heroína juntas
- China White y metanfetaminas/cristal juntas
- PCP
- Alucinógenos como ácido, LSD, peyote, mescalina, hongos
- Inhalantes (por ejemplo, pegamento, gasolina, diluyente de pintura, agua celeste u otros químicos)
- Tranquilizantes sin prescripción (Rivotril, Diazepam, Valium, Ativan o Restoril)
- Oxycontin sin prescripción
- Otros opioides de prescripción sin prescripción (Vicodin, Darvon, Percocet)
- Barbitúricos sin prescripción (Amytal, Nembutal y Seconal)
- Otro tipo de droga o combinación que no ha sido mencionada
- No Sabe
- Se rehúsa a contestar

***If Q663S is equal to 1 then skip to Q664***



*If not, then skip to instruction before Q665.*

Q664. Otra droga o combinación de drogas [especifica]

---

*If Q662 is not less than 1 and Q662 is not greater than 8 then skip to Q665*

*If not, then skip to instruction before Q666.*

Q665. ¿Usa [Response to Q414] drogas inyectadas, o no inyectadas, o a veces las usa de una manera y a veces de la otra? (Elija Uno)

- |   |                                |
|---|--------------------------------|
| 1 | Solo usa drogas inyectadas     |
| 2 | Solo usa drogas no inyectadas  |
| 3 | A veces usa drogas inyectables |
| 7 | No Sabe                        |
| 8 | Se rehúsa a contestar          |

*If Q665 is equal to 1 or Q665 is equal to 3 then skip to Q666*

*If not, then skip to instruction before Q667.*

Q666. ¿Alguna vez has usado la jeringa, agua, cacharro o algodón que ya había sido usada por [Response to Q414]?

- |   |                       |
|---|-----------------------|
| 1 | Si                    |
| 0 | No                    |
| 8 | Se rehúsa a contestar |

*If Q662 is not equal to 9 and Q662 is not equal to 97 and Q662 is not equal to 98 then skip to Q667*

*If not, then skip to instruction before Q668.*

Q667. ¿Alguna vez te ha ofrecido o animado a usar drogas [Response to Q414]?

- |   |                       |
|---|-----------------------|
| 1 | Si                    |
| 0 | No                    |
| 8 | Se rehúsa a contestar |

*If Q667 is equal to 1 then skip to Q668*

*If not, then skip to instruction before Q669.*

Q668. ¿Cuál de las siguientes drogas te ha ofrecido o animado a usar [Response to Q414]? (Marque Todas las que Correspondan)

- Alcohol
- Marihuana
- Heroína sola
- Cocaína crack sola
- Cocaína en polvo sola
- Heroína y cocaína juntas (speedball)
- Metanfetaminas/cristal solo
- Metanfetaminas/cristal y heroína juntas
- China White sola
- China White y heroína juntas
- China White y metanfetaminas/cristal juntas
- PCP
- Alucinógenos como ácido, LSD, peyote, mescalina, hongos
- Inhalantes (por ejemplo, pegamento, gasolina, diluyente de pintura, agua celeste u otros químicos)
- Tranquilizantes sin prescripción (Rivotril, Diazepam, Valium, Ativan o Restoril)
- Oxycontin sin prescripción
- Otros opioides de prescripción sin prescripción (Vicodin, Darvon, Percocet)
- Barbitúricos sin prescripción (Amytal, Nembutal y Seconal)
- Otro tipo de droga o combinación que no ha sido mencionada
- Se rehúsa a contestar

***If Q668S is equal to 1 then skip to Q669***

***If not, then skip to Q670.***

Q669. Otra droga o combinación de drogas [especifica]

-----

Q670. ¿Alguna vez [Response to Q414] te ha animado a dejar de usar drogas?

- 1 Si
- 0 No
- 8 Se rehúsa a contestar

*If Q670 is equal to 1 then skip to Q671*

*If not, then skip to instruction before Q672.*

Q671. ¿Alguna vez [Response to Q414] te ha animado a dejar de usar drogas inyectables específicamente?

- 1 Si
- 0 No
- 7 No Sabe
- 8 Se rehúsa a contestar

*If Q662 is not equal to 9 and Q662 is not equal to 97 and Q662 is not equal to 98 then skip to Q672*

*If not, then skip to instruction before Q673.*

Q672. ¿Qué edad tenía [Response to Q414] cuando empezó a usar drogas por primera vez?

- —
- 97 No Sabe
  - 98 Se rehúsa a contestar

*If Q662 is not equal to 9 and Q662 is not equal to 10 and Q662 is not equal to 97 and Q662 is not equal to 98 then skip to Q673*

*If not, then skip to Q674.*

Q673. Considera el uso diario de drogas de [Response to Q414], ¿Alguna vez en su vida ha usado [Response to Q414] el doble de la dosis de droga o la ha mezclado con otra droga?

- 1 Si
- 0 No
- 7 No Sabe
- 8 Se rehúsa a contestar

Q674. ¿Alguna vez [Response to Q414] ha vivido en la calle, en un albergue, en un hotel, temporalmente con amigos/familiares, en un carro, o en una casa deshabitada?

- 1 Si
- 0 No
- 7 No Sabe
- 8 Se rehúsa a contestar

Q675. ¿Dónde vive [Response to Q414] actualmente? (Elija Uno)

- 1 Condado de San Diego
- 2 Tijuana
- 3 Otro (specifica)
- 7 No Sabe
- 8 Se rehúsa a contestar

*If Q675 is equal to 3 then skip to Q676*

*If not, then skip to instruction before Q677.*

Q676. Por favor especifica donde vive [Response to Q414].

-----

*If Q675 is equal to 1 and Q662 is not equal to 9 and Q662 is not equal to 97 and Q662 is not equal to 98 then skip to Q677*

*If not, then skip to instruction before Q678.*

Q677. **En los últimos 6 meses**, ¿ha viajado [Response to Q414] a México para comprar u obtener drogas?

- |   |                       |
|---|-----------------------|
| 1 | Si                    |
| 0 | No                    |
| 7 | No Sabe               |
| 8 | Se rehúsa a contestar |

*If Q677 is equal to 1 then skip to Q678*

*If not, then skip to instruction before Q679.*

Q678. ¿Cuál de los siguientes tipos de drogas compró [Response to Q414] en México? (Marque Todas las que Correspondan)

- Mariguana
- Heroína
- Cocaína crack sola
- Cocaína en polvo sola
- Heroína y cocaína juntas (speedball)
- Metanfetaminas/cristal solo
- Metanfetaminas/cristal y heroína juntas
- China White sola
- China White y heroína juntas
- China White y metanfetaminas/cristal juntas
- PCP
- Alucinógenos como acido, LSD, peyote, mescalina, hongos
- Inhalantes (por ejemplo, pegamento, gasolina, diluyente de pintura, agua celeste u otros químicos)
- Tranquilizantes sin prescripción (Rivotril, Diazepam, Valium, Ativan o Restoril)
- Oxycontin sin prescripción
- Otros opioides de prescripción sin prescripción (Vicodin, Darvon, Percocet)
- Barbituricos sin prescripción (Amytal, Nembutal y Seconal)
- Otro tipo de droga o combinación que no ha sido mencionada
- No Sabe
- Se rehúsa a contestar

***If Q678R is equal to 1 then skip to Q679***

***If not, then skip to instruction before Q680.***

Q679. Por favor especifica qué tipo de drogas compró [Response to Q414] en México.

-----

*If Q675 is equal to 1 then skip to Q680*

*If not, then skip to instruction before Q681.*

Q680. **En los últimos 6 meses**, ¿ha viajado [Response to Q414] a México para pagar con dinero o drogas por sexo?

- |   |                       |
|---|-----------------------|
| 1 | Si                    |
| 0 | No                    |
| 7 | No Sabe               |
| 8 | Se rehúsa a contestar |

*If Q675 is equal to 2 and Q662 is not equal to 9 and Q662 is not equal to 97 and Q662 is not equal to 98 then skip to Q681*

*If not, then skip to instruction before Q682.*

Q681. **En los últimos 6 meses**, ¿ha viajado [Response to Q414] a Estados Unidos para comprar o conseguir drogas?

- |   |                       |
|---|-----------------------|
| 1 | Si                    |
| 0 | No                    |
| 7 | No Sabe               |
| 8 | Se rehúsa a contestar |

*If Q681 is equal to 1 then skip to Q682*

*If not, then skip to instruction before Q683.*



Q682. ¿Cuál de los siguientes tipos de drogas compró [Response to Q414] en Estados Unidos?  
(Marque Todas las que Correspondan)

- Mariguana
- Heroína
- Cocaína crack sola
- Cocaína en polvo sola
- Heroína y cocaína juntas (speedball)
- Metanfetaminas/cristal solo
- Metanfetaminas/cristal y heroína juntas
- China White sola
- China White y heroína juntas
- China White y metanfetaminas/cristal juntas
- PCP
- Alucinógenos como acido, LSD, peyote, mescalina, hongos
- Inhalantes (por ejemplo, pegamento, gasolina, diluyente de pintura, agua celeste u otros químicos)
- Tranquilizantes sin prescripción (Rivotril, Diazepam, Valium, Ativan o Restoril)
- Oxycontin sin prescripción
- Otros opioides de prescripción sin prescripción (Vicodin, Darvon, Percocet)
- Barbituricos sin prescripción (Amytal, Nembutal y Seconal)
- Otro tipo de droga o combinación que no ha sido mencionada
- No Sabe
- Se rehúsa a contestar

***If Q682R is equal to 1 then skip to Q683***

***If not, then skip to instruction before Q684.***

Q683. Por favor especifica qué tipo de drogas compró [Response to Q414] en Estados Unidos.

-----

*If Q675 is equal to 2 then skip to Q684*

*If not, then skip to Q685.*

Q684. **En los últimos 6 meses**, ¿[Response to Q414] ha tenido sexo por dinero o drogas con alguien de los Estados Unidos?

- 1 Si
- 0 No
- 7 No Sabe
- 8 Se rehúsa a contestar

Q685. ¿Alguna vez [Response to Q414] ha sido detenido o arrestado?

- 1 Si
- 0 No
- 7 No Sabe
- 8 Se rehúsa a contestar

**COMPONENTE DE REDES SOCIALES DE SARSCoV-2**

**READ: LEA:** *Ahora vamos a cambiar de tema y vamos a hablar más sobre tiempos más recientes en los que has pasado tiempo con otras personas. Como dijimos antes, estamos intentando aprender sobre cómo las personas se conectan unas con l otras y cómo esas conexiones se relacionan para prevenir enfermedades, pero ahora nos vamos a enfocar en la infección SARSCoV-2. El tener nombres e información demográfica nos ayudará a ver cómo las personas en este estudio están conectadas unas a otras, por ejemplo, a través de amigos en común.*

*Por favor recuerda que todo lo que me digas es confidencial y que nosotros protegeremos tu privacidad y la de las personas que tú menciones. Nosotros nunca en ningún momento usaremos esta información para contactar a las personas que nos has mencionado.*

**READ: LEA:** *Por favor piensa sobre los siguientes tipos de personas con las que tú has tenido contacto cercano dentro de los últimos 14 días. Nosotros estamos interesados en las personas con las que has tenido:*

*Contacto no físico (con 2 metros de distancia) que duró más de una hora*

*O*

*Contacto físico*

*Por favor incluye sus nombres (primer nombre, apellido, apodo) en la parte de abajo.*

*Puedes usar tu teléfono para ayudarte a recordar. Esto es importante. Nosotros nunca vamos a compartir los nombres que tú nos darás. Sólo los/as investigadores/as tendrán acceso a estos nombres.*

Q686. Vamos a comenzar con personas en la categoría de **Pareja romántica o sexual o esposo/a** con quien/quienes tú has tenido contacto en los últimos 14 días (nuevamente por contacto cercano, nos referimos a: no contacto físico (dentro de 6 pies de distancia) que haya durado más de 1 hora O contacto físico. ¿Con cuantas personas has tenido contacto? A continuación, vamos a anotar sus nombres (se pueden nombrar hasta 5).

— —

98

Se rehúsa a contestar

*If Q686 is greater than 0 then skip to Q687*

*If not, then skip to instruction before Q691.*

Q687. **Pareja romántica o sexual o esposo/a:** Persona #1 Primer Nombre

-----

Q688. **Pareja romántica o sexual o esposo/a:** Persona #1 Apellido

-----

Q689. Pareja romántica o sexual o esposo/a: Persona #1 Apodo

-----

Q690. Pareja romántica o sexual o esposo/a: Persona #1 Edad\_\_ \_\_

97 No Sabe

98 Se rehúsa a contestar

*If Q686 is greater than 1 then skip to Q691*

*If not, then skip to instruction before Q695.*

Q691. Pareja romántica o sexual o esposo/a: Persona #2 Primer Nombre

-----

Q692. Pareja romántica o sexual o esposo/a: Persona #2 Apellido

-----

Q693. Pareja romántica o sexual o esposo/a: Persona #2 Apodo

-----

Q694. Pareja romántica o sexual o esposo/a: Persona #2 Edad\_\_ \_\_

97 No Sabe

98 Se rehúsa a contestar

*If Q686 is greater than 2 then skip to Q695*

*If not, then skip to instruction before Q699.*

Q695. Pareja romántica o sexual o esposo/a: Persona #3 Primer Nombre

-----

Q696. Pareja romántica o sexual o esposo/a: Persona #3 Apellido

-----

Q697. **Pareja romántica o sexual o esposo/a:** Persona #3 Apodo

-----

Q698. **Pareja romántica o sexual o esposo/a:** Persona #3 Edad\_\_ \_\_

97 No Sabe

98 Se rehúsa a contestar

*If Q686 is greater than 3 then skip to Q699*

*If not, then skip to instruction before Q703.*

Q699. **Pareja romántica o sexual o esposo/a:** Persona #4 Primer Nombre

-----

Q700. **Pareja romántica o sexual o esposo/a:** Persona #4 Apellido

-----

Q701. **Pareja romántica o sexual o esposo/a:** Persona #4 Apodo

-----

Q702. **Pareja romántica o sexual o esposo/a:** Persona #4 Edad\_\_ \_\_

97 No Sabe

98 Se rehúsa a contestar

*If Q686 is greater than 4 then skip to Q703*

*If not, then skip to Q707.*

Q703. **Pareja romántica o sexual o esposo/a:** Persona #5 Primer Nombre

-----

Q704. **Pareja romántica o sexual o esposo/a:** Persona #5 Apellido

-----

Q705. Pareja romántica o sexual o esposo/a: Persona #5 Apodo

-----

Q706. Pareja romántica o sexual o esposo/a: Persona #5 Edad\_\_ \_\_

97 No Sabe

98 Se rehúsa a contestar

Q707. Ahora, por favor piensa en **otros familiares relacionados por vínculo sanguíneo o matrimonio** con quien tú has tenido contacto cercano dentro de los últimos 14 días. ¿Con cuántos de ellos tuviste contacto?

---

98 Se rehúsa a contestar

*If Q707 is greater than 0 then skip to Q708*

*If not, then skip to instruction before Q712.*

Q708. Otros familiares relacionados por sangre o matrimonio: Persona #1 Primer Nombre

-----

Q709. Otros familiares relacionados por sangre o matrimonio: Persona #1 Apellido

-----

Q710. Otros familiares relacionados por sangre o matrimonio: Persona #1 Apodo

-----

Q711. Otros familiares relacionados por sangre o matrimonio: Persona #1 Edad

---

97 No Sabe

98 Se rehúsa a contestar

*If Q707 is greater than 1 then skip to Q712*

*If not, then skip to instruction before Q716.*

Q712. **Otros familiares relacionados por sangre o matrimonio:** Persona #2 Primer Nombre

-----

Q713. **Otros familiares relacionados por sangre o matrimonio:** Persona #2 Apellido

-----

Q714. **Otros familiares relacionados por sangre o matrimonio:** Persona #2 Apodo

-----

Q715. **Otros familiares relacionados por sangre o matrimonio:** Persona #2 Edad

---

97 No Sabe

98 Se rehúsa a contestar

*If Q707 is greater than 2 then skip to Q716*

*If not, then skip to instruction before Q720.*

Q716. **Otros familiares relacionados por sangre o matrimonio:** Persona #3 Primer Nombre

-----

Q717. **Otros familiares relacionados por sangre o matrimonio:** Persona #3 Apellido

-----

Q718. **Otros familiares relacionados por sangre o matrimonio:** Persona #3 Apodo

-----

Q719. **Otros familiares relacionados por sangre o matrimonio:** Persona #3 Edad

---

97 No Sabe

98 Se rehúsa a contestar

*If Q707 is greater than 3 then skip to Q720*

*If not, then skip to instruction before Q724.*

Q720. **Otros familiares relacionados por sangre o matrimonio:** Persona #4 Primer Nombre

-----

Q721. **Otros familiares relacionados por sangre o matrimonio:** Persona #4 Apellido

-----

Q722. **Otros familiares relacionados por sangre o matrimonio:** Persona #4 Apodo

-----

Q723. **Otros familiares relacionados por sangre o matrimonio:** Persona #4 Edad

---

- 97 No Sabe
- 98 Se rehúsa a contestar

*If Q707 is greater than 4 then skip to Q724*

*If not, then skip to Q728.*

Q724. **Otros familiares relacionados por sangre o matrimonio:** Persona #5 Primer Nombre

-----

Q725. **Otros familiares relacionados por sangre o matrimonio:** Persona #5 Apellido

-----

Q726. **Otros familiares relacionados por sangre o matrimonio:** Persona #5 Apodo

-----

Q727. **Otros familiares relacionados por sangre o matrimonio:** Persona #5 Edad

---

- 97 No Sabe
- 98 Se rehúsa a contestar



Q728. Ahora, por favor piensa en **Amigos Cercanos** con quien tú has tenido contacto cercano dentro de los últimos 14 días. ¿Con cuántos de ellos tuviste contacto?

— —

98 Se rehúsa a contestar

*If Q728 is greater than 0 then skip to Q729*

*If not, then skip to instruction before Q733.*

Q729. **Amigos Cercanos:** Persona #1 Primer Nombre

-----

Q730. **Amigos Cercanos:** Persona #1 Apellido

-----

Q731. **Amigos Cercanos:** Persona #1 Apodo

-----

Q732. **Amigos Cercanos:** Persona #1 Edad

— —

97 No Sabe

98 Se rehúsa a contestar

*If Q728 is greater than 1 then skip to Q733*

*If not, then skip to instruction before Q737.*

Q733. **Amigos Cercanos:** Persona #2 Primer Nombre

-----

Q734. **Amigos Cercanos:** Persona #2 Apellido

-----

Q735. **Amigos Cercanos:** Persona #2 Apodo

-----

Q736. **Amigos Cercanos:** Persona #2 Edad

— —

97 No Sabe

98 Se rehúsa a contestar

*If Q728 is greater than 2 then skip to Q737*

*If not, then skip to instruction before Q741.*

Q737. **Amigos Cercanos:** Persona #3 Primer Nombre

-----

Q738. **Amigos Cercanos:** Persona #3 Apellido

-----

Q739. **Amigos Cercanos:** Persona #3 Apodo

-----

Q740. **Amigos Cercanos:** Persona #3 Edad

— —

97 No Sabe

98 Se rehúsa a contestar

*If Q728 is greater than 3 then skip to Q741*

*If not, then skip to instruction before Q745.*

Q741. **Amigos Cercanos:** Persona #4 Primer Nombre

-----

Q742. **Amigos Cercanos:** Persona #4 Apellido

-----

Q743. **Amigos Cercanos:** Persona #4 Apodo

-----

Q744. **Amigos Cercanos:** Persona #4 Edad

— —

97 No Sabe

98 Se rehúsa a contestar

*If Q728 is greater than 4 then skip to Q745*

*If not, then skip to Q749.*

Q745. **Amigos Cercanos:** Persona #5 Primer Nombre

-----

Q746. **Amigos Cercanos:** Persona #5 Apellido

-----

Q747. **Amigos Cercanos:** Persona #5 Apodo

-----

Q748. **Amigos Cercanos:** Persona #5 Edad

— —

97 No Sabe

98 Se rehúsa a contestar

Q749. Ahora, por favor piensa en **Compañeros de cuarto o rumis (e.g. compañeros de casa, de cuarto)** con quien tú has tenido contacto cercano dentro de los últimos 14 días. ¿Con cuántos de ellos tuviste contacto?

— —

98 Se rehúsa a contestar

*If Q749 is greater than 0 then skip to Q750*

*If not, then skip to instruction before Q754.*

Q750. **Compañeros de cuarto (e.g. compañeros de casa, de cuarto):** Persona #1 Primer Nombre

-----

Q751. **Compañeros de cuarto (e.g. compañeros de casa, de cuarto):** Persona #1 Apellido

-----

Q752. **Compañeros de cuarto (e.g. compañeros de casa, de cuarto):** Persona #1 Apodo

-----

Q753. **Compañeros de cuarto (e.g. compañeros de casa, de cuarto):** Persona #1 Edad

---

97 No Sabe

98 Se rehúsa a contestar

*If Q749 is greater than 1 then skip to Q754*

*If not, then skip to instruction before Q758.*

Q754. **Compañeros de cuarto (e.g. compañeros de casa, de cuarto):** Persona #2 Primer Nombre

-----

Q755. **Compañeros de cuarto (e.g. compañeros de casa, de cuarto):** Persona #2 Apellido

-----

Q756. **Compañeros de cuarto (e.g. compañeros de casa, de cuarto):** Persona #2 Apodo

-----

Q757. **Compañeros de cuarto (e.g. compañeros de casa, de cuarto):** Persona #2 Edad

---

97 No Sabe

98 Se rehúsa a contestar

*If Q749 is greater than 2 then skip to Q758*

*If not, then skip to instruction before Q762.*

Q758. **Compañeros de cuarto (e.g. compañeros de casa, de cuarto):** Persona #3 Primer Nombre

-----

Q759. **Compañeros de cuarto (e.g. compañeros de casa, de cuarto):** Persona #3 Apellido

-----

Q760. **Compañeros de cuarto (e.g. compañeros de casa, de cuarto):** Persona #3 Apodo

-----

Q761. **Compañeros de cuarto (e.g. compañeros de casa, de cuarto):** Persona #3 Edad

---

97 No Sabe

98 Se rehúsa a contestar

*If Q749 is greater than 3 then skip to Q762*

*If not, then skip to instruction before Q766.*

Q762. **Compañeros de cuarto (e.g. compañeros de casa, de cuarto):** Persona #4 Primer Nombre

-----

Q763. **Compañeros de cuarto (e.g. compañeros de casa, de cuarto):** Persona #4 Apellido

-----

Q764. **Compañeros de cuarto (e.g. compañeros de casa, de cuarto):** Persona #4 Apodo

-----

Q765. **Compañeros de cuarto (e.g. compañeros de casa, de cuarto):** Persona #4 Edad

---

97 No Sabe

98 Se rehúsa a contestar

*If Q749 is greater than 4 then skip to Q766*

*If not, then skip to Q770.*

Q766. **Compañeros de cuarto (e.g. compañeros de casa, de cuarto):** Persona #5 Primer Nombre

-----

Q767. **Compañeros de cuarto (e.g. compañeros de casa, de cuarto):** Persona #5 Apellido

-----

Q768. **Compañeros de cuarto (e.g. compañeros de casa, de cuarto):** Persona #5 Apodo

-----

Q769. **Compañeros de cuarto (e.g. compañeros de casa, de cuarto):** Persona #5 Edad

---

97 No Sabe

98 Se rehúsa a contestar

Q770. Ahora, por favor piensa en **Vecinos** con quien tú has tenido contacto cercano dentro de los últimos 14 días. ¿Con cuántos de ellos tuviste contacto?

---

98 Se rehúsa a contestar

*If Q770 is greater than 0 then skip to Q771*

*If not, then skip to instruction before Q775.*

Q771. **Vecinos:** Persona #1 Primer Nombre

-----

Q772. **Vecinos:** Persona #1 Apellido

-----

Q773. **Vecinos:** Persona #1 Apodo

-----

Q774. **Vecinos:** Persona #1 Edad

\_\_\_

97 No Sabe

98 Se rehúsa a contestar

*If Q770 is greater than 1 then skip to Q775*

*If not, then skip to instruction before Q779.*

Q775. **Vecinos:** Persona #2 Primer Nombre

-----

Q776. **Vecinos:** Persona #2 Apellido

-----

Q777. **Vecinos:** Persona #2 Apodo

-----

Q778. **Vecinos:** Persona #2 Edad

\_\_\_

97 No Sabe

98 Se rehúsa a contestar

*If Q770 is greater than 2 then skip to Q779*

*If not, then skip to instruction before Q783.*

Q779. **Vecinos:** Persona #3 Primer Nombre

-----

Q780. **Vecinos:** Persona #3 Apellido

-----

Q781. **Vecinos:** Persona #3 Apodo

-----

Q782. **Vecinos:** Persona #3 Edad

97 No Sabe  
98 Se rehúsa a contestar

*If Q770 is greater than 3 then skip to Q783*

*If not, then skip to instruction before Q787.*

Q783. **Vecinos:** Persona #4 Primer Nombre

-----

Q784. **Vecinos:** Persona #4 Apellido

-----

Q785. **Vecinos:** Persona #4 Apodo

-----

Q786. **Vecinos:** Persona #4 Edad

97 No Sabe  
98 Se rehúsa a contestar

*If Q770 is greater than 4 then skip to Q787*

*If not, then skip to Q791.*

Q787. **Vecinos:** Persona #5 Primer Nombre

-----

Q788. **Vecinos:** Persona #5 Apellido

-----



Q789. **Vecinos:** Persona #5 Apodo

-----

Q790. **Vecinos:** Persona #5 Edad

---

97 No Sabe

98 Se rehúsa a contestar

Q791. Ahora, por favor piensa en los **relacionados con el trabajo (compañeros de trabajo, jefes, clientes)**: con quien tú has tenido contacto cercano dentro de los últimos 14 días. ¿Con cuántos de ellos tuviste contacto?

---

98 Se rehúsa a contestar

*If Q791 is greater than 0 then skip to Q792*

*If not, then skip to instruction before Q796.*

Q792. **Relacionado con trabajo (compañeros de trabajo, jefes, clientes):** Persona #1 Primer Nombre

-----

Q793. **Relacionado con trabajo (compañeros de trabajo, jefes, clientes):** Persona #1 Apellido

-----

Q794. **Relacionado con trabajo (compañeros de trabajo, jefes, clientes):** Persona #1 Apodo

-----

Q795. **Relacionado con trabajo (compañeros de trabajo, jefes, clientes):** Persona #1 Edad

---

97 No Sabe

98 Se rehúsa a contestar

*If Q791 is greater than 1 then skip to Q796*

*If not, then skip to instruction before Q800.*

Q796. **Relacionado con trabajo (compañeros de trabajo, jefes, clientes):** Persona #2 Primer Nombre

-----

Q797. **Relacionado con trabajo (compañeros de trabajo, jefes, clientes):** Persona #2 Apellido

-----

Q798. **Relacionado con trabajo (compañeros de trabajo, jefes, clientes):** Persona #2 Apodo

-----

Q799. **Relacionado con trabajo (compañeros de trabajo, jefes, clientes):** Persona #2 Edad

— —

97 No Sabe

98 Se rehúsa a contestar

*If Q791 is greater than 2 then skip to Q800*

*If not, then skip to instruction before Q804.*

Q800. **Relacionado con trabajo (compañeros de trabajo, jefes, clientes):** Persona #3 Primer Nombre

-----

Q801. **Relacionado con trabajo (compañeros de trabajo, jefes, clientes):** Persona #3 Apellido

-----

Q802. **Relacionado con trabajo (compañeros de trabajo, jefes, clientes):** Persona #3 Apodo

-----

Q803. **Relacionado con trabajo (compañeros de trabajo, jefes, clientes):** Persona #3 Edad

— —

97 No Sabe

98 Se rehúsa a contestar

*If Q791 is greater than 3 then skip to Q804*

*If not, then skip to instruction before Q808.*

Q804. **Relacionado con trabajo (compañeros de trabajo, jefes, clientes):** Persona #4 Primer Nombre

-----

Q805. **Relacionado con trabajo (compañeros de trabajo, jefes, clientes):** Persona #4 Apellido

-----

Q806. **Relacionado con trabajo (compañeros de trabajo, jefes, clientes):** Persona #4 Apodo

-----

Q807. **Relacionado con trabajo (compañeros de trabajo, jefes, clientes):** Persona #4 Edad

— —

97 No Sabe

98 Se rehúsa a contestar

*If Q791 is greater than 4 then skip to Q808*

*If not, then skip to Q812.*

Q808. **Relacionado con trabajo (compañeros de trabajo, jefes, clientes):** Persona #5 Primer Nombre

-----

Q809. **Relacionado con trabajo (compañeros de trabajo, jefes, clientes):** Persona #5 Apellido

-----

Q810. **Relacionado con trabajo (compañeros de trabajo, jefes, clientes):** Persona #5 Apodo

-----

Q811. **Relacionado con trabajo (compañeros de trabajo, jefes, clientes):** Persona #5 Edad

---

97 No Sabe

98 Se rehúsa a contestar

Q812. Ahora, por favor piensa en **Compañeros de escuela:** con quien tú has tenido contacto cercano dentro de los últimos 14 días. ¿Con cuántos de ellos tuviste contacto?

---

98 Se rehúsa a contestar

*If Q812 is greater than 0 then skip to Q813*

*If not, then skip to instruction before Q817.*

Q813. **Compañeros de escuela:** Persona #1 Primer Nombre

-----

Q814. **Compañeros de escuela:** Persona #1 Apellido

-----

Q815. **Compañeros de escuela:** Persona #1 Apodo

-----

Q816. **Compañeros de escuela:** Persona #1 Edad

---

97 No Sabe

98 Se rehúsa a contestar

*If Q812 is greater than 1 then skip to Q817*

*If not, then skip to instruction before Q821.*

Q817. **Compañeros de escuela:** Persona #2 Primer Nombre

-----

Q818. **Compañeros de escuela:** Persona #2 Apellido

-----

Q819. **Compañeros de escuela:** Persona #2 Apodo

-----

Q820. **Compañeros de escuela:** Persona #2 Edad

\_\_ \_\_

97 No Sabe

98 Se rehúsa a contestar

*If Q812 is greater than 2 then skip to Q821*

*If not, then skip to instruction before Q825.*

Q821. **Compañeros de escuela:** Persona #3 Primer Nombre

-----

Q822. **Compañeros de escuela:** Persona #3 Apellido

-----

Q823. **Compañeros de escuela:** Persona #3 Apodo

-----

Q824. **Compañeros de escuela:** Persona #3 Edad

\_\_ \_\_

97 No Sabe

98 Se rehúsa a contestar

*If Q812 is greater than 3 then skip to Q825*

*If not, then skip to instruction before Q829.*

Q825. **Compañeros de escuela:** Persona #4 Primer Nombre

-----

Q826. **Compañeros de escuela:** Persona #4 Apellido

-----

Q827. **Compañeros de escuela:** Persona #4 Apodo

-----

Q828. **Compañeros de escuela:** Persona #4 Edad

\_\_ \_\_

97 No Sabe

98 Se rehúsa a contestar

*If Q812 is greater than 4 then skip to Q829*

*If not, then skip to Q833.*

Q829. **Compañeros de escuela:** Persona #5 Primer Nombre

-----

Q830. **Compañeros de escuela:** Persona #5 Apellido

-----

Q831. **Compañeros de escuela:** Persona #5 Apodo

-----

Q832. **Compañeros de escuela:** Persona #5 Edad

\_\_ \_\_

97 No Sabe

98 Se rehúsa a contestar

Q833. Ahora, por favor piensa en los **relacionados con las drogas o el alcohol** con quien tú has tenido contacto cercano dentro de los últimos 14 días. ¿Con cuántos de ellos tuviste contacto?

— —

98 Se rehúsa a contestar

*If Q833 is greater than 0 then skip to Q834*

*If not, then skip to instruction before Q838.*

Q834. **Relacionado con drogas o alcohol:** Persona #1 Primer Nombre

-----

Q835. **Relacionado con drogas o alcohol:** Persona #1 Apellido

-----

Q836. **Relacionado con drogas o alcohol:** Persona #1 Apodo

-----

Q837. **Relacionado con drogas o alcohol:** Persona #1 Edad — —

97 No Sabe

98 Se rehúsa a contestar

*If Q833 is greater than 1 then skip to Q838*

*If not, then skip to instruction before Q842.*

Q838. **Relacionado con drogas o alcohol:** Persona #2 Primer Nombre

-----

Q839. **Relacionado con drogas o alcohol:** Persona #2 Apellido

-----

Q840. **Relacionado con drogas o alcohol:** Persona #2 Apodo

-----

Q841. **Relacionado con drogas o alcohol:** Persona #2 Edad \_\_\_

97 No Sabe

98 Se rehúsa a contestar

*If Q833 is greater than 2 then skip to Q842*

*If not, then skip to instruction before Q846.*

Q842. **Relacionado con drogas o alcohol:** Persona #3 Primer Nombre

-----

Q843. **Relacionado con drogas o alcohol:** Persona #3 Apellido

-----

Q844. **Relacionado con drogas o alcohol:** Persona #3 Apodo

-----

Q845. **Relacionado con drogas o alcohol:** Persona #3 Edad \_\_\_

97 No Sabe

98 Se rehúsa a contestar

*If Q833 is greater than 3 then skip to Q846*

*If not, then skip to instruction before Q850.*

Q846. **Relacionado con drogas o alcohol:** Persona #4 Primer Nombre

-----

Q847. **Relacionado con drogas o alcohol:** Persona #4 Apellido

-----

Q848. **Relacionado con drogas o alcohol:** Persona #4 Apodo

-----



Q849. **Relacionado con drogas o alcohol:** Persona #4 Edad \_\_\_

97 No Sabe

98 Se rehúsa a contestar

*If Q833 is greater than 4 then skip to Q850*

*If not, then skip to Q854.*

Q850. **Relacionado con drogas o alcohol:** Persona #5 Primer Nombre

-----

Q851. **Relacionado con drogas o alcohol:** Persona #5 Apellido

-----

Q852. **Relacionado con drogas o alcohol:** Persona #5 Apodo

-----

Q853. **Relacionado con drogas o alcohol:** Persona #5 Edad \_\_\_

97 No Sabe

98 Se rehúsa a contestar

Q854. Ahora, por favor piensa en **Personas que brindan un servicio** con quien tú has tenido contacto cercano dentro de los últimos 14 días. ¿Con cuántos de ellos tuviste contacto?

\_\_\_

98 Se rehúsa a contestar

*If Q854 is greater than 0 then skip to Q855*

*If not, then skip to instruction before Q859.*

Q855. **Personas que proveen un servicio:** Persona #1 Primer Nombre

-----

Q856. **Personas que proveen un servicio:** Persona #1 Apellido

-----

Q857. **Personas que proveen un servicio:** Persona #1 Apodo

-----

Q858. **Personas que proveen un servicio:** Persona #1 Edad \_\_ \_\_

- 97 No Sabe
- 98 Se rehúsa a contestar

*If Q854 is greater than 1 then skip to Q859*

*If not, then skip to instruction before Q863.*

Q859. **Personas que proveen un servicio:** Persona #2 Primer Nombre

-----

Q860. **Personas que proveen un servicio:** Persona #2 Apellido

-----

Q861. **Personas que proveen un servicio:** Persona #2 Apodo

-----

Q862. **Personas que proveen un servicio:** Persona #2 Edad \_\_ \_\_

- 97 No Sabe
- 98 Se rehúsa a contestar

*If Q854 is greater than 2 then skip to Q863*

*If not, then skip to instruction before Q867.*

Q863. **Personas que proveen un servicio:** Persona #3 Primer Nombre

-----

Q864. **Personas que proveen un servicio:** Persona #3 Apellido

-----

Q865. **Personas que proveen un servicio:** Persona #3 Apodo

-----

Q866. **Personas que proveen un servicio:** Persona #3 Edad \_\_ \_\_

- 97 No Sabe
- 98 Se rehúsa a contestar

*If Q854 is greater than 3 then skip to Q867*

*If not, then skip to instruction before Q871.*

Q867. **Personas que proveen un servicio:** Persona #4 Primer Nombre

-----

Q868. **Personas que proveen un servicio:** Persona #4 Apellido

-----

Q869. **Personas que proveen un servicio:** Persona #4 Apodo

-----

Q870. **Personas que proveen un servicio:** Persona #4 Edad \_\_ \_\_

- 97 No Sabe
- 98 Se rehúsa a contestar

*If Q854 is greater than 4 then skip to Q871*

*If not, then skip to Q875.*

Q871. **Personas que proveen un servicio:** Persona #5 Primer Nombre

-----

Q872. **Personas que proveen un servicio:** Persona #5 Apellido

-----

Q873. **Personas que proveen un servicio:** Persona #5 Apodo

-----

Q874. Edad

\_\_\_

97 No Sabe

98 Se rehúsa a contestar

Q875. Ahora, por favor piensa en **Otros (e.g. personas que viste en grupos comunitarios, servicios religiosos, deportes o clases de ejercicio, escuela, etc.)** con quien tú has tenido contacto cercano dentro de los últimos 14 días. ¿Con cuántos de ellos tuviste contacto?

\_\_\_

98 Se rehúsa a contestar

*If Q875 is greater than 0 then skip to Q876*

*If not, then skip to instruction before Q880.*

Q876. **Otros (e.g. personas que viste en grupos comunitarios, servicios religiosos, deportes o clases de ejercicio, escuela, etc.):** Persona #1 Primer Nombre

-----

Q877. **Otros (e.g. personas que viste en grupos comunitarios, servicios religiosos, deportes o clases de ejercicio, escuela, etc.):** Persona #1 Apellido

-----

Q878. **Otros (e.g. personas que viste en grupos comunitarios, servicios religiosos, deportes o clases de ejercicio, escuela, etc.):** Persona #1 Apodo

-----

Q879. **Otros (e.g. personas que viste en grupos comunitarios, servicios religiosos, deportes o clases de ejercicio, escuela, etc.):** Persona #1 Edad

— —

97 No Sabe

98 Se rehúsa a contestar

*If Q875 is greater than 1 then skip to Q880*

*If not, then skip to instruction before Q884.*

Q880. **Otros (e.g. personas que viste en grupos comunitarios, servicios religiosos, deportes o clases de ejercicio, escuela, etc.):** Persona #2 Primer Nombre

-----

Q881. **Otros (e.g. personas que viste en grupos comunitarios, servicios religiosos, deportes o clases de ejercicio, escuela, etc.):** Persona #2 Apellido

-----

Q882. **Otros (e.g. personas que viste en grupos comunitarios, servicios religiosos, deportes o clases de ejercicio, escuela, etc.):** Persona #2 Apodo

-----

Q883. **Otros (e.g. personas que viste en grupos comunitarios, servicios religiosos, deportes o clases de ejercicio, escuela, etc.):** Persona #2 Edad

— —

97 No Sabe

98 Se rehúsa a contestar

*If Q875 is greater than 2 then skip to Q884*

*If not, then skip to instruction before Q888.*

Q884. **Otros (e.g. personas que viste en grupos comunitarios, servicios religiosos, deportes o clases de ejercicio, escuela, etc.):** Persona #3 Pimer Nombre

-----

Q885. **Otros (e.g. personas que viste en grupos comunitarios, servicios religiosos, deportes o clases de ejercicio, escuela, etc.):** Persona #3 Apellido

-----

Q886. **Otros (e.g. personas que viste en grupos comunitarios, servicios religiosos, deportes o clases de ejercicio, escuela, etc.):** Persona #3 Apodo

-----

Q887. **Otros (e.g. personas que viste en grupos comunitarios, servicios religiosos, deportes o clases de ejercicio, escuela, etc.):** Persona #3 Edad

-----

|    |                       |
|----|-----------------------|
| 97 | No Sabe               |
| 98 | Se rehúsa a contestar |

*If Q875 is greater than 3 then skip to Q888*

*If not, then skip to instruction before Q892.*

Q888. **Otros (e.g. personas que viste en grupos comunitarios, servicios religiosos, deportes o clases de ejercicio, escuela, etc.):** Persona #4 Primer Nombre

-----

Q889. **Otros (e.g. personas que viste en grupos comunitarios, servicios religiosos, deportes o clases de ejercicio, escuela, etc.):** Persona #4 Apellido

-----

Q890. **Otros (e.g. personas que viste en grupos comunitarios, servicios religiosos, deportes o clases de ejercicio, escuela, etc.):** Persona #4 Apodo

-----

Q891. **Otros (e.g. personas que viste en grupos comunitarios, servicios religiosos, deportes o clases de ejercicio, escuela, etc.):** Persona #4 Edad

-----

|    |                       |
|----|-----------------------|
| 97 | No Sabe               |
| 98 | Se rehúsa a contestar |

*If Q875 is greater than 4 then skip to Q892*

*If not, then skip to instruction before Q896.*

Q892. **Otros (e.g. personas que viste en grupos comunitarios, servicios religiosos, deportes o clases de ejercicio, escuela, etc.):** Persona #5 Primer Nombre

-----

Q893. **Otros (e.g. personas que viste en grupos comunitarios, servicios religiosos, deportes o clases de ejercicio, escuela, etc.):** Persona #5 Apellido

-----

Q894. **Otros (e.g. personas que viste en grupos comunitarios, servicios religiosos, deportes o clases de ejercicio, escuela, etc.):** Persona #5 Apodo

-----

Q895. **Otros (e.g. personas que viste en grupos comunitarios, servicios religiosos, deportes o clases de ejercicio, escuela, etc.):** Persona #5 Edad

---

- 97 No Sabe
- 98 Se rehúsa a contestar

*If Q686 + Q707 + Q728 + Q749 + Q770 + Q791 + Q812 + Q833 + Q854 + Q875 is greater than 0 then skip to instruction before Q896*

*If not, then skip to instruction before Q899.*

**READ: LEA:** *De las personas que indicaste, por favor piensa con cuáles 5 personas has tenido el mayor contacto. Esto puede ser el mayor número de horas sin contacto físico (a 2 metros de distancia) con una persona y/o el mayor contacto físico. Por favor escribe sus nombres a continuación.*

Q896. **A continuación, vamos a anotar sus nombres.**  
**Mayor contacto:** Persona #1 Primer Nombre

-----

Q897. **Mayor contacto:** Persona #1 Apellido

-----

Q898. **Mayor contacto:** Persona #1 Apodo

-----

*If  $Q686 + Q707 + Q728 + Q749 + Q770 + Q791 + Q812 + Q833 + Q854 + Q875$  is greater than 1 then skip to Q899*

*If not, then skip to instruction before Q902.*

Q899. **Mayor contacto:** Persona #2 Primer Nombre

-----

Q900. **Mayor contacto:** Persona #2 Apellido

-----

Q901. **Mayor contacto:** Persona #2 Apodo

-----

*If  $Q686 + Q707 + Q728 + Q749 + Q770 + Q791 + Q812 + Q833 + Q854 + Q875$  is greater than 2 then skip to Q902*

*If not, then skip to instruction before Q905.*

Q902. **Mayor contacto:** Persona #3 Primer Nombre

-----

Q903. **Mayor contacto:** Persona #3 Apellido

-----

Q904. **Mayor contacto:** Persona #3 Apodo

-----

*If  $Q686 + Q707 + Q728 + Q749 + Q770 + Q791 + Q812 + Q833 + Q854 + Q875$  is greater than 3 then skip to Q905*

*If not, then skip to instruction before Q908.*



Q905. **Mayor contacto:** Persona #4 Primer Nombre

-----

Q906. **Mayor contacto:** Persona #4 Apellido

-----

Q907. **Mayor contacto:** Persona #4 Apodo

-----

*If Q686 + Q707 + Q728 + Q749 + Q770 + Q791 + Q812 + Q833 + Q854 + Q875 is greater than 4 then skip to Q908*

*If not, then skip to instruction before Q911.*

Q908. **Mayor contacto:** Persona #5 Primer Nombre

-----

Q909. **Mayor contacto:** Persona #5 Apellido

-----

Q910. **Mayor contacto:** Persona #5 Apodo

-----

*MCL1 = If(Q897 is not equal to 97 and Q897 is not equal to 98, Q897, )*

*MCN1 = If(Q898 is not equal to 97 and Q898 is not equal to 98, Q898, )*

*MCL2 = If(Q900 is not equal to 97 and Q900 is not equal to 98, Q900, )*

*MCN2 = If(Q901 is not equal to 97 and Q901 is not equal to 98, Q901, )*

*MCL3 = If(Q903 is not equal to 97 and Q903 is not equal to 98, Q903, )*

*MCN3 = If(Q904 is not equal to 97 and Q904 is not equal to 98, Q904, )*

*MCL4 = If(Q906 is not equal to 97 and Q906 is not equal to 98, Q906, )*

*MCN4 = If(Q907 is not equal to 97 and Q907 is not equal to 98, Q907, )*

*MCL5 = If(Q909 is not equal to 97 and Q909 is not equal to 98, Q909, )*

*MCN5 = If(Q910 is not equal to 97 and Q910 is not equal to 98, Q910, )*

**READ:** *Ahora te vamos a hacer algunas preguntas de seguimiento sobre las 5 personas con las que has tenido más contacto en los últimos 14 días.*

*If Q686 + Q707 + Q728 + Q749 + Q770 + Q791 + Q812 + Q833 + Q854 + Q875 is greater than 0 and Q896 is not equal to "Se rehúsa a contestar" and Q896 is not equal to "Saltó" then skip to Q911*

*If not, then skip to instruction before Q954.*

**Q911. ¿Es [Response to Q896] [MCL1] ([MCN1]) hombre, mujer, transgénero, no-binario u otro?**  
(Elija Uno)

- 1 Hombre
- 2 Mujer
- 3 Mujer Trans
- 4 Hombre Trans
- 5 No-binario/ genero no-binario / género fluido/ agénero
- 6 Otra identidad no en la lista
- 8 Se rehúsa a contestar

*If Q911 is equal to 6 then skip to Q912*

*If not, then skip to Q913.*

**Q912.** Por favor especifica la identidad de género de [Response to Q896].

-----

Q913. ¿Dónde vive [Response to Q896] principalmente? (Elija Uno)

- 1 Mexico
- 2 Estados Unidos
- 3 Otro
- 7 No Sabe
- 8 Se rehúsa a contestar

*If Q913 is equal to 3 then skip to Q914*

*If not, then skip to Q915.*

Q914. Por favor especifica donde vive principalmente [Response to Q896].

-----

Q915. **¿Conociste a [Response to Q896] por primera vez en los últimos 14 días?**

- 1 Si
- 0 No
- 8 Se rehúsa a contestar

Q916. **¿Cuántas veces has tenido contacto cercano (dentro de 2 metros) con [Response to Q896] en los últimos 14 días?**

— —

- 98 Se rehúsa a contestar

Q917. En promedio, durante los días que viste a [Response to Q896], ¿Cuánto tiempo (e.g. horas, minuto) duraste en contacto cercano con él/ella? Entrevistador: el tiempo máximo por día es 24 horas.

— —

HOURS

— —

MINUTES

98

Se rehúsa a contestar (Hours)

Q918. ¿Cuándo fue la última vez que tuviste contacto cercano con [Response to Q896] en los últimos 14 días? Entrevistador: Anotar cuántos días hace que el/la participante tuvo contacto cercano por última vez con la persona en cuestión. Si la última vez fue hoy, ingresa 0.

— — DÍAS

98 Se rehúsa a contestar (Días)

*If Q916 is greater than 1 then skip to Q919*

*If not, then skip to Q920.*

Q919. Durante el último contacto, ¿Por cuantos días consecutivos viste a [Response to Q896]?

— —

98 Se rehúsa a contestar

***MC1FDAY = If(Q918 is equal to 1, Q918, If(Q918 is not equal to 98 and Q918 is greater than 1, Q918 + Q919, "Falta"))***

Q920. La última vez que viste a [Response to Q896], ¿Qué tipo de contacto tuviste con esta persona? (elija todas las que apliquen) (Marque Todas las que Correspondan)

— Contacto físico, no sexual [e.g. saludo de mano, abrazo, contacto de piel, etc.]

— Contacto físico, sexual

— No físico [e.g. conversación en persona, comer/beber, junta]

— Se rehúsa a contestar

Q921. Cuando viste a [Response to Q896] por última vez, ¿en cuál de los siguientes lugares fué? (por favor escoge todas las que apliquen) (Marque Todas las que Correspondan)

- En casa/casa de alguien
- Trabajo
- Restaurante o café
- Tiempo Libre (i.e. cine, bar, club nocturno)
- Escuela/educación
- Ejercicio o relacionado al estado físico
- Servicio personal (i.e. corte de cabello, masaje)
- Servicio religioso
- Grupo comunitario
- Parque
- Calle
- El Bordo/Canal
- Picadero
- Otro
- Se rehúsa a contestar

***If Q921N is equal to 1 then skip to Q922***

***If not, then skip to instruction before Q923.***

Q922. Por favor especifica el lugar (e.g. el nombre del lugar y las calles que cruzan o la colonia) donde tuviste contacto cercano con [Response to Q896] por última vez.

-----

***If Q921A is equal to 1 then skip to Q923***

***If not, then skip to instruction before Q924.***

Q923. Tú nos dijiste que el último contacto cercano con [Response to Q896] fué en tu casa/la casa de alguien más. ¿Dónde se ubica esta casa? ¿Podrías darnos los nombres de las calles que cruzan la intersección más cercana? Entrevistador: Por favor anotar los nombres de las calles que lo cruzan. Si el participante no puede darnos esta información, pregúntele el nombre de la colonia y anote esa información.

-----  
-----

*If Q921B is equal to 1 then skip to Q924*

*If not, then skip to instruction before Q925.*

Q924. Tú nos dijiste que el último contacto cercano con [Response to Q896] fué en tu trabajo. ¿Nos podrías dar el nombre y la dirección de tu lugar de trabajo? Entrevistador: Si el lugar de trabajo no tiene nombre o dirección, anote cualquier información que se dé para la ubicación (e.g. nombre de calles, intersección más cercana, colonia)

-----  
-----

*If Q921C is equal to 1 then skip to Q925*

*If not, then skip to instruction before Q926.*

Q925. Tú nos dijiste que la última vez que estuviste en contacto cercano con [Response to Q896] fué en un restaurante/café. ¿Podrías darnos el nombre de este lugar y las calles que cruzan/colonia donde se ubica este restaurante?

-----  
-----

*If Q921D is equal to 1 then skip to Q926*

*If not, then skip to instruction before Q927.*

Q926. Tú nos dijiste que la última vez que estuviste en contacto cercano con [Response to Q896] ocurrió en un lugar de tiempo libre (e.g. teatro, bar, club nocturno). ¿Podrías darnos el nombre del lugar y las calles que lo cruzan/colonia donde se ubica este lugar?

-----  
-----

*If Q921E is equal to 1 then skip to Q927*

*If not, then skip to instruction before Q928.*

Q927. Tú nos dijiste que la última vez que estuviste en contacto cercano con [Response to Q896] fué en tu escuela o lugar de estudio. ¿Podrías darnos el nombre del lugar y las calles que cruzan/colonia donde se ubica este lugar?

-----  
-----

*If Q921F is equal to 1 then skip to Q928*

*If not, then skip to instruction before Q929.*

Q928. Tú nos dijiste que la última vez que estuviste en contacto cercano con [Response to Q896] fué en un gimnasio/centro fitness. ¿Podrías darnos el nombre del lugar y las calles que cruzan/colonia donde se ubica este lugar?

-----  
-----

*If Q921G is equal to 1 then skip to Q929*

*If not, then skip to instruction before Q930.*

Q929. Tú nos dijiste que la última vez que estuviste en contacto cercano con [Response to Q896] fué en un lugar donde dan servicios personales (e.g. corte de pelo, masaje). ¿Podrías darnos el nombre del lugar y las calles que cruzan/colonia donde se ubica este lugar?

-----  
-----

*If Q921H is equal to 1 then skip to Q930*

*If not, then skip to instruction before Q931.*

Q930. Tú nos dijiste que la última vez que estuviste en contacto cercano con [Response to Q896] fué en un lugar de servicio religioso. ¿Podrías darnos el nombre del lugar y las calles que cruzan/colonia donde se ubica este lugar?

-----  
-----

*If Q921I is equal to 1 then skip to Q931*

*If not, then skip to instruction before Q932.*

Q931. Tú nos dijiste que la última vez que estuviste en contacto cercano con [Response to Q896] fué en un centro comunitario/de reunión grupal. ¿Podrías darnos el nombre del lugar y las calles que cruzan/colonia donde se ubica este lugar?

-----  
-----

*If Q921J is equal to 1 then skip to Q932*

*If not, then skip to instruction before Q933.*

Q932. Tú nos dijiste que la última vez que estuviste en contacto cercano con [Response to Q896] fué en un parque. ¿Podrías darnos el nombre del lugar y las calles que cruzan/colonia donde se ubica este lugar?

-----  
-----

*If Q921K is equal to 1 then skip to Q933*

*If not, then skip to instruction before Q934.*

Q933. Tú nos dijiste que la última vez que estuviste en contacto cercano con [Response to Q896] fué en la calle. ¿Podrías darnos el nombre del lugar y las calles que cruzan/colonia donde se ubica este lugar?

-----  
-----

*If Q921M is equal to 1 then skip to Q934*

*If not, then skip to instruction before Q935.*



Q934. Tú nos dijiste que la última vez que estuviste en contacto cercano con [Response to Q896] fué en un picadero. ¿En qué picadero fué? (Elija Uno)

- 01 Las Palmitas/Zona Norte
- 02 Los Pinos/ Zona Norte
- 03 Las Bombas/ Zona Norte
- 04 Los Aragón/ Zona Norte
- 05 La Veinte/ Bordo, Col. Veinte de Noviembre
- 06 El Azteca/ Cerro Colorado
- 07 Oxxo, Calle 5ta Zona Norte
- 08 Bordo/ Los Álamos, Mundo divertido
- 09 Cañón Guerrero/Maclovio Herrera Colonia Guerrero
- 10 Col. Guaycura (casa privada)
- 11 Col. Presidentes (Infonavit edificio)
- 12 Florido 1era Sección (casa privada)
- 13 Florido 1era Sección (Bomberos, conecta)
- 14 Col. Francisco Villa (edificio abandonado)
- 15 Cañón del Pato/ Colonia Villa
- 16 Col. Postal (casa privada)
- 17 Col. del Río (Parte baja, barranco)
- 18 Sánchez Taboada (Av. Sánchez Taboada y Parque Industrial)
- 19 La cima (casa abandonado)
- 20 Otay módulos
- 21 Otro
- 98 Se rehúsa a contestar

**If Q934 is equal to 21 then skip to Q935**

**If not, then skip to instruction before Q936.**

Q935. Por favor especifica en cuál picadero (e.g. nombre del lugar y calles que cruzan o colonia) fué el último contacto cercano con [Response to Q896].

-----

**If Q916 is greater than 1 then skip to Q936**

**If not, then skip to instruction before Q954.**

Q936. Por favor piensa en alguna otra vez que tuviste contacto cercano con [Response to Q896] en los últimos 14 días, aparte del contacto cercano que nos acaba de describir con la persona en cuestión. Cuando decimos alguna otra vez, queremos decir un contacto en el tu viste a [Response to Q896] en persona y luego se separaron, ¿Cuántos días hace que se vieron?

|         |                              |
|---------|------------------------------|
| ___ ___ | DÍAS                         |
| 98      | Se rehúsa a contestar (Días) |

**If Q936 is less than MC1FDAY then READ: "Este tiempo es más reciente que el tiempo que Ud. indicó que tuvo el último contacto. Por favor realice las correcciones necesarias. TRANSLATION" and skip to Q936.**

**If Q916 is greater than 1 then skip to Q937**

**If not, then skip to Q938.**

Q937. Durante este contacto, ¿Cuántos días consecutivos viste a [Response to Q896]?

|         |                       |
|---------|-----------------------|
| ___ ___ |                       |
| 98      | Se rehúsa a contestar |

Q938. Cuándo viste a [Response to Q896] en esa ocasión, ¿qué tipo de contacto tuviste con él/ella? (Elije todas las que apliquen) (Marque Todas las que Correspondan)

- \_\_\_ Contacto físico, no sexual [e.g. saludo de mano, abrazo, contacto de piel, etc.]
- \_\_\_ Contacto físico, sexual
- \_\_\_ No físico [e.g. conversación en persona, comer/beber, junta]
- \_\_\_ Se rehúsa a contestar

Q939. Cuándo viste a [Response to Q896] en esa ocasión, ¿en cuál de los siguientes lugares fue que tuvieron contacto cercano? (elige todas las que apliquen) (Marque Todas las que Correspondan)

- En casa/casa de alguien
- Trabajo
- Restaurante o Café
- Tiempo Libre (i.e. cine, bar, club nocturno)
- Escuela/educación
- Ejercicio o relacionado al estado físico
- Servicio personal (i.e. corte de cabello, masaje)
- Servicio religioso
- Grupo comunitario
- Parque
- Calle
- El Bordo/Canal
- Picadero
- Otro
- Se rehúsa a contestar

***If Q939N is equal to 1 then skip to Q940***

***If not, then skip to instruction before Q941.***

Q940. Por favor especifica el lugar (e.g. nombre del lugar y las calles que cruzan o la colonia) donde fué ese contacto cercano con [Response to Q896].

---

***If Q939A is equal to 1 then skip to Q941***

***If not, then skip to instruction before Q942.***

Q941. Tú nos dijiste que el último contacto cercano con [Response to Q896] fué en tu casa/casa de alguien más. ¿Dónde se ubica esta casa? ¿Podrías darnos los nombres de las calles que cruzan la intersección más cercana? Entrevistador: Por favor anotar los nombres de las calles que lo cruzan. Si el participante no puede darnos esta información, pregúntele el nombre de la colonia y anote esa información.

-----  
-----

*If Q939B is equal to 1 then skip to Q942*

*If not, then skip to instruction before Q943.*

Q942. Tú nos dijiste que el último contacto cercano con [Response to Q896] fué en tu trabajo. ¿Nos podrías dar el nombre y la dirección de tu lugar de trabajo? Entrevistador: Si el lugar de trabajo no tiene nombre o dirección, anotar cualquier información que se dé para la ubicación (e.g. nombre de calles, intersección más cercana, colonia)

-----  
-----

*If Q939C is equal to 1 then skip to Q943*

*If not, then skip to instruction before Q944.*

Q943. Tú nos dijiste que la última vez que estuviste en contacto cercano con [Response to Q896] fué en un restaurante/café. ¿Podrías darnos el nombre de este lugar y las calles que cruzan/colonia donde se ubica este restaurante?

-----  
-----

*If Q939D is equal to 1 then skip to Q944*

*If not, then skip to instruction before Q945.*

Q944. Tú nos dijiste que la última vez que estuviste en contacto cercano con [Response to Q896] fué en un lugar de tiempo libre (e.g. teatro, bar, club nocturno). ¿Podrías darnos el nombre del lugar y las calles que cruzan/colonia donde se ubica este lugar?

-----  
-----

*If Q939E is equal to 1 then skip to Q945*

*If not, then skip to instruction before Q946.*

Q945. Tú nos dijiste que la última vez que estuviste en contacto cercano con [Response to Q896] fué en tu escuela o lugar de estudio. ¿Podrías darnos el nombre del lugar y las calles que cruzan/colonia donde se ubica este lugar?

-----  
-----

*If Q939F is equal to 1 then skip to Q946*

*If not, then skip to instruction before Q947.*

Q946. Tú nos dijiste que la última vez que estuviste en contacto cercano con [Response to Q896] fué en un gimnasio/centro fitness. ¿Podrías darnos el nombre del lugar y las calles que cruzan/colonia donde se ubica este lugar?

-----  
-----

*If Q939G is equal to 1 then skip to Q947*

*If not, then skip to instruction before Q948.*

Q947. Tú nos dijiste que la última vez que estuviste en contacto cercano con [Response to Q896] fué en un lugar donde dan servicios personales (e.g. corte de pelo, masaje). ¿Podrías darnos el nombre del lugar y las calles que cruzan/colonia donde se ubica este lugar?

-----  
-----

*If Q939H is equal to 1 then skip to Q948*

*If not, then skip to instruction before Q949.*

Q948. Tú nos dijiste que la última vez que estuviste en contacto cercano con [Response to Q896] fué en un lugar de servicio religioso. ¿Podrías darnos el nombre del lugar y las calles que cruzan/colonia donde se ubica este lugar?

-----  
-----

*If Q939I is equal to 1 then skip to Q949*

*If not, then skip to instruction before Q950.*

Q949. Tú nos dijiste que la última vez que estuviste en contacto cercano con [Response to Q896] fué en un centro comunitario/de reunión grupal. ¿Podrías darnos el nombre del lugar y las calles que cruzan/colonia donde se ubica este lugar?

-----  
-----

*If Q939J is equal to 1 then skip to Q950*

*If not, then skip to instruction before Q951.*

Q950. Tú nos dijiste que la última vez que estuviste en contacto cercano con [Response to Q896] fué en un parque. ¿Podrías darnos el nombre del lugar y las calles que cruzan/colonia donde se ubica este lugar?

-----  
-----

*If Q939K is equal to 1 then skip to Q951*

*If not, then skip to instruction before Q952.*

Q951. Tú nos dijiste que la última vez que estuviste en contacto cercano con [Response to Q896] fué en la calle ¿Podrías darnos el nombre del lugar y las calles que cruzan/colonia donde se ubica este lugar?

-----  
-----

*If Q939L is equal to 1 then skip to Q952*

*If not, then skip to instruction before Q953.*

Q952. Tú nos dijiste que la última vez que estuviste en contacto cercano con [Response to Q896] fué en un picadero. ¿En qué picadero fué? (Elija Uno)

- 01 Las Palmitas/Zona Norte
- 02 Los Pinos/ Zona Norte
- 03 Las Bombas/ Zona Norte
- 04 Los Aragón/ Zona Norte
- 05 Los Aragón/ Zona Norte
- 06 El Azteca/ Cerro Colorado
- 07 Oxxo, Calle 5ta Zona Norte
- 08 Bordo/ Los Álamos, Mundo divertido
- 09 Cañón Guerrero/Maclovio Herrera Colonia Guerrero
- 10 Col. Guaycura (casa privada)
- 11 Col. Presidentes (Infonavit edificio)
- 12 Florido 1era Sección (casa privada)
- 13 Florido 1era Sección (Bomberos, conecta)
- 14 Col. Francisco Villa (edificio abandonado)
- 15 Cañón del Pato/ Colonia Villa
- 16 Col. Postal (casa privada)
- 17 Col. del Río (Parte baja, barranco)
- 18 Sánchez Taboada (Av. Sánchez Taboada y Parque Industrial)
- 19 La cima (casa abandonado)
- 20 Otay módulos
- 21 Otro
- 98 Se rehúsa a contestar

***If Q952 is equal to 21 then skip to Q953***

***If not, then skip to instruction before Q954.***

Q953. Por favor especifica en qué picadero fué (e.g. nombre del lugar y calles que cruzan o colonia) el último contacto cercano con [Response to Q896].

---

***If Q686 + Q707 + Q728 + Q749 + Q770 + Q791 + Q812 + Q833 + Q854 + Q875 is greater than 1 and Q899 is not equal to "Se rehúsa a contestar" and Q899 is not equal to "Saltó" then skip to Q954***

***If not, then skip to instruction before Q997.***

Q954. ¿Es [Response to Q899] [MCL2] ([MCN2]) hombre, mujer, transgénero, no-binario u otro? (Elija Uno)

- 1 Hombre
- 2 Mujer
- 3 Mujer Trans
- 4 Hombre Trans
- 5 No-binario/ genero no-binario / género fluido/ agénero
- 6 Otra identidad no en la lista
- 8 Se rehúsa a contestar

***If Q954 is equal to 6 then skip to Q955***

***If not, then skip to Q956.***

Q955. Por favor especifica la identidad de género de [Response to Q899].



Q956. ¿Dónde vive [Response to Q899] principalmente? (Elija Uno)

- 1 Mexico
- 2 Estados Unidos
- 3 Otro
- 7 No Sabe
- 8 Se rehúsa a contestar

*If Q956 is equal to 3 then skip to Q957*

*If not, then skip to Q958.*

Q957. Por favor especifica dónde vive principalmente [Response to Q899].

-----

Q958. ¿Conociste a [Response to Q899] por primera vez en los últimos 14 días?

- 1 Si
- 0 No
- 8 Se rehúsa a contestar

Q959. ¿Cuántas veces has tenido contacto cercano (dentro de 2 metros) con [Response to Q899] en los últimos 14 días?

— —

- 98 Se rehúsa a contestar

Q960. En promedio, durante los días que viste a [Response to Q899], ¿Cuánto tiempo (e.g. horas, minuto) duraste en contacto cercano con él/ella? Entrevistador: el tiempo máximo por día es 24 horas.

— —

HOURS

— —

MINUTES

- 98 Se rehúsa a contestar (Hours)

Q961. ¿Cuándo fue la última vez que tuviste contacto cercano con [Response to Q899] en los últimos 14 días? Entrevistador: Anotar cuántos días hace que el/la participante tuvo contacto cercano por última vez con la persona en cuestión. Si la última vez fue hoy, ingresa 0.

— — DÍAS

98 Se rehúsa a contestar (Días)

*If Q959 is greater than 1 then skip to Q962*

*If not, then skip to Q963.*

Q962. Durante el último contacto, ¿Por cuántos días consecutivos viste a [Response to Q899]?

— —

98 Se rehúsa a contestar

***MC2FDAY = If(Q961 is equal to 1, Q961, If(Q961 is not equal to 98 and Q961 is greater than 1, Q961 + Q962, "Falta"))***

Q963. La última vez que viste a [Response to Q899], ¿Qué tipo de contacto tuviste con esta persona? (elija todas las que apliquen) (Marque Todas las que Correspondan)

— Contacto físico, no sexual [e.g. saludo de mano, abrazo, contacto de piel, etc.]

— Contacto físico, sexual

— No físico [e.g. conversación en persona, comer/beber, junta]

— Se rehúsa a contestar

Q964. Cuando viste a [Response to Q899] durante el contacto, ¿en cuál de los siguientes lugares fué? (por favor escoge todas las que apliquen) (Marque Todas las que Correspondan)

- En casa/casa de alguien
- Trabajo
- Restaurante o café
- Tiempo Libre (i.e. cine, bar, club nocturno)
- Escuela/educación
- Ejercicio o relacionado al estado físico
- Servicio personal (i.e. corte de cabello, masaje)
- Servicio religioso
- Grupo comunitario
- Parque
- Calle
- El Bordo/Canal
- Picadero
- Otro
- Se rehúsa a contestar

***If Q964N is equal to 1 then skip to Q965***

***If not, then skip to instruction before Q966.***

Q965. Por favor especifica el lugar (e.g. el nombre del lugar y las calles que cruzan o la colonia) donde tuviste contacto cercano con [Response to Q899] por última vez.

-----

***If Q964A is equal to 1 then skip to Q966***

***If not, then skip to instruction before Q967.***

Q966. Tú nos dijiste que el último contacto cercano con [Response to Q899] fué en tu casa/casa de alguien más. ¿Dónde se ubica esta casa? ¿Podrías darnos los nombres de las calles que cruzan la intersección más cercana? Entrevistador: Por favor anotar los nombres de las calles que cruzan. Si el participante no puede darnos esta información, pregúntele el nombre de la colonia y anote esa información.

-----  
-----

*If Q964B is equal to 1 then skip to Q967*

*If not, then skip to instruction before Q968.*

Q967. Tú nos dijiste que el último contacto cercano con [Response to Q899] fué en tu trabajo. ¿Nos podrías dar el nombre y la dirección de tu lugar de trabajo? Entrevistador: Si el lugar de trabajo no tiene nombre o dirección, ingresar cualquier información que se dé para la ubicación (e.g. nombre de calles, intersección más cercana, colonia)

-----  
-----

*If Q964C is equal to 1 then skip to Q968*

*If not, then skip to instruction before Q969.*

Q968. Tú nos dijiste que la última vez que estuviste en contacto cercano con [Response to Q899] fué en un restaurante/café. ¿Podrías darnos el nombre de este lugar y las calles que cruzan/colonia donde se ubica este restaurante?

-----  
-----

*If Q964D is equal to 1 then skip to Q969*

*If not, then skip to instruction before Q970.*

Q969. Tú nos dijiste que la última vez que estuviste en contacto cercano con [Response to Q899] fué en un lugar de tiempo libre (e.g. teatro, bar, club nocturno). ¿Podrías darnos el nombre del lugar y las calles que cruzan/colonia donde se ubica este lugar?

-----  
-----

*If Q964E is equal to 1 then skip to Q970*

*If not, then skip to instruction before Q971.*

Q970. Tú nos dijiste que la última vez que estuviste en contacto cercano con [Response to Q899] fué en tu escuela o lugar de estudio. ¿Podrías darnos el nombre del lugar y las calles que cruzan/colonia donde se ubica este lugar?

-----  
-----

*If Q964F is equal to 1 then skip to Q971*

*If not, then skip to instruction before Q972.*

Q971. Tú nos dijiste que la última vez que estuviste en contacto cercano con [Response to Q899] fué en un gimnasio/centro fitness. ¿Podrías darnos el nombre del lugar y las calles que cruzan/colonia donde se ubica este lugar?

-----  
-----

*If Q964G is equal to 1 then skip to Q972*

*If not, then skip to instruction before Q973.*

Q972. Tú nos dijiste que la última vez que estuviste en contacto cercano con [Response to Q899] fué en un lugar donde dan servicios personales (e.g. corte de pelo, masaje). ¿Podrías darnos el nombre del lugar y las calles que cruzan/colonia donde se ubica este lugar?

-----  
-----

*If Q964H is equal to 1 then skip to Q973*

*If not, then skip to instruction before Q974.*

Q973. Tú nos dijiste que la última vez que estuviste en contacto cercano con [Response to Q899] fué en un lugar de servicio religioso. ¿Podrías darnos el nombre del lugar y las calles que cruzan/colonia donde se ubica este lugar?

-----  
-----

*If Q964I is equal to 1 then skip to Q974*

*If not, then skip to instruction before Q975.*

Q974. Tú nos dijiste que la última vez que estuviste en contacto cercano con [Response to Q899] fué en un centro comunitario/de reunión grupal. ¿Podrías darnos el nombre del lugar y las calles que cruzan/colonia donde se ubica este lugar?

-----  
-----

*If Q964J is equal to 1 then skip to Q975*

*If not, then skip to instruction before Q976.*

Q975. Tú nos dijiste que la última vez que estuviste en contacto cercano con [Response to Q899] fué en un parque. ¿Podrías darnos el nombre del lugar y las calles que cruzan/colonia donde se ubica este lugar?

-----  
-----

*If Q964K is equal to 1 then skip to Q976*

*If not, then skip to instruction before Q977.*

Q976. Tú nos dijiste que la última vez que estuviste en contacto cercano con [Response to Q899] fué en la calle. ¿Podrías darnos el nombre del lugar y las calles que cruzan/colonia donde se ubica este lugar?

-----  
-----

*If Q964M is equal to 1 then skip to Q977*

*If not, then skip to instruction before Q978.*

Q977. Tú nos dijiste que la última vez que estuviste en contacto cercano con [Response to Q899] fué en un picadero. ¿En qué picadero fué? (Elija Uno)

- 01 Las Palmitas/Zona Norte
- 02 Los Pinos/ Zona Norte
- 03 Las Bombas/ Zona Norte
- 04 Los Aragón/ Zona Norte
- 05 La Veinte/ Bordo, Col. Veinte de Noviembre
- 06 El Azteca/ Cerro Colorado
- 07 Oxxo, Calle 5ta Zona Norte
- 08 Bordo/ Los Álamos, Mundo divertido
- 09 Cañón Guerrero/Maclovio Herrera Colonia Guerrero
- 10 Col. Guaycura (casa privada)
- 11 Col. Presidentes (Infonavit edificio)
- 12 Florido 1era Sección (casa privada)
- 13 Florido 1era Sección (Bomberos, conecta)
- 14 Col. Francisco Villa (edificio abandonado)
- 15 Cañón del Pato/ Colonia Villa
- 16 Col. Postal (casa privada)
- 17 Col. del Río (Parte baja, barranco)
- 18 Sánchez Taboada (Av. Sánchez Taboada y Parque Industrial)
- 19 La cima (casa abandonado)
- 20 Otay módulos
- 21 Otros
- 98 Se rehúsa a contestar

**If Q977 is equal to 21 then skip to Q978**

**If not, then skip to instruction before Q979.**

Q978. Por favor especifica en cuál picadero fué (e.g. nombre del lugar y calles que cruzan o colonia) el último contacto cercano con [Response to Q899].

-----

**If Q959 is greater than 1 then skip to Q979**

**If not, then skip to instruction before Q997.**

Q979. Por favor piensa en alguna otra vez que tuviste contacto cercano con [Response to Q899] en los últimos 14 días, aparte del contacto cercano que nos acaba de describir con la persona en cuestión. Cuando decimos alguna otra vez, queremos decir un contacto en el tu viste a [Response to Q899] en persona y luego se separaron, ¿Cuántos días hace que se vieron?

\_\_\_ \_\_\_ DÍAS

98 Se rehúsa a contestar (Días)

**If Q979 is less than MC2FDAY then READ: "Este tiempo es más reciente que el tiempo que Ud. indicó que tuvo el último contacto. Por favor realice las correcciones necesarias. TRANSLATION" and skip to Q979.**

**If Q959 is greater than 1 then skip to Q980**

**If not, then skip to Q981.**

Q980. Durante este contacto, ¿Cuántos días consecutivos viste a [Response to Q899]?

\_\_\_ \_\_\_

98 Se rehúsa a contestar

Q981. Cuándo viste a [Response to Q896] en esa ocasión, ¿qué tipo de contacto tuviste con él/ella? (Elije todas las que apliquen) (Marque Todas las que Correspondan)

\_\_\_ Contacto físico, no sexual [e.g. saludo de mano, abrazo, contacto de piel, etc.]

\_\_\_ Contacto físico, sexual

\_\_\_ No físico [e.g. conversación en persona, comer/beber, junta]

\_\_\_ Se rehúsa a contestar



Q982. Cuándo viste a [Response to Q899] en esa ocasión, ¿en cuál de los siguientes lugares fue que tuvieron contacto cercano? (elige todas las que apliquen) (Marque Todas las que Correspondan)

- En casa/casa de alguien
- Trabajo
- Restaurante o café
- Tiempo Libre (i.e. cine, bar, club nocturno)
- Escuela/educación
- Ejercicio o relacionado al estado físico
- Servicio personal (i.e. corte de cabello, masaje)
- Servicio religioso
- Grupo comunitario
- Parque
- Calle
- El Bordo/Canal
- Picadero
- Otro
- Se rehúsa a contestar

***If Q982N is equal to 1 then skip to Q983***

***If not, then skip to instruction before Q984.***

Q983. Por favor especifica el lugar (e.g. el nombre del lugar y las calles que cruzan o la colonia) donde tuviste contacto cercano con [Response to Q899] por última vez.

-----

***If Q982A is equal to 1 then skip to Q984***

***If not, then skip to instruction before Q985.***

Q984. Tú nos dijiste que el último contacto cercano con [Response to Q899] fué en tu casa/casa de alguien más. ¿Dónde se ubica esta casa? ¿Podrías darnos los nombres de las calles que cruzan la intersección más cercana? Entrevistador: Por favor anote los nombres de las calles que lo cruzan. Si el participante no puede darnos esta información, pregúntele el nombre de la colonia y anote esa información.

-----  
-----

*If Q982B is equal to 1 then skip to Q985*

*If not, then skip to instruction before Q986.*

Q985. Tú nos dijiste que el último contacto cercano con [Response to Q899] fué en tu trabajo. ¿Nos podrías dar el nombre y la dirección de tu lugar de trabajo? Entrevistador: Si el lugar de trabajo no tiene nombre o dirección, ingresar cualquier información que se dé para la ubicación (e.g. nombre de calles, intersección más cercana, colonia)

-----  
-----

*If Q982C is equal to 1 then skip to Q986*

*If not, then skip to instruction before Q987.*

Q986. Tú nos dijiste que la última vez que estuviste en contacto cercano con [Response to Q899] fué en un restaurante/café. ¿Podrías darnos el nombre de este lugar y las calles que cruzan/colonia donde se ubica este restaurante?

-----  
-----

*If Q982D is equal to 1 then skip to Q987*

*If not, then skip to instruction before Q988.*

Q987. Tú nos dijiste que la última vez que estuviste en contacto cercano con [Response to Q899] fué en un lugar de tiempo libre (e.g. teatro, bar, club nocturno). ¿Podrías darnos el nombre del lugar y las calles que cruzan/colonia donde se ubica este lugar?

-----  
-----

*If Q982E is equal to 1 then skip to Q988*

*If not, then skip to instruction before Q989.*

Q988. Tú nos dijiste que la última vez que estuviste en contacto cercano con [Response to Q899] fué en tu escuela o lugar de estudio. ¿Podrías darnos el nombre del lugar y las calles que cruzan/colonia donde se ubica este lugar?

-----  
-----

*If Q982F is equal to 1 then skip to Q989*

*If not, then skip to instruction before Q990.*

Q989. Tú nos dijiste que la última vez que estuviste en contacto cercano con [Response to Q899] fué en gimnasio/centro fitness. ¿Podrías darnos el nombre del lugar y las calles que cruzan/colonia donde se ubica este lugar?

-----  
-----

*If Q982G is equal to 1 then skip to Q990*

*If not, then skip to instruction before Q991.*

Q990. Tú nos dijiste que la última vez que estuviste en contacto cercano con [Response to Q899] fué en un lugar donde dan servicios personales (e.g. corte de pelo, masaje). ¿Podrías darnos el nombre del lugar y las calles que cruzan/colonia donde se ubica este lugar?

-----  
-----

*If Q982H is equal to 1 then skip to Q991*

*If not, then skip to instruction before Q992.*

Q991. Tú nos dijiste que la última vez que estuviste en contacto cercano con [Response to Q899] fué en un lugar de servicio religioso. ¿Podrías darnos el nombre del lugar y las calles que cruzan/colonia donde se ubica este lugar?

-----  
-----

*If Q982I is equal to 1 then skip to Q992*

*If not, then skip to instruction before Q993.*

Q992. Tú nos dijiste que la última vez que estuviste en contacto cercano con [Response to Q899] fué en un centro comunitario/de reunión grupal. ¿Podrías darnos el nombre del lugar y las calles que cruzan/colonia donde se ubica este lugar?

-----  
-----

*If Q982J is equal to 1 then skip to Q993*

*If not, then skip to instruction before Q994.*

Q993. Tú nos dijiste que la última vez que estuviste en contacto cercano con [Response to Q899] fué en un parque. ¿Podrías darnos el nombre del lugar y las calles que cruzan/colonia donde se ubica este lugar?

-----  
-----

*If Q982K is equal to 1 then skip to Q994*

*If not, then skip to instruction before Q995.*

Q994. Tú nos dijiste que la última vez que estuviste en contacto cercano con [Response to Q899] fué en la calle. ¿Podrías darnos el nombre del lugar y las calles que cruzan/colonia donde se ubica este lugar?

-----  
-----

*If Q982M is equal to 1 then skip to Q995*

*If not, then skip to instruction before Q996.*

Q995. Tú nos dijiste que la última vez que estuviste en contacto cercano con [Response to Q899] fué en un picadero. ¿En qué picadero fué? (Elija Uno)

- 01 Las Palmitas/Zona Norte
- 02 Los Pinos/ Zona Norte
- 03 Las Bombas/ Zona Norte
- 04 Los Aragón/ Zona Norte
- 05 La Veinte/ Bordo, Col. Veinte de Noviembre
- 06 El Azteca/ Cerro Colorado
- 07 Oxxo, Calle 5ta Zona Norte
- 08 Bordo/ Los Álamos, Mundo divertido
- 09 Cañón Guerrero/Maclovio Herrera Colonia Guerrero
- 10 Col. Guaycura (casa privada)
- 11 Col. Presidentes (Infonavit edificio)
- 12 Florido 1era Sección (casa privada)
- 13 Florido 1era Sección (Bomberos, conecta)
- 14 Col. Francisco Villa (edificio abandonado)
- 15 Cañón del Pato/ Colonia Villa
- 16 Col. Postal (casa privada)
- 17 Col. del Río (Parte baja, barranco)
- 18 Sánchez Taboada (Av. Sánchez Taboada y Parque Industrial)
- 19 La cima (casa abandonado)
- 20 Otay módulos
- 21 Otro
- 98 Se rehúsa a contestar

***If Q995 is equal to 21 then skip to Q996***

***If not, then skip to instruction before Q997.***

Q996. Por favor especifica en qué picadero (e.g. nombre del lugar y calles que cruzan o colonia) fué el último contacto cercano con [Response to Q899].

-----

***If Q686 + Q707 + Q728 + Q749 + Q770 + Q791 + Q812 + Q833 + Q854 + Q875 is greater than 2 and Q902 is not equal to "Se rehúsa a contestar" and Q902 is not equal to "Saltó" then skip to Q997***

***If not, then skip to instruction before Q1040.***

Q997. ¿Es [Response to Q902] [MCL3] ([MCN3]) hombre, mujer, transgénero, no-binario u otro? (Elija Uno)

- 1 Hombre
- 2 Mujer
- 3 Mujer Trans
- 4 Hombre Trans
- 5 No-binario/ genero no-binario / género fluido/ agénero
- 6 Otra identidad no en la lista
- 8 Se rehúsa a contestar

***If Q997 is equal to 6 then skip to Q998***

***If not, then skip to Q999.***

Q998. Por favor especifica la identidad de género de [Response to Q902].

-----

Q999. ¿Dónde vive [Response to Q902] principalmente? (Elija Uno)

- 1 Mexico
- 2 Estados Unidos
- 3 Otro
- 7 No Sabe
- 8 Se rehúsa a contestar

*If Q999 is equal to 3 then skip to Q1000*

*If not, then skip to Q1001.*

Q1000. Por favor especifica donde vive principalmente [Response to Q902].

-----

Q1001. ¿Conociste a [Response to Q902] por primera vez en los últimos 14 días?

- 1 Si
- 0 No
- 8 Se rehúsa a contestar

Q1002. ¿Cuántas veces has tenido contacto cercano (dentro de 2 metros) con [Response to Q902] en los últimos 14 días?

— —

- 98 Se rehúsa a contestar

Q1003. En promedio, durante los días que viste a [Response to Q902], ¿Cuánto tiempo (e.g. horas, minuto) duraste en contacto cercano con él/ella? Entrevistador: el tiempo máximo por día es 24 horas.

— —

HOURS

— —

MINUTES

- 98 Se rehúsa a contestar (Hours)

Q1004. ¿Cuándo fue la última vez que tuviste contacto cercano con [Response to Q902] en los últimos 14 días? Entrevistador: Anote cuántos días hace que el/la participante tuvo contacto cercano por última vez con la persona en cuestión. Si la última vez fue hoy, ingresa 0.

— — DÍAS  
 98 Se rehúsa a contestar (Días)

*If Q1002 is greater than 1 then skip to Q1005*

*If not, then skip to Q1006.*

Q1005. Durante el último contacto, ¿Por cuántos días consecutivos viste a [Response to Q902]?

— —  
 98 Se rehúsa a contestar

***MC3FDAY = If(Q1004 is equal to 1, Q1004, If(Q1004 is not equal to 98 and Q1004 is greater than 1, Q1004 + Q1005, "Falta"))***

Q1006. Cuando viste a [Response to Q902], ¿Qué tipo de contacto tuviste con esta persona (por favor escoge todas las que apliquen)? (Marque Todas las que Correspondan)

- Contacto físico, no sexual [e.g. saludo de mano, abrazo, contacto de piel, etc.]
- Contacto físico, sexual
- No físico [e.g. conversación en persona, comer/beber, junta]
- Se rehúsa a contestar



Q1007. Cuando viste a [Response to Q902] durante el contacto, ¿en cuál de los siguientes lugares fué?  
(por favor escoge todas las que apliquen) (Marque Todas las que Correspondan)

- En casa/casa de alguien
- Trabajo
- Restaurante o café
- Tiempo Libre (i.e. cine, bar, club nocturno)
- Escuela/educación
- Ejercicio o relacionado al estado físico
- Servicio personal (i.e. corte de cabello, masaje)
- Servicio religioso
- Grupo comunitario
- Parque
- Calle
- El Bordo/Canal
- Picadero
- Otro
- Se rehúsa a contestar

***If Q1007N is equal to 1 then skip to Q1008***

***If not, then skip to instruction before Q1009.***

Q1008. Por favor especifica el lugar (e.g. el nombre del lugar y las calles que cruzan o la colonia) donde tuviste contacto cercano con [Response to Q902] por última vez.

-----

***If Q1007A is equal to 1 then skip to Q1009***

***If not, then skip to instruction before Q1010.***

Q1009. Tú nos dijiste que el último contacto cercano con [Response to Q902] fué en tu casa/casa de alguien más. ¿Dónde se ubica esta casa? ¿Podrías darnos los nombres de las calles que cruzan la intersección más cercana? Entrevistador: Por favor anote los nombres de las calles que cruzan. Si el participante no puede darnos esta información, pregúntele el nombre de la colonia y anote esa información.

-----  
-----

*If Q1007B is equal to 1 then skip to Q1010*

*If not, then skip to instruction before Q1011.*

Q1010. Tú nos dijiste que el último contacto cercano con [Response to Q902] fué en tu trabajo. ¿Nos podrías dar el nombre y la dirección de tu lugar de trabajo? Entrevistador: Si el lugar de trabajo no tiene nombre o dirección, anota cualquier información que se dé para la ubicación (e.g. nombre de calles, intersección más cercana, colonia)

-----  
-----

*If Q1007C is equal to 1 then skip to Q1011*

*If not, then skip to instruction before Q1012.*

Q1011. Tú nos dijiste que la última vez que estuviste en contacto cercano con [Response to Q902] fué en un restaurante/café. ¿Podrías darnos el nombre de este lugar y las calles que cruzan/colonia donde se ubica este restaurante?

-----  
-----

*If Q1007D is equal to 1 then skip to Q1012*

*If not, then skip to instruction before Q1013.*

Q1012. Tú nos dijiste que la última vez que estuviste en contacto cercano con [Response to Q902] fué en un lugar de tiempo libre (e.g. teatro, bar, club nocturno). ¿Podrías darnos el nombre del lugar y las calles que cruzan/colonia donde se ubica este lugar?

-----  
-----

*If Q1007E is equal to 1 then skip to Q1013*

*If not, then skip to instruction before Q1014.*

Q1013. Tú nos dijiste que la última vez que estuviste en contacto cercano con [Response to Q902] fué en tu escuela o lugar de estudio. ¿Podrías darnos el nombre del lugar y las calles que cruzan/colonia donde se ubica este lugar?

-----  
-----

*If Q1007F is equal to 1 then skip to Q1014*

*If not, then skip to instruction before Q1015.*

Q1014. Tú nos dijiste que la última vez que estuviste en contacto cercano con [Response to Q902] fué en un gimnasio/centro fitness. ¿Podrías darnos el nombre del lugar y las calles que cruzan/colonia donde se ubica este lugar?

-----  
-----

*If Q1007G is equal to 1 then skip to Q1015*

*If not, then skip to instruction before Q1016.*

Q1015. Tú nos dijiste que la última vez que estuviste en contacto cercano con [Response to Q902] fué en un lugar donde dan servicios personales (e.g. corte de pelo, masaje). ¿Podrías darnos el nombre del lugar y las calles que cruzan/colonia donde se ubica este lugar?

-----  
-----

*If Q1007H is equal to 1 then skip to Q1016*

*If not, then skip to instruction before Q1017.*

Q1016. Tú nos dijiste que la última vez que estuviste en contacto cercano con [Response to Q902] fué en un lugar de servicio religioso. ¿Podrías darnos el nombre del lugar y las calles que cruzan/colonia donde se ubica este lugar?

-----  
-----

*If Q1007I is equal to 1 then skip to Q1017*

*If not, then skip to instruction before Q1018.*

Q1017. Tú nos dijiste que la última vez que estuviste en contacto cercano con [Response to Q902] fué en un centro comunitario/de reunión grupal. ¿Podrías darnos el nombre del lugar y las calles que cruzan/colonia donde se ubica este lugar?

-----  
-----

*If Q1007J is equal to 1 then skip to Q1018*

*If not, then skip to instruction before Q1019.*

Q1018. Tú nos dijiste que la última vez que estuviste en contacto cercano con [Response to Q902] fué en un parque. ¿Podrías darnos el nombre del lugar y las calles que cruzan/colonia donde se ubica este lugar?

-----  
-----

*If Q1007K is equal to 1 then skip to Q1019*

*If not, then skip to instruction before Q1020.*

Q1019. Tú nos dijiste que la última vez que estuviste en contacto cercano con [Response to Q902] fué en la calle. ¿Podrías darnos el nombre del lugar y las calles que cruzan/colonia donde se ubica este lugar?

-----  
-----

*If Q1007M is equal to 1 then skip to Q1020*

*If not, then skip to instruction before Q1021.*

Q1020. Tú nos dijiste que la última vez que estuviste en contacto cercano con [Response to Q902] fué en un picadero. ¿En qué picadero fué? (Elija Uno)

- 01 Las Palmitas/Zona Norte
- 02 Los Pinos/ Zona Norte
- 03 Las Bombas/ Zona Norte
- 04 Los Aragón/ Zona Norte
- 05 La Veinte/ Bordo, Col. Veinte de Noviembre
- 06 El Azteca/ Cerro Colorado
- 07 Oxxo, Calle 5ta Zona Norte
- 08 Bordo/ Los Álamos, Mundo divertido
- 09 Cañón Guerrero/Maclovio Herrera Colonia Guerrero
- 10 Col. Guaycura (casa privada)
- 11 Col. Presidentes (Infonavit edificio)
- 12 Florido 1era Sección (casa privada)
- 13 Florido 1era Sección (Bomberos, conecta)
- 14 Col. Francisco Villa (edificio abandonado)
- 15 Cañón del Pato/ Colonia Villa
- 16 Col. Postal (casa privada)
- 17 Col. del Río (Parte baja, barranco)
- 18 Sánchez Taboada (Av. Sánchez Taboada y Parque Industrial)
- 19 La cima (casa abandonado)
- 20 Otay módulos
- 21 Otro
- 98 Se rehúsa a contestar

***If Q1020 is equal to 21 then skip to Q1021***

***If not, then skip to instruction before Q1022.***

Q1021. Por favor especifica en qué picadero (e.g. nombre del lugar y calles que cruzan o colonia) fué el último contacto cercano con [Response to Q902].

-----

***If Q1002 is greater than 1 then skip to Q1022***

***If not, then skip to instruction before Q1040.***

Q1022. Por favor piensa en alguna otra vez que tuviste contacto cercano con [Response to Q902] en los últimos 14 días, aparte del contacto cercano que nos acaba de describir con la persona en cuestión. Cuando decimos alguna otra vez, queremos decir un contacto en el tu viste a [Response to Q902] en persona y luego se separaron, ¿Cuántos días hace que se vieron?

\_\_\_ \_\_\_ DÍAS  
 98 Se rehúsa a contestar (Días)

***If Q1022 is less than MC3FDAY then READ: "Este tiempo es más reciente que el tiempo que Ud. indicó que tuvo el último contacto. Por favor realice las correcciones necesarias. TRANSLATION" and skip to Q1022.***

***If Q1002 is greater than 1 then skip to Q1023***

***If not, then skip to Q1024.***

Q1023. Durante este contacto, ¿Cuántos días consecutivos viste a [Response to Q902]?

\_\_\_ \_\_\_  
 98 Se rehúsa a contestar

Q1024. Cuándo viste a [Response to Q902] en esa ocasión, ¿qué tipo de contacto tuviste con él/ella? (Elije todas las que apliquen) (Marque Todas las que Correspondan)

- \_\_\_ Contacto físico, no sexual [e.g. saludo de mano, abrazo, contacto de piel, etc.]
- \_\_\_ Contacto físico, sexual
- \_\_\_ No físico [e.g. conversación en persona, comer/beber, junta]
- \_\_\_ Se rehúsa a contestar

Q1025. Cuándo viste a [Response to Q902] en esa ocasión, ¿en cuál de los siguientes lugares fue que tuvieron contacto cercano? (elige todas las que apliquen) (Marque Todas las que Correspondan)

- En casa/casa de alguien
- Trabajo
- Restaurante o Café
- Tiempo Libre (i.e. cine, bar, club nocturno)
- Escuela/educación
- Ejercicio o relacionado al estado físico
- Servicio personal (i.e. corte de cabello, masaje)
- Servicio religioso
- Grupo comunitario
- Parque
- Calle
- El Bordo/Canal
- Picadero
- Otro
- Se rehúsa a contestar

***If Q1025N is equal to 1 then skip to Q1026***

***If not, then skip to instruction before Q1027.***

Q1026. Por favor especifica el lugar (e.g. nombre del lugar y las calles que cruzan o la colonia) donde fué ese contacto cercano con [Response to Q902].

-----

***If Q1025A is equal to 1 then skip to Q1027***

***If not, then skip to instruction before Q1028.***

Q1027. Tú nos dijiste que el último contacto cercano con [Response to Q902] fué en tu casa/casa de alguien más. ¿Dónde se ubica esta casa? ¿Podrías darnos los nombres de las calles que cruzan la intersección más cercana? Entrevistador: Por favor anote los nombres de las calles que lo cruzan. Si el participante no puede darnos esta información, preguntarles el nombre de la colonia y anote esa información.

-----  
-----

***If Q1025B is equal to 1 then skip to Q1028***

***If not, then skip to instruction before Q1029.***

Q1028. Tú nos dijiste que el último contacto cercano con [Response to Q902] fué en tu trabajo. ¿Nos podrías dar el nombre y la dirección de tu lugar de trabajo? Entrevistador: Si el lugar de trabajo no tiene nombre o dirección, anote cualquier información que se dé para la ubicación (e.g. nombre de calles, intersección más cercana, colonia)

-----  
-----

***If Q1025C is equal to 1 then skip to Q1029***

***If not, then skip to instruction before Q1030.***

Q1029. Tú nos dijiste que la última vez que estuviste en contacto cercano con [Response to Q902] fué en un restaurante/café. ¿Podrías darnos el nombre de este lugar y las calles que cruzan/colonia donde se ubica este restaurante?

-----  
-----

***If Q1025D is equal to 1 then skip to Q1030***

***If not, then skip to instruction before Q1031.***

Q1030. Tú nos dijiste que la última vez que estuviste en contacto cercano con [Response to Q902] fué en un lugar de tiempo libre (e.g. teatro, bar, club nocturno). ¿Podrías darnos el nombre del lugar y las calles que cruzan/colonia donde se ubica este lugar?

-----  
-----

***If Q1025E is equal to 1 then skip to Q1031***

***If not, then skip to instruction before Q1032.***



Q1031. Tú nos dijiste que la última vez que estuviste en contacto cercano con [Response to Q902] fué en tu escuela o lugar de estudio. ¿Podrías darnos el nombre del lugar y las calles que cruzan/colonia donde se ubica este lugar?

-----  
-----

*If Q1025F is equal to 1 then skip to Q1032*

*If not, then skip to instruction before Q1033.*

Q1032. Tú nos dijiste que la última vez que estuviste en contacto cercano con [Response to Q902] fué en un gimnasio/centro fitness. ¿Podrías darnos el nombre del lugar y las calles que cruzan/colonia donde se ubica este lugar?

-----  
-----

*If Q1025G is equal to 1 then skip to Q1033*

*If not, then skip to instruction before Q1034.*

Q1033. Tú nos dijiste que la última vez que estuviste en contacto cercano con [Response to Q902] fué en un lugar donde dan servicios personales (e.g. corte de pelo, masaje). ¿Podrías darnos el nombre del lugar y las calles que cruzan/colonia donde se ubica este lugar?

-----  
-----

*If Q1025H is equal to 1 then skip to Q1034*

*If not, then skip to instruction before Q1035.*

Q1034. Tú nos dijiste que la última vez que estuviste en contacto cercano con [Response to Q902] fué en un lugar de servicio religioso. ¿Podrías darnos el nombre del lugar y las calles que cruzan/colonia donde se ubica este lugar?

-----  
-----

*If Q1025I is equal to 1 then skip to Q1035*

*If not, then skip to instruction before Q1036.*

Q1035. Tú nos dijiste que la última vez que estuviste en contacto cercano con [Response to Q902] fué en un centro comunitario/de reunión grupal. ¿Podrías darnos el nombre del lugar y las calles que cruzan/colonia donde se ubica este lugar?

-----  
-----

*If Q1025J is equal to 1 then skip to Q1036*

*If not, then skip to instruction before Q1037.*

Q1036. Tú nos dijiste que la última vez que estuviste en contacto cercano con [Response to Q902] fué en un parque. ¿Podrías darnos el nombre del lugar y las calles que cruzan/colonia donde se ubica este lugar?

-----  
-----

*If Q1025K is equal to 1 then skip to Q1037*

*If not, then skip to instruction before Q1038.*

Q1037. Tú nos dijiste que la última vez que estuviste en contacto cercano con [Response to Q902] fué en la calle. ¿Podrías darnos el nombre del lugar y las calles que cruzan/colonia donde se ubica este lugar?

-----  
-----

*If Q1025M is equal to 1 then skip to Q1038*

*If not, then skip to instruction before Q1039.*

Q1038. Tú nos dijiste que la última vez que estuviste en contacto cercano con [Response to Q902] fué en un picadero. ¿En qué picadero fué? (Elija Uno)

- 01 Las Palmitas/Zona Norte
- 02 Los Pinos/ Zona Norte
- 03 Las Bombas/ Zona Norte
- 04 Los Aragón/ Zona Norte
- 05 La Veinte/ Bordo, Col. Veinte de Noviembre
- 06 El Azteca/ Cerro Colorado
- 07 Oxxo, Calle 5ta Zona Norte
- 08 Bordo/ Los Álamos, Mundo divertido
- 09 Cañón Guerrero/Maclovio Herrera Colonia Guerrero
- 10 Col. Guaycura (casa privada)
- 11 Col. Presidentes (Infonavit edificio)
- 12 Florido 1era Sección (casa privada)
- 13 Florido 1era Sección (Bomberos, conecta)
- 14 Col. Francisco Villa (edificio abandonado)
- 15 Cañón del Pato/ Colonia Villa
- 16 Col. Postal (casa privada)
- 17 Col. del Río (Parte baja, barranco)
- 18 Sánchez Taboada (Av. Sánchez Taboada y Parque Industrial)
- 19 La cima (casa abandonado)
- 20 Otay módulos
- 21 Otro
- 98 Se rehúsa a contestar

***If Q1038 is equal to 21 then skip to Q1039***

***If not, then skip to instruction before Q1040.***

Q1039. Por favor especifica en qué picadero (e.g. nombre del lugar y calles que cruzan o colonia) fué el último contacto cercano con [Response to Q902].

---

***If Q686 + Q707 + Q728 + Q749 + Q770 + Q791 + Q812 + Q833 + Q854 + Q875 is greater than 3 and Q905 is not equal to "Se rehúsa a contestar" and Q905 is not equal to "Saltó" then skip to Q1040***

***If not, then skip to instruction before Q1083.***

Q1040. ¿Es [Response to Q905] [Response to Q906] ([Response to Q907]) hombre, mujer, transgénero, no-binario u otro? (Elija Uno)

- 1 Hombre
- 2 Mujer
- 3 Mujer Trans
- 4 Hombre Trans
- 5 No-binario/ genero no-binario / género fluido/ agénero
- 6 Otra identidad no en la lista
- 8 Se rehúsa a contestar

***If Q1040 is equal to 6 then skip to Q1041***

***If not, then skip to Q1042.***

Q1041. Por favor especifica la identidad de género de [Response to Q905].

Q1042. ¿Dónde vive [Response to Q905] principalmente? (Elija Uno)

- 1 Mexico
- 2 Estado Unidos
- 3 Otro
- 7 No Sabe
- 8 Se rehúsa a contestar

*If Q1042 is equal to 3 then skip to Q1043*

*If not, then skip to Q1044.*

Q1043. Por favor especifica donde vive principalmente [Response to Q905].

-----

Q1044. ¿Conociste a [Response to Q905] por primera vez en los últimos 14 días?

- 1 Si
- 0 No
- 8 Se rehúsa a contestar

Q1045. ¿Cuántas veces has tenido contacto cercano (dentro de 2 metros) con [Response to Q905] en los últimos 14 días?

- \_\_\_
- 98 Se rehúsa a contestar

Q1046. En promedio, durante los días que viste a [Response to Q905], ¿Cuánto tiempo (e.g. horas, minuto) duraste en contacto cercano con él/ella? Entrevistador: el tiempo máximo por día es 24 horas.

- \_\_\_ HOURS
- \_\_\_ MINUTES
- 98 Se rehúsa a contestar (Hours)

Q1047. ¿Cuándo fue la última vez que tuviste contacto cercano con [Response to Q905] en los últimos 14 días? Entrevistador: Anote cuántos días hace que el/la participante tuvo contacto cercano por última vez con la persona en cuestión. Si la última vez fue hoy, ingresa 0.

— — DÍAS  
 98 Se rehúsa a contestar (Días)

***If Q1045 is greater than 1 then skip to Q1048***

***If not, then skip to Q1049.***

Q1048. Durante el último contacto, ¿Por cuantos días consecutivos viste a [Response to Q905]?

— —  
 98 Se rehúsa a contestar

***MC4FDAY = If(Q1047 is equal to 1, Q1047, If(Q1047 is not equal to 98 and Q1047 is greater than 1, Q1047 + Q1048, "Falta"))***

Q1049. La última vez que viste a [Response to Q905], ¿Qué tipo de contacto tuviste con esta persona? (elija todas las que apliquen) (Marque Todas las que Correspondan)

- Contacto físico, no sexual [e.g. saludo de mano, abrazo, contacto de piel, etc.]
- Contacto físico, sexual
- No físico [e.g. conversación en persona, comer/beber, junta]
- Se rehúsa a contestar

Q1050. Cuando viste a [Response to Q905] durante el contacto, ¿en cual de los siguientes lugares ocurrió? (por favor escoge todas las que apliquen) (Marque Todas las que Correspondan)

- En casa/casa de alguien
- Trabajo
- Restaurante o Café
- Tiempo Libre (i.e. cine, bar, club nocturno)
- Escuela/educación
- Ejercicio o relacionado al estado físico
- Servicio personal (i.e. corte de cabello, masaje)
- Servicio religioso
- Grupo comunitario
- Parque
- Calle
- El Bordo/Canal
- Picadero
- Otro
- Se rehúsa a contestar

***If Q1050N is equal to 1 then skip to Q1051***

***If not, then skip to instruction before Q1052.***

Q1051. Por favor especifica el lugar (e.g. el nombre del lugar y las calles que cruzan o la colonia) donde tuviste contacto cercano con [Response to Q905] por última vez.

-----

***If Q1050A is equal to 1 then skip to Q1052***

***If not, then skip to instruction before Q1053.***

Q1052. Tú nos dijiste que el último contacto cercano con [Response to Q905] fué en tu casa/la casa de alguien más. ¿Dónde se ubica esta casa? ¿Podrías darnos los nombres de las calles que cruzan la intersección más cercana? Entrevistador: Por favor anote los nombres de las calles que lo cruzan. Si el participante no puede darnos esta información, pregúntele el nombre de la colonia y anote esa información.

-----  
-----  
*If Q1050B is equal to 1 then skip to Q1053*

*If not, then skip to instruction before Q1054.*

Q1053. Tú nos dijiste que el último contacto cercano con [Response to Q905] fué en tu trabajo. ¿Nos podrías dar el nombre y la dirección de tu lugar de trabajo? Entrevistador: Si el lugar de trabajo no tiene nombre o dirección, anote cualquier información que se dé para la ubicación (e.g. nombre de calles, intersección más cercana, colonia)

-----  
-----  
*If Q1050C is equal to 1 then skip to Q1054*

*If not, then skip to instruction before Q1055.*

Q1054. Tú nos dijiste que la última vez que estuviste en contacto cercano con [Response to Q905] fué en un restaurante/café. ¿Podrías darnos el nombre de este lugar y las calles que cruzan/colonia donde se ubica este restaurante?

-----  
-----  
*If Q1050D is equal to 1 then skip to Q1055*

*If not, then skip to instruction before Q1056.*

Q1055. Tú nos dijiste que la última vez que estuviste en contacto cercano con [Response to Q905] fué en un lugar de tiempo libre (e.g. teatro, bar, club nocturno). ¿Podrías darnos el nombre del lugar y las calles que cruzan/colonia donde se ubica este lugar?

-----  
-----  
*If Q1050E is equal to 1 then skip to Q1056*

*If not, then skip to instruction before Q1057.*



Q1056. Tú nos dijiste que la última vez que estuviste en contacto cercano con [Response to Q905] fué en tu escuela o lugar de estudio. ¿Podrías darnos el nombre del lugar y las calles que cruzan/colonia donde se ubica este lugar?

-----  
-----

*If Q1050F is equal to 1 then skip to Q1057*

*If not, then skip to instruction before Q1058.*

Q1057. Tú nos dijiste que la última vez que estuviste en contacto cercano con [Response to Q905] fué en un gimnasio/centro fitness. ¿Podrías darnos el nombre del lugar y las calles que cruzan/colonia donde se ubica este lugar?

-----  
-----

*If Q1050G is equal to 1 then skip to Q1058*

*If not, then skip to instruction before Q1059.*

Q1058. Tú nos dijiste que la última vez que estuviste en contacto cercano con [Response to Q905] fué en un lugar donde dan servicios personales (e.g. corte de pelo, masaje). ¿Podrías darnos el nombre del lugar y las calles que cruzan/colonia donde se ubica este lugar?

-----  
-----

*If Q1050H is equal to 1 then skip to Q1059*

*If not, then skip to instruction before Q1060.*

Q1059. Tú nos dijiste que la última vez que estuviste en contacto cercano con [Response to Q905] fué en un lugar de servicio religioso. ¿Podrías darnos el nombre del lugar y las calles que cruzan/colonia donde se ubica este lugar?

-----  
-----

*If Q1050I is equal to 1 then skip to Q1060*

*If not, then skip to instruction before Q1061.*

Q1060. Tú nos dijiste que la última vez que estuviste en contacto cercano con [Response to Q905] fué en un centro comunitario/de reunión grupal. ¿Podrías darnos el nombre del lugar y las calles que cruzan/colonia donde se ubica este lugar?

-----  
-----

*If Q1050J is equal to 1 then skip to Q1061*

*If not, then skip to instruction before Q1062.*

Q1061. Tú nos dijiste que la última vez que estuviste en contacto cercano con [Response to Q905] fué en un parque. ¿Podrías darnos el nombre del lugar y las calles que cruzan/colonia donde se ubica este lugar?

-----  
-----

*If Q1050K is equal to 1 then skip to Q1062*

*If not, then skip to instruction before Q1063.*

Q1062. Tú nos dijiste que la última vez que estuviste en contacto cercano con [Response to Q905] fué en la calle. ¿Podrías darnos el nombre del lugar y las calles que cruzan/colonia donde se ubica este lugar?

-----  
-----

*If Q1050M is equal to 1 then skip to Q1063*

*If not, then skip to instruction before Q1064.*

Q1063. Tú nos dijiste que la última vez que estuviste en contacto cercano con [Response to Q905] fué en un picadero. ¿En qué picadero fué? (Elija Uno)

- 01 Las Palmitas/Zona Norte
- 02 Los Pinos/ Zona Norte
- 03 Las Bombas/ Zona Norte
- 04 Los Aragón/ Zona Norte
- 05 La Veinte/ Bordo, Col. Veinte de Noviembre
- 06 El Azteca/ Cerro Colorado
- 07 Oxxo, Calle 5ta Zona Norte
- 08 Bordo/ Los Álamos, Mundo divertido
- 09 Cañón Guerrero/Maclovio Herrera Colonia Guerrero
- 10 Col. Guaycura (casa privada)
- 11 Col. Presidentes (Infonavit edificio)
- 12 Florido 1era Sección (casa privada)
- 13 Florido 1era Sección (Bomberos, conecta)
- 14 Col. Francisco Villa (edificio abandonado)
- 15 Cañón del Pato/ Colonia Villa
- 16 Col. Postal (casa privada)
- 17 Col. del Río (Parte baja, barranco)
- 18 Sánchez Taboada (Av. Sánchez Taboada y Parque Industrial)
- 19 La cima (casa abandonado)
- 20 Otay módulos
- 21 Other
- 98 Se rehúsa a contestar

**If Q1063 is equal to 21 then skip to Q1064**

**If not, then skip to instruction before Q1065.**

Q1064. Por favor especifica en qué picadero (e.g. nombre del lugar y calles que cruzan o colonia) fué el último contacto cercano con [Response to Q905].

-----

**If Q1045 is greater than 1 then skip to Q1065**

**If not, then skip to instruction before Q1083.**

Q1065. Por favor piensa en alguna otra vez que tuviste contacto cercano con [Response to Q905] en los últimos 14 días, aparte del contacto cercano que nos acaba de describir con la persona en cuestión. Cuando decimos alguna otra vez, queremos decir un contacto en el tu viste a [Response to Q905] en persona y luego se separaron, ¿Cuántos días hace que se vieron?

|         |                              |
|---------|------------------------------|
| ___ ___ | DÍAS                         |
| 98      | Se rehúsa a contestar (Días) |

**If Q1065 is less than MC4FDAY then READ: "Este tiempo es más reciente que el tiempo que Ud. indicó que tuvo el último contacto. Por favor realice las correcciones necesarias. TRANSLATION" and skip to Q1065.**

**If Q1045 is greater than 1 then skip to Q1066**

**If not, then skip to Q1067.**

Q1066. Durante este contacto, ¿Cuántos días consecutivos viste a [Response to Q905]?

|         |                       |
|---------|-----------------------|
| ___ ___ |                       |
| 98      | Se rehúsa a contestar |

Q1067. Cuándo viste a [Response to Q905] en esa ocasión, ¿qué tipo de contacto tuviste con él/ella? (Elije todas las que apliquen) (Marque Todas las que Correspondan)

- \_\_\_ Contacto físico, no sexual [e.g. saludo de mano, abrazo, contacto de piel, etc.]
- \_\_\_ Contacto físico, sexual
- \_\_\_ No físico [e.g. conversación en persona, comer/beber, junta]
- \_\_\_ Se rehúsa a contestar

Q1068. Cuándo viste a [Response to Q905] en esa ocasión, ¿en cuál de los siguientes lugares fue que tuvieron contacto cercano? (elige todas las que apliquen) (Marque Todas las que Correspondan)

- En casa/casa de alguien
- Trabajo
- Restaurante o Café
- Tiempo Libre (i.e. cine, bar, club nocturno)
- Escuela/educación
- Ejercicio o relacionado al estado físico
- Servicio personal (i.e. corte de cabello, masaje)
- Servicio religioso
- Grupo comunitario
- Parque
- Calle
- El Bordo/Canal
- Picadero
- Otro
- Se rehúsa a contestar

***If Q1068N is equal to 1 then skip to Q1069***

***If not, then skip to instruction before Q1070.***

Q1069. Por favor especifica el lugar (e.g. nombre del lugar y las calles que cruzan o la colonia) donde fué ese contacto cercano con [Response to Q905].

-----

***If Q1068A is equal to 1 then skip to Q1070***

***If not, then skip to instruction before Q1071.***

Q1070. Tú nos dijiste que el último contacto cercano con [Response to Q905] fué en tu casa/la casa de alguien más. ¿Dónde se ubica esta casa? ¿Podrías darnos los nombres de las calles que cruzan la intersección más cercana? Entrevistador: Por favor anote los nombres de las calles que cruzan. Si el participante no puede darnos esta información, pregúntele el nombre de la colonia y anote esa información.

-----  
-----  
*If Q1068B is equal to 1 then skip to Q1071*

*If not, then skip to instruction before Q1072.*

Q1071. Tú nos dijiste que el último contacto cercano con [Response to Q905] fué en tu trabajo. ¿Nos podrías dar el nombre y la dirección de tu lugar de trabajo? Entrevistador: Si el lugar de trabajo no tiene nombre o dirección, anote cualquier información que se dé para la ubicación (e.g. nombre de calles, intersección más cercana, colonia)

-----  
-----  
*If Q1068C is equal to 1 then skip to Q1072*

*If not, then skip to instruction before Q1073.*

Q1072. Tú nos dijiste que la última vez que estuviste en contacto cercano con [Response to Q905] fué en un restaurante/café. ¿Podrías darnos el nombre de este lugar y las calles que cruzan/colonia donde se ubica este restaurante?

-----  
-----  
*If Q1068D is equal to 1 then skip to Q1073*

*If not, then skip to instruction before Q1074.*

Q1073. Tú nos dijiste que la última vez que estuviste en contacto cercano con [Response to Q905] fué en un lugar de tiempo libre (e.g. teatro, bar, club nocturno). ¿Podrías darnos el nombre del lugar y las calles que cruzan/colonia donde se ubica este lugar?

-----  
-----  
*If Q1068E is equal to 1 then skip to Q1074*

*If not, then skip to instruction before Q1075.*

Q1074. Tú nos dijiste que la última vez que estuviste en contacto cercano con [Response to Q905] fué en tu escuela o lugar de estudio. ¿Podrías darnos el nombre del lugar y las calles que cruzan/colonia donde se ubica este lugar?

-----  
-----

*If Q1068F is equal to 1 then skip to Q1075*

*If not, then skip to instruction before Q1076.*

Q1075. Tú nos dijiste que la última vez que estuviste en contacto cercano con [Response to Q905] fué en un gimnasio/centro fitness. ¿Podrías darnos el nombre del lugar y las calles que cruzan/colonia donde se ubica este lugar?

-----  
-----

*If Q1068G is equal to 1 then skip to Q1076*

*If not, then skip to instruction before Q1077.*

Q1076. Tú nos dijiste que la última vez que estuviste en contacto cercano con [Response to Q905] fué en un lugar donde dan servicios personales (e.g. corte de pelo, masaje). ¿Podrías darnos el nombre del lugar y las calles que cruzan/colonia donde se ubica este lugar?

-----  
-----

*If Q1068H is equal to 1 then skip to Q1077*

*If not, then skip to instruction before Q1078.*

Q1077. Tú nos dijiste que la última vez que estuviste en contacto cercano con [Response to Q905] fué en un lugar de servicio religioso. ¿Podrías darnos el nombre del lugar y las calles que cruzan/colonia donde se ubica este lugar?

-----  
-----

*If Q1068I is equal to 1 then skip to Q1078*

*If not, then skip to instruction before Q1079.*

Q1078. Tú nos dijiste que la última vez que estuviste en contacto cercano con [Response to Q905] ocurrió en un centro comunitario/de reunión grupal. ¿Podrías darnos el nombre del lugar y las calles que cruzan/colonia donde se ubica este lugar?

-----  
-----

*If Q1068J is equal to 1 then skip to Q1079*

*If not, then skip to instruction before Q1080.*

Q1079. Tú nos dijiste que la última vez que estuviste en contacto cercano con [Response to Q905] fué en un parque. ¿Podrías darnos el nombre del lugar y las calles que cruzan/colonia donde se ubica este lugar?

-----  
-----

*If Q1068K is equal to 1 then skip to Q1080*

*If not, then skip to instruction before Q1081.*

Q1080. Tú nos dijiste que la última vez que estuviste en contacto cercano con [Response to Q905] fué en la calle. ¿Podrías darnos el nombre del lugar y las calles que cruzan/colonia donde se ubica este lugar?

-----  
-----

*If Q1068M is equal to 1 then skip to Q1081*

*If not, then skip to instruction before Q1082.*



Q1081. Tú nos dijiste que la última vez que estuviste en contacto cercano con [Response to Q905] fué en un picadero. ¿En qué picadero fué? (Elija Uno)

- 01 Las Palmitas/Zona Norte
- 02 Los Pinos/ Zona Norte
- 03 Las Bombas/ Zona Norte
- 04 Los Aragón/ Zona Norte
- 05 La Veinte/ Bordo, Col. Veinte de Noviembre
- 06 El Azteca/ Cerro Colorado
- 07 Oxxo, Calle 5ta Zona Norte
- 08 Bordo/ Los Álamos, Mundo divertido
- 09 Cañón Guerrero/Maclovio Herrera Colonia Guerrero
- 10 Col. Guaycura (casa privada)
- 11 Col. Presidentes (Infonavit edificio)
- 12 Florido 1era Sección (casa privada)
- 13 Florido 1era Sección (Bomberos, conecta)
- 14 Col. Francisco Villa (edificio abandonado)
- 15 Cañón del Pato/ Colonia Villa
- 16 Col. Postal (casa privada)
- 17 Col. del Río (Parte baja, barranco)
- 18 Sánchez Taboada (Av. Sánchez Taboada y Parque Industrial)
- 19 La cima (casa abandonado)
- 20 Otay módulos
- 21 Otro
- 98 Se rehúsa a contestar

***If Q1081 is equal to 21 then skip to Q1082***

***If not, then skip to instruction before Q1083.***

Q1082. Por favor especifica en qué picadero (e.g. nombre del lugar y calles que cruzan o colonia) fué el último contacto cercano con [Response to Q905].

---

***If Q686 + Q707 + Q728 + Q749 + Q770 + Q791 + Q812 + Q833 + Q854 + Q875 is greater than 4 and Q908 is not equal to "Se rehúsa a contestar" and Q908 is not equal to "Saltó" then skip to Q1083***

***If not, then skip to instruction before Q1126.***

Q1083. ¿Es [Response to Q908] [MCL5] ([MCN5]) hombre, mujer, transgénero, no-binario u otro? (Elija Uno)

- 1 Hombre
- 2 Mujer
- 3 Mujer Trans
- 4 Hombre Trans
- 5 No-binario/ genero no-binario / género fluido/ agénero
- 6 Otra identidad no en la lista
- 8 Se rehúsa a contestar

***If Q1083 is equal to 6 then skip to Q1084***

***If not, then skip to Q1085.***

Q1084. Por favor especifica la identidad de género de [Response to Q908].

---

Q1085. ¿Dónde vive [Response to Q908] principalmente? (Elija Uno)

- 1 Mexico
- 2 Estados Unidos
- 3 Otro
- 7 No Sabe
- 8 Se rehúsa a contestar

*If Q1085 is equal to 3 then skip to Q1086*

*If not, then skip to Q1087.*

Q1086. Por favor especifica donde vive principalmente [Response to Q908].

-----

Q1087. ¿Conociste a [Response to Q908] por primera vez en los últimos 14 días?

- 1 Si
- 0 No
- 8 Se rehúsa a contestar

Q1088. ¿Cuántas veces has tenido contacto cercano (dentro de 2 metros) con [Response to Q908] en los últimos 14 días?

- \_\_\_
- 98 Se rehúsa a contestar

Q1089. En promedio, durante los días que viste a [Response to Q908], ¿Cuánto tiempo (e.g. horas, minuto) duraste en contacto cercano con él/ella? Entrevistador: el tiempo máximo por día es 24 horas.

- \_\_\_ HOURS
- \_\_\_ MINUTES
- 98 Se rehúsa a contestar (Hours)

Q1090. ¿Cuándo fue la última vez que tuviste contacto cercano con [Response to Q908] en los últimos 14 días? Entrevistador: Anote cuántos días hace que el/la participante tuvo contacto cercano por última vez con la persona en cuestión. Si la última vez fue hoy, ingresa 0.

— — DÍAS  
 98 Se rehúsa a contestar (Días)

***If Q1088 is greater than 1 then skip to Q1091***

***If not, then skip to Q1092.***

Q1091. Durante el último contacto, ¿Por cuantos días consecutivos viste a [Response to Q908]?

— —  
 98 Se rehúsa a contestar

***MC5FDAY = If(Q1090 is equal to 1, Q1090, If(Q1090 is not equal to 98 and Q1090 is greater than 1, Q1090 + Q1091, "Falta"))***

Q1092. La última vez que viste a [Response to Q908], ¿Qué tipo de contacto tuviste con esta persona? (elija todas las que apliquen) (Marque Todas las que Correspondan)

- Contacto físico, no sexual [e.g. saludo de mano, abrazo, contacto de piel, etc.]
- Contacto físico, sexual
- No físico [e.g. conversación en persona, comer/beber, junta]
- Se rehúsa a contestar

Q1093. Cuando viste a [Response to Q908] durante el contacto, ¿en cual de los siguientes lugares ocurrió? (por favor escoge todas las que apliquen) (Marque Todas las que Correspondan)

- En casa/casa de alguien
- Trabajo
- Restaurante o Café
- Tiempo Libre (i.e. cine, bar, club nocturno)
- Escuela/educación
- Ejercicio o relacionado al estado físico
- Servicio personal (i.e. corte de cabello, masaje)
- Servicio religioso
- Grupo comunitario
- Parque
- Calle
- El Bordo/Canal
- Picadero
- Otro
- Se rehúsa a contestar

***If Q1093N is equal to 1 then skip to Q1094***

***If not, then skip to instruction before Q1095.***

Q1094. Por favor especifica el lugar (e.g. el nombre del lugar y las calles que cruzan o la colonia) donde tuviste contacto cercano con [Response to Q908] por última vez.

-----

***If Q1093A is equal to 1 then skip to Q1095***

***If not, then skip to instruction before Q1096.***

Q1095. Tú nos dijiste que el último contacto cercano con [Response to Q908] fué en tu casa/la casa de alguien más. ¿Dónde se ubica esta casa? ¿Podrías darnos los nombres de las calles que cruzan la intersección más cercana? Entrevistador: Por favor anote los nombres de las calles que cruzan. Si el participante no puede darnos esta información, pregúntele el nombre de la colonia y anote esa información.

-----  
-----  
*If Q1093B is equal to 1 then skip to Q1096*

*If not, then skip to instruction before Q1097.*

Q1096. Tú nos dijiste que el último contacto cercano con [Response to Q908] ocurrió en tu trabajo. ¿Nos podrías dar el nombre y la dirección de tu lugar de trabajo? Entrevistador: Si el lugar de trabajo no tiene nombre o dirección, anote cualquier información que se dé para la ubicación (e.g. nombre de calles, intersección más cercana, colonia)

-----  
-----  
*If Q1093C is equal to 1 then skip to Q1097*

*If not, then skip to instruction before Q1098.*

Q1097. Tú nos dijiste que la última vez que estuviste en contacto cercano con [Response to Q908] fué en un restaurante/café. ¿Podrías darnos el nombre de este lugar y las calles que cruzan/colonia donde se ubica este restaurante?

-----  
-----  
*If Q1093D is equal to 1 then skip to Q1098*

*If not, then skip to instruction before Q1099.*

Q1098. Tú nos dijiste que la última vez que estuviste en contacto cercano con [Response to Q908] fué en un lugar de tiempo libre (e.g. teatro, bar, club nocturno). ¿Podrías darnos el nombre del lugar y las calles que cruzan/colonia donde se ubica este lugar?

-----  
-----  
*If Q1093E is equal to 1 then skip to Q1099*

*If not, then skip to instruction before Q1100.*

Q1099. Tú nos dijiste que la última vez que estuviste en contacto cercano con [Response to Q908] fué en tu escuela o lugar de estudio. ¿Podrías darnos el nombre del lugar y las calles que cruzan/colonia donde se ubica este lugar?

-----  
-----

*If Q1093F is equal to 1 then skip to Q1100*

*If not, then skip to instruction before Q1101.*

Q1100. Tú nos dijiste que la última vez que estuviste en contacto cercano con [Response to Q908] fué en un gimnasio/centro fitness. ¿Podrías darnos el nombre del lugar y las calles que cruzan/colonia donde se ubica este lugar?

-----  
-----

*If Q1093G is equal to 1 then skip to Q1101*

*If not, then skip to instruction before Q1102.*

Q1101. Tú nos dijiste que la última vez que estuviste en contacto cercano con [Response to Q908] fué en un lugar donde dan servicios personales (e.g. corte de pelo, masaje). ¿Podrías darnos el nombre del lugar y las calles que cruzan/colonia donde se ubica este lugar?

-----  
-----

*If Q1093H is equal to 1 then skip to Q1102*

*If not, then skip to instruction before Q1103.*

Q1102. Tú nos dijiste que la última vez que estuviste en contacto cercano con [Response to Q908] fué en un lugar de servicio religioso. ¿Podrías darnos el nombre del lugar y las calles que cruzan/colonia donde se ubica este lugar?

-----  
-----

*If Q1093I is equal to 1 then skip to Q1103*

*If not, then skip to instruction before Q1104.*

Q1103. Tú nos dijiste que la última vez que estuviste en contacto cercano con [Response to Q908] fué en un centro comunitario/de reunión grupal. ¿Podrías darnos el nombre del lugar y las calles que cruzan/colonia donde se ubica este lugar?

-----  
-----

*If Q1093J is equal to 1 then skip to Q1104*

*If not, then skip to instruction before Q1105.*

Q1104. Tú nos dijiste que la última vez que estuviste en contacto cercano con [Response to Q908] fué en un parque. ¿Podrías darnos el nombre del lugar y las calles que cruzan/colonia donde se ubica este lugar?

-----  
-----

*If Q1093K is equal to 1 then skip to Q1105*

*If not, then skip to instruction before Q1106.*

Q1105. Tú nos dijiste que la última vez que estuviste en contacto cercano con [Response to Q908] fué en la calle. ¿Podrías darnos el nombre del lugar y las calles que cruzan/colonia donde se ubica este lugar?

-----  
-----

*If Q1093M is equal to 1 then skip to Q1106*

*If not, then skip to instruction before Q1107.*



Q1106. Tú nos dijiste que la última vez que estuviste en contacto cercano con [Response to Q908] fué en un picadero. ¿En qué picadero fué? (Elija Uno)

- 01 Las Palmitas/Zona Norte
- 02 Los Pinos/ Zona Norte
- 03 Las Bombas/ Zona Norte
- 04 Los Aragón/ Zona Norte
- 05 La Veinte/ Bordo, Col. Veinte de Noviembre
- 06 El Azteca/ Cerro Colorado
- 07 Oxxo, Calle 5ta Zona Norte
- 08 Bordo/ Los Álamos, Mundo divertido
- 09 Cañón Guerrero/Maclovio Herrera Colonia Guerrero
- 10 Col. Guaycura (casa privada)
- 11 Col. Presidentes (Infonavit edificio)
- 12 Florido 1era Sección (casa privada)
- 13 Florido 1era Sección (Bomberos, conecta)
- 14 Col. Francisco Villa (edificio abandonado)
- 15 Cañón del Pato/ Colonia Villa
- 16 Col. Postal (casa privada)
- 17 Col. del Río (Parte baja, barranco)
- 18 Sánchez Taboada (Av. Sánchez Taboada y Parque Industrial)
- 19 La cima (casa abandonado)
- 20 Otay módulos
- 21 Otro
- 98 Se rehúsa a contestar

***If Q1106 is equal to 21 then skip to Q1107***

***If not, then skip to instruction before Q1108.***

Q1107. Por favor especifica en qué picadero (e.g. nombre del lugar y calles que cruzan o colonia) fué el último contacto cercano con [Response to Q908].

-----

***If Q1088 is greater than 1 then skip to Q1108***

***If not, then skip to instruction before Q1126.***

Q1108. Por favor piensa en alguna otra vez que tuviste contacto cercano con [Response to Q908] en los últimos 14 días, aparte del contacto cercano que nos acaba de describir con la persona en cuestión. Cuando decimos alguna otra vez, queremos decir un contacto en el tu viste a [Response to Q908] en persona y luego se separaron, ¿Cuántos días hace que se vieron?

\_\_\_ \_\_\_ DÍAS  
 98 Se rehúsa a contestar (Días)

***If Q1108 is less than MC5FDAY then READ: "Este tiempo es más reciente que el tiempo que Ud. indicó que tuvo el último contacto. Por favor realice las correcciones necesarias. TRANSLATION" and skip to Q1108.***

***If Q1088 is greater than 1 then skip to Q1109***

***If not, then skip to Q1110.***

Q1109. Durante este contacto, ¿Cuántos días consecutivos viste a [Response to Q908]?

\_\_\_ \_\_\_  
 98 Se rehúsa a contestar

Q1110. Cuándo viste a [Response to Q908] en esa ocasión, ¿qué tipo de contacto tuviste con él/ella? (Elije todas las que apliquen) (Marque Todas las que Correspondan)

- \_\_\_ Contacto físico, no sexual [e.g. saludo de mano, abrazo, contacto de piel, etc.]
- \_\_\_ Contacto físico, sexual
- \_\_\_ No físico [e.g. conversación en persona, comer/beber, junta]
- \_\_\_ Se rehúsa a contestar

Q1111. Cuándo viste a [Response to Q908] en esa ocasión, ¿en cuál de los siguientes lugares fue que tuvieron contacto cercano? (elige todas las que apliquen) (Marque Todas las que Correspondan)

- En casa/casa de alguien
- Trabajo
- Restaurante o Café
- Tiempo Libre (i.e. cine, bar, club nocturno)
- Escuela/educación
- Ejercicio o relacionado al estado físico
- Servicio personal (i.e. corte de cabello, masaje)
- Servicio religioso
- Grupo comunitario
- Parque
- Calle
- El Bordo/Canal
- Picadero
- Otro
- Se rehúsa a contestar

***If Q1111N is equal to 1 then skip to Q1112***

***If not, then skip to instruction before Q1113.***

Q1112. Por favor especifica el lugar (e.g. nombre del lugar y las calles que cruzan o la colonia) donde fué ese contacto cercano con [Response to Q908].

-----

***If Q1111A is equal to 1 then skip to Q1113***

***If not, then skip to instruction before Q1114.***

Q1113. Tú nos dijiste que el último contacto cercano con [Response to Q908] ocurrió en tu casa/casa de alguien más. ¿Dónde se ubica esta casa? ¿Podrías proveer los nombres de las calles que cruzan la intersección más cercana? Entrevistador: Por favor anote los nombres de las calles que cruzan. Si el participante no puede darnos esta información, pregúntele el nombre de la colonia e ingresar esa información.

-----  
-----  
*If Q1111B is equal to 1 then skip to Q1114*

*If not, then skip to instruction before Q1115.*

Q1114. Tú nos dijiste que el último contacto cercano con [Response to Q908] ocurrió en tu trabajo. ¿Nos podrías dar el nombre y la dirección de tu lugar de trabajo? Entrevistador: Si el lugar de trabajo no tiene nombre o dirección, anote cualquier información que se dé para la ubicación (e.g. nombre de calles, intersección más cercana, colonia)

-----  
-----  
*If Q1111C is equal to 1 then skip to Q1115*

*If not, then skip to instruction before Q1116.*

Q1115. Tú nos dijiste que la última vez que estuviste en contacto cercano con [Response to Q908] fué en un restaurante/café. ¿Podrías darnos el nombre de este lugar y las calles que cruzan/colonia donde se ubica este restaurante?

-----  
-----  
*If Q1111D is equal to 1 then skip to Q1116*

*If not, then skip to instruction before Q1117.*

Q1116. Tú nos dijiste que la última vez que estuviste en contacto cercano con [Response to Q908] fué en un lugar de tiempo libre (e.g. teatro, bar, club nocturno). ¿Podrías darnos el nombre del lugar y las calles que cruzan/colonia donde se ubica este lugar?

-----  
-----  
*If Q1111E is equal to 1 then skip to Q1117*

*If not, then skip to instruction before Q1118.*

Q1117. Tú nos dijiste que la última vez que estuviste en contacto cercano con [Response to Q908] fué en tu escuela o lugar de estudio. ¿Podrías darnos el nombre del lugar y las calles que cruzan/colonia donde se ubica este lugar?

-----  
-----

***If Q1111F is equal to 1 then skip to Q1118***

***If not, then skip to instruction before Q1119.***

Q1118. Tú nos dijiste que la última vez que estuviste en contacto cercano con [Response to Q908] ocurrió en un gimnasio/centro fitness. ¿Podrías darnos el nombre del lugar y las calles que cruzan/colonia donde se ubica este lugar?

-----  
-----

***If Q1111G is equal to 1 then skip to Q1119***

***If not, then skip to instruction before Q1120.***

Q1119. Tú nos dijiste que la última vez que estuviste en contacto cercano con [Response to Q908] fué en un lugar donde proveen servicios personales (e.g. corte de pelo, masaje). ¿Podrías darnos el nombre del lugar y las calles que cruzan/colonia donde se ubica este lugar?

-----  
-----

***If Q1111H is equal to 1 then skip to Q1120***

***If not, then skip to instruction before Q1121.***

Q1120. Tú nos dijiste que la última vez que estuviste en contacto cercano con [Response to Q908] fué en un lugar de servicio religioso. ¿Podrías darnos el nombre del lugar y las calles que cruzan/colonia donde se ubica este lugar?

-----  
-----

***If Q1111I is equal to 1 then skip to Q1121***

***If not, then skip to instruction before Q1122.***

Q1121. Tú nos dijiste que la última vez que estuviste en contacto cercano con [Response to Q908] fué en un centro comunitario/de reunión grupal. ¿Podrías darnos el nombre del lugar y las calles que cruzan/colonia donde se ubica este lugar?

-----  
-----

*If Q1111J is equal to 1 then skip to Q1122*

*If not, then skip to instruction before Q1123.*

Q1122. Tú nos dijiste que la última vez que estuviste en contacto cercano con [Response to Q908] fué en un parque. ¿Podrías darnos el nombre del lugar y las calles que cruzan/colonia donde se ubica este lugar?

-----  
-----

*If Q1111K is equal to 1 then skip to Q1123*

*If not, then skip to instruction before Q1124.*

Q1123. Tú nos dijiste que la última vez que estuviste en contacto cercano con [Response to Q908] fué en la calle. ¿Podrías darnos el nombre del lugar y las calles que cruzan/colonia donde se ubica este lugar?

-----  
-----

*If Q1111M is equal to 1 then skip to Q1124*

*If not, then skip to instruction before Q1125.*

Q1124. Tú nos dijiste que la última vez que estuviste en contacto cercano con [Response to Q908] fué en un picadero. ¿En qué picadero fué? (Elija Uno)

- 01 Las Palmitas/Zona Norte
- 02 Los Pinos/ Zona Norte
- 03 Las Bombas/ Zona Norte
- 04 Los Aragón/ Zona Norte
- 05 La Veinte/ Bordo, Col. Veinte de Noviembre
- 06 El Azteca/ Cerro Colorado
- 07 Oxxo, Calle 5ta Zona Norte
- 08 Bordo/ Los Álamos, Mundo divertido
- 09 Cañón Guerrero/Maclovio Herrera Colonia Guerrero
- 10 Col. Guaycura (casa privada)
- 11 Col. Presidentes (Infonavit edificio)
- 12 Florido 1era Sección (casa privada)
- 13 Florido 1era Sección (Bomberos, conecta)
- 14 Col. Francisco Villa (edificio abandonado)
- 15 Cañón del Pato/ Colonia Villa
- 16 Col. Postal (casa privada)
- 17 Col. del Río (Parte baja, barranco)
- 18 Sánchez Taboada (Av. Sánchez Taboada y Parque Industrial)
- 19 La cima (casa abandonado)
- 20 Otay módulos
- 21 Otro
- 98 Se rehúsa a contestar

*If Q1124 is equal to 21 then skip to Q1125*

*If not, then skip to instruction before Q1126.*

Q1125. Por favor especifica en qué picadero (e.g. nombre del lugar y calles que cruzan o colonia) fué el último contacto cercano con [Response to Q908].

-----

**READ:** *Ahora te preguntaremos sobre cambios potenciales en los comportamientos de contacto relacionados al SARSCoV-2.*

*Intenta pensar un poco más allá al tiempo antes de que estuviéramos conscientes de la nueva epidemia de coronavirus.*

Q1126. ¿Cuántos amigos o personas con las que tú te asociaste, con quien tú hablaste sobre cosas que eran importantes para ti ya no puedes ver por la pandemia?

-----

998 Se rehúsa a contestar

*If Q1126 is greater than 0 and Q1126 is not equal to 998 then skip to Q1127*

*If not, then skip to instruction before Q1135.*

Q1127. **De las personas que ya no puedes ver, cuántas de ellas eran:** Parejas Sexuales

-----

998 Se rehúsa a contestar

*If Q1127 is not equal to 998 and Q1127 is greater than Q1126 then READ: "Este número es más grande que el número total. Por favor realice las correcciones necesarias." and skip to Q1127.*

*If Q1127 is not equal to 998 and Q1126 is greater than Q1127 then skip to Q1128*

*If not, then skip to instruction before Q1129.*

Q1128. **De las personas que ya no puedes ver, cuántas de ellas eran:** amigos

-----

998 Se rehúsa a contestar



*If Q1128 is not equal to 998 and Q1127 is not equal to 998 and Q1128 is greater than Q1126 - Q1127 then READ: "Este número es más grande que el número total. Por favor realice las correcciones necesarias." and skip to Q1128.*

*If Q1127 is not equal to 998 and Q1128 is not equal to 998 and Q1126 is greater than Q1127 + Q1128 then skip to Q1129*

*If not, then skip to instruction before Q1130.*

Q1129. **De las personas que ya no puedes ver, cuántas de ellas eran:** Vecinos o compañeros de casa

— — —

998 Se rehúsa a contestar

*If Q1129 is not equal to 998 and Q1127 is not equal to 998 and Q1128 is not equal to 998 and Q1129 is greater than Q1126 - Q1127 - Q1128 then READ: "Este número es más grande que el número total. Por favor realice las correcciones necesarias." and skip to Q1129.*

*If Q1127 is not equal to 998 and Q1128 is not equal to 998 and Q1129 is not equal to 998 and Q1126 is greater than Q1127 + Q1128 + Q1129 then skip to Q1130*

*If not, then skip to instruction before Q1131.*

Q1130. **De las personas que ya no puedes ver, cuántas de ellas eran:** Compañeros de trabajo o jefes

— — —

998 Se rehúsa a contestar

*If Q1130 is not equal to 998 and Q1127 is not equal to 998 and Q1128 is not equal to 998 and Q1129 is not equal to 998 and Q1130 is greater than Q1126 - Q1127 - Q1128 - Q1129 then READ: "Este número es más grande que el número total. Por favor realice las correcciones necesarias." and skip to Q1130.*

*If Q1127 is not equal to 998 and Q1128 is not equal to 998 and Q1129 is not equal to 998 and Q1130 is not equal to 998 and Q1126 is greater than Q1127 + Q1128 + Q1129 + Q1130 then skip to Q1131*

*If not, then skip to instruction before Q1132.*

Q1131. **De las personas que ya no puedes ver, cuántas de ellas eran:** Familia- familiares por sangre o matrimonio

— — —  
998 Se rehúsa a contestar

*If Q1131 is not equal to 998 and Q1130 is not equal to 998 and Q1127 is not equal to 998 and Q1128 is not equal to 998 and Q1129 is not equal to 998 and Q1131 is greater than Q1126 - Q1127 - Q1128 - Q1129 - Q1130 then READ: "Este número es más grande que el número total. Por favor realice las correcciones necesarias." and skip to Q1131.*

*If Q1127 is not equal to 998 and Q1128 is not equal to 998 and Q1129 is not equal to 998 and Q1130 is not equal to 998 and Q1131 is not equal to 998 and Q1126 is greater than Q1127 + Q1128 + Q1129 + Q1130 + Q1131 then skip to Q1132*

*If not, then skip to instruction before Q1133.*

Q1132. **De las personas que ya no puedes ver, cuántas de ellas eran:** Relacionadas a las drogas o alcohol

— — —  
998 Se rehúsa a contestar

*If Q1132 is not equal to 998 and Q1131 is not equal to 998 and Q1130 is not equal to 998 and Q1127 is not equal to 998 and Q1128 is not equal to 998 and Q1129 is not equal to 998 and Q1132 is greater than Q1126 - Q1127 - Q1128 - Q1129 - Q1130 - Q1131 then READ: "Este número es más grande que el número total. Por favor realice las correcciones necesarias." and skip to Q1132.*

*If Q1127 is not equal to 998 and Q1128 is not equal to 998 and Q1129 is not equal to 998 and Q1130 is not equal to 998 and Q1131 is not equal to 998 and Q1132 is not equal to 998 and Q1126 is greater than Q1127 + Q1128 + Q1129 + Q1130 + Q1131 + Q1132 then skip to Q1133*

*If not, then skip to instruction before Q1134.*

Q1133. **De las personas que ya no puedes ver, cuántas de ellas eran:** Otra relación (especifica)

— — —  
998 Se rehúsa a contestar

*If Q1133 is not equal to 998 and Q1132 is not equal to 998 and Q1131 is not equal to 998 and Q1130 is not equal to 998 and Q1127 is not equal to 998 and Q1128 is not equal to 998 and Q1129 is not equal to 998 and Q1133 is greater than Q1126 - Q1127 - Q1128 - Q1129 - Q1130 - Q1131 - Q1132 then READ: "Este número es más grande que el número total. Por favor realice las correcciones necesarias." and skip to Q1133.*

*If Q1133 is greater than 0 then skip to Q1134*

*If not, then skip to instruction before Q1135.*

Q1134. Por favor, especifica qué otra relación.

-----

*READ: Ahora, intenta recordar las primeras dos semanas de Febrero 2020 (o un periodo típico de 14 días en 2020 antes de que estuviéramos conscientes de la nueva pandemia de coronavirus).*

Q1135. **¿Normalmente con cuántas personas tenías contacto cercano en el transcurso de esos 14 días?** Recuerda, estamos interesados en las personas con las que tu has tenido:

Contacto no físico (con 2 metros de distancia) que duró **más de una hora**

O

Contacto físico

Por favor agrega el número de contactos en cada categoría. De nuevo, puedes fijarte tranquilamente en tu teléfono o calendario para recordar mejor

-----

998 Se rehúsa a contestar

*If Q1135 is greater than 0 and Q1135 is not equal to 998 then skip to Q1136*

*If not, then skip to Q1150.*

Q1136. **¿Cuántos de estos contactos cercanos estuvieron...Viviendo en Estados Unidos?**

-----

997 No Sabe

998 Se rehúsa a contestar

*If Q1136 is not equal to 997 and Q1136 is not equal to 998 and Q1136 is greater than Q1135 then READ: "Este número es más grande que el número total. Por favor realice las correcciones necesarias." and skip to Q1136.*

*If Q1135 is greater than Q1136 then skip to Q1137*

*If not, then skip to instruction before Q1138.*

Q1137. **¿Cuántos de estos contactos cercanos estuvieron...Viviendo en México?**

— — —

997 No Sabe

998 Se rehúsa a contestar

*If Q1136 is not equal to 997 and Q1136 is not equal to 998 and Q1137 is not equal to 997 and Q1137 is not equal to 998 and Q1137 is greater than Q1135 - Q1136 then READ: "Este número es más grande que el número total. Por favor realice las correcciones necesarias." and skip to Q1137.*

Q1138. **¿Cuántos de estos contactos cercanos fueron... Hombres?**

— — —

998 Se rehúsa a contestar

*If Q1138 is not equal to 998 and Q1138 is greater than Q1135 then READ: "Este número es más grande que el número total. Por favor realice las correcciones necesarias." and skip to Q1138.*

*If Q1135 is greater than Q1138 then skip to Q1139*

*If not, then skip to instruction before Q1140.*

Q1139. **¿Cuántos de estos contactos cercanos fueron... Mujer?**

— — —

997 No Sabe

998 Se rehúsa a contestar

*If Q1138 is not equal to 998 and Q1139 is not equal to 998 and Q1139 is greater than Q1135 - Q1138 then READ: "Este número es más grande que el número total. Por favor realice las correcciones necesarias." and skip to Q1139.*

*If Q1135 is greater than Q1138 + Q1139 then skip to Q1140*

*If not, then skip to instruction before Q1141.*

Q1140. **¿Cuántos de estos contactos cercanos fueron...** Hombre Transgénero?

— — —  
997 No Sabe

998 Se rehúsa a contestar

*If Q1140 is not equal to 998 and Q1140 is greater than Q1135 then READ: "Este número es más grande que el número total. Por favor realice las correcciones necesarias." and skip to Q1140.*

*If Q1135 is greater than Q1138 + Q1139 + Q1140 then skip to Q1141*

*If not, then skip to instruction before Q1142.*

Q1141. **¿Cuántos de estos contactos cercanos fueron...** Mujer Transgénero?

— — —  
997 No Sabe

998 Se rehúsa a contestar

*If Q1140 is not equal to 998 and Q1141 is not equal to 998 and Q1141 is greater than Q1135 - Q1140 then READ: "Este número es más grande que el número total. Por favor realice las correcciones necesarias." and skip to Q1141.*

*If Q1135 is greater than Q1138 + Q1139 + Q1140 + Q1141 then skip to Q1142*

*If not, then skip to instruction before Q1143.*

Q1142. **¿Cuántos de estos contactos cercanos fueron...** No-binario/ género no-binario / género fluido/ agénero?

— — —  
997 No Sabe

998 Se rehúsa a contestar

*If Q1142 is not equal to 998 and Q1140 is not equal to 998 and Q1141 is not equal to 998 and Q1142 is greater than Q1135 - Q1140 - Q1141 then READ: "Este número es más grande que el número total. Por favor realice las correcciones necesarias." and skip to Q1142.*

*If Q1135 is greater than Q1138 + Q1139 + Q1140 + Q1141 + Q1142 then skip to Q1143*

*If not, then skip to instruction before Q1144.*

Q1143. **¿Cuántos de estos contactos cercanos fueron...** Otra identidad no incluida en la lista?

— — —

- 997 No Sabe
- 998 Se rehúsa a contestar

*If Q1143 is not equal to 998 and Q1142 is not equal to 998 and Q1140 is not equal to 998 and Q1141 is not equal to 998 and Q1143 is greater than Q1135 - Q1140 - Q1141 - Q1142 then READ: "Este número es más grande que el número total. Por favor realice las correcciones necesarias." and skip to Q1143.*

*If Q1143 is greater than 0 then skip to Q1144*

*If not, then skip to Q1145.*

Q1144. Por favor, especifica.

-----

Q1145. **¿Cuántos de estos contactos cercanos eran...<18 años de edad?**

— — —

- 997 No Sabe
- 998 Se rehúsa a contestar

*If Q1145 is not equal to 997 and Q1145 is not equal to 998 and Q1145 is greater than Q1135 then READ: "Este número es más grande que el número total. Por favor realice las correcciones necesarias." and skip to Q1145.*

*If Q1135 is greater than Q1145 then skip to Q1146*

*If not, then skip to instruction before Q1147.*

Q1146. **¿Cuántos de estos contactos cercanos tenían...18-35 años?**

— — —  
 997 No Sabe  
 998 Se rehúsa a contestar

*If Q1145 is not equal to 997 and Q1145 is not equal to 998 and Q1146 is not equal to 997 and Q1146 is not equal to 998 and Q1146 is greater than Q1135 - Q1145 then READ: "Este número es más grande que el número total. Por favor realice las correcciones necesarias." and skip to Q1146.*

*If Q1135 is greater than Q1145 + Q1146 then skip to Q1147*

*If not, then skip to instruction before Q1148.*

Q1147. **¿Cuántos de estos contactos cercanos tenían...>35 años?**

— — —  
 997 No Sabe  
 998 Se rehúsa a contestar

*If Q1145 is not equal to 997 and Q1145 is not equal to 998 and Q1146 is not equal to 997 and Q1146 is not equal to 998 and Q1147 is not equal to 997 and Q1147 is not equal to 998 and Q1147 is greater than Q1135 - Q1145 - Q1146 then READ: "Este número es más grande que el número total. Por favor realice las correcciones necesarias." and skip to Q1147.*

Q1148. **¿Con cuántos de estos contactos cercanos tuviste sexo vagina o anal en el transcurso de esos 14 días?**

— — —  
 998 Se rehúsa a contestar

*If Q1148 is not equal to 998 and Q1148 is greater than Q1135 then READ: "Este número es más grande que el número total. Por favor realice las correcciones necesarias." and skip to Q1148.*

Q1149. **¿Con cuántos de estos contactos cercanos usaste drogas en el transcurso de esos 14 días?**

— — —  
998

Se rehúsa a contestar

*If Q1149 is not equal to 998 and Q1149 is greater than Q1135 then READ: "Este número es más grande que el número total. Por favor realice las correcciones necesarias." and skip to Q1149.*

Q1150. **Entrevistador:** Qué tan honestas creen Ud. que sea el/la participante en sus respuestas?  
(Elija Uno)

1 Para nada honesto

2 Un poco deshonesto

3 Un poco honesto

4 Muy honesto

*If Q204 is equal to 4 and (Q195 is equal to 1 or Q197 is equal to 1 or Q207 is equal to 1 or Q209 is equal to 1 or Q211 is equal to 1 or Q225 is equal to 1 or Q227 is equal to 1 or Q231 is equal to 1) or Q229 is equal to 1 then skip to Q1151*

*If not, then skip to instruction before Q1152.*

Q1151. ENCUESTADOR: Acabas de recibir la instrucción de hacer una recomendación médica para Clínica de TB. Por favor indica que **SI** para recibir la instrucción al final de la entrevista. (Elija Uno)

1 Si

*If Q191 is equal to 1 or Q193 is equal to 1 or Q195 is equal to 1 or Q197 is equal to 1 or Q199 is equal to 1 or Q201 is equal to 1 or Q203 is equal to 1 or Q205 is equal to 1 or Q207 is equal to 1 or Q209 is equal to 1 or Q213 is equal to 1 or Q215 is equal to 1 or Q217 is equal to 1 or Q219 is equal to 1 or Q221 is equal to 1 or Q223 is equal to 1 or Q227 is equal to 1 then skip to Q1152*

*If not, then skip to end of questionnaire.*

Q1152. ENCUESTADOR: Acabas de recibir la instrucción de hacer una recomendación médica para TB. Por favor indica que **SI** para recibir la instrucción al final de la entrevista. (Elija Uno)

1 Si



**READ: Fin de entrevista.**
